# Supplementary material for: Identification of miRNA–mRNA Regulatory Modules Involved in Lipid Metabolism and Seed Development in a Woody Oil Tree (Camellia oleifera)
Source: MDPI journal article supplement (doi:10.3390/cells11010071), 2021-12-27
Supplement: s1 [file s1]

**Table S10.** Significantly differential expressed miRNAs in the same development stage seeds between two cultivars of ‘M3’ and ‘M8’ of tea oil camellia.

| Comparison stage     | miRNA name                  | <i>P</i> -value ( <i>t</i> -test) | Up/Down |
|----------------------|-----------------------------|-----------------------------------|---------|
| M3T1 <i>vs.</i> M8T1 | mtr-MIR2586a-p3_1ss15TC     | 2.85E-03                          | Up      |
|                      | ath-MIR5645b-p5_2ss19TG21TC | 1.15E-02                          | Up      |
|                      | ath-MIR5645b-p3_2ss19TG21TC | 1.15E-02                          | Up      |
|                      | mtr-MIR2586a-p3_2ss4TG21CT  | 1.94E-02                          | Up      |
|                      | hpe-miR166a_1ss5AC          | 3.35E-02                          | Up      |
| M3T2 <i>vs.</i> M8T2 | rco-miR156e_L+1R-1          | 8.38E-03                          | Down    |
|                      | csi-miR1515_1ss16AG         | 1.41E-02                          | Up      |
|                      | stu-miR8016_1ss7GT          | 1.63E-02                          | Up      |
|                      | dpr-miR167a_R+1             | 1.86E-02                          | Down    |
|                      | ccl-miR167a                 | 2.53E-02                          | Down    |
|                      | tcc-miR390a                 | 3.52E-02                          | Down    |
|                      | ath-miR390a-5p              | 3.52E-02                          | Down    |
|                      | aly-miR167b-3p_1ss13AG      | 3.86E-02                          | Down    |
|                      | ppe-miR172a-5p_1ss21GA      | 4.49E-02                          | Up      |
|                      | han-miR156a_L+1             | 4.92E-02                          | Down    |
| M3T3 <i>vs.</i> M8T3 | col-miRn-3p-9080_426        | 1.36E-02                          | Down    |
|                      | mtr-MIR2586a-p3_1ss15TC     | 1.49E-02                          | Down    |
| M3T4 <i>vs.</i> M8T4 | ghr-MIR7499-p3_2ss10GC17CG  | 1.24E-02                          | Down    |
|                      | rco-miR167a_R+1             | 4.23E-02                          | Down    |
