# Supplementary material for: Identification of miRNA–mRNA Regulatory Modules Involved in Lipid Metabolism and Seed Development in a Woody Oil Tree (Camellia oleifera)
Source: MDPI journal article supplement (doi:10.3390/cells11010071), 2021-12-27
Supplement: s1 [file s1]

**Table S15 Function of target genes involved in seed traits in tea oil camellia in this study.**

| Target genes of identified miRNAs (gene annotation)         | Function                                                                                                                                                                                 | References                   |
|-------------------------------------------------------------|------------------------------------------------------------------------------------------------------------------------------------------------------------------------------------------|------------------------------|
| <b>Lipid metabolism</b>                                     |                                                                                                                                                                                          |                              |
| <i>ACCl</i> (Acetyl CoA Carboxylase 1 )                     | The expressions of ACCase genes are significant to fatty acid and lipid biosynthesis                                                                                                     | Wang, 2012                   |
| <i>KASI</i> (3-ketoacyl-ACP synthase I)                     | <i>KASI</i> is involved in the formation of C16 or C18 saturated fatty acids catalyzed by the fatty acid synthase complex                                                                | Yasuno <i>et al.</i> , 2004  |
| <i>S-ACP-DES6</i> (Secretory acid phosphatase desaturase 6) | S-ACP DES is an archetypical member of a family of soluble fatty acid (FA) desaturases; one or more S-ACP-DES isozymes contribute to the 18:1 pool                                       | Kachroo <i>et al.</i> , 2007 |
| <i>KAS3B</i> (3-ketoacyl-ACP synthase IIIB)                 | The 3-ketoacyl- <i>ACP</i> synthase II proteins are one of the most abundant enzymes in nature, as they are involved in the biosynthesis of fatty acids and natural products             | Nofiani <i>et al.</i> , 2019 |
| <i>fabG</i> (3-ketoacyl-acyl carrier protein reductase)     | FabG is a member of the ketoacyl reductase family of proteins and is an essential enzyme for type II fatty acid biosynthesis                                                             | Lai and Cronan, 2004         |
| <i>Mcat</i> ([acyl-carrier-protein] S-malonyltransferase)   | [acyl-carrier-protein] S-malonyltransferase involved in lipid metabolism                                                                                                                 | Sang <i>et al.</i> , 2013    |
| <i>FATB1</i> (fatty acyl-ACP thioesterase B)                | <i>FATB</i> is a key enzyme gene that mainly controls the conversion of the 16-carbon palmitoyl-ACP to the palmitic acid.                                                                | Dörmann <i>et al.</i> , 2000 |
| <i>MOD1</i> (enoyl-[acyl-carrier protein] reductase I)      | It is a key enzyme in type II fatty-acid synthases that catalyzes the last step in each elongation cycle.                                                                                | Heath <i>et al.</i> , 2000   |
| <i>Δ9D</i> (acyl-[acyl-carrier-protein] desaturase )        | Increased <i>ACP-Δ9D</i> and <i>CoA-Δ9D</i> levels coupled with decreased <i>KASII</i> and <i>FAEI</i> activity is a critical event for high C16:1n7 accumulation in sea buckthorn berry | Ding <i>et al.</i> , 2018    |
| <i>GAPN</i> (glyceraldehyde-3-phosphate dehydrogenase)      | Effects of overexpression of glyceraldehyde-3-phosphate dehydrogenase on growth and lipid accumulation in <i>Chlamydomonas reinhardtii</i>                                               | Lee <i>et al.</i> , 2013     |
| <b>Seed size</b>                                            |                                                                                                                                                                                          |                              |
| <i>ARF1</i> (auxin response factor 1)                       | MiR172 plays highly important roles in seed development by modulating ARF targeting in yellowhorn                                                                                        | Wang <i>et al.</i> , 2021    |
| <i>ARF11</i> (auxin response factor 11)                     | ARFs are potentially involved in the seed size in seeds of sea buckthorn                                                                                                                 | Ding <i>et al.</i> , 2019    |
| <i>ARF12</i> (auxin response factor 12)                     | MiR160 negatively regulates ARFs that significantly affect seed development in <i>A. thaliana</i>                                                                                        | Liu <i>et al.</i> , 2010     |

|                                                                       |                                                                                                                                                                                                                                                |                              |
|-----------------------------------------------------------------------|------------------------------------------------------------------------------------------------------------------------------------------------------------------------------------------------------------------------------------------------|------------------------------|
| <i>ARF19</i> (auxin response factor 19)                               | Transcription factors of <i>SPL</i> , <i>MYB</i> and <i>ARF</i> involved in seed size/weight determination                                                                                                                                     | Gupta <i>et al.</i> , 2016   |
| <i>ARF22</i> (auxin response factor 22)                               |                                                                                                                                                                                                                                                | Khemka <i>et al.</i> , 2021  |
| <i>ARF6</i> (auxin response factor 6)                                 |                                                                                                                                                                                                                                                |                              |
| <i>CNR2</i> (cell number regulator 2)                                 | CNR genes control plant fruit and organ size                                                                                                                                                                                                   | Guo and Simmons, 2011        |
| <i>MED14</i> (Mediator of RNA polymerase II transcription subunit 14) | Mediator subunit OsMED14_1 plays an important role in rice development                                                                                                                                                                         | Malik <i>et al.</i> , 2020   |
| <i>MED18</i> (Mediator of RNA polymerase II transcription subunit 18) | MED18 interaction with distinct transcription factors regulates multiple plant functions                                                                                                                                                       | Lai <i>et al.</i> , 2014     |
| <i>MED27</i> (Mediator of RNA polymerase II transcription subunit 27) | MED27 Variants Cause Developmental Delay, Dystonia, and Cerebellar Hypoplasia                                                                                                                                                                  | Meng <i>et al.</i> , 2021    |
| <i>MED28</i> (Mediator of RNA polymerase II transcription subunit 28) | MED28 Regulates Cell Growth through HMG Box-Containing Protein 1 (HBP1) in Human Breast Cancer Cells                                                                                                                                           | Hsieh <i>et al.</i> , 2013   |
| <i>MYB3</i> (Transcription factor MYB3)                               | Transcription factors of <i>SPL</i> , <i>MYB</i> and <i>ARF</i> involved in seed size/weight determination in chickpea                                                                                                                         | Khemka <i>et al.</i> , 2021  |
| <i>MYB44</i> (Transcription factor MYB44)                             | The function of SIMYB as a candidate gene involved in fruit set process in tomato                                                                                                                                                              | Abdalla <i>et al.</i> , 2013 |
| <i>MYB82</i> (Transcription factor MYB82)                             | Transcription factors of <i>SPL</i> , <i>MYB</i> and <i>ARF</i> involved in seed size/weight determination in chickpea                                                                                                                         | Khemka <i>et al.</i> , 2021  |
| <b>Growth and development</b>                                         |                                                                                                                                                                                                                                                |                              |
| <i>ACS1</i> (1-aminocyclopropane-1-carboxylate synthase)              | Lc-ACS1 gene might be the key gene involved in fruit let abscission in litch                                                                                                                                                                   | Wu <i>et al.</i> , 2017      |
| <i>AFB2</i> (Protein AUXIN SIGNALING F-BOX 2)                         | The <i>AFB2</i> gene is one of auxin receptor genes, which is involved in hormone regulation and signal transduction in plants                                                                                                                 | Schwab <i>et al.</i> , 2005  |
| <i>COL13</i> (Zinc finger protein CONSTANS-LIKE 13)                   | AtCOL13 inhibits hypocotyl elongation of Arabidopsis under red light                                                                                                                                                                           | Zhang, 2012                  |
| <i>ERF115</i> (EREBP-like factor)                                     | The ERF115–PAT1 complex plays an important role in full stem cell niche recovery                                                                                                                                                               | Heyman <i>et al.</i> , 2016  |
| <i>SBP1</i> (Squamosa promoter-binding protein 1)                     | SBP1 is an important component of the atypical SCF complex, playing an unique role in the selfcompatibility system of gametes                                                                                                                  | Yu <i>et al.</i> , 2019      |
| <i>SBP2</i> (Squamosa promoter-binding protein 2)                     | An SBP2-GFP fusion protein under the control of the GmSBP2 promoter accumulates in the vascular tissues of vegetative organs, which is consistent with the proposed involvement of SBP in sucrose transport-dependent physiological processes. | Freitas <i>et al.</i> , 2007 |
| <i>SCL16</i> (Scarecrow-like protein 6)                               | SCL transcription factor family members in <i>Arabidopsis</i> involved in the growth and development of flowers, roots and stems                                                                                                               | Sunkar <i>et al.</i> , 2004  |

|                                                                                      |                                                                                                                                                                                                                                    |                                                             |
|--------------------------------------------------------------------------------------|------------------------------------------------------------------------------------------------------------------------------------------------------------------------------------------------------------------------------------|-------------------------------------------------------------|
| <i>SPL4</i> (Squamosa promoter-binding-like protein 4)                               | Transcription factors of <i>SPL</i> , <i>MYB</i> and <i>ARF</i> involved in seed size/weight determination in chickpea                                                                                                             | Khemka <i>et al.</i> , 2021                                 |
| <i>TIR1</i> (transport inhibitor response 1)                                         | The <i>TIR1</i> gene is one of auxin receptor genes, which is involved in hormone regulation and signal transduction in plants                                                                                                     | Schwab <i>et al.</i> , 2005                                 |
| <i>TCP24</i> (Transcription factor TCP24)                                            | <i>TCP24</i> modulates secondary cell wall thickening and anther endothecium development                                                                                                                                           | Han <i>et al.</i> , 2015                                    |
| <b>Resistance, yield and quality</b>                                                 |                                                                                                                                                                                                                                    |                                                             |
| <i>APUM5</i> (Pumilio homolog 5)                                                     | APUM5 suppresses <i>Cucumber mosaic virus</i> infection via direct binding of viral RNAs                                                                                                                                           | Huh <i>et al.</i> , 2013                                    |
| <i>BAG7</i> (BAG family molecular chaperone regulator 7)                             | BAG protein family is an evolutionarily conserved kind of co-chaperone from yeast to animals and plants. The family members can perform several of cellular functions including stress response, growth, and programmed cell death | Wei <i>et al.</i> 2016                                      |
| <i>BAM1</i> (leucine-rich repeat receptor-like serine/threonine-protein kinase BAM1) | BAM1/2 receptor kinase signaling drives CLE peptide-mediated formative cell divisions in <i>Arabidopsis</i> roots                                                                                                                  | Crook <i>et al.</i> , 2020                                  |
| <i>CPR30</i> (F-box protein CPR30)                                                   | The <i>CPR30</i> gene is a negative regulator of the defense response in <i>Arabidopsis</i>                                                                                                                                        | Gou <i>et al.</i> , 2010                                    |
| <i>ERF106</i> (EREBP-like factor)                                                    | This gene might have role in eliciting responses to combat stress and attribute the strong stress tolerant property associated with the plant                                                                                      | Tripathi <i>et al.</i> , 2020                               |
| <i>MYB4</i> (Myb-related protein Myb4)                                               | <i>MYB4</i> gene is involved in drought stress response, and the regulation mechanism may be related to stomata                                                                                                                    | Ouyang, 2019                                                |
| <i>NRT1.7</i> (proton-dependent oligopeptide transporter, POT family)                | The <i>Arabidopsis NLP7</i> gene regulates nitrate signaling via <i>NRT1.1</i> –dependent pathway in the presence of ammonium                                                                                                      | Zhao <i>et al.</i> , 2018                                   |
| <i>Os03g0214200</i> (Ninja-family protein Os03g0214200)                              | <i>Os03g0214200</i> is one of important candidate genes for <i>qLTGR3-1</i> of major QTL for germination ability of rice seeds at low temperature                                                                                  | Pan, 2018                                                   |
| <i>PAB2</i> (20S proteasome subunit alpha 2)                                         | Conserved expression of <i>Arabidopsis thaliana</i> poly (A) binding protein 2 (PAB2) in distinct vegetative and reproductive tissues                                                                                              | Palanivelu <i>et al.</i> , 2010                             |
| <i>PYL1</i> (Absciscic acid receptor PYL1)                                           | This gene might be involved in the dormancy process of gladiolus corms regulated by ABA                                                                                                                                            | Luo <i>et al.</i> , 2019                                    |
| <i>SGS3</i> (Protein SUPPRESSOR OF GENE SILENCING 3)                                 | BnSGS3 gene conferred moderate resistance to CMV; SGS3 and SGS2/SDE1/RDR6 are required for juvenile development and the production of trans-acting siRNAs in <i>Arabidopsis</i>                                                    | Peragine <i>et al.</i> , 2004;<br>Chen <i>et al.</i> , 2015 |
| <i>SPL16</i> (Squamosa promoter-binding-like protein 16)                             | The <i>OsSPL16-GW7</i> regulatory module determines grain shape and simultaneously improves rice yield and grain quality                                                                                                           | Wang <i>et al.</i> , 2014                                   |
| <i>XDH1</i> (xanthine dehydrogenase/oxidas)                                          | Antisense inhibition of xylitol dehydrogenase gene, <i>xdh1</i> from <i>Trichoderma reesei</i>                                                                                                                                     | Wang <i>et al.</i> , 2010                                   |

## References:

Abdalla, A.H.S. Characterization of a myb gene from tomato (*solanum lycopersicum*) involved in fruit development. *Docencia*, 2013, <http://hdl.handle.net/10251/44563>

Chen, Q.; Wang, J.; Hou, M.S.; Liu, S.Y.; Cai, L. *Brassica napus* BnSGS3 gene sequence analysis, vector construction and resistance identification of transgenic *Arabidopsis thaliana* to viruses. *Chinese J. Oil Crop Sci.* 2015, 37(4): 512-519

Crook, A.D.; Willoughby, A.C.; Hazak, O.; Okuda, S.; Van Der Molen, K.R.; Soyars, C.L.; Cattaneo, P.; Clark, N.M.; Sozzani, R.; Hothorn, M.; Hardtke, C.S.; Nimchuk, Z.L. BAM1/2 receptor kinase signaling drives CLE peptide-mediated formative cell divisions in *Arabidopsis* roots. *PNAS*, 2020, 117: 32750-32756

Ding, J.; Ruan, C.J.; Guan, Y.; Krishna, P. Identification of microRNAs involved in lipid biosynthesis and seed size in developing sea buckthorn seeds using high-throughput sequencing. *Sci. Rep.* 2018, 8: 4022

Ding, J.; Ruan, C.J.; Du, W.; Guan, Y. RNA-seq data reveals a coordinated regulation mechanism of multigenes involved in the high accumulation of palmitoleic acid and oil in sea buckthorn berry pulp. *BMC Plant Biol.* 2019, 19, 207.

Dörmann, P.; Voelker, T.A.; Ohlrogge, J.B. Accumulation of palmitate in *Arabidopsis* mediated by the acyl-acyl carrier protein thioesterase *FATB1*. *Plant Physiol.* 2020, 123: 637-644

Freitas, R.L., Carvalho, C.M., Fietto, L.G., Loureiro, M.E., Almeida, A.M., Fontes, E. Distinct repressing modules on the distal region of the sbp2 promoter contribute to its vascular tissue-specific expression in different vegetative organs. *Plant Mol. Biol.* 2007; 65(5): 603-614.

Gou, M.; Nan, S.; Zheng, J.; Huai, J.; Wang, G. An f-box gene, cpr30, functions as a negative regulator of the defense response in *Arabidopsis*. *Plant J.* 2010, 60(5): 757-770.

Guo, M.; Simmons, C.R. Cell number counts--the fw2.2 and CNR genes and implications for controlling plant fruit and organ size. *Plant Sci.* 2011; 181, 1–7.

Gupta, M.; Bhaskar, P.B.; Sriram, S.; Sriram, S.; Wang, P.H. Integration of omics approaches to understand oil/protein content during seed development in oilseed crops. *Plant Cell Rep.* 2016, 36, 1–16.

Han, W.; Mao, Y.; Yang, J.; He, Y. TCP24 modulates secondary cell wall thickening and anther endothecium development. *Front. Plant Sci.* 2015, 6: 436.

Heath, R.J.; Su, N.; Murphy, C.K.; Rock, C.O. The Enoyl-[acyl-carrier-protein] reductases *FabI* and *FabL* from *Bacillus subtilis*. *J. Biol. Chem.* 2000, 275: 40128-40133

Heyman, J.; Cools, T.; Canher, B. The heterodimeric transcription factor complex ERF115–PAT1 grants regeneration competence. *Nat. Plants* 2016, 2, 16165

Hsieh, N.T.; Huang, C.Y.; Chou, Y.H.; Ung, W.C.; Lee, M.F. Med28 regulates cell growth through hmg box-containing protein 1 (hbp1) in human breast cancer cells. *Faseb J.* 2013, 27:1028.1

Huh S.U.; Kim, M.J.; Paek, K.H. *Arabidopsis* Pumilio protein APUM5 suppresses *Cucumber mosaic virus* infection via direct binding of viral RNAs. *PNAS*, 2013, 110: 779-784

Kachroo A.; Shanklin J.; Whittle E.; Lapchuk L.; Hildebrand D.; Kachroo P. The *Arabidopsis* stearoyl-acyl carrier protein-desaturase family and the contribution of leaf isoforms to oleic acid synthesis. *Plant Mol. Biol.* 2007, 63(2): 257-271

Khemka, N.; Rajkumar, M.S.; Garg, R.; Jain, M. Genome-wide profiling of miRNAs during seed development reveals their functional relevance in seed size/weight determination in chickpea. *Plant Direct* 2021, 5(3): e00299

Lai, C.Y.; Cronan, J.E. Isolation and characterization of  $\beta$ -ketoacyl-acyl carrier protein reductase (*fabG*) mutants of *Escherichia coli* and *Salmonella enterica* serovar Typhimurium. *J. Bacteriol.* 2004, 186: 1869-1878

Lai, Z., Schluttenhofer, C., Bhide, K. Shreve J, Thimmapuram J, Lee SY, Yun DJ, Mengiste T. MED18 interaction with distinct transcription factors regulates multiple plant functions. *Nat Commun* 2014, 5, 3064

Lee, B.; Shin, S.E.; Choi, G.G.; Jeong, B.; Park, M.S.; Yang, J.W. Effects of overexpression of GAPDH on growth and lipid accumulation in *Chlamydomonas reinhardtii*. Asian Symposium on Innovative Biorefinery in Beijing, 2013.

Liu, P.P.; Montgomery, T.A.; Fahlgren, N.; Kasschau, K.D.; Carrington, J. C. Repression of AUXIN RESPONSE FACTOR10 by microRNA160 is critical for seed germination and post-germination stages. *Plant J.* 2010, 52, 133–146.

Luo, X.; Yuan, Y.; Lu, H.; Wu, Y.; Yuan, L.; Jia, Y. Cloning and expression analysis of aba receptor gene pyl1 in gladiolus. *Mol. Plant Breeding*, 2019, 17: 3484-3489

Malik, N.; Ranjan, R.; Parida, S.K.; Agarwal, P.; Tyagi, A.K. Mediator subunit OsMED14\_1 plays an important role in rice development. *Plant J.* 2020, 101(6):1411-1429.

- Meng, L.Y.; Isohanni, P.; Shao, Y.R.; Graham, B.H.; Hickey, S.E.; Brooks, S.; Suomalainen, A.; Joset, P.; Steindl, K.; Rauch, A. MED27 variants cause developmental delay, dystonia, and cerebellar hypoplasia. *Ann. Neurol.* 2021, 89: 828-833
- Nofiani, R.; Philmus, B.; Nindita, Y.; Mahmud, T. 3-ketoacyl-acp synthase (kas) iii homologues and their roles in natural product biosynthesis. *Medic. Chem. Commun.* 2019, 10:1517-1530
- Ouyang, J. The mechanism of MYB4 gene involved in the response of drought stress in plants. Hefei University of Technology, A dissertation of Master's Degree, 2019
- Palanivelu, R.; Belostotsky, D.A.; Meagher, R.B. Conserved expression of arabidopsis thaliana poly (a) binding protein 2 (pab2) in distinct vegetative and reproductive tissues. *Plant J.* 2010, 22(3), 199-210.
- Pan, Z.Y. Mapping of QTLs controlling seed low temperature germinability and fine mapping and transcriptome analysis of qLTGR3-1 in rice. Huazhong Agricultural University, Dissertation of Master's Degree, 2018
- Peragine, A.; Yoshikawa, M.; Wu, G.; Albrecht, H.L.; Poethig, R.S. SGS3 and SGS2/SDE1/RDR6 are required for juvenile development and the production of trans-acting siRNAs in *Arabidopsis*. *Genes Dev.* 2004, 18: 2368-79
- Sang, Y.S.; Sang, H.K.; Velusamy, V.; Lee, Y.M. Comparative gene expression analysis in a highly anthocyanin pigmented mutant of colorless chrysanthemum. *Mol. Biol. Rep.* 2013, 40: 5177-5189.
- Schwab, R.; Palatnik, J.F.; Riester, M.; Schommer, C.; Schmid, M.; Weigel, D. Specific effects of microRNAs on the plant transcriptome. *Dev. Cell* 2005, 8, 517–527.
- Sunkar, R.; Zhu, J.K. Novel and stress-regulated microRNAs and other small RNAs from *Arabidopsis*. *Plant Cell* 2004; 16: 2001-2019
- Tripathi, S.; Srivastava, Y.; Sangwan, R.S.; Sangwan, N.S. Mining and functional analysis of ap2/erf gene in. *Sci. Rep.* 2020, 10: 4877.
- Wang, B.M. Molecular cloning and functional study of ACCase genes from *Camellia oleifera*. Central South University of Forestry and Technology, Ph.D dissertation, 2012.
- Wang, L.; Ruan, C.J.; Bao, A.; Li, H. Small RNA profiling for identification of microRNAs involved in regulation of seed development and lipid biosynthesis in yellowhorn. *BMC Plant Biol.* 2021, 21, 464.
- Wang, S.; Li, S.; Liu, Q. The *OsSPL16-GW7* regulatory module determines grain shape and simultaneously improves rice yield and grain quality. *Nat Genet* 2014, 47, 949–954
- Wang, T.H.; Zhong, Y.H.; Huang, W.; Liu, T.; You, Y.W. Antisense inhibition of xylitol dehydrogenase gene, *xdh1* from *trichoderma reesei*. *Letters Appl. Microbiol.* 2010, 40(6), 424-429.
- Wei, R.M.; Xie, L.L.; Ouyang, X.; Zhang, Y.L.; Dai, Z.Z.; Liu, F. The Structure and Functional Characteristics of Plant BAG Protein Family. *Hunan Agri. Sci.* 2016, (09): 115-120 (in Chinese with an English abstract)
- Wu, J.Y.; Li, C.Q.; Li, J.G.J. Isolation of *acs1* gene and the relationship between its expression and fruitlet abscission in litchi. *J. Fruit Sci.* 2017, 34: 817-827
- Yasuno, R.; von Wettstein-Knowles, P.; Wada, H. Identification and molecular characterization of the beta-Ketoacyl-[Acyl Carrier Protein] synthase component of the *Arabidopsis* mitochondrial fatty acid synthase. *J. Biol. Chem.* 2004, 279, 8242–8251.
- Yu, Z.; Ma, X.; Zeng, B.; Wang, J.; AbdkymAymt. Research progress on *sbp1* gene of plant gametophytic self-incompatibility. *Mol. Plant Breeding* 2019, 17: 5285-5290 (in Chinese with an English abstract)
- Zhang, Q. Analysis of signaling pathway in which AtCOL13 inhibits hypocotyl elongation of Arabidopsis under red light. South China Normal University, Dissertation for Master's Degree, 2012.
- Zhao, L.; Zhang, W.; Yang, Y. The Arabidopsis NLP7 gene regulates nitrate signaling via NRT1.1-dependent pathway in the presence of ammonium. *Sci. Rep.* 8, 1487 (2018).
