# Supplementary material for: Identification of miRNA–mRNA Regulatory Modules Involved in Lipid Metabolism and Seed Development in a Woody Oil Tree (Camellia oleifera)
Source: MDPI journal article supplement (doi:10.3390/cells11010071), 2021-12-27
Supplement: s1 [file s1]

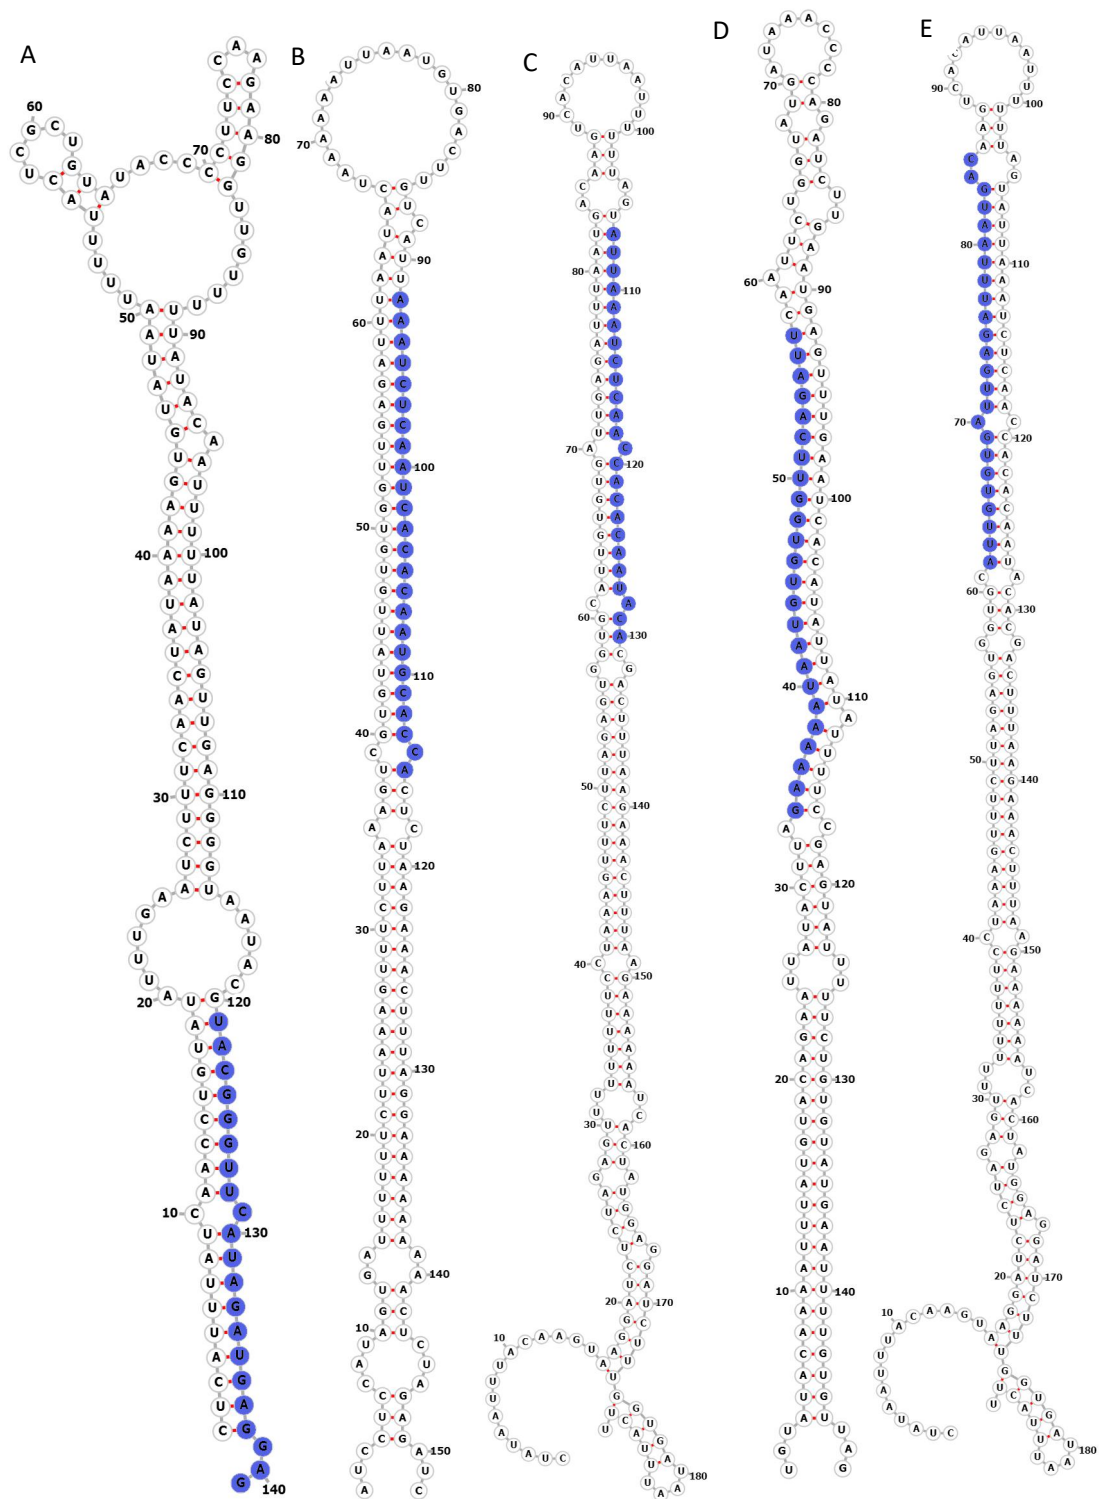

Figure S2 Secondary structures of the five most abundant novel miRNA precursors in tea oil camellia. A: col-miRn-5p-1103\_1978; B: col-miRn-5p-2142\_1228; C: col-miRn-3p-18781\_243; D: col-miRn-3p-3803\_812; E: col-miRn-3p-18137\_250. Blue indicate segments corresponding to the mature miRNAs
