# Supplementary material for: Identification of miRNA–mRNA Regulatory Modules Involved in Lipid Metabolism and Seed Development in a Woody Oil Tree (Camellia oleifera)
Source: Cells. 2021 Dec 27;11(1):71. doi: 10.3390/cells11010071 (PMC8750442; doi:10.3390/cells11010071)
Supplement: Supplementary file 1 [file cells-11-00071-s001.zip]

Archive with 18 entries (18 files):
- Figure S1.png
- Figure S2.pdf
- Figure S3.tif
- Table S1.xlsx
- Table S10.pdf
- Table S11.xlsx
- Table S12.xlsx
- Table S13.xlsx
- Table S14.xlsx
- Table S15.pdf
- Table S2.xlsx
- Table S3.xlsx
- Table S4.xlsx
- Table S5.xlsx
- Table S6.xlsx
- Table S7.xlsx
- Table S8.xlsx
- Table S9.xlsx
