# Supplementary material for: Identification of miRNA–mRNA Regulatory Modules Involved in Lipid Metabolism and Seed Development in a Woody Oil Tree (Camellia oleifera)
Source: Cells. 2021 Dec 27;11(1):71. doi: 10.3390/cells11010071 (PMC8750442; doi:10.3390/cells11010071)
Supplement: Supplementary file 1 [file cells-11-00071-s001.zip › Table S1.xlsx]

## Sheet: Sheet1
Table S1. Spefific species is related species of tea oil camellia
V22 (June, 2013)			http://www.mirbase.org/cgi-bin/browse.pl
Release New:			ftp://mirbase.org/pub/mirbase/CURRENT/README
	界	总门	门	亚门	纲	目	科	Organism	Common name	3 letter name	V22.0
							Fabaceae	Acacia auriculiformis	Acacia auriculiformis	aau	7
	Viridiplantae		Magnoliophyta		eudicotyledons		Fabaceae	Arachis hypogaea	Penut	ahy	23
	Viridiplantae		Magnoliophyta		eudicotyledons		Brassicaceae	Arabidopsis lyrata	Arabidopsis lyrata	aly	206
	Viridiplantae		Magnoliophyta		eudicotyledons		Lamiales	Avicennia marina	White mangrove	ama	2
							Fabaceae	Acacia mangium	Acacia mangium	amg	3
	Viridiplantae		Magnoliophyta		eudicotyledons		Ranunculaceae	Aquilegia caerulea	Aquilegia coerulea	aqc	45
	Viridiplantae		Magnoliophyta		monocotyledons			Aegilops tauschii	Aegilops taushii	ata	90
	Viridiplantae		Magnoliophyta		eudicotyledons		Brassicaceae	Arabidopsis thaliana	Arabidopsis thaliana	ath	329
	Viridiplantae		Magnoliophyta		eudicotyledons		Rhizophoraceae	Bruguiera cylindrica	Bruguiera cylindrica	bcy	4
	Viridiplantae		Magnoliophyta		monocotyledons			Brachypodium distachyon	Purple false brome	bdi	328
	Viridiplantae		Magnoliophyta		eudicotyledons		Rhizophoraceae	Bruguiera gymnorhiza	Bruguiera gymnorhiza	bgy	4
	Viridiplantae		Magnoliophyta		eudicotyledons		Brassicaceae	Brassica napus	Oilseed rape	bna	92
	Viridiplantae		Magnoliophyta		eudicotyledons		Brassicaceae	Brassica oleracea	Wild cabbage	bol	10
	Viridiplantae		Magnoliophyta		eudicotyledons		Brassicaceae	Brassica rapa	Turnip	bra	96
	Viridiplantae		Magnoliophyta		eudicotyledons		Asteraceae	Cynara cardunculus	Cynara cardunculus	cca	48
	Viridiplantae		Magnoliophyta		eudicotyledons		Rutaceae	Citrus clementine	Citrus clementine	ccl
	Viridiplantae		Magnoliophyta		eudicotyledons		Cucurbitaceae	Cucumis melo	Cucumis melo	cme	120
	Viridiplantae		Magnoliophyta		eudicotyledons		Caricaceae	Carica papaya	Carica papaya	cpa	79
	Viridiplantae		Magnoliophyta		eudicotyledons		Rutaceae	Citrus reticulata	Citrus reticulata	crt	4
	Viridiplantae		Magnoliophyta		eudicotyledons		Rutaceae	Citrus sinensis	Citrus sinensis	csi	157
	Viridiplantae		Magnoliophyta		eudicotyledons		Rutaceae	Citrus trifoliata	Citrus trifoliata	ctr	6
Metazoa	Bilateria	Ecdysozoa	Arthropoda	Hexapoda				Drosophila ananassae	Drosophila ananassae	dan	76
	Viridiplantae		Magnoliophyta		eudicotyledons		Lamiales	Digitalis purpurea	common foxglove	dpr	13
	Viridiplantae		Magnoliophyta		monocotyledons			Elaeis guineensis	African oil palm	egu	6
	Viridiplantae		Magnoliophyta		monocotyledons			Festuca arundinacea	Tall fescue	far	15
	Viridiplantae		Magnoliophyta		eudicotyledons		Malvaceae	Gossypium arboreum	Tree cotton	gar	1
	Viridiplantae		Magnoliophyta		eudicotyledons		Malvaceae	Gossypium herbaceum	Levant cotton	ghb	1
	Viridiplantae		Magnoliophyta		eudicotyledons		Malvaceae	Gossypium hirsutum	Mexican cotton	ghr	78
	Viridiplantae		Magnoliophyta		eudicotyledons		Fabaceae	Glycine max	Soybean	gma	685
	Viridiplantae		Magnoliophyta		eudicotyledons		Malvaceae	Gossypium raimondii	G. raimondii	gra	296
	Viridiplantae		Magnoliophyta		eudicotyledons		Fabaceae	Glycine soja	Wild soybean	gso	13
	Viridiplantae		Magnoliophyta		eudicotyledons		Asteraceae	Helianthus annuus	Sunflower	han	8
	Viridiplantae		Magnoliophyta		eudicotyledons		Asteraceae	Helianthus argophyllus	Silverleaf sunflower	har	3
	Viridiplantae		Magnoliophyta		eudicotyledons		Euphorbiaceae	Hevea brasiliensis	Rubber tree	hbr	31
	Viridiplantae		Magnoliophyta		eudicotyledons		Asteraceae	Helianthus ciliaris	Texas blueweed	hci	3
	Viridiplantae		Magnoliophyta		eudicotyledons		Asteraceae	Helianthus exilis	Serpentine sunflower	hex
	Viridiplantae		Magnoliophyta		eudicotyledons		Asteraceae	Helianthus paradoxus	Puzzle Sunflower	hpa	3
	Viridiplantae		Magnoliophyta		eudicotyledons		Asteraceae	Helianthus petiolaris	Prairie sunflower	hpe	3
	Viridiplantae		Magnoliophyta		eudicotyledons		Asteraceae	Helianthus tuberosus	Jerusalem artichoke	htu	16
	Viridiplantae		Magnoliophyta		monocotyledons			Hordeum vulgare	Common barley	hvu	70
	Viridiplantae		Magnoliophyta		eudicotyledons		Fabaceae	Lotus japonicus	Lotus japonicus	lja	299
	Viridiplantae		Magnoliophyta		eudicotyledons		Linaceae	Linum usitatissimum	Common flax	lus	124
	Viridiplantae		Magnoliophyta		eudicotyledons		Rosaceae	Malus domestica	Apple	mdm	308
	Viridiplantae		Magnoliophyta		eudicotyledons		Euphorbiaceae	Manihot esculenta	Cassava	mes	174
	Viridiplantae		Magnoliophyta		eudicotyledons		Fabaceae	Medicago truncatula	M. truncatula	mtr	709
	Viridiplantae		Magnoliophyta		eudicotyledons		Solanaceae	Nicotiana tabacum	Cultivated tobacco	nta	163
	Viridiplantae		Magnoliophyta		monocotyledons			Oryza sativa	Rice	osa	671
	Viridiplantae		Magnoliophyta		eudicotyledons		Salicaceae	Populus euphratica	Populus euphratica	peu	8
	Viridiplantae		Magnoliophyta		eudicotyledons		Araliaceae	Panax ginseng	Ginseng	pgi	29
	Viridiplantae		Magnoliophyta		eudicotyledons		Rosaceae	Prunus persica	Peach	ppe	180
	Viridiplantae		Magnoliophyta		eudicotyledons		Salicaceae	Populus trichocarpa	Cottonwood	ptc	364
	Viridiplantae		Magnoliophyta		eudicotyledons		Fabaceae	Phaseolus vulgaris	Common bean	pvu	8
	Viridiplantae		Magnoliophyta		eudicotyledons		Euphorbiaceae	Ricinus communis	Castor oil plant	rco	63
	Viridiplantae		Magnoliophyta		eudicotyledons		Lamiales	Rehmannia glutinosa	Rehmannia glutinosa	rgl	32
	Viridiplantae		Magnoliophyta		monocotyledons			Sorghum bicolor	Sorghum	sbi	211
	Viridiplantae		Magnoliophyta		eudicotyledons		Solanaceae	Solanum lycopersicum	Tomato	sly	112
	Viridiplantae		Magnoliophyta		monocotyledons			Saccharum officinarum	Saccharum officinarum	sof	16
	Viridiplantae		Magnoliophyta		eudicotyledons		Lamiales	Salvia sclarea	Salvia sclarea	ssl	18
	Viridiplantae		Magnoliophyta		eudicotyledons		Solanaceae	Solanum tuberosum	Irish potato	stu	224
	Viridiplantae		Magnoliophyta		monocotyledons			Triticum aestivum	Common wheat	tae	124
	Viridiplantae		Magnoliophyta		eudicotyledons		Malvaceae	Theobroma cacao	cocoa tree	tcc
	Viridiplantae		Magnoliophyta		monocotyledons			Triticum turgidum	Rivet wheat	ttu	1
	Viruses							Torque teno virus	Torque teno virus	ttv	1
	Viridiplantae		Magnoliophyta		eudicotyledons		Fabaceae	Vigna unguiculata	Vigna unguiculata	vun	18
	Viridiplantae		Magnoliophyta		eudicotyledons		Vitaceae	Vitis vinifera	Grape	vvi	168
	Viridiplantae		Magnoliophyta		monocotyledons			Zea mays	Corn	zma	174
	SUM
