# Supplementary material for: Identification of miRNA–mRNA Regulatory Modules Involved in Lipid Metabolism and Seed Development in a Woody Oil Tree (Camellia oleifera)
Source: Cells. 2021 Dec 27;11(1):71. doi: 10.3390/cells11010071 (PMC8750442; doi:10.3390/cells11010071)
Supplement: Supplementary file 1 [file cells-11-00071-s001.zip › Table S2.xlsx]

## Sheet: Sheet1
Table S2. Primers used for qRT-PCR of selected mature miRNAs
miRNA name	Specific Primers Sequence
han-miR156a_L+1	ATGACAGAAGAGAGTGAGCAC
rco-miR156e_L+1R-1	TTGACAGAAGAGAGAGAGCAC
mtr-miR156h-3p_1ss8AC	GCTCTTTCTTCTTCTGTCATC
PC-3p-9080_426	AAATCTCCCAACCAAACACAGCGT
nta-miR6149a-p5_2ss18CT21TA	ATACGCACCTGAATCGGTAGA
ppe-miR172a-5p_1ss21GA	GTAGCATCATCAAGATTCACA
