# Supplementary material for: Identification of miRNA–mRNA Regulatory Modules Involved in Lipid Metabolism and Seed Development in a Woody Oil Tree (Camellia oleifera)
Source: Cells. 2021 Dec 27;11(1):71. doi: 10.3390/cells11010071 (PMC8750442; doi:10.3390/cells11010071)
Supplement: Supplementary file 1 [file cells-11-00071-s001.zip › Table S3.xlsx]

## Sheet: Sheet1
Table S3. Primers used for qRT-PCR of selected miRNAs target gene
Target genes name	Primers Sequence (5'-3')	Fragment length (bp)
SPL4	F:CAATGAGCGTCGTAGGAAGAA	109
	R:CTCATCAACCTGCCCTGAAA
SBP1	F:GCATTTGAGGAACAAGTCGATG	102
	R:GAGCTGTGAAGCGGTAGATT
TCP24	F:CTCGGTCACCACTGCTATTC	92
	R:CCGCTTTAAGAAGCCACTCTA
PAB2	F:TAGGAAGCAGGCAGAACAATAC	113
	R:TTACACCACCTGACTGAGTAAAC
CPR30	F:GGAACCCATCAACTCGAAAGTA	112
	R:CTCACTGAATCGTACCCAAGTC
ERF115	F:GTCTCAGCTCTCACTCAAGTTATT	130
	R:GACTGGGTTGAGATTGGTTAGG
