# Supplementary material for: Identification of miRNA–mRNA Regulatory Modules Involved in Lipid Metabolism and Seed Development in a Woody Oil Tree (Camellia oleifera)
Source: Cells. 2021 Dec 27;11(1):71. doi: 10.3390/cells11010071 (PMC8750442; doi:10.3390/cells11010071)
Supplement: Supplementary file 1 [file cells-11-00071-s001.zip › Table S4.xlsx]

## Sheet: Sheet1
Table S4. Summary of sequencing data from raw data to cleaned sequences from developing seeds of the‘M3’ cultivar of tea oil camellia.
Type	M3T1		M3T2		M3T3		M3T4
	Total	% of Total	Total	% of Total	Total	% of Total	Total	% of Total
Raw reads	12946792	100	13780949	100	13752895	100	13809896	100
3ADT&length filter	859619	6.74	1423676	11.16	2186989	16.57	1.94009e+06	13.51
Junk reads	156451	1.22	180196	1.3	139242	1.01	170537	1.23
Rfam	96448	0.75	210761	1.64	171818	1.21	137337	0.99
Repeats	827	0.01	1222	0.01	764	0.01	1377	0.01
rRNA	79946	0.63	174227	1.36	127987	0.9	108722	0.79
tRNA	6620	0.05	15926	0.13	29933	0.21	17795	0.13
snoRNA	4205	0.04	8290	0.07	6252	0.05	2150	0.02
snRNA	3240	0.03	5881	0.04	3381	0.02	565	0.01
other Rfam RNA	2438	0.02	6437	0.06	4266	0.03	8106	0.06
Valid reads	11833671	91.29	11965754	85.9	11254438	81.21	11561456	84.27
Note:T1, T2, T3, and T4 indicated four different seed developmental stages in the ‘M3’cultivar of tea oil camellia, respectively.
