# Supplementary material for: Identification of miRNA–mRNA Regulatory Modules Involved in Lipid Metabolism and Seed Development in a Woody Oil Tree (Camellia oleifera)
Source: Cells. 2021 Dec 27;11(1):71. doi: 10.3390/cells11010071 (PMC8750442; doi:10.3390/cells11010071)
Supplement: Supplementary file 1 [file cells-11-00071-s001.zip › Table S5.xlsx]

## Sheet: Sheet1
Table S5. Summary of sequencing data from raw data to cleaned sequences from the developing seeds of ‘M8’ cultivar of tea oil camellia.
Type	M8T1		M8T2		M8T3		M8T4
	Total	% of Total	Total	% of Total	Total	% of Total	Total	% of Total
Raw reads	14098661	100	14019755	100	13685880	100	14928496	100
3ADT&length filter	1123256	8.02	3079021	22.02	1021631	7.6	844406	5.65
Junk reads	202171	1.44	154714	1.1	173836	1.27	124916	0.84
Rfam	349178	2.52	314876	2.25	105619	0.77	241029	1.62
Repeats	2414	0.02	1999	0.02	1301	0.01	1496	0.01
rRNA	297646	2.15	253776	1.81	89998	0.66	213619	1.43
tRNA	28105	0.21	30056	0.22	10489	0.08	16423	0.11
snoRNA	9506	0.07	12363	0.09	2857	0.02	6400	0.04
snRNA	4473	0.03	6312	0.05	787	0.01	1088	0.01
other Rfam RNA	9449	0.07	12370	0.09	1488	0.01	3500	0.02
Valid reads	12423218	88.02	10470197	74.62	12383775	90.36	13717317	91.9
Note:T1, T2, T3, and T4 indicated four different seed developmental stages of the‘M8’ cultivar of tea oil camellia, respectively.
