# Supplementary material for: Identification of miRNA–mRNA Regulatory Modules Involved in Lipid Metabolism and Seed Development in a Woody Oil Tree (Camellia oleifera)
Source: Cells. 2021 Dec 27;11(1):71. doi: 10.3390/cells11010071 (PMC8750442; doi:10.3390/cells11010071)
Supplement: Supplementary file 1 [file cells-11-00071-s001.zip › Table S6.xlsx]

## Sheet: Sheet1
Table S6. Classifications and pre-precursors of known and novel miRNAs in developing seeds of tea oil camellia in this study.
Item	Description
Pre-miRNA Index	Pre-miRNA Cluster Index
miRNA_Index	mature miRNA
miR_name	The miR_name is composed of the 1st known miR name in a cluster, a underscore, and a matching annotation: such as
	L-n means the miRNA_seq (detected) is n base less than known rep_miRSeq in the left side;
	R-n means the miRNA_seq (detected) is n base less than known rep_miRSeq in the right side;
	L+n means the miRNA_seq (detected) is n base more than known rep_miRSeq in the left side;
	R+n means the miRNA_seq (detected) is n base more than known rep_miRSeq in the right side;
	2ss5TC13TA means 2 substitution (ss), which are T->C at position 5 and T->A at position 13
	if there is no matching annotation, the miRNA_seq (detected) is exactly same as known rep_miRSeq.
	New discovered 5p/3p sequence has been annotated as p3/p5: which is directly differentiate with the reported sequences,
miR_seq	is a read at 5' or 3' of maximum mapped score in each cluster.
len	miR_seq length
genome ID	Reference Genome Information
strand	strand "+" or "-"
start	pre-miRNA start position
end	Pre-miRNA end position
pre-miRNA_seq	pre-miRNA sequence
#mir/MIR	mapped mir numbers in miRbase, the number in this item eaquals to the sum of mirIDs
mirIDs	is all mirID in a cluster, seprated by ,
rep_mirID	is the representative known mirID
rep_mirSeq	is the representative known mir sequence
rep_miRID	is the representative known miRID
rep_miRSeq	is the representative known miR sequence
type	is 5' or 3', which means the cluster appears at 5' or 3' end
Sequence in miRbase	New, miRNA identified in this study and not reported in miRBase,mainly for new reported 5p or 3p sequence; Diff, confirming miRNA sequences in miRBase, but different sequences are reported in our study; and Yes, confirming miRNA sequences in miRBase.
	gp2a:Reads were mapped to miRNAs/pre-miRNAs of selected species in miRbase and the mapped pre-miRNAs were not further mapped to genome, but the reads (and of course the miRNAs of the pre-miRNAs) were mapped to genome. The extended genome sequences from the genome loci may form hairpins.
	gp2b:Reads were mapped to miRNAs/pre-miRNAs of selected species in miRbase and the mapped pre-miRNAs were not further mapped to genome, but the reads (and of course the miRNAs of the pre-miRNAs) were mapped to genome. The extended genome sequences from the genome loci may not form hairpins.
	gp1:Reads were mapped to miRNAs/pre-miRNAs of specific species in miRbase and the pre-miRNAs were further mapped to genome & EST.
	gp3:Reads were mapped to miRNAs/pre-miRNAs of selected species in miRbase and the mapped pre-miRNAs were not further mapped to genome, and the reads were not mapped to genome, either. but the reads were mapped to the miRNAS(Matures)
	gp4:Reads were not mapped to pre-miRNAs of selected species in miRbase. But the reads were mapped to genome & the extended genome sequences from genome may form hairpins.
SS	Secondary Structure
	Criteria:
	1.number of nucleotides in one bulge in stem: <= 12
	2.number of base pairs in the stem region of the predicted hairpin: >= 16
	3.cutoff of free energy: kCal/mol <= -15
	4.length of hairpin: up and down stems + terminal loop >= 50
	5.length of hairpin loop: <= 200
	6.number of nucleotides in one bulge in mature region: <= 4
	8.number of biased bulges in mature region: <= 2
	9.number of errors in mature region: <= 4
	10.number of base pairs in the mature region of the predicted hairpin: >= 12
	11.percent of mature in stem: >= 80
hairpinLen	pre-miRNA length
CG%	GC Content
dG	Free energy
MFEI	MFEI = -dG*100/mirLen/CG%. Reference: Cell. Mol. Life Sci. 63 (2006) 246-254.
raw	Raw data; from #reads(all),is the number of reads for isoform at 5' or 3' end.
norm	Normalized data
Expression Level	High:The number of reads in the following reported miRNAs is higher than the average copy of the data set.Medium:The number of reads in the following reported miRNAs is higher than 10 and less than average copy of the data set.Low:The number of reads in the following reported miRNAs is less than 10
Summary of known and predicted miRNA in this study.
Pre-miRNA Index	miRNA_Index	miR_name	miR_seq	len	genomeID	strand	start	end	pre-miRNA_seq	#mir/MIR	mirIDs,	rep_mirID	rep_mirSeq	rep_miRID	rep_miRSeq	type	Sequence in miRbase	group	SS	hairpinLen	CG%	dG	MFEI	MY003_T1_1(raw)	MY003_T2_1(raw)	MY003_T3_1(raw)	MY003_T4_1(raw)	MY008_T1_1(raw)	MY008_T2_1(raw)	MY008_T3_1(raw)	MY008_T4_1(raw)	MY003_T1_2(raw)	MY003_T2_2(raw)	MY003_T3_2(raw)	MY003_T4_2(raw)	MY008_T1_2(raw)	MY008_T2_2(raw)	MY008_T3_2(raw)	MY008_T4_2(raw)	MY003_T1_1(norm)	MY003_T2_1(norm)	MY003_T3_1(norm)	MY003_T4_1(norm)	MY008_T1_1(norm)	MY008_T2_1(norm)	MY008_T3_1(norm)	MY008_T4_1(norm)	MY003_T1_2(norm)	MY003_T2_2(norm)
1	1	mes-miR156a	TGACAGAAGAGAGTGAGCAC	20	comp66500_c0	+	13	97	aaacTGACAGAAGAGAGTGAGCACacagaggctaattggtataagtctatgccattgcttttgcgtgctcacttctcttctgtca	4	mes-MIR156e,mes-MIR156f,ppe-MIR156e,ptc-MIR156c,	mes-MIR156f	gaactTGACAGAAGAGAGTGAGCACacagaggcatttgtataaatctataccctttcttttgcgtgctcacttctctttctgtcagcttc	mes-miR156a	TGACAGAAGAGAGTGAGCAC	5'	Yes	gp1	....((((((((((((((((((((.(((((((....(((((((....)))))))..))))))).)))))))).))))))))))))	81	43.5	-52	1.4	13	202	1790	8909.5	54	2094	11083	7693.5	80	133	10090.5	1771	88	3640	2743	8200.5	17.3769	367.166	2913.97	9070.03	40.3679	2244.79	6904.94	4785.43	82.5095	138.301
2	2	rco-miR156e_L+1R-1	TTGACAGAAGAGAGAGAGCAC	21	comp68545_c0	+	1693	1786	aatgTTGACAGAAGAGAGAGAGCACaacccgccatcagctaaagaaaatctttacgtgttgtgggagtgtgccctttcttcttctgtcatcatc	6	rco-MIR156e,mes-MIR156k,mdm-MIR156u,mdm-MIR156v,mdm-MIR156t,mdm-MIR156w,	rco-MIR156e	aatgtTGACAGAAGAGAGAGAGCACAacccggcattaggctaaagagtctttgcctttgttgggagtgtgctctctcctcttctgtcatcatcac	rco-miR156e	TGACAGAAGAGAGAGAGCACA	5'	Diff	gp1	.(((.(((((((((((((((.(((((.(((((...((..(((((.....)))))..))..)))))..))))).))))).)))))))))).))).	92	44.7	-43.2	1	40	1360	5249	39166.5	162	18202	87946	54368.5	392	1121	89378.5	9888	552	45453	41830	39687.5	53.4675	2472.01	8544.95	39872.2	121.104	19512.8	54792.2	33817.7	404.296	1165.68
3	3	rco-miR167a_R+1	TGAAGCTGCCAGCATGATCTAA	22	comp55682_c0	+	134	238	cgtgcaccactttcagtTGAAGCTGCCAGCATGATCTAAacatacctcctttgttgaggacagattAGATCGTGTGGTAGCTTCACCtgttgttggtgtcacgaa	4	rco-MIR167b,tcc-MIR167a,vvi-MIR167e,mdm-MIR167c,	rco-MIR167b	tcagtTGAAGCTGCCAGCATGATCTAaatcttcctccctcgttgaggagagatcagatcatgtggcagtttcacccgttg	rco-miR167a	TGAAGCTGCCAGCATGATCTA	5'	Diff	gp1	(((((((((....(((.(((((((((((.((((((((((.....((((.......)))).....))))))))))))))))))))).)))....))))).))))..	103	46.7	-52.8	1.1	14064	10200	3064	2825	17166	7658	7036	10969	24106	11879	10784	913	584	37620	3253	8026	18799.2	18540.1	4987.94	2875.9	12832.5	8209.46	4383.58	6822.82	24862.2	12352.5
3	4	mdm-MIR167c-p3_1ss6AG	AGATCGTGTGGTAGCTTCACC	21	comp55682_c0	+	134	238	cgtgcaccactttcagtTGAAGCTGCCAGCATGATCTAAacatacctcctttgttgaggacagattAGATCGTGTGGTAGCTTCACCtgttgttggtgtcacgaa	4	rco-MIR167b,tcc-MIR167a,vvi-MIR167e,mdm-MIR167c,	mdm-MIR167c	tagcagtTGAAGCTGCCAGCATGATCTAaacttccctcttggtcaaggaaagatcagatcatgtggtagcttcacctgttg	mdm-MIR167c-p3	agatcatgtggtagcttcacc	3'	New	gp1	(((((((((....(((.(((((((((((.((((((((((.....((((.......)))).....))))))))))))))))))))).)))....))))).))))..	103	46.7	-52.8	1.1	536	1789	155	72	1940	700	741	831	1461	2502	471	77	67	5820	218	757	716.465	3251.78	252.327	73.2973	1450.26	750.408	461.659	516.889	1506.83	2601.73
4	5	rco-miR171c	TGATTGAGCCGTGCCAATATC	21	comp36018_c0	+	117	193	tgatgttggaatggctcaatcaaatcaaatctcccaagggcatgggtcctttagttTGATTGAGCCGTGCCAATATC	3	rco-MIR171e,mes-MIR171k,mes-MIR171g,	rco-MIR171e	ggggatgttggaatggctcaatcaaatcaaatctcccaaagttttgggtcctttaatcTGATTGAGCCGTGCCAATATCcccca	rco-miR171c	TGATTGAGCCGTGCCAATATC	3'	Yes	gp1	.((((((((.((((((((((((((..(((...((((......))))...)))..)))))))))))))).))))))))	76	44.2	-38.6	1.1	2332	859	680	650	1647	1269	1994	4476	2933	1240	4690	465	640	2613	1302	2027	3117.16	1561.37	1106.98	661.712	1231.22	1360.38	1242.3	2784.11	3025	1289.42
5	6	peu-MIR2916-p5_1ss5AG	TACCGTCCTAGTCTCAACCATA	22	comp45571_c0	-	71	162	tgggggctcgaagacgatcagaTACCGTCCTAGTCTCAACCATAaaCGATGCCGACCAGGGATTGGCGGAtgttgcttttaggactccgcca	1	peu-MIR2916,	peu-MIR2916	TGGGGACTCGAAGACGATCATATaccatcctagtctcaaccataaacgatgccgaccagggattggcggatgttgcttctaggagtccgcca	peu-MIR2916-p5	Taccatcctagtctcaaccata	5'	New	gp1	..((((((....((((.........))))..))))))..........(((.((.....)).)))((((((.(((........))))))))).	35	54.3	-25.9	0.5	2875	5486	467	1401	1111	5843	203	493	160	1006	3195	1673	2978	2353	114	1108	3842.98	9971.66	760.238	1426.24	830.533	6263.76	126.473	306.65	165.019	1046.1
5	7	peu-MIR2916-p3_2ss18TC19GA	CGATGCCGACCAGGGATCAGCGGA	24	comp45571_c0	-	71	162	tgggggctcgaagacgatcagaTACCGTCCTAGTCTCAACCATAaaCGATGCCGACCAGGGATTGGCGGAtgttgcttttaggactccgcca	1	peu-MIR2916,	peu-MIR2916	TGGGGACTCGAAGACGATCATATaccatcctagtctcaaccataaacgatgccgaccagggattggcggatgttgcttctaggagtccgcca	peu-MIR2916-p3	cgatgccgaccagggattggcgga	3'	New	gp1	..((((((....((((.........))))..))))))..........(((.((.....)).)))((((((.(((........))))))))).	35	54.3	-25.9	0.5	819	3393	1157	1256	1419	4098	317	830	203	2012	1177	1836	1111	2781	103	1171	1094.75	6167.3	1883.5	1278.63	1060.78	4393.1	197.498	516.267	209.368	2092.2
1	1	ama-miR156_L+5R-2	AAAAACTGACAGAAGAGAGTGAGC	24	comp66500_c0	+	1	117	ctctgcttgaAAAAACTGACAGAAGAGAGTGAGCacacagaggctaattggtataagtctatgccattgcttttgcgtGCTCACTTCTCTTCTGTCATTTtgctctctcccggaatt	68	ama-MIR156,har-MIR156a,dpr-MIR156b,cca-MIR156b,rco-MIR156a,rco-MIR156c,sly-MIR156d,ghr-MIR156b,ghr-MIR156a,cpa-MIR156d,tcc-MIR156b,tcc-MIR156d,tcc-MIR156f,bna-MIR156e,bra-MIR156e,bna-MIR156d,bra-MIR156c,ath-MIR156c,bra-MIR156g,bra-MIR156f,bra-MIR156a,bra-MIR156b,bra-MIR156d,lus-MIR156g,lus-MIR156a,mes-MIR156a,mes-MIR156d,mes-MIR156c,mes-MIR156g,nta-MIR156b,nta-MIR156a,nta-MIR156e,nta-MIR156d,vvi-…	ama-MIR156	tCTGACAGAAGAGAGTGAGCACatacgcaggtgattgtatgcggtgccatacctttgcagggtttgtgctcacttgtcttctgtcagt	ama-miR156	CTGACAGAAGAGAGTGAGCAC	5'	Diff	gp2a	.((((...((..(((.((((((((((((((((((((.(((((((....(((((((....)))))))..))))))).)))))))).)))))))))))).)))..)).....))))...	113	43.6	-57.1	1.1	0	21	86	482	0	184	420	155	9	35	291	511	0	125	81	232	0	38.1708	140.001	490.685	0	197.25	261.669	96.4114	9.28232	36.3951
1	2	lus-MIR156a-p3_1ss21CT	GCTCACTTCTCTTCTGTCATTT	22	comp66500_c0	+	1	117	ctctgcttgaAAAAACTGACAGAAGAGAGTGAGCacacagaggctaattggtataagtctatgccattgcttttgcgtGCTCACTTCTCTTCTGTCATTTtgctctctcccggaatt	68	ama-MIR156,har-MIR156a,dpr-MIR156b,cca-MIR156b,rco-MIR156a,rco-MIR156c,sly-MIR156d,ghr-MIR156b,ghr-MIR156a,cpa-MIR156d,tcc-MIR156b,tcc-MIR156d,tcc-MIR156f,bna-MIR156e,bra-MIR156e,bna-MIR156d,bra-MIR156c,ath-MIR156c,bra-MIR156g,bra-MIR156f,bra-MIR156a,bra-MIR156b,bra-MIR156d,lus-MIR156g,lus-MIR156a,mes-MIR156a,mes-MIR156d,mes-MIR156c,mes-MIR156g,nta-MIR156b,nta-MIR156a,nta-MIR156e,nta-MIR156d,vvi-…	lus-MIR156a	agagagagataatgggaggaggaggaggtgaggagggtgatagacTGACAGAAGAGAGTGAGCACacaaacaggcaattgtatggatggagtacctttgcggggtgcgtgctcacttctcttctgtcatctcaaattgatcttatctcctcctcctcctcctttgatcttatctcctctct	lus-MIR156a-p3	gctcacttctcttctgtcatct	3'	New	gp2a	.((((...((..(((.((((((((((((((((((((.(((((((....(((((((....)))))))..))))))).)))))))).)))))))))))).)))..)).....))))...	113	43.6	-57.1	1.1	0	0	23	59	0	9	60	138	0	0	102	177	0	9	48	142	0	0	37.4421	60.0631	0	9.6481	37.3813	85.8372	0	0
2	3	mtr-miR156h-3p_1ss8AC	GCTCTTTCTTCTTCTGTCATC	21	comp68545_c0	+	1661	1819	gagggtgaataagagagatgggtttcgagagaaatgttgacagaagagagagagcacaacccgccatcagctaaagaaaatctttacgtgttgtgggagtgtGCCCTTTCTTCTTCTGTCATCatctttgaaactctgtctcaacatttgatcaccacc	6	vvi-MIR156a,ppe-MIR156b,stu-MIR156a,gma-MIR156b,mtr-MIR156h,mtr-MIR156a,	mtr-MIR156h	tgctgTTGACAGAAGATAGAGAGCACagatgatgaaatgcatggaaggcaatggcatctcattcctttgtGCTCTTTATTCTTCTGTCATCacc	mtr-miR156h-3p	GCTCTTTATTCTTCTGTCATC	3'	Diff	gp2a	...(((((..(((.((((((((((((.(((((..((.(((((((((((((((.(((((.(((((...((..(((((.....)))))..))..)))))..))))).))))).)))))))))).)))))))))))))).)))))....)))..)))))...	153	44	-65.7	0.9	0	61	268	964	0	409	3051	1159	0	20	957	1605	21	993	2845	652	0	110.877	436.282	981.37	0	438.453	1900.84	720.908	0	20.7972
3	4	aly-miR166g-5p_2ss10TG20GT	GGAATGTTGGTTGGCTCGATG	21	comp50237_c0	+	134	268	tttgtgtatggaagtatttgaggGGAATGTTGGTTGGCTCGATGtcttcacaagaattgtcggacaaaagggttcgatcaacaagtgaagataTCGGACCAGGCTTCATTCCTCtcaaaataagtccatcatcac	157	hpe-MIR166a,crt-MIR166a,crt-MIR166b,ctr-MIR166,pvu-MIR166a,dpr-MIR166a,dpr-MIR166b,ssl-MIR166a,ssl-MIR166b,hbr-MIR166a,hbr-MIR166b,aqc-MIR166d,aqc-MIR166a,aqc-MIR166e,aqc-MIR166b,aqc-MIR166c,csi-MIR166c,csi-MIR166a,csi-MIR166e,csi-MIR166d,csi-MIR166b,rco-MIR166d,rco-MIR166c,rco-MIR166a,rco-MIR166b,rco-MIR166e,sly-MIR166c,sly-MIR166b,sly-MIR166a,ghr-MIR166b,cpa-MIR166c,cpa-MIR166a,cpa-MIR166e,cpa-…	aly-MIR166g	ggaagcgatttagggtttagaGGAATGTTGTTTGGCTCGAGGtcatggagagtaattcgttaccaaaacacaaaactctaaatgattcTCGGACCAGGCTTCATTCCCCtcaacctattttatcgcatttt	aly-miR166g-5p	GGAATGTTGTTTGGCTCGAGG	5'	Diff	gp2a	...(((.(((((..(((((((((((((((..((((((..((((((((((((.....(((((((((......)))))).)))...))))))))))))..))).))).))))))))))))).))..))))))))...	129	42.2	-61	1.1	55	38	13	15	116	43	97	49	120	47	50	0	66	117	29	39	73.5178	69.0709	21.1629	15.2703	86.7163	46.0965	60.433	30.4784	123.764	48.8734
3	5	hpe-miR166a	TCGGACCAGGCTTCATTCCCC	21	comp50237_c0	+	134	268	tttgtgtatggaagtatttgaggGGAATGTTGGTTGGCTCGATGtcttcacaagaattgtcggacaaaagggttcgatcaacaagtgaagataTCGGACCAGGCTTCATTCCTCtcaaaataagtccatcatcac	157	hpe-MIR166a,crt-MIR166a,crt-MIR166b,ctr-MIR166,pvu-MIR166a,dpr-MIR166a,dpr-MIR166b,ssl-MIR166a,ssl-MIR166b,hbr-MIR166a,hbr-MIR166b,aqc-MIR166d,aqc-MIR166a,aqc-MIR166e,aqc-MIR166b,aqc-MIR166c,csi-MIR166c,csi-MIR166a,csi-MIR166e,csi-MIR166d,csi-MIR166b,rco-MIR166d,rco-MIR166c,rco-MIR166a,rco-MIR166b,rco-MIR166e,sly-MIR166c,sly-MIR166b,sly-MIR166a,ghr-MIR166b,cpa-MIR166c,cpa-MIR166a,cpa-MIR166e,cpa-…	hpe-MIR166a	ggtagatctttcttttgtggggaatgttgtctggctcgagaccacaagaaagcttcaatctttataatctttatgttacataatcacataattgatcaatctttgttgatcaatgattaaagattagaatcttgtgttgTCGGACCAGGCTTCATTCCCCtcatgtgttcttcctt	hpe-miR166a	TCGGACCAGGCTTCATTCCCC	3'	Yes	gp2a	...(((.(((((..(((((((((((((((..((((((..((((((((((((.....(((((((((......)))))).)))...))))))))))))..))).))).))))))))))))).))..))))))))...	129	42.2	-61	1.1	6870	3988	37620	135453	27126	9179	105929	217364	22141	12902	207361	19473	6456	73702	88457	166424	9183.04	7248.81	61242.3	137894	20278.2	9839.99	65996	135202	22835.5	13416.3
4	6	dpr-miR167a_R+1	TGAAGCTGCCAGCATGATCTAG	22	comp53140_c0	+	122	269	agtctggaggggaataagTGAAGCTGCCAGCATGATCTAGccttggttagtcttagagagggaaagagtataagtatgagggagaagagaggagaaactaaccctagctaGGTCATGCTCTGGCAGCCTCACTccttccctttgggga	65	dpr-MIR167b,ahy-MIR167,cca-MIR167,csi-MIR167c,csi-MIR167b,lja-MIR167c,lja-MIR167a,lja-MIR167b,rco-MIR167a,rco-MIR167c,ghr-MIR167a,cpa-MIR167a,cpa-MIR167b,cpa-MIR167c,tcc-MIR167b,tcc-MIR167c,bna-MIR167c,bra-MIR167a,lus-MIR167h,lus-MIR167c,lus-MIR167d,lus-MIR167a,lus-MIR167g,lus-MIR167b,lus-MIR167i,lus-MIR167f,mes-MIR167c,mes-MIR167g,mes-MIR167h,mes-MIR167a,nta-MIR167a,nta-MIR167c,nta-MIR167b,vvi-M…	dpr-MIR167b	tctagaaaggaacaagTGAAGCTGCCAGCATGATCTAtcttgggatggttttggatatgagagtactaaccctagctaggtcatgctgtagcagcatcacttcttcctctttggg	dpr-miR167a	TGAAGCTGCCAGCATGATCTA	5'	Diff	gp2a	..((..(((((((...(((((.(((((((((((((((((((...((((((((((.............(((....)))..............))))..))))))...)))))))))))))..)))))).)))))..)))))))..))..	144	49.3	-62.8	0.9	907.5	306	3317.5	7005	890.5	1866	21923.5	17167	2377	468	23326	912	147	4400.5	10649	11624.5	1213.04	556.202	5400.62	7131.22	665.697	2000.37	13658.8	10678	2451.56	486.654
4	7	aly-miR167b-3p_1ss13AG	GGTCATGCTCTGGCAGCCTCACT	23	comp53140_c0	+	122	269	agtctggaggggaataagTGAAGCTGCCAGCATGATCTAGccttggttagtcttagagagggaaagagtataagtatgagggagaagagaggagaaactaaccctagctaGGTCATGCTCTGGCAGCCTCACTccttccctttgggga	65	dpr-MIR167b,ahy-MIR167,cca-MIR167,csi-MIR167c,csi-MIR167b,lja-MIR167c,lja-MIR167a,lja-MIR167b,rco-MIR167a,rco-MIR167c,ghr-MIR167a,cpa-MIR167a,cpa-MIR167b,cpa-MIR167c,tcc-MIR167b,tcc-MIR167c,bna-MIR167c,bra-MIR167a,lus-MIR167h,lus-MIR167c,lus-MIR167d,lus-MIR167a,lus-MIR167g,lus-MIR167b,lus-MIR167i,lus-MIR167f,mes-MIR167c,mes-MIR167g,mes-MIR167h,mes-MIR167a,nta-MIR167a,nta-MIR167c,nta-MIR167b,vvi-M…	aly-MIR167b	atctgcacaacttgttgctcaggtattttgaagacaagtccacaagggaacaagTGAAGCTGCCAGCATGATCTAtctttggttaagagatgaatgtgtaaacatattgcttaaacccaagctaGGTCATGCTCTGACAGCCTCACTccttcctggtttaggaccattcactgataaagcattccacatgccgat	aly-miR167b-3p	GGTCATGCTCTGACAGCCTCACT	3'	Diff	gp2a	..((..(((((((...(((((.(((((((((((((((((((...((((((((((.............(((....)))..............))))..))))))...)))))))))))))..)))))).)))))..)))))))..))..	144	49.3	-62.8	0.9	13	26	199	97	67	87	508	89	46	29	592	62	19	251	282	274	17.3769	47.259	323.956	98.7478	50.0862	93.265	316.495	55.3588	47.443	30.1559
5	8	ccl-miR167a	TGAAGCTGCCAGCATGATCTGA	22	comp55682_c0	+	130	240	ttatcgtgcaccactttcagtTGAAGCTGCCAGCATGATCTAAacatacctcctttgttgaggacagATTAGATCGTGTGGTAGCTTCACCtgttgttggtgtcacgaaaa	48	ccl-MIR167b,ccl-MIR167a,ctr-MIR167,gso-MIR167a,dpr-MIR167c,cca-MIR167,csi-MIR167c,csi-MIR167a,lja-MIR167,rco-MIR167c,cpa-MIR167d,bna-MIR167a,bra-MIR167b,bra-MIR167c,bna-MIR167b,bra-MIR167d,bna-MIR167c,bra-MIR167a,bna-MIR167d,lus-MIR167d,lus-MIR167g,lus-MIR167i,lus-MIR167f,mes-MIR167d,mes-MIR167f,mes-MIR167a,mes-MIR167e,nta-MIR167d,nta-MIR167a,nta-MIR167c,nta-MIR167b,vvi-MIR167b,vvi-MIR167a,ppe-MI…	ccl-MIR167a	catattcgtgcactagtagtagtTGAAGCTGCCAGCATGATCTGAactttccttgacctccatctctagggaaaggccagatcatctggcagtttcacctattgatggtagcatggccaga	ccl-miR167a	TGAAGCTGCCAGCATGATCTGA	5'	Yes	gp2a	...((((((((((....(((.(((((((((((.((((((((((.....((((.......)))).....))))))))))))))))))))).)))....))))).)))))...	105	44.1	-54.4	1.1	153.5	99	282.5	285	212.5	451	944.5	611	271	102	931	117	79	1009.5	424	1122.5	205.182	179.948	459.887	290.135	158.855	483.477	588.443	380.048	279.501	106.066
5	9	nta-MIR167d-p3_1ss9AG	ATTAGATCGTGTGGTAGCTTCACC	24	comp55682_c0	+	130	240	ttatcgtgcaccactttcagtTGAAGCTGCCAGCATGATCTAAacatacctcctttgttgaggacagATTAGATCGTGTGGTAGCTTCACCtgttgttggtgtcacgaaaa	48	ccl-MIR167b,ccl-MIR167a,ctr-MIR167,gso-MIR167a,dpr-MIR167c,cca-MIR167,csi-MIR167c,csi-MIR167a,lja-MIR167,rco-MIR167c,cpa-MIR167d,bna-MIR167a,bra-MIR167b,bra-MIR167c,bna-MIR167b,bra-MIR167d,bna-MIR167c,bra-MIR167a,bna-MIR167d,lus-MIR167d,lus-MIR167g,lus-MIR167i,lus-MIR167f,mes-MIR167d,mes-MIR167f,mes-MIR167a,mes-MIR167e,nta-MIR167d,nta-MIR167a,nta-MIR167c,nta-MIR167b,vvi-MIR167b,vvi-MIR167a,ppe-MI…	nta-MIR167d	cactatcagtTGAAGCTGCCAGCATGATCTAaacttacctcttgtaataattaagtttgagggaagattagatcatgtggtagcttcacccgttagttg	nta-MIR167d-p3	attagatcatgtggtagcttcacc	3'	New	gp2a	...((((((((((....(((.(((((((((((.((((((((((.....((((.......)))).....))))))))))))))))))))).)))....))))).)))))...	105	44.1	-54.4	1.1	292	265	17	9	656	129	37	40	391	543	30	24	11	312	10	36	390.313	481.679	27.6746	9.16216	490.396	138.289	23.0518	24.8804	403.265	564.643
6	10	vun-miR169	CAGCCAAGGATGACTTGCCGG	21	comp64271_c0	+	12	167	tcaccaagagggtcttacttgaggaggtagagagtttgatgCAGCCAAGGATGACTTGCCGGcccaacagcaccagtgtgggagatgggtactttccGGCAAGTTGTCTTTGGCTACAtgagtctctctttctctcaagtaagaccttaatggcat	101	vun-MIR169,aqc-MIR169c,rco-MIR169b,rco-MIR169a,sly-MIR169a,sly-MIR169c,ghr-MIR169b,tcc-MIR169b,tcc-MIR169k,tcc-MIR169l,tcc-MIR169e,tcc-MIR169m,tcc-MIR169c,tcc-MIR169a,bna-MIR169n,bna-MIR169b,bna-MIR169a,lus-MIR169f,lus-MIR169j,lus-MIR169h,lus-MIR169l,lus-MIR169g,mes-MIR169c,mes-MIR169e,mes-MIR169b,mes-MIR169d,mes-MIR169a,mes-MIR169g,mes-MIR169f,nta-MIR169r,nta-MIR169q,nta-MIR169s,nta-MIR169e,nta-…	vun-MIR169	aacagagagtgatgCAGCCAAGGATGACTTGCCGGcgttatgctgcatgatgctttttacggcgactttgccggcaagtggttcttggctacgtttggctcttttcttct	vun-miR169	CAGCCAAGGATGACTTGCCGG	5'	Yes	gp2a	...(((..(((((((((((((((.((..((((((..(.(((.(((((((((..(((((((((((((......((.....))....))))......)))))))))..))))))))).))).)..))))))..)))))))))))))))))..)))...	150	49.4	-83.8	1.1	9	165	0	0	11	73	0	39	32	86	0	0	0	547	0	0	12.0302	299.913	0	0	8.2231	78.2568	0	24.2584	33.0038	89.4278
6	11	aly-miR169b-3p_2ss12C-15CT	GGCAAGTTGTCTTTGGCTACA	21	comp64271_c0	+	12	167	tcaccaagagggtcttacttgaggaggtagagagtttgatgCAGCCAAGGATGACTTGCCGGcccaacagcaccagtgtgggagatgggtactttccGGCAAGTTGTCTTTGGCTACAtgagtctctctttctctcaagtaagaccttaatggcat	101	vun-MIR169,aqc-MIR169c,rco-MIR169b,rco-MIR169a,sly-MIR169a,sly-MIR169c,ghr-MIR169b,tcc-MIR169b,tcc-MIR169k,tcc-MIR169l,tcc-MIR169e,tcc-MIR169m,tcc-MIR169c,tcc-MIR169a,bna-MIR169n,bna-MIR169b,bna-MIR169a,lus-MIR169f,lus-MIR169j,lus-MIR169h,lus-MIR169l,lus-MIR169g,mes-MIR169c,mes-MIR169e,mes-MIR169b,mes-MIR169d,mes-MIR169a,mes-MIR169g,mes-MIR169f,nta-MIR169r,nta-MIR169q,nta-MIR169s,nta-MIR169e,nta-…	aly-MIR169b	gtgcccaacggagtagaattgcatgaagtggagtagagtataatgCAGCCAAGGATGACTTGCCGGaacgttgttaatcatacgtataaattatgtgatgaacatatttctGGCAAGTTGTCCTTCGGCTACAttttgctctcttcttctcatgcaaactctctttgggatat	aly-miR169b-3p	GGCAAGTTGTCCTTCGGCTACA	3'	Diff	gp2a	...(((..(((((((((((((((.((..((((((..(.(((.(((((((((..(((((((((((((......((.....))....))))......)))))))))..))))))))).))).)..))))))..)))))))))))))))))..)))...	150	49.4	-83.8	1.1	14	613	0	0	34	163	0	31	15	109	9	0	8	365	0	0	18.7136	1114.22	0	0	25.4169	174.738	0	19.2823	15.4705	113.345
7	12	crt-miR171_R+2	TGATTGAGCCGTGCCAATATCCA	23	comp36018_c0	+	114	197	tgatgatgttggaatggctcaatcaaatcaaatctcccaagggcatgggtcctttagttTGATTGAGCCGTGCCAATATCAAag	83	crt-MIR171,bol-MIR171a,bna-MIR171d,htu-MIR171a,htu-MIR171b,htu-MIR171c,ssl-MIR171a,aqc-MIR171b,aqc-MIR171a,aqc-MIR171d,lja-MIR171a,rco-MIR171b,rco-MIR171a,rco-MIR171f,rco-MIR171d,rco-MIR171e,sly-MIR171a,cpa-MIR171b,cpa-MIR171a,cpa-MIR171d,tcc-MIR171g,tcc-MIR171f,tcc-MIR171d,tcc-MIR171h,tcc-MIR171e,bna-MIR171e,bna-MIR171c,bra-MIR171c,bna-MIR171a,bra-MIR171b,bna-MIR171b,bra-MIR171d,bra-MIR171a,lus-…	crt-MIR171	aatatgacaggaatatgcaggatgctggaatcttgtttcctatcttttgggggttaaaatgaagattgtggtgaccattttggaggatggatgggtacaacgggatattggtgcggttcaataagaaaacggtgctcaatactttttgagctccgcttttTGATTGAGCCGTGCCAATATCacgtgccactcgctctctaa	crt-miR171	TGATTGAGCCGTGCCAATATC	3'	Diff	gp2a	...(((((((((.((((((((((((((..(((...((((......))))...)))..)))))))))))))).)))))))))...	78	42.9	-41	1.1	30	0	0	0	0	0	0	17	0	0	9	37	0	0	0	0	40.1006	0	0	0	0	0	0	10.5742	0	0
8	13	mdm-MIR391-p5_2ss16CT20GA	ACGCAGGAGAGATGATGCCAA	21	comp768815_c0	+	1	158	ggaagacgatgatgatttcctgcattgaaaggtttgccACGCAGGAGAGATGATGCCAActtacaagccatttttagaatgagatggctggtgcgttggcatcattgatcctgcgtagcaaacctttgcaagtgcgctaaaaaaaaatccattcttga	3	sly-MIR4376,mdm-MIR391,stu-MIR4376,	mdm-MIR391	gggaggttcgcTACGCAGGAGAGATGACGCCGacagtcatgttcttagtattaggattagaacgacggcgtcatctctcctgcataggaaaccttgc	mdm-MIR391-p5	ACGCAGGAGAGATGACGCCGa	5'	New	gp2a	((((...(((.....(((..(((((((((((((((((.((((((((..((((((((((((..((.(((((((((......))))))))).))..))))))))))))..)))))))).)))))))))).))).))))..))).....)))..))))...	155	43.7	-74.4	1.1	67	91	0	0	168	128	0	0	159	498	0	0	525	12	0	0	89.5581	165.407	0	0	125.589	137.217	0	0	163.988	517.85
9	14	ama-miR396-5p_1ss21TG	TTCCACAGCTTTCTTGAACTG	21	comp376246_c0	+	111	251	gatgatcctctttgtattcTTCCACAGCTTTCTTGAACTGcatccgatcgcatcatcctcactcttgcaaatttaggtatcaaaaggccgttcaatcgttgcaGTTCAATAAAGCTGTGGGAAGatacagagagggtcaaa	76	ama-MIR396,amg-MIR396,bcy-MIR396a,bcy-MIR396b,bgy-MIR396b,bgy-MIR396a,ccl-MIR396,aau-MIR396,dpr-MIR396,ssl-MIR396,hbr-MIR396b,aqc-MIR396a,aqc-MIR396b,cca-MIR396a,cca-MIR396c,csi-MIR396a,csi-MIR396b,csi-MIR396c,lja-MIR396,rco-MIR396,sly-MIR396a,sly-MIR396b,ghr-MIR396b,ghr-MIR396a,cpa-MIR396,tcc-MIR396b,tcc-MIR396a,tcc-MIR396c,tcc-MIR396e,bna-MIR396a,bra-MIR396,lus-MIR396c,lus-MIR396a,lus-MIR396e,l…	ama-MIR396	gctaTTCCACAGCTTTCTTGAACTTtcttgaactgctttttataatttttgtatatagcaccatacatggAAGCTCAAGAAAGCTGTGGGAaaac	ama-miR396-5p	TTCCACAGCTTTCTTGAACTT	5'	Diff	gp2a	..(((((((((((((((..((((((((((((.((((((((((..((((.(((.............))).......(((........))).....)))).)))))))))).))))))))))))..)))))))))))))))..	137	42.6	-67.8	1.1	293.5	221	17	53.5	618	869	133.5	92	642.5	1502.5	125.5	97.5	1057.5	1861.5	89.5	106.5	392.318	401.702	27.6746	54.464	461.989	931.578	83.1733	57.2248	662.654	1562.39
9	15	cca-miR396a-3p_2ss7GT21AG	GTTCAATAAAGCTGTGGGAAG	21	comp376246_c0	+	111	251	gatgatcctctttgtattcTTCCACAGCTTTCTTGAACTGcatccgatcgcatcatcctcactcttgcaaatttaggtatcaaaaggccgttcaatcgttgcaGTTCAATAAAGCTGTGGGAAGatacagagagggtcaaa	76	ama-MIR396,amg-MIR396,bcy-MIR396a,bcy-MIR396b,bgy-MIR396b,bgy-MIR396a,ccl-MIR396,aau-MIR396,dpr-MIR396,ssl-MIR396,hbr-MIR396b,aqc-MIR396a,aqc-MIR396b,cca-MIR396a,cca-MIR396c,csi-MIR396a,csi-MIR396b,csi-MIR396c,lja-MIR396,rco-MIR396,sly-MIR396a,sly-MIR396b,ghr-MIR396b,ghr-MIR396a,cpa-MIR396,tcc-MIR396b,tcc-MIR396a,tcc-MIR396c,tcc-MIR396e,bna-MIR396a,bra-MIR396,lus-MIR396c,lus-MIR396a,lus-MIR396e,l…	cca-MIR396c	gccatgtttTTCCACAGCTTTCTTGAACTTtaaaaattcatgtgttaattccgttctcaagaattccttttcgagaattcacgtgattaaacgaaGTTCAAGAAAGCTGTGGGAAAacatgaca	cca-miR396a-3p	GTTCAAGAAAGCTGTGGGAAA	3'	Diff	gp2a	..(((((((((((((((..((((((((((((.((((((((((..((((.(((.............))).......(((........))).....)))).)))))))))).))))))))))))..)))))))))))))))..	137	42.6	-67.8	1.1	55	38	0	0	77	558	0	0	145	280	0	0	387	148	0	0	73.5178	69.0709	0	0	57.5617	598.182	0	0	149.548	291.16
10	16	ama-miR396-5p	TTCCACAGCTTTCTTGAACTT	21	comp45930_c0	+	20	171	ttaagagaattctgtgcaagtcctgccatgcttTTCCACAGCTTTCTTGAACTTccatatctattgttcttaattttgttttctagaaatagatcaactgtggaaGCTCAAGAAAGCTGTGGGAAGacatggcagttcaggacttctttgcc	76	ama-MIR396,amg-MIR396,bcy-MIR396b,bgy-MIR396b,bcy-MIR396a,bgy-MIR396a,ccl-MIR396,aau-MIR396,dpr-MIR396,ssl-MIR396,hbr-MIR396a,hbr-MIR396b,aqc-MIR396b,aqc-MIR396a,cca-MIR396a,cca-MIR396c,csi-MIR396c,csi-MIR396a,csi-MIR396b,lja-MIR396,rco-MIR396,sly-MIR396b,sly-MIR396a,ghr-MIR396b,ghr-MIR396a,cpa-MIR396,tcc-MIR396c,tcc-MIR396e,tcc-MIR396b,tcc-MIR396a,bna-MIR396a,bra-MIR396,lus-MIR396e,lus-MIR396b,l…	ama-MIR396	gctaTTCCACAGCTTTCTTGAACTTtcttgaactgctttttataatttttgtatatagcaccatacatggAAGCTCAAGAAAGCTGTGGGAaaac	ama-miR396-5p	TTCCACAGCTTTCTTGAACTT	5'	Yes	gp2a	...(((((((((((........((((((((..((((((((((((((((((.((((((((...((((....)))).......((((....)))).....)))))))).))))))))))))))))))..))))))))..))))).))))))...	146	39.5	-65.8	1.1	159	108.5	17	45.5	428	216	133.5	66.5	329.5	313.5	95.5	61	751	1008.5	89.5	102.5	212.533	197.216	27.6746	46.3198	319.953	231.554	83.1733	41.3636	339.836	325.996
10	17	ama-miR396-3p_L-2R+2	GCTCAAGAAAGCTGTGGGAAG	21	comp45930_c0	+	20	171	ttaagagaattctgtgcaagtcctgccatgcttTTCCACAGCTTTCTTGAACTTccatatctattgttcttaattttgttttctagaaatagatcaactgtggaaGCTCAAGAAAGCTGTGGGAAGacatggcagttcaggacttctttgcc	76	ama-MIR396,amg-MIR396,bcy-MIR396b,bgy-MIR396b,bcy-MIR396a,bgy-MIR396a,ccl-MIR396,aau-MIR396,dpr-MIR396,ssl-MIR396,hbr-MIR396a,hbr-MIR396b,aqc-MIR396b,aqc-MIR396a,cca-MIR396a,cca-MIR396c,csi-MIR396c,csi-MIR396a,csi-MIR396b,lja-MIR396,rco-MIR396,sly-MIR396b,sly-MIR396a,ghr-MIR396b,ghr-MIR396a,cpa-MIR396,tcc-MIR396c,tcc-MIR396e,tcc-MIR396b,tcc-MIR396a,bna-MIR396a,bra-MIR396,lus-MIR396e,lus-MIR396b,l…	ama-MIR396	gctaTTCCACAGCTTTCTTGAACTTtcttgaactgctttttataatttttgtatatagcaccatacatggAAGCTCAAGAAAGCTGTGGGAaaac	ama-miR396-3p	AAGCTCAAGAAAGCTGTGGGA	3'	Diff	gp2a	...(((((((((((........((((((((..((((((((((((((((((.((((((((...((((....)))).......((((....)))).....)))))))).))))))))))))))))))..))))))))..))))).))))))...	146	39.5	-65.8	1.1	19	0	0	0	79	28	78	0	38	90	0	0	158	169	22	0	25.3971	0	0	0	59.0568	30.0163	48.5956	0	39.192	93.5873
11	18	amg-miR396	TTCCACAGCTTTCTTGAACTG	21	comp36510_c0	+	116	236	aaatgaccctctttgtatttTTCCACAGCTTTCTTGAACTGcattagtgaaatcttaatttttttatgattcaattgttgcggttcagtgaagctgtggaaagatatagatagggtcaagc	34	amg-MIR396,bcy-MIR396a,bgy-MIR396a,aau-MIR396,dpr-MIR396,ssl-MIR396,hbr-MIR396b,aqc-MIR396a,csi-MIR396a,csi-MIR396b,lja-MIR396,sly-MIR396a,ghr-MIR396b,ghr-MIR396a,cpa-MIR396,tcc-MIR396b,tcc-MIR396a,lus-MIR396c,lus-MIR396a,mes-MIR396a,mes-MIR396b,nta-MIR396a,vvi-MIR396d,vvi-MIR396c,aly-MIR396a,mdm-MIR396b,ath-MIR396a,ptc-MIR396b,ptc-MIR396a,gma-MIR396i,gma-MIR396e,gma-MIR396a,gma-MIR396h,mtr-MIR39…	amg-MIR396	ctatggctctctctgtattcTTCCACAGCTTTCTTGAACTGcatcgatcgaagaaagagcaagctttgttctctcttacatgcatgccaaatcgtcttcttgcggttcaataaagctgtgggaagatacagatagggtcaaccac	amg-miR396	TTCCACAGCTTTCTTGAACTG	5'	Yes	gp2a	...(((((((.((((((((((((((((((((..((((((((((..(((..((((.(((.....))).))))..)))..))))))))))..)))))))))))))))))))).)))))))...	115	34.7	-61.3	1.5	293.5	221	17	53.5	618	869	133.5	92	642.5	1502.5	125.5	97.5	1057.5	1861.5	89.5	106.5	392.318	401.702	27.6746	54.464	461.989	931.578	83.1733	57.2248	662.654	1562.39
12	19	hbr-miR398_2ss9CT21GC	GGAGCGACTTGAGATCACATC	21	comp48901_c0	+	1	111	tgtggataggtctaacaGGAGCGACTTGAGATCACATCaaggtgcatttgatcttactgtatgcttgatgaTGTGTTCTCAGGTCGCCCCTGtaagacttcctttcactat	45	bol-MIR398a,ssl-MIR398,ahy-MIR398,hbr-MIR398,aqc-MIR398b,aqc-MIR398a,cca-MIR398,csi-MIR398,rco-MIR398b,rco-MIR398a,ghr-MIR398,cpa-MIR398,tcc-MIR398a,tcc-MIR398b,bra-MIR398,lus-MIR398a,lus-MIR398b,lus-MIR398e,lus-MIR398d,lus-MIR398c,nta-MIR398,vvi-MIR398b,vvi-MIR398c,vvi-MIR398a,ppe-MIR398a,aly-MIR398a,aly-MIR398b,mdm-MIR398c,mdm-MIR398b,mdm-MIR398a,stu-MIR398b,gra-MIR398,ath-MIR398b,ath-MIR398a,a…	hbr-MIR398	gtggagaattcctacaGGAGCGACCTGAGATCACATGtggccaccctcacatattcccttatcttctattggttgtgttttcgtgtgttctcaggtcacccctgccgggctttcctcccctgctagattggtatgatgat	hbr-miR398	GGAGCGACCTGAGATCACATG	5'	Diff	gp2a	.(((((.((((((.(((((.(((((((((((.(((((((....((((.............))))....))))))).))))))))))).))))).))))))...)))))...	107	44.1	-52.7	1.1	0	0	0	0	26	28	10	0	10	10	0	0	162	18	0	0	0	0	0	0	19.4364	30.0163	6.23021	0	10.3137	10.3986
12	20	aqc-MIR398b-p3_1ss11GA	TGTGTTCTCAAGTCGCCCCTG	21	comp48901_c0	+	1	111	tgtggataggtctaacaGGAGCGACTTGAGATCACATCaaggtgcatttgatcttactgtatgcttgatgaTGTGTTCTCAGGTCGCCCCTGtaagacttcctttcactat	45	bol-MIR398a,ssl-MIR398,ahy-MIR398,hbr-MIR398,aqc-MIR398b,aqc-MIR398a,cca-MIR398,csi-MIR398,rco-MIR398b,rco-MIR398a,ghr-MIR398,cpa-MIR398,tcc-MIR398a,tcc-MIR398b,bra-MIR398,lus-MIR398a,lus-MIR398b,lus-MIR398e,lus-MIR398d,lus-MIR398c,nta-MIR398,vvi-MIR398b,vvi-MIR398c,vvi-MIR398a,ppe-MIR398a,aly-MIR398a,aly-MIR398b,mdm-MIR398c,mdm-MIR398b,mdm-MIR398a,stu-MIR398b,gra-MIR398,ath-MIR398b,ath-MIR398a,a…	aqc-MIR398b	gggggtaacatgagaatacatgaaatagatactatcagagagtcattccattgtagtatcagtttcttccaTGTGTTCTCAGGTCGCCCCTGc	aqc-MIR398b-p3	TGTGTTCTCAGGTCGCCCCTG	3'	New	gp2a	.(((((.((((((.(((((.(((((((((((.(((((((....((((.............))))....))))))).))))))))))).))))).))))))...)))))...	107	44.1	-52.7	1.1	67	20	8	16	26	9	0	0	367	142	509	0	19	115	0	0	89.5581	36.3531	13.0233	16.2883	19.4364	9.6481	0	0	378.512	147.66
13	21	stu-miR482a-5p_2ss3AG12AC	GGGATTGGTGGCTTGGAAAGC	21	LJSB229F	-	425	593	ttgggaagtgatgagaaacgggggatgaatatttgccgaaaatctttgGGGATTGGTGGCTTGGAAAGCtttgttcttttctcttttgaatgaatttaatggcTTTCCAAGTCCACCCCTTCCTAttgttttcggtcttctctctcccttttcttctttcgcttcttca	4	sly-MIR482a,nta-MIR482a,nta-MIR482c,stu-MIR482a,	stu-MIR482a	gagtttttcgaaaatctatgGGAATTGGTGGATTGGAAAGCttttattttcttctgattagcTTTCCAATTCCACCCATTCCTAtggtttttcggtatcctctc	stu-miR482a-5p	GGAATTGGTGGATTGGAAAGC	5'	Diff	gp2a	...((((((((.((((((.((((((.((......(((((((((...((((((..((((((((((((((((..((((..(((......))).)))).....))))))))))).)))))..))))))..)))))))))....)))))))).))))))...))))))))...	163	41.4	-73.9	1.1	176	678	287	377	403	614	528	900	261	551	409	84	1184	1161	195	1031	235.257	1232.37	467.213	383.793	301.264	658.215	328.955	559.808	269.187	572.962
13	22	sly-miR482a_1ss8TG	TTTCCAAGTCCACCCATTCCTA	22	LJSB229F	-	425	593	ttgggaagtgatgagaaacgggggatgaatatttgccgaaaatctttgGGGATTGGTGGCTTGGAAAGCtttgttcttttctcttttgaatgaatttaatggcTTTCCAAGTCCACCCCTTCCTAttgttttcggtcttctctctcccttttcttctttcgcttcttca	4	sly-MIR482a,nta-MIR482a,nta-MIR482c,stu-MIR482a,	sly-MIR482a	cgaaaatctatggggattggtgagttggaaagcttttctttttcttctcttgtgattagcTTTCCAATTCCACCCATTCCTAtggtttttcg	sly-miR482a	TTTCCAATTCCACCCATTCCTA	3'	Diff	gp2a	...((((((((.((((((.((((((.((......(((((((((...((((((..((((((((((((((((..((((..(((......))).)))).....))))))))))).)))))..))))))..)))))))))....)))))))).))))))...))))))))...	163	41.4	-73.9	1.1	2645	1619	5400	8048	4561	4408	4320	19910	3545	4288	12355	2238	1568	9570	3609	8915	3535.54	2942.78	8790.76	8193.01	3409.6	4725.43	2691.45	12384.2	3656.2	4458.91
14	23	gso-miR482a_R+1_2ss5CA10CG	TCTTACCTAGACCTCCCATACC	22	comp23388_c0	+	1	177	tgggaaagagggaaagagagatagatatggaggaagttgtgggtatggggggtttggcatgataaagtttttgagttttgatttgataaaaatctcaaaaaaacaaaaaacaaaTCTTGCCTAGACCTCCCATACCaatgatttccttctatcctccccttcccttccttttcctta	8	gso-MIR482b,gso-MIR482a,sly-MIR482b,stu-MIR482d,gma-MIR482d,gma-MIR482e,gma-MIR482b,mtr-MIR482,	gso-MIR482a	ggggaaggcatgggtatggggggattgggaaggaatatccataagcaaaatatgctattTCTTCCCTACACCTCCCATACcactgtttttcct	gso-miR482a	TCTTCCCTACACCTCCCATAC	3'	Diff	gp2a	.(((((((((((((.(((.((((((.....(((((((..(.((((((((((((((((((.(((...((((((..(((((..(((((........)))))))))).))))))..))).)))).)))))))))))))).)..))))))))))))))))...))))))..)))))))...	173	38.4	-77.1	1.1	64	31	8	0	0	34	0	0	8	0	0	0	0	111	0	0	85.548	56.3473	13.0233	0	0	36.4484	0	0	8.25095	0
15	24	ptc-MIR482d-p3_2ss12AG21CT	CCACCCATGCCGATGATTTCTT	22	comp66038_c0	+	205	396	aaaaaattacatgtagatagagagaggaataagagggaaagggaggcagatctgcacgaagttattggcagggtgatcctgggaaagaaagagttgtgttttagatcttttccaagaCCACCCATGCCGATGATTTCTTgcagatcctccctttccctaacttgtcctatttagatctaatcttaatttatg	5	pgi-MIR482b,pgi-MIR482a,mdm-MIR482b,mdm-MIR482d,ptc-MIR482d,	ptc-MIR482d	agagaagaggggaaagagatggaggacgaggaagtttctGGACATGGGTTGGTTTGCAAGAaaataagatttttgaactctctgatattgttcatggaaaacagttttcTTGCCGACCCCACCCATGCCAAtgatttcctcagcttcctctctctccctgtttccttctct	ptc-MIR482d-p3	CCACCCATGCCAAtgatttcct	3'	New	gp2a	...((((((....(((((..(((.(((.((((((((((((((((((...(((((((.((((((((((((((((((.((.(((((((((..(((......)))...))))))))).)).))))).))))))))))))).))))))))))))))))))))..)))))))).)))..)))))....))))))...	186	40.1	-91.3	1.2	0	0	15	13	0	0	19	21	8	19	69	0	0	11	21	0	0	0	24.4188	13.2342	0	0	11.8374	13.0622	8.25095	19.7573
16	25	ath-MIR5645e-p3_1ss18TA	AAAACGACGTCGTTTTGAGT	20	comp53022_c0	+	375	510	tttggtacctcaaaattttgtgacttaaatggctcaaatttatcaaaacgacgtcgttttacgctcatttatactcAAAACGACGTCGTTTTGAGTgatttgagccatttgaaccacaaaattttgagatacctaa	1	ath-MIR5645e,	ath-MIR5645e	taaatgacaaagtttatgttgacttttcATTTGAGTCATGTCGTTAAGtaggttaatataattatttcccggcgttaagttctcgtttatctcctctattagaacaaaacaacattgtttattgcatctcgttttgtctgttgaaacaaatttaaaccctaaatccccaaatcgatttcattatctgcgattttgaggtcaggtgggtttgtgattttgagataatgaaatcgatatagggatttaaggtttatatttgtttcaagagacaaaacgacgtcgttttgtgtcttcaataaacgacattgtttgttctaacagatcaaataaacaagtcattaaagccgtaaaaaaaattatattaacctatttaacgataggactcaaatggcaagtcaa…	ath-MIR5645e-p3	aaaacgacgtcgttttgtgt	3'	New	gp2a	...((((.((((((((((((((..((((((((((((((((..((((((((((((((((((................))))))))))))))))))..))))))))))))))))..)))))))))))))).))))...	130	33.8	-71	1.5	0	0	0	8	0	0	10	22	0	0	0	0	0	0	12	17	0	0	0	8.14415	0	0	6.23021	13.6842	0	0
17	26	nta-MIR6149a-p5_2ss18CT21TA	ATACGCACCTGAATCGGTAGA	21	comp44647_c0	+	48	198	atcctaagttcattttgtgcgtcaaagcttgcATACGCACCTGAATCGGTAGAtagagaaaaagatcaacaactctatttatgttactctttatatgtgccgatttgggttcgtatgcatgccatggcgtactgaaaaaccaacttagaag	1	nta-MIR6149a,	nta-MIR6149a	atgtcaaagcTTGATACGCACCTGAATCGGCagttacatacagaccaatagtatattagtacatatgccggtttgggttcgtatcaaactatgatatac	nta-MIR6149a-p5	ATACGCACCTGAATCGGCagt	5'	New	gp2a	...(((((((..((((((((((((..((.((((((((.(((..((((((((.(((.....(((((..((((..........))))..))))).))).))))))))..))).)))))))).))..))))))))...))))..)))))))...	145	39.1	-58.4	1	254	135	0	38	311	173	0	159	377	286	39	16	567	354	0	19	339.519	245.383	0	38.6847	232.489	185.458	0	98.8994	388.826	297.4
1	1	han-miR156a_L+1	ATGACAGAAGAGAGTGAGCAC	21	comp29520_c0	-	186	307	atatgttcgggggttgagtcatcggaattccagatgaatgactcgaagaattctgtgattgagATGACAGAAGAGAGAGAGCACgaccagagtctgaaatccctgatagcccttgaacagtt	3	han-MIR156a,gma-MIR156w,mtr-MIR156a,	han-MIR156a	gatcagatatagatagaaaTGACAGAAGAGAGTGAGCACacaaagccgaattgtaccgaagtgacttgttgtatgattgatttgggtgctcactgctctatctgtcatcttcattcttaatcatctc	han-miR156a	TGACAGAAGAGAGTGAGCAC	3'	Diff	gp2b	...(((((..(((((..((((..(((.((.(((((...((.(((......((((((.((....)).))))))......)))))........))))))).))).)))))))))..)))))...	116	45.1	-36.8	0.7	0	11.5	31	191	0	78	264	210	0	0	144.5	27.5	0	152.5	55	238	0	20.903	50.4655	194.441	0	83.6169	164.478	130.622	0	0
2	1	han-miR156a_L+1	ATGACAGAAGAGAGTGAGCAC	21	comp56544_c0	-	888	938	caatctcccgagtttcagctggcggcgctgATGACAGAAGAGAGAGAGCAC	86	bcy-MIR156,bgy-MIR156,han-MIR156a,han-MIR156c,bol-MIR157a,vun-MIR156b,ahy-MIR156b,hbr-MIR156,aqc-MIR156a,aqc-MIR156b,cca-MIR156c,rco-MIR156h,rco-MIR156f,rco-MIR156g,sly-MIR156a,sly-MIR156c,sly-MIR156b,cpa-MIR156e,cpa-MIR156f,tcc-MIR156f,tcc-MIR156e,bna-MIR156b,bna-MIR156c,bna-MIR156g,bra-MIR157a,lus-MIR156i,lus-MIR156b,lus-MIR156c,lus-MIR156f,lus-MIR156e,lus-MIR156h,mes-MIR156i,mes-MIR156h,mes-MI…	han-MIR156a	gatcagatatagatagaaaTGACAGAAGAGAGTGAGCACacaaagccgaattgtaccgaagtgacttgttgtatgattgatttgggtgctcactgctctatctgtcatcttcattcttaatcatctc	han-miR156a	TGACAGAAGAGAGTGAGCAC	3'	Diff	gp2b	...((((....((((((((.......))))).)))....))))........	40	56.9	-10.7	0.4	0	11.5	31	191	0	78	264	210	0	0	144.5	27.5	0	152.5	55	238	0	20.903	50.4655	194.441	0	83.6169	164.478	130.622	0	0
3	2	mtr-miR156a_L+1R-1_1ss4AC	ATGCCAGAAGAGAGAGAGCAC	21	comp50779_c0	-	318	361	tgATGACAGAAGAGAGAGAGCACgccctgtcggtaatgtcaggt	1	mtr-MIR156a,	mtr-MIR156a	agccatgaatcagtccgagaTGACAGAAGAGAGAGAGCACAcccacctgattacaagtaacaaaaaactaccaactatcaacattttgtctactatgaagaaaatcacatgtctagactatagttacgaatggaagatacattcaatgatgtttatgaaaatttgagacggtcgaggactatagttactctatcgcatacatttaatgacaaaaaaaattgtgtactcttatttattttcaatacatcttcattcaatttctatgcaagaatcaaaatgcagtataaaaaattgcattcaatatcatggtaaaaaaattgttcaaaaaaagtaaatatcatggtaaaaaaatcattagattttgcaataagtaagagtcaagttttaccttgtgaggaa…	mtr-miR156a	TGACAGAAGAGAGAGAGCACA	5'	Diff	gp2b	...(((((.....((.((........)).)).....)))))...	38	52.3	-8.9	0.4	0	0	4	34	0	0	41.5	0	0	0	0	0	0	0	0	0	0	0	6.51167	34.6126	0	0	25.8554	0	0	0
4	3	bcy-miR156_L-1	TTGACAGAAGATAGAGAGCAC	21	comp59160_c0	-	848	1000	cccagggttgatTTGACAGAAGAGAGAGAGCACagccagagtcagtgacaccggtgaaacattctcccggaggaatggtggaaccggaatagctggacccacttgctgagccatgcagaaaaaggtttgacggaggattttcagattcgctct	78	bcy-MIR156,bgy-MIR156,han-MIR156c,bol-MIR157a,dpr-MIR156a,vun-MIR156b,ahy-MIR156b,hbr-MIR156,cca-MIR156c,rco-MIR156h,rco-MIR156f,rco-MIR156g,sly-MIR156a,sly-MIR156c,sly-MIR156b,cpa-MIR156e,cpa-MIR156f,tcc-MIR156f,tcc-MIR156e,bna-MIR156b,bna-MIR156c,bna-MIR156g,bra-MIR157a,lus-MIR156i,lus-MIR156d,lus-MIR156b,lus-MIR156c,lus-MIR156f,lus-MIR156e,lus-MIR156h,mes-MIR156f,mes-MIR156i,mes-MIR156h,mes-MI…	bcy-MIR156	tgTTTGACAGAAGATAGAGAGCACagatgatgatgtgcaatttttggattctgcatctcactcctttgtgctctctatgcttctgtcatca	bcy-miR156	TTTGACAGAAGATAGAGAGCAC	5'	Diff	gp2b	...((((..(((((((.............((.((((.((..(((((....(((((....((((((......)))))).....)))))....))))).....)).)))).))....((((......))))...........)))))))..))))	150	51.6	-39.2	0.5	8	4	0	24	28.5	9.5	45.5	11.5	12.5	6.5	13	0	40	32.5	13.5	0	10.6935	7.27062	0	24.4324	21.3053	10.1841	28.3475	7.1531	12.8921	6.75908
5	3	bcy-miR156_L-1	TTGACAGAAGATAGAGAGCAC	21	comp61321_c0	-	31	152	catggatcatgggctgaggcatggtcgtaagatttacatgaatggggtggtcgagtgcaatgtttgctggctctgagccccaagaattggTTGACAGAAGAGAGAGAGCACgatgatctggc	117	bcy-MIR156,bgy-MIR156,han-MIR156c,bol-MIR157a,dpr-MIR156a,vun-MIR156a,vun-MIR156b,ahy-MIR156b,hbr-MIR156,aqc-MIR156b,aqc-MIR156a,cca-MIR156c,rco-MIR156h,rco-MIR156b,rco-MIR156g,rco-MIR156f,rco-MIR156a,rco-MIR156d,sly-MIR156a,sly-MIR156c,sly-MIR156b,ghr-MIR156d,cpa-MIR156e,cpa-MIR156f,tcc-MIR156f,tcc-MIR156g,tcc-MIR156e,tcc-MIR156c,bna-MIR156c,bna-MIR156b,bna-MIR156f,bna-MIR156g,bra-MIR157a,lus-MI…	bcy-MIR156	tgTTTGACAGAAGATAGAGAGCACagatgatgatgtgcaatttttggattctgcatctcactcctttgtgctctctatgcttctgtcatca	bcy-miR156	TTTGACAGAAGATAGAGAGCAC	3'	Diff	gp2b	...(((((((..(((....(((((((....)))...))))..((((((....((((((((...))))..))))...))))))........................)))...)))))))...	116	50.8	-32.9	0.5	8	4	0	24	28.5	9.5	45.5	11.5	12.5	6.5	13	0	40	32.5	13.5	0	10.6935	7.27062	0	24.4324	21.3053	10.1841	28.3475	7.1531	12.8921	6.75908
6	4	hbr-MIR159b-p5_1ss10GT	AGCTGCTGATCTATGGATCCC	21	comp50087_c0	+	19	170	gAGCTGCTGATCTATGGATCCCtcagttctatccatccatttctttgaaagtggataggcttgtggcttccatatgtcaggagctgcattacctaagttagatccttgTTTGGATTGAAGGGAGCTCTAcaccacacctctctctcagtatt	30	pvu-MIR159a,htu-MIR159a,ahy-MIR159,hbr-MIR159b,hbr-MIR159a,aqc-MIR159,csi-MIR159,rco-MIR159,sly-MIR159,cpa-MIR159a,bna-MIR159,bra-MIR159a,lus-MIR159c,lus-MIR159b,mes-MIR159b,mes-MIR159a,nta-MIR159,vvi-MIR159c,ppe-MIR159,aly-MIR159a,aly-MIR159b,aly-MIR159c,ath-MIR159a,ath-MIR159b,ath-MIR159c,ptc-MIR159a,ptc-MIR159b,gma-MIR159e,gma-MIR159a,mtr-MIR159a,	hbr-MIR159b	ctgattagggttaagaagtggagctccttgaagtccaatagaggttcttgcgtgggtagattgagctgctgagctatggatccctcagccctatcccatcataaagagtagtcctcttggataggcttgtggcTTGCATATCTCAGGAGCTTCAttaccacatatgttagatccttgTTTGGATTGAAGGGAGCTCTAcatctaaatctttcac	hbr-MIR159b-p5	agctgctgagctatggatccc	5'	New	gp2b	.((((.((((..((((((..((.(((..((((((((.((......))...))))))))..))).))..))))))..)))).))))...............(((((......)))))((((((((.............)))))).))......	84	44.7	-48.4	0.7	334	514	214	1001	1069	694	1574	4375	674	707	2936	309	806	4009	1298	1903	446.454	934.275	348.375	1019.04	799.136	743.976	980.635	2721.29	695.142	735.18
6	5	pvu-miR159a.1	TTTGGATTGAAGGGAGCTCTA	21	comp50087_c0	+	19	170	gAGCTGCTGATCTATGGATCCCtcagttctatccatccatttctttgaaagtggataggcttgtggcttccatatgtcaggagctgcattacctaagttagatccttgTTTGGATTGAAGGGAGCTCTAcaccacacctctctctcagtatt	30	pvu-MIR159a,htu-MIR159a,ahy-MIR159,hbr-MIR159b,hbr-MIR159a,aqc-MIR159,csi-MIR159,rco-MIR159,sly-MIR159,cpa-MIR159a,bna-MIR159,bra-MIR159a,lus-MIR159c,lus-MIR159b,mes-MIR159b,mes-MIR159a,nta-MIR159,vvi-MIR159c,ppe-MIR159,aly-MIR159a,aly-MIR159b,aly-MIR159c,ath-MIR159a,ath-MIR159b,ath-MIR159c,ptc-MIR159a,ptc-MIR159b,gma-MIR159e,gma-MIR159a,mtr-MIR159a,	pvu-MIR159a	gtggagctccttgaagtccaattgaggatcttactgggtggattgagctgcttagctatggatcccacagttctacccatcagcatgttttgtggtagtcttgtggCTTCCATATCTGGGGAGCTTCatctgcctctatagtatcatccttcTTTGGATTGAAGGGAGCTCTAc	pvu-miR159a.1	TTTGGATTGAAGGGAGCTCTA	3'	Yes	gp2b	.((((.((((..((((((..((.(((..((((((((.((......))...))))))))..))).))..))))))..)))).))))...............(((((......)))))((((((((.............)))))).))......	84	44.7	-48.4	0.7	2713	4649	3046	14041	6199	6618	17492	37090	6440	7833	20876	3968	9877	27407	7574	18573	3626.43	8450.28	4958.64	14294	4634.09	7094.57	10897.9	23070.3	6642.01	8145.21
7	6	hbr-MIR159b-p3_1ss20GA	AGCTCCTTGAAGTCCAATAAA	21	comp30930_c0	+	107	205	aagcagatagttatgtttgtgtgggtttagggtttgtggtattctgaaattagggttttggagtggAGCTCCTTGAAGTCCAATAAAaggaacttactg	13	pvu-MIR159a,hbr-MIR159b,hbr-MIR159a,rco-MIR159,sly-MIR159,cpa-MIR159a,mes-MIR159a,vvi-MIR159c,ppe-MIR159,ptc-MIR159a,ptc-MIR159b,gma-MIR159e,gma-MIR159a,	hbr-MIR159b	ctgattagggttaagaagtggagctccttgaagtccaatagaggttcttgcgtgggtagattgagctgctgagctatggatccctcagccctatcccatcataaagagtagtcctcttggataggcttgtggcTTGCATATCTCAGGAGCTTCAttaccacatatgttagatccttgTTTGGATTGAAGGGAGCTCTAcatctaaatctttcac	hbr-MIR159b-p3	agctccttgaagtccaataga	3'	New	gp2b	...(((..((((...(((((.(((((((((((...((..(((((..((((....))))..)))))..)).))))))).)))))))))...))))..)))	96	39.4	-27	0.7	61	68	51	140	159	82	329	723	114	114	519	41	94	505	322	317	81.538	123.601	83.0239	142.523	118.861	87.9049	204.974	449.713	117.576	118.544
8	7	htu-miR160a_R+1	TGCCTGGCTCCCTGTATGCCA	21	comp58420_c0	-	428	521	gaaagggggcgaaaacagacttgaatggagtttattgaggtggaaatctgataaagatataccatattgagcgTGCCTGGCTCCCTGCATGCCA	69	htu-MIR160a,vun-MIR160,aqc-MIR160b,cca-MIR160b,csi-MIR160,rco-MIR160b,rco-MIR160a,sly-MIR160a,ghr-MIR160,cpa-MIR160c,cpa-MIR160f,cpa-MIR160a,cpa-MIR160b,cpa-MIR160e,tcc-MIR160b,bna-MIR160b,bna-MIR160d,bna-MIR160a,bna-MIR160c,bra-MIR160a,lus-MIR160b,lus-MIR160h,lus-MIR160j,lus-MIR160f,lus-MIR160i,lus-MIR160d,lus-MIR160a,lus-MIR160e,mes-MIR160a,mes-MIR160d,mes-MIR160b,mes-MIR160g,mes-MIR160h,mes-MI…	htu-MIR160a	gcaTGCCTGGCTCCCTGTATGCCtcctgcaggaaaacaactgctgggggtatgagggttgactgaaaaggacggtggaagggcaaaaccgtct	htu-miR160a	TGCCTGGCTCCCTGTATGCC	3'	Diff	gp2b	...(((((((.....((..((..(((((..((((((.((((....))))))))))......)))).)..))..))....)))))))........	83	45.7	-22.9	0.5	1024	406	736	1955	2961	1015	3180	5935	4020	942	6112	464	304	8365	2626	2999	1368.77	737.968	1198.15	1990.23	2213.51	1088.09	1981.21	3691.62	4146.1	979.547
9	8	hpe-miR162a_L-2	GATAAACCTCTGCATCCAG	19	comp67758_c0	-	7322	7442	tcagcctgttgcagctgttcggtgaaggtcttgagtgccggactatcgaaacgagcataaagcagatcttccggggcgaagttttgcagattccagtGATAAACCTCTACATCCAGgccat	32	hpe-MIR162a,aau-MIR162,htu-MIR162a,vun-MIR162,csi-MIR162,rco-MIR162,sly-MIR162,ghr-MIR162a,cpa-MIR162a,tcc-MIR162,bra-MIR162,lus-MIR162a,lus-MIR162b,mes-MIR162,nta-MIR162a,nta-MIR162b,vvi-MIR162,ppe-MIR162,aly-MIR162a,aly-MIR162b,mdm-MIR162b,mdm-MIR162a,stu-MIR162b,stu-MIR162a,ath-MIR162a,ath-MIR162b,ptc-MIR162b,ptc-MIR162a,gma-MIR162a,gma-MIR162c,gma-MIR162b,mtr-MIR162,	hpe-MIR162a	tcatttgtgttccgtagaggatcactggattcagcggttcatcgatctgttccataatcctaatgattaaatgttcatacgacgattgagagaggtgggaaatggaatcgaTCGATAAACCTCTGCATCCAGtgttcttcctgcttagcacgatcttgtttgtgattc	hpe-miR162a	TCGATAAACCTCTGCATCCAG	3'	Diff	gp2b	...(((((.......((((((..((..((((........))))..))....))))))....(((((.((((......)))).)))))..........................)))))...	115	50.4	-29	0.5	0	0	0	0	0	0	0	0	0	0	0	0	5	4.5	0	0	0	0	0	0	0	0	0	0	0	0
10	8	hpe-miR162a_L-2	GATAAACCTCTGCATCCAG	19	comp68542_c0	+	12872	12992	tcagcctgttgcagctgttcggtgaaggtcttgagtgccggactatcgaaacgagcataaagcagatcttccggggcgaagttttgcagattccagtGATAAACCTCTACATCCAGgccat	32	hpe-MIR162a,aau-MIR162,htu-MIR162a,vun-MIR162,csi-MIR162,rco-MIR162,sly-MIR162,ghr-MIR162a,cpa-MIR162a,tcc-MIR162,bra-MIR162,lus-MIR162a,lus-MIR162b,mes-MIR162,nta-MIR162a,nta-MIR162b,vvi-MIR162,ppe-MIR162,aly-MIR162a,aly-MIR162b,mdm-MIR162b,mdm-MIR162a,stu-MIR162b,stu-MIR162a,ath-MIR162a,ath-MIR162b,ptc-MIR162b,ptc-MIR162a,gma-MIR162a,gma-MIR162c,gma-MIR162b,mtr-MIR162,	hpe-MIR162a	tcatttgtgttccgtagaggatcactggattcagcggttcatcgatctgttccataatcctaatgattaaatgttcatacgacgattgagagaggtgggaaatggaatcgaTCGATAAACCTCTGCATCCAGtgttcttcctgcttagcacgatcttgtttgtgattc	hpe-miR162a	TCGATAAACCTCTGCATCCAG	3'	Diff	gp2b	...(((((.......((((((..((..((((........))))..))....))))))....(((((.((((......)))).)))))..........................)))))...	115	50.4	-29	0.5	0	0	0	0	0	0	0	0	0	0	0	0	5	4.5	0	0	0	0	0	0	0	0	0	0	0	0
11	9	ctr-miR164_R-1	TGGAGAAGCAGGGCACGTGC	20	comp469165_c0	-	96	224	tggttgacatgtttgggtccatgtgggtgaggtgagaaaaagtaggggtggtttggtttggggtgaaaaTGGAGAAGCAGGGCACTTGCtcatagtcatgatactcatttgtattggtttggtcaaagg	70	ctr-MIR164,ssl-MIR164b,ssl-MIR164a,csi-MIR164,rco-MIR164c,rco-MIR164a,rco-MIR164b,sly-MIR164a,sly-MIR164b,ghr-MIR164,cpa-MIR164b,cpa-MIR164c,cpa-MIR164a,tcc-MIR164b,tcc-MIR164a,bna-MIR164d,bra-MIR164d,bna-MIR164c,bra-MIR164c,bna-MIR164a,bna-MIR164b,bra-MIR164e,bra-MIR164b,bra-MIR164a,lus-MIR164d,lus-MIR164a,lus-MIR164c,lus-MIR164b,lus-MIR164e,mes-MIR164b,mes-MIR164c,mes-MIR164a,nta-MIR164a,nta-MI…	ctr-MIR164	gaaggtgtgtgtagagcaagaTGGAGAAGCAGGGCACGTGCAttactaactcaaccgcacatacatctactaacaaaaattaattaatccacacattttgaagaaaccaaatcaagaagcaggaggctctttctgttgttatagctcagtcatgagttgagttatttcttcatgtgcccttcttccccatcatgaccgcggcaccttgtgcgtgtgtgtgtgtgtatcatcagggatcagctcaagatctgaatttcttcttagcaaaattcatgtgccaatctaaagcctaccaaa	ctr-miR164	TGGAGAAGCAGGGCACGTGCA	3'	Diff	gp2b	...(((((....(..(...((..((((((..((((.....((((..((((..(((.(((...((....))...))).)))..)))))))).....))))..))))))..))..)..)....)))))...	123	45.7	-26.7	0.5	0	0	0	0	0	0	0	0	0	0	0	0	26	0	0	0	0	0	0	0	0	0	0	0	0	0
12	10	csi-miR166e-5p	GGAATGTTGTCTGGCTCGAGG	21	comp55074_c0	+	125	271	gGGAATGTTGTCTGGCTCGAGGaccctttcttgatcaatttctatcacagatctgtatatctatagatctgtatgtatttatacatatatgaaagattgtttgatcatgtgttagtgttgTCGGACCAGGCTTCATTCCCCccaatt	148	hpe-MIR166a,crt-MIR166a,crt-MIR166b,ctr-MIR166,pvu-MIR166a,dpr-MIR166b,ssl-MIR166b,hbr-MIR166b,hbr-MIR166a,aqc-MIR166e,aqc-MIR166b,csi-MIR166c,csi-MIR166a,csi-MIR166e,csi-MIR166d,csi-MIR166b,rco-MIR166c,rco-MIR166d,rco-MIR166a,rco-MIR166b,rco-MIR166e,sly-MIR166b,sly-MIR166a,ghr-MIR166b,cpa-MIR166c,cpa-MIR166a,cpa-MIR166e,cpa-MIR166b,cpa-MIR166d,tcc-MIR166d,tcc-MIR166a,tcc-MIR166b,bna-MIR166e,bna-…	csi-MIR166e	ggggagctttttgttttgaggGGAATGTTGTCTGGCTCGAGGacactacttgttgatccattaattttacgtattctctcatagatctagcatctgaatggtggataacaatatacggattcagcttatttggcgtcgTCGGACCAGGCTTCATTCCCCCcaatatattgcttctat	csi-miR166e-5p	GGAATGTTGTCTGGCTCGAGG	5'	Yes	gp2b	(((((((..((((((..(((..((.((....(((((((..(((.(((((((((((((....))))))))))((((((....))))))..))).)))....)))))))......)).))..)))..))))))..))))))).......	140	38.1	-55	1	352	779	1072	3605	868	800	9679	5433	772	1214	5613	501	1078	2409	2580	3953	470.514	1415.95	1745.13	3669.96	648.877	857.609	6030.22	3379.38	796.217	1262.39
12	11	hpe-miR166a_1ss5AC	TCGGCCCAGGCTTCATTCCCC	21	comp55074_c0	+	125	271	gGGAATGTTGTCTGGCTCGAGGaccctttcttgatcaatttctatcacagatctgtatatctatagatctgtatgtatttatacatatatgaaagattgtttgatcatgtgttagtgttgTCGGACCAGGCTTCATTCCCCccaatt	148	hpe-MIR166a,crt-MIR166a,crt-MIR166b,ctr-MIR166,pvu-MIR166a,dpr-MIR166b,ssl-MIR166b,hbr-MIR166b,hbr-MIR166a,aqc-MIR166e,aqc-MIR166b,csi-MIR166c,csi-MIR166a,csi-MIR166e,csi-MIR166d,csi-MIR166b,rco-MIR166c,rco-MIR166d,rco-MIR166a,rco-MIR166b,rco-MIR166e,sly-MIR166b,sly-MIR166a,ghr-MIR166b,cpa-MIR166c,cpa-MIR166a,cpa-MIR166e,cpa-MIR166b,cpa-MIR166d,tcc-MIR166d,tcc-MIR166a,tcc-MIR166b,bna-MIR166e,bna-…	hpe-MIR166a	ggtagatctttcttttgtggggaatgttgtctggctcgagaccacaagaaagcttcaatctttataatctttatgttacataatcacataattgatcaatctttgttgatcaatgattaaagattagaatcttgtgttgTCGGACCAGGCTTCATTCCCCtcatgtgttcttcctt	hpe-miR166a	TCGGACCAGGCTTCATTCCCC	3'	Diff	gp2b	(((((((..((((((..(((..((.((....(((((((..(((.(((((((((((((....))))))))))((((((....))))))..))).)))....)))))))......)).))..)))..))))))..))))))).......	140	38.1	-55	1	811	733	5336	19080	800	748	9581	5479	1031	1404	7657	937	456	2889	2408	4375	1084.05	1332.34	8686.57	19423.8	598.044	801.865	5969.16	3407.99	1063.34	1459.96
13	12	dpr-miR167a_L-2R+3	AAGCTGCCAGCATGATCTAGTG	22	comp48828_c0	+	203	246	gatgtgttggtttgagagcttgAAGCTGCCAGCATGATCTAGTG	19	dpr-MIR167b,cca-MIR167,ghr-MIR167a,tcc-MIR167b,bna-MIR167a,bra-MIR167b,bra-MIR167c,bna-MIR167b,bra-MIR167d,bna-MIR167c,bra-MIR167a,vvi-MIR167a,aly-MIR167b,aly-MIR167a,gra-MIR167a,ath-MIR167a,ath-MIR167b,ptc-MIR167b,ptc-MIR167d,	dpr-MIR167b	tctagaaaggaacaagTGAAGCTGCCAGCATGATCTAtcttgggatggttttggatatgagagtactaaccctagctaggtcatgctgtagcagcatcacttcttcctctttggg	dpr-miR167a	TGAAGCTGCCAGCATGATCTA	3'	Diff	gp2b	(((((((((((.....(((.....))))))))))).))).....	39	47.7	-13	0.6	0	0	0	0	0	0	0	9	0	0	18	0	0	9	0	12	0	0	0	0	0	0	0	5.59808	0	0
14	13	crt-miR168_L-2	GCTTGGTGCAGGTCGGGAA	19	comp47131_c0	+	1	94	GCTTGGTGCAGGTCGGGAActacttcgccggcggcggcgattgattctgattgattcgggggcgaatcgggtCCCGCCTTGCATCAACTGAATc	34	crt-MIR168,ccl-MIR168,vun-MIR168,cca-MIR168a,rco-MIR168,sly-MIR168b,sly-MIR168a,tcc-MIR168,bna-MIR168a,bra-MIR168a,bra-MIR168b,bra-MIR168c,lus-MIR168b,lus-MIR168a,mes-MIR168a,nta-MIR168d,nta-MIR168a,nta-MIR168b,nta-MIR168e,nta-MIR168c,vvi-MIR168,ppe-MIR168,aly-MIR168a,aly-MIR168b,mdm-MIR168a,mdm-MIR168b,ath-MIR168a,ath-MIR168b,ptc-MIR168b,ptc-MIR168a,gma-MIR168b,gma-MIR168a,mtr-MIR168c,mtr-MIR168…	crt-MIR168	agttaccggcggtctctaatTCGCTTGGTGCAGGTCGGGAActgattggctagtttttttttgaaattttttgacagcgaggtggcgtgttgtaattggtcgtcacgtttaaattaatgattgaaaaaaatgcgaattggatcccgccttgcatcaactgaatcggagaccgaggtgagagattggatggatatttacctt	crt-miR168	TCGCTTGGTGCAGGTCGGGAA	5'	Diff	gp2b	..((((((((((.(((((.((...((((((....))))))............((((((....)))))).))))))).)))))))))).......	85	59.6	-40.2	0.7	0	0	0	0	0	0	0	8	0	0	4	0	0	7.5	0	0	0	0	0	0	0	0	0	4.97607	0	0
14	14	sly-miR168b-3p	CCCGCCTTGCATCAACTGAAT	21	comp47131_c0	+	1	94	GCTTGGTGCAGGTCGGGAActacttcgccggcggcggcgattgattctgattgattcgggggcgaatcgggtCCCGCCTTGCATCAACTGAATc	34	crt-MIR168,ccl-MIR168,vun-MIR168,cca-MIR168a,rco-MIR168,sly-MIR168b,sly-MIR168a,tcc-MIR168,bna-MIR168a,bra-MIR168a,bra-MIR168b,bra-MIR168c,lus-MIR168b,lus-MIR168a,mes-MIR168a,nta-MIR168d,nta-MIR168a,nta-MIR168b,nta-MIR168e,nta-MIR168c,vvi-MIR168,ppe-MIR168,aly-MIR168a,aly-MIR168b,mdm-MIR168a,mdm-MIR168b,ath-MIR168a,ath-MIR168b,ptc-MIR168b,ptc-MIR168a,gma-MIR168b,gma-MIR168a,mtr-MIR168c,mtr-MIR168…	sly-MIR168b	ttgcggtggtttctcatTCGCTTGGTGCAGGTCGGGACctacctcgccggcaacaatggcggtagctgacggcgacggcagcgtaccggtaaaaaagaatcttatttttacatgttgttgcgtagtttgggtCCCGCCTTGCATCAACTGAATaggagactgcggtga	sly-miR168b-3p	CCCGCCTTGCATCAACTGAAT	3'	Yes	gp2b	..((((((((((.(((((.((...((((((....))))))............((((((....)))))).))))))).)))))))))).......	85	59.6	-40.2	0.7	221	291	348	464	674	376	1220	2534	487	475	1475	133	348	1906	430	931	295.408	528.938	566.516	472.36	503.852	403.076	760.086	1576.17	502.277	493.933
15	13	crt-miR168_L-2	GCTTGGTGCAGGTCGGGAA	19	comp68236_c0	-	305	403	GCTTGGTGCAGCTCGGGAActggtggtctagaaggcccaccagcagaaggtacaaccccaaggccaccacccacaccactactgctgctgccaccacgc	27	crt-MIR168,ccl-MIR168,vun-MIR168,cca-MIR168a,rco-MIR168,tcc-MIR168,bna-MIR168a,bra-MIR168a,lus-MIR168b,lus-MIR168a,mes-MIR168a,nta-MIR168d,nta-MIR168e,vvi-MIR168,ppe-MIR168,aly-MIR168a,aly-MIR168b,mdm-MIR168a,mdm-MIR168b,ath-MIR168a,ath-MIR168b,ptc-MIR168a,ptc-MIR168b,gma-MIR168b,gma-MIR168a,mtr-MIR168c,mtr-MIR168b,	crt-MIR168	agttaccggcggtctctaatTCGCTTGGTGCAGGTCGGGAActgattggctagtttttttttgaaattttttgacagcgaggtggcgtgttgtaattggtcgtcacgtttaaattaatgattgaaaaaaatgcgaattggatcccgccttgcatcaactgaatcggagaccgaggtgagagattggatggatatttacctt	crt-miR168	TCGCTTGGTGCAGGTCGGGAA	5'	Diff	gp2b	((.(((((((((..(((...(((((((((....((...(((.......)))....))...))))))))))))....((....))..))))).)))).))	99	62.6	-34.5	0.6	0	0	0	0	0	0	0	8	0	0	4	0	0	7.5	0	0	0	0	0	0	0	0	0	4.97607	0	0
16	15	aqc-miR169c_R+1_1ss20GA	CAGCCAAGGATGACTTGCCAGA	22	comp27770_c0	+	74	104	aagtggtgCAGCCAAGGATGACTTGCCAGAa	16	aqc-MIR169c,sly-MIR169a,tcc-MIR169b,bna-MIR169n,lus-MIR169f,mes-MIR169e,mes-MIR169d,vvi-MIR169k,vvi-MIR169c,vvi-MIR169j,vvi-MIR169a,aly-MIR169b,ath-MIR169b,ptc-MIR169f,gma-MIR169m,gma-MIR169g,	aqc-MIR169c	aatgCAGCCAAGGATGACTTGCCGGaacgttgttaaccatgcatatgaataatgtgatgattaattatgtgatgaacatatttctggcaagttgtccttcggctacatttt	aqc-miR169c	CAGCCAAGGATGACTTGCCGG	3'	Diff	gp2b	...(((......((((.....)))))))...	25	51.6	-3.2	0.2	0	0	0	0	14	0	0	0	33	0	0	0	0	8	0	0	0	0	0	0	10.4658	0	0	0	34.0352	0
17	16	ccl-miR171	TGATTGAGCCGCGCCAATATC	21	comp61081_c0	-	481	506	gTGATTGAGCCGCGCCAATATCTCTt	36	ccl-MIR171,ssl-MIR171b,csi-MIR171a,lja-MIR171d,rco-MIR171g,sly-MIR171c,sly-MIR171d,sly-MIR171e,tcc-MIR171a,tcc-MIR171b,tcc-MIR171c,bna-MIR171f,bra-MIR171e,bna-MIR171g,lus-MIR171f,lus-MIR171a,mes-MIR171f,mes-MIR171e,nta-MIR171b,vvi-MIR171e,vvi-MIR171f,ppe-MIR171b,aly-MIR171a,mdm-MIR171e,mdm-MIR171d,mdm-MIR171c,mdm-MIR171j,mdm-MIR171k,mdm-MIR171l,stu-MIR171b,ath-MIR171a,ptc-MIR171c,ptc-MIR171d,gma-…	ccl-MIR171	gatctcttgggggttaaaatgaagattgtggtgaccattttggaggatggatgggtactcacgggatattggtgcggttcaataagaaaacggtgctcaatactttttgagctccgcttttTGATTGAGCCGCGCCAATATCacgtgccactcgctctctaattgctttcttttaagcacaggggagcgcgtaattatgttgaggtcaggtaagtaggggtttaaattaaaattctagcttattgcttctgtttaaattttactgttcaattggctccatttagatgcatcattgtttttatgttatgaccctttcgaatt	ccl-miR171	TGATTGAGCCGCGCCAATATC	5'	Yes	gp2b	...((((.((...)))))).......	16	50	-1.9	0.1	0	0	26.5	0	0	0	169.5	238	6.5	4.5	0	0	0	0	91	283.5	0	0	43.1398	0	0	0	105.602	148.038	6.7039	4.67936
17	17	ssl-miR171b_2ss11CT19AT	TTGAGCCGCGTCAATATCTCT	21	comp61081_c0	-	481	506	gTGATTGAGCCGCGCCAATATCTCTt	36	ccl-MIR171,ssl-MIR171b,csi-MIR171a,lja-MIR171d,rco-MIR171g,sly-MIR171c,sly-MIR171d,sly-MIR171e,tcc-MIR171a,tcc-MIR171b,tcc-MIR171c,bna-MIR171f,bra-MIR171e,bna-MIR171g,lus-MIR171f,lus-MIR171a,mes-MIR171f,mes-MIR171e,nta-MIR171b,vvi-MIR171e,vvi-MIR171f,ppe-MIR171b,aly-MIR171a,mdm-MIR171e,mdm-MIR171d,mdm-MIR171c,mdm-MIR171j,mdm-MIR171k,mdm-MIR171l,stu-MIR171b,ath-MIR171a,ptc-MIR171c,ptc-MIR171d,gma-…	ssl-MIR171b	agcgatattggtgaggttcaatccgaagacggatttactgatgcagctagtaaagtgcgatctcagaTTGAGCCGCGCCAATATCACT	ssl-miR171b	TTGAGCCGCGCCAATATCACT	3'	Diff	gp2b	...((((.((...)))))).......	16	50	-1.9	0.1	8	0	87.5	161	90	25.5	138.5	535	38	49	368.5	61.5	115.5	80.5	80.5	219.5	10.6935	0	142.443	163.901	67.2799	27.3363	86.2884	332.775	39.192	50.9531
18	16	ccl-miR171	TGATTGAGCCGCGCCAATATC	21	comp47430_c0	-	352	394	cacgggtgatcgcaactgttgtTGATTGAGCCGCGCCAAAATC	13	ccl-MIR171,csi-MIR171a,sly-MIR171c,tcc-MIR171a,bna-MIR171g,bna-MIR171f,bra-MIR171e,vvi-MIR171e,aly-MIR171a,mdm-MIR171e,mdm-MIR171c,mdm-MIR171d,ath-MIR171a,	ccl-MIR171	gatctcttgggggttaaaatgaagattgtggtgaccattttggaggatggatgggtactcacgggatattggtgcggttcaataagaaaacggtgctcaatactttttgagctccgcttttTGATTGAGCCGCGCCAATATCacgtgccactcgctctctaattgctttcttttaagcacaggggagcgcgtaattatgttgaggtcaggtaagtaggggtttaaattaaaattctagcttattgcttctgtttaaattttactgttcaattggctccatttagatgcatcattgtttttatgttatgaccctttcgaatt	ccl-miR171	TGATTGAGCCGCGCCAATATC	3'	Yes	gp2b	..(((((.....((((....)))).....))).))........	33	53.5	-9.4	0.4	0	0	26.5	0	0	0	169.5	238	6.5	4.5	0	0	0	0	91	283.5	0	0	43.1398	0	0	0	105.602	148.038	6.7039	4.67936
19	18	ssl-miR171b	TTGAGCCGCGCCAATATCACT	21	FS948109	-	137	215	ggaTTGAGCCGCGCCAATATTACTttttagtctgtttgttacatgagttgttcctgataaaagtagtgtttggtgtttt	23	ssl-MIR171b,lja-MIR171d,rco-MIR171g,sly-MIR171d,tcc-MIR171c,tcc-MIR171b,lus-MIR171a,lus-MIR171f,mes-MIR171f,mes-MIR171e,nta-MIR171b,vvi-MIR171f,vvi-MIR171e,ppe-MIR171b,mdm-MIR171j,mdm-MIR171k,mdm-MIR171l,ptc-MIR171k,ptc-MIR171c,ptc-MIR171d,gma-MIR171k,gma-MIR171l,mtr-MIR171e,	ssl-MIR171b	agcgatattggtgaggttcaatccgaagacggatttactgatgcagctagtaaagtgcgatctcagaTTGAGCCGCGCCAATATCACT	ssl-miR171b	TTGAGCCGCGCCAATATCACT	5'	Yes	gp2b	..........(((((((((((((((((..(((........(((.....)))....))))))))))))))).)))))...	66	36.7	-17.5	0.6	8	0	7.5	12	14	5.5	70.5	38	24	35	240.5	7.5	31.5	12.5	35.5	23.5	10.6935	0	12.2094	12.2162	10.4658	5.89606	43.923	23.6363	24.7528	36.3951
20	19	lja-miR171d-3p	CGATGTTGGTGAGGTTCAATC	21	comp4976_c0	+	103	144	gaagaggggactgctcaaCGTTGTTGGTGAGGTTCAATCgaa	18	lja-MIR171d,rco-MIR171g,sly-MIR171d,tcc-MIR171b,tcc-MIR171c,mes-MIR171f,nta-MIR171b,vvi-MIR171e,vvi-MIR171f,ppe-MIR171b,mdm-MIR171j,mdm-MIR171k,mdm-MIR171l,ptc-MIR171c,ptc-MIR171d,gma-MIR171k,gma-MIR171l,mtr-MIR171e,	lja-MIR171d	gagaaagCGATGTTGGTGAGGTTCAATCtgaagacggatttacatgaagaagcagtaaaatacgatctcagaTTGAGCCGCGCCAATATCACTtttctt	lja-miR171d-3p	CGATGTTGGTGAGGTTCAATC	3'	Yes	gp2b	...((..(((((..(((((...)))))...)))))..))...	36	50	-9.8	0.5	0	0	0	0	0	0	0	0	0	12	21	0	9	0	0	0	0	0	0	0	0	0	0	0	0	12.4783
21	20	csi-miR172c_L-1_1ss6TA	GGAAACTTGATGATGCTGCAG	21	comp277706_c0	+	6	148	acgttttggaaTGAAACTTGATGATGCTGCAGaaagccttggtgttagtcgatctacattgaaacgtgtctgccgggaatataatatatcatggtggtcacctagcaagagaaccaaggataacggctctctttccaaaaaaa	34	csi-MIR172c,lja-MIR172a,rco-MIR172,tcc-MIR172a,bna-MIR172d,bra-MIR172c,lus-MIR172i,lus-MIR172e,mes-MIR172e,mes-MIR172f,nta-MIR172a,vvi-MIR172c,ppe-MIR172d,aly-MIR172d,aly-MIR172c,aly-MIR172f,mdm-MIR172l,mdm-MIR172b,mdm-MIR172o,mdm-MIR172c,mdm-MIR172n,mdm-MIR172a,mdm-MIR172m,stu-MIR172d,gra-MIR172b,ath-MIR172c,ath-MIR172d,ptc-MIR172h,ptc-MIR172g,gma-MIR172k,gma-MIR172d,gma-MIR172c,gma-MIR172e,mtr-…	csi-MIR172c	actgtttgcagttggagcaccatcaagattcacaaactattagggttagtgagtggagataatggtggctattttattttttttggccccttgcttcacttcaaattgctctttgtttTGGAATCTTGATGATGCTGCAGcagcgataagtggctaaattata	csi-miR172c	TGGAATCTTGATGATGCTGCAG	5'	Diff	gp2b	...((((((((.((........((.((((.......(((((((((((((((((....)))))...(((.(..(((((...........)).)))..).))))))))......)))))))....)))))))).))))))))...	137	41.3	-33.9	0.6	19	0	0	0	0	0	0	0	0	0	0	0	0	0	0	0	25.3971	0	0	0	0	0	0	0	0	0
22	21	aqc-miR172b_1ss21TG	GGAATCTTGATGATGCTGCAG	21	comp34255_c0	-	86	239	cgaagtagtggtggaagtggaaggagGGAATCCTGATGATGCTGCAGcggagaacagtgccaccgggctatccacactttggttctgcattttccatgcccagtttgggaatgccggtgaaggaatggcttcagtcaccttccctagtgctctt	36	aqc-MIR172b,csi-MIR172c,rco-MIR172,cpa-MIR172b,cpa-MIR172a,tcc-MIR172a,tcc-MIR172c,bna-MIR172c,bna-MIR172b,bra-MIR172d,lus-MIR172i,lus-MIR172e,lus-MIR172g,mes-MIR172e,mes-MIR172f,nta-MIR172j,vvi-MIR172c,ppe-MIR172d,ppe-MIR172c,aly-MIR172e,mdm-MIR172l,mdm-MIR172i,mdm-MIR172j,mdm-MIR172k,stu-MIR172d,gra-MIR172a,ath-MIR172e,ptc-MIR172h,ptc-MIR172g,ptc-MIR172d,ptc-MIR172e,gma-MIR172d,gma-MIR172e,gma-…	aqc-MIR172b	gtgcagcatcattaagattcacaaaccctaagagccttatgatgggttttgatattgatcactcttataggactttatagagatgGGAATCTTGATGATGCTGCATcg	aqc-miR172b	GGAATCTTGATGATGCTGCAT	5'	Diff	gp2b	...((((.(((.(((((..((..((((..(((((......((((..........))))..((((((.(..(((.((..((((....((((.....))))))))..)))))..))))))).)))).)..))))..))..)))))))).))))...	148	53.2	-48.1	0.6	430.5	40.5	0	0	416	66	0	23	1422	382	0	0	109.5	172.5	0	0	575.444	73.615	0	0	310.983	70.7528	0	14.3062	1466.61	397.226
23	21	aqc-miR172b_1ss21TG	GGAATCTTGATGATGCTGCAG	21	comp64313_c0	-	1578	1619	gagaactgctgtgGGAATCCTGATGATGCTGCAGcagttgca	39	aqc-MIR172b,csi-MIR172c,rco-MIR172,ghr-MIR172,cpa-MIR172a,cpa-MIR172b,tcc-MIR172d,tcc-MIR172a,tcc-MIR172c,bna-MIR172c,bna-MIR172b,bra-MIR172d,lus-MIR172e,lus-MIR172i,lus-MIR172g,mes-MIR172e,mes-MIR172f,nta-MIR172j,vvi-MIR172c,ppe-MIR172d,ppe-MIR172c,aly-MIR172e,mdm-MIR172l,mdm-MIR172i,mdm-MIR172j,mdm-MIR172k,stu-MIR172d,gra-MIR172a,ath-MIR172e,ptc-MIR172h,ptc-MIR172g,ptc-MIR172d,ptc-MIR172e,gma-M…	aqc-MIR172b	gtgcagcatcattaagattcacaaaccctaagagccttatgatgggttttgatattgatcactcttataggactttatagagatgGGAATCTTGATGATGCTGCATcg	aqc-miR172b	GGAATCTTGATGATGCTGCAT	3'	Diff	gp2b	...((((((((..(..(((.....))).)..))))))))...	36	52.4	-17.1	0.8	430.5	40.5	0	0	416	66	0	23	1422	382	0	0	109.5	172.5	0	0	575.444	73.615	0	0	310.983	70.7528	0	14.3062	1466.61	397.226
24	22	aqc-MIR172b-p3_1ss9TC	TGGGAATCCTGATGATGCTGC	21	comp60069_c0	-	452	518	gaaagcagcagtggtagtagctgcagaTGAGAATCCTGATGATGCTGCcgtagagactgttgttggg	38	aqc-MIR172b,rco-MIR172,ghr-MIR172,cpa-MIR172b,cpa-MIR172a,tcc-MIR172d,tcc-MIR172a,tcc-MIR172c,bna-MIR172b,bra-MIR172d,bna-MIR172c,lus-MIR172e,lus-MIR172g,lus-MIR172i,mes-MIR172e,mes-MIR172f,nta-MIR172j,vvi-MIR172c,ppe-MIR172c,ppe-MIR172d,aly-MIR172e,mdm-MIR172i,mdm-MIR172j,mdm-MIR172k,mdm-MIR172l,stu-MIR172d,gra-MIR172a,ath-MIR172e,ptc-MIR172e,ptc-MIR172g,ptc-MIR172d,ptc-MIR172h,gma-MIR172i,gma-M…	aqc-MIR172b	gtgcagcatcattaagattcacaaaccctaagagccttatgatgggttttgatattgatcactcttataggactttatagagatgGGAATCTTGATGATGCTGCATcg	aqc-MIR172b-p3	tgGGAATCTTGATGATGCTGC	3'	New	gp2b	...((((((((((((((((....(((((....)).)))....)))))))......)))))))))...	61	50.7	-21.7	0.6	0	0	0	0	0	0	0	0	0	0	52.5	0	0	0	0	0	0	0	0	0	0	0	0	0	0	0
25	23	htu-miR393a_R-1_1ss21CT	TCCAAAGGGATCGCATTGATT	21	PA_T506_TRA_5462	-	378	402	aacaTCCAAAGGGATCGCATTGTTT	48	htu-MIR393c,htu-MIR393a,htu-MIR393b,csi-MIR393,rco-MIR393,ghr-MIR393,cpa-MIR393,tcc-MIR393a,tcc-MIR393b,bna-MIR393,lus-MIR393b,lus-MIR393d,lus-MIR393a,lus-MIR393c,mes-MIR393c,mes-MIR393b,mes-MIR393d,mes-MIR393a,vvi-MIR393b,vvi-MIR393a,ppe-MIR393a,ppe-MIR393b,aly-MIR393a,aly-MIR393b,mdm-MIR393a,mdm-MIR393f,mdm-MIR393b,mdm-MIR393c,mdm-MIR393d,mdm-MIR393e,stu-MIR393,ath-MIR393b,ath-MIR393a,ptc-MIR39…	htu-MIR393b	ggttgaagctTCCAAAGGGATCGCATTGATCCatctgtccactcggatttcaatctcagttgataatttggatcatgcgatctcttcggaagcttcctccatcgc	htu-miR393a	TCCAAAGGGATCGCATTGATCC	3'	Diff	gp2b	...((((....))))..........	12	40	-2.7	0.3	0	0	0	0	6	5	0	0	4.5	12.5	0	0	4	28	0	0	0	0	0	0	4.48533	5.36006	0	0	4.64116	12.9982
26	23	htu-miR393a_R-1_1ss21CT	TCCAAAGGGATCGCATTGATT	21	comp64823_c0	-	1678	1702	gacaTCCAAAGGGATCGCATTGTTT	48	htu-MIR393a,htu-MIR393b,htu-MIR393c,csi-MIR393,rco-MIR393,ghr-MIR393,cpa-MIR393,tcc-MIR393a,tcc-MIR393b,bna-MIR393,lus-MIR393b,lus-MIR393a,lus-MIR393c,lus-MIR393d,mes-MIR393b,mes-MIR393c,mes-MIR393d,mes-MIR393a,vvi-MIR393b,vvi-MIR393a,ppe-MIR393a,ppe-MIR393b,aly-MIR393a,aly-MIR393b,mdm-MIR393a,mdm-MIR393f,mdm-MIR393b,mdm-MIR393c,mdm-MIR393d,mdm-MIR393e,stu-MIR393,ath-MIR393b,ath-MIR393a,ptc-MIR39…	htu-MIR393c	agcgggttgaagttTCCAAAGGGATCGCATTGATCCatctgtccactcggatttcaatctcagttgataatttggatcatgcgatctcttcggaagcttcc	htu-miR393a	TCCAAAGGGATCGCATTGATCC	3'	Diff	gp2b	...((((....))))..........	12	44	-2.7	0.2	0	0	0	0	6	5	0	0	4.5	12.5	0	0	4	28	0	0	0	0	0	0	4.48533	5.36006	0	0	4.64116	12.9982
27	24	ssl-miR394	TTGGCATTCTGTCCACCTCC	20	comp50927_c0	+	109	269	gttggtttaacaaagtgtttcttacagagtttaTTGGCATTCTGTCCACCTCCctcctctcagaaaaaaagcccgtatttctctctaaaatggaatggaggtgggcatactgccaactgagctctgttagtttctctttgTAAAACCCTCTTGATAGATAT	40	ssl-MIR394,ahy-MIR394,cca-MIR394,csi-MIR394,sly-MIR394,ghr-MIR394b,ghr-MIR394a,cpa-MIR394b,cpa-MIR394a,tcc-MIR394b,tcc-MIR394a,bna-MIR394b,bna-MIR394a,lus-MIR394a,lus-MIR394b,mes-MIR394c,mes-MIR394a,mes-MIR394b,nta-MIR394,vvi-MIR394b,vvi-MIR394a,vvi-MIR394c,ppe-MIR394a,ppe-MIR394b,aly-MIR394b,aly-MIR394a,mdm-MIR394b,mdm-MIR394a,stu-MIR384,ath-MIR394b,ath-MIR394a,ptc-MIR394a,ptc-MIR394b,gma-MIR394…	ssl-MIR394	TTGGCATTCTGTCCACCTCCtttcatcggagagaataccagaatctaacaaaccagaaaccttatttttcacgaaaaaataaaaagagaaaaaaaaacgtgaaattgttttggcttgtttaggaggtgggcatactgccaa	ssl-miR394	TTGGCATTCTGTCCACCTCC	5'	Yes	gp2b	...(((((.((((((.....((.((((((((((((((((...(((((((((((.(((....(((...(((.......)))...))).....)))..)))))))))))...)))))).)))))))))).)).....)))))).)))))..............	144	40.4	-58.5	0.9	2234.5	332	32	36.5	948	144.5	48.5	235.5	4892.5	910.5	308.5	23.5	137	2900	47	56	2986.83	603.461	52.0934	37.1577	708.682	154.906	30.2165	146.483	5045.97	946.791
27	25	aly-MIR394a-p3_2ss16CA17TG	TAAAACCCTCTTGATAGATAT	21	comp50927_c0	+	109	269	gttggtttaacaaagtgtttcttacagagtttaTTGGCATTCTGTCCACCTCCctcctctcagaaaaaaagcccgtatttctctctaaaatggaatggaggtgggcatactgccaactgagctctgttagtttctctttgTAAAACCCTCTTGATAGATAT	40	ssl-MIR394,ahy-MIR394,cca-MIR394,csi-MIR394,sly-MIR394,ghr-MIR394b,ghr-MIR394a,cpa-MIR394b,cpa-MIR394a,tcc-MIR394b,tcc-MIR394a,bna-MIR394b,bna-MIR394a,lus-MIR394a,lus-MIR394b,mes-MIR394c,mes-MIR394a,mes-MIR394b,nta-MIR394,vvi-MIR394b,vvi-MIR394a,vvi-MIR394c,ppe-MIR394a,ppe-MIR394b,aly-MIR394b,aly-MIR394a,mdm-MIR394b,mdm-MIR394a,stu-MIR384,ath-MIR394b,ath-MIR394a,ptc-MIR394a,ptc-MIR394b,gma-MIR394…	aly-MIR394a	tagattggatctttaaacttttgttccttttcatgagggtttgacaaagagtttcttacagacatctTTGGCATTCTGTCCACCTCCtcctgtacatgtgtgtatatatatgtgttttgtgtggaagaaggAGGTGGGTATACTGCCAATAgagatctgttagggtttcttcgtaaaaccctcttgatctatatacaactttatcaatgtcttgaatctg	aly-MIR394a-p3	taaaaccctcttgatctatat	3'	New	gp2b	...(((((.((((((.....((.((((((((((((((((...(((((((((((.(((....(((...(((.......)))...))).....)))..)))))))))))...)))))).)))))))))).)).....)))))).)))))..............	144	40.4	-58.5	0.9	8	0	0	0	0	0	0	0	0	0	0	0	0	0	0	0	10.6935	0	0	0	0	0	0	0	0	0
28	24	ssl-miR394	TTGGCATTCTGTCCACCTCC	20	comp65953_c0	-	946	1044	aacgacaacatgagtaaacctttgttacccaagcaagtcattcgaacgtgctttccgtaaaactccaagcaccatatgtTTGGCATTCTGTCAACCTCC	40	ssl-MIR394,ahy-MIR394,cca-MIR394,csi-MIR394,sly-MIR394,ghr-MIR394b,ghr-MIR394a,cpa-MIR394b,cpa-MIR394a,tcc-MIR394b,tcc-MIR394a,bna-MIR394b,bna-MIR394a,lus-MIR394a,lus-MIR394b,mes-MIR394c,mes-MIR394a,mes-MIR394b,nta-MIR394,vvi-MIR394b,vvi-MIR394a,vvi-MIR394c,ppe-MIR394b,ppe-MIR394a,aly-MIR394b,aly-MIR394a,mdm-MIR394a,mdm-MIR394b,stu-MIR384,ath-MIR394b,ath-MIR394a,ptc-MIR394a,ptc-MIR394b,gma-MIR394…	ssl-MIR394	TTGGCATTCTGTCCACCTCCtttcatcggagagaataccagaatctaacaaaccagaaaccttatttttcacgaaaaaataaaaagagaaaaaaaaacgtgaaattgttttggcttgtttaggaggtgggcatactgccaa	ssl-miR394	TTGGCATTCTGTCCACCTCC	3'	Yes	gp2b	...((((..(((............((((..(((((..((....))...)))))...))))....(((((((.....))))))))))..)))).......	89	43.4	-18.6	0.4	2234.5	332	32	36.5	948	144.5	48.5	235.5	4892.5	910.5	308.5	23.5	137	2900	47	56	2986.83	603.461	52.0934	37.1577	708.682	154.906	30.2165	146.483	5045.97	946.791
29	26	ssl-miR397_1ss2CA	TAATTGAGTGCAGCGTTGATG	21	PJS-298-T7	-	37	141	atatcagtgactattagaatagtataactagtatcaacggcaacaacagtcttgttgtggtttgctatcttgaaaaagaactggTTATTGAGTGCAGCGTTGATG	22	ssl-MIR397,csi-MIR397,lja-MIR397,rco-MIR397,sly-MIR397,tcc-MIR397,bna-MIR397a,bna-MIR397b,lus-MIR397a,lus-MIR397b,nta-MIR397,vvi-MIR397a,ppe-MIR397,aly-MIR397a,aly-MIR397b,mdm-MIR397a,mdm-MIR397b,ath-MIR397a,ptc-MIR397a,gma-MIR397a,gma-MIR397b,mtr-MIR397,	ssl-MIR397	TCATTGAGTGCAGCGTTGATGacatcggcattcgtccttttccttcgtctccgactgtcgtttcattgacgctgcactcaata	ssl-miR397	TCATTGAGTGCAGCGTTGATG	3'	Diff	gp2b	...((((((((((...............(((((..(((..((((((.....))))))..))))))))((((....))))..))))))))))..............	88	36.2	-22.7	0.6	0	9	0	0	0	0	9	0	20	33	14	0	27	0	0	11	0	16.3589	0	0	0	0	5.60719	0	20.6274	34.3153
30	27	bol-miR398a-3p	TGTGTTCTCAGGTCACCCCTT	21	comp51375_c0	+	7	161	ctgaagcataccccagaggtgtgaacatgagaacacacactgtgattttgggtttggttgcttttaaatctcagtctcttcctctttttctttctctttctctttctcaatatcacaatgTGTGTTCTCAGGTCACCCCTTtggggcacttctgt	28	bol-MIR398a,ssl-MIR398,ahy-MIR398,hbr-MIR398,aqc-MIR398a,csi-MIR398,rco-MIR398a,ghr-MIR398,tcc-MIR398b,bra-MIR398,lus-MIR398b,lus-MIR398e,lus-MIR398a,lus-MIR398d,lus-MIR398c,nta-MIR398,vvi-MIR398a,aly-MIR398a,aly-MIR398b,mdm-MIR398a,gra-MIR398,ath-MIR398a,ath-MIR398b,ath-MIR398c,ptc-MIR398a,gma-MIR398b,gma-MIR398a,mtr-MIR398a,	bol-MIR398a	tctcaaaGGAGTGTCATGAGAACACGGAtcctcttgtttctttaagatttccactgaaaccattgagtatTGTGTTCTCAGGTCACCCCTTtgaa	bol-miR398a-3p	TGTGTTCTCAGGTCACCCCTT	3'	Yes	gp2b	..((((....(((((((((.((((...((((((((((((.((((((.(((((...((((.......))))..((.......))......................))))).)))))).))))))))))))..)))).)))))))))..))))...	150	42.6	-57.6	0.9	2619	1585	8	0	183	598	0	236	16785	4730	18	8	66	4220	8	0	3500.79	2880.98	13.0233	0	136.802	641.063	0	146.794	17311.5	4918.53
31	28	aqc-miR399	TGCCAAAGGAGAGTTGCCCTA	21	FS958856	+	42	148	caataagcgaaccagttatagggcaacactccaacggcagctgttcctagtctttgggacgatcagtTGCCAAGGGAGAGTTGCCCTAcaattgcttcagcttaata	6	aqc-MIR399,csi-MIR399b,sly-MIR399,mdm-MIR399d,stu-MIR399i,ptc-MIR399i,	aqc-MIR399	gtcgtagggcttctccctgttggcagatgataatggcttagttctttcctgatcgagtgcctttaattatcTGCCAAAGGAGAGTTGCCCTAtgacta	aqc-miR399	TGCCAAAGGAGAGTTGCCCTA	3'	Yes	gp2b	...((((((((.(((((.(((((((((.((((...((((((((.((((((...))))))....))))))))...)))).))))))))).))))).))).)))))...	101	47.7	-52.5	1	0	0	0	0	38	0	0	0	0	0	0	0	42	22	0	0	0	0	0	0	28.4071	0	0	0	0	0
32	29	rco-MIR403a-p5_1ss2TG	CGAGTTTGTGTGTGAATCTAA	21	L2BF1	+	1	111	CGAGTTTGTGTGTGAATCTAAtggaatttcatttcatctttgagcagacactttagttcacgactccataccacaggggttcttgtcttcatgttgtctgagaatcattta	1	rco-MIR403a,	rco-MIR403a	tctctagtttgtgtgtgaatctaattcaggccatccatgtcagggccctactaatcctatcccatggtgTTAGATTCACGCACAAACTCGtgatc	rco-MIR403a-p5	ctagtttgtgtgtgaatctaa	5'	New	gp2b	...........((((.((..(((((((...))))))).......(((((((...((.....((((((........)))))).....))....).)))))).)).))))...	97	38.7	-19.7	0.5	0	5	0	0	0	0	0	0	0	0	0	0	0	0	0	0	0	9.08828	0	0	0	0	0	0	0	0
33	30	rco-MIR403a-p3_1ss2TG	CGAGTTTGTGTGTGAATCTAA	21	comp66860_c0	+	646	704	gaacgcaattcaacctcctttcctaagcaaccagtaaaCGAGTTTGTGTGTGAATCTAA	1	rco-MIR403a,	rco-MIR403a	tctctagtttgtgtgtgaatctaattcaggccatccatgtcagggccctactaatcctatcccatggtgTTAGATTCACGCACAAACTCGtgatc	rco-MIR403a-p3	ctagtttgtgtgtgaatctaa	3'	New	gp2b	...((((...(((.(((.(((.((........)).))).))).)))..)))).......	49	40.7	-8.7	0.4	0	5	0	0	0	0	0	0	0	0	0	0	0	0	0	0	0	9.08828	0	0	0	0	0	0	0	0
34	31	dpr-miR408_L-1	TGCACTGCCTCTTCCCTGGC	20	FS959006	-	86	140	atcaggcacagcaccaccgccgccgccgccaccacTGCACTGCCTCTTCCCTGGG	25	dpr-MIR408,vun-MIR408,ahy-MIR408,hbr-MIR408b,hbr-MIR408a,cca-MIR408,csi-MIR408,rco-MIR408,cpa-MIR408,lus-MIR408a,mes-MIR408,nta-MIR408,vvi-MIR408,aly-MIR408,mdm-MIR408a,mdm-MIR408b,mdm-MIR408d,stu-MIR408b,ath-MIR408,ptc-MIR408,gma-MIR408a,gma-MIR408b,gma-MIR408c,gma-MIR408d,mtr-MIR408,	dpr-MIR408	ggagagacggggacgagacagagcatggcaagggaaaaagaaaatggacttatttgctttgccctttccCTGCACTGCCTCTTCCCTGGCtctcc	dpr-miR408	CTGCACTGCCTCTTCCCTGGC	3'	Diff	gp2b	...(((((..(((.....((.......))......)))..)))))..........	42	70.9	-8.8	0.2	0	0	0	0	0	0	0	0	11	0	50	0	0	22	0	0	0	0	0	0	0	0	0	0	11.3451	0
35	32	aly-MIR472-p3_2ss6TG18AG	TTTCCGACTCCGCCCATGCCAT	22	comp63308_c0	+	22	202	ttggagaaagcggaaagggagcaaaagagctttcggaatcttgcggtatgggcgaggcggtaagagagagttctctcgatgatcgattgagttctctcgatgatcgattgattgatactcTTTCCGACTCCGCCCATGCCATtggattccgattcctcctccctctcctcctccctcctct	2	aly-MIR472,ath-MIR472,	aly-MIR472	ccaagggggagtcatattctcatcaaagatggattcggggttacgcctctgtatgtATGGTCGAAGTAGGCAAAATCtcacctttctagcagatcaacaatagatgcttgatttataaaggttgtggtgtttgaaagtgttgagatccgcaagatttgagtaagaTTTTTCCTACTCCGCCCATACCatgcatacacctaatcctgagtccatctctgatgggttactattgg	aly-MIR472-p3	TTTCCTACTCCGCCCATACCat	3'	New	gp2b	..((((..((.(((.((((((.....(((...(((((((((...((((((((((..((((....(((((((((..(((((((((.((((((....)))))))))).)))))..)).)))))))))).)..))))))))))...)))))))))...))))))))).)))..))..))))...	176	51.4	-85.9	0.9	6696	9684	938	4649	19118	4466	9936	23659	21924	14885	24660	364	9192	31746	7366	7302	8950.46	17602.2	1526.99	4732.77	14291.7	4787.6	6190.34	14716.1	22611.7	15478.3
36	33	mes-MIR477g-p5_1ss1CT	TCCTCAAAGGCTTCCAATATT	21	TL015D08	-	294	350	TCCTCAAAGGCCTCCAATATTgaaaccagcacatcttgccctttcttgcaggtcacc	2	mes-MIR477g,mes-MIR477f,	mes-MIR477g	gacactgacattgctagaatggttagagaagcttccaATCTCCCTCAAAGGCTTCCAatattccaggccatggaaatgttggagacctttggaggggattgaaggcttactctcccatcatttaatgcaagcatagtttc	mes-MIR477g-p5	CCCTCAAAGGCTTCCAatatt	5'	New	gp2b	........(((((.(((....((((...(((.....)))..))))))).)))))...	46	49.1	-10.2	0.4	0	0	0	0	162	31	0	0	0	0	0	0	125	95	0	0	0	0	0	0	121.104	33.2324	0	0	0	0
37	34	vun-MIR482-p5_2ss17CT18TC	AAATTGTGGGAATGGGTCGATTGG	24	comp26132_c0	+	1	202	tagatgagagagagcgagtgaaaaaggagtaagagggagagggaaatagactaacaagAAATTGTGGGAATGGGTCGATTGGgaaggaattcttttggtgggtattgccaaacgaaatccTTTCCTAAACCACCCATTCCTCtgatttcttgatgtttttctctctccctttcttgtcctggtcctatatccagtcatccca	3	vun-MIR482,vvi-MIR3633a,ppe-MIR482a,	vun-MIR482	tcagaaattgtgggaatgggctgattgggaagcaatgaaatcatctcaagtgattgtgcgtaatttTCTTCCCAATTCCGCCCATTCCTAtgatttctga	vun-MIR482-p5	aaattgtgggaatgggctgattgg	5'	New	gp2b	..(((((....((...((.((...((((.(((((((((((((((((..(((...(((((((((..((((((((((.....((((((((.(((.(((((..(...)..))))).))).))))))))......))))))))))..)))))))))..)))))))))))))))..)))))))))..))))...))...)))))...	197	43.1	-86.9	1	10	5	0	0	12	0	0	0	9.5	6.5	0	0	23	7.5	0	0	13.3669	9.08828	0	0	8.97065	0	0	0	9.798	6.75908
37	35	ppe-MIR482a-p3_3ss12TA21AT22AC	TTTCCGAAACCACCCATTCCTC	22	comp26132_c0	+	1	202	tagatgagagagagcgagtgaaaaaggagtaagagggagagggaaatagactaacaagAAATTGTGGGAATGGGTCGATTGGgaaggaattcttttggtgggtattgccaaacgaaatccTTTCCTAAACCACCCATTCCTCtgatttcttgatgtttttctctctccctttcttgtcctggtcctatatccagtcatccca	3	vun-MIR482,vvi-MIR3633a,ppe-MIR482a,	ppe-MIR482a	aagaggaaatggaaatttttGGGTGAGAGGTTGCCGGAAAGAatacataatattcatccaagttttgatattaaattcTTTCCGAAACCTCCCATTCCAAtgatttccagctattccttt	ppe-MIR482a-p3	TTTCCGAAACCTCCCATTCCAA	3'	New	gp2b	..(((((....((...((.((...((((.(((((((((((((((((..(((...(((((((((..((((((((((.....((((((((.(((.(((((..(...)..))))).))).))))))))......))))))))))..)))))))))..)))))))))))))))..)))))))))..))))...))...)))))...	197	43.1	-86.9	1	0	0	0	14	0	0	4.5	0	0	0	0	0	0	7	0	0	0	0	0	14.2523	0	0	2.80359	0	0	0
38	34	vun-MIR482-p5_2ss17CT18TC	AAATTGTGGGAATGGGTCGATTGG	24	N3E4E3_A186_TRA_2856	+	4	204	cgggggagagagagcgagtgaaaaaggagtaagagggagagggaaatagactaacaagAAATTGTGGGAATGGGTCGATTGGgaaggaattcctttgggtattgccaaacgaaatcctttcctaaaccacccactcctctgatttcttgatgtttttctctctccctttcttgtcctggtcctatatccagtcatcccaat	1	vun-MIR482,	vun-MIR482	tcagaaattgtgggaatgggctgattgggaagcaatgaaatcatctcaagtgattgtgcgtaatttTCTTCCCAATTCCGCCCATTCCTAtgatttctga	vun-MIR482-p5	aaattgtgggaatgggctgattgg	5'	New	gp2b	...((((((..((...((.((...((((.(((((((((((((((((..(((...(((((((((..((((.(((((.....((((((((.(((.(((((......))))).))).))))))))......))))).))))..)))))))))..)))))))))))))))..)))))))))..))))...))...)).))))...	195	45.3	-84.3	0.9	10	5	0	0	12	0	0	0	9.5	6.5	0	0	23	7.5	0	0	13.3669	9.08828	0	0	8.97065	0	0	0	9.798	6.75908
39	35	ppe-MIR482a-p3_3ss12TA21AT22AC	TTTCCGAAACCACCCATTCCTC	22	TL008A03	+	161	296	agagggagggggaaatagactaacaagaaattgtgggaatgggtcgatgggaaggaattccttgggtattgccaaacgaaatccTTTCCTAAACCACCCATTCCTCtgatttcttgatgtttttctctctcccttt	3	vvi-MIR3633a,ppe-MIR482f,ppe-MIR482a,	ppe-MIR482a	aagaggaaatggaaatttttGGGTGAGAGGTTGCCGGAAAGAatacataatattcatccaagttttgatattaaattcTTTCCGAAACCTCCCATTCCAAtgatttccagctattccttt	ppe-MIR482a-p3	TTTCCGAAACCTCCCATTCCAA	3'	New	gp2b	(((((((((((((((..(((...(((((((((..((((((((((....((((((((.(((.((((......))))..))).))))))))......))))))))))..)))))))))..))))))))))))))))))	136	43.4	-66.8	1.1	0	0	0	14	0	0	4.5	0	0	0	0	0	0	7	0	0	0	0	0	14.2523	0	0	2.80359	0	0	0
40	36	gra-MIR482d-p3_2ss13CT17CT	TATATACACACATACATACACA	22	comp15695_c0	+	156	188	aaagttgtataTATATACACATATACATACACA	2	gra-MIR482d,gra-MIR482d,	gra-MIR482d	actggaaatttttggaagtggggtgcgaggaaagatcatttctcttctctcttatatatatacacacacacacacacacacacatacaaagagatcaaaccagatcTTTCCTATGCCCCCCATTCCACtgatttctag	gra-MIR482d-p3	tatatacacacacacacacaca	3'	New	gp2b	...(((((((((........))))))).))...	27	21.2	-4.8	0.7	0	0	0	0	0	0	0	0	0	0	0	0	5.5	0	0	0	0	0	0	0	0	0	0	0	0	0
41	36	gra-MIR482d-p3_2ss13CT17CT	TATATACACACATACATACACA	22	comp7197_c0	-	107	157	ggttgaagattcaacgaattagggttcttTATATACACACATACACACACA	1	gra-MIR482d,	gra-MIR482d	actggaaatttttggaagtggggtgcgaggaaagatcatttctcttctctcttatatatatacacacacacacacacacacacatacaaagagatcaaaccagatcTTTCCTATGCCCCCCATTCCACtgatttctag	gra-MIR482d-p3	tatatacacacacacacacaca	3'	New	gp2b	.(((((....)))))....................................	1	35.3	-4	0.2	0	0	0	0	0	0	0	0	0	0	0	0	5.5	0	0	0	0	0	0	0	0	0	0	0	0	0
42	37	ppe-miR482c-3p_2ss9CG21AG	TTCCCAAGGCCGCCCATTCCGA	22	comp412133_c0	+	44	202	ttagaacttctgggagttataggaatggggttgccagggaagaaaataaagtcaattcgaggggttgatttgcaataaagagaaaggtatgggacttgagaactatattttatctttcTTCCCAAGGCCGCCCATTCCGAtgatttccagttgttcctc	2	ppe-MIR482c,mdm-MIR482a,	ppe-MIR482c	tggagctactgggaattgtaGGAATGGGCTGTTTGGGATGaaagaaaatcactaagaaaattttcttgttgatattttcTTCCCAAGCCCGCCCATTCCAAtgatttctagcggctcctcc	ppe-miR482c-3p	TTCCCAAGCCCGCCCATTCCAA	3'	Diff	gp2b	...((((..(((((((((((.((((((((...(((.((((((((....(((((((..(...)..))))))).......(((..((..(((((..........)))))..)).)))))))))))..)))..)))))))).)))))))))))..))))...	153	41.5	-61.4	0.9	434	542	201	362	973	549	650	1425	1077	701	1629	29	736	1747	579	479	580.122	985.169	327.212	368.523	727.371	588.534	404.964	886.363	1110.78	728.941
43	38	mes-MIR482-p3_2ss9TG21AG	TTCCCTACGCCACCCATTCCGT	22	comp48619_c0	+	1	121	gcaagaaattgtgggaatggagtgagtggggatggaaattccttttttattggtgggtaaaagatggatttattttctagggatccTTCCCTACGCCACCCATTCCGTtgatttcttggtt	1	mes-MIR482,	mes-MIR482	ggagaaaaagcaaggattttcggaaggttatgagatgggtaagtggggaagataactgtggggctttcgttttgtttgttaTCTTCCCTACTCCACCCATTCCatagctttccgatcgttcctctctctcc	mes-MIR482-p3	TTCCCTACTCCACCCATTCCat	3'	New	gp2b	.(((((((((...(((((((.(((.(((((((.(((...(((((((((((......)))))))).))).......((....))))).)))))))..))))))))))...)))))))))...	117	42.1	-46.4	0.9	1816	1377	938	1814	2842	1199	2639	5428	5294	3070	3760	163	1517	7880	2232	3962	2427.42	2502.91	1526.99	1846.68	2124.55	1285.34	1644.15	3376.26	5460.07	3192.37
44	39	ssl-miR828	TCTTGCTCAAATGAGTATTCCA	22	comp278197_c0	-	63	142	gtctttgagcctaattctcctcttgatccttcattttgtttctccatttgatttatttTCTTGCTCAAATGAGAATTCCA	11	ssl-MIR828,mes-MIR828b,mes-MIR828a,vvi-MIR828a,ppe-MIR828,mdm-MIR828a,mdm-MIR828b,ptc-MIR828a,ptc-MIR828b,gma-MIR828b,gma-MIR828a,	ssl-MIR828	TCTTGCTCAAATGAGTATTCCAaagagatgcagaatgctatggtttgttaatccgtagaatattcttgtgtttctgtgtatcagtttggaagtgcatctgcttctgagatgctcatttgggcaaag	ssl-miR828	TCTTGCTCAAATGAGTATTCCA	3'	Yes	gp2b	(((...(((..........)))..)))............((((.(((((((.............))))))))))).....	36	33.8	-8.5	0.3	59.5	87	0	0	49	31.5	0	0	125	118	0	11.5	35	37.5	0	0	79.5329	158.136	0	0	36.6302	33.7684	0	0	128.921	122.703
45	39	ssl-miR828	TCTTGCTCAAATGAGTATTCCA	22	comp58447_c0	-	107	142	cttcactccgagctTCTTGCTCAAATGAGTGTTCCA	11	ssl-MIR828,mes-MIR828a,mes-MIR828b,vvi-MIR828a,ppe-MIR828,mdm-MIR828b,mdm-MIR828a,ptc-MIR828b,ptc-MIR828a,gma-MIR828b,gma-MIR828a,	ssl-MIR828	TCTTGCTCAAATGAGTATTCCAaagagatgcagaatgctatggtttgttaatccgtagaatattcttgtgtttctgtgtatcagtttggaagtgcatctgcttctgagatgctcatttgggcaaag	ssl-miR828	TCTTGCTCAAATGAGTATTCCA	3'	Yes	gp2b	...(((((.((((.....))))....))))).....	28	47.2	-10.5	0.6	59.5	87	0	0	49	31.5	0	0	125	118	0	11.5	35	37.5	0	0	79.5329	158.136	0	0	36.6302	33.7684	0	0	128.921	122.703
46	40	gma-MIR828a-p3_2ss3AC18CA	GCCTGAATATTGTGTGCA	18	comp655791_c0	+	192	226	aagcaggctaaaacttcGCCTGAATATTGTGTGCA	1	gma-MIR828a,	gma-MIR828a	ttgtaatgttTCTTGCTCAAATGAGTATTCCAaccacagtcacatttggcatgaatattgtgtgccactgtcctcaaaggatgagatgctcatttgaccaagcaatgttaaaa	gma-MIR828a-p3	gcatgaatattgtgtgcc	3'	New	gp2b	...(((((.........))))).............	19	42.9	-7.2	0.5	0	19	0	0	0	0	0	0	0	0	0	0	0	0	0	0	0	34.5354	0	0	0	0	0	0	0	0
47	41	mtr-MIR2586a-p3_1ss15TC	CTATGAAGCACGGACACGGACACG	24	comp233575_c0	+	131	208	gatgtgttttgttggagttttctgaagtagtttttagtactcaaagTTATGAAGCACGGACACGGACACGggacacgg	1	mtr-MIR2586a,	mtr-MIR2586a	atgacaacctatgaagcacggatacggacacggacaccggacacgacacagacacgccgacacaactaataatttgaaaatatcacattatctggtgtaattacaagtgtcggtgtcatgtcggtatcggacacgacacgtgtccgacactgggacacgcctaatcCGAGGAGTGTCCGTGCTTCATagatgacaa	mtr-MIR2586a-p3	ctatgaagcacggatacggacacg	3'	New	gp2b	..((((((..((..((((...((((((....)))))).))))..............((....))...))..)))))).	75	43.6	-16.4	0.5	6.5	4.5	0	4.5	0	5.5	8	0	8.5	15.5	0	0	0	6.5	5.5	4	8.68847	8.17945	0	4.58108	0	5.89606	4.98417	0	8.76663	16.1178
48	42	mtr-MIR2586a-p3_1ss10TC	AAGCACGGACACGGACACGGACAC	24	comp26524_c0	-	121	177	caaccaacatatgcttttgcatattccctaagAAGCATGGACACGGACACGGACACg	1	mtr-MIR2586a,	mtr-MIR2586a	atgacaacctatgaagcacggatacggacacggacaccggacacgacacagacacgccgacacaactaataatttgaaaatatcacattatctggtgtaattacaagtgtcggtgtcatgtcggtatcggacacgacacgtgtccgacactgggacacgcctaatcCGAGGAGTGTCCGTGCTTCATagatgacaa	mtr-MIR2586a-p3	aagcacggatacggacacggacac	3'	New	gp2b	...((....(((((((((............))))))))).....))...........	43	47.4	-9.1	0.3	14	9	4.5	13.5	14.5	12.5	49	15.5	22	32.5	21	0	17.5	19	20	27	18.7136	16.3589	7.32563	13.7432	10.8395	13.4001	30.528	9.64114	22.6901	33.7954
49	43	mtr-MIR2586a-p5_1ss10TC	AAGCACGGACACGGACACGGACAC	24	comp49900_c0	-	100	177	ctatgAAGCACGGACACGGACACGGACACgaacacgcatacggacacggacacggacacggacacgggacacggtaat	1	mtr-MIR2586a,	mtr-MIR2586a	atgacaacctatgaagcacggatacggacacggacaccggacacgacacagacacgccgacacaactaataatttgaaaatatcacattatctggtgtaattacaagtgtcggtgtcatgtcggtatcggacacgacacgtgtccgacactgggacacgcctaatcCGAGGAGTGTCCGTGCTTCATagatgacaa	mtr-MIR2586a-p5	aagcacggatacggacacggacac	5'	New	gp2b	.((((.....((....((....))....))......))))((....((....((....))....)).....)).....	39	59	-8.1	0.2	14	9	4.5	13.5	14.5	12.5	49	15.5	22	32.5	21	0	17.5	19	20	27	18.7136	16.3589	7.32563	13.7432	10.8395	13.4001	30.528	9.64114	22.6901	33.7954
50	44	mtr-MIR2586a-p5_2ss1CA22CG	ACGGACACGACACAGACACGCGGA	24	comp56585_c0	+	212	275	acACGGACACGACACAGACACGCGGAcacgcaatttttcaaaaaatgggggacacgacacgctg	1	mtr-MIR2586a,	mtr-MIR2586a	atgacaacctatgaagcacggatacggacacggacaccggacacgacacagacacgccgacacaactaataatttgaaaatatcacattatctggtgtaattacaagtgtcggtgtcatgtcggtatcggacacgacacgtgtccgacactgggacacgcctaatcCGAGGAGTGTCCGTGCTTCATagatgacaa	mtr-MIR2586a-p5	ccggacacgacacagacacgccga	5'	New	gp2b	...((....))...(((....(((....)))..((..(((.....)))..)).........)))	50	53.1	-7.2	0.2	18	0	8	21	30	9	41	53	29	18	68	0	25	48	35	67	24.0604	0	13.0233	21.3784	22.4266	9.6481	25.5439	32.9665	29.9097	18.7175
51	45	mtr-MIR2586a-p3_2ss4TG21CT	CTAGGAAGCACGGATACGGATACG	24	comp58726_c0	-	201	289	ggcgtaaagtgtgaaaaaggaaaaattttgaattttttttttcctcctctgtttagcatgataaaCTAGGAAGCACGGATACGGATACG	1	mtr-MIR2586a,	mtr-MIR2586a	atgacaacctatgaagcacggatacggacacggacaccggacacgacacagacacgccgacacaactaataatttgaaaatatcacattatctggtgtaattacaagtgtcggtgtcatgtcggtatcggacacgacacgtgtccgacactgggacacgcctaatcCGAGGAGTGTCCGTGCTTCATagatgacaa	mtr-MIR2586a-p3	ctatgaagcacggatacggacacg	3'	New	gp2b	..((((..((((.....((((((((............))))))))(((..(((((......))))).)))..))))...))))......	81	36	-18.8	0.6	123	73	0	0	0	0	0	0	150	175	22	0	0	0	0	0	164.413	132.689	0	0	0	0	0	0	154.705	181.975
52	46	mtr-MIR2592bj-p3_2ss12TC19AT_1	ATTCCCACTGTCCCTGTCT	19	FS952722	+	19	87	tcagtgacgcgcatgaatggattaacgagATTCCCACTGTCCCTGTCTactatccagcgaaaccacagc	2	mtr-MIR2592bj,mtr-MIR2592bi,	mtr-MIR2592bj	ccaatatttgaccggaattcccactgttcctgtcaaaagattaaattcttgttaggctgatttaaatgaaggtattgaagtgtcaaggaatggacctcattcttttcacatttgaataccatcatttaatcccaacctaacaagaatttaatcttttgaaTGGAACATTGGGAATGCCGGTcgaatattgg	mtr-MIR2592bj-p3	attcccactgttcctgtca	3'	New	gp2b	...(((...(((.....(((((.....((((.............))))...))))))))....)))...	63	50.7	-11.6	0.3	0	0	0	0	0	0	0	5.5	0	0	0	0	0	24	0	0	0	0	0	0	0	0	0	3.42105	0	0
53	46	mtr-MIR2592bj-p3_2ss12TC19AT_1	ATTCCCACTGTCCCTGTCT	19	Tea217_2006-02-14_1/Tea217_B05_023_1	+	20	146	aagcgcgggtaaacggcgggagtaactatgactctcttaaggtagccaaatgcctcgtcatctaattagtgacgcgcatgaatggattaacgagATTCCCACTGTCCCTGTCTactatccagcgaaa	2	mtr-MIR2592bj,mtr-MIR2592bi,	mtr-MIR2592bj	ccaatatttgaccggaattcccactgttcctgtcaaaagattaaattcttgttaggctgatttaaatgaaggtattgaagtgtcaaggaatggacctcattcttttcacatttgaataccatcatttaatcccaacctaacaagaatttaatcttttgaaTGGAACATTGGGAATGCCGGTcgaatattgg	mtr-MIR2592bj-p3	attcccactgttcctgtca	3'	New	gp2b	...((((((((...((((((..((.....((.((((((((..((.....((((..((((((.......)))))).))))...))..)))).)))).))....))..))))))...))))).)))...	121	48	-35.2	0.6	0	0	0	0	0	0	0	5.5	0	0	0	0	0	24	0	0	0	0	0	0	0	0	0	3.42105	0	0
54	47	mtr-MIR2592bj-p3_2ss12TC19AT_2	ATTCCCACTGTCCCTGTCTA	20	FS960635	+	19	87	ttagtgacgcgcatgaatggattaacgagATTCCCACTGTCCCTGTCTActatccagcgaaaccacagc	2	mtr-MIR2592bj,mtr-MIR2592bi,	mtr-MIR2592bj	ccaatatttgaccggaattcccactgttcctgtcaaaagattaaattcttgttaggctgatttaaatgaaggtattgaagtgtcaaggaatggacctcattcttttcacatttgaataccatcatttaatcccaacctaacaagaatttaatcttttgaaTGGAACATTGGGAATGCCGGTcgaatattgg	mtr-MIR2592bj-p3	attcccactgttcctgtcaa	3'	New	gp2b	...(((...(((.....(((((.....((((.............))))...))))))))....)))...	63	49.3	-11.6	0.3	0	0	0	0	0	0	0	5.5	0	0	0	0	0	24	0	0	0	0	0	0	0	0	0	3.42105	0	0
55	47	mtr-MIR2592bj-p3_2ss12TC19AT_2	ATTCCCACTGTCCCTGTCTA	20	comp68561_c0	+	4721	4847	aagcgcgggtaaacggcgggagtaactatgactctcttaaggtagccaaatgcctcgtcatctaattagtgacgcgcatgaatggattaacgagATTCCCACTGTCCCTGTCTActatccagcgaaa	2	mtr-MIR2592bj,mtr-MIR2592bi,	mtr-MIR2592bj	ccaatatttgaccggaattcccactgttcctgtcaaaagattaaattcttgttaggctgatttaaatgaaggtattgaagtgtcaaggaatggacctcattcttttcacatttgaataccatcatttaatcccaacctaacaagaatttaatcttttgaaTGGAACATTGGGAATGCCGGTcgaatattgg	mtr-MIR2592bj-p3	attcccactgttcctgtcaa	3'	New	gp2b	...((((((((...((((((..((.....((.((((((((..((.....((((..((((((.......)))))).))))...))..)))).)))).))....))..))))))...))))).)))...	121	48	-35.2	0.6	0	0	0	0	0	0	0	5.5	0	0	0	0	0	24	0	0	0	0	0	0	0	0	0	3.42105	0	0
56	48	gma-MIR4393b-p3_2ss9AG18AG	AAAACGACGTCGTTTTGGAGG	21	comp38652_c0	+	21	144	ttggaatccggatcctccgtcgcactctcctgcggcactgtcctgtcgccctccAAAACGACGTCGTTTTGGAGGgcgacagaaatgagctgcagcggagtgcaacggaggatccagattcaat	1	gma-MIR4393b,	gma-MIR4393b	ttgacttctctgctatcccttttcaagttgtccccatgctttcccttcaaaacgacatcgttttgaagggaaagcacagggaaagcTTGAAAAGGGACAGCAGAGAAGCCaa	gma-MIR4393b-p3	aaaacgacatcgttttgaagg	3'	New	gp2b	...(((((.(((((((((((.((((((..(((((((......((((((((((((((((((....))))))))))))))))))......)))))))..)))))).))))))))))).)))))...	118	57.3	-91.4	1.3	0	0	0	0	0	0	0	0	0	0	0	0	0	5	0	0	0	0	0	0	0	0	0	0	0	0
57	48	gma-MIR4393b-p3_2ss9AG18AG	AAAACGACGTCGTTTTGGAGG	21	comp38652_c0	-	67	190	attgaatctggatcctccgttgcactccgctgcagctcatttctgtcgccctccAAAACGACGTCGTTTTGGAGGgcgacaggacagtgccgcaggagagtgcgacggaggatccggattccaa	1	gma-MIR4393b,	gma-MIR4393b	ttgacttctctgctatcccttttcaagttgtccccatgctttcccttcaaaacgacatcgttttgaagggaaagcacagggaaagcTTGAAAAGGGACAGCAGAGAAGCCaa	gma-MIR4393b-p3	aaaacgacatcgttttgaagg	3'	New	gp2b	...((((((((((((((((((((((((..((((.((....((((((((((((((((((((....))))))))))))))))))))....)).))))..))))))))))))))))))))))))...	118	57.3	-96	1.4	0	0	0	0	0	0	0	0	0	0	0	0	0	5	0	0	0	0	0	0	0	0	0	0	0	0
58	49	stu-MIR5303j-p5_2ss10GT17CT	ATTCAAATTTCTGCCCTA	18	FS958010	+	37	131	cgacgcatcATTCAAATTTCTGCCCTAtcaactttcgatggtaggatagtggcctactatggtggtgacgggtgacggagaattagggttcgatt	1	stu-MIR5303j,	stu-MIR5303j	gctcggactattcaaattgctgccccaccctgtgtaagatcctccaaaaatgactacttttgaaggattaaacacgcatccggcAATATTTTTGAAGAGTCTGAGCAA	stu-MIR5303j-p5	attcaaattgctgcccca	5'	New	gp2b	...((.(((.......((((((.((..((.(((..(.((((((((.......)))))))))..)))))..))...)))))).....))).))...	89	47.4	-22.8	0.5	0	0	0	0	0	0	0	0	0	0	0	0	6.5	0	0	0	0	0	0	0	0	0	0	0	0	0
59	49	stu-MIR5303j-p5_2ss10GT17CT	ATTCAAATTTCTGCCCTA	18	comp68561_c0	+	309	383	ATTCAAATTTCTGCCCTAtcaactttcgatggtaggatagtggcctactatggtggtgacgggtgacggagaatt	1	stu-MIR5303j,	stu-MIR5303j	gctcggactattcaaattgctgccccaccctgtgtaagatcctccaaaaatgactacttttgaaggattaaacacgcatccggcAATATTTTTGAAGAGTCTGAGCAA	stu-MIR5303j-p5	attcaaattgctgcccca	5'	New	gp2b	.......((((((.((..((.(((..(.((((((((.......)))))))))..)))))..))...))))))...	65	45.3	-21.1	0.6	0	0	0	0	0	0	0	0	0	0	0	0	6.5	0	0	0	0	0	0	0	0	0	0	0	0	0
60	50	gma-MIR5368-p3_1ss16CT_3	AATTCTAACCTTGTGTCAGGACC	23	FS945719	+	304	479	tttactgttccctgggattggctttgggcctttcctgcgcagcttaggtggagggcgaagaaggcccccttccgggggggcccgagccatcagtgagataccactctggaagagctagAATTCTAACCTTGTGTCAGGACCtacgggccaagggacagtctcaggtagacagtttc	1	gma-MIR5368,	gma-MIR5368	actgtttcctgggattggctttgggctttcctgcacagcttaggtggagggcaaagaagacttccttctgagggggccagagccatcagagagataccactctggacgagctagaattctaaccttgtgccaggacctatgggccgagGGACAGTCTCAGGTAGACAgt	gma-MIR5368-p3	aattctaaccttgtgccaggacc	3'	New	gp2b	...((((((.((((((((((.((((((.((..((((((((((.(((((.....(((......((((((((....))))))))....(((..((((......)))).)))....))).....))))).).)))).))))).....)).))))))..))))))))))..))))))...	170	56.8	-76.2	0.8	0	0	0	7.5	5	0	4.5	20	0	0	0	9	0	0	13	17	0	0	0	7.63514	3.73777	0	2.80359	12.4402	0	0
61	50	gma-MIR5368-p3_1ss16CT_3	AATTCTAACCTTGTGTCAGGACC	23	FS960143	+	324	500	tttactgttccctgggattggctttgggcctttcctgcgcagcttaggtggagggcgaagaaggcccccttccgggggggcccgagccatcagtgagataccactctggaagaaaaattAATTCTAACCTTGTGTCAGGACCtacgggccaagggacagtctcaggtagacagtttc	1	gma-MIR5368,	gma-MIR5368	actgtttcctgggattggctttgggctttcctgcacagcttaggtggagggcaaagaagacttccttctgagggggccagagccatcagagagataccactctggacgagctagaattctaaccttgtgccaggacctatgggccgagGGACAGTCTCAGGTAGACAgt	gma-MIR5368-p3	aattctaaccttgtgccaggacc	3'	New	gp2b	...((((((.((((((((((.((((((.((..(((((((((....(((((((((((......((((((((....))))))))...)))...((((......))))................)))).)))))))).))))).....)).))))))..))))))))))..))))))...	171	54.8	-74.6	0.8	0	0	0	7.5	5	0	4.5	20	0	0	0	9	0	0	13	17	0	0	0	7.63514	3.73777	0	2.80359	12.4402	0	0
62	51	gma-MIR5368-p3_1ss16CT_1	AATTCTAACCTTGTGTCAGGA	21	FS946465	+	321	496	tttactgttccctgggattggctttgggcctttcctgcgcagcttaggtggagggcgaagaaggcccccttccgggggggcccgagccatcagtgagataccactctggaagagctagAATTCTAACCTTGTGTCAGGAcctacgggccaagggacagtctcaggtagacagtttc	1	gma-MIR5368,	gma-MIR5368	actgtttcctgggattggctttgggctttcctgcacagcttaggtggagggcaaagaagacttccttctgagggggccagagccatcagagagataccactctggacgagctagaattctaaccttgtgccaggacctatgggccgagGGACAGTCTCAGGTAGACAgt	gma-MIR5368-p3	aattctaaccttgtgccagga	3'	New	gp2b	...((((((.((((((((((.((((((.((..((((((((((.(((((.....(((......((((((((....))))))))....(((..((((......)))).)))....))).....))))).).)))).))))).....)).))))))..))))))))))..))))))...	170	56.8	-76.2	0.8	0	0	0	7.5	5	0	4.5	20	0	0	0	9	0	0	13	17	0	0	0	7.63514	3.73777	0	2.80359	12.4402	0	0
63	51	gma-MIR5368-p3_1ss16CT_1	AATTCTAACCTTGTGTCAGGA	21	FS953209	+	325	500	tttactgttccctgggattggctttgggcctttcctgcgcagcttaggtggagggcgaagaaggcccccttccgggggggcccgagccatcagtgagataccactctggaagagctagAATTCTAACCTTGTGTCAGGAcctacgggccaagggacagtctcaggtagacagtttc	1	gma-MIR5368,	gma-MIR5368	actgtttcctgggattggctttgggctttcctgcacagcttaggtggagggcaaagaagacttccttctgagggggccagagccatcagagagataccactctggacgagctagaattctaaccttgtgccaggacctatgggccgagGGACAGTCTCAGGTAGACAgt	gma-MIR5368-p3	aattctaaccttgtgccagga	3'	New	gp2b	...((((((.((((((((((.((((((.((..((((((((((.(((((.....(((......((((((((....))))))))....(((..((((......)))).)))....))).....))))).).)))).))))).....)).))))))..))))))))))..))))))...	170	56.8	-76.2	0.8	0	0	0	7.5	5	0	4.5	20	0	0	0	9	0	0	13	17	0	0	0	7.63514	3.73777	0	2.80359	12.4402	0	0
64	52	gma-MIR5368-p3_1ss4CA	GGAAGAGCTAGAATTCTAACCTTGT	25	FS946531	+	312	510	gaccctatgaagctttactgttccctgggattggctttgggcctttcctgcgcagcttaggtggagggcgaagaaggcccccttccgggggggcccgagccatcagtgagataccactctGGAAGAGCTAGAATTCTAACCTTGTgtcagtacctacgggccaagggacagtctcaggtagacagtttctatggggcgt	1	gma-MIR5368,	gma-MIR5368	actgtttcctgggattggctttgggctttcctgcacagcttaggtggagggcaaagaagacttccttctgagggggccagagccatcagagagataccactctggacgagctagaattctaaccttgtgccaggacctatgggccgagGGACAGTCTCAGGTAGACAgt	gma-MIR5368-p3	ggacgagctagaattctaaccttgt	3'	New	gp2b	..((((((((((((...(((...((((((((((.((((((.((....((((((((.(((((.....(((......((((((((....))))))))....(((..((((......)))).)))....))).....))))).).)))).))).......)).))))))..)))))))))))))..)))))).))))))...	194	56.3	-79.3	0.7	0	0	0	8.5	0	0	6	12.5	0	0	0	4.5	0	0	11.5	20.5	0	0	0	8.65315	0	0	3.73813	7.77511	0	0
65	52	gma-MIR5368-p3_1ss4CA	GGAAGAGCTAGAATTCTAACCTTGT	25	FS947600	+	276	474	gaccctatgaagctttactgttccctgggattggctttgggcctttcctgcgcagcttaggtggagggcgaagaaggcccccttccgggggggcccgagccatcagtgagataccactctGGAAGAGCTAGAATTCTAACCTTGTgtcatgacctacgggccaagggacagtctcaggtagacagtttctatggggcgt	1	gma-MIR5368,	gma-MIR5368	actgtttcctgggattggctttgggctttcctgcacagcttaggtggagggcaaagaagacttccttctgagggggccagagccatcagagagataccactctggacgagctagaattctaaccttgtgccaggacctatgggccgagGGACAGTCTCAGGTAGACAgt	gma-MIR5368-p3	ggacgagctagaattctaaccttgt	3'	New	gp2b	..((((((((((((...(((...((((((((((.((((((.((..((.(((((((.(((((.....(((......((((((((....))))))))....(((..((((......)))).)))....))).....))))).).)))).)).)).....)).))))))..)))))))))))))..)))))).))))))...	194	56.3	-78.2	0.7	0	0	0	8.5	0	0	6	12.5	0	0	0	4.5	0	0	11.5	20.5	0	0	0	8.65315	0	0	3.73813	7.77511	0	0
66	53	gma-MIR5368-p3_1ss17CT_1	GAATTCTAACCTTGTGTCAGGAC	23	FS946914	+	110	285	tttactgttccctgggattggctttgggcctttcctgcgcagcttaggtggagggcgaagaaggcccccttccgggggggcccgagccatcagtgagataccactctggaagagctaGAATTCTAACCTTGTGTCAGGACctacgggccaagggacagtctcaggtagacagtttc	1	gma-MIR5368,	gma-MIR5368	actgtttcctgggattggctttgggctttcctgcacagcttaggtggagggcaaagaagacttccttctgagggggccagagccatcagagagataccactctggacgagctagaattctaaccttgtgccaggacctatgggccgagGGACAGTCTCAGGTAGACAgt	gma-MIR5368-p3	gaattctaaccttgtgccaggac	3'	New	gp2b	...((((((.((((((((((.((((((.((..((((((((((.(((((.....(((......((((((((....))))))))....(((..((((......)))).)))....))).....))))).).)))).))))).....)).))))))..))))))))))..))))))...	170	56.8	-76.2	0.8	0	0	0	17	0	0	0	9.5	0	0	5	4.5	0	0	5	5.5	0	0	0	17.3063	0	0	0	5.90909	0	0
67	53	gma-MIR5368-p3_1ss17CT_1	GAATTCTAACCTTGTGTCAGGAC	23	FS947681	+	320	495	tttactgttccctgggattggctttgggcctttcctgcgcagcttaggtggagggcgaagaaggcccccttccgggggggcccgagccatcagtgagataccactctggaagagctaGAATTCTAACCTTGTGTCAGGACctacgggccaagggacagtctcaggtagacagtttc	1	gma-MIR5368,	gma-MIR5368	actgtttcctgggattggctttgggctttcctgcacagcttaggtggagggcaaagaagacttccttctgagggggccagagccatcagagagataccactctggacgagctagaattctaaccttgtgccaggacctatgggccgagGGACAGTCTCAGGTAGACAgt	gma-MIR5368-p3	gaattctaaccttgtgccaggac	3'	New	gp2b	...((((((.((((((((((.((((((.((..((((((((((.(((((.....(((......((((((((....))))))))....(((..((((......)))).)))....))).....))))).).)))).))))).....)).))))))..))))))))))..))))))...	170	56.8	-76.2	0.8	0	0	0	17	0	0	0	9.5	0	0	5	4.5	0	0	5	5.5	0	0	0	17.3063	0	0	0	5.90909	0	0
68	54	gma-MIR5368-p3_1ss17CT_2	GAATTCTAACCTTGTGTCAGGACC	24	FS947005	+	95	270	tttactgttccctgggattggctttgggcctttcctgcgcagcttaggtggagggcgaagaaggcccccttccgggggggcccgagccatcagtgagataccactctggaagagctaGAATTCTAACCTTGTGTCAGGACCtacgggccaagggacagtctcaggtagacagtttc	1	gma-MIR5368,	gma-MIR5368	actgtttcctgggattggctttgggctttcctgcacagcttaggtggagggcaaagaagacttccttctgagggggccagagccatcagagagataccactctggacgagctagaattctaaccttgtgccaggacctatgggccgagGGACAGTCTCAGGTAGACAgt	gma-MIR5368-p3	gaattctaaccttgtgccaggacc	3'	New	gp2b	...((((((.((((((((((.((((((.((..((((((((((.(((((.....(((......((((((((....))))))))....(((..((((......)))).)))....))).....))))).).)))).))))).....)).))))))..))))))))))..))))))...	170	56.8	-76.2	0.8	0	0	0	17	0	0	0	9.5	0	0	5	4.5	0	0	5	5.5	0	0	0	17.3063	0	0	0	5.90909	0	0
69	54	gma-MIR5368-p3_1ss17CT_2	GAATTCTAACCTTGTGTCAGGACC	24	FS956490	+	88	267	agctgtactgttccctgggattggctttgggcctttcctgcgcagcttaggtggagggcgaagaaggcccccttccgggggggcccgagccatcagtgagataccactctggaagagctaGAATTCTAACCTTGTGTCAGGACCtacgggccaagggacagtctcaggtagacagtttct	1	gma-MIR5368,	gma-MIR5368	actgtttcctgggattggctttgggctttcctgcacagcttaggtggagggcaaagaagacttccttctgagggggccagagccatcagagagataccactctggacgagctagaattctaaccttgtgccaggacctatgggccgagGGACAGTCTCAGGTAGACAgt	gma-MIR5368-p3	gaattctaaccttgtgccaggacc	3'	New	gp2b	((((((.(((...((((((((((.((((((.((..((((((((((.(((((.....(((......((((((((....))))))))....(((..((((......)))).)))....))).....))))).).)))).))))).....)).))))))..)))))))))))))))))))...	177	57.2	-76.7	0.7	0	0	0	17	0	0	0	9.5	0	0	5	4.5	0	0	5	5.5	0	0	0	17.3063	0	0	0	5.90909	0	0
70	55	gma-MIR5368-p3_1ss21CT	GCTAGAATTCTAACCTTGTGT	21	FS947097	+	324	499	tttactgttccctgggattggctttgggcctttcctgcgcagcttaggtggagggcgaagaaggcccccttccgggggggcccgagccatcagtgagataccactctggaagaGCTAGAATTCTAACCTTGTGTcaggacctacgggccaagggacagtctcaggtagacagtttc	1	gma-MIR5368,	gma-MIR5368	actgtttcctgggattggctttgggctttcctgcacagcttaggtggagggcaaagaagacttccttctgagggggccagagccatcagagagataccactctggacgagctagaattctaaccttgtgccaggacctatgggccgagGGACAGTCTCAGGTAGACAgt	gma-MIR5368-p3	gctagaattctaaccttgtgc	3'	New	gp2b	...((((((.((((((((((.((((((.((..((((((((((.(((((.....(((......((((((((....))))))))....(((..((((......)))).)))....))).....))))).).)))).))))).....)).))))))..))))))))))..))))))...	170	56.8	-76.2	0.8	0	0	0	5.5	0	0	0	17.5	0	0	6.5	0	0	0	13.5	22	0	0	0	5.5991	0	0	0	10.8852	0	0
71	56	gma-MIR5368-p3_1ss16CT_2	AATTCTAACCTTGTGTCAGGAC	22	FS947315	+	325	500	tttactgttccctgggattggctttgggcctttcctgcgcagcttaggtggagggcgaagaaggcccccttccgggggggcccgagccatcagtgagataccactctggaagagctagAATTCTAACCTTGTGTCAGGACctacgggccaagggacagtctcaggtagacagtttc	1	gma-MIR5368,	gma-MIR5368	actgtttcctgggattggctttgggctttcctgcacagcttaggtggagggcaaagaagacttccttctgagggggccagagccatcagagagataccactctggacgagctagaattctaaccttgtgccaggacctatgggccgagGGACAGTCTCAGGTAGACAgt	gma-MIR5368-p3	aattctaaccttgtgccaggac	3'	New	gp2b	...((((((.((((((((((.((((((.((..((((((((((.(((((.....(((......((((((((....))))))))....(((..((((......)))).)))....))).....))))).).)))).))))).....)).))))))..))))))))))..))))))...	170	56.8	-76.2	0.8	0	0	0	7.5	5	0	4.5	20	0	0	0	9	0	0	13	17	0	0	0	7.63514	3.73777	0	2.80359	12.4402	0	0
72	57	gma-MIR5368-p3_1ss15CT	ATTCTAACCTTGTGTCAGGACC	22	Tea209_2006-01-19_1/Tea209_D09_037_1	+	8	120	ctttcctgcgcagcttaggtggagggcgaagaaggcccccttccgggggggcccgagccatcagtgagataccactctggaagagctagaATTCTAACCTTGTGTCAGGACCt	1	gma-MIR5368,	gma-MIR5368	actgtttcctgggattggctttgggctttcctgcacagcttaggtggagggcaaagaagacttccttctgagggggccagagccatcagagagataccactctggacgagctagaattctaaccttgtgccaggacctatgggccgagGGACAGTCTCAGGTAGACAgt	gma-MIR5368-p3	attctaaccttgtgccaggacc	3'	New	gp2b	...((((((((((.(((((.....(((......((((((((....))))))))....(((..((((......)))).)))....))).....))))).)).))).)))))...	107	58.4	-43	0.7	0	0	0	5.5	0	0	0	4.5	0	0	6.5	0	0	0	4.5	10	0	0	0	5.5991	0	0	0	2.79904	0	0
73	58	ath-MIR5645b-p5_2ss19TG21TC	CAAAACGACGTCGTTTTGGCC	21	ZDSB107F	+	1	25	tCAAAACGACGTCGTTTTGGCCATT	1	ath-MIR5645b,	ath-MIR5645b	cgacaaataaatcgtaaacgttttgttgacttttgaaataaatgacaaagtttttgttgacttgtcATTTGAGTCATGTCGTTAAGtaggttaacataaaaaatttaagacgttaatgtctcgtttatctcctccgtaaaaacaaaacaacgttgtttattgaagctcgttttgtctgttgaaacaaatttaaaccctaaatcctcaaatcgatttcattatttatgattttgaggccaaggtgggtctgtgattttgagataatgatatcgatttggagatttaaggtttatatttgtttcaagagacaaaacgacgtcgttttgtctcttcaataaacaacgttgttttgttctaacagatcaaataaacaagacattaacaccgtaaaaaaattct…	ath-MIR5645b-p5	caaaacgacgtcgttttgtct	5'	New	gp2b	((((((((....)))))))).....	20	44	-7.4	0.7	4	0	0	4	0	0	4	18.5	5	0	0	0	0	9.5	14.5	11.5	5.34675	0	0	4.07207	0	0	2.49208	11.5072	5.15684	0
73	59	ath-MIR5645b-p3_2ss19TG22CA	CAAAACGACGTCGTTTTGGCTATT	24	ZDSB107F	+	1	25	tCAAAACGACGTCGTTTTGGCCATT	1	ath-MIR5645b,	ath-MIR5645b	cgacaaataaatcgtaaacgttttgttgacttttgaaataaatgacaaagtttttgttgacttgtcATTTGAGTCATGTCGTTAAGtaggttaacataaaaaatttaagacgttaatgtctcgtttatctcctccgtaaaaacaaaacaacgttgtttattgaagctcgttttgtctgttgaaacaaatttaaaccctaaatcctcaaatcgatttcattatttatgattttgaggccaaggtgggtctgtgattttgagataatgatatcgatttggagatttaaggtttatatttgtttcaagagacaaaacgacgtcgttttgtctcttcaataaacaacgttgttttgttctaacagatcaaataaacaagacattaacaccgtaaaaaaattct…	ath-MIR5645b-p3	caaaacgacgtcgttttgtctctt	3'	New	gp2b	((((((((....)))))))).....	20	44	-7.4	0.7	0	0	0	0	0	0	0	0	0	0	0	9	0	0	0	0	0	0	0	0	0	0	0	0	0	0
74	60	ath-MIR5645e-p3_2ss18TG20TG_2	AAAACGACGTCGTTTTGGGGC	21	ESTFullTBSD6_27	+	458	489	agcgcctcAAAACGACGTCGTTTTGGGGCaac	1	ath-MIR5645e,	ath-MIR5645e	taaatgacaaagtttatgttgacttttcATTTGAGTCATGTCGTTAAGtaggttaatataattatttcccggcgttaagttctcgtttatctcctctattagaacaaaacaacattgtttattgcatctcgttttgtctgttgaaacaaatttaaaccctaaatccccaaatcgatttcattatctgcgattttgaggtcaggtgggtttgtgattttgagataatgaaatcgatatagggatttaaggtttatatttgtttcaagagacaaaacgacgtcgttttgtgtcttcaataaacgacattgtttgttctaacagatcaaataaacaagtcattaaagccgtaaaaaaaattatattaacctatttaacgataggactcaaatggcaagtcaa…	ath-MIR5645e-p3	aaaacgacgtcgttttgtgtc	3'	New	gp2b	...(((((((((((....)))))))))))...	26	56.2	-17.9	1	19.5	8.5	14	20.5	33.5	9.5	9.5	37	23.5	18.5	0	0	6.5	43.5	7.5	28.5	26.0654	15.4501	22.7909	20.8694	25.0431	10.1841	5.9187	23.0143	24.2372	19.2374
75	60	ath-MIR5645e-p3_2ss18TG20TG_2	AAAACGACGTCGTTTTGGGGC	21	comp48269_c0	+	103	136	ttctgccccAAAACGACGTCGTTTTGGGGCatgg	1	ath-MIR5645e,	ath-MIR5645e	taaatgacaaagtttatgttgacttttcATTTGAGTCATGTCGTTAAGtaggttaatataattatttcccggcgttaagttctcgtttatctcctctattagaacaaaacaacattgtttattgcatctcgttttgtctgttgaaacaaatttaaaccctaaatccccaaatcgatttcattatctgcgattttgaggtcaggtgggtttgtgattttgagataatgaaatcgatatagggatttaaggtttatatttgtttcaagagacaaaacgacgtcgttttgtgtcttcaataaacgacattgtttgttctaacagatcaaataaacaagtcattaaagccgtaaaaaaaattatattaacctatttaacgataggactcaaatggcaagtcaa…	ath-MIR5645e-p3	aaaacgacgtcgttttgtgtc	3'	New	gp2b	...((((((((((((....))))))))))))...	28	55.9	-21.6	1.1	19.5	8.5	14	20.5	33.5	9.5	9.5	37	23.5	18.5	0	0	6.5	43.5	7.5	28.5	26.0654	15.4501	22.7909	20.8694	25.0431	10.1841	5.9187	23.0143	24.2372	19.2374
76	61	ath-MIR5645b-p3_2ss18TG20TA	AAAACGACGTCGTTTTGGCAC	21	comp1042270_c0	+	127	158	tgagtatcAAAACGACGTCGTTTTGACACatt	1	ath-MIR5645b,	ath-MIR5645b	cgacaaataaatcgtaaacgttttgttgacttttgaaataaatgacaaagtttttgttgacttgtcATTTGAGTCATGTCGTTAAGtaggttaacataaaaaatttaagacgttaatgtctcgtttatctcctccgtaaaaacaaaacaacgttgtttattgaagctcgttttgtctgttgaaacaaatttaaaccctaaatcctcaaatcgatttcattatttatgattttgaggccaaggtgggtctgtgattttgagataatgatatcgatttggagatttaaggtttatatttgtttcaagagacaaaacgacgtcgttttgtctcttcaataaacaacgttgttttgttctaacagatcaaataaacaagacattaacaccgtaaaaaaattct…	ath-MIR5645b-p3	aaaacgacgtcgttttgtctc	3'	New	gp2b	...((.((((((((....)))))))).))...	26	37.5	-10.5	0.9	0	0	0	0	0	0	0	0	0	0	0	0	0	16	0	0	0	0	0	0	0	0	0	0	0	0
77	62	ath-MIR5645b-p3_2ss19TG21TC	CAAAACGACGTCGTTTTGGCC	21	comp14330_c0	-	62	88	gtactCAAAACGACGTCGTTTTAGCCa	1	ath-MIR5645b,	ath-MIR5645b	cgacaaataaatcgtaaacgttttgttgacttttgaaataaatgacaaagtttttgttgacttgtcATTTGAGTCATGTCGTTAAGtaggttaacataaaaaatttaagacgttaatgtctcgtttatctcctccgtaaaaacaaaacaacgttgtttattgaagctcgttttgtctgttgaaacaaatttaaaccctaaatcctcaaatcgatttcattatttatgattttgaggccaaggtgggtctgtgattttgagataatgatatcgatttggagatttaaggtttatatttgtttcaagagacaaaacgacgtcgttttgtctcttcaataaacaacgttgttttgttctaacagatcaaataaacaagacattaacaccgtaaaaaaattct…	ath-MIR5645b-p3	caaaacgacgtcgttttgtct	3'	New	gp2b	...((.((((((....))))))))...	21	44.4	-4.5	0.4	4	0	0	4	0	0	4	18.5	5	0	0	0	0	9.5	14.5	11.5	5.34675	0	0	4.07207	0	0	2.49208	11.5072	5.15684	0
78	63	ath-MIR5645b-p3_2ss18TA20TC	AAAACGACGTCGTTTTGACCC	21	comp262684_c0	+	207	231	atccAAAACGACGTCGTTTTGACCC	1	ath-MIR5645b,	ath-MIR5645b	cgacaaataaatcgtaaacgttttgttgacttttgaaataaatgacaaagtttttgttgacttgtcATTTGAGTCATGTCGTTAAGtaggttaacataaaaaatttaagacgttaatgtctcgtttatctcctccgtaaaaacaaaacaacgttgtttattgaagctcgttttgtctgttgaaacaaatttaaaccctaaatcctcaaatcgatttcattatttatgattttgaggccaaggtgggtctgtgattttgagataatgatatcgatttggagatttaaggtttatatttgtttcaagagacaaaacgacgtcgttttgtctcttcaataaacaacgttgttttgttctaacagatcaaataaacaagacattaacaccgtaaaaaaattct…	ath-MIR5645b-p3	aaaacgacgtcgttttgtctc	3'	New	gp2b	...(((((((....)))))))....	18	48	-7.4	0.6	0	0	0	4.5	0	0	0	6	0	0	0	5	0	0	0	4.5	0	0	0	4.58108	0	0	0	3.73205	0	0
79	63	ath-MIR5645b-p3_2ss18TA20TC	AAAACGACGTCGTTTTGACCC	21	comp61950_c0	+	857	890	aacagggtcAAAACGACGTCGTTTTGACCCtcga	1	ath-MIR5645b,	ath-MIR5645b	cgacaaataaatcgtaaacgttttgttgacttttgaaataaatgacaaagtttttgttgacttgtcATTTGAGTCATGTCGTTAAGtaggttaacataaaaaatttaagacgttaatgtctcgtttatctcctccgtaaaaacaaaacaacgttgtttattgaagctcgttttgtctgttgaaacaaatttaaaccctaaatcctcaaatcgatttcattatttatgattttgaggccaaggtgggtctgtgattttgagataatgatatcgatttggagatttaaggtttatatttgtttcaagagacaaaacgacgtcgttttgtctcttcaataaacaacgttgttttgttctaacagatcaaataaacaagacattaacaccgtaaaaaaattct…	ath-MIR5645b-p3	aaaacgacgtcgttttgtctc	3'	New	gp2b	...((((((((((((....))))))))))))...	28	50	-19.3	1.1	0	0	0	4.5	0	0	0	6	0	0	0	5	0	0	0	4.5	0	0	0	4.58108	0	0	0	3.73205	0	0
80	64	ath-MIR5645b-p5_2ss18TG20TA	AAAACGACGTCGTTTTGGCAC	21	comp27906_c0	+	21	110	aaatcaAAAACGACGTCGTTTTGGCTCgaataggcaaaacgacgtcgttttgcaaaattcgagccaaagtcgagccgggtttttcgagct	1	ath-MIR5645b,	ath-MIR5645b	cgacaaataaatcgtaaacgttttgttgacttttgaaataaatgacaaagtttttgttgacttgtcATTTGAGTCATGTCGTTAAGtaggttaacataaaaaatttaagacgttaatgtctcgtttatctcctccgtaaaaacaaaacaacgttgtttattgaagctcgttttgtctgttgaaacaaatttaaaccctaaatcctcaaatcgatttcattatttatgattttgaggccaaggtgggtctgtgattttgagataatgatatcgatttggagatttaaggtttatatttgtttcaagagacaaaacgacgtcgttttgtctcttcaataaacaacgttgttttgttctaacagatcaaataaacaagacattaacaccgtaaaaaaattct…	ath-MIR5645b-p5	aaaacgacgtcgttttgtctc	5'	New	gp2b	...((((((((..((((((((((((((((((..((((((((....))))))))...))))))))))))).)))..)).)))))).))...	84	45.6	-38.5	0.9	0	0	0	0	0	0	0	0	0	0	0	0	0	16	0	0	0	0	0	0	0	0	0	0	0	0
81	65	ath-MIR5645e-p3_2ss18TG20TG_1	AAAACGACGTCGTTTTGGGG	20	comp40590_c0	+	37	82	gtttggctctaccccAAAACGACGTCGTTTTGGGGtcgagccacgg	2	ath-MIR5645b,ath-MIR5645e,	ath-MIR5645e	taaatgacaaagtttatgttgacttttcATTTGAGTCATGTCGTTAAGtaggttaatataattatttcccggcgttaagttctcgtttatctcctctattagaacaaaacaacattgtttattgcatctcgttttgtctgttgaaacaaatttaaaccctaaatccccaaatcgatttcattatctgcgattttgaggtcaggtgggtttgtgattttgagataatgaaatcgatatagggatttaaggtttatatttgtttcaagagacaaaacgacgtcgttttgtgtcttcaataaacgacattgtttgttctaacagatcaaataaacaagtcattaaagccgtaaaaaaaattatattaacctatttaacgataggactcaaatggcaagtcaa…	ath-MIR5645e-p3	aaaacgacgtcgttttgtgt	3'	New	gp2b	...((((((.(((((((((((....))))))))))).))))))...	40	58.7	-30.4	1.1	19.5	8.5	14	20.5	33.5	9.5	9.5	37	23.5	18.5	0	0	6.5	43.5	7.5	28.5	26.0654	15.4501	22.7909	20.8694	25.0431	10.1841	5.9187	23.0143	24.2372	19.2374
82	66	ath-MIR5645e-p5_2ss18TG20TG	AAAACGACGTCGTTTTGGGG	20	comp62080_c0	+	129	282	caaaaacaataatgcttagtagcccaaaaattcatgacttgaatgactcgaatgtgttAAAACGACGTCGTTTTGGGGataaaataacgtctttttaatatattcaagtcatttgggccatacaaatttaggccaccaagcatttttctttaaa	1	ath-MIR5645e,	ath-MIR5645e	taaatgacaaagtttatgttgacttttcATTTGAGTCATGTCGTTAAGtaggttaatataattatttcccggcgttaagttctcgtttatctcctctattagaacaaaacaacattgtttattgcatctcgttttgtctgttgaaacaaatttaaaccctaaatccccaaatcgatttcattatctgcgattttgaggtcaggtgggtttgtgattttgagataatgaaatcgatatagggatttaaggtttatatttgtttcaagagacaaaacgacgtcgttttgtgtcttcaataaacgacattgtttgttctaacagatcaaataaacaagtcattaaagccgtaaaaaaaattatattaacctatttaacgataggactcaaatggcaagtcaa…	ath-MIR5645e-p5	aaaacgacgtcgttttgtgt	5'	New	gp2b	...(((.((.(((((((.((.(((.(((.....(((.((..(((((((.(((((((((((((.(((((..(((((....)))))..))))).))))))))))))).)))))))..)).))).....))).))).)).))))))).)).)))...	148	32.5	-52.8	1.1	19.5	8.5	14	20.5	33.5	9.5	9.5	37	23.5	18.5	0	0	6.5	43.5	7.5	28.5	26.0654	15.4501	22.7909	20.8694	25.0431	10.1841	5.9187	23.0143	24.2372	19.2374
83	67	mdm-miR7122a_2ss4TA21CG	TTAAACAGAGAAATCACGGTGG	22	comp62375_c0	-	196	313	aaggcggcaataacagttaaaaaatccataatctactcgattcaggtggcagtaacagttaaataactatactacctaaaatatatattttgTTAAACAGAGAAATCACGGTCGcata	2	mdm-MIR7122a,mdm-MIR7122b,	mdm-MIR7122a	gggttcattccattcttTTATACAGAGAAATCACGGTCGagatcaaaactcagaagtctgtcagattctctctctccgtcgtctcaaccgtgtttttctgtataaagagatgtactggatcc	mdm-miR7122a	TTATACAGAGAAATCACGGTCG	3'	Diff	gp2b	...(((((..((((((.........((..((((.....))))..)).((.((((..((((....)))).)))).)).............))))))....((....))...)))))...	112	32.2	-20.6	0.5	122	632	176	1088	217	1234	1635	1326	249	416	1357	290	158	2471	619	1688	163.076	1148.76	286.514	1107.6	162.219	1322.86	1018.64	824.784	256.811	432.581
84	68	ghr-MIR7499-p3_2ss10GC17CG	GGTTAATTCCGTTAACGAAC	20	FS954152	+	346	448	taaggattgacagactgagagctctttcttgattctatgggtggtggtgcatggccgttcttagttggtggagcgatttgtctGGTTAATTCCGTTAACGAAC	1	ghr-MIR7499,	ghr-MIR7499	aataaaaaacATATAATTTTCGGTTAATTCGGTTaaccaaccgaattaactgaaaaatatcggtttggttaag	ghr-MIR7499-p3	GGTTAATTCGGTTaaccaac	3'	New	gp2b	...((((((((((((..(..(((((..((.....(((.(..((((........))))..).)))..)).)))))..)..)))).))))))))...........	89	45.6	-29.7	0.6	0	0	0	0	0	0	0	5.5	0	0	0	0	0	0	0	5	0	0	0	0	0	0	0	3.42105	0	0
85	68	ghr-MIR7499-p3_2ss10GC17CG	GGTTAATTCCGTTAACGAAC	20	Tea222_2006-02-16_1/Tea222_B09_039_1	+	79	115	gagcgatttgtctGGTTAATTCCGTTAACGAACgaga	1	ghr-MIR7499,	ghr-MIR7499	aataaaaaacATATAATTTTCGGTTAATTCGGTTaaccaaccgaattaactgaaaaatatcggtttggttaag	ghr-MIR7499-p3	GGTTAATTCGGTTaaccaac	3'	New	gp2b	...((.(((((.(((......)))...)))))))...	31	43.2	-4.6	0.3	0	0	0	0	0	0	0	5.5	0	0	0	0	0	0	0	5	0	0	0	0	0	0	0	3.42105	0	0
1	1	ptc-miR156a_R+2	TGACAGAAGAGAGTGAGCACCA	22						89	ptc-MIR156f,ama-MIR156,har-MIR156a,han-MIR156b,han-MIR156a,htu-MIR156a,vun-MIR156a,rco-MIR156b,rco-MIR156c,ghr-MIR156d,ghr-MIR156a,cpa-MIR156d,cpa-MIR156a,cpa-MIR156b,tcc-MIR156g,tcc-MIR156c,tcc-MIR156d,tcc-MIR156b,bna-MIR156a,bna-MIR156d,bna-MIR156f,bna-MIR156e,bra-MIR156e,bra-MIR156c,ath-MIR156c,bra-MIR156g,bra-MIR156f,bra-MIR156a,lus-MIR156a,lus-MIR156g,mes-MIR156b,mes-MIR156f,mes-MIR156e,mes-…	ptc-MIR156b	gtaagggaggTGACAGAAGAGAGTGAGCACacagggtactttcttgcatgacatccatgcttgaaactttgcgtgctcactctctatctgtcaccccacca	ptc-miR156a	TGACAGAAGAGAGTGAGCAC	5'	Diff	gp3	.....(((.(((((((((((((((((((((((((....((.(((.(((((....))))).)))))...)))))))))))).))))))))))))))))....	92	43.6	-54.1	1.2	0	0	9	108	0	61	97	18	0	0	8	288	0	0	8	20	0	0	14.6513	109.946	0	65.3927	60.433	11.1962	0	0
1	2	stu-miR156f-3p_L+2R-1_4ss14TC15T-22AG23TC	TGCTCACTTCTCTCCTGTCAGC	22						89	ptc-MIR156f,ama-MIR156,har-MIR156a,han-MIR156b,han-MIR156a,htu-MIR156a,vun-MIR156a,rco-MIR156b,rco-MIR156c,ghr-MIR156d,ghr-MIR156a,cpa-MIR156d,cpa-MIR156a,cpa-MIR156b,tcc-MIR156g,tcc-MIR156c,tcc-MIR156d,tcc-MIR156b,bna-MIR156a,bna-MIR156d,bna-MIR156f,bna-MIR156e,bra-MIR156e,bra-MIR156c,ath-MIR156c,bra-MIR156g,bra-MIR156f,bra-MIR156a,lus-MIR156a,lus-MIR156g,mes-MIR156b,mes-MIR156f,mes-MIR156e,mes-…	stu-MIR156f	CTGACAGAAGAGAGTGAGCAtacacatataattatataaatatttttacttaattttcttgatatatattgtatatataattttgcgagtgCTCACTTCTCTTTCTGTCAATC	stu-miR156f-3p	CTCACTTCTCTTTCTGTCAATC	3'	Diff	gp3	.....(((.(((((((((((((((((((((((((....((.(((.(((((....))))).)))))...)))))))))))).))))))))))))))))....	92	43.6	-54.1	1.2	16	134	680	1411	103	228	1238	6030	83	82	3836	70	49	1672	1996	3781	21.387	243.566	1106.98	1436.42	76.9981	244.419	771.3	3750.71	85.6036	85.2684
2	3	gma-miR159a-3p_L+3	ATCTTTGGATTGAAGGGAGCTCTA	24						2	gma-MIR159a,gma-MIR159e,	gma-MIR159e	caaagggggttatggagtgGAGCTCCTTGAAGTCCAATTGaggatcttactgggtggattgagctgcttagctatggatcccacagttctacccatcattaagtgcttttgtggtagtcttgtggcttccatatctggggagcttcatttgcctttatagtattatccttcTTTGGATTGAAGGGAGCTCTAcacccttctccccttttgt	gma-miR159a-3p	TTTGGATTGAAGGGAGCTCTA	3'	Diff	gp3	....((((..((.......((((((((((((..(((((((..((((....(((((((..(((..((((.(..(..((((((..((((((..(((((((..............)).)))))..))))))..))))))..)..).))))..)))..)))....))))....))))..)))))))..)))))))))))).......))..))))...	177	41.6	-87.2	1	0	8	0	11	8	12	10	30	8	8	8	0	0	31	0	12	0	14.5412	0	11.1982	5.98044	12.8641	6.23021	18.6603	8.25095	8.31887
3	4	vvi-miR160c_L+1R-1	ATGCCTGGCTCCCTGTATGCC	21						81	vvi-MIR160e,htu-MIR160a,vun-MIR160,ahy-MIR160,aqc-MIR160b,cca-MIR160b,csi-MIR160,rco-MIR160b,rco-MIR160a,rco-MIR160c,sly-MIR160a,cpa-MIR160a,cpa-MIR160c,cpa-MIR160f,cpa-MIR160b,cpa-MIR160e,tcc-MIR160b,tcc-MIR160a,tcc-MIR160c,bna-MIR160b,bna-MIR160d,bna-MIR160a,bna-MIR160c,bra-MIR160a,lus-MIR160b,lus-MIR160h,lus-MIR160j,lus-MIR160f,lus-MIR160i,lus-MIR160d,lus-MIR160a,lus-MIR160e,lus-MIR160c,lus-MI…	vvi-MIR160c	aaatgggttgTGCCTGGCTCCCTGTATGCCAcacgtagagaccactccctttcccggattggctatttgcgggtggcgtgcgaggagccaagcatacccaccattc	vvi-miR160c	TGCCTGGCTCCCTGTATGCCA	5'	Diff	gp3	...(((..(((((.(((((((..((((((((((..(..((.(((.(((....))).))).))..)..))))))))))..))))))).)))))))).......	92	54.9	-51.1	0.9	90.5	16	26	193	280.5	57.5	269	282.5	339.5	54	307.5	15	35	480	127	149	120.97	29.0825	42.3259	196.478	209.689	61.6407	167.593	175.718	350.15	56.1524
3	5	cpa-miR160c-3p	GCGTATGAGGAGCCATGCATA	21						81	vvi-MIR160e,htu-MIR160a,vun-MIR160,ahy-MIR160,aqc-MIR160b,cca-MIR160b,csi-MIR160,rco-MIR160b,rco-MIR160a,rco-MIR160c,sly-MIR160a,cpa-MIR160a,cpa-MIR160c,cpa-MIR160f,cpa-MIR160b,cpa-MIR160e,tcc-MIR160b,tcc-MIR160a,tcc-MIR160c,bna-MIR160b,bna-MIR160d,bna-MIR160a,bna-MIR160c,bra-MIR160a,lus-MIR160b,lus-MIR160h,lus-MIR160j,lus-MIR160f,lus-MIR160i,lus-MIR160d,lus-MIR160a,lus-MIR160e,lus-MIR160c,lus-MI…	cpa-MIR160c	TGCCTGGCTCCCTGTATGCCAtttgcagagcccaccgagcatcgctggcctccgtggatgGCGTATGAGGAGCCATGCATA	cpa-miR160c-3p	GCGTATGAGGAGCCATGCATA	3'	Yes	gp3	...(((..(((((.(((((((..((((((((((..(..((.(((.(((....))).))).))..)..))))))))))..))))))).)))))))).......	92	54.9	-51.1	0.9	44	19	32	169	125	10	432.5	228.5	100.5	74.5	582	11	89.5	87.5	406.5	197	58.8143	34.5354	52.0934	172.045	93.4443	10.7201	269.457	142.129	103.653	77.4695
4	6	csi-miR162-5p_L-1_1ss5GC	GGACGCAGCGGTTCATCGATC	21						32	tcc-MIR162,hpe-MIR162a,aau-MIR162,htu-MIR162a,vun-MIR162,csi-MIR162,rco-MIR162,sly-MIR162,ghr-MIR162a,cpa-MIR162a,bra-MIR162,lus-MIR162a,lus-MIR162b,mes-MIR162,nta-MIR162a,nta-MIR162b,vvi-MIR162,ppe-MIR162,aly-MIR162a,aly-MIR162b,mdm-MIR162b,mdm-MIR162a,stu-MIR162a,stu-MIR162b,ath-MIR162a,ath-MIR162b,ptc-MIR162a,ptc-MIR162b,gma-MIR162a,gma-MIR162c,gma-MIR162b,mtr-MIR162,	csi-MIR162	aaactgtttacactgatctgtgctgctgataaatcttaatttttttttttgaatttttatttaacagaaaatagagagagtgaagtcacTGGAGGCAGCGGTTCATCGATCactttgtgcaaattttgttgtgaaaaataacacaaaatacatgaatcgaTCGATAAACCTCTGCATCCAGcgctcactccaactctattc	csi-miR162-5p	TGGAGGCAGCGGTTCATCGATC	5'	Diff	gp3	((((....((((..(((...(((((.((((.((((.(((((((...((.((.......((((((....))))))......)).))...))))))).)))).)))).)))))...)))))))...))))...	128	42	-40.2	0.7	21	38	16	43	109	90	92	226	41	62	91	11	88	167	42	71	28.0704	69.0709	26.0467	43.7748	81.4834	96.481	57.3179	140.574	42.2861	64.4712
4	7	tcc-miR162	TCGATAAACCTCTGCATCCAG	21						32	tcc-MIR162,hpe-MIR162a,aau-MIR162,htu-MIR162a,vun-MIR162,csi-MIR162,rco-MIR162,sly-MIR162,ghr-MIR162a,cpa-MIR162a,bra-MIR162,lus-MIR162a,lus-MIR162b,mes-MIR162,nta-MIR162a,nta-MIR162b,vvi-MIR162,ppe-MIR162,aly-MIR162a,aly-MIR162b,mdm-MIR162b,mdm-MIR162a,stu-MIR162a,stu-MIR162b,ath-MIR162a,ath-MIR162b,ptc-MIR162a,ptc-MIR162b,gma-MIR162a,gma-MIR162c,gma-MIR162b,mtr-MIR162,	tcc-MIR162	aggaaaaagggttaaagacactggaggcagcggttcatcgatctcttcctgggaattttgttgtgagaataacacaaatacatgattcgaTCGATAAACCTCTGCATCCAGagccttacctctctctttaa	tcc-miR162	TCGATAAACCTCTGCATCCAG	3'	Yes	gp3	((((....((((..(((...(((((.((((.((((.(((((((...((.((.......((((((....))))))......)).))...))))))).)))).)))).)))))...)))))))...))))...	128	42	-40.2	0.7	783	951	451	1407	2731	2028	1296	2330	1580	1927	1836	543	3390	3283	872	1762	1046.63	1728.59	734.191	1432.35	2041.57	2174.04	807.435	1449.28	1629.56	2003.81
5	8	cpa-miR164a	TGGAGAAGCAGGGCACGTGCA	21						71	cpa-MIR164b,ctr-MIR164,ssl-MIR164b,ssl-MIR164a,csi-MIR164,rco-MIR164c,rco-MIR164a,rco-MIR164b,sly-MIR164a,sly-MIR164b,ghr-MIR164,cpa-MIR164c,cpa-MIR164a,tcc-MIR164b,tcc-MIR164a,bna-MIR164a,bna-MIR164d,bra-MIR164d,bna-MIR164c,bra-MIR164c,bna-MIR164b,bra-MIR164e,bra-MIR164a,bra-MIR164b,lus-MIR164a,lus-MIR164b,lus-MIR164e,lus-MIR164d,lus-MIR164c,mes-MIR164a,mes-MIR164b,mes-MIR164c,nta-MIR164a,nta-MI…	cpa-MIR164a	TGGAGAAGCAGGGCACGTGCAaaggctagatattgacacctgcattgcacgtgctccccttctccaac	cpa-miR164a	TGGAGAAGCAGGGCACGTGCA	5'	Yes	gp3	(((.((((..(((((((((....((((((((((.............................))))))))))....)))))))))..)))).)))..	95	46.4	-36.5	0.8	1612	341	8	0	1646	2788	34	45	3959	3201	34	30	6066	2240	19	0	2154.74	619.82	13.0233	0	1230.47	2988.77	21.1827	27.9904	4083.19	3328.59
5	9	sly-miR164a-3p_2ss9TC12TC	CATGTGCCCGTCTTCCCCATC	21						71	cpa-MIR164b,ctr-MIR164,ssl-MIR164b,ssl-MIR164a,csi-MIR164,rco-MIR164c,rco-MIR164a,rco-MIR164b,sly-MIR164a,sly-MIR164b,ghr-MIR164,cpa-MIR164c,cpa-MIR164a,tcc-MIR164b,tcc-MIR164a,bna-MIR164a,bna-MIR164d,bra-MIR164d,bna-MIR164c,bra-MIR164c,bna-MIR164b,bra-MIR164e,bra-MIR164a,bra-MIR164b,lus-MIR164a,lus-MIR164b,lus-MIR164e,lus-MIR164d,lus-MIR164c,mes-MIR164a,mes-MIR164b,mes-MIR164c,nta-MIR164a,nta-MI…	sly-MIR164a	tcgagaTGGAGAAGCAGGGCACGTGCAttactaactcatacgcaagatttatcgatgtttcgaaaattctgctatcatagtactgtattttacagcaaatagtgtttgtactttacatgtatgtgataaaatgatgagttagttattCATGTGCCTGTTTTCCCCATCatga	sly-miR164a-3p	CATGTGCCTGTTTTCCCCATC	3'	Diff	gp3	(((.((((..(((((((((....((((((((((.............................))))))))))....)))))))))..)))).)))..	95	46.4	-36.5	0.8	307	74	0	0	332	834	0	9	1141	329	8	0	1050	430	0	0	410.363	134.506	0	0	248.188	894.058	0	5.59808	1176.79	342.114
6	10	cpa-miR164d	TGGAGAAGGGGAGCACGTGCA	21						3	cpa-MIR164d,vun-MIR164,cpa-MIR164e,	cpa-MIR164e	TGGAGAAGGGGAGCACGTGCAaagaggggaaagccatggagaatttgcacgtgccctgcttctccaac	cpa-miR164d	TGGAGAAGGGGAGCACGTGCA	5'	Yes	gp3	(((((((((((.((((((((((.(((((((....))))).))..))))))))))))).))))))))..	66	54.4	-39.3	1.1	0	0	0	0	0	0	0	0	14	0	0	0	0	0	0	0	0	0	0	0	0	0	0	0	14.4392	0
7	11	csi-miR166e-5p_L-1R+1_1ss21GA	GAATGTTGTCTGGCTCGAGAT	21						161	mdm-MIR166c,hpe-MIR166a,crt-MIR166a,crt-MIR166b,ctr-MIR166,pvu-MIR166a,dpr-MIR166b,dpr-MIR166a,ssl-MIR166a,ssl-MIR166b,hbr-MIR166b,hbr-MIR166a,aqc-MIR166e,aqc-MIR166b,aqc-MIR166c,aqc-MIR166a,aqc-MIR166d,csi-MIR166c,csi-MIR166a,csi-MIR166e,csi-MIR166b,csi-MIR166d,rco-MIR166c,rco-MIR166b,rco-MIR166e,rco-MIR166d,rco-MIR166a,sly-MIR166a,sly-MIR166b,sly-MIR166c,ghr-MIR166b,cpa-MIR166c,cpa-MIR166a,cpa-…	csi-MIR166e	ggggagctttttgttttgaggGGAATGTTGTCTGGCTCGAGGacactacttgttgatccattaattttacgtattctctcatagatctagcatctgaatggtggataacaatatacggattcagcttatttggcgtcgTCGGACCAGGCTTCATTCCCCCcaatatattgcttctat	csi-miR166e-5p	GGAATGTTGTCTGGCTCGAGG	5'	Diff	gp3	(((((.((((((((..(((((((((((((((.((((........((.....))........)))).)))))))))))))))..)))))))).)))))	97	42.3	-50.7	1.2	17.5	28	0	0	19	88	0	7.5	35	70	5	0	14.5	87.5	0	4.5	23.392	50.8943	0	0	14.2035	94.337	0	4.66507	36.0979	72.7901
8	12	lja-miR167_R+1_1ss21GT	TGAAGCTGCCAGCATGATCTTT	22						81	lja-MIR167,ccl-MIR167b,ccl-MIR167a,ctr-MIR167,gso-MIR167a,dpr-MIR167c,dpr-MIR167b,ahy-MIR167,csi-MIR167a,csi-MIR167b,lja-MIR167c,lja-MIR167a,lja-MIR167b,rco-MIR167a,ghr-MIR167a,cpa-MIR167d,cpa-MIR167c,cpa-MIR167a,cpa-MIR167b,tcc-MIR167b,tcc-MIR167c,bna-MIR167d,bna-MIR167a,bra-MIR167b,bra-MIR167c,bna-MIR167c,bra-MIR167a,bna-MIR167b,bra-MIR167d,lus-MIR167i,lus-MIR167h,lus-MIR167d,lus-MIR167b,lus-MI…	lja-MIR167	gttcgtgcacctgcaatagtTGAAGCTGCCAGCATGATCTGagcttaccttcttgtaataatggtaagaacagatcatatggcagcttcacctgttgaatggaagcat	lja-miR167	TGAAGCTGCCAGCATGATCTG	5'	Diff	gp3	....((((.((..((((((.(((((((((((..((((((((..((((((.............))))))..)))))))).))))))))))).))))))...))..))))	104	43.5	-53.6	1.1	3.33333	3.66667	37	23.6667	2.66667	15	52	23.3333	6	0	14.3333	9	0	28	0	4	4.45563	6.66474	60.233	24.0931	1.99348	16.0802	32.3971	14.5135	6.18821	0
8	13	ahy-miR167-3p_2ss8GA15TC	AGATCATATGGCAGCTTCACC	21						81	lja-MIR167,ccl-MIR167b,ccl-MIR167a,ctr-MIR167,gso-MIR167a,dpr-MIR167c,dpr-MIR167b,ahy-MIR167,csi-MIR167a,csi-MIR167b,lja-MIR167c,lja-MIR167a,lja-MIR167b,rco-MIR167a,ghr-MIR167a,cpa-MIR167d,cpa-MIR167c,cpa-MIR167a,cpa-MIR167b,tcc-MIR167b,tcc-MIR167c,bna-MIR167d,bna-MIR167a,bra-MIR167b,bra-MIR167c,bna-MIR167c,bra-MIR167a,bna-MIR167b,bra-MIR167d,lus-MIR167i,lus-MIR167h,lus-MIR167d,lus-MIR167b,lus-MI…	ahy-MIR167	gatcatgcaccactacaagtTGAAGCTGCCAGCATGATCTTaactttccctctcctatgatttgttggggtgagatcAGATCATGTGGCAGTTTCACCtagttgttggaagcatgaat	ahy-miR167-3p	AGATCATGTGGCAGTTTCACC	3'	Diff	gp3	....((((.((..((((((.(((((((((((..((((((((..((((((.............))))))..)))))))).))))))))))).))))))...))..))))	104	43.5	-53.6	1.1	0	0	9	13	0	62	52	38	0	13	54	11	18	73	9	133	0	0	14.6513	13.2342	0	66.4647	32.3971	23.6363	0	13.5182
9	14	mdm-miR167h_1ss22AT	TGAAGCTGCCAGCATGATCTTT	22						9	mdm-MIR167a,mdm-MIR167h,mdm-MIR167i,ahy-MIR167,aly-MIR167a,mdm-MIR167j,ath-MIR167a,ptc-MIR167g,ptc-MIR167f,	mdm-MIR167j	agtgtgcatatgttcttatcatgcactggtagcagtTGAAGCTGCCAGCATGATCTTAtaactccctacttcgtttagggaagctcAGATCATCTGGCAGTTTCACCtgttgttggtagcatgagaccatcaaaaccct	mdm-miR167h	TGAAGCTGCCAGCATGATCTTA	5'	Diff	gp3	((((((((..(((((((.((((((((((((.(((((((.((...((((...........))))..)).))))))))))))))))))).)))))))..)).))))))	106	46.2	-56.9	1.2	3.33333	3.66667	37	23.6667	2.66667	15	52	23.3333	6	0	14.3333	9	0	28	0	4	4.45563	6.66474	60.233	24.0931	1.99348	16.0802	32.3971	14.5135	6.18821	0
10	15	gra-miR167a_L-2R+2	AGATCATCTTGCAGCTTCAAT	21						2	gra-MIR167a,gra-MIR167b,	gra-MIR167b	tttgagaggttgaagctgccagcatgatctggtaatgggcctagctatcaccctttttttatttttgtattcttaggcctcttttatagtttttgtacaggtatgttaagttagattgtttatgaccggttttagatcaaaattcttttgagtccaagatgagtttttttctttctttctttcaggagaagtttatcaatcatttggttaagggcttttagagtcttagattaccaggcaacttagatgtgtttataaagaaccctgcctgtacttaagcttcataggttgtcggttcatactaTCAGATCATCTTGCAGCTTCAatcactcact	gra-miR167a	TCAGATCATCTTGCAGCTTCA	3'	Diff	gp3	..((((.((((((((((((.((.(((((((((((...((((((.((((.........(((..(((...(((((..(((((((......((((........)))).)))))))....))))).........)))..)))......(((((((.(((((.....)))))....))))))).)))).)).))))....))))))))))))).)))))))))))).))))..	224	36.4	-66.2	0.8	0	0	0	52	11	31	174	88	23	15	275	25	0	68	118	165	0	0	0	52.9369	8.2231	33.2324	108.406	54.7368	23.7215	15.5979
11	16	bna-miR168a	TCGCTTGGTGCAGGTCGGGAA	21						34	bna-MIR168a,bra-MIR168a,crt-MIR168,ccl-MIR168,vun-MIR168,cca-MIR168a,rco-MIR168,sly-MIR168a,sly-MIR168b,tcc-MIR168,bra-MIR168b,bra-MIR168c,lus-MIR168a,lus-MIR168b,mes-MIR168a,nta-MIR168d,nta-MIR168e,nta-MIR168a,nta-MIR168b,nta-MIR168c,vvi-MIR168,ppe-MIR168,aly-MIR168a,aly-MIR168b,mdm-MIR168a,mdm-MIR168b,ath-MIR168a,ath-MIR168b,ptc-MIR168b,ptc-MIR168a,gma-MIR168b,gma-MIR168a,mtr-MIR168c,mtr-MIR168…	bna-MIR168a	ttacggcggcctctgacTCGCTTGGTGCAGGTCGGGAActgattggctgacaccgccacgtggctttccatggttggcttgtgagcagggatcggatcccgccttgtatcaagtgaatccgagtccgacgtga	bna-miR168a	TCGCTTGGTGCAGGTCGGGAA	5'	Yes	gp3	(((((.(((.(((.((.((((((((((((((.(((((.((((((.(((.(((..(((((((((....)))))..)))).))).)))...)))))).))))).)))))))))))))).)).))).))).)))))	133	58.6	-69.3	0.9	1033	1202	1769	3552	3585	1363	5349	18616	4999	3098	9548	504	2500	18159	4264	10255	1380.8	2184.82	2879.79	3616	2679.98	1461.15	3332.54	11579.3	5155.81	3221.48
12	17	aly-miR170-5p_1ss8CA	TATTGGCATGGTTCACTCAGA	21						66	aly-MIR171a,crt-MIR171,ccl-MIR171,htu-MIR171a,htu-MIR171b,htu-MIR171c,aqc-MIR171f,lja-MIR171a,rco-MIR171f,rco-MIR171e,rco-MIR171c,sly-MIR171a,cpa-MIR171a,tcc-MIR171a,tcc-MIR171h,tcc-MIR171g,tcc-MIR171f,tcc-MIR171d,tcc-MIR171e,bna-MIR171f,bra-MIR171e,bna-MIR171g,lus-MIR171e,lus-MIR171b,lus-MIR171c,mes-MIR171j,mes-MIR171i,mes-MIR171k,mes-MIR171g,mes-MIR171h,nta-MIR171c,nta-MIR171a,vvi-MIR171e,vvi-M…	aly-MIR170	cattctctctcttcgattcttgtttctcttgcaaaacagataccctctgtctctgagtccgagagagtccctctgaTATTGGCCTGGTTCACTCAGAttctcctaactaactcatcTGATTGAGCCGTGTCAATATCtcagtcctctctcgtcgcttctctcatactttagagattgttttgttttgtacacacgagttgtttgttgatatg	aly-miR170-5p	TATTGGCCTGGTTCACTCAGA	5'	Diff	gp3	(((...((((((..(((.........((((.......((.((((((((((..((..(((((((((..((((((.((((((..((..(((......)))....(((....)))..........))..)))))).))))))..)))))))))..)).))))))))))))......))))......)))..)))))).)))	130	40.9	-53.1	0.7	13	0	72	205	14	14	219	446	27	0	809	21	0	50	114	314	17.3769	0	117.21	208.694	10.4658	15.0082	136.442	277.416	27.847	0
13	18	aly-miR171c-5p_2ss1AG21CA	GGATATTGGTGCGGTTCAATA	21						33	csi-MIR171a,bol-MIR171a,bna-MIR171d,ssl-MIR171a,rco-MIR171b,rco-MIR171a,sly-MIR171c,sly-MIR171b,bna-MIR171c,bra-MIR171c,bna-MIR171e,bna-MIR171a,bra-MIR171b,bna-MIR171b,bra-MIR171d,bra-MIR171a,lus-MIR171i,mes-MIR171c,mes-MIR171b,aly-MIR171c,aly-MIR171b,mdm-MIR171f,stu-MIR171d,ath-MIR171c,ath-MIR171b,ptc-MIR171b,ptc-MIR171a,gma-MIR171f,gma-MIR171o,gma-MIR171i,gma-MIR171a,gma-MIR171c,gma-MIR171q,	aly-MIR171c	ggacatcgaatacgAGATATTGGTGCGGTTCAATCagaaaactgtactcttttgttttaaagatcggtttgtttgaTTGAGCCGTGCCAATATCACGtgtttaaatagttt	aly-miR171c-5p	AGATATTGGTGCGGTTCAATC	5'	Diff	gp3	....((((.(((((((((((((((((((.(((((.(((.((((((......)))))).))).))))).))))))))))))))))))).)))).....	88	46.4	-55.1	1.2	48	0	0	0	28	0	0	0	89	18	0	0	0	26	0	0	64.161	0	0	0	20.9315	0	0	0	91.7918	18.7175
13	19	bol-miR171a_1ss19AG	TTGAGCCGTGCCAATATCGCG	21						33	csi-MIR171a,bol-MIR171a,bna-MIR171d,ssl-MIR171a,rco-MIR171b,rco-MIR171a,sly-MIR171c,sly-MIR171b,bna-MIR171c,bra-MIR171c,bna-MIR171e,bna-MIR171a,bra-MIR171b,bna-MIR171b,bra-MIR171d,bra-MIR171a,lus-MIR171i,mes-MIR171c,mes-MIR171b,aly-MIR171c,aly-MIR171b,mdm-MIR171f,stu-MIR171d,ath-MIR171c,ath-MIR171b,ptc-MIR171b,ptc-MIR171a,gma-MIR171f,gma-MIR171o,gma-MIR171i,gma-MIR171a,gma-MIR171c,gma-MIR171q,	bol-MIR171a	acaatgcgagatattggtgcggttcaatcagaaatccacactcttttgttgtagagatcggtttgtttgaTTGAGCCGTGCCAATATCACGagtgt	bol-miR171a	TTGAGCCGTGCCAATATCACG	3'	Diff	gp3	....((((.(((((((((((((((((((.(((((.(((.((((((......)))))).))).))))).))))))))))))))))))).)))).....	88	46.4	-55.1	1.2	4	0	0	5.5	6.5	0	5	0	11	7	0	0	0	39.5	0	0	5.34675	0	0	5.5991	4.8591	0	3.1151	0	11.3451	7.27901
14	20	aly-miR171c-5p_1ss5AG	AGATGTTGGTGCGGTTCAATC	21						11	aly-MIR171c,lus-MIR171d,aly-MIR171b,stu-MIR171d,ath-MIR171c,ath-MIR171b,ptc-MIR171a,gma-MIR171o,gma-MIR171f,gma-MIR171q,gma-MIR171c,	aly-MIR171c	ggacatcgaatacgAGATATTGGTGCGGTTCAATCagaaaactgtactcttttgttttaaagatcggtttgtttgaTTGAGCCGTGCCAATATCACGtgtttaaatagttt	aly-miR171c-5p	AGATATTGGTGCGGTTCAATC	5'	Diff	gp3	.......(((((((.((((((((..(((((((((((((((((((...(((((......))))).)))))).)))))))))))))..)))))))).))))))).........	95	36.9	-50.8	1.2	0	0	0	0	0	0	0	0	0	0	0	0	11	32	0	0	0	0	0	0	0	0	0	0	0	0
14	21	aly-miR171b-3p_1ss19AG	TTGAGCCGTGCCAATATCGCG	21						11	aly-MIR171c,lus-MIR171d,aly-MIR171b,stu-MIR171d,ath-MIR171c,ath-MIR171b,ptc-MIR171a,gma-MIR171o,gma-MIR171f,gma-MIR171q,gma-MIR171c,	aly-MIR171b	gagtgattttatgtaaggtaacgcgAGATATTAGTGCGGTTCAATCaaatagtcgtcctcttaactcatggagatcggtgttgttcgaTTGAGCCGTGCCAATATCACGcggtaaaccaaaatggcaaagatcgatc	aly-miR171b-3p	TTGAGCCGTGCCAATATCACG	3'	Diff	gp3	.......(((((((.((((((((..(((((((((((((((((((...(((((......))))).)))))).)))))))))))))..)))))))).))))))).........	95	36.9	-50.8	1.2	4	0	0	5.5	6.5	0	5	0	11	7	0	0	0	39.5	0	0	5.34675	0	0	5.5991	4.8591	0	3.1151	0	11.3451	7.27901
15	22	gma-miR171m	TTGAGCCGCGTCAATATCTCA	21						4	gma-MIR171m,sly-MIR171e,stu-MIR171b,gma-MIR171t,	gma-MIR171t	gaagtgctgtatgaagcacaaatcaaggtattggcgcgcctcaatttgaagtcatggttaacatgaaacaagccatgtagttttaaTTGAGCCGCGTCAATATCTCAtcttgcactt	gma-miR171m	TTGAGCCGCGTCAATATCTCA	3'	Yes	gp3	((((........((((..(((....(((((((((((((.(((((((.....((((((((............))))))))......))))))).)))))))))))))....)))..)))).......))))...	107	39.1	-43.3	0.8	0	0	0	0	122	70	0	0	0	0	0	0	281	0	0	17	0	0	0	0	91.2016	75.0408	0	0	0	0
16	23	lja-miR171c	TGAGCCGAATCAATATCACTC	21						1	lja-MIR171c,	lja-MIR171c	gcaaaagcagacatggcgtgatgttgatctggctcatatttaagtataagtgtatcttatcaacttcagaTGAGCCGAATCAATATCACTCttgtcttcttttttgc	lja-miR171c	TGAGCCGAATCAATATCACTC	3'	Yes	gp3	(((((((.(((((.((.(((((((((((..(((((((....(((((((((.....)))))..))))...)))))))..))))))))))).)))))))...)))))))	107	37.4	-42.8	1.1	0	0	0	0	0	0	0	0	0	0	0	0	16	8	0	0	0	0	0	0	0	0	0	0	0	0
17	24	nta-miR172d	AGAATCTTGATGATGCTGCAT	21						203	nta-MIR172e,aau-MIR172,aau-MIR172,bol-MIR172b,bra-MIR172b,bol-MIR172b,bra-MIR172b,bol-MIR172a,bra-MIR172a,bol-MIR172a,bra-MIR172a,dpr-MIR172a,dpr-MIR172a,dpr-MIR172b,dpr-MIR172b,vun-MIR172,vun-MIR172,ssl-MIR172,ssl-MIR172,aqc-MIR172a,aqc-MIR172a,aqc-MIR172b,aqc-MIR172b,cca-MIR172,cca-MIR172,csi-MIR172a,csi-MIR172a,csi-MIR172c,csi-MIR172c,lja-MIR172b,lja-MIR172b,lja-MIR172c,lja-MIR172c,lja-MIR172a…	nta-MIR172e	gtttgcagatgtagcatcatcaagattcacataaaaaacgcatggtgatgagctgatgaaatgacattaatggccaaggcagctttctgaaggtgAGAATCTTGATGATGCTGCATcagcaataaacgactacctgatttatcattatgccattggaacgatacacagataattagcataattcatgtgcaagaatgccacgggtacatggtatggttcaattgatacagtcgttgtttgcgggtgtagcatcatcaagattcacatgaaaaggcaaggtgaaatgaaattaattaagagccatggctttttgaaggtgAGAATCTTGATGATGCTGCATcagcaataa	nta-miR172d	AGAATCTTGATGATGCTGCAT	5'	Yes	gp3	..((((.(((((((((((((((((((((.(((..((((.(((((((..(((..((((...((..(((.....(((....((.(((....))).)).(((((((((((((((((((((.((((..(((((((...(((....)))......((...((((.((((.((........(((((.....))))).....((((...))))..)))))).))))...))....)))))))..)))).))))))))))))))))))))).........)))...)))..))...)))).)))...)))))).).))))....))).))))))))))))))))))))).))))...	167	39	-129.4	1	62.3333	13.3333	4	11	107	66	11.6667	11.6667	141	106	16.6667	12.3333	169.833	33.3333	9	11.3333	83.3202	24.2354	6.51167	11.1982	79.9883	70.7528	7.26858	7.25677	145.423	110.225
17	25	ppe-miR172a-5p_1ss21GA	GTAGCATCATCAAGATTCACA	21						203	nta-MIR172e,aau-MIR172,aau-MIR172,bol-MIR172b,bra-MIR172b,bol-MIR172b,bra-MIR172b,bol-MIR172a,bra-MIR172a,bol-MIR172a,bra-MIR172a,dpr-MIR172a,dpr-MIR172a,dpr-MIR172b,dpr-MIR172b,vun-MIR172,vun-MIR172,ssl-MIR172,ssl-MIR172,aqc-MIR172a,aqc-MIR172a,aqc-MIR172b,aqc-MIR172b,cca-MIR172,cca-MIR172,csi-MIR172a,csi-MIR172a,csi-MIR172c,csi-MIR172c,lja-MIR172b,lja-MIR172b,lja-MIR172c,lja-MIR172c,lja-MIR172a…	ppe-MIR172a	agtcgttgtttgcgggcGTAGCATCATCAAGATTCACGcacatgcaattaacttgaaagtttctctctttgccaaagtttctttcaaagtgAGAATCTTGATGATGCTGCATcggcaataaaccact	ppe-miR172a-5p	GTAGCATCATCAAGATTCACG	3'	Diff	gp3	..((((.(((((((((((((((((((((.(((..((((.(((((((..(((..((((...((..(((.....(((....((.(((....))).)).(((((((((((((((((((((.((((..(((((((...(((....)))......((...((((.((((.((........(((((.....))))).....((((...))))..)))))).))))...))....)))))))..)))).))))))))))))))))))))).........)))...)))..))...)))).)))...)))))).).))))....))).))))))))))))))))))))).))))...	167	39	-129.4	1	8.5	11	0	0	24	5.5	0	0	14.5	25	4.5	4	21.5	4.5	0	0	11.3618	19.9942	0	0	17.9413	5.89606	0	0	14.9548	25.9965
18	26	ptc-miR172b-5p	GGAGCATCATCAAGATTCACA	21						19	ptc-MIR172b,ppe-MIR172a,aly-MIR172a,aly-MIR172c,aly-MIR172f,aly-MIR172b,stu-MIR172d,stu-MIR172b,stu-MIR172a,gra-MIR172b,ptc-MIR172g,ptc-MIR172h,gma-MIR172h,gma-MIR172b,gma-MIR172f,gma-MIR172j,gma-MIR172a,mtr-MIR172c,mtr-MIR172d,	ptc-MIR172g	ctgtttgcctatGGAGCATCATCAAGATTCACAagctttattagggctagtgtgtggtgatgatggtggcttttggtggtccctttttttcaatccaatagccctttgaattgGGAATCTTGATGATGCTGCAGcggcaataa	ptc-miR172b-5p	GGAGCATCATCAAGATTCACA	5'	Yes	gp3	....((((.((((.((((((((((((((((.(((((....))..(((.(((((.....(((..((((......))))..)))..))))).)))..............))).)))))))))))))))).)))).))))...	133	41.4	-54.6	0.9	49.5	8	0	0	72	5.5	0	0	82.5	37	4.5	4	60	4.5	0	0	66.166	14.5412	0	0	53.8239	5.89606	0	0	85.0879	38.4748
18	27	ptc-miR172a	AGAATCTTGATGATGCTGCAT	21						19	ptc-MIR172b,ppe-MIR172a,aly-MIR172a,aly-MIR172c,aly-MIR172f,aly-MIR172b,stu-MIR172d,stu-MIR172b,stu-MIR172a,gra-MIR172b,ptc-MIR172g,ptc-MIR172h,gma-MIR172h,gma-MIR172b,gma-MIR172f,gma-MIR172j,gma-MIR172a,mtr-MIR172c,mtr-MIR172d,	ptc-MIR172b	ttgtttgcgggtGGAGCATCATCAAGATTCACAtgcaaatgcacggccggtgatgttaagagttaaatctttctttgtttctgttcatctgccaaagttctttggaagtgAGAATCTTGATGATGCTGCATcggcaataa	ptc-miR172a	AGAATCTTGATGATGCTGCAT	3'	Yes	gp3	....((((.((((.((((((((((((((((.(((((....))..(((.(((((.....(((..((((......))))..)))..))))).)))..............))).)))))))))))))))).)))).))))...	133	41.4	-54.6	0.9	62.3333	13.3333	4	11	107	66	11.6667	11.6667	141	106	16.6667	12.3333	169.833	33.3333	9	11.3333	83.3202	24.2354	6.51167	11.1982	79.9883	70.7528	7.26858	7.25677	145.423	110.225
19	28	ath-miR172a	AGAATCTTGATGATGCTGCAT	21						2	ath-MIR172b,gma-MIR172g,	ath-MIR172b	aggcGCAGCACCATTAAGATTCACatggaaattgataaataccctaaattagggttttgatatgtatatgAGAATCTTGATGATGCTGCATcaac	ath-miR172a	AGAATCTTGATGATGCTGCAT	3'	Yes	gp3	.(..((((((.(((((((((((.((((...((...((((.((((((...))))))))))..))...)))).))))))))))).))))))..)...	91	35.8	-36.2	1.1	62.3333	13.3333	4	11	107	66	11.6667	11.6667	141	106	16.6667	12.3333	169.833	33.3333	9	11.3333	83.3202	24.2354	6.51167	11.1982	79.9883	70.7528	7.26858	7.25677	145.423	110.225
20	29	sly-miR319c-5p_2ss8CT15CT	AGAGCTTTCTTCAGTCCACTC	21						63	gma-MIR319a,amg-MIR319,ctr-MIR319,aau-MIR319,vun-MIR319a,hbr-MIR319,aqc-MIR319,cca-MIR319,rco-MIR319c,rco-MIR319a,rco-MIR319b,sly-MIR319c,sly-MIR319b,bra-MIR319,lus-MIR319a,lus-MIR319b,lus-MIR159b,mes-MIR319c,mes-MIR319a,mes-MIR319d,mes-MIR319b,mes-MIR319e,mes-MIR319h,mes-MIR319g,nta-MIR319b,nta-MIR319a,vvi-MIR319b,vvi-MIR319f,vvi-MIR319c,vvi-MIR319g,ppe-MIR319a,aly-MIR319a,aly-MIR319b,aly-MIR159…	sly-MIR319c	ggaatggtccaagAGAGCTTCCTTCAGCCCACTCacggaggagaaatggggttgaattagctgccgactcattcatccaaccactcagtagaaaggataggttttgtgctactgtgattgagtgaatgatgcgggagatagttttctatccctctctttccttgCTTGGACTGAAGGGAGCTCCttttccccatt	sly-miR319c-5p	AGAGCTTCCTTCAGCCCACTC	5'	Diff	gp3	......((((...((((.(((.(((((..((((((((((...(..((..((..((((((((((((..((.(((..(((((((..((..(((((((((((..........)))))))))))..))..)))))))..))).))...)))))))))))).))..))..)...))))))))))..))))).)))..))))..)))).....	196	42	-92.7	1.1	113	0	0	0	0	0	0	0	185	51	0	0	80	0	0	0	151.046	0	0	0	0	0	0	0	190.803	53.0328
20	30	gma-miR319a	TTGGACTGAAGGGAGCTCCC	20						63	gma-MIR319a,amg-MIR319,ctr-MIR319,aau-MIR319,vun-MIR319a,hbr-MIR319,aqc-MIR319,cca-MIR319,rco-MIR319c,rco-MIR319a,rco-MIR319b,sly-MIR319c,sly-MIR319b,bra-MIR319,lus-MIR319a,lus-MIR319b,lus-MIR159b,mes-MIR319c,mes-MIR319a,mes-MIR319d,mes-MIR319b,mes-MIR319e,mes-MIR319h,mes-MIR319g,nta-MIR319b,nta-MIR319a,vvi-MIR319b,vvi-MIR319f,vvi-MIR319c,vvi-MIR319g,ppe-MIR319a,aly-MIR319a,aly-MIR319b,aly-MIR159…	gma-MIR319b	taagtcctaagcgacggtaagagagctttcttcagtccacttatgggtgacaataagatttcaattagctgccgactcattcatccaaatgctgagtgaaagcgaagaaagatactcagcaaatgagtgaatgatgcgggagacaaattgattcttaagtttcctgtacTTGGACTGAAGGGAGCTCCCtttttcttttgaatcttct	gma-miR319a	TTGGACTGAAGGGAGCTCCC	3'	Yes	gp3	......((((...((((.(((.(((((..((((((((((...(..((..((..((((((((((((..((.(((..(((((((..((..(((((((((((..........)))))))))))..))..)))))))..))).))...)))))))))))).))..))..)...))))))))))..))))).)))..))))..)))).....	196	42	-92.7	1.1	1424	41	8	0	158	306	8	310	3810	1892	441	15	1602	20	0	25	1903.44	74.5239	13.0233	0	118.114	328.035	4.98417	192.823	3929.51	1967.41
21	31	tcc-miR390a	AAGCTCAGGAGGGATAGCGCC	21						49	tcc-MIR390b,csi-MIR390,lja-MIR390b,lja-MIR390a,rco-MIR390b,rco-MIR390a,sly-MIR390b,sly-MIR390a,ghr-MIR390b,ghr-MIR390a,ghr-MIR390c,cpa-MIR390b,cpa-MIR390a,tcc-MIR390a,bna-MIR390b,bra-MIR390,bna-MIR390c,bna-MIR390a,lus-MIR390c,lus-MIR390a,lus-MIR390b,lus-MIR390d,nta-MIR390b,nta-MIR390c,nta-MIR390a,vvi-MIR390,ppe-MIR390,aly-MIR390a,aly-MIR390b,mdm-MIR390c,mdm-MIR390d,mdm-MIR390a,mdm-MIR390e,mdm-MIR…	tcc-MIR390a	ttagtatagaagagcctgttAAGCTCAGGAGGGATAGCGCCattgatgatcttgaatcttatggattgtataatctgatcctcattagcgctatccatcctgagtttcatcggttcttcttgctcttgc	tcc-miR390a	AAGCTCAGGAGGGATAGCGCC	5'	Yes	gp3	..((((.(((((((((..(.((((((((((..((((((((((.((.((.((..(((.....)))....)).)))).))))))))))..)))))))))).)..))))))))))))).....	113	45.8	-57.3	1	79.5	96.5	110.5	157	373.5	486.5	781	364.5	294	190.5	1239.5	124.5	326.5	1114	235.5	393.5	106.267	175.404	179.885	159.829	279.212	521.534	486.579	226.722	303.222	198.093
21	32	lja-miR390a-3p_1ss8CT	CGCTATCTATCCTGAGTTTCA	21						49	tcc-MIR390b,csi-MIR390,lja-MIR390b,lja-MIR390a,rco-MIR390b,rco-MIR390a,sly-MIR390b,sly-MIR390a,ghr-MIR390b,ghr-MIR390a,ghr-MIR390c,cpa-MIR390b,cpa-MIR390a,tcc-MIR390a,bna-MIR390b,bra-MIR390,bna-MIR390c,bna-MIR390a,lus-MIR390c,lus-MIR390a,lus-MIR390b,lus-MIR390d,nta-MIR390b,nta-MIR390c,nta-MIR390a,vvi-MIR390,ppe-MIR390,aly-MIR390a,aly-MIR390b,mdm-MIR390c,mdm-MIR390d,mdm-MIR390a,mdm-MIR390e,mdm-MIR…	lja-MIR390a	ggagaatctgttAAGCTCAGGAGGGATAGCGCCatgatatatattgatgcagtttctattgtcttcaatattggtctttggCGCTATCCATCCTGAGTTTCAtgggttcttc	lja-miR390a-3p	CGCTATCCATCCTGAGTTTCA	3'	Diff	gp3	..((((.(((((((((..(.((((((((((..((((((((((.((.((.((..(((.....)))....)).)))).))))))))))..)))))))))).)..))))))))))))).....	113	45.8	-57.3	1	8	24	12	13	26	93	88	49	22	12	142	8	13	105	68	54	10.6935	43.6237	19.535	13.2342	19.4364	99.6971	54.8258	30.4784	22.6901	12.4783
22	33	ath-miR390a-5p	AAGCTCAGGAGGGATAGCGCC	21						13	ath-MIR390b,lja-MIR390a,lja-MIR390b,sly-MIR390b,sly-MIR390a,mes-MIR390,aly-MIR390b,aly-MIR390a,stu-MIR390,ath-MIR390a,ptc-MIR390d,gma-MIR390a,gma-MIR390c,	ath-MIR390a	gtagagaagaatctgtaAAGCTCAGGAGGGATAGCGCCatgatgatcacattcgttatctattttttggCGCTATCCATCCTGAGTTTCAttggctcttcttactac	ath-miR390a-5p	AAGCTCAGGAGGGATAGCGCC	5'	Yes	gp3	(((((..((((((..(((((((((.(((((((((((.((....)).(((((((((((.........))))))).))))......))))))))))).)))))))))..))))))..)))))	120	44.2	-58.2	1.1	79.5	96.5	110.5	157	373.5	486.5	781	364.5	294	190.5	1239.5	124.5	326.5	1114	235.5	393.5	106.267	175.404	179.885	159.829	279.212	521.534	486.579	226.722	303.222	198.093
23	34	cpa-miR393_R-1	TCCAAAGGGATCGCATTGATC	21						48	cpa-MIR393,htu-MIR393c,htu-MIR393a,htu-MIR393b,csi-MIR393,rco-MIR393,ghr-MIR393,tcc-MIR393a,tcc-MIR393b,bna-MIR393,lus-MIR393b,lus-MIR393d,lus-MIR393a,lus-MIR393c,mes-MIR393c,mes-MIR393b,mes-MIR393d,mes-MIR393a,vvi-MIR393b,vvi-MIR393a,ppe-MIR393a,ppe-MIR393b,aly-MIR393a,aly-MIR393b,mdm-MIR393a,mdm-MIR393f,mdm-MIR393b,mdm-MIR393c,mdm-MIR393d,mdm-MIR393e,stu-MIR393,ath-MIR393b,ath-MIR393a,ptc-MIR39…	cpa-MIR393	TCCAAAGGGATCGCATTGATCCtttacaaggtgaaagcaatctatatatatatatgtgtgtgtgtgtatataagtctgtctcctgtatatatagagtttaggatcatgctatccctttggatt	cpa-miR393	TCCAAAGGGATCGCATTGATCC	5'	Diff	gp3	(((((((((((.(((.(((((((..((.........(((..((((((((((((((....))))))))))))).)..)))...((((....)))).))..)))))))))).)))))))))))..	121	35	-48	1.1	14	34	5	7	46.5	67	4.5	17	88.5	95	8.5	4	24.5	257	7	30	18.7136	61.8003	8.13959	7.12613	34.7613	71.8248	2.80359	10.5742	91.2761	98.7866
23	35	aly-miR393a-3p_1ss12TC	ATCATGCTATCCCTTTGGATT	21						48	cpa-MIR393,htu-MIR393c,htu-MIR393a,htu-MIR393b,csi-MIR393,rco-MIR393,ghr-MIR393,tcc-MIR393a,tcc-MIR393b,bna-MIR393,lus-MIR393b,lus-MIR393d,lus-MIR393a,lus-MIR393c,mes-MIR393c,mes-MIR393b,mes-MIR393d,mes-MIR393a,vvi-MIR393b,vvi-MIR393a,ppe-MIR393a,ppe-MIR393b,aly-MIR393a,aly-MIR393b,mdm-MIR393a,mdm-MIR393f,mdm-MIR393b,mdm-MIR393c,mdm-MIR393d,mdm-MIR393e,stu-MIR393,ath-MIR393b,ath-MIR393a,ptc-MIR39…	aly-MIR393a	agcaactagaggaaggaTCCAAAGGGATCGCATTGATCCtaataaaggtgaattaccccaatcttttcttaataattagcaaacaaatcaaaaaaatttgcttggttttggATCATGCTATCTCTTTGGATTcatccttcggtagct	aly-miR393a-3p	ATCATGCTATCTCTTTGGATT	3'	Diff	gp3	(((((((((((.(((.(((((((..((.........(((..((((((((((((((....))))))))))))).)..)))...((((....)))).))..)))))))))).)))))))))))..	121	35	-48	1.1	0	0	0	0	0	4	0	0	9	5	0	0	0	16.5	0	0	0	0	0	0	0	4.28805	0	0	9.28232	5.19929
24	36	gma-miR393a	TCCAAAGGGATCGCATTGATC	21						7	gma-MIR393a,gma-MIR393e,gma-MIR393d,gma-MIR393f,gma-MIR393c,gma-MIR393g,mtr-MIR393b,	gma-MIR393g	agaggaggcaTCCAAAGGGATCGCATTGATCccaaatccaagcttcaatgttcttctctctttctcactcaaaatgttaattttaTTTGGGATCATGCTATCCCTTtggatgtctcctt	gma-miR393a	TCCAAAGGGATCGCATTGATC	5'	Yes	gp3	.((((((..((((((((((((.((((.((((((((((..((.....((((((....................))))))..))..)))))))))))))).))))))))))))..)))))).	118	39.2	-48.3	1	14	34	5	7	46.5	67	4.5	17	88.5	95	8.5	4	24.5	257	7	30	18.7136	61.8003	8.13959	7.12613	34.7613	71.8248	2.80359	10.5742	91.2761	98.7866
25	37	gma-miR394a-5p_R+1_1ss18TA	TTGGCATTCTGTCCACCACCA	21						19	gma-MIR394f,ahy-MIR394,ghr-MIR394b,cpa-MIR394b,cpa-MIR394a,tcc-MIR394b,lus-MIR394b,mes-MIR394c,nta-MIR394,vvi-MIR394a,vvi-MIR394c,ppe-MIR394b,ptc-MIR394a,gma-MIR394e,gma-MIR394d,gma-MIR394g,gma-MIR394b,gma-MIR394a,gma-MIR394c,	gma-MIR394c	cagagtttcTTGGCATTCTGTCCACCTCCacttccactttcagttccatggatctctctctctttttggccctatctacgtactcggaggtggacatactgccaatagag	gma-miR394a-5p	TTGGCATTCTGTCCACCTCC	5'	Diff	gp3	...((((..((((((...(((.(((((((((...........((....))..))))))))).)))...))))))..))))....	77	50	-37.9	0.9	48	14	0	0	0	10	0	0	44	0	0	0	0	15	0	0	64.161	25.4472	0	0	0	10.7201	0	0	45.3802	0
26	38	ppe-miR397_1ss10GC	TCATTGAGTCCAGCGTTGATG	21						17	ppe-MIR397,ssl-MIR397,csi-MIR397,rco-MIR397,tcc-MIR397,bna-MIR397a,bna-MIR397b,lus-MIR397b,nta-MIR397,vvi-MIR397a,aly-MIR397a,aly-MIR397b,ath-MIR397a,ptc-MIR397a,gma-MIR397a,gma-MIR397b,mtr-MIR397,	ppe-MIR397	aagggtggctcaaaatcaatcatgcagatgcagattatgagagcagtggaggttccagattgaagaaacaTCATTGAGTGCAGCGTTGATGaattgaaattctttcgaaatttcatcagcgctgcacccaattatgtttctatccaattttggcaaagtactggctggcttctctggtcttcttctttcttttagccctttt	ppe-miR397	TCATTGAGTGCAGCGTTGATG	5'	Diff	gp3	((((((.((((...((.((((.(((....)))))))))..)))).(..((((..(((((....((((((((.((((.((((((((((((((((((((((...))))))...)))))))))))))))).)))).))))))))..........(((..(((....))).)))..))))).))))..).........))))))..	78	40.6	-74.9	0.9	0	0	5.5	11.5	0	0	54.5	26.5	0	0	89.5	50	0	26.5	24.5	10	0	0	8.95355	11.7072	0	0	33.9546	16.4832	0	0
27	39	aly-miR399f-3p	TGCCAAAGGAGATTTGCCCTG	21						49	aly-MIR399f,pvu-MIR399a,vun-MIR399a,vun-MIR399b,cca-MIR399,csi-MIR399d,csi-MIR399c,csi-MIR399e,rco-MIR399a,ghr-MIR399d,ghr-MIR399e,tcc-MIR399g,tcc-MIR399i,tcc-MIR399h,lus-MIR399b,lus-MIR399d,mes-MIR399f,mes-MIR399a,vvi-MIR399a,vvi-MIR399h,vvi-MIR399c,vvi-MIR399b,aly-MIR399c,aly-MIR399g,aly-MIR399b,aly-MIR399i,aly-MIR399d,mdm-MIR399c,mdm-MIR399j,mdm-MIR399b,mdm-MIR399i,mdm-MIR399a,ath-MIR399a,ath-…	aly-MIR399f	atgaaagatacatagagaaggtgcaaatacattacaGGGCAAGATCACCATTGGCAGAaatctattacttcattcttgcataatatgcattaatgtttgtggtgagctctcTGCCAAAGGAGATTTGCCCTGtaattctcttgcgccaatgttttagatatcttcat	aly-miR399f-3p	TGCCAAAGGAGATTTGCCCTG	3'	Yes	gp3	(((.((((((..(((((..(((((((....(((((((((((.((((.((.((((((((..((.(..((..((((..(((((...)))))..))))...))..)))....)))))))).)).)))))))))))))))....)))))))....)))))..)))))))))	167	37.1	-65.5	1.1	0	0	0	0	10	0	0	5.5	0	0	0	0	10	4	0	0	0	0	0	0	7.47554	0	0	3.42105	0	0
28	40	ppe-miR399b_L-2R+2	TGCCAAAGGAGAATTGCCCTG	21						1	ppe-MIR399b,	ppe-MIR399b	tgaataacagggcaattttcctttggcagaaataattatatatatttggtgcatttactctcaatctcaagtaccggcaccgaatgcttTCTGCCAAAGGAGAATTGCCCtgccattca	ppe-miR399b	TCTGCCAAAGGAGAATTGCCC	3'	Diff	gp3	.((((..(((((((((((((((((((((((((..........((((((((((...((((..........))))...)))))))))).)))))))))))))))))))))))))..)))).	117	39.5	-59.5	1.3	0	0	0	0	0	0	0	0	0	0	0	0	0	4	0	0	0	0	0	0	0	0	0	0	0	0
29	41	tcc-miR403a	TTAGATTCACGCACAAACTCG	21						32	tcc-MIR403a,har-MIR403a,hpe-MIR403a,htu-MIR403b,htu-MIR403e,htu-MIR403c,htu-MIR403a,htu-MIR403d,csi-MIR403,rco-MIR403a,rco-MIR403b,tcc-MIR403b,bna-MIR403,bra-MIR403,mes-MIR403b,mes-MIR403a,vvi-MIR403b,vvi-MIR403c,vvi-MIR403f,vvi-MIR403d,vvi-MIR403a,vvi-MIR403e,ppe-MIR403,aly-MIR403a,aly-MIR403b,mdm-MIR403a,mdm-MIR403b,ath-MIR403,ptc-MIR403b,ptc-MIR403c,ptc-MIR403a,ptc-MIR403d,	tcc-MIR403b	agtagatgggacacatctccagtttgtgcctggatcagacgccatcaaggccgtcaatttttcaatcatgccatcgatggtgTTAGATTCACGCACAAACTCGtgatctgtctcctcttggaa	tcc-miR403a	TTAGATTCACGCACAAACTCG	3'	Yes	gp3	....((..(((((((((...(((((((((((((((((((((((((..((((((((.............)))).))))))))..)))))))))))))))))))))...)))))))))..))......	116	37.3	-51.7	1.1	50	82	33	120	155	165	206	129	254	126	222	68	434	477	109	263	66.8344	149.048	53.7213	122.162	115.871	176.882	128.342	80.2392	261.968	131.022
30	42	gma-miR408a-3p_L-1R+1	TGCACTGCCTCTTCCCTGGCT	21						21	gma-MIR408c,dpr-MIR408,vun-MIR408,ahy-MIR408,cca-MIR408,csi-MIR408,rco-MIR408,cpa-MIR408,lus-MIR408a,mes-MIR408,nta-MIR408,vvi-MIR408,aly-MIR408,mdm-MIR408a,stu-MIR408b,ath-MIR408,ptc-MIR408,gma-MIR408b,gma-MIR408d,gma-MIR408a,mtr-MIR408,	gma-MIR408a	gagacaggacaaagCAGGGGAACAGGCAGAGCATGgatggagctatcaacacaatattgtcaagaaactgagagtgagaggagaaatatgttgtggttctgctcATGCACTGCCTCTTCCCTGGCtctgtctc	gma-miR408a-3p	ATGCACTGCCTCTTCCCTGGC	3'	Diff	gp3	((((((((..(((((.((((((.((((((..(((((((.((((.((...((.(((......))).))..))...(((....))))))))))))))..)))))).)))))).)))))..))))))))	126	47.6	-59	1	0	0	0	0	0	6.33333	6	0	39	15.3333	97.6667	0	0	108.5	5.66667	0	0	0	0	0	0	6.78941	3.73813	0	40.2234	15.9445
31	43	mdm-miR408a_L-1R+1	TGCACTGCCTCTTCCCTGGCT	21						1	mdm-MIR408a,	mdm-MIR408a	ggaaagagagttaataagACAGGGAAGAGGTAGAGCATGgatggagttctcaagagcaaaatagagctcttgtgactctactcATGCACTGCCTCTTCCCTGGCtttgcctccctctccttcc	mdm-miR408a	ATGCACTGCCTCTTCCCTGGC	3'	Diff	gp3	((((.(((((.....(((.((((((((((((((.(((((..(((((((..(((((((........))))))).)))))))..))))).)))))))))))))).))).......))))).))))	123	48.8	-70.1	1.2	0	0	0	0	0	6.33333	6	0	39	15.3333	97.6667	0	0	108.5	5.66667	0	0	0	0	0	0	6.78941	3.73813	0	40.2234	15.9445
32	44	mdm-miR477b_1ss20GC	ACTCTCCCTCAAGGGCTTCCAC	22						2	mdm-MIR477b,stu-MIR477a,	mdm-MIR477b	caaggcatttttgttgctcACTCTCCCTCAAGGGCTTCGACcaatgtcagacatgrcgagctcgaagacttggggagagtgaataaaaagtgtcttg	mdm-miR477b	ACTCTCCCTCAAGGGCTTCGAC	5'	Diff	gp3	((((((((((((.....((((((((((.((((..((((((....((.((....)).))...)))))).))))))))))))))...))))))))))))	97	47.4	-43.9	1	0	0	0	0	211	49	0	8	8	0	0	0	105	235	0	0	0	0	0	0	157.734	52.5286	0	4.97607	8.25095	0
33	45	mes-miR530a_R+1_1ss20TG	TGCATTTGCACCTGCACCTGA	21						16	mes-MIR530a,htu-MIR530,csi-MIR530a,tcc-MIR530b,tcc-MIR530a,lus-MIR530b,lus-MIR530a,mes-MIR530b,ppe-MIR530,stu-MIR530,ptc-MIR530a,gma-MIR530e,gma-MIR530a,gma-MIR530d,gma-MIR530c,gma-MIR530b,	mes-MIR530b	gccaaaatgttgcctttatcTGCATTTGCACCTGCACCTTacttttgtttctttaaaaatttcaacaatcaagatccttgtttttcctctcatttctagagtgtcagagaaactttttgatccaagaaaagagaggtgcaggtgtaagtgcaggtgaatgccattttggt	mes-miR530a	TGCATTTGCACCTGCACCTT	5'	Diff	gp3	(((..(((((((..((((((((((((..((..((................(((((((.(((.................................)))))))))).(((....))).))..))..))))))))))))..)))))))..)))	150	40.7	-56.198	0.9	619	258	0	0	257.5	106.5	0	34.5	1440.5	1707	11	0	247	198.5	0	12	827.41	468.955	0	0	192.495	114.169	0	21.4593	1485.69	1775.04
34	46	ppe-miR535b	TGACGACGAGAGAGAGCACGC	21						15	ppe-MIR535b,aqc-MIR535,csi-MIR535,rco-MIR535,cpa-MIR535,mes-MIR535a,mes-MIR535b,vvi-MIR535a,vvi-MIR535b,vvi-MIR535c,ppe-MIR535a,mdm-MIR535d,mdm-MIR535a,mdm-MIR535c,mdm-MIR535b,	ppe-MIR535b	gagccgagctatgattgacgttgttTGACGACGAGAGAGAGCACGCttgtcggcacccatgaaagggccatggatgtttacgggcgtgctctctcttgttgtcatacagtctatctgctggttcggatc	ppe-miR535b	TGACGACGAGAGAGAGCACGC	5'	Yes	gp3	((.((((((((.(((.(((..(((.(((((((((((((((((((((..((..(((.(((((.......))))).)))..))..))))))))))))))))))))).)))))).)))...)))))))).))	129	52.7	-73.9	1.1	1038	768	945	2882	780	2214	6542	3882	1582	1676	12712	554	1614	6576	1650	2881	1387.48	1395.96	1538.38	2933.93	583.092	2373.43	4075.8	2414.64	1631.63	1742.8
35	47	ath-miR858b	TTCGTTGTCTGTTCGACCTTG	21						5	ath-MIR858b,ppe-MIR858,aly-MIR858,mdm-MIR858,ath-MIR858a,	ath-MIR858b	cctacccgaagggttttggagagtagacaaagagacaaacatagaggtgtgagtttggtttggttttgggttttggggggttggtagtgtttgaggtccatatgcctcgatcttccgcttctattaattaattttctctattagaaatattatctaattattccactccatcgaaccatgcacatatataatgatatgtataagcccatcaaagtttttgaattcagtgcaaacacttgtcaaaggagcagtcccgatctggttccatcttatcTTCGTTGTCTGTTCGACCTTGgctttggc	ath-miR858b	TTCGTTGTCTGTTCGACCTTG	3'	Yes	gp3	.....((((((......((.((..((((((.((((.........((((((.....(((((((((..((((.....((..((.((.((...(((((((......))))))).)).))))..)).................((((((.......))))))...))))....))))))))).((((.((((((......))))))......(((((...))))).....))))..))))))......(((((((.......)).)))))......))))..))))))..))..))....)))))).	297	40.3	-70.3	0.6	1288	2865	20	0	3362	1074	0	62	3109	3336	21	11	2631	4500	0	0	1721.65	5207.58	32.5584	0	2513.28	1151.34	0	38.5646	3206.53	3468.97
36	48	ptc-miR1448_L+1R+1	TCTTTCCAACGCCTCCCATACC	22						1	ptc-MIR1448,	ptc-MIR1448	gttacgggtatgggaggattggacagtactgcttggttttaattaaccaaagtctgttCTTTCCAACGCCTCCCATACcggtaat	ptc-miR1448	CTTTCCAACGCCTCCCATAC	3'	Diff	gp3	(((((.(((((((((((.(((((.((.((.((((((((......)))).))))..)).)).)))))..))))))))))).)))))	85	44.7	-42.4	1.1	0	0	0	0	0	11	0	0	0	0	0	0	0	0	0	0	0	0	0	0	0	11.7921	0	0	0	0
37	49	ppe-miR1511-3p_L+1R-4	AACCTGGCTCTGATACCA	18						1	ppe-MIR1511,	ppe-MIR1511	atCGTGGTATCAGAGTCATGTTAtttgcatgttgccaccacatatgtgttgctcatataaataACCTGGCTCTGATACCATAAC	ppe-miR1511-3p	ACCTGGCTCTGATACCATAAC	3'	Diff	gp3	...(((((((((((((((.(((((((..(((..((...(((....)))..)).)))..))))))).)))))))))))))))...	78	39.3	-37.5	1.1	0	10	0	0	0	8	0	0	0	0	0	0	25.5	13.5	0	4.5	0	18.1766	0	0	0	8.57609	0	0	0	0
38	50	csi-miR1515_1ss16AG	TCATTTTTGCGTGCAGTGATCC	22						1	csi-MIR1515,	csi-MIR1515	tcgatttgcaTCATTTTTGCGTGCAATGATCCcgaatttgctctcttactcaactttctttttaatttacaaatattcatgtttattggtttgaaaaataggaaaaaaaaattctaatttttgttaacggggatctggatcattcacgcaaaaatgatttgactcgtgagttggc	csi-miR1515	TCATTTTTGCGTGCAATGATCC	5'	Diff	gp3	((((((..(((((((((((((((.((((((((.((((((....(((((......((((....((((..(((........)))..))))....))))..))))).....))))))..(((..((....))..)))..)))))))))))))))))))))).......)..)))))).	174	32	-45.1	0.8	512	591	215	549	794	774	202	427	731	1031	226	104	429	1962	152	284	684.384	1074.23	350.003	558.892	593.558	829.737	125.85	265.598	753.93	1072.09
39	51	vvi-miR3630-3p_L+3_1ss17CA	GTCTTTGGGAATCTCTATGATGCAC	25						1	vvi-MIR3630,	vvi-MIR3630	cagtatggttgTGCAAGTGACGATATCAGACAgggacatcagcacctccaatggagaatgatgatttgtcTTTGGGAATCTCTCTGATGCACaagcatattg	vvi-miR3630-3p	TTTGGGAATCTCTCTGATGCAC	3'	Diff	gp3	(((((((.(((((((((.((.(((..(((((((...(((((....((((...))))..)))))..))))))...)..))))).))..))))))).)))))))	102	44.1	-34.7	0.8	0	89	0	0	0	32	0	99	0	0	37	0	571	83	25	19	0	161.771	0	0	0	34.3044	0	61.5789	0	0
40	52	rgl-miR5139_L-1	AACCTGGCTCTGATACCA	18						2	rgl-MIR5139,cpa-MIR8155,	rgl-MIR5139	agttatatcaAAACCTGGCTCTGATACCAagaggaattgatgatctttattcatgaaaagagagaactatatatagatatacaacgatatgtcgaagacgaaatttttatctcaatatggggttattagaccaactttgggtggca	rgl-miR5139	AAACCTGGCTCTGATACCA	5'	Diff	gp3	.(..((....(((..(((.(((((((((........((.((((.......)))).))..((((............((((((......))))))................)))).......)).))))))))))..)))..))..).	144	33.6	-23.6	0.5	0	10	0	0	0	8	0	0	0	0	0	0	25.5	13.5	0	4.5	0	18.1766	0	0	0	8.57609	0	0	0	0
41	53	gma-miR6300_R+5	GTCGTTGTAGTATAGTGGTGAGT	23						1	gma-MIR6300,	gma-MIR6300	aggtaaaaatacttaccactatattacaacaacttgtttgtgaaattcaatggtaattttaaataataaatgttttaatattaccgatagcatttgattatatttttgttttaaagttacatttgattatatcgctatcggctataatgtaagtcatattcatccaatatcatgcaacttttttgtatagatatattaatattactcgataatcatcaaGTCGTTGTAGTATAGTGGtaagtattcccgcc	gma-miR6300	GTCGTTGTAGTATAGTGG	3'	Diff	gp3	.(((...(((((((((((((((((((((((.(((((...((((...((...((((((.((((.......(((.....((((((((((((((((.((((((......(((.........)))..)))))).)).))))))))...))))))....))).........(((((((((((.....)))))).))))).)))).)))))).))...))))))))).)))))))))))))))))))))))...)))	250	25.9	-72	1.1	2320	8353	780	1210	1574	12268	3322	2179	1166	1229	3244	2733	7996	6963	704	2449	3101.12	15182.9	1269.78	1231.8	1176.65	13151.4	2069.68	1355.36	1202.58	1277.99
42	54	ptc-miR6478_R+2_1ss21GA	CCGACCTTAGCTCAGTTGGTAGA	23						1	ptc-MIR6478,	ptc-MIR6478	aCCGACCTTAGCTCAGTTGGTGgagcggagggctgtaggtcgctggttggattccggcaaggtcggatttcaattttgtaatttcttttctcaccgaccttagttcagaagttgcattgttttgtctgttgaggtggt	ptc-miR6478	CCGACCTTAGCTCAGTTGGTG	5'	Diff	gp3	(((.((((((((.(((.(..((.(((...(..(((.((((((.((((((((.((((((...)))))).)))))).................)).)))))))))..)....))).))..)..)))...)))))))))))	138	47.8	-44.3	0.7	61	249	30	142	87	548	232	126	34	79	144	948	435	149	33	162	81.538	452.596	48.8376	144.559	65.0372	587.462	144.541	78.3731	35.0665	82.1488
43	55	stu-miR8016_1ss7GT	ATTTTTTAATGGAAGGCCCATGTG	24						2	stu-MIR8016,gma-MIR159e,	stu-MIR8016	catggtcttttctttcaaaaatatattatattaggagttgctatatATTTTTGAATGGAAGGCCCATGTG	stu-miR8016	ATTTTTGAATGGAAGGCCCATGTG	3'	Diff	gp3	(((((.((((((.(((((((((((((..((........))..))))))))))))).)))))).)))))..	68	30	-23.8	1.1	86	20	0	0	70	11	0	0	46	31	0	0	22	17	0	0	114.955	36.3531	0	0	52.3288	11.7921	0	0	47.443	32.2356
1	1	col-miRn-5p-1103_1978	GAAAAATAATGTGTGGTTCAGATT	24	comp63481_c0	+	251	399	tgtatacaaaatttatgtacagaattatacttaGAAAAATAATGTGTGGTTCAGATTcaattctggtatgataaaccccagatcttgaatgAGTTTGAATCACATATTATATTTTCcgagtatttttctgtgtatgaattttgtgttag	0						5'	New	gp4	...(((((((((((((..((((((..(((((..((((((((((((((((((((((((((..(((((...........))))).......))))))))))))))))))))).)))))..)))))..))))))..)))))))))))))...	143	27.5	-62.4	1.5	27	71	19	106	169	162	460	67	24	40	401	47	191	180	183	97	36.0906	129.054	30.9305	107.91	126.337	173.666	286.59	41.6746	24.7528	41.5943
1	2	col-miRn-3p-207095_14	AGTTTGAATCACATATTATATTTTC	25	comp63481_c0	+	251	399	tgtatacaaaatttatgtacagaattatacttaGAAAAATAATGTGTGGTTCAGATTcaattctggtatgataaaccccagatcttgaatgAGTTTGAATCACATATTATATTTTCcgagtatttttctgtgtatgaattttgtgttag	0						3'	New	gp4	...(((((((((((((..((((((..(((((..((((((((((((((((((((((((((..(((((...........))))).......))))))))))))))))))))).)))))..)))))..))))))..)))))))))))))...	143	27.5	-62.4	1.5	0	0	0	0	0	14	0	0	0	0	0	0	0	0	0	0	0	0	0	0	0	15.0082	0	0	0	0
2	3	col-miRn-5p-2142_1228	ATTGTGTGGTTGAGATTTAATGAC	24	comp29957_c0	-	11	199	ctataatttacaagtaaggatctctagagtttttttttcctaaagtttcttagagtggtgcATTGTGTGATTGAGATTTAATGACaagtcacattaattttttagtATTAAATCTCAACCACACAATACAcgactttaagaaactttaagaaaaaatcactatggaggatctttggtgataatttactt	0						5'	New	gp4	...(((.(((((..((((((((((((.(((..(((((((.((((((((((((((((.(((.((((((((.(((((((((((((..(((............)))..))))))))))))).)))))))).))).)))))))))))))))).)))))))..))).))))).))))))).)).))).)))...	183	28.6	-71.9	1.3	89	43	130	112	120	34	197	169	142	102	177	78	26	81	197	129	118.965	78.1592	211.629	114.018	89.7065	36.4484	122.735	105.12	146.454	106.066
2	4	col-miRn-3p-18781_243	ATTAAATCTCAACCACACAATGCA	24	comp29957_c0	-	11	199	ctataatttacaagtaaggatctctagagtttttttttcctaaagtttcttagagtggtgcATTGTGTGATTGAGATTTAATGACaagtcacattaattttttagtATTAAATCTCAACCACACAATACAcgactttaagaaactttaagaaaaaatcactatggaggatctttggtgataatttactt	0						3'	New	gp4	...(((.(((((..((((((((((((.(((..(((((((.((((((((((((((((.(((.((((((((.(((((((((((((..(((............)))..))))))))))))).)))))))).))).)))))))))))))))).)))))))..))).))))).))))))).)).))).)))...	183	28.6	-71.9	1.3	23	38	0	40	100	43	41	11	50	68	56	69	107	20	52	19	30.7438	69.0709	0	40.7207	74.7554	46.0965	25.5439	6.8421	51.5684	70.7104
3	5	col-miRn-5p-236956_11	GGAATGTTGGTTGGCTCGATGTCT	24	comp50237_c0	+	134	268	tttgtgtatggaagtatttgaggGGAATGTTGGTTGGCTCGATGTCTtcacaagaattgtcggacaaaagggttcgatcaacaagtgaAGATATCGGACCAGGCTTCATTCCtctcaaaataagtccatcatcac	0						5'	New	gp4	...(((.(((((..(((((((((((((((..((((((..((((((((((((.....(((((((((......)))))).)))...))))))))))))..))).))).))))))))))))).))..))))))))...	129	42.2	-61	1.1	0	0	0	0	0	0	0	0	0	0	0	0	0	11	0	0	0	0	0	0	0	0	0	0	0	0
3	6	col-miRn-3p-61053_79	AGATATCGGACCAGGCTTCATTCC	24	comp50237_c0	+	134	268	tttgtgtatggaagtatttgaggGGAATGTTGGTTGGCTCGATGTCTtcacaagaattgtcggacaaaagggttcgatcaacaagtgaAGATATCGGACCAGGCTTCATTCCtctcaaaataagtccatcatcac	0						3'	New	gp4	...(((.(((((..(((((((((((((((..((((((..((((((((((((.....(((((((((......)))))).)))...))))))))))))..))).))).))))))))))))).))..))))))))...	129	42.2	-61	1.1	0	0	9	0	35	0	0	0	10	15	0	0	24	0	8	0	0	0	14.6513	0	26.1644	0	0	0	10.3137	15.5979
4	7	col-miRn-3p-210298_13	ACGTCATTTTGATACATTCGAGCC	24	comp37680_c0	-	77	146	atagtttgaatgtattaaaataatgtcattttgggaataaaatgACGTCATTTTGATACATTTGAGCCat	0						3'	New	gp4	...(((..(((((((((((((.(((((((((((....))))))))))).)))))))))))))..)))...	64	25.7	-29.7	1.6	0	0	6.5	0	0	0	0	0	0	0	0	0	0	0	0	0	0	0	10.5815	0	0	0	0	0	0	0
5	7	col-miRn-3p-210298_13	ACGTCATTTTGATACATTCGAGCC	24	comp48083_c0	+	566	641	tttatggctcaaatgtgtcaaaacgatgtaattttgaggataaaatgACGTCATTTTGATACATTCGAGTCatttg	0						3'	New	gp4	...(((((((.((((((((((((.(((((.((((((....)))))).))))).)))))))))))).)))))))...	70	31.6	-30.1	1.3	0	0	6.5	0	0	0	0	0	0	0	0	0	0	0	0	0	0	0	10.5815	0	0	0	0	0	0	0
6	8	col-miRn-5p-120322_33	AAAAGTTTTATCAAATGTCTCATA	24	comp62238_c0	+	1396	1498	gatttaaaaattctatcAAAAGTTTTATCAAATGTCTCATAtgggtgtgcgagtctcACTCATGTGAGACATTTGATAGAAcctttcatagaatttttaaggt	0						5'	New	gp4	..((((((((((((((.(((.((((((((((((((((((((((((((.........)))))))))))))))))))))))))).))).))))))))))))))..	99	31.1	-51.3	1.6	0	0	0	0	0	0	0	0	0	0	0	0	13	0	0	33	0	0	0	0	0	0	0	0	0	0
6	9	col-miRn-3p-136946_27	ACCCATGTGAGACATTTGATAGAA	24	comp62238_c0	+	1396	1498	gatttaaaaattctatcAAAAGTTTTATCAAATGTCTCATAtgggtgtgcgagtctcACTCATGTGAGACATTTGATAGAAcctttcatagaatttttaaggt	0						3'	New	gp4	..((((((((((((((.(((.((((((((((((((((((((((((((.........)))))))))))))))))))))))))).))).))))))))))))))..	99	31.1	-51.3	1.6	0	14	0	0	0	0	0	0	0	13	0	0	0	0	0	0	0	25.4472	0	0	0	0	0	0	0	13.5182
7	10	col-miRn-5p-32910_149	GCTTCTTTTTGCTGCCTCCAC	21	comp50377_c0	+	259	381	ttagggtagtccaattcttatGCTTCTTTTTGCTGCCTCCACtaaattttgtttcccttcggcgaagggaaagaatatttagTGGATGTAGCAAAGAGAAGCTtggaaagggcagtgcccctt	0						5'	New	gp4	...(((((((((..((((...(((((((((((((((.((((((((((.((.(((((((((...))))))))).)).)))))))))).)))))))))))))))..)))).))))..)))))...	117	43.1	-66.9	1.3	0	0	9	11	12	0	14	71	0	0	16	0	0	0	14	13	0	0	14.6513	11.1982	8.97065	0	8.72229	44.1626	0	0
7	11	col-miRn-3p-145806_25	TGGATGTAGCAAAGAGAAGCT	21	comp50377_c0	+	259	381	ttagggtagtccaattcttatGCTTCTTTTTGCTGCCTCCACtaaattttgtttcccttcggcgaagggaaagaatatttagTGGATGTAGCAAAGAGAAGCTtggaaagggcagtgcccctt	0						3'	New	gp4	...(((((((((..((((...(((((((((((((((.((((((((((.((.(((((((((...))))))))).)).)))))))))).)))))))))))))))..)))).))))..)))))...	117	43.1	-66.9	1.3	0	0	0	8	0	0	9	8	0	0	0	0	0	0	0	8	0	0	0	8.14415	0	0	5.60719	4.97607	0	0
8	12	col-miRn-5p-28629_169	ACAGAAATCAATCACAGAATTAGA	24	Tea010_2005-10-30_1/Tea010_A01_008_1	-	346	480	ttctattaatACAGAAATCAATCACAGAATTAGAcataatactttcacatagatataaaattcacaagaagatggaacttacgtcttgtgagaaagtaatgtttgattctgtaattgatttctgtatttttaaac	0						5'	New	gp4	...((..(((((((((((((((.((((((((((((((..(((((((.((((((..(((..((((........))))..)))..)).)))).))))))))))))))))))))).)))))))))))))))..))...	129	25.9	-50.9	1.5	0	21.5	8.5	0	20.5	4.5	10	4.5	0	21	0	0	4.5	5	7	0	0	39.0796	13.8373	0	15.3249	4.82405	6.23021	2.79904	0	21.837
9	12	col-miRn-5p-28629_169	ACAGAAATCAATCACAGAATTAGA	24	comp63584_c0	-	709	843	ttctattaatACAGAAATCAATCACAGAATTAGAcataatactttcacatagatataaaattcacaaaaagatggaatttacctcttgtgagaaagttatgtttgattctgtaattgatttctgtatttttaaac	0						5'	New	gp4	...((..(((((((((((((((.(((((((((((((((((..(((((((.(((..((((.((((........)))).))))..))))))))))..))))))))))))))))).)))))))))))))))..))...	129	24.4	-53.1	1.6	0	21.5	8.5	0	20.5	4.5	10	4.5	0	21	0	0	4.5	5	7	0	0	39.0796	13.8373	0	15.3249	4.82405	6.23021	2.79904	0	21.837
10	13	col-miRn-3p-253727_10	GCGCGGGTCGGGGCGGAGGC	20	comp62653_c0	-	601	668	cccgtctccgccccccggccccgcgtcctccctcgggagggcGCGCGGGTCGGGGCGGCGGCggcggc	0						3'	New	gp4	.(((((.((((((((((((((((((((((((....)))))))))).))))))))).))))).))))).	66	89.7	-65.3	1.1	0	0	0	0	0	0	0	10	0	0	0	0	0	0	0	0	0	0	0	0	0	0	0	6.22009	0	0
11	14	col-miRn-3p-23356_203	AATTCCTCTCCAAATCTCCCAACC	24	comp54918_c0	-	216	362	atctgtttagttggagaatttaagaaggaatttgaaaagaaaaataaaaaaaaataagtaaaatatacatatatttcacttagtttcatatcttttttctttctctttccaAATTCCTTTCCAAATCTCCCAACCaaacaaagcata	0						3'	New	gp4	...(((((.(((((((.((((..(((((((((((.(((((.(((.((((((...(((((.((((((....)))))).)))))..........)))))).))).))))).)))))))))))..)))))))).))).))))).......	137	24.5	-36.8	1	22.5	0	47	53	49.5	0	48	6.5	19	32.5	100	0	6.5	4	85	17.5	30.0755	0	76.5122	53.955	37.0039	0	29.905	4.04306	19.596	33.7954
12	15	col-miRn-3p-33985_144	ACGTCGTTTTGAGACATTCGAGCC	24	comp45317_c0	+	115	293	agcatacctttatatagaaaaaaatgtttggtagctcaaatttgtgtggcccgaataatttgaatgtactaaaacgacgtcattttactcccaaaacgACGTCGTTTTGAGACATTCGAGCTattcaggccataaaaattcggactaccaaacattgttattttatataatagtataga	0						3'	New	gp4	...((((..((((((((((...((((((((((((..(.(((((.(((((((.(((((..((((((((..((((((((((((.((((......)))).))))))))))))..))))))))..))))).))))))).))))).)..))))))))))))....))))))))))..))))...	173	33	-77.3	1.3	0	0	18	24	23	8	15	26	22	0	0	8	0	12	15	0	0	0	29.3025	24.4324	17.1938	8.57609	9.34531	16.1722	22.6901	0
13	16	col-miRn-3p-150062_24	CAAATCCTTCCTCAAATCCCC	21	PB(TT-CAT)6	-	1	154	gtgtttgattgggagattttgggagagatttggaaaaaataaaggaaaaaaatgtgtgaaactatgtgaaatataattatatttttttcacatttcacatacctttttcattttcttttcCAAATCCATCCTCAAATCCCCaaccaaacatagc	0						3'	New	gp4	(((((((.(((((.(((((..(((..(((((((((((...(((.((((((..((((((((...((((((((..............))))))))))))))))..)))))).)))..)))))))))))..)))..)))))))))).)))))))...	151	29.9	-58.7	1.3	0	0	0	8	0	0	0	0	0	0	0	16	0	36	0	0	0	0	0	8.14415	0	0	0	0	0	0
14	17	col-miRn-3p-16403_272	GTTCAGTGAAGCTGTGGAAAG	21	comp36510_c0	+	116	236	aaatgaccctctttgtatttttccacagctttcttgaactgcattagtgaaatcttaatttttttatgattcaattgttgcgGTTCAGTGAAGCTGTGGAAAGatatagatagggtcaagc	0						3'	New	gp4	...(((((((.((((((((((((((((((((..((((((((((..(((..((((.(((.....))).))))..)))..))))))))))..)))))))))))))))))))).)))))))...	115	34.7	-61.3	1.5	0	55	0	0	15	0	0	0	27	87	0	0	0	97	0	0	0	99.971	0	0	11.2133	0	0	0	27.847	90.4677
15	18	col-miRn-3p-152189_23	TGATCGTGTGGTAGCTTCACC	21	comp55682_c0	+	130	240	ttatcgtgcaccactttcagttgaagctgccagcatgatctaaacatacctcctttgttgaggacagattAGATCGTGTGGTAGCTTCACCtgttgttggtgtcacgaaaa	0						3'	New	gp4	...((((((((((....(((.(((((((((((.((((((((((.....((((.......)))).....))))))))))))))))))))).)))....))))).)))))...	105	44.1	-54.4	1.1	0	53	0	0	0	0	9	0	0	0	0	0	0	0	0	0	0	96.3357	0	0	0	0	5.60719	0	0	0
16	19	col-miRn-3p-88988_50	AATGGTTGTGAGTGATTTGGGACA	24	comp299202_c0	+	1	185	atttgagggcgttccccaaggatcccctgcctcaaaaattctgttctcgtgtctcaaattactcataattattgaatatgtattgagattctcaaatattaagattcttaaatgatctAATGGTTGTGAGTGATTTGAGACAaatggacaaaaaattttagagacagtgatctttgccagattgc	0						3'	New	gp4	(((((.(((...))).((((((((..(((.(((.((((((.(((((...(((((((((((((((((((..(((..((.....((((((.(((.........))).))))))...))..)))..)))))))))))))))))))...)))))...)))))).))).))).)))))))).)))))...	182	34.6	-61.9	1	0	0	9	11	0	0	9	0	8	11	0	0	0	0	0	10	0	0	14.6513	11.1982	0	0	5.60719	0	8.25095	11.4384
17	20	col-miRn-3p-27678_175	CATCATTGTGGGTTAAATTGTGAG	24	comp60337_c0	+	232	405	tttgagaaatattagagaccaactcatttaatttcacaaattcacccacagtgatgtggtaaagtagttggacctgtatcattgggtgtaacagatcaaatattgatacctattatgtcaCATCATTGTGGGTTAAATTGTGAGatttttgtgggtttcaaatatttttcatat	0						3'	New	gp4	..(((((((((((.((((((....((...((((((((((.((.(((((((((((((((..(.(((((........((((((.((..((........))..)).))))))))))).)..))))))))))))))).)).))))))))))..))..)))))).)))))))))))...	169	31.6	-68.3	1.2	36	39	24	25	17	65	0	0	32	41	13	22	0	58	0	10	48.1208	70.8885	39.07	25.4505	12.7084	69.6807	0	0	33.0038	42.6342
18	21	col-miRn-5p-166889_20	TTGGGGGATTTGGGAAGGAATT	22	comp63306_c0	+	75	224	tacctatgtttggTTGGGAGATTTGGGAAGGAATTgggatagagaaaaagaaaaagtgtgtgaaactagatatattttattgacatttcatttatatttttcttttttattttcaaatcactttctaaattctccaactaaatacagcat	0						5'	New	gp4	...((.(((((((((((..(((((((((((((.(((..(....((((((((((((....((((((...((((.....))))....)))))).....))))))))))))..)..))).)).)))))))))))..))))))))))).))...	144	27.3	-48.5	1.2	0	0	0	0	0	0	0	8	0	10	0	0	14.5	8	0	4	0	0	0	0	0	0	0	4.97607	0	10.3986
19	22	col-miRn-5p-46619_106	GGAGCGGCTTGAGATCACATC	21	comp48901_c0	+	1	111	tgtggataggtctaacaGGAGCGACTTGAGATCACATCaaggtgcatttgatcttactgtatgcttgatgatgtgttctcaggtcgcccctgtaagacttcctttcactat	0						5'	New	gp4	.(((((.((((((.(((((.(((((((((((.(((((((....((((.............))))....))))))).))))))))))).))))).))))))...)))))...	107	44.1	-52.7	1.1	0	0	0	0	0	52	0	0	0	0	0	0	0	54	0	0	0	0	0	0	0	55.7446	0	0	0	0
20	23	col-miRn-5p-68355_69	AAAGGATTTGGAAAGGGAAAGGGA	24	pDNR_481_TRA_8546	+	498	672	aacacctaacgctgtttggtagggatttgggAAAGGATTTGGAAAGGGAAAGAGAagagataggtgaaataagaataaagtatacatatatttcatttagtttcacacactttttctctatctatttccaaatccttctacaaatctcctaacccaaacacagtatgaaaggtac	0						5'	New	gp4	...((((...(((((((((((((((((((((.(((((((((((((..((.(((((((((....(((((((..((((.((((((....)))))).)))).)))))))....))))))))).))..))))))))))))))).)))))).))))..))))..))))).....))))..	170	34.3	-63.6	1.1	0	0	0	0	0	0	49.5	4	0	0	0	0	15	17.5	20	0	0	0	0	0	0	0	30.8395	2.48804	0	0
21	24	col-miRn-5p-21064_221	ACAGAATGAGACACAGATGTGAGA	24	comp67853_c0	+	2358	2477	cagttaggagcacagaagattttcACAGAATGAGACACAGATGTGAGAcaaaggtgtagaatccatcttttgtttcacatctatgtcccattttgtgaaaatctcttgtgcacttagatt	0						5'	New	gp4	...(((((.(((((..((((((((((((((((.((((.((((((((((((((((((.......)))).)))))))))))))).)))).))))))))))))))))..))))).)))))...	114	37.5	-62	1.4	10	25	0	41	15	33	20	0	11	35	13	0	32	19	0	10	13.3669	45.4414	0	41.7387	11.2133	35.3764	12.4604	0	11.3451	36.3951
22	25	col-miRn-3p-163119_21	CTTAACATGTGTCCTAAGGGCACA	24	comp61871_c0	-	704	840	ttattgatgtgctcccttagggcacatgttaaaaaagcttagaagtgttgtacattgcacatgagagtgagtgcaataaataaggtacaatacttttaagctctCTTAACATATGTCCTAAGGGCACAtattaacaa	0						3'	New	gp4	...((((((((..(((((((((((.(((((((...(((((((((((((((((((((((((((....))..))))))).......))))))))))))))))))...))))))).)))))))))))..))))))))...	131	35	-64.2	1.3	0	0	0	0	0	0	0	0	0	0	0	21	0	0	0	0	0	0	0	0	0	0	0	0	0	0
23	26	col-miRn-5p-17637_256	GGGATTGGTGGCTTGAAAAGC	21	LJSB229F	-	536	698	ttgggaagtgatgagaaacgggggatgaatatttgccgaaaatctttgGGGATTGGTGGCTTGGAAAGCtttgttcttttctcttttgaatgaatttaatggctttccaagtccaccccttcctattgttttcggtcttctctctcccttttcttctttcgct	0						5'	New	gp4	......(((((.((((((.((((((.((......(((((((((...((((((..((((((((((((((((..((((..(((......))).)))).....))))))))))).)))))..))))))..)))))))))....)))))))).))))))...)))))	157	41.7	-67.7	1	21	43	27	81	0	104	23	0	0	0	0	0	0	116	0	0	28.0704	78.1592	43.9538	82.4595	0	111.489	14.3295	0	0	0
24	27	col-miRn-5p-315953_8	AGAATCTTTCATGATCATCTTCAT	24	comp592308_c0	-	65	203	ggAGAATCTTTCATGATCATCTTCATgacatttttttcatgatccctataaatctaacacaataaatgagtattattttgtatggcaaagctaggaatcatgaaaaaatcttcatgaaaatgaccatgaatgatttatg	0						5'	New	gp4	...(((((.((((((.((((.(((((((...((((((((((((.((((.....((((((.(((((.......))))).))).)))......)))).))))))))))))...))))))).)))).)))))).)))))...	133	28.8	-43.7	1.1	0	0	0	8	0	0	0	0	0	0	0	8	0	0	0	0	0	0	0	8.14415	0	0	0	0	0	0
25	28	col-miRn-3p-54304_90	AGTAATGCTTGGATCATGAGAAA	23	comp51602_c0	+	460	579	aaaaatcttcatgatgcatttcatgatatttttttcatgatccctagtattattctttcttgtaagAGTAATGCTTGGATCATGGGAAAaatatcatgaagatgatcataaaagattctc	0						3'	New	gp4	...((((((.(((((.(((((((((((((((((..((((((((..((((((((((((......)))))))))))).))))))))..))))))))))))).)))))))))..))))))...	114	28.3	-55.2	1.6	0	9	0	0	31	12	8	0	12	12	0	0	16	10	0	0	0	16.3589	0	0	23.1742	12.8641	4.98417	0	12.3764	12.4783
26	29	col-miRn-3p-150080_24	TGGAGGAGCTTGATCAAAACGGGAA	25	comp66857_c0	+	20	105	ataccctttttgatcaagcttactccatttttgaaatcaaaagaaagatactattaaaaaTGGAGGAGCTTGATCAAAACGGGAAc	0						3'	New	gp4	...(((.((((((((((((((.((((((((((((.(((........)))....)))))))))))))))))))))))))).)))...	80	32.6	-38.5	1.4	0	0	0	0	0	0	0	0	0	8	0	0	0	16	0	0	0	0	0	0	0	0	0	0	0	8.31887
27	30	col-miRn-5p-97475_44	AATTAGTGTACTAACTAGTGTACC	24	comp50579_c0	+	108	262	ttatatgtatcAATTAGTGTACTAACTAGTGTACTaataggtgatgcagtatcattttagaggttttgaatatttgtaacgtgtataataaatatggtcagtaataatgtcataatattagttggtacactagttagtatattaattggtgcatg	0						5'	New	gp4	...(((((((((((((((((((((((((((((((((((..((((((...)))))).......(((.(((....(((...(((((.......)))))..)))........))).)))....)))))))))))))))))))))))))))))))))))	152	27.1	-53.3	1.3	0	0	0	0	0	0	0	0	8	8	0	38	0	0	0	0	0	0	0	0	0	0	0	0	8.25095	8.31887
28	31	col-miRn-3p-99527_43	AGCTTTCTTAACATGTGCCCTAAG	24	comp61871_c0	+	777	962	tggcttcttttgtatataggtcttgttaatatgtgcccttaggacatatgttaagagagcttaaaagtattgtaccttatttattgcactcactctcatgtgcaatgtacaacacttctaAGCTTTTTTAACATGTGCCCTAAGggagcacatcaataaattcctttgtatataatgtgaagtgtc	0						3'	New	gp4	..(((((..(((((((((((..(((((.((.((..((((((((.(((((((((((((((((((.((((.((((((.......(((((((..........))))))))))))).)))).))))))))))))))))))).))))))))..)).)).)))))...)))..))))))))...)))))...	181	34.4	-74.8	1.2	0	0	0	0	15	0	0	8	10	10	0	0	0	0	0	0	0	0	0	0	11.2133	0	0	4.97607	10.3137	10.3986
29	32	col-miRn-3p-3803_812	TACGGGTTCATAGATGAGGAG	21	comp56423_c0	+	607	747	ctcatttatcaacctgtatatttgaatctttcaactataaaagtgtataatttttactcgctgtataccccttccaagaaggttgtttttatacaatttttatagttgaggggtaatacgTACGGGTTCATAGATGAGGAG	0						3'	New	gp4	(((((((((.(((((((((......(((..((((((((((((((((((((....(((.....)))....(((((...)))))......)))))).))))))))))))))..))).....))))))))).)))))))))...	138	32.6	-50	1.1	15	16	14	53	16	82	39	22	52	112	48	9	209	61	12	52	20.0503	29.0825	22.7909	53.955	11.9609	87.9049	24.2978	13.6842	53.6312	116.464
30	33	col-miRn-3p-18137_250	AAATCTCAACCACACAATGCACCA	24	comp29957_c0	+	43	194	atcctccatagtgattttttcttaaagtttcttaaagtcgtgtATTGTGTGGTTGAGATTTAATACTaaaaaattaatgtgacttgtcattAAATCTCAATCACACAATGCACCActctaagaaactttaggaaaaaaaaactctagagatc	0						3'	New	gp4	...(((...(((..((((((((((((((((((((.(((.(((((((((((((((((((((((((((...................)).))))))))))))))))))))))))).))).))))))))))))))))))))..)))...)))...	146	29.6	-66.9	1.5	20	14	25	28	57	32	41	37	45	62	88	73	50	27	49	67	26.7338	25.4472	40.698	28.5045	42.6106	34.3044	25.5439	23.0143	46.4116	64.4712
31	34	col-miRn-3p-91142_48	TGTTAGTGAGAGTGGTAGTGTCCC	24	ZDSB562F	-	26	157	acaacaatgtttggaacactaacactcttattaacaatcttactaatatactcacaagcttggtatgagacccacacaaacttgtgagtgttgatTGTTAGTGAGAGTGGTAGTGTCCCtaacatttgtcat	0						3'	New	gp4	...((((((((.((.((((((.(((((((((((((((((........(((((((((((.(((...((.....))..))).))))))))))).))))))))))))))))).)))))).)).)))))).))...	126	36.4	-54.3	1.1	0	0	0	0	11	0	0	0	0	0	0	0	23	0	0	14	0	0	0	0	8.2231	0	0	0	0	0
32	35	col-miRn-3p-63944_75	ATACAAATGTGAGTGGATGAAAGG	24	comp753763_c0	-	53	145	tcatttcattcacttatatttgtattcattttaatattttaaatcacaattatcatttgtttttgtagATACAAATGTGAGTGGATGAAAGGg	0						3'	New	gp4	...(((((((((((((((((((((((...(((((....)))))..((((.......)))).......)))))))))))))))))))))))...	87	23.7	-28.4	1.3	0	30	0	0	8	16	20	10	13	27	15	0	17	0	0	0	0	54.5297	0	0	5.98044	17.1522	12.4604	6.22009	13.4078	28.0762
33	36	col-miRn-5p-209933_13	TGGACCACAACATATAGTAGC	21	comp399414_c0	+	9	197	aaattgggcaactccaggtgatgtgagacacattctaacacactttccTGAACCACAACATATAGTAGCtaaataaacggcacaccaatcacaggctcaaccaattggtgtgccgtttgtctggttactgtatgttgtggtccaggagagtgtgttggaatgtgtatcacatcgcttcaagctgcccaa	0						5'	New	gp4	...(((((((.((..(((((((((((.(((((((((((((((((((((((.((((((((((((((((((((.(((((((((((((((((....((.....)).))))))))))))))))).)))))))))))))))))))).))))))))))))))))))))))).)))))))))))..)).)))))))	186	45	-129.7	1.5	0	0	0	0	0	0	0	0	0	16	0	0	13	0	0	0	0	0	0	0	0	0	0	0	0	16.6377
34	37	col-miRn-3p-130934_29	GATTTGATCATGTAGTTATCGATA	24	3E6_A661_TRA_2128	+	242	431	aatcgtctagtatttatatgaatataaaaaattacggtaatcggatattgatagttatatgatcagatttattttttttaatagttaattataacatcattaatttttttatataaaattGATTTGATTATGTAGTTATCGATAtttgattaatttgatttttttattaacatatagtatttgacgagtt	0						3'	New	gp4	..(((((.((((.(((((((((((.(((((((((...(((((..(((((((((..(((((((((((((..(((((...(((.(((((((.........)))))))...)))...)))))..)))))))))))))..)))))))))..)))))...)))))))))))))..))))))))))).)))))...	185	17.4	-53.1	1.6	10	0	0	0	0	0	0	0	8	0	0	11	0	0	0	0	13.3669	0	0	0	0	0	0	0	8.25095	0
35	38	col-miRn-3p-171362_19	ATCAATGGTTGAGATCTAAAAGGG	24	comp54308_c0	+	75	226	tcagacccctttatttttggacctccacaaccccttttaaatctcaatcattgatggtgtgggccgcatatatacatgagtgggtctcacatatacATCAATGGTTGAGATCTAAAAGGGattgtgggtattccaaaaaaaaggaagtccca	0						3'	New	gp4	...(((.(((((.((((((((..(((((((.((((((((.(((((((((((((((((((((((((.(((..........))))))).)))))...)))))))))))))))).)))))))).)))))))...)))))))))))))..)))...	146	40.8	-70.9	1.1	0	0	0	9	0	0	0	0	8	11	12	0	0	0	0	0	0	0	0	9.16216	0	0	0	0	8.25095	11.4384
36	39	col-miRn-3p-9080_426	AAATCTCCCAACCAAACACAGCGT	24	comp39620_c0	-	40	155	caggatattctaacgctgtttggttggggcatttgagaaggatttgaaagagaaaaggtaggtgaaatgtgtatttttttcAAATCTCCCAACCAAATACAGCGTaaaaaatcaat	0						3'	New	gp4	...(((.((...((((((((((((((((..(((((((((..((.............................))..)))))))))..)))))))))..)))))))..)).)))...	110	35.3	-35	0.9	21	16	23	35.5	58	42.5	76	14	32	56	69	9	27	25	50	25	28.0704	29.0825	37.4421	36.1396	43.3582	45.5605	47.3496	8.70813	33.0038	58.2321
37	40	col-miRn-3p-116669_34	GGTCCTGCTCTGGCAGCCTCACT	23	comp53140_c0	+	128	264	gaggggaataagtgaagctgccagcatgatctagccttggttagtcttagagagggaaagagtataagtatgagggagaagagaggagaaactaaccctagctaGGTCATGCTCTGGCAGCCTCACTccttcccttt	0						3'	New	gp4	((((((((..(((((.(((((((((((((((((((...((((((((((.............(((....)))..............))))..))))))...)))))))))))))..)))))).)))))..))))))))	137	48.2	-59.8	0.9	0	0	16	0	0	0	18	0	0	0	0	0	0	0	0	0	0	0	26.0467	0	0	0	11.2144	0	0	0
[truncated: 7 more columns]
