# Supplementary material for: Identification of miRNA–mRNA Regulatory Modules Involved in Lipid Metabolism and Seed Development in a Woody Oil Tree (Camellia oleifera)
Source: Cells. 2021 Dec 27;11(1):71. doi: 10.3390/cells11010071 (PMC8750442; doi:10.3390/cells11010071)
Supplement: Supplementary file 1 [file cells-11-00071-s001.zip › Table S7.xlsx]

## Sheet: Sheet1
Table S7. Length distributions of unique miRNAs.
Length	Unique miRNA	%
18	5	2.25
19	6	2.7
20	14	6.31
21	110	49.55
22	30	13.51
23	10	4.5
24	42	18.92
25	5	2.25
All	222	100
