# Supplementary material for: Identification of miRNA–mRNA Regulatory Modules Involved in Lipid Metabolism and Seed Development in a Woody Oil Tree (Camellia oleifera)
Source: Cells. 2021 Dec 27;11(1):71. doi: 10.3390/cells11010071 (PMC8750442; doi:10.3390/cells11010071)
Supplement: Supplementary file 1 [file cells-11-00071-s001.zip › Table S8.xlsx]

## Sheet: Sheet1
Table S8. Known miRNAs in developing seeds of tea oil camellia in this study.
miRNA-Index	miRNA name	miRNA-seq	length	Expression level		pre-miRNA-seq
1	mes-miR156a	TGACAGAAGAGAGTGAGCAC	20	highly		aaacTGACAGAAGAGAGTGAGCACacagaggctaattggtataagtctatgccattgcttttgcgtgctcacttctcttctgtca
2	rco-miR156e_L+1R-1	TTGACAGAAGAGAGAGAGCAC	21	highly		aatgTTGACAGAAGAGAGAGAGCACaacccgccatcagctaaagaaaatctttacgtgttgtgggagtgtgccctttcttcttctgtcatcatc
3	rco-miR167a_R+1	TGAAGCTGCCAGCATGATCTAA	22	highly		cgtgcaccactttcagtTGAAGCTGCCAGCATGATCTAAacatacctcctttgttgaggacagattAGATCGTGTGGTAGCTTCACCtgttgttggtgtcacgaa
4	mdm-MIR167c-p3_1ss6AG	AGATCGTGTGGTAGCTTCACC	21	highly		cgtgcaccactttcagtTGAAGCTGCCAGCATGATCTAAacatacctcctttgttgaggacagattAGATCGTGTGGTAGCTTCACCtgttgttggtgtcacgaa
5	rco-miR171c	TGATTGAGCCGTGCCAATATC	21	highly		tgatgttggaatggctcaatcaaatcaaatctcccaagggcatgggtcctttagttTGATTGAGCCGTGCCAATATC
6	peu-MIR2916-p5_1ss5AG	TACCGTCCTAGTCTCAACCATA	22	highly		tgggggctcgaagacgatcagaTACCGTCCTAGTCTCAACCATAaaCGATGCCGACCAGGGATTGGCGGAtgttgcttttaggactccgcca
7	peu-MIR2916-p3_2ss18TC19GA	CGATGCCGACCAGGGATCAGCGGA	24	highly		tgggggctcgaagacgatcagaTACCGTCCTAGTCTCAACCATAaaCGATGCCGACCAGGGATTGGCGGAtgttgcttttaggactccgcca
1	ama-miR156_L+5R-2	AAAAACTGACAGAAGAGAGTGAGC	24	low		ctctgcttgaAAAAACTGACAGAAGAGAGTGAGCacacagaggctaattggtataagtctatgccattgcttttgcgtGCTCACTTCTCTTCTGTCATTTtgctctctcccggaatt
2	lus-MIR156a-p3_1ss21CT	GCTCACTTCTCTTCTGTCATTT	22	low		ctctgcttgaAAAAACTGACAGAAGAGAGTGAGCacacagaggctaattggtataagtctatgccattgcttttgcgtGCTCACTTCTCTTCTGTCATTTtgctctctcccggaatt
3	mtr-miR156h-3p_1ss8AC	GCTCTTTCTTCTTCTGTCATC	21	highly		gagggtgaataagagagatgggtttcgagagaaatgttgacagaagagagagagcacaacccgccatcagctaaagaaaatctttacgtgttgtgggagtgtGCCCTTTCTTCTTCTGTCATCatctttgaaactctgtctcaacatttgatcaccacc
4	aly-miR166g-5p_2ss10TG20GT	GGAATGTTGGTTGGCTCGATG	21	low		tttgtgtatggaagtatttgaggGGAATGTTGGTTGGCTCGATGtcttcacaagaattgtcggacaaaagggttcgatcaacaagtgaagataTCGGACCAGGCTTCATTCCTCtcaaaataagtccatcatcac
5	hpe-miR166a	TCGGACCAGGCTTCATTCCCC	21	highly		tttgtgtatggaagtatttgaggGGAATGTTGGTTGGCTCGATGtcttcacaagaattgtcggacaaaagggttcgatcaacaagtgaagataTCGGACCAGGCTTCATTCCTCtcaaaataagtccatcatcac
6	dpr-miR167a_R+1	TGAAGCTGCCAGCATGATCTAG	22	highly		agtctggaggggaataagTGAAGCTGCCAGCATGATCTAGccttggttagtcttagagagggaaagagtataagtatgagggagaagagaggagaaactaaccctagctaGGTCATGCTCTGGCAGCCTCACTccttccctttgggga
7	aly-miR167b-3p_1ss13AG	GGTCATGCTCTGGCAGCCTCACT	23	low		agtctggaggggaataagTGAAGCTGCCAGCATGATCTAGccttggttagtcttagagagggaaagagtataagtatgagggagaagagaggagaaactaaccctagctaGGTCATGCTCTGGCAGCCTCACTccttccctttgggga
8	ccl-miR167a	TGAAGCTGCCAGCATGATCTGA	22	low		ttatcgtgcaccactttcagtTGAAGCTGCCAGCATGATCTAAacatacctcctttgttgaggacagATTAGATCGTGTGGTAGCTTCACCtgttgttggtgtcacgaaaa
9	nta-MIR167d-p3_1ss9AG	ATTAGATCGTGTGGTAGCTTCACC	24	low		ttatcgtgcaccactttcagtTGAAGCTGCCAGCATGATCTAAacatacctcctttgttgaggacagATTAGATCGTGTGGTAGCTTCACCtgttgttggtgtcacgaaaa
10	vun-miR169	CAGCCAAGGATGACTTGCCGG	21	low		tcaccaagagggtcttacttgaggaggtagagagtttgatgCAGCCAAGGATGACTTGCCGGcccaacagcaccagtgtgggagatgggtactttccGGCAAGTTGTCTTTGGCTACAtgagtctctctttctctcaagtaagaccttaatggcat
11	aly-miR169b-3p_2ss12C-15CT	GGCAAGTTGTCTTTGGCTACA	21	low		tcaccaagagggtcttacttgaggaggtagagagtttgatgCAGCCAAGGATGACTTGCCGGcccaacagcaccagtgtgggagatgggtactttccGGCAAGTTGTCTTTGGCTACAtgagtctctctttctctcaagtaagaccttaatggcat
12	crt-miR171_R+2	TGATTGAGCCGTGCCAATATCCA	23	low		tgatgatgttggaatggctcaatcaaatcaaatctcccaagggcatgggtcctttagttTGATTGAGCCGTGCCAATATCAAag
13	mdm-MIR391-p5_2ss16CT20GA	ACGCAGGAGAGATGATGCCAA	21	low		ggaagacgatgatgatttcctgcattgaaaggtttgccACGCAGGAGAGATGATGCCAActtacaagccatttttagaatgagatggctggtgcgttggcatcattgatcctgcgtagcaaacctttgcaagtgcgctaaaaaaaaatccattcttga
14	ama-miR396-5p_1ss21TG	TTCCACAGCTTTCTTGAACTG	21	highly		gatgatcctctttgtattcTTCCACAGCTTTCTTGAACTGcatccgatcgcatcatcctcactcttgcaaatttaggtatcaaaaggccgttcaatcgttgcaGTTCAATAAAGCTGTGGGAAGatacagagagggtcaaa
15	cca-miR396a-3p_2ss7GT21AG	GTTCAATAAAGCTGTGGGAAG	21	low		gatgatcctctttgtattcTTCCACAGCTTTCTTGAACTGcatccgatcgcatcatcctcactcttgcaaatttaggtatcaaaaggccgttcaatcgttgcaGTTCAATAAAGCTGTGGGAAGatacagagagggtcaaa
16	ama-miR396-5p	TTCCACAGCTTTCTTGAACTT	21	low		ttaagagaattctgtgcaagtcctgccatgcttTTCCACAGCTTTCTTGAACTTccatatctattgttcttaattttgttttctagaaatagatcaactgtggaaGCTCAAGAAAGCTGTGGGAAGacatggcagttcaggacttctttgcc
17	ama-miR396-3p_L-2R+2	GCTCAAGAAAGCTGTGGGAAG	21	low		ttaagagaattctgtgcaagtcctgccatgcttTTCCACAGCTTTCTTGAACTTccatatctattgttcttaattttgttttctagaaatagatcaactgtggaaGCTCAAGAAAGCTGTGGGAAGacatggcagttcaggacttctttgcc
18	amg-miR396	TTCCACAGCTTTCTTGAACTG	21	highly		aaatgaccctctttgtatttTTCCACAGCTTTCTTGAACTGcattagtgaaatcttaatttttttatgattcaattgttgcggttcagtgaagctgtggaaagatatagatagggtcaagc
19	hbr-miR398_2ss9CT21GC	GGAGCGACTTGAGATCACATC	21	low		tgtggataggtctaacaGGAGCGACTTGAGATCACATCaaggtgcatttgatcttactgtatgcttgatgaTGTGTTCTCAGGTCGCCCCTGtaagacttcctttcactat
20	aqc-MIR398b-p3_1ss11GA	TGTGTTCTCAAGTCGCCCCTG	21	low		tgtggataggtctaacaGGAGCGACTTGAGATCACATCaaggtgcatttgatcttactgtatgcttgatgaTGTGTTCTCAGGTCGCCCCTGtaagacttcctttcactat
21	stu-miR482a-5p_2ss3AG12AC	GGGATTGGTGGCTTGGAAAGC	21	highly		ttgggaagtgatgagaaacgggggatgaatatttgccgaaaatctttgGGGATTGGTGGCTTGGAAAGCtttgttcttttctcttttgaatgaatttaatggcTTTCCAAGTCCACCCCTTCCTAttgttttcggtcttctctctcccttttcttctttcgcttcttca
22	sly-miR482a_1ss8TG	TTTCCAAGTCCACCCATTCCTA	22	highly		ttgggaagtgatgagaaacgggggatgaatatttgccgaaaatctttgGGGATTGGTGGCTTGGAAAGCtttgttcttttctcttttgaatgaatttaatggcTTTCCAAGTCCACCCCTTCCTAttgttttcggtcttctctctcccttttcttctttcgcttcttca
23	gso-miR482a_R+1_2ss5CA10CG	TCTTACCTAGACCTCCCATACC	22	low		tgggaaagagggaaagagagatagatatggaggaagttgtgggtatggggggtttggcatgataaagtttttgagttttgatttgataaaaatctcaaaaaaacaaaaaacaaaTCTTGCCTAGACCTCCCATACCaatgatttccttctatcctccccttcccttccttttcctta
24	ptc-MIR482d-p3_2ss12AG21CT	CCACCCATGCCGATGATTTCTT	22	low		aaaaaattacatgtagatagagagaggaataagagggaaagggaggcagatctgcacgaagttattggcagggtgatcctgggaaagaaagagttgtgttttagatcttttccaagaCCACCCATGCCGATGATTTCTTgcagatcctccctttccctaacttgtcctatttagatctaatcttaatttatg
25	ath-MIR5645e-p3_1ss18TA	AAAACGACGTCGTTTTGAGT	20	low		tttggtacctcaaaattttgtgacttaaatggctcaaatttatcaaaacgacgtcgttttacgctcatttatactcAAAACGACGTCGTTTTGAGTgatttgagccatttgaaccacaaaattttgagatacctaa
26	nta-MIR6149a-p5_2ss18CT21TA	ATACGCACCTGAATCGGTAGA	21	low		atcctaagttcattttgtgcgtcaaagcttgcATACGCACCTGAATCGGTAGAtagagaaaaagatcaacaactctatttatgttactctttatatgtgccgatttgggttcgtatgcatgccatggcgtactgaaaaaccaacttagaag
1	han-miR156a_L+1	ATGACAGAAGAGAGTGAGCAC	21	low		atatgttcgggggttgagtcatcggaattccagatgaatgactcgaagaattctgtgattgagATGACAGAAGAGAGAGAGCACgaccagagtctgaaatccctgatagcccttgaacagtt
1	han-miR156a_L+1	ATGACAGAAGAGAGTGAGCAC	21	low		caatctcccgagtttcagctggcggcgctgATGACAGAAGAGAGAGAGCAC
2	mtr-miR156a_L+1R-1_1ss4AC	ATGCCAGAAGAGAGAGAGCAC	21	low		tgATGACAGAAGAGAGAGAGCACgccctgtcggtaatgtcaggt
3	bcy-miR156_L-1	TTGACAGAAGATAGAGAGCAC	21	low		cccagggttgatTTGACAGAAGAGAGAGAGCACagccagagtcagtgacaccggtgaaacattctcccggaggaatggtggaaccggaatagctggacccacttgctgagccatgcagaaaaaggtttgacggaggattttcagattcgctct
3	bcy-miR156_L-1	TTGACAGAAGATAGAGAGCAC	21	low		catggatcatgggctgaggcatggtcgtaagatttacatgaatggggtggtcgagtgcaatgtttgctggctctgagccccaagaattggTTGACAGAAGAGAGAGAGCACgatgatctggc
4	hbr-MIR159b-p5_1ss10GT	AGCTGCTGATCTATGGATCCC	21	highly		gAGCTGCTGATCTATGGATCCCtcagttctatccatccatttctttgaaagtggataggcttgtggcttccatatgtcaggagctgcattacctaagttagatccttgTTTGGATTGAAGGGAGCTCTAcaccacacctctctctcagtatt
5	pvu-miR159a.1	TTTGGATTGAAGGGAGCTCTA	21	highly		gAGCTGCTGATCTATGGATCCCtcagttctatccatccatttctttgaaagtggataggcttgtggcttccatatgtcaggagctgcattacctaagttagatccttgTTTGGATTGAAGGGAGCTCTAcaccacacctctctctcagtatt
6	hbr-MIR159b-p3_1ss20GA	AGCTCCTTGAAGTCCAATAAA	21	low		aagcagatagttatgtttgtgtgggtttagggtttgtggtattctgaaattagggttttggagtggAGCTCCTTGAAGTCCAATAAAaggaacttactg
7	htu-miR160a_R+1	TGCCTGGCTCCCTGTATGCCA	21	highly		gaaagggggcgaaaacagacttgaatggagtttattgaggtggaaatctgataaagatataccatattgagcgTGCCTGGCTCCCTGCATGCCA
8	hpe-miR162a_L-2	GATAAACCTCTGCATCCAG	19	low		tcagcctgttgcagctgttcggtgaaggtcttgagtgccggactatcgaaacgagcataaagcagatcttccggggcgaagttttgcagattccagtGATAAACCTCTACATCCAGgccat
8	hpe-miR162a_L-2	GATAAACCTCTGCATCCAG	19	low		tcagcctgttgcagctgttcggtgaaggtcttgagtgccggactatcgaaacgagcataaagcagatcttccggggcgaagttttgcagattccagtGATAAACCTCTACATCCAGgccat
9	ctr-miR164_R-1	TGGAGAAGCAGGGCACGTGC	20	low		tggttgacatgtttgggtccatgtgggtgaggtgagaaaaagtaggggtggtttggtttggggtgaaaaTGGAGAAGCAGGGCACTTGCtcatagtcatgatactcatttgtattggtttggtcaaagg
10	csi-miR166e-5p	GGAATGTTGTCTGGCTCGAGG	21	highly		gGGAATGTTGTCTGGCTCGAGGaccctttcttgatcaatttctatcacagatctgtatatctatagatctgtatgtatttatacatatatgaaagattgtttgatcatgtgttagtgttgTCGGACCAGGCTTCATTCCCCccaatt
11	hpe-miR166a_1ss5AC	TCGGCCCAGGCTTCATTCCCC	21	highly		gGGAATGTTGTCTGGCTCGAGGaccctttcttgatcaatttctatcacagatctgtatatctatagatctgtatgtatttatacatatatgaaagattgtttgatcatgtgttagtgttgTCGGACCAGGCTTCATTCCCCccaatt
12	dpr-miR167a_L-2R+3	AAGCTGCCAGCATGATCTAGTG	22	low		gatgtgttggtttgagagcttgAAGCTGCCAGCATGATCTAGTG
13	crt-miR168_L-2	GCTTGGTGCAGGTCGGGAA	19	low		GCTTGGTGCAGGTCGGGAActacttcgccggcggcggcgattgattctgattgattcgggggcgaatcgggtCCCGCCTTGCATCAACTGAATc
14	sly-miR168b-3p	CCCGCCTTGCATCAACTGAAT	21	highly		GCTTGGTGCAGGTCGGGAActacttcgccggcggcggcgattgattctgattgattcgggggcgaatcgggtCCCGCCTTGCATCAACTGAATc
13	crt-miR168_L-2	GCTTGGTGCAGGTCGGGAA	19	low		GCTTGGTGCAGCTCGGGAActggtggtctagaaggcccaccagcagaaggtacaaccccaaggccaccacccacaccactactgctgctgccaccacgc
15	aqc-miR169c_R+1_1ss20GA	CAGCCAAGGATGACTTGCCAGA	22	low		aagtggtgCAGCCAAGGATGACTTGCCAGAa
16	ccl-miR171	TGATTGAGCCGCGCCAATATC	21	low		gTGATTGAGCCGCGCCAATATCTCTt
17	ssl-miR171b_2ss11CT19AT	TTGAGCCGCGTCAATATCTCT	21	low		gTGATTGAGCCGCGCCAATATCTCTt
16	ccl-miR171	TGATTGAGCCGCGCCAATATC	21	low		cacgggtgatcgcaactgttgtTGATTGAGCCGCGCCAAAATC
18	ssl-miR171b	TTGAGCCGCGCCAATATCACT	21	low		ggaTTGAGCCGCGCCAATATTACTttttagtctgtttgttacatgagttgttcctgataaaagtagtgtttggtgtttt
19	lja-miR171d-3p	CGATGTTGGTGAGGTTCAATC	21	low		gaagaggggactgctcaaCGTTGTTGGTGAGGTTCAATCgaa
20	csi-miR172c_L-1_1ss6TA	GGAAACTTGATGATGCTGCAG	21	low		acgttttggaaTGAAACTTGATGATGCTGCAGaaagccttggtgttagtcgatctacattgaaacgtgtctgccgggaatataatatatcatggtggtcacctagcaagagaaccaaggataacggctctctttccaaaaaaa
21	aqc-miR172b_1ss21TG	GGAATCTTGATGATGCTGCAG	21	highly		cgaagtagtggtggaagtggaaggagGGAATCCTGATGATGCTGCAGcggagaacagtgccaccgggctatccacactttggttctgcattttccatgcccagtttgggaatgccggtgaaggaatggcttcagtcaccttccctagtgctctt
21	aqc-miR172b_1ss21TG	GGAATCTTGATGATGCTGCAG	21	highly		gagaactgctgtgGGAATCCTGATGATGCTGCAGcagttgca
22	aqc-MIR172b-p3_1ss9TC	TGGGAATCCTGATGATGCTGC	21	low		gaaagcagcagtggtagtagctgcagaTGAGAATCCTGATGATGCTGCcgtagagactgttgttggg
23	htu-miR393a_R-1_1ss21CT	TCCAAAGGGATCGCATTGATT	21	low		aacaTCCAAAGGGATCGCATTGTTT
23	htu-miR393a_R-1_1ss21CT	TCCAAAGGGATCGCATTGATT	21	low		gacaTCCAAAGGGATCGCATTGTTT
24	ssl-miR394	TTGGCATTCTGTCCACCTCC	20	highly		gttggtttaacaaagtgtttcttacagagtttaTTGGCATTCTGTCCACCTCCctcctctcagaaaaaaagcccgtatttctctctaaaatggaatggaggtgggcatactgccaactgagctctgttagtttctctttgTAAAACCCTCTTGATAGATAT
25	aly-MIR394a-p3_2ss16CA17TG	TAAAACCCTCTTGATAGATAT	21	low		gttggtttaacaaagtgtttcttacagagtttaTTGGCATTCTGTCCACCTCCctcctctcagaaaaaaagcccgtatttctctctaaaatggaatggaggtgggcatactgccaactgagctctgttagtttctctttgTAAAACCCTCTTGATAGATAT
24	ssl-miR394	TTGGCATTCTGTCCACCTCC	20	highly		aacgacaacatgagtaaacctttgttacccaagcaagtcattcgaacgtgctttccgtaaaactccaagcaccatatgtTTGGCATTCTGTCAACCTCC
26	ssl-miR397_1ss2CA	TAATTGAGTGCAGCGTTGATG	21	low		atatcagtgactattagaatagtataactagtatcaacggcaacaacagtcttgttgtggtttgctatcttgaaaaagaactggTTATTGAGTGCAGCGTTGATG
27	bol-miR398a-3p	TGTGTTCTCAGGTCACCCCTT	21	highly		ctgaagcataccccagaggtgtgaacatgagaacacacactgtgattttgggtttggttgcttttaaatctcagtctcttcctctttttctttctctttctctttctcaatatcacaatgTGTGTTCTCAGGTCACCCCTTtggggcacttctgt
28	aqc-miR399	TGCCAAAGGAGAGTTGCCCTA	21	low		caataagcgaaccagttatagggcaacactccaacggcagctgttcctagtctttgggacgatcagtTGCCAAGGGAGAGTTGCCCTAcaattgcttcagcttaata
29	rco-MIR403a-p5_1ss2TG	CGAGTTTGTGTGTGAATCTAA	21	low		CGAGTTTGTGTGTGAATCTAAtggaatttcatttcatctttgagcagacactttagttcacgactccataccacaggggttcttgtcttcatgttgtctgagaatcattta
30	rco-MIR403a-p3_1ss2TG	CGAGTTTGTGTGTGAATCTAA	21	low		gaacgcaattcaacctcctttcctaagcaaccagtaaaCGAGTTTGTGTGTGAATCTAA
31	dpr-miR408_L-1	TGCACTGCCTCTTCCCTGGC	20	low		atcaggcacagcaccaccgccgccgccgccaccacTGCACTGCCTCTTCCCTGGG
32	aly-MIR472-p3_2ss6TG18AG	TTTCCGACTCCGCCCATGCCAT	22	highly		ttggagaaagcggaaagggagcaaaagagctttcggaatcttgcggtatgggcgaggcggtaagagagagttctctcgatgatcgattgagttctctcgatgatcgattgattgatactcTTTCCGACTCCGCCCATGCCATtggattccgattcctcctccctctcctcctccctcctct
33	mes-MIR477g-p5_1ss1CT	TCCTCAAAGGCTTCCAATATT	21	low		TCCTCAAAGGCCTCCAATATTgaaaccagcacatcttgccctttcttgcaggtcacc
34	vun-MIR482-p5_2ss17CT18TC	AAATTGTGGGAATGGGTCGATTGG	24	low		tagatgagagagagcgagtgaaaaaggagtaagagggagagggaaatagactaacaagAAATTGTGGGAATGGGTCGATTGGgaaggaattcttttggtgggtattgccaaacgaaatccTTTCCTAAACCACCCATTCCTCtgatttcttgatgtttttctctctccctttcttgtcctggtcctatatccagtcatccca
35	ppe-MIR482a-p3_3ss12TA21AT22AC	TTTCCGAAACCACCCATTCCTC	22	low		tagatgagagagagcgagtgaaaaaggagtaagagggagagggaaatagactaacaagAAATTGTGGGAATGGGTCGATTGGgaaggaattcttttggtgggtattgccaaacgaaatccTTTCCTAAACCACCCATTCCTCtgatttcttgatgtttttctctctccctttcttgtcctggtcctatatccagtcatccca
34	vun-MIR482-p5_2ss17CT18TC	AAATTGTGGGAATGGGTCGATTGG	24	low		cgggggagagagagcgagtgaaaaaggagtaagagggagagggaaatagactaacaagAAATTGTGGGAATGGGTCGATTGGgaaggaattcctttgggtattgccaaacgaaatcctttcctaaaccacccactcctctgatttcttgatgtttttctctctccctttcttgtcctggtcctatatccagtcatcccaat
35	ppe-MIR482a-p3_3ss12TA21AT22AC	TTTCCGAAACCACCCATTCCTC	22	low		agagggagggggaaatagactaacaagaaattgtgggaatgggtcgatgggaaggaattccttgggtattgccaaacgaaatccTTTCCTAAACCACCCATTCCTCtgatttcttgatgtttttctctctcccttt
36	gra-MIR482d-p3_2ss13CT17CT	TATATACACACATACATACACA	22	low		aaagttgtataTATATACACATATACATACACA
36	gra-MIR482d-p3_2ss13CT17CT	TATATACACACATACATACACA	22	low		ggttgaagattcaacgaattagggttcttTATATACACACATACACACACA
37	ppe-miR482c-3p_2ss9CG21AG	TTCCCAAGGCCGCCCATTCCGA	22	low		ttagaacttctgggagttataggaatggggttgccagggaagaaaataaagtcaattcgaggggttgatttgcaataaagagaaaggtatgggacttgagaactatattttatctttcTTCCCAAGGCCGCCCATTCCGAtgatttccagttgttcctc
38	mes-MIR482-p3_2ss9TG21AG	TTCCCTACGCCACCCATTCCGT	22	highly		gcaagaaattgtgggaatggagtgagtggggatggaaattccttttttattggtgggtaaaagatggatttattttctagggatccTTCCCTACGCCACCCATTCCGTtgatttcttggtt
39	ssl-miR828	TCTTGCTCAAATGAGTATTCCA	22	low		gtctttgagcctaattctcctcttgatccttcattttgtttctccatttgatttatttTCTTGCTCAAATGAGAATTCCA
39	ssl-miR828	TCTTGCTCAAATGAGTATTCCA	22	low		cttcactccgagctTCTTGCTCAAATGAGTGTTCCA
40	gma-MIR828a-p3_2ss3AC18CA	GCCTGAATATTGTGTGCA	18	low		aagcaggctaaaacttcGCCTGAATATTGTGTGCA
41	mtr-MIR2586a-p3_1ss15TC	CTATGAAGCACGGACACGGACACG	24	low		gatgtgttttgttggagttttctgaagtagtttttagtactcaaagTTATGAAGCACGGACACGGACACGggacacgg
42	mtr-MIR2586a-p3_1ss10TC	AAGCACGGACACGGACACGGACAC	24	low		caaccaacatatgcttttgcatattccctaagAAGCATGGACACGGACACGGACACg
43	mtr-MIR2586a-p5_1ss10TC	AAGCACGGACACGGACACGGACAC	24	low		ctatgAAGCACGGACACGGACACGGACACgaacacgcatacggacacggacacggacacggacacgggacacggtaat
44	mtr-MIR2586a-p5_2ss1CA22CG	ACGGACACGACACAGACACGCGGA	24	low		acACGGACACGACACAGACACGCGGAcacgcaatttttcaaaaaatgggggacacgacacgctg
45	mtr-MIR2586a-p3_2ss4TG21CT	CTAGGAAGCACGGATACGGATACG	24	low		ggcgtaaagtgtgaaaaaggaaaaattttgaattttttttttcctcctctgtttagcatgataaaCTAGGAAGCACGGATACGGATACG
46	mtr-MIR2592bj-p3_2ss12TC19AT_1	ATTCCCACTGTCCCTGTCT	19	low		tcagtgacgcgcatgaatggattaacgagATTCCCACTGTCCCTGTCTactatccagcgaaaccacagc
46	mtr-MIR2592bj-p3_2ss12TC19AT_1	ATTCCCACTGTCCCTGTCT	19	low		aagcgcgggtaaacggcgggagtaactatgactctcttaaggtagccaaatgcctcgtcatctaattagtgacgcgcatgaatggattaacgagATTCCCACTGTCCCTGTCTactatccagcgaaa
47	mtr-MIR2592bj-p3_2ss12TC19AT_2	ATTCCCACTGTCCCTGTCTA	20	low		ttagtgacgcgcatgaatggattaacgagATTCCCACTGTCCCTGTCTActatccagcgaaaccacagc
47	mtr-MIR2592bj-p3_2ss12TC19AT_2	ATTCCCACTGTCCCTGTCTA	20	low		aagcgcgggtaaacggcgggagtaactatgactctcttaaggtagccaaatgcctcgtcatctaattagtgacgcgcatgaatggattaacgagATTCCCACTGTCCCTGTCTActatccagcgaaa
48	gma-MIR4393b-p3_2ss9AG18AG	AAAACGACGTCGTTTTGGAGG	21	low		ttggaatccggatcctccgtcgcactctcctgcggcactgtcctgtcgccctccAAAACGACGTCGTTTTGGAGGgcgacagaaatgagctgcagcggagtgcaacggaggatccagattcaat
48	gma-MIR4393b-p3_2ss9AG18AG	AAAACGACGTCGTTTTGGAGG	21	low		attgaatctggatcctccgttgcactccgctgcagctcatttctgtcgccctccAAAACGACGTCGTTTTGGAGGgcgacaggacagtgccgcaggagagtgcgacggaggatccggattccaa
49	stu-MIR5303j-p5_2ss10GT17CT	ATTCAAATTTCTGCCCTA	18	low		cgacgcatcATTCAAATTTCTGCCCTAtcaactttcgatggtaggatagtggcctactatggtggtgacgggtgacggagaattagggttcgatt
49	stu-MIR5303j-p5_2ss10GT17CT	ATTCAAATTTCTGCCCTA	18	low		ATTCAAATTTCTGCCCTAtcaactttcgatggtaggatagtggcctactatggtggtgacgggtgacggagaatt
50	gma-MIR5368-p3_1ss16CT_3	AATTCTAACCTTGTGTCAGGACC	23	low		tttactgttccctgggattggctttgggcctttcctgcgcagcttaggtggagggcgaagaaggcccccttccgggggggcccgagccatcagtgagataccactctggaagagctagAATTCTAACCTTGTGTCAGGACCtacgggccaagggacagtctcaggtagacagtttc
50	gma-MIR5368-p3_1ss16CT_3	AATTCTAACCTTGTGTCAGGACC	23	low		tttactgttccctgggattggctttgggcctttcctgcgcagcttaggtggagggcgaagaaggcccccttccgggggggcccgagccatcagtgagataccactctggaagaaaaattAATTCTAACCTTGTGTCAGGACCtacgggccaagggacagtctcaggtagacagtttc
51	gma-MIR5368-p3_1ss16CT_1	AATTCTAACCTTGTGTCAGGA	21	low		tttactgttccctgggattggctttgggcctttcctgcgcagcttaggtggagggcgaagaaggcccccttccgggggggcccgagccatcagtgagataccactctggaagagctagAATTCTAACCTTGTGTCAGGAcctacgggccaagggacagtctcaggtagacagtttc
51	gma-MIR5368-p3_1ss16CT_1	AATTCTAACCTTGTGTCAGGA	21	low		tttactgttccctgggattggctttgggcctttcctgcgcagcttaggtggagggcgaagaaggcccccttccgggggggcccgagccatcagtgagataccactctggaagagctagAATTCTAACCTTGTGTCAGGAcctacgggccaagggacagtctcaggtagacagtttc
52	gma-MIR5368-p3_1ss4CA	GGAAGAGCTAGAATTCTAACCTTGT	25	low		gaccctatgaagctttactgttccctgggattggctttgggcctttcctgcgcagcttaggtggagggcgaagaaggcccccttccgggggggcccgagccatcagtgagataccactctGGAAGAGCTAGAATTCTAACCTTGTgtcagtacctacgggccaagggacagtctcaggtagacagtttctatggggcgt
52	gma-MIR5368-p3_1ss4CA	GGAAGAGCTAGAATTCTAACCTTGT	25	low		gaccctatgaagctttactgttccctgggattggctttgggcctttcctgcgcagcttaggtggagggcgaagaaggcccccttccgggggggcccgagccatcagtgagataccactctGGAAGAGCTAGAATTCTAACCTTGTgtcatgacctacgggccaagggacagtctcaggtagacagtttctatggggcgt
53	gma-MIR5368-p3_1ss17CT_1	GAATTCTAACCTTGTGTCAGGAC	23	low		tttactgttccctgggattggctttgggcctttcctgcgcagcttaggtggagggcgaagaaggcccccttccgggggggcccgagccatcagtgagataccactctggaagagctaGAATTCTAACCTTGTGTCAGGACctacgggccaagggacagtctcaggtagacagtttc
53	gma-MIR5368-p3_1ss17CT_1	GAATTCTAACCTTGTGTCAGGAC	23	low		tttactgttccctgggattggctttgggcctttcctgcgcagcttaggtggagggcgaagaaggcccccttccgggggggcccgagccatcagtgagataccactctggaagagctaGAATTCTAACCTTGTGTCAGGACctacgggccaagggacagtctcaggtagacagtttc
54	gma-MIR5368-p3_1ss17CT_2	GAATTCTAACCTTGTGTCAGGACC	24	low		tttactgttccctgggattggctttgggcctttcctgcgcagcttaggtggagggcgaagaaggcccccttccgggggggcccgagccatcagtgagataccactctggaagagctaGAATTCTAACCTTGTGTCAGGACCtacgggccaagggacagtctcaggtagacagtttc
54	gma-MIR5368-p3_1ss17CT_2	GAATTCTAACCTTGTGTCAGGACC	24	low		agctgtactgttccctgggattggctttgggcctttcctgcgcagcttaggtggagggcgaagaaggcccccttccgggggggcccgagccatcagtgagataccactctggaagagctaGAATTCTAACCTTGTGTCAGGACCtacgggccaagggacagtctcaggtagacagtttct
55	gma-MIR5368-p3_1ss21CT	GCTAGAATTCTAACCTTGTGT	21	low		tttactgttccctgggattggctttgggcctttcctgcgcagcttaggtggagggcgaagaaggcccccttccgggggggcccgagccatcagtgagataccactctggaagaGCTAGAATTCTAACCTTGTGTcaggacctacgggccaagggacagtctcaggtagacagtttc
56	gma-MIR5368-p3_1ss16CT_2	AATTCTAACCTTGTGTCAGGAC	22	low		tttactgttccctgggattggctttgggcctttcctgcgcagcttaggtggagggcgaagaaggcccccttccgggggggcccgagccatcagtgagataccactctggaagagctagAATTCTAACCTTGTGTCAGGACctacgggccaagggacagtctcaggtagacagtttc
57	gma-MIR5368-p3_1ss15CT	ATTCTAACCTTGTGTCAGGACC	22	low		ctttcctgcgcagcttaggtggagggcgaagaaggcccccttccgggggggcccgagccatcagtgagataccactctggaagagctagaATTCTAACCTTGTGTCAGGACCt
58	ath-MIR5645b-p5_2ss19TG21TC	CAAAACGACGTCGTTTTGGCC	21	low		tCAAAACGACGTCGTTTTGGCCATT
59	ath-MIR5645b-p3_2ss19TG22CA	CAAAACGACGTCGTTTTGGCTATT	24	low		tCAAAACGACGTCGTTTTGGCCATT
60	ath-MIR5645e-p3_2ss18TG20TG_2	AAAACGACGTCGTTTTGGGGC	21	low		agcgcctcAAAACGACGTCGTTTTGGGGCaac
60	ath-MIR5645e-p3_2ss18TG20TG_2	AAAACGACGTCGTTTTGGGGC	21	low		ttctgccccAAAACGACGTCGTTTTGGGGCatgg
61	ath-MIR5645b-p3_2ss18TG20TA	AAAACGACGTCGTTTTGGCAC	21	low		tgagtatcAAAACGACGTCGTTTTGACACatt
62	ath-MIR5645b-p3_2ss19TG21TC	CAAAACGACGTCGTTTTGGCC	21	low		gtactCAAAACGACGTCGTTTTAGCCa
63	ath-MIR5645b-p3_2ss18TA20TC	AAAACGACGTCGTTTTGACCC	21	low		atccAAAACGACGTCGTTTTGACCC
63	ath-MIR5645b-p3_2ss18TA20TC	AAAACGACGTCGTTTTGACCC	21	low		aacagggtcAAAACGACGTCGTTTTGACCCtcga
64	ath-MIR5645b-p5_2ss18TG20TA	AAAACGACGTCGTTTTGGCAC	21	low		aaatcaAAAACGACGTCGTTTTGGCTCgaataggcaaaacgacgtcgttttgcaaaattcgagccaaagtcgagccgggtttttcgagct
65	ath-MIR5645e-p3_2ss18TG20TG_1	AAAACGACGTCGTTTTGGGG	20	low		gtttggctctaccccAAAACGACGTCGTTTTGGGGtcgagccacgg
66	ath-MIR5645e-p5_2ss18TG20TG	AAAACGACGTCGTTTTGGGG	20	low		caaaaacaataatgcttagtagcccaaaaattcatgacttgaatgactcgaatgtgttAAAACGACGTCGTTTTGGGGataaaataacgtctttttaatatattcaagtcatttgggccatacaaatttaggccaccaagcatttttctttaaa
67	mdm-miR7122a_2ss4TA21CG	TTAAACAGAGAAATCACGGTGG	22	highly		aaggcggcaataacagttaaaaaatccataatctactcgattcaggtggcagtaacagttaaataactatactacctaaaatatatattttgTTAAACAGAGAAATCACGGTCGcata
68	ghr-MIR7499-p3_2ss10GC17CG	GGTTAATTCCGTTAACGAAC	20	low		taaggattgacagactgagagctctttcttgattctatgggtggtggtgcatggccgttcttagttggtggagcgatttgtctGGTTAATTCCGTTAACGAAC
68	ghr-MIR7499-p3_2ss10GC17CG	GGTTAATTCCGTTAACGAAC	20	low		gagcgatttgtctGGTTAATTCCGTTAACGAACgaga
1	ptc-miR156a_R+2	TGACAGAAGAGAGTGAGCACCA	22	low
2	stu-miR156f-3p_L+2R-1_4ss14TC15T-22AG23TC	TGCTCACTTCTCTCCTGTCAGC	22	highly
3	gma-miR159a-3p_L+3	ATCTTTGGATTGAAGGGAGCTCTA	24	low
4	vvi-miR160c_L+1R-1	ATGCCTGGCTCCCTGTATGCC	21	low
5	cpa-miR160c-3p	GCGTATGAGGAGCCATGCATA	21	low
6	csi-miR162-5p_L-1_1ss5GC	GGACGCAGCGGTTCATCGATC	21	low
7	tcc-miR162	TCGATAAACCTCTGCATCCAG	21	highly
8	cpa-miR164a	TGGAGAAGCAGGGCACGTGCA	21	highly
9	sly-miR164a-3p_2ss9TC12TC	CATGTGCCCGTCTTCCCCATC	21	low
10	cpa-miR164d	TGGAGAAGGGGAGCACGTGCA	21	low
11	csi-miR166e-5p_L-1R+1_1ss21GA	GAATGTTGTCTGGCTCGAGAT	21	low
12	lja-miR167_R+1_1ss21GT	TGAAGCTGCCAGCATGATCTTT	22	low
13	ahy-miR167-3p_2ss8GA15TC	AGATCATATGGCAGCTTCACC	21	low
14	mdm-miR167h_1ss22AT	TGAAGCTGCCAGCATGATCTTT	22	low
15	gra-miR167a_L-2R+2	AGATCATCTTGCAGCTTCAAT	21	low
16	bna-miR168a	TCGCTTGGTGCAGGTCGGGAA	21	highly
17	aly-miR170-5p_1ss8CA	TATTGGCATGGTTCACTCAGA	21	low
18	aly-miR171c-5p_2ss1AG21CA	GGATATTGGTGCGGTTCAATA	21	low
19	bol-miR171a_1ss19AG	TTGAGCCGTGCCAATATCGCG	21	low
20	aly-miR171c-5p_1ss5AG	AGATGTTGGTGCGGTTCAATC	21	low
21	aly-miR171b-3p_1ss19AG	TTGAGCCGTGCCAATATCGCG	21	low
22	gma-miR171m	TTGAGCCGCGTCAATATCTCA	21	low
23	lja-miR171c	TGAGCCGAATCAATATCACTC	21	low
24	nta-miR172d	AGAATCTTGATGATGCTGCAT	21	low
25	ppe-miR172a-5p_1ss21GA	GTAGCATCATCAAGATTCACA	21	low
26	ptc-miR172b-5p	GGAGCATCATCAAGATTCACA	21	low
27	ptc-miR172a	AGAATCTTGATGATGCTGCAT	21	low
28	ath-miR172a	AGAATCTTGATGATGCTGCAT	21	low
29	sly-miR319c-5p_2ss8CT15CT	AGAGCTTTCTTCAGTCCACTC	21	low
30	gma-miR319a	TTGGACTGAAGGGAGCTCCC	20	highly
31	tcc-miR390a	AAGCTCAGGAGGGATAGCGCC	21	low
32	lja-miR390a-3p_1ss8CT	CGCTATCTATCCTGAGTTTCA	21	low
33	ath-miR390a-5p	AAGCTCAGGAGGGATAGCGCC	21	low
34	cpa-miR393_R-1	TCCAAAGGGATCGCATTGATC	21	low
35	aly-miR393a-3p_1ss12TC	ATCATGCTATCCCTTTGGATT	21	low
36	gma-miR393a	TCCAAAGGGATCGCATTGATC	21	low
37	gma-miR394a-5p_R+1_1ss18TA	TTGGCATTCTGTCCACCACCA	21	low
38	ppe-miR397_1ss10GC	TCATTGAGTCCAGCGTTGATG	21	low
39	aly-miR399f-3p	TGCCAAAGGAGATTTGCCCTG	21	low
40	ppe-miR399b_L-2R+2	TGCCAAAGGAGAATTGCCCTG	21	low
41	tcc-miR403a	TTAGATTCACGCACAAACTCG	21	low
42	gma-miR408a-3p_L-1R+1	TGCACTGCCTCTTCCCTGGCT	21	low
43	mdm-miR408a_L-1R+1	TGCACTGCCTCTTCCCTGGCT	21	low
44	mdm-miR477b_1ss20GC	ACTCTCCCTCAAGGGCTTCCAC	22	low
45	mes-miR530a_R+1_1ss20TG	TGCATTTGCACCTGCACCTGA	21	highly
46	ppe-miR535b	TGACGACGAGAGAGAGCACGC	21	highly
47	ath-miR858b	TTCGTTGTCTGTTCGACCTTG	21	highly
48	ptc-miR1448_L+1R+1	TCTTTCCAACGCCTCCCATACC	22	low
49	ppe-miR1511-3p_L+1R-4	AACCTGGCTCTGATACCA	18	low
50	csi-miR1515_1ss16AG	TCATTTTTGCGTGCAGTGATCC	22	low
51	vvi-miR3630-3p_L+3_1ss17CA	GTCTTTGGGAATCTCTATGATGCAC	25	low
52	rgl-miR5139_L-1	AACCTGGCTCTGATACCA	18	low
53	gma-miR6300_R+5	GTCGTTGTAGTATAGTGGTGAGT	23	highly
54	ptc-miR6478_R+2_1ss21GA	CCGACCTTAGCTCAGTTGGTAGA	23	highly
55	stu-miR8016_1ss7GT	ATTTTTTAATGGAAGGCCCATGTG	24	low
