# Supplementary material for: Identification of miRNA–mRNA Regulatory Modules Involved in Lipid Metabolism and Seed Development in a Woody Oil Tree (Camellia oleifera)
Source: Cells. 2021 Dec 27;11(1):71. doi: 10.3390/cells11010071 (PMC8750442; doi:10.3390/cells11010071)
Supplement: Supplementary file 1 [file cells-11-00071-s001.zip › Table S9.xlsx]

## Sheet: Sheet1
Table S9. Novel miRNAs in tea oil camellia seed in this study.
miRNA-Index	miRNA name	miRNA-seq	length	Expression level		pre-miRNA-seq
1	col-miRn-5p-1103_1978	GAAAAATAATGTGTGGTTCAGATT	24	low		tgtatacaaaatttatgtacagaattatacttaGAAAAATAATGTGTGGTTCAGATTcaattctggtatgataaaccccagatcttgaatgAGTTTGAATCACATATTATATTTTCcgagtatttttctgtgtatgaattttgtgttag
2	col-miRn-3p-207095_14	AGTTTGAATCACATATTATATTTTC	25	low		tgtatacaaaatttatgtacagaattatacttaGAAAAATAATGTGTGGTTCAGATTcaattctggtatgataaaccccagatcttgaatgAGTTTGAATCACATATTATATTTTCcgagtatttttctgtgtatgaattttgtgttag
3	col-miRn-5p-2142_1228	ATTGTGTGGTTGAGATTTAATGAC	24	low		ctataatttacaagtaaggatctctagagtttttttttcctaaagtttcttagagtggtgcATTGTGTGATTGAGATTTAATGACaagtcacattaattttttagtATTAAATCTCAACCACACAATACAcgactttaagaaactttaagaaaaaatcactatggaggatctttggtgataatttactt
4	col-miRn-3p-18781_243	ATTAAATCTCAACCACACAATGCA	24	low		ctataatttacaagtaaggatctctagagtttttttttcctaaagtttcttagagtggtgcATTGTGTGATTGAGATTTAATGACaagtcacattaattttttagtATTAAATCTCAACCACACAATACAcgactttaagaaactttaagaaaaaatcactatggaggatctttggtgataatttactt
5	col-miRn-5p-236956_11	GGAATGTTGGTTGGCTCGATGTCT	24	low		tttgtgtatggaagtatttgaggGGAATGTTGGTTGGCTCGATGTCTtcacaagaattgtcggacaaaagggttcgatcaacaagtgaAGATATCGGACCAGGCTTCATTCCtctcaaaataagtccatcatcac
6	col-miRn-3p-61053_79	AGATATCGGACCAGGCTTCATTCC	24	low		tttgtgtatggaagtatttgaggGGAATGTTGGTTGGCTCGATGTCTtcacaagaattgtcggacaaaagggttcgatcaacaagtgaAGATATCGGACCAGGCTTCATTCCtctcaaaataagtccatcatcac
7	col-miRn-3p-210298_13	ACGTCATTTTGATACATTCGAGCC	24	low		atagtttgaatgtattaaaataatgtcattttgggaataaaatgACGTCATTTTGATACATTTGAGCCat
7	col-miRn-3p-210298_13	ACGTCATTTTGATACATTCGAGCC	24	low		tttatggctcaaatgtgtcaaaacgatgtaattttgaggataaaatgACGTCATTTTGATACATTCGAGTCatttg
8	col-miRn-5p-120322_33	AAAAGTTTTATCAAATGTCTCATA	24	low		gatttaaaaattctatcAAAAGTTTTATCAAATGTCTCATAtgggtgtgcgagtctcACTCATGTGAGACATTTGATAGAAcctttcatagaatttttaaggt
9	col-miRn-3p-136946_27	ACCCATGTGAGACATTTGATAGAA	24	low		gatttaaaaattctatcAAAAGTTTTATCAAATGTCTCATAtgggtgtgcgagtctcACTCATGTGAGACATTTGATAGAAcctttcatagaatttttaaggt
10	col-miRn-5p-32910_149	GCTTCTTTTTGCTGCCTCCAC	21	low		ttagggtagtccaattcttatGCTTCTTTTTGCTGCCTCCACtaaattttgtttcccttcggcgaagggaaagaatatttagTGGATGTAGCAAAGAGAAGCTtggaaagggcagtgcccctt
11	col-miRn-3p-145806_25	TGGATGTAGCAAAGAGAAGCT	21	low		ttagggtagtccaattcttatGCTTCTTTTTGCTGCCTCCACtaaattttgtttcccttcggcgaagggaaagaatatttagTGGATGTAGCAAAGAGAAGCTtggaaagggcagtgcccctt
12	col-miRn-5p-28629_169	ACAGAAATCAATCACAGAATTAGA	24	low		ttctattaatACAGAAATCAATCACAGAATTAGAcataatactttcacatagatataaaattcacaagaagatggaacttacgtcttgtgagaaagtaatgtttgattctgtaattgatttctgtatttttaaac
12	col-miRn-5p-28629_169	ACAGAAATCAATCACAGAATTAGA	24	low		ttctattaatACAGAAATCAATCACAGAATTAGAcataatactttcacatagatataaaattcacaaaaagatggaatttacctcttgtgagaaagttatgtttgattctgtaattgatttctgtatttttaaac
13	col-miRn-3p-253727_10	GCGCGGGTCGGGGCGGAGGC	20	low		cccgtctccgccccccggccccgcgtcctccctcgggagggcGCGCGGGTCGGGGCGGCGGCggcggc
14	col-miRn-3p-23356_203	AATTCCTCTCCAAATCTCCCAACC	24	low		atctgtttagttggagaatttaagaaggaatttgaaaagaaaaataaaaaaaaataagtaaaatatacatatatttcacttagtttcatatcttttttctttctctttccaAATTCCTTTCCAAATCTCCCAACCaaacaaagcata
15	col-miRn-3p-33985_144	ACGTCGTTTTGAGACATTCGAGCC	24	low		agcatacctttatatagaaaaaaatgtttggtagctcaaatttgtgtggcccgaataatttgaatgtactaaaacgacgtcattttactcccaaaacgACGTCGTTTTGAGACATTCGAGCTattcaggccataaaaattcggactaccaaacattgttattttatataatagtataga
16	col-miRn-3p-150062_24	CAAATCCTTCCTCAAATCCCC	21	low		gtgtttgattgggagattttgggagagatttggaaaaaataaaggaaaaaaatgtgtgaaactatgtgaaatataattatatttttttcacatttcacatacctttttcattttcttttcCAAATCCATCCTCAAATCCCCaaccaaacatagc
17	col-miRn-3p-16403_272	GTTCAGTGAAGCTGTGGAAAG	21	low		aaatgaccctctttgtatttttccacagctttcttgaactgcattagtgaaatcttaatttttttatgattcaattgttgcgGTTCAGTGAAGCTGTGGAAAGatatagatagggtcaagc
18	col-miRn-3p-152189_23	TGATCGTGTGGTAGCTTCACC	21	low		ttatcgtgcaccactttcagttgaagctgccagcatgatctaaacatacctcctttgttgaggacagattAGATCGTGTGGTAGCTTCACCtgttgttggtgtcacgaaaa
19	col-miRn-3p-88988_50	AATGGTTGTGAGTGATTTGGGACA	24	low		atttgagggcgttccccaaggatcccctgcctcaaaaattctgttctcgtgtctcaaattactcataattattgaatatgtattgagattctcaaatattaagattcttaaatgatctAATGGTTGTGAGTGATTTGAGACAaatggacaaaaaattttagagacagtgatctttgccagattgc
20	col-miRn-3p-27678_175	CATCATTGTGGGTTAAATTGTGAG	24	low		tttgagaaatattagagaccaactcatttaatttcacaaattcacccacagtgatgtggtaaagtagttggacctgtatcattgggtgtaacagatcaaatattgatacctattatgtcaCATCATTGTGGGTTAAATTGTGAGatttttgtgggtttcaaatatttttcatat
21	col-miRn-5p-166889_20	TTGGGGGATTTGGGAAGGAATT	22	low		tacctatgtttggTTGGGAGATTTGGGAAGGAATTgggatagagaaaaagaaaaagtgtgtgaaactagatatattttattgacatttcatttatatttttcttttttattttcaaatcactttctaaattctccaactaaatacagcat
22	col-miRn-5p-46619_106	GGAGCGGCTTGAGATCACATC	21	low		tgtggataggtctaacaGGAGCGACTTGAGATCACATCaaggtgcatttgatcttactgtatgcttgatgatgtgttctcaggtcgcccctgtaagacttcctttcactat
23	col-miRn-5p-68355_69	AAAGGATTTGGAAAGGGAAAGGGA	24	low		aacacctaacgctgtttggtagggatttgggAAAGGATTTGGAAAGGGAAAGAGAagagataggtgaaataagaataaagtatacatatatttcatttagtttcacacactttttctctatctatttccaaatccttctacaaatctcctaacccaaacacagtatgaaaggtac
24	col-miRn-5p-21064_221	ACAGAATGAGACACAGATGTGAGA	24	low		cagttaggagcacagaagattttcACAGAATGAGACACAGATGTGAGAcaaaggtgtagaatccatcttttgtttcacatctatgtcccattttgtgaaaatctcttgtgcacttagatt
25	col-miRn-3p-163119_21	CTTAACATGTGTCCTAAGGGCACA	24	low		ttattgatgtgctcccttagggcacatgttaaaaaagcttagaagtgttgtacattgcacatgagagtgagtgcaataaataaggtacaatacttttaagctctCTTAACATATGTCCTAAGGGCACAtattaacaa
26	col-miRn-5p-17637_256	GGGATTGGTGGCTTGAAAAGC	21	low		ttgggaagtgatgagaaacgggggatgaatatttgccgaaaatctttgGGGATTGGTGGCTTGGAAAGCtttgttcttttctcttttgaatgaatttaatggctttccaagtccaccccttcctattgttttcggtcttctctctcccttttcttctttcgct
27	col-miRn-5p-315953_8	AGAATCTTTCATGATCATCTTCAT	24	low		ggAGAATCTTTCATGATCATCTTCATgacatttttttcatgatccctataaatctaacacaataaatgagtattattttgtatggcaaagctaggaatcatgaaaaaatcttcatgaaaatgaccatgaatgatttatg
28	col-miRn-3p-54304_90	AGTAATGCTTGGATCATGAGAAA	23	low		aaaaatcttcatgatgcatttcatgatatttttttcatgatccctagtattattctttcttgtaagAGTAATGCTTGGATCATGGGAAAaatatcatgaagatgatcataaaagattctc
29	col-miRn-3p-150080_24	TGGAGGAGCTTGATCAAAACGGGAA	25	low		ataccctttttgatcaagcttactccatttttgaaatcaaaagaaagatactattaaaaaTGGAGGAGCTTGATCAAAACGGGAAc
30	col-miRn-5p-97475_44	AATTAGTGTACTAACTAGTGTACC	24	low		ttatatgtatcAATTAGTGTACTAACTAGTGTACTaataggtgatgcagtatcattttagaggttttgaatatttgtaacgtgtataataaatatggtcagtaataatgtcataatattagttggtacactagttagtatattaattggtgcatg
31	col-miRn-3p-99527_43	AGCTTTCTTAACATGTGCCCTAAG	24	low		tggcttcttttgtatataggtcttgttaatatgtgcccttaggacatatgttaagagagcttaaaagtattgtaccttatttattgcactcactctcatgtgcaatgtacaacacttctaAGCTTTTTTAACATGTGCCCTAAGggagcacatcaataaattcctttgtatataatgtgaagtgtc
32	col-miRn-3p-3803_812	TACGGGTTCATAGATGAGGAG	21	low		ctcatttatcaacctgtatatttgaatctttcaactataaaagtgtataatttttactcgctgtataccccttccaagaaggttgtttttatacaatttttatagttgaggggtaatacgTACGGGTTCATAGATGAGGAG
33	col-miRn-3p-18137_250	AAATCTCAACCACACAATGCACCA	24	low		atcctccatagtgattttttcttaaagtttcttaaagtcgtgtATTGTGTGGTTGAGATTTAATACTaaaaaattaatgtgacttgtcattAAATCTCAATCACACAATGCACCActctaagaaactttaggaaaaaaaaactctagagatc
34	col-miRn-3p-91142_48	TGTTAGTGAGAGTGGTAGTGTCCC	24	low		acaacaatgtttggaacactaacactcttattaacaatcttactaatatactcacaagcttggtatgagacccacacaaacttgtgagtgttgatTGTTAGTGAGAGTGGTAGTGTCCCtaacatttgtcat
35	col-miRn-3p-63944_75	ATACAAATGTGAGTGGATGAAAGG	24	low		tcatttcattcacttatatttgtattcattttaatattttaaatcacaattatcatttgtttttgtagATACAAATGTGAGTGGATGAAAGGg
36	col-miRn-5p-209933_13	TGGACCACAACATATAGTAGC	21	low		aaattgggcaactccaggtgatgtgagacacattctaacacactttccTGAACCACAACATATAGTAGCtaaataaacggcacaccaatcacaggctcaaccaattggtgtgccgtttgtctggttactgtatgttgtggtccaggagagtgtgttggaatgtgtatcacatcgcttcaagctgcccaa
37	col-miRn-3p-130934_29	GATTTGATCATGTAGTTATCGATA	24	low		aatcgtctagtatttatatgaatataaaaaattacggtaatcggatattgatagttatatgatcagatttattttttttaatagttaattataacatcattaatttttttatataaaattGATTTGATTATGTAGTTATCGATAtttgattaatttgatttttttattaacatatagtatttgacgagtt
38	col-miRn-3p-171362_19	ATCAATGGTTGAGATCTAAAAGGG	24	low		tcagacccctttatttttggacctccacaaccccttttaaatctcaatcattgatggtgtgggccgcatatatacatgagtgggtctcacatatacATCAATGGTTGAGATCTAAAAGGGattgtgggtattccaaaaaaaaggaagtccca
39	col-miRn-3p-9080_426	AAATCTCCCAACCAAACACAGCGT	24	low		caggatattctaacgctgtttggttggggcatttgagaaggatttgaaagagaaaaggtaggtgaaatgtgtatttttttcAAATCTCCCAACCAAATACAGCGTaaaaaatcaat
40	col-miRn-3p-116669_34	GGTCCTGCTCTGGCAGCCTCACT	23	low		gaggggaataagtgaagctgccagcatgatctagccttggttagtcttagagagggaaagagtataagtatgagggagaagagaggagaaactaaccctagctaGGTCATGCTCTGGCAGCCTCACTccttcccttt
