# Supplementary material for: Identification of miRNA–mRNA Regulatory Modules Involved in Lipid Metabolism and Seed Development in a Woody Oil Tree (Camellia oleifera)
Source: Cells. 2021 Dec 27;11(1):71. doi: 10.3390/cells11010071 (PMC8750442; doi:10.3390/cells11010071)
Supplement: Supplementary file 1 [file cells-11-00071-s001.zip › Table S11.xlsx]

## Sheet: Target_predict_annotation
Table S11. Predicted targets for known and novel miRNAs and their functional annotations in tea oil camellia seeds
miRNA ID	Transcript ID	Gene ID	Gene Annoation	GO	KEGG
mes-miR156a	comp29520_c0	comp29520_c0	-
mes-miR156a	comp50779_c0	comp50779_c0	sp|Q01JD1|SPL7_ORYSI Squamosa promoter-binding-like protein 7 OS=Oryza sativa subsp. indica GN=SPL7 PE=2 SV=1	GO:0005634(nucleus);GO:0003677(DNA binding);GO:0046872(metal ion binding);GO:0006355(regulation of transcription, DNA-dependent);GO:0006351(transcription, DNA-dependent)
mes-miR156a	comp61321_c0	comp61321_c0	-
mes-miR156a	comp59160_c0	comp59160_c0	sp|Q7EXZ2|SPL14_ORYSJ Squamosa promoter-binding-like protein 14 OS=Oryza sativa subsp. japonica GN=SPL14 PE=2 SV=1	GO:0005634(nucleus);GO:0003677(DNA binding);GO:0046872(metal ion binding);GO:0006355(regulation of transcription, DNA-dependent);GO:0006351(transcription, DNA-dependent)
mes-miR156a	comp56544_c0	comp56544_c0	sp|Q6YZE8|SPL16_ORYSJ Squamosa promoter-binding-like protein 16 OS=Oryza sativa subsp. japonica GN=SPL16 PE=2 SV=1	GO:0005634(nucleus);GO:0003677(DNA binding);GO:0046872(metal ion binding);GO:0006355(regulation of transcription, DNA-dependent);GO:0006351(transcription, DNA-dependent)
mes-miR156a	comp57555_c0	comp57555_c0	-
mes-miR156a	comp28268_c0	comp28268_c0	-
mes-miR156a	comp60372_c0	comp60372_c0	sp|Q9S7A9|SPL4_ARATH Squamosa promoter-binding-like protein 4 OS=Arabidopsis thaliana GN=SPL4 PE=1 SV=1	GO:0005737(cytoplasm);GO:0005634(nucleus);GO:0003677(DNA binding);GO:0046872(metal ion binding);GO:0006355(regulation of transcription, DNA-dependent);GO:0010321(regulation of vegetative phase change);GO:0006351(transcription, DNA-dependent)
mes-miR156a	comp66500_c0	comp66500_c0	-
mes-miR156a	comp62492_c0	comp62492_c0	sp|Q38740|SBP2_ANTMA Squamosa promoter-binding protein 2 OS=Antirrhinum majus GN=SBP2 PE=2 SV=1	GO:0005634(nucleus);GO:0003677(DNA binding);GO:0046872(metal ion binding);GO:0006355(regulation of transcription, DNA-dependent);GO:0006351(transcription, DNA-dependent)
mes-miR156a	comp44670_c0	comp44670_c0	sp|Q93WU6|WRK74_ARATH Probable WRKY transcription factor 74 OS=Arabidopsis thaliana GN=WRKY74 PE=2 SV=2	GO:0005634(nucleus);GO:0005516(calmodulin binding);GO:0043565(sequence-specific DNA binding);GO:0003700(sequence-specific DNA binding transcription factor activity)
mes-miR156a	comp56613_c0	comp56613_c0	sp|P19683|ROC4_NICSY 31 kDa ribonucleoprotein, chloroplastic OS=Nicotiana sylvestris PE=1 SV=1	GO:0009507(chloroplast);GO:0030529(ribonucleoprotein complex);GO:0000166(nucleotide binding);GO:0003723(RNA binding);GO:0006397(mRNA processing)
mes-miR156a	comp50391_c0	comp50391_c0	-
mes-miR156a	comp61590_c1	comp61590_c1	sp|Q38741|SBP1_ANTMA Squamosa promoter-binding protein 1 OS=Antirrhinum majus GN=SBP1 PE=2 SV=1	GO:0005634(nucleus);GO:0003677(DNA binding);GO:0046872(metal ion binding);GO:0006355(regulation of transcription, DNA-dependent);GO:0006351(transcription, DNA-dependent)
mes-miR156a	comp53817_c0	comp53817_c0	-
mes-miR156a	comp65185_c0	comp65185_c0	sp|P93768|PSMD3_TOBAC Probable 26S proteasome non-ATPase regulatory subunit 3 OS=Nicotiana tabacum GN=21D7 PE=2 SV=1	GO:0005634(nucleus);GO:0000502(proteasome complex);GO:0030234(enzyme regulator activity);GO:0042176(regulation of protein catabolic process)	ko03050(Proteasome)
mes-miR156a	comp64035_c0	comp64035_c0	sp|Q39227|SMT2_ARATH 24-methylenesterol C-methyltransferase 2 OS=Arabidopsis thaliana GN=SMT2 PE=1 SV=2	GO:0005783(endoplasmic reticulum);GO:0030797(24-methylenesterol C-methyltransferase activity);GO:0009825(multidimensional cell growth);GO:0032876(negative regulation of DNA endoreduplication);GO:0016126(sterol biosynthetic process);GO:0010051(xylem and phloem pattern formation)	ko00100(Steroid biosynthesis)
mes-miR156a	comp50391_c0	comp50391_c0	-
mes-miR156a	comp874101_c0	comp874101_c0	-
mes-miR156a	comp13910_c0	comp13910_c0	-
mes-miR156a	comp40233_c0	comp40233_c0	-
mes-miR156a	comp23752_c0	comp23752_c0	-
mes-miR156a	comp32258_c0	comp32258_c0	-
mes-miR156a	comp38726_c0	comp38726_c0	sp|B0F481|BIODA_ARATH Bifunctional dethiobiotin synthetase/7,8-diamino-pelargonic acid aminotransferase, mitochondrial OS=Arabidopsis thaliana GN=BIO3-BIO1 PE=1 SV=1		ko00780(Biotin metabolism)
mes-miR156a	comp62715_c0	comp62715_c0	sp|O82702|VATG1_TOBAC V-type proton ATPase subunit G 1 OS=Nicotiana tabacum GN=VATG1 PE=1 SV=1	GO:0016471(vacuolar proton-transporting V-type ATPase complex);GO:0016820(hydrolase activity, acting on acid anhydrides, catalyzing transmembrane movement of substances);GO:0015992(proton transport)	ko00190(Oxidative phosphorylation);ko04145(Phagosome);ko04966(Collecting duct acid secretion)
mes-miR156a	comp14293_c0	comp14293_c0	sp|Q8VYW6|GAGT1_ARATH Gamma-glutamyltranspeptidase 1 OS=Arabidopsis thaliana GN=GGT1 PE=2 SV=1		ko00430(Taurine and hypotaurine metabolism);ko00450(Selenoamino acid metabolism);ko00460(Cyanoamino acid metabolism);ko00480(Glutathione metabolism);ko00590(Arachidonic acid metabolism)
mes-miR156a	comp52757_c0	comp52757_c0	sp|Q54TS4|YIPF1_DICDI Protein YIPF1 homolog OS=Dictyostelium discoideum GN=yipf1 PE=3 SV=1	GO:0016021(integral to membrane)
mes-miR156a	comp66183_c0	comp66183_c0	-
mes-miR156a	comp31625_c0	comp31625_c0	sp|Q9FNP1|PEX1_ARATH Peroxisome biogenesis protein 1 OS=Arabidopsis thaliana GN=PEX1 PE=2 SV=2	GO:0005777(peroxisome);GO:0005524(ATP binding);GO:0017111(nucleoside-triphosphatase activity);GO:0006635(fatty acid beta-oxidation);GO:0016558(protein import into peroxisome matrix)
mes-miR156a	comp64989_c0	comp64989_c0	sp|Q9LMR5|FK126_ARATH F-box/kelch-repeat protein At1g15670 OS=Arabidopsis thaliana GN=At1g15670 PE=2 SV=1
mes-miR156a	comp59746_c0	comp59746_c0	sp|P19954|PRSP1_SPIOL Ribosome-binding factor PSRP1, chloroplastic OS=Spinacia oleracea GN=PSRP1 PE=1 SV=2	GO:0009570(chloroplast stroma);GO:0005840(ribosome);GO:0019843(rRNA binding);GO:0044238(primary metabolic process)
mes-miR156a	comp68545_c0	comp68545_c0	sp|Q9ZWA1|C3H2_ARATH Zinc finger CCCH domain-containing protein 2 OS=Arabidopsis thaliana GN=At1g03790 PE=2 SV=1	GO:0005634(nucleus);GO:0003677(DNA binding);GO:0008270(zinc ion binding);GO:0010187(negative regulation of seed germination);GO:0006355(regulation of transcription, DNA-dependent);GO:0006351(transcription, DNA-dependent)
mes-miR156a	comp59181_c0	comp59181_c0	-
mes-miR156a	comp289107_c0	comp289107_c0	-
mes-miR156a	comp403301_c0	comp403301_c0	sp|P12411|TBB1_ARATH Tubulin beta-1 chain OS=Arabidopsis thaliana GN=TUBB1 PE=2 SV=1	GO:0005874(microtubule);GO:0005773(vacuole);GO:0005525(GTP binding);GO:0003924(GTPase activity);GO:0005198(structural molecule activity);GO:0007018(microtubule-based movement);GO:0051258(protein polymerization);GO:0009416(response to light stimulus);GO:0009826(unidimensional cell growth)	ko04145(Phagosome);ko04540(Gap junction)
mes-miR156a	comp5728_c0	comp5728_c0	sp|Q01289|POR_PEA Protochlorophyllide reductase, chloroplastic OS=Pisum sativum GN=3PCR PE=1 SV=1	GO:0009507(chloroplast);GO:0005488(binding);GO:0016630(protochlorophyllide reductase activity);GO:0015995(chlorophyll biosynthetic process);GO:0015979(photosynthesis)	ko00860(Porphyrin and chlorophyll metabolism)
mes-miR156a	comp68552_c0	comp68552_c0	sp|P76594|YFIQ_ECOLI Uncharacterized protein YfiQ OS=Escherichia coli (strain K12) GN=yfiQ PE=4 SV=1	GO:0005524(ATP binding);GO:0046872(metal ion binding);GO:0008080(N-acetyltransferase activity)
mes-miR156a	comp52254_c0	comp52254_c0	-
mes-miR156a	comp68539_c0	comp68539_c0	sp|P46837|YHGF_ECOLI Protein YhgF OS=Escherichia coli (strain K12) GN=yhgF PE=1 SV=3	GO:0016788(hydrolase activity, acting on ester bonds);GO:0003723(RNA binding);GO:0006139(nucleobase, nucleoside, nucleotide and nucleic acid metabolic process)	ko00230(Purine metabolism);ko00250(Alanine,ko aspartate and glutamate metabolism)
mes-miR156a	comp48240_c0	comp48240_c0	-
mes-miR156a	comp68518_c0	comp68518_c0	sp|Q46814|XDHD_ECOLI Probable hypoxanthine oxidase XdhD OS=Escherichia coli (strain K12) GN=xdhD PE=3 SV=1	GO:0051537(2 iron, 2 sulfur cluster binding);GO:0009055(electron carrier activity);GO:0046872(metal ion binding);GO:0016491(oxidoreductase activity);GO:0006144(purine base metabolic process);GO:0006166(purine ribonucleoside salvage)	ko03018(RNA degradation)
mes-miR156a	comp68377_c0	comp68377_c0	sp|P0AES7|GYRB_ECO57 DNA gyrase subunit B OS=Escherichia coli O157:H7 GN=gyrB PE=3 SV=2	GO:0005694(chromosome);GO:0005737(cytoplasm);GO:0005524(ATP binding);GO:0003918(DNA topoisomerase );GO:0006265(DNA topological change);GO:0046677(response to antibiotic)
mes-miR156a	comp56742_c0	comp56742_c0	sp|Q6NMC6|ABIL3_ARATH Protein ABIL3 OS=Arabidopsis thaliana GN=ABIL3 PE=2 SV=1	GO:0005737(cytoplasm);GO:0015630(microtubule cytoskeleton);GO:0048364(root development);GO:0010090(trichome morphogenesis)
mes-miR156a	comp376785_c0	comp376785_c0	-
mes-miR156a	comp380452_c0	comp380452_c0	-
mes-miR156a	comp605453_c0	comp605453_c0	-
mes-miR156a	comp50440_c0	comp50440_c0	-
mes-miR156a	comp57869_c0	comp57869_c0	sp|Q9STV4|CIPK8_ARATH CBL-interacting serine/threonine-protein kinase 8 OS=Arabidopsis thaliana GN=CIPK8 PE=1 SV=1	GO:0005886(plasma membrane);GO:0005524(ATP binding);GO:0004674(protein serine/threonine kinase activity);GO:0046777(protein autophosphorylation);GO:0009749(response to glucose stimulus);GO:0010167(response to nitrate);GO:0048364(root development);GO:0007165(signal transduction)
mes-miR156a	comp37961_c0	comp37961_c0	-
mes-miR156a	comp39727_c0	comp39727_c0	-
mes-miR156a	comp54718_c0	comp54718_c0	sp|Q9ZVN2|Y1457_ARATH Acyltransferase-like protein At1g54570, chloroplastic OS=Arabidopsis thaliana GN=At1g54570 PE=1 SV=1	GO:0010287(plastoglobule);GO:0016747(transferase activity, transferring acyl groups other than amino-acyl groups)
mes-miR156a	comp60678_c0	comp60678_c0	-
mes-miR156a	comp48536_c0	comp48536_c0	-
mes-miR156a	comp39672_c0	comp39672_c0	-
mes-miR156a	comp66521_c0	comp66521_c0	sp|P31531|1A1C_SOYBN 1-aminocyclopropane-1-carboxylate synthase OS=Glycine max GN=ACS1 PE=2 SV=1	GO:0016847(1-aminocyclopropane-1-carboxylate synthase activity);GO:0030170(pyridoxal phosphate binding);GO:0016769(transferase activity, transferring nitrogenous groups);GO:0009693(ethylene biosynthetic process);GO:0009835(ripening)	ko00270(Cysteine and methionine metabolism)
mes-miR156a	comp61977_c0	comp61977_c0	-
mes-miR156a	comp44038_c0	comp44038_c0	-
mes-miR156a	comp67675_c0	comp67675_c0	sp|Q5R9I5|SYDC_PONAB Aspartate--tRNA ligase, cytoplasmic OS=Pongo abelii GN=DARS PE=2 SV=1	GO:0005737(cytoplasm);GO:0004815(aspartate-tRNA ligase activity);GO:0005524(ATP binding);GO:0003676(nucleic acid binding);GO:0006422(aspartyl-tRNA aminoacylation)	ko00970(Aminoacyl-tRNA biosynthesis)
mes-miR156a	comp15404_c0	comp15404_c0	sp|Q8T4E1|GPI8_DROME Putative GPI-anchor transamidase OS=Drosophila melanogaster GN=CG4406 PE=2 SV=1	GO:0042765(GPI-anchor transamidase complex);GO:0004197(cysteine-type endopeptidase activity);GO:0003923(GPI-anchor transamidase activity);GO:0006506(GPI anchor biosynthetic process);GO:0006508(proteolysis)
mes-miR156a	comp67494_c0	comp67494_c0	sp|P92973|CCA1_ARATH Protein CCA1 OS=Arabidopsis thaliana GN=CCA1 PE=1 SV=1	GO:0005634(nucleus);GO:0005515(protein binding);GO:0043565(sequence-specific DNA binding);GO:0007623(circadian rhythm);GO:0048574(long-day photoperiodism, flowering);GO:0042754(negative regulation of circadian rhythm);GO:0045892(negative regulation of transcription, DNA-dependent);GO:0045893(positive regulation of transcription, DNA-dependent);GO:0043496(regulation of protein homodimerization act…	ko04712(Circadian rhythm - plant)
mes-miR156a	comp62467_c0	comp62467_c0	-
mes-miR156a	comp61590_c1	comp61590_c1	sp|Q38741|SBP1_ANTMA Squamosa promoter-binding protein 1 OS=Antirrhinum majus GN=SBP1 PE=2 SV=1	GO:0005634(nucleus);GO:0003677(DNA binding);GO:0046872(metal ion binding);GO:0006355(regulation of transcription, DNA-dependent);GO:0006351(transcription, DNA-dependent)
mes-miR156a	comp56613_c0	comp56613_c0	sp|P19683|ROC4_NICSY 31 kDa ribonucleoprotein, chloroplastic OS=Nicotiana sylvestris PE=1 SV=1	GO:0009507(chloroplast);GO:0030529(ribonucleoprotein complex);GO:0000166(nucleotide binding);GO:0003723(RNA binding);GO:0006397(mRNA processing)
mes-miR156a	comp34428_c0	comp34428_c0	-
mes-miR156a	comp1066087_c0	comp1066087_c0	-
mes-miR156a	comp27865_c0	comp27865_c0	-
mes-miR156a	comp68554_c0	comp68554_c0	sp|B7L9I6|SYL_ECO55 Leucine--tRNA ligase OS=Escherichia coli (strain 55989 / EAEC) GN=leuS PE=3 SV=1	GO:0005737(cytoplasm);GO:0005524(ATP binding);GO:0004823(leucine-tRNA ligase activity);GO:0006429(leucyl-tRNA aminoacylation)	ko00290(Valine,ko leucine and isoleucine biosynthesis);ko00970(Aminoacyl-tRNA biosynthesis)
mes-miR156a	comp26551_c0	comp26551_c0	-
mes-miR156a	comp46170_c0	comp46170_c0	-
mes-miR156a	comp31248_c0	comp31248_c0	sp|P50165|TRNH_DATST Tropinone reductase homolog OS=Datura stramonium PE=2 SV=1	GO:0005488(binding);GO:0016491(oxidoreductase activity)	ko00960(Tropane,ko piperidine and pyridine alkaloid biosynthesis)
mes-miR156a	comp53405_c0	comp53405_c0	-
mes-miR156a	comp271059_c0	comp271059_c0	-
mes-miR156a	comp302576_c0	comp302576_c0	-
mes-miR156a	comp8348_c0	comp8348_c0	-
mes-miR156a	comp615938_c0	comp615938_c0	-
mes-miR156a	comp25077_c0	comp25077_c0	sp|Q9FF61|SM3L1_ARATH Putative SWI/SNF-related matrix-associated actin-dependent regulator of chromatin subfamily A member 3-like 1 OS=Arabidopsis thaliana GN=At5g05130 PE=2 SV=1	GO:0005634(nucleus);GO:0005524(ATP binding);GO:0003677(DNA binding);GO:0004386(helicase activity);GO:0008270(zinc ion binding);GO:0016568(chromatin modification);GO:0006351(transcription, DNA-dependent)
mes-miR156a	comp57720_c0	comp57720_c0	sp|O80689|BGL45_ARATH Beta-glucosidase 45 OS=Arabidopsis thaliana GN=BGLU45 PE=1 SV=1	GO:0043169(cation binding);GO:0047782(coniferin beta-glucosidase activity);GO:0005975(carbohydrate metabolic process);GO:0009809(lignin biosynthetic process)	ko00460(Cyanoamino acid metabolism);ko00500(Starch and sucrose metabolism);ko00940(Phenylpropanoid biosynthesis)
mes-miR156a	comp43346_c0	comp43346_c0	-
mes-miR156a	comp68123_c0	comp68123_c0	sp|A7ZTV2|MNMG_ECO24 tRNA uridine 5-carboxymethylaminomethyl modification enzyme MnmG OS=Escherichia coli O139:H28 (strain E24377A / ETEC) GN=mnmG PE=3 SV=1	GO:0005737(cytoplasm);GO:0050660(flavin adenine dinucleotide binding);GO:0002098(tRNA wobble uridine modification)	ko00190(Oxidative phosphorylation)
mes-miR156a	comp184835_c0	comp184835_c0	-
mes-miR156a	comp260986_c0	comp260986_c0	-
mes-miR156a	comp32660_c0	comp32660_c0	sp|Q9FGD6|DOF58_ARATH Dof zinc finger protein DOF5.8 OS=Arabidopsis thaliana GN=DOF5.8 PE=2 SV=1	GO:0005634(nucleus);GO:0003677(DNA binding);GO:0008270(zinc ion binding);GO:0006355(regulation of transcription, DNA-dependent);GO:0006351(transcription, DNA-dependent)
mes-miR156a	comp49033_c0	comp49033_c0	-
mes-miR156a	comp35895_c0	comp35895_c0	-
mes-miR156a	comp68073_c0	comp68073_c0	sp|P10443|DPO3A_ECOLI DNA polymerase III subunit alpha OS=Escherichia coli (strain K12) GN=dnaE PE=1 SV=1	GO:0005737(cytoplasm);GO:0008408(3'-5' exonuclease activity);GO:0003677(DNA binding);GO:0003887(DNA-directed DNA polymerase activity);GO:0005515(protein binding);GO:0006260(DNA replication)	ko00900(Terpenoid backbone biosynthesis)
mes-miR156a	comp67737_c0	comp67737_c0	sp|P37650|BCSC_ECOLI Cellulose synthase operon protein C OS=Escherichia coli (strain K12) GN=bcsC PE=1 SV=3	GO:0019867(outer membrane);GO:0005488(binding);GO:0030244(cellulose biosynthetic process)
mes-miR156a	comp325724_c0	comp325724_c0	-
mes-miR156a	comp68170_c0	comp68170_c0	sp|P07363|CHEA_ECOLI Chemotaxis protein CheA OS=Escherichia coli (strain K12) GN=cheA PE=1 SV=3	GO:0005737(cytoplasm);GO:0005524(ATP binding);GO:0000155(two-component sensor activity);GO:0006935(chemotaxis);GO:0051649(establishment of localization in cell);GO:0018106(peptidyl-histidine phosphorylation);GO:0035307(positive regulation of protein dephosphorylation);GO:0046777(protein autophosphorylation)	ko00500(Starch and sucrose metabolism)
mes-miR156a	comp57872_c0	comp57872_c0	sp|Q93X17|SNAK2_SOLTU Snakin-2 OS=Solanum tuberosum GN=SN2 PE=1 SV=1	GO:0005618(cell wall);GO:0005576(extracellular region);GO:0006952(defense response)
mes-miR156a	comp9361_c0	comp9361_c0	-
mes-miR156a	comp15370_c0	comp15370_c0	sp|P29057|HMDH1_HEVBR 3-hydroxy-3-methylglutaryl-coenzyme A reductase 1 OS=Hevea brasiliensis GN=HMGR1 PE=2 SV=1	GO:0005789(endoplasmic reticulum membrane);GO:0016021(integral to membrane);GO:0031966(mitochondrial membrane);GO:0042170(plastid membrane);GO:0004420(hydroxymethylglutaryl-CoA reductase );GO:0050661(NADP binding);GO:0015936(coenzyme A metabolic process);GO:0008299(isoprenoid biosynthetic process)	ko00900(Terpenoid backbone biosynthesis)
mes-miR156a	comp67328_c0	comp67328_c0	sp|P35340|AHPF_ECOLI Alkyl hydroperoxide reductase subunit F OS=Escherichia coli (strain K12) GN=ahpF PE=1 SV=2	GO:0005829(cytosol);GO:0009055(electron carrier activity);GO:0050660(flavin adenine dinucleotide binding);GO:0051287(NAD binding);GO:0016651(oxidoreductase activity, acting on NADH or NADPH);GO:0015035(protein disulfide oxidoreductase activity);GO:0045454(cell redox homeostasis)
mes-miR156a	comp427004_c0	comp427004_c0	-
mes-miR156a	comp60534_c0	comp60534_c0	-
mes-miR156a	comp32776_c0	comp32776_c0	-
mes-miR156a	comp67401_c0	comp67401_c0	-
mes-miR156a	comp13909_c0	comp13909_c0	-
mes-miR156a	comp55095_c0	comp55095_c0	-
mes-miR156a	comp171792_c0	comp171792_c0	-
mes-miR156a	comp492245_c0	comp492245_c0	-
mes-miR156a	comp62173_c0	comp62173_c0	-
mes-miR156a	comp61421_c0	comp61421_c0	sp|P46032|PTR2_ARATH Peptide transporter PTR2 OS=Arabidopsis thaliana GN=PTR2 PE=1 SV=1	GO:0016021(integral to membrane);GO:0000325(plant-type vacuole);GO:0005774(vacuolar membrane);GO:0042936(dipeptide transporter activity);GO:0015334(high affinity oligopeptide transporter activity);GO:0042937(tripeptide transporter activity);GO:0015031(protein transport)
mes-miR156a	comp65428_c1	comp65428_c1	sp|Q8RYD1|REM16_ARATH B3 domain-containing protein REM16 OS=Arabidopsis thaliana GN=REM16 PE=2 SV=1	GO:0005634(nucleus);GO:0005773(vacuole);GO:0003677(DNA binding);GO:0006355(regulation of transcription, DNA-dependent);GO:0006351(transcription, DNA-dependent)
mes-miR156a	comp270783_c0	comp270783_c0	sp|A8WYE4|PAR1_CAEBR Serine/threonine-protein kinase par-1 OS=Caenorhabditis briggsae GN=par-1 PE=3 SV=1	GO:0005938(cell cortex);GO:0005524(ATP binding);GO:0046872(metal ion binding);GO:0004674(protein serine/threonine kinase activity);GO:0007275(multicellular organismal development)
mes-miR156a	comp36689_c0	comp36689_c0	-
mes-miR156a	comp62968_c0	comp62968_c0	sp|Q7VG78|GUAA_HELHP Probable GMP synthase [glutamine-hydrolyzing] OS=Helicobacter hepaticus (strain ATCC 51449 / 3B1) GN=guaA PE=3 SV=1	GO:0004066(asparagine synthase );GO:0005524(ATP binding);GO:0008725(DNA-3-methyladenine glycosylase I activity);GO:0003922(GMP synthase );GO:0008080(N-acetyltransferase activity);GO:0006529(asparagine biosynthetic process);GO:0006284(base-excision repair);GO:0006541(glutamine metabolic process);GO:0006177(GMP biosynthetic process)	ko03410(Base excision repair)
mes-miR156a	comp68407_c0	comp68407_c0	sp|P59015|VPS18_DANRE Vacuolar protein sorting-associated protein 18 homolog OS=Danio rerio GN=vps18 PE=2 SV=2	GO:0031902(late endosome membrane);GO:0005765(lysosomal membrane);GO:0008270(zinc ion binding);GO:0045176(apical protein localization);GO:0015721(bile acid and bile salt transport);GO:0008333(endosome to lysosome transport);GO:0043485(endosome to pigment granule transport);GO:0048069(eye pigmentation);GO:0007275(multicellular organismal development);GO:0007634(optokinetic behavior);GO:0015031(pro…
mes-miR156a	comp60895_c0	comp60895_c0	-
mes-miR156a	comp60782_c0	comp60782_c0	sp|Q9LV77|ASNS2_ARATH Asparagine synthetase [glutamine-hydrolyzing] 2 OS=Arabidopsis thaliana GN=ASN2 PE=1 SV=1		ko00250(Alanine,ko aspartate and glutamate metabolism);ko00910(Nitrogen metabolism)
mes-miR156a	comp561112_c0	comp561112_c0	-
mes-miR156a	comp57095_c0	comp57095_c0	sp|Q9LRP7|ATG8I_ARATH Autophagy-related protein 8i OS=Arabidopsis thaliana GN=ATG8I PE=2 SV=1	GO:0000421(autophagic vacuole membrane);GO:0033110(CVT vesicle membrane);GO:0005874(microtubule);GO:0006914(autophagy);GO:0015031(protein transport)	ko04140(Regulation of autophagy)
mes-miR156a	comp60522_c0	comp60522_c0	sp|Q8L899|BRI1_SOLPE Systemin receptor SR160 OS=Solanum peruvianum PE=1 SV=1	GO:0016021(integral to membrane);GO:0005886(plasma membrane);GO:0005524(ATP binding);GO:0004674(protein serine/threonine kinase activity);GO:0004872(receptor activity);GO:0005496(steroid binding);GO:0006952(defense response)
mes-miR156a	comp48215_c0	comp48215_c0	-
mes-miR156a	comp52976_c0	comp52976_c0	-
mes-miR156a	comp64009_c0	comp64009_c0	sp|Q9SJM0|CALSA_ARATH Callose synthase 10 OS=Arabidopsis thaliana GN=CALS10 PE=2 SV=5	GO:0000148(1,3-beta-D-glucan synthase complex);GO:0016021(integral to membrane);GO:0009506(plasmodesma);GO:0003843(1,3-beta-D-glucan synthase activity);GO:0006075(1,3-beta-D-glucan biosynthetic process);GO:0007047(cellular cell wall organization);GO:0048589(developmental growth);GO:0009556(microsporogenesis);GO:0008360(regulation of cell shape)
mes-miR156a	comp2242_c0	comp2242_c0	-
mes-miR156a	comp39357_c0	comp39357_c0	-
mes-miR156a	comp273531_c0	comp273531_c0	-
mes-miR156a	comp60507_c0	comp60507_c0	sp|Q9C5Q8|HEN1_ARATH Small RNA 2'-O-methyltransferase OS=Arabidopsis thaliana GN=HEN1 PE=1 SV=1	GO:0005737(cytoplasm);GO:0005634(nucleus);GO:0046872(metal ion binding);GO:0003723(RNA binding);GO:0008173(RNA methyltransferase activity);GO:0035279(mRNA cleavage involved in gene silencing by miRNA);GO:0035196(production of miRNAs involved in gene silencing by miRNA);GO:0030422(production of siRNA involved in RNA interference);GO:0009909(regulation of flower development);GO:0010093(specificatio…
mes-miR156a	comp48231_c0	comp48231_c0	-
mes-miR156a	comp902598_c0	comp902598_c0	-
mes-miR156a	comp498856_c0	comp498856_c0	-
mes-miR156a	comp50095_c0	comp50095_c0	-
mes-miR156a	comp53846_c0	comp53846_c0	sp|Q94B77|FH5_ARATH Formin-like protein 5 OS=Arabidopsis thaliana GN=FH5 PE=2 SV=2	GO:0005618(cell wall);GO:0016021(integral to membrane);GO:0009524(phragmoplast);GO:0003779(actin binding);GO:0030041(actin filament polymerization);GO:0045010(actin nucleation);GO:0009960(endosperm development);GO:0048317(seed morphogenesis)
mes-miR156a	comp51316_c0	comp51316_c0	-
mes-miR156a	comp440325_c0	comp440325_c0	-
mes-miR156a	comp29522_c0	comp29522_c0	-
mes-miR156a	comp68519_c0	comp68519_c0	sp|P30855|EVGS_ECOLI Sensor protein EvgS OS=Escherichia coli (strain K12) GN=evgS PE=1 SV=2	GO:0016021(integral to membrane);GO:0030288(outer membrane-bounded periplasmic space);GO:0005886(plasma membrane);GO:0005524(ATP binding);GO:0005215(transporter activity);GO:0000156(two-component response regulator activity);GO:0000155(two-component sensor activity);GO:0018106(peptidyl-histidine phosphorylation);GO:0006355(regulation of transcription, DNA-dependent)
mes-miR156a	comp36926_c0	comp36926_c0	-
mes-miR156a	comp68476_c0	comp68476_c0	sp|C4ZVX0|MALT_ECOBW HTH-type transcriptional regulator MalT OS=Escherichia coli (strain K12 / MC4100 / BW2952) GN=malT PE=3 SV=1	GO:0005622(intracellular);GO:0005524(ATP binding);GO:0043565(sequence-specific DNA binding);GO:0003700(sequence-specific DNA binding transcription factor activity);GO:0000156(two-component response regulator activity);GO:0005975(carbohydrate metabolic process)	ko00030(Pentose phosphate pathway);ko00710(Carbon fixation in photosynthetic organisms);ko01051(Biosynthesis of ansamycins)
mes-miR156a	comp16630_c0	comp16630_c0	-
mes-miR156a	comp43626_c0	comp43626_c0	sp|B8BPI2|CSPLU_ORYSI CASP-like protein OsI_38237 OS=Oryza sativa subsp. indica GN=OsI_38237 PE=2 SV=1
mes-miR156a	comp44451_c0	comp44451_c0	-
mes-miR156a	comp48745_c0	comp48745_c0	sp|Q9SHE9|LBD4_ARATH LOB domain-containing protein 4 OS=Arabidopsis thaliana GN=LBD4 PE=2 SV=1		ko00240(Pyrimidine metabolism);ko00250(Alanine,ko aspartate and glutamate metabolism)
mes-miR156a	comp67297_c0	comp67297_c0	sp|P39452|RIR3_ECOLI Ribonucleoside-diphosphate reductase 2 subunit alpha OS=Escherichia coli (strain K12) GN=nrdE PE=3 SV=3	GO:0005971(ribonucleoside-diphosphate reductase complex);GO:0005524(ATP binding);GO:0004748(ribonucleoside-diphosphate reductase activity);GO:0006260(DNA replication)	ko00020(Citrate cycle );ko00720(Reductive carboxylate cycle )
mes-miR156a	comp59695_c0	comp59695_c0	-
mes-miR156a	comp31318_c0	comp31318_c0	-
mes-miR156a	comp68428_c0	comp68428_c0	sp|P30015|LHR_ECOLI Probable ATP-dependent helicase lhr OS=Escherichia coli (strain K12) GN=lhr PE=3 SV=2	GO:0005524(ATP binding);GO:0008026(ATP-dependent helicase activity);GO:0003676(nucleic acid binding)	ko00970(Aminoacyl-tRNA biosynthesis)
mes-miR156a	comp631424_c0	comp631424_c0	-
mes-miR156a	comp26205_c0	comp26205_c0	-
mes-miR156a	comp66331_c0	comp66331_c0	sp|P0A9M8|PTA_ECOLI Phosphate acetyltransferase OS=Escherichia coli (strain K12) GN=pta PE=1 SV=2	GO:0005737(cytoplasm);GO:0008959(phosphate acetyltransferase activity);GO:0005515(protein binding);GO:0008270(zinc ion binding);GO:0019413(acetate biosynthetic process);GO:0045733(acetate catabolic process);GO:0019427(acetyl-CoA biosynthetic process from acetate);GO:0070689(L-threonine catabolic process to propionate)	ko00230(Purine metabolism);ko00250(Alanine,ko aspartate and glutamate metabolism)
mes-miR156a	comp55078_c0	comp55078_c0	-
mes-miR156a	comp59335_c0	comp59335_c0	-
mes-miR156a	comp36761_c0	comp36761_c0	-
mes-miR156a	comp41824_c0	comp41824_c0	-
mes-miR156a	comp512346_c0	comp512346_c0	-
mes-miR156a	comp41065_c0	comp41065_c0	-
mes-miR156a	comp11431_c0	comp11431_c0	-
mes-miR156a	comp160306_c0	comp160306_c0	sp|Q5ZCI1|MPK10_ORYSJ Mitogen-activated protein kinase 10 OS=Oryza sativa subsp. japonica GN=MPK10 PE=2 SV=2	GO:0005524(ATP binding);GO:0004707(MAP kinase activity)
mes-miR156a	comp36128_c0	comp36128_c0	sp|Q9SCT6|Y3172_ARATH WEB family protein At3g51720 OS=Arabidopsis thaliana GN=At3g51720 PE=2 SV=1
mes-miR156a	comp67120_c1	comp67120_c1	sp|P77199|YAIT_ECOLI Putative uncharacterized protein YaiT OS=Escherichia coli (strain K12) GN=yaiT PE=5 SV=2	GO:0019867(outer membrane);GO:0016807(cysteine-type carboxypeptidase activity);GO:0071972(peptidoglycan L,D-transpeptidase activity);GO:0016755(transferase activity, transferring amino-acyl groups);GO:0007155(cell adhesion);GO:0010382(cellular cell wall macromolecule metabolic process);GO:0043164(Gram-negative-bacterium-type cell wall biogenesis)	ko00860(Porphyrin and chlorophyll metabolism)
mes-miR156a	comp368399_c0	comp368399_c0	-
mes-miR156a	comp175324_c0	comp175324_c0	-
mes-miR156a	comp10092_c0	comp10092_c0	-
mes-miR156a	comp507805_c0	comp507805_c0	-
mes-miR156a	comp269541_c0	comp269541_c0	-
mes-miR156a	comp65565_c0	comp65565_c0	sp|P0ABB9|ATMA_ECO57 Magnesium-transporting ATPase, P-type 1 OS=Escherichia coli O157:H7 GN=mgtA PE=3 SV=1	GO:0016021(integral to membrane);GO:0005886(plasma membrane);GO:0005524(ATP binding);GO:0015444(magnesium-importing ATPase activity);GO:0046872(metal ion binding);GO:0006754(ATP biosynthetic process)
mes-miR156a	comp60207_c0	comp60207_c0	-
mes-miR156a	comp66318_c0	comp66318_c0	sp|B1X8Q2|RLMKL_ECODH Ribosomal RNA large subunit methyltransferase K/L OS=Escherichia coli (strain K12 / DH10B) GN=rlmL PE=3 SV=1	GO:0005737(cytoplasm);GO:0003723(RNA binding);GO:0008990(rRNA )
mes-miR156a	comp20138_c0	comp20138_c0	sp|Q9M9W1|RL222_ARATH 60S ribosomal protein L22-2 OS=Arabidopsis thaliana GN=RPL22B PE=2 SV=1	GO:0022625(cytosolic large ribosomal subunit);GO:0005730(nucleolus);GO:0005886(plasma membrane);GO:0009506(plasmodesma);GO:0003735(structural constituent of ribosome);GO:0006412(translation)	ko03010(Ribosome)
mes-miR156a	comp41349_c0	comp41349_c0	sp|Q10EJ2|CSPLU_ORYSJ CASP-like protein Os03g0767900 OS=Oryza sativa subsp. japonica GN=Os03g0767900 PE=2 SV=1
mes-miR156a	comp41981_c0	comp41981_c0	sp|Q8VZF3|CGEP_ARATH Probable glutamyl endopeptidase, chloroplastic OS=Arabidopsis thaliana GN=GEP PE=2 SV=2	GO:0009570(chloroplast stroma);GO:0008236(serine-type peptidase activity);GO:0006508(proteolysis)
mes-miR156a	comp57913_c0	comp57913_c0	sp|Q6E2Z6|REHY_MEDTR 1-Cys peroxiredoxin OS=Medicago truncatula PE=2 SV=1	GO:0005634(nucleus);GO:0004601(peroxidase activity);GO:0051920(peroxiredoxin activity)	ko00360(Phenylalanine metabolism);ko00680(Methane metabolism);ko00940(Phenylpropanoid biosynthesis)
mes-miR156a	comp63815_c0	comp63815_c0	sp|O55236|MCE1_MOUSE mRNA-capping enzyme OS=Mus musculus GN=Rngtt PE=1 SV=1	GO:0005525(GTP binding);GO:0004484(mRNA guanylyltransferase activity);GO:0004651(polynucleotide 5'-phosphatase activity);GO:0004725(protein tyrosine phosphatase activity);GO:0008138(protein tyrosine/serine/threonine phosphatase activity);GO:0006370(mRNA capping)
mes-miR156a	comp6222_c0	comp6222_c0	-
mes-miR156a	comp54290_c0	comp54290_c0	-
mes-miR156a	comp55127_c0	comp55127_c0	-
mes-miR156a	comp59294_c0	comp59294_c0	sp|O22775|GT2_ARATH Putative glycosyltransferase 2 OS=Arabidopsis thaliana GN=GT2 PE=2 SV=1	GO:0000139(Golgi membrane);GO:0016021(integral to membrane);GO:0016758(transferase activity, transferring hexosyl groups);GO:0035252(UDP-xylosyltransferase activity);GO:0033843(xyloglucan 6-xylosyltransferase activity);GO:0048767(root hair elongation);GO:0009969(xyloglucan biosynthetic process)
mes-miR156a	comp65167_c0	comp65167_c0	sp|Q9SUD4|TET7_ARATH Tetraspanin-7 OS=Arabidopsis thaliana GN=TET7 PE=2 SV=1
mes-miR156a	comp58493_c0	comp58493_c0	-
mes-miR156a	comp50301_c0	comp50301_c0	-
mes-miR156a	comp42032_c0	comp42032_c0	-
mes-miR156a	comp55321_c0	comp55321_c0	-
mes-miR156a	comp66906_c0	comp66906_c0	sp|Q5CCK4|VAL2_ARATH B3 domain-containing transcription repressor VAL2 OS=Arabidopsis thaliana GN=VAL2 PE=2 SV=1	GO:0005634(nucleus);GO:0003677(DNA binding);GO:0008270(zinc ion binding);GO:0010030(positive regulation of seed germination);GO:2000034(regulation of seed maturation);GO:0006355(regulation of transcription, DNA-dependent);GO:0006351(transcription, DNA-dependent)
mes-miR156a	comp2242_c0	comp2242_c0	-
mes-miR156a	comp67242_c0	comp67242_c0	-
mes-miR156a	comp53485_c0	comp53485_c0	-
mes-miR156a	comp66589_c0	comp66589_c0	-		ko00970(Aminoacyl-tRNA biosynthesis)
mes-miR156a	comp42156_c0	comp42156_c0	-
mes-miR156a	comp56020_c0	comp56020_c0	sp|P17411|CHBF_ECOLI 6-phospho-beta-glucosidase OS=Escherichia coli (strain K12) GN=chbF PE=1 SV=4	GO:0008706(6-phospho-beta-glucosidase activity);GO:0046872(metal ion binding);GO:0016616(oxidoreductase activity, acting on the CH-OH group of donors, NAD or NADP as acceptor);GO:0016052(carbohydrate catabolic process)
mes-miR156a	comp59095_c0	comp59095_c0	sp|Q941L0|CESA3_ARATH Cellulose synthase A catalytic subunit 3 [UDP-forming] OS=Arabidopsis thaliana GN=CESA3 PE=1 SV=2	GO:0005794(Golgi apparatus);GO:0016021(integral to membrane);GO:0005886(plasma membrane);GO:0009506(plasmodesma);GO:0016760(cellulose synthase );GO:0008270(zinc ion binding);GO:0007047(cellular cell wall organization);GO:0030244(cellulose biosynthetic process);GO:0006952(defense response);GO:0009833(primary cell wall biogenesis)
mes-miR156a	comp32350_c0	comp32350_c0	-
mes-miR156a	comp53199_c0	comp53199_c0	sp|Q9FKP0|PSRP6_ARATH 50S ribosomal protein 6, chloroplastic OS=Arabidopsis thaliana GN=PSRP6 PE=3 SV=1	GO:0009507(chloroplast);GO:0005840(ribosome);GO:0019843(rRNA binding);GO:0003735(structural constituent of ribosome);GO:0006412(translation)
mes-miR156a	comp56814_c0	comp56814_c0	-
mes-miR156a	comp55709_c0	comp55709_c0	-
mes-miR156a	comp281321_c0	comp281321_c0	-
mes-miR156a	comp60311_c0	comp60311_c0	-
mes-miR156a	comp44546_c0	comp44546_c0	-
mes-miR156a	comp48807_c0	comp48807_c0	sp|Q96288|STO_ARATH Salt tolerance protein OS=Arabidopsis thaliana GN=STO PE=1 SV=1	GO:0005634(nucleus);GO:0005515(protein binding);GO:0008270(zinc ion binding);GO:0009640(photomorphogenesis);GO:0080167(response to karrikin);GO:0009651(response to salt stress)
mes-miR156a	comp68083_c0	comp68083_c0	sp|Q5ZKI2|DPH2_CHICK Diphthamide biosynthesis protein 2 OS=Gallus gallus GN=DPH2 PE=2 SV=1	GO:0005737(cytoplasm);GO:0017183(peptidyl-diphthamide biosynthetic process from peptidyl-histidine)
mes-miR156a	comp57250_c0	comp57250_c0	-
mes-miR156a	comp66982_c0	comp66982_c0	-
mes-miR156a	comp43247_c0	comp43247_c0	sp|Q9FJW4|NDUS4_ARATH NADH dehydrogenase [ubiquinone] iron-sulfur protein 4, mitochondrial OS=Arabidopsis thaliana GN=FRO1 PE=2 SV=1	GO:0005747(mitochondrial respiratory chain complex I);GO:0050897(cobalt ion binding);GO:0016651(oxidoreductase activity, acting on NADH or NADPH);GO:0009631(cold acclimation);GO:0022900(electron transport chain);GO:0006970(response to osmotic stress);GO:0006810(transport)	ko00190(Oxidative phosphorylation)
mes-miR156a	comp67043_c0	comp67043_c0	sp|P76464|YFAS_ECOLI Putative UPF0192 protein YfaS OS=Escherichia coli (strain K12) GN=yfaS PE=5 SV=2	GO:0004866(endopeptidase inhibitor activity);GO:0003935(GTP cyclohydrolase II activity)
mes-miR156a	comp50289_c0	comp50289_c0	-
mes-miR156a	comp68531_c0	comp68531_c0	sp|C4ZU97|ARNA_ECOBW Bifunctional polymyxin resistance protein ArnA OS=Escherichia coli (strain K12 / MC4100 / BW2952) GN=arnA PE=3 SV=1	GO:0050662(coenzyme binding);GO:0016742(hydroxymethyl-, formyl- and related transferase activity);GO:0008168(methyltransferase activity);GO:0016491(oxidoreductase activity);GO:0009245(lipid A biosynthetic process);GO:0046677(response to antibiotic)	ko00130(Ubiquinone and other terpenoid-quinone biosynthesis)
mes-miR156a	comp67758_c0	comp67758_c0	sp|P04825|AMPN_ECOLI Aminopeptidase N OS=Escherichia coli (strain K12) GN=pepN PE=1 SV=2	GO:0005886(plasma membrane);GO:0004177(aminopeptidase activity);GO:0008237(metallopeptidase activity);GO:0008270(zinc ion binding);GO:0006508(proteolysis)	ko00480(Glutathione metabolism)
mes-miR156a	comp44955_c0	comp44955_c0	-
mes-miR156a	comp32895_c0	comp32895_c0	sp|Q8GW61|STP14_ARATH Sugar transport protein 14 OS=Arabidopsis thaliana GN=STP14 PE=2 SV=2	GO:0016021(integral to membrane);GO:0005886(plasma membrane);GO:0005354(galactose transmembrane transporter activity);GO:0015293(symporter activity)
mes-miR156a	comp514966_c0	comp514966_c0	-
mes-miR156a	comp962002_c0	comp962002_c0	-
mes-miR156a	comp35717_c0	comp35717_c0	-
mes-miR156a	comp660179_c0	comp660179_c0	sp|Q93WU9|WRK51_ARATH Probable WRKY transcription factor 51 OS=Arabidopsis thaliana GN=WRKY51 PE=2 SV=1	GO:0005634(nucleus);GO:0043565(sequence-specific DNA binding);GO:0003700(sequence-specific DNA binding transcription factor activity);GO:0042742(defense response to bacterium);GO:0050832(defense response to fungus);GO:0009867(jasmonic acid mediated signaling pathway)
mes-miR156a	comp68556_c0	comp68556_c0	sp|P31434|XYLS_ECOLI Alpha-xylosidase OS=Escherichia coli (strain K12) GN=yicI PE=1 SV=2	GO:0030246(carbohydrate binding);GO:0004553(hydrolase activity, hydrolyzing O-glycosyl compounds);GO:0005975(carbohydrate metabolic process)	ko03440(Homologous recombination)
mes-miR156a	comp18374_c0	comp18374_c0	-
mes-miR156a	comp40568_c0	comp40568_c0	-
mes-miR156a	comp88286_c0	comp88286_c0	sp|O22342|ADT1_GOSHI ADP,ATP carrier protein 1, mitochondrial OS=Gossypium hirsutum GN=ANT1 PE=2 SV=1	GO:0016021(integral to membrane);GO:0005743(mitochondrial inner membrane);GO:0005488(binding);GO:0005215(transporter activity);GO:0055085(transmembrane transport)	ko04020(Calcium signaling pathway)
mes-miR156a	comp54218_c0	comp54218_c0	sp|Q76NU3|TCPZ_DICDI T-complex protein 1 subunit zeta OS=Dictyostelium discoideum GN=cct6 PE=1 SV=1	GO:0005832(chaperonin-containing T-complex);GO:0045335(phagocytic vesicle);GO:0005524(ATP binding);GO:0051082(unfolded protein binding);GO:0006457(protein folding)
mes-miR156a	comp40452_c0	comp40452_c0	-
mes-miR156a	comp30143_c1	comp30143_c1	-
mes-miR156a	comp68531_c0	comp68531_c0	sp|C4ZU97|ARNA_ECOBW Bifunctional polymyxin resistance protein ArnA OS=Escherichia coli (strain K12 / MC4100 / BW2952) GN=arnA PE=3 SV=1	GO:0050662(coenzyme binding);GO:0016742(hydroxymethyl-, formyl- and related transferase activity);GO:0008168(methyltransferase activity);GO:0016491(oxidoreductase activity);GO:0009245(lipid A biosynthetic process);GO:0046677(response to antibiotic)	ko00130(Ubiquinone and other terpenoid-quinone biosynthesis)
mes-miR156a	comp68538_c0	comp68538_c0	sp|P33345|MOLR_ECOLI Putative molybdate metabolism regulator OS=Escherichia coli (strain K12) GN=yehH PE=5 SV=1	GO:0016788(hydrolase activity, acting on ester bonds);GO:0006974(response to DNA damage stimulus)
mes-miR156a	comp96576_c0	comp96576_c0	-
mes-miR156a	comp254137_c0	comp254137_c0	-
mes-miR156a	comp40512_c0	comp40512_c0	-
mes-miR156a	comp246723_c0	comp246723_c0	-
mes-miR156a	comp45850_c0	comp45850_c0	-
mes-miR156a	comp28658_c0	comp28658_c0	-
mes-miR156a	comp68529_c0	comp68529_c0	sp|P43329|HRPA_ECOLI ATP-dependent RNA helicase HrpA OS=Escherichia coli (strain K12) GN=hrpA PE=3 SV=3	GO:0005524(ATP binding);GO:0008026(ATP-dependent helicase activity);GO:0003676(nucleic acid binding);GO:0006397(mRNA processing)	ko00010(Glycolysis / Gluconeogenesis);ko00030(Pentose phosphate pathway);ko00051(Fructose and mannose metabolism);ko00710(Carbon fixation in photosynthetic organisms)
mes-miR156a	comp37473_c0	comp37473_c0	sp|Q6EW39|PSBJ_NYMAL Photosystem II reaction center protein J OS=Nymphaea alba GN=psbJ PE=3 SV=1	GO:0009535(chloroplast thylakoid membrane);GO:0016021(integral to membrane);GO:0009539(photosystem II reaction center);GO:0015979(photosynthesis)	ko00195(Photosynthesis)
mes-miR156a	comp30266_c0	comp30266_c0	-
mes-miR156a	comp17688_c0	comp17688_c0	-
mes-miR156a	comp68465_c0	comp68465_c0	sp|P24171|DCP_ECOLI Peptidyl-dipeptidase dcp OS=Escherichia coli (strain K12) GN=dcp PE=1 SV=4	GO:0005737(cytoplasm);GO:0004180(carboxypeptidase activity);GO:0046872(metal ion binding);GO:0004222(metalloendopeptidase activity);GO:0006508(proteolysis)	ko00250(Alanine,ko aspartate and glutamate metabolism);ko00350(Tyrosine metabolism);ko00650(Butanoate metabolism)
mes-miR156a	comp56554_c0	comp56554_c0	-
mes-miR156a	comp48421_c0	comp48421_c0	-
mes-miR156a	comp1118852_c0	comp1118852_c0	-
mes-miR156a	comp67085_c0	comp67085_c0	sp|Q94F27|B3GTB_ARATH Probable beta-1,3-galactosyltransferase 11 OS=Arabidopsis thaliana GN=B3GALT11 PE=2 SV=1	GO:0000139(Golgi membrane);GO:0016021(integral to membrane);GO:0008378(galactosyltransferase activity);GO:0006486(protein glycosylation)
mes-miR156a	comp35088_c0	comp35088_c0	-
mes-miR156a	comp55009_c0	comp55009_c0	sp|Q9FIM9|CAMK4_ARATH CDPK-related kinase 4 OS=Arabidopsis thaliana GN=CRK4 PE=1 SV=1
mes-miR156a	comp56158_c0	comp56158_c0	-
mes-miR156a	comp58497_c0	comp58497_c0	sp|Q8LDI5|CXXS1_ARATH Thioredoxin-like protein CXXS1 OS=Arabidopsis thaliana GN=CXXS1 PE=2 SV=2	GO:0005829(cytosol);GO:0009055(electron carrier activity);GO:0003756(protein disulfide isomerase activity);GO:0015035(protein disulfide oxidoreductase activity);GO:0045454(cell redox homeostasis);GO:0006662(glycerol ether metabolic process);GO:0006467(protein thiol-disulfide exchange)
mes-miR156a	comp67557_c0	comp67557_c0	sp|P0ABJ0|CYOB_ECO57 Ubiquinol oxidase subunit 1 OS=Escherichia coli O157:H7 GN=cyoB PE=3 SV=1	GO:0016021(integral to membrane);GO:0005886(plasma membrane);GO:0070469(respiratory chain);GO:0004129(cytochrome-c oxidase activity);GO:0009055(electron carrier activity);GO:0020037(heme binding);GO:0016682(oxidoreductase activity, acting on diphenols and related substances as donors, oxygen as acceptor);GO:0009060(aerobic respiration);GO:0022900(electron transport chain)	ko00900(Terpenoid backbone biosynthesis)
mes-miR156a	comp59061_c0	comp59061_c0	-
mes-miR156a	comp573738_c0	comp573738_c0	-
mes-miR156a	comp27879_c0	comp27879_c0	-
mes-miR156a	comp43867_c0	comp43867_c0	-
mes-miR156a	comp645645_c0	comp645645_c0	-
mes-miR156a	comp359555_c0	comp359555_c0	-
mes-miR156a	comp54539_c0	comp54539_c0	-
mes-miR156a	comp515335_c0	comp515335_c0	-
mes-miR156a	comp49883_c0	comp49883_c0	-
mes-miR156a	comp125825_c0	comp125825_c0	-
mes-miR156a	comp54390_c0	comp54390_c0	-
mes-miR156a	comp49772_c0	comp49772_c0	sp|Q42877|RPB2_SOLLC DNA-directed RNA polymerase II subunit RPB2 OS=Solanum lycopersicum GN=RPB2 PE=2 SV=1	GO:0005634(nucleus);GO:0003677(DNA binding);GO:0003899(DNA-directed RNA polymerase activity);GO:0046872(metal ion binding);GO:0032549(ribonucleoside binding)	ko00230(Purine metabolism);ko00240(Pyrimidine metabolism);ko03020(RNA polymerase)
mes-miR156a	comp31538_c0	comp31538_c0	-
mes-miR156a	comp58604_c0	comp58604_c0	-
mes-miR156a	comp623659_c0	comp623659_c0	-
mes-miR156a	comp549127_c0	comp549127_c0	-
mes-miR156a	comp375_c0	comp375_c0	sp|Q9SZ83|Y4967_ARATH Uncharacterized oxidoreductase At4g09670 OS=Arabidopsis thaliana GN=At4g09670 PE=1 SV=1	GO:0005829(cytosol);GO:0005488(binding);GO:0016491(oxidoreductase activity)
mes-miR156a	comp59888_c0	comp59888_c0	-
mes-miR156a	comp859207_c0	comp859207_c0	-
mes-miR156a	comp64007_c0	comp64007_c0	sp|C4ZXE9|SYGB_ECOBW Glycine--tRNA ligase beta subunit OS=Escherichia coli (strain K12 / MC4100 / BW2952) GN=glyS PE=3 SV=1	GO:0005737(cytoplasm);GO:0004814(arginine-tRNA ligase activity);GO:0005524(ATP binding);GO:0004820(glycine-tRNA ligase activity);GO:0006420(arginyl-tRNA aminoacylation);GO:0006426(glycyl-tRNA aminoacylation)	ko00970(Aminoacyl-tRNA biosynthesis)
mes-miR156a	comp3354_c0	comp3354_c0	-
mes-miR156a	comp50289_c0	comp50289_c0	-
mes-miR156a	comp36143_c0	comp36143_c0	sp|Q40161|GP1_SOLLC Polygalacturonase-1 non-catalytic subunit beta OS=Solanum lycopersicum GN=GP1 PE=1 SV=1	GO:0048046(apoplast);GO:0005618(cell wall);GO:0007047(cellular cell wall organization);GO:0009835(ripening)
mes-miR156a	comp35339_c0	comp35339_c0	-
mes-miR156a	comp44013_c0	comp44013_c0	-
mes-miR156a	comp402209_c0	comp402209_c0	-
mes-miR156a	comp541077_c0	comp541077_c0	-
mes-miR156a	comp224335_c0	comp224335_c0	-
mes-miR156a	comp65753_c0	comp65753_c0	sp|P08201|NIRB_ECOLI Nitrite reductase [NAD(P)H] large subunit OS=Escherichia coli (strain K12) GN=nirB PE=3 SV=4	GO:0009344(nitrite reductase complex [NAD);GO:0051539(4 iron, 4 sulfur cluster binding);GO:0050660(flavin adenine dinucleotide binding);GO:0020037(heme binding);GO:0050661(NADP binding);GO:0008942(nitrite reductase [NAD);GO:0009061(anaerobic respiration);GO:0042128(nitrate assimilation)	ko00860(Porphyrin and chlorophyll metabolism)
mes-miR156a	comp39534_c0	comp39534_c0	sp|Q9FGL0|WTR44_ARATH WAT1-related protein At5g47470 OS=Arabidopsis thaliana GN=At5g47470 PE=3 SV=1
mes-miR156a	comp131530_c0	comp131530_c0	sp|Q944A6|SNF4_ARATH Sucrose nonfermenting 4-like protein OS=Arabidopsis thaliana GN=SNF4 PE=1 SV=1	GO:0005737(cytoplasm);GO:0005634(nucleus);GO:0005515(protein binding);GO:0004674(protein serine/threonine kinase activity);GO:0005975(carbohydrate metabolic process);GO:0042149(cellular response to glucose starvation);GO:0046777(protein autophosphorylation)
mes-miR156a	comp39853_c0	comp39853_c0	-
mes-miR156a	comp48199_c0	comp48199_c0	sp|Q9SR93|LMBD1_ARATH LIMR family protein At3g08930 OS=Arabidopsis thaliana GN=At3g08930 PE=2 SV=2	GO:0016021(integral to membrane);GO:0009506(plasmodesma)
mes-miR156a	comp21975_c0	comp21975_c0	sp|O82663|DHSA1_ARATH Succinate dehydrogenase [ubiquinone] flavoprotein subunit 1, mitochondrial OS=Arabidopsis thaliana GN=SDH1-1 PE=1 SV=1	GO:0005618(cell wall);GO:0005743(mitochondrial inner membrane);GO:0005524(ATP binding);GO:0050897(cobalt ion binding);GO:0009055(electron carrier activity);GO:0050660(flavin adenine dinucleotide binding);GO:0008177(succinate dehydrogenase );GO:0006121(mitochondrial electron transport, succinate to ubiquinone);GO:0006810(transport);GO:0006099(tricarboxylic acid cycle)	ko00020(Citrate cycle );ko00190(Oxidative phosphorylation)
mes-miR156a	comp50353_c0	comp50353_c0	sp|P77804|YDGA_ECOLI Protein YdgA OS=Escherichia coli (strain K12) GN=ydgA PE=1 SV=1	GO:0005886(plasma membrane);GO:0042802(identical protein binding);GO:0006928(cellular component movement)	ko00020(Citrate cycle );ko00720(Reductive carboxylate cycle )
mes-miR156a	comp57625_c0	comp57625_c0	sp|Q6Z8K4|MUB3_ORYSJ Membrane-anchored ubiquitin-fold protein 3 OS=Oryza sativa subsp. japonica GN=MUB3 PE=2 SV=1	GO:0005886(plasma membrane)
mes-miR156a	comp52307_c0	comp52307_c0	-
mes-miR156a	comp61643_c0	comp61643_c0	sp|C4ZXQ7|ADEC_ECOBW Adenine deaminase OS=Escherichia coli (strain K12 / MC4100 / BW2952) GN=ade PE=3 SV=1	GO:0000034(adenine deaminase activity);GO:0006146(adenine catabolic process)	ko00290(Valine,ko leucine and isoleucine biosynthesis);ko00650(Butanoate metabolism);ko00660(C5-Branched dibasic acid metabolism);ko00770(Pantothenate and CoA biosynthesis)
mes-miR156a	comp62737_c0	comp62737_c0	-
mes-miR156a	comp59034_c0	comp59034_c0	sp|Q6R567|RMA1_CAPAN E3 ubiquitin-protein ligase RMA1H1 OS=Capsicum annuum GN=RMA1H1 PE=1 SV=1	GO:0005789(endoplasmic reticulum membrane);GO:0016021(integral to membrane);GO:0004842(ubiquitin-protein ligase activity);GO:0008270(zinc ion binding);GO:0043161(proteasomal ubiquitin-dependent protein catabolic process);GO:0009409(response to cold);GO:0009723(response to ethylene stimulus);GO:0006970(response to osmotic stress);GO:0009414(response to water deprivation);GO:0009611(response to wou…
mes-miR156a	comp32766_c0	comp32766_c0	-
mes-miR156a	comp31193_c0	comp31193_c0	sp|Q5ZIJ0|BUD13_CHICK BUD13 homolog OS=Gallus gallus GN=BUD13 PE=2 SV=1
mes-miR156a	comp68296_c1	comp68296_c1	sp|P76585|YPHG_ECOLI Uncharacterized protein YphG OS=Escherichia coli (strain K12) GN=yphG PE=4 SV=2	GO:0005488(binding)	ko02010(ABC transporters)
mes-miR156a	comp65971_c0	comp65971_c0	sp|Q9FNQ2|E13L2_ARATH Glucan endo-1,3-beta-glucosidase-like protein 2 OS=Arabidopsis thaliana GN=At5g61130 PE=1 SV=1	GO:0046658(anchored to plasma membrane);GO:0009505(plant-type cell wall);GO:0009506(plasmodesma);GO:0080087(callose binding);GO:0052543(callose deposition in cell wall)
mes-miR156a	comp45109_c0	comp45109_c0	-
mes-miR156a	comp60435_c0	comp60435_c0	-
mes-miR156a	comp583_c0	comp583_c0	-
mes-miR156a	comp68262_c1	comp68262_c1	-		ko04144(Endocytosis)
mes-miR156a	comp64373_c0	comp64373_c0	sp|Q9SUC0|3HIDH_ARATH Probable 3-hydroxyisobutyrate dehydrogenase, mitochondrial OS=Arabidopsis thaliana GN=At4g20930 PE=2 SV=3	GO:0005739(mitochondrion);GO:0008442(3-hydroxyisobutyrate dehydrogenase activity);GO:0051287(NAD binding);GO:0004616(phosphogluconate dehydrogenase );GO:0006098(pentose-phosphate shunt);GO:0006573(valine metabolic process)	ko00280(Valine,ko leucine and isoleucine degradation)
mes-miR156a	comp488187_c0	comp488187_c0	sp|Q3ECM4|GDL25_ARATH GDSL esterase/lipase At1g58725 OS=Arabidopsis thaliana GN=At1g58725 PE=2 SV=2	GO:0005576(extracellular region);GO:0016298(lipase activity);GO:0016042(lipid catabolic process)
mes-miR156a	comp65424_c0	comp65424_c0	sp|Q67XC9|TPPD_ARATH Probable trehalose-phosphate phosphatase D OS=Arabidopsis thaliana GN=TPPD PE=2 SV=1		ko00500(Starch and sucrose metabolism)
mes-miR156a	comp52867_c0	comp52867_c0	-
mes-miR156a	comp431858_c0	comp431858_c0	sp|O64697|C7101_ARATH Cytochrome P450 710A1 OS=Arabidopsis thaliana GN=CYP710A1 PE=1 SV=1	GO:0016021(integral to membrane);GO:0000249(C-22 sterol desaturase activity);GO:0009055(electron carrier activity);GO:0020037(heme binding);GO:0004497(monooxygenase activity);GO:0016126(sterol biosynthetic process)	ko00361(gamma-Hexachlorocyclohexane degradation);ko00626(Naphthalene and anthracene degradation);ko00903(Limonene and pinene degradation);ko00945(Stilbenoid,ko diarylheptanoid and gingerol biosynthesis)
mes-miR156a	comp55789_c0	comp55789_c0	-
mes-miR156a	comp63354_c0	comp63354_c0	sp|P36683|ACON2_ECOLI Aconitate hydratase 2 OS=Escherichia coli (strain K12) GN=acnB PE=1 SV=3	GO:0047456(2-methylisocitrate dehydratase activity);GO:0051539(4 iron, 4 sulfur cluster binding);GO:0003994(aconitate hydratase activity);GO:0052632(citrate hydro-lyase );GO:0052633(isocitrate hydro-lyase );GO:0046872(metal ion binding);GO:0003730(mRNA 3'-UTR binding);GO:0019629(propionate catabolic process, 2-methylcitrate cycle);GO:0006417(regulation of translation);GO:0006099(tricarboxylic aci…	ko00020(Citrate cycle );ko00630(Glyoxylate and dicarboxylate metabolism);ko00720(Reductive carboxylate cycle )
mes-miR156a	comp17639_c0	comp17639_c0	sp|Q4FE45|XB33_ARATH E3 ubiquitin-protein ligase XBAT33 OS=Arabidopsis thaliana GN=XBAT33 PE=2 SV=1	GO:0004842(ubiquitin-protein ligase activity);GO:0008270(zinc ion binding)
mes-miR156a	comp4833_c0	comp4833_c0	sp|Q9SXA1|P4KA1_ARATH Phosphatidylinositol 4-kinase alpha OS=Arabidopsis thaliana GN=PI4KALPHA1 PE=1 SV=2	GO:0016020(membrane);GO:0048471(perinuclear region of cytoplasm);GO:0004430(1-phosphatidylinositol 4-kinase activity);GO:0051015(actin filament binding);GO:0070300(phosphatidic acid binding);GO:0005546(phosphatidylinositol-4,5-bisphosphate binding);GO:0070273(phosphatidylinositol-4-phosphate binding);GO:0048015(phosphatidylinositol-mediated signaling)	ko00562(Inositol phosphate metabolism);ko04070(Phosphatidylinositol signaling system)
mes-miR156a	comp62797_c0	comp62797_c0	sp|Q9LN71|RING1_ARATH E3 ubiquitin-protein ligase At1g12760 OS=Arabidopsis thaliana GN=At1g12760 PE=2 SV=1	GO:0016021(integral to membrane);GO:0004842(ubiquitin-protein ligase activity);GO:0008270(zinc ion binding)
mes-miR156a	comp64802_c0	comp64802_c0	sp|P30130|FIMD_ECOLI Outer membrane usher protein FimD OS=Escherichia coli (strain K12) GN=fimD PE=1 SV=2	GO:0009279(cell outer membrane);GO:0016021(integral to membrane);GO:0005886(plasma membrane);GO:0005215(transporter activity)
mes-miR156a	comp227530_c0	comp227530_c0	sp|P14891|HMDH1_ARATH 3-hydroxy-3-methylglutaryl-coenzyme A reductase 1 OS=Arabidopsis thaliana GN=HMG1 PE=1 SV=1	GO:0005789(endoplasmic reticulum membrane);GO:0016021(integral to membrane);GO:0004420(hydroxymethylglutaryl-CoA reductase );GO:0042282(hydroxymethylglutaryl-CoA reductase activity);GO:0050661(NADP binding);GO:0005515(protein binding);GO:0015936(coenzyme A metabolic process);GO:0019287(isopentenyl diphosphate biosynthetic process, mevalonate pathway);GO:0016126(sterol biosynthetic process)	ko00900(Terpenoid backbone biosynthesis)
mes-miR156a	comp574615_c0	comp574615_c0	-
mes-miR156a	comp65759_c0	comp65759_c0	sp|Q43125|CRY1_ARATH Cryptochrome-1 OS=Arabidopsis thaliana GN=CRY1 PE=1 SV=2	GO:0005737(cytoplasm);GO:0005634(nucleus);GO:0005524(ATP binding);GO:0009882(blue light photoreceptor activity);GO:0003913(DNA photolyase activity);GO:0042803(protein homodimerization activity);GO:0004672(protein kinase activity);GO:0046283(anthocyanin metabolic process);GO:0010617(circadian regulation of calcium ion oscillation);GO:0009583(detection of light stimulus);GO:0006281(DNA repair);GO:0…	ko04712(Circadian rhythm - plant)
mes-miR156a	comp29710_c0	comp29710_c0	-
mes-miR156a	comp63603_c0	comp63603_c0	-
mes-miR156a	comp59252_c0	comp59252_c0	sp|Q8GYH8|SUT42_ARATH Probable sulfate transporter 4.2 OS=Arabidopsis thaliana GN=SULTR4;2 PE=2 SV=2	GO:0016021(integral to membrane);GO:0008271(secondary active sulfate transmembrane transporter activity);GO:0015293(symporter activity)
mes-miR156a	comp63612_c0	comp63612_c0	sp|Q9SS90|RGLG1_ARATH E3 ubiquitin-protein ligase RGLG1 OS=Arabidopsis thaliana GN=RGLG1 PE=1 SV=1	GO:0005886(plasma membrane);GO:0016874(ligase activity);GO:0008270(zinc ion binding);GO:0009850(auxin metabolic process);GO:0009690(cytokinin metabolic process)
mes-miR156a	comp482279_c0	comp482279_c0	-
mes-miR156a	comp63784_c0	comp63784_c0	sp|P45546|YHFT_ECOLI Uncharacterized protein YhfT OS=Escherichia coli (strain K12) GN=yhfT PE=4 SV=2	GO:0016021(integral to membrane);GO:0005886(plasma membrane)
mes-miR156a	comp31973_c0	comp31973_c0	sp|Q9FHW7|SKP1B_ARATH SKP1-like protein 1B OS=Arabidopsis thaliana GN=SKP1B PE=1 SV=1	GO:0005634(nucleus);GO:0005515(protein binding);GO:0009734(auxin mediated signaling pathway);GO:0007059(chromosome segregation);GO:0009793(embryo development ending in seed dormancy);GO:0009873(ethylene mediated signaling pathway);GO:0044419(interspecies interaction between organisms);GO:0006511(ubiquitin-dependent protein catabolic process)	ko04110(Cell cycle);ko04114(Oocyte meiosis);ko04120(Ubiquitin mediated proteolysis);ko04310(Wnt signaling pathway);ko04350(TGF-beta signaling pathway)
mes-miR156a	comp313010_c0	comp313010_c0	sp|Q05966|GRP10_BRANA Glycine-rich RNA-binding protein 10 OS=Brassica napus GN=GRP10 PE=1 SV=1	GO:0000166(nucleotide binding);GO:0003723(RNA binding)
mes-miR156a	comp62735_c0	comp62735_c0	sp|P45537|YHFK_ECOLI Uncharacterized protein YhfK OS=Escherichia coli (strain K12) GN=yhfK PE=3 SV=2	GO:0016021(integral to membrane);GO:0005886(plasma membrane);GO:0006810(transport)
mes-miR156a	comp50197_c0	comp50197_c0	-
mes-miR156a	comp46140_c0	comp46140_c0	-
mes-miR156a	comp61736_c0	comp61736_c0	sp|A7WM73|HEXO1_ARATH Beta-hexosaminidase 1 OS=Arabidopsis thaliana GN=HEXO1 PE=1 SV=1		ko00511(Other glycan degradation);ko00520(Amino sugar and nucleotide sugar metabolism);ko00531(Glycosaminoglycan degradation);ko00603(Glycosphingolipid biosynthesis - globo series);ko00604(Glycosphingolipid biosynthesis - ganglio series);ko04142(Lysosome)
mes-miR156a	comp5828_c0	comp5828_c0	-
mes-miR156a	comp61758_c1	comp61758_c1	-
mes-miR156a	comp53921_c0	comp53921_c0	sp|Q9FWA4|GAUT9_ARATH Probable galacturonosyltransferase 9 OS=Arabidopsis thaliana GN=GAUT9 PE=2 SV=1	GO:0000139(Golgi membrane);GO:0016021(integral to membrane);GO:0016757(transferase activity, transferring glycosyl groups)	ko00051(Fructose and mannose metabolism)
mes-miR156a	comp68209_c0	comp68209_c0	-
mes-miR156a	comp53137_c0	comp53137_c0	-
mes-miR156a	comp59203_c0	comp59203_c0	sp|P30222|HS22C_PETHY Small heat shock protein, chloroplastic OS=Petunia hybrida GN=HSP22 PE=2 SV=1	GO:0009507(chloroplast);GO:0006950(response to stress)
mes-miR156a	comp55543_c0	comp55543_c0	sp|Q8VZJ9|CRCK2_ARATH Calmodulin-binding receptor-like cytoplasmic kinase 2 OS=Arabidopsis thaliana GN=CRCK2 PE=2 SV=1	GO:0016021(integral to membrane);GO:0005886(plasma membrane);GO:0005524(ATP binding);GO:0004674(protein serine/threonine kinase activity);GO:0009555(pollen development)	ko04210(Apoptosis);ko04620(Toll-like receptor signaling pathway);ko04722(Neurotrophin signaling pathway)
mes-miR156a	comp31227_c0	comp31227_c0	-
mes-miR156a	comp44569_c0	comp44569_c0	-
mes-miR156a	comp656686_c0	comp656686_c0	-
mes-miR156a	comp63883_c0	comp63883_c0	sp|P39160|UXUB_ECOLI D-mannonate oxidoreductase OS=Escherichia coli (strain K12) GN=uxuB PE=3 SV=1	GO:0050662(coenzyme binding);GO:0008866(fructuronate reductase activity);GO:0008926(mannitol-1-phosphate 5-dehydrogenase activity);GO:0042840(D-glucuronate catabolic process)
mes-miR156a	comp63767_c0	comp63767_c0	sp|Q9FZ95|PUP3_ARATH Purine permease 3 OS=Arabidopsis thaliana GN=PUP3 PE=2 SV=1	GO:0016021(integral to membrane);GO:0005345(purine base transmembrane transporter activity)
mes-miR156a	comp41879_c0	comp41879_c0	-
mes-miR156a	comp68157_c0	comp68157_c0	sp|Q7KZF4|SND1_HUMAN Staphylococcal nuclease domain-containing protein 1 OS=Homo sapiens GN=SND1 PE=1 SV=1	GO:0042470(melanosome);GO:0005634(nucleus);GO:0016442(RNA-induced silencing complex);GO:0004518(nuclease activity);GO:0003676(nucleic acid binding);GO:0003712(transcription cofactor activity);GO:0031047(gene silencing by RNA);GO:0044419(interspecies interaction between organisms);GO:0006355(regulation of transcription, DNA-dependent);GO:0006351(transcription, DNA-dependent)
mes-miR156a	comp67370_c0	comp67370_c0	sp|Q9ZUU1|KADC1_ARATH Probable adenylate kinase 1, chloroplastic OS=Arabidopsis thaliana GN=At2g37250 PE=2 SV=1	GO:0009570(chloroplast stroma);GO:0005634(nucleus);GO:0004017(adenylate kinase activity);GO:0005524(ATP binding);GO:0008652(cellular amino acid biosynthetic process);GO:0048364(root development);GO:0048367(shoot development)	ko00230(Purine metabolism)
mes-miR156a	comp67490_c0	comp67490_c0	sp|Q40742|RAD23_ORYSJ Probable DNA repair protein RAD23 OS=Oryza sativa subsp. japonica GN=RAD23 PE=1 SV=2	GO:0005634(nucleus);GO:0003684(damaged DNA binding);GO:0006289(nucleotide-excision repair);GO:0043161(proteasomal ubiquitin-dependent protein catabolic process)	ko03420(Nucleotide excision repair)
mes-miR156a	comp63653_c0	comp63653_c0	-
mes-miR156a	comp68307_c0	comp68307_c0	sp|Q9ZV48|TPS11_ARATH Probable alpha,alpha-trehalose-phosphate synthase [UDP-forming] 11 OS=Arabidopsis thaliana GN=TPS11 PE=2 SV=1	GO:0005829(cytosol);GO:0005739(mitochondrion);GO:0003825(alpha,alpha-trehalose-phosphate synthase );GO:0005992(trehalose biosynthetic process)	ko00500(Starch and sucrose metabolism)
mes-miR156a	comp26389_c0	comp26389_c0	-
mes-miR156a	comp59432_c0	comp59432_c0	-
mes-miR156a	comp51697_c0	comp51697_c0	-
mes-miR156a	comp54777_c0	comp54777_c0	-
mes-miR156a	comp32766_c0	comp32766_c0	-
mes-miR156a	comp41711_c0	comp41711_c0	-
mes-miR156a	comp53121_c0	comp53121_c0	-
mes-miR156a	comp633572_c0	comp633572_c0	-
mes-miR156a	comp53097_c0	comp53097_c0	-
mes-miR156a	comp50565_c0	comp50565_c0	-
mes-miR156a	comp68551_c0	comp68551_c0	sp|P0A9Q8|ADHE_ECO57 Aldehyde-alcohol dehydrogenase OS=Escherichia coli O157:H7 GN=adhE PE=3 SV=2	GO:0008774(acetaldehyde dehydrogenase );GO:0004022(alcohol dehydrogenase );GO:0046872(metal ion binding);GO:0006066(alcohol metabolic process);GO:0015976(carbon utilization)	ko04626(Plant-pathogen interaction)
mes-miR156a	comp3892_c0	comp3892_c0	sp|F4JGP4|ATK5_ARATH Kinesin-5 OS=Arabidopsis thaliana GN=ATK5 PE=2 SV=1
mes-miR156a	comp959785_c0	comp959785_c0	-
mes-miR156a	comp33586_c0	comp33586_c0	-
mes-miR156a	comp40601_c0	comp40601_c0	-
mes-miR156a	comp505238_c0	comp505238_c0	-
mes-miR156a	comp47151_c0	comp47151_c0	-
mes-miR156a	comp466068_c0	comp466068_c0	-
mes-miR156a	comp24725_c0	comp24725_c0	-
mes-miR156a	comp1289015_c0	comp1289015_c0	-
mes-miR156a	comp67043_c0	comp67043_c0	sp|P76464|YFAS_ECOLI Putative UPF0192 protein YfaS OS=Escherichia coli (strain K12) GN=yfaS PE=5 SV=2	GO:0004866(endopeptidase inhibitor activity);GO:0003935(GTP cyclohydrolase II activity)
mes-miR156a	comp68544_c0	comp68544_c0	sp|P28629|ADIA_ECOLI Biodegradative arginine decarboxylase OS=Escherichia coli (strain K12) GN=adiA PE=1 SV=1	GO:0005829(cytosol);GO:0008792(arginine decarboxylase activity);GO:0030170(pyridoxal phosphate binding);GO:0006520(cellular amino acid metabolic process);GO:0051454(intracellular pH elevation);GO:0001101(response to acid)	ko00020(Citrate cycle );ko00720(Reductive carboxylate cycle )
mes-miR156a	comp32842_c0	comp32842_c0	-
mes-miR156a	comp49048_c0	comp49048_c0	-
mes-miR156a	comp68423_c0	comp68423_c0	sp|P46474|YHDP_ECOLI Uncharacterized protein YhdP OS=Escherichia coli (strain K12) GN=yhdP PE=4 SV=4		ko00280(Valine,ko leucine and isoleucine degradation)
mes-miR156a	comp68474_c0	comp68474_c0	sp|P09980|REP_ECOLI ATP-dependent DNA helicase rep OS=Escherichia coli (strain K12) GN=rep PE=1 SV=3	GO:0005737(cytoplasm);GO:0005524(ATP binding);GO:0004003(ATP-dependent DNA helicase activity);GO:0003677(DNA binding);GO:0006281(DNA repair);GO:0006268(DNA unwinding involved in replication)	ko00260(Glycine,ko serine and threonine metabolism);ko00290(Valine,ko leucine and isoleucine biosynthesis)
mes-miR156a	comp48912_c0	comp48912_c0	-
mes-miR156a	comp68524_c0	comp68524_c0	sp|P75793|PFLF_ECOLI Putative formate acetyltransferase 3 OS=Escherichia coli (strain K12) GN=ybiW PE=3 SV=1	GO:0005737(cytoplasm);GO:0008861(formate C-acetyltransferase activity);GO:0006006(glucose metabolic process)	ko00250(Alanine,ko aspartate and glutamate metabolism);ko00460(Cyanoamino acid metabolism);ko00910(Nitrogen metabolism)
mes-miR156a	comp62804_c0	comp62804_c0	sp|O65268|TASP1_ARATH Putative threonine aspartase OS=Arabidopsis thaliana GN=At4g00590 PE=2 SV=3	GO:0008798(beta-aspartyl-peptidase activity)
mes-miR156a	comp42057_c0	comp42057_c0	-
mes-miR156a	comp68490_c0	comp68490_c0	sp|Q8XCX2|NUOG_ECO57 NADH-quinone oxidoreductase subunit G OS=Escherichia coli O157:H7 GN=nuoG PE=3 SV=3	GO:0016020(membrane);GO:0051537(2 iron, 2 sulfur cluster binding);GO:0051539(4 iron, 4 sulfur cluster binding);GO:0009055(electron carrier activity);GO:0030151(molybdenum ion binding);GO:0008137(NADH dehydrogenase );GO:0048038(quinone binding);GO:0042773(ATP synthesis coupled electron transport)	ko00230(Purine metabolism);ko00250(Alanine,ko aspartate and glutamate metabolism)
mes-miR156a	comp98242_c0	comp98242_c0	-
mes-miR156a	comp67554_c0	comp67554_c0	sp|P21513|RNE_ECOLI Ribonuclease E OS=Escherichia coli (strain K12) GN=rne PE=1 SV=6	GO:0005737(cytoplasm);GO:0004519(endonuclease activity);GO:0005515(protein binding);GO:0004540(ribonuclease activity);GO:0003723(RNA binding);GO:0006401(RNA catabolic process);GO:0006396(RNA processing)	ko00061(Fatty acid biosynthesis)
mes-miR156a	comp114889_c0	comp114889_c0	-
mes-miR156a	comp255432_c0	comp255432_c0	-
mes-miR156a	comp44259_c0	comp44259_c0	sp|O82804|ELF3_ARATH Protein EARLY FLOWERING 3 OS=Arabidopsis thaliana GN=ELF3 PE=1 SV=1	GO:0005634(nucleus);GO:0008022(protein C-terminus binding);GO:0007623(circadian rhythm);GO:0010031(circumnutation);GO:0048573(photoperiodism, flowering);GO:0009585(red, far-red light phototransduction);GO:0009909(regulation of flower development);GO:0010119(regulation of stomatal movement);GO:0006355(regulation of transcription, DNA-dependent);GO:0009737(response to abscisic acid stimulus);GO:000…	ko04712(Circadian rhythm - plant)
mes-miR156a	comp68127_c0	comp68127_c0	sp|P63285|CLPB_ECO57 Chaperone protein ClpB OS=Escherichia coli O157:H7 GN=clpB PE=3 SV=1	GO:0005737(cytoplasm);GO:0005524(ATP binding);GO:0017111(nucleoside-triphosphatase activity);GO:0016485(protein processing);GO:0009408(response to heat)
mes-miR156a	comp16256_c0	comp16256_c0	-
mes-miR156a	comp56946_c0	comp56946_c0	sp|Q9SCL7|NAGK_ARATH Acetylglutamate kinase, chloroplastic OS=Arabidopsis thaliana GN=NAGK PE=1 SV=1	GO:0009570(chloroplast stroma);GO:0003991(acetylglutamate kinase activity);GO:0034618(arginine binding);GO:0005524(ATP binding);GO:0004349(glutamate 5-kinase activity);GO:0005515(protein binding);GO:0042450(arginine biosynthetic process via ornithine);GO:0006561(proline biosynthetic process)	ko00330(Arginine and proline metabolism)
mes-miR156a	comp10671_c0	comp10671_c0	-
mes-miR156a	comp49191_c0	comp49191_c0	-
mes-miR156a	comp58146_c0	comp58146_c0	sp|Q9SSQ4|FRS6_ARATH Protein FAR1-RELATED SEQUENCE 6 OS=Arabidopsis thaliana GN=FRS6 PE=2 SV=1	GO:0005634(nucleus);GO:0008270(zinc ion binding)
mes-miR156a	comp55689_c0	comp55689_c0	-
mes-miR156a	comp415264_c0	comp415264_c0	-
mes-miR156a	comp67279_c0	comp67279_c0	sp|C4ZXE9|SYGB_ECOBW Glycine--tRNA ligase beta subunit OS=Escherichia coli (strain K12 / MC4100 / BW2952) GN=glyS PE=3 SV=1	GO:0005737(cytoplasm);GO:0004814(arginine-tRNA ligase activity);GO:0005524(ATP binding);GO:0004820(glycine-tRNA ligase activity);GO:0006420(arginyl-tRNA aminoacylation);GO:0006426(glycyl-tRNA aminoacylation)	ko00970(Aminoacyl-tRNA biosynthesis)
mes-miR156a	comp583258_c0	comp583258_c0	sp|B2VDG5|RLMI_ERWT9 Ribosomal RNA large subunit methyltransferase I OS=Erwinia tasmaniensis (strain DSM 17950 / Et1/99) GN=rlmI PE=3 SV=1	GO:0005737(cytoplasm);GO:0003723(RNA binding);GO:0008649(rRNA methyltransferase activity)
mes-miR156a	comp28941_c0	comp28941_c0	-
mes-miR156a	comp52580_c0	comp52580_c0	sp|O64380|PABP3_ARATH Polyadenylate-binding protein 3 OS=Arabidopsis thaliana GN=PAB3 PE=2 SV=1	GO:0000166(nucleotide binding);GO:0003723(RNA binding)
mes-miR156a	comp285935_c0	comp285935_c0	-
mes-miR156a	comp67991_c3	comp67991_c3	sp|Q03666|GSTX4_TOBAC Probable glutathione S-transferase OS=Nicotiana tabacum PE=2 SV=1	GO:0004364(glutathione transferase activity);GO:0009734(auxin mediated signaling pathway)	ko00480(Glutathione metabolism);ko00980(Metabolism of xenobiotics by cytochrome P450);ko00982(Drug metabolism - cytochrome P450)
mes-miR156a	comp56087_c0	comp56087_c0	-
mes-miR156a	comp53959_c0	comp53959_c0	-
mes-miR156a	comp41383_c0	comp41383_c0	sp|P51413|RL172_ARATH 60S ribosomal protein L17-2 OS=Arabidopsis thaliana GN=RPL17B PE=2 SV=2	GO:0022625(cytosolic large ribosomal subunit);GO:0016020(membrane);GO:0005730(nucleolus);GO:0009506(plasmodesma);GO:0005773(vacuole);GO:0003735(structural constituent of ribosome);GO:0006412(translation)	ko03010(Ribosome)
mes-miR156a	comp47156_c0	comp47156_c0	sp|Q6RVV4|TIC32_PEA Short-chain dehydrogenase TIC 32, chloroplastic OS=Pisum sativum GN=TIC32 PE=1 SV=1	GO:0005488(binding);GO:0016491(oxidoreductase activity)
mes-miR156a	comp747968_c0	comp747968_c0	sp|Q8RY89|PI5K8_ARATH Phosphatidylinositol 4-phosphate 5-kinase 8 OS=Arabidopsis thaliana GN=PIP5K8 PE=2 SV=1	GO:0005886(plasma membrane);GO:0016308(1-phosphatidylinositol-4-phosphate 5-kinase activity);GO:0005524(ATP binding)	ko00562(Inositol phosphate metabolism);ko04070(Phosphatidylinositol signaling system);ko04144(Endocytosis);ko04666(Fc gamma R-mediated phagocytosis);ko04810(Regulation of actin cytoskeleton)
mes-miR156a	comp27329_c0	comp27329_c0	-
mes-miR156a	comp507378_c0	comp507378_c0	-
mes-miR156a	comp6486_c0	comp6486_c0	sp|Q9M9E0|LRKS1_ARATH L-type lectin-domain containing receptor kinase S.1 OS=Arabidopsis thaliana GN=LECRKS1 PE=1 SV=1	GO:0016021(integral to membrane);GO:0005886(plasma membrane);GO:0005773(vacuole);GO:0005524(ATP binding);GO:0004674(protein serine/threonine kinase activity);GO:0004872(receptor activity);GO:0005529(sugar binding)
mes-miR156a	comp218151_c0	comp218151_c0	-
mes-miR156a	comp552503_c0	comp552503_c0	-
mes-miR156a	comp67758_c0	comp67758_c0	sp|P04825|AMPN_ECOLI Aminopeptidase N OS=Escherichia coli (strain K12) GN=pepN PE=1 SV=2	GO:0005886(plasma membrane);GO:0004177(aminopeptidase activity);GO:0008237(metallopeptidase activity);GO:0008270(zinc ion binding);GO:0006508(proteolysis)	ko00480(Glutathione metabolism)
mes-miR156a	comp41180_c0	comp41180_c0	-
mes-miR156a	comp57774_c0	comp57774_c0	sp|Q38865|EXPA6_ARATH Expansin-A6 OS=Arabidopsis thaliana GN=EXPA6 PE=2 SV=2	GO:0005576(extracellular region);GO:0016020(membrane);GO:0009505(plant-type cell wall);GO:0009664(plant-type cell wall organization);GO:0006949(syncytium formation)
mes-miR156a	comp62664_c1	comp62664_c1	sp|Q9SYB5|OST3B_ARATH Probable dolichyl-diphosphooligosaccharide--protein glycosyltransferase subunit 3B OS=Arabidopsis thaliana GN=OST3B PE=2 SV=1
mes-miR156a	comp67772_c0	comp67772_c0	sp|P75750|YBGQ_ECOLI Uncharacterized outer membrane usher protein YbgQ OS=Escherichia coli (strain K12) GN=ybgQ PE=3 SV=2	GO:0009279(cell outer membrane);GO:0016021(integral to membrane);GO:0005886(plasma membrane);GO:0005215(transporter activity)	ko00020(Citrate cycle );ko00190(Oxidative phosphorylation)
mes-miR156a	comp66277_c0	comp66277_c0	sp|P0ADY2|PPID_ECOL6 Peptidyl-prolyl cis-trans isomerase D OS=Escherichia coli O6:H1 (strain CFT073 / ATCC 700928 / UPEC) GN=ppiD PE=3 SV=1	GO:0016021(integral to membrane);GO:0005886(plasma membrane);GO:0003755(peptidyl-prolyl cis-trans isomerase activity);GO:0006457(protein folding);GO:0015031(protein transport);GO:0006950(response to stress)	ko02010(ABC transporters)
mes-miR156a	comp7512_c0	comp7512_c0	sp|Q9SGG3|ALA5_ARATH Putative phospholipid-transporting ATPase 5 OS=Arabidopsis thaliana GN=ALA5 PE=3 SV=1	GO:0016021(integral to membrane);GO:0005524(ATP binding);GO:0015662(ATPase activity, coupled to transmembrane movement of ions, phosphorylative mechanism);GO:0000287(magnesium ion binding);GO:0004012(phospholipid-translocating ATPase activity);GO:0006754(ATP biosynthetic process)
mes-miR156a	comp60362_c0	comp60362_c0	-
mes-miR156a	comp64759_c0	comp64759_c0	-
mes-miR156a	comp27342_c0	comp27342_c0	-
mes-miR156a	comp66091_c0	comp66091_c0	-
mes-miR156a	comp68470_c0	comp68470_c0	sp|P03708|TERL_LAMBD Large terminase protein OS=Enterobacteria phage lambda GN=A PE=3 SV=1	GO:0006323(DNA packaging)
mes-miR156a	comp286151_c0	comp286151_c0	-
mes-miR156a	comp680467_c0	comp680467_c0	-
mes-miR156a	comp66260_c0	comp66260_c0	sp|P21499|RNR_ECOLI Ribonuclease R OS=Escherichia coli (strain K12) GN=rnr PE=1 SV=2	GO:0005737(cytoplasm);GO:0008859(exoribonuclease II activity);GO:0003723(RNA binding);GO:0009405(pathogenesis);GO:0006950(response to stress);GO:0016070(RNA metabolic process)	ko00230(Purine metabolism);ko00250(Alanine,ko aspartate and glutamate metabolism)
mes-miR156a	comp410727_c0	comp410727_c0	-
mes-miR156a	comp64851_c0	comp64851_c0	-
mes-miR156a	comp8759_c0	comp8759_c0	-
mes-miR156a	comp65634_c0	comp65634_c0	sp|P18775|DMSA_ECOLI Dimethyl sulfoxide reductase DmsA OS=Escherichia coli (strain K12) GN=dmsA PE=1 SV=2	GO:0009390(dimethyl sulfoxide reductase complex);GO:0005886(plasma membrane);GO:0051539(4 iron, 4 sulfur cluster binding);GO:0009389(dimethyl sulfoxide reductase activity);GO:0009055(electron carrier activity);GO:0005506(iron ion binding);GO:0030151(molybdenum ion binding);GO:0016661(oxidoreductase activity, acting on other nitrogenous compounds as donors);GO:0009061(anaerobic respiration)
mes-miR156a	comp3530_c0	comp3530_c0	-
mes-miR156a	comp38129_c0	comp38129_c0	sp|C0LGH8|Y1634_ARATH Probable LRR receptor-like serine/threonine-protein kinase At1g63430 OS=Arabidopsis thaliana GN=At1g63430 PE=1 SV=1	GO:0016021(integral to membrane);GO:0005886(plasma membrane);GO:0005524(ATP binding);GO:0004674(protein serine/threonine kinase activity);GO:0004872(receptor activity)
mes-miR156a	comp65460_c0	comp65460_c0	sp|Q59385|COPA_ECOLI Copper-exporting P-type ATPase A OS=Escherichia coli (strain K12) GN=copA PE=1 SV=4	GO:0016021(integral to membrane);GO:0005886(plasma membrane);GO:0005524(ATP binding);GO:0004008(copper-exporting ATPase activity);GO:0004359(glutaminase activity);GO:0046872(metal ion binding);GO:0006754(ATP biosynthetic process);GO:0010447(response to acidity)
mes-miR156a	comp58915_c0	comp58915_c0	-
mes-miR156a	comp62605_c0	comp62605_c0	-
mes-miR156a	comp23573_c0	comp23573_c0	-
mes-miR156a	comp5425_c0	comp5425_c0	-
mes-miR156a	comp25220_c0	comp25220_c0	-
mes-miR156a	comp48344_c0	comp48344_c0	-
mes-miR156a	comp412882_c0	comp412882_c0	-
mes-miR156a	comp314515_c0	comp314515_c0	sp|Q657G7|CAF2P_ORYSJ CRS2-associated factor 2, chloroplastic OS=Oryza sativa subsp. japonica GN=Os01g0323300 PE=2 SV=1	GO:0009570(chloroplast stroma);GO:0030529(ribonucleoprotein complex);GO:0003723(RNA binding);GO:0006397(mRNA processing)
mes-miR156a	comp67979_c0	comp67979_c0	sp|P0AEC7|BARA_ECO57 Signal transduction histidine-protein kinase BarA OS=Escherichia coli O157:H7 GN=barA PE=3 SV=1	GO:0016021(integral to membrane);GO:0005886(plasma membrane);GO:0005524(ATP binding);GO:0000156(two-component response regulator activity);GO:0000155(two-component sensor activity);GO:0018106(peptidyl-histidine phosphorylation);GO:0006355(regulation of transcription, DNA-dependent);GO:0006351(transcription, DNA-dependent)	ko00010(Glycolysis / Gluconeogenesis);ko03018(RNA degradation)
mes-miR156a	comp52865_c0	comp52865_c0	-
mes-miR156a	comp322256_c0	comp322256_c0	sp|Q9ZUS8|MAKR3_ARATH Probable membrane-associated kinase regulator 3 OS=Arabidopsis thaliana GN=MAKR3 PE=2 SV=1	GO:0005886(plasma membrane)
mes-miR156a	comp629308_c0	comp629308_c0	-
mes-miR156a	comp9344_c0	comp9344_c0	sp|Q9S7D9|ACCR1_ARATH Serine/threonine-protein kinase-like protein CCR1 OS=Arabidopsis thaliana GN=CCR1 PE=1 SV=1	GO:0016021(integral to membrane);GO:0005524(ATP binding);GO:0042803(protein homodimerization activity);GO:0004674(protein serine/threonine kinase activity);GO:0004872(receptor activity)
mes-miR156a	comp65941_c0	comp65941_c0	sp|P00582|DPO1_ECOLI DNA polymerase I OS=Escherichia coli (strain K12) GN=polA PE=1 SV=1	GO:0005622(intracellular);GO:0008408(3'-5' exonuclease activity);GO:0008409(5'-3' exonuclease activity);GO:0003677(DNA binding);GO:0003887(DNA-directed DNA polymerase activity);GO:0006281(DNA repair);GO:0006260(DNA replication)	ko00230(Purine metabolism);ko00240(Pyrimidine metabolism);ko03030(DNA replication);ko03410(Base excision repair);ko03420(Nucleotide excision repair);ko03440(Homologous recombination)
mes-miR156a	comp35995_c0	comp35995_c0	-
mes-miR156a	comp51498_c0	comp51498_c0	sp|Q652L2|HIRA_ORYSJ Protein HIRA OS=Oryza sativa subsp. japonica GN=Os09g0567700 PE=2 SV=1	GO:0005634(nucleus);GO:0016568(chromatin modification);GO:0006355(regulation of transcription, DNA-dependent);GO:0006351(transcription, DNA-dependent)
mes-miR156a	comp597195_c0	comp597195_c0	-
mes-miR156a	comp48037_c0	comp48037_c0	-
mes-miR156a	comp31763_c0	comp31763_c0	-
mes-miR156a	comp48237_c0	comp48237_c0	-
mes-miR156a	comp43173_c0	comp43173_c0	sp|Q9LIS3|GAE6_ARATH UDP-glucuronate 4-epimerase 6 OS=Arabidopsis thaliana GN=GAE6 PE=1 SV=1	GO:0032580(Golgi cisterna membrane);GO:0016021(integral to membrane);GO:0050662(coenzyme binding);GO:0005515(protein binding);GO:0050378(UDP-glucuronate 4-epimerase activity);GO:0005975(carbohydrate metabolic process);GO:0044237(cellular metabolic process)	ko00500(Starch and sucrose metabolism);ko00520(Amino sugar and nucleotide sugar metabolism)
mes-miR156a	comp65827_c0	comp65827_c0	sp|Q9FHD7|Y5126_ARATH Probable serine/threonine-protein kinase At5g41260 OS=Arabidopsis thaliana GN=At5g41260 PE=1 SV=1	GO:0005886(plasma membrane);GO:0005524(ATP binding);GO:0004674(protein serine/threonine kinase activity)
mes-miR156a	comp31630_c0	comp31630_c0	-
mes-miR156a	comp26400_c0	comp26400_c0	-
mes-miR156a	comp58948_c0	comp58948_c0	-
mes-miR156a	comp237040_c0	comp237040_c0	sp|Q55DM1|LVSA_DICDI BEACH domain-containing protein lvsA OS=Dictyostelium discoideum GN=lvsA PE=4 SV=2	GO:0031164(contractile vacuolar membrane);GO:0005624(membrane fraction);GO:0005625(soluble fraction);GO:0005543(phospholipid binding);GO:0007155(cell adhesion);GO:0006874(cellular calcium ion homeostasis);GO:0033298(contractile vacuole organization);GO:0000915(cytokinesis, actomyosin contractile ring assembly);GO:0007032(endosome organization);GO:0007041(lysosomal transport);GO:0006909(phagocytos…
mes-miR156a	comp66081_c0	comp66081_c0	sp|Q9ESU6|BRD4_MOUSE Bromodomain-containing protein 4 OS=Mus musculus GN=Brd4 PE=1 SV=1	GO:0000794(condensed nuclear chromosome);GO:0000790(nuclear chromatin);GO:0003677(DNA binding);GO:0005515(protein binding);GO:0007059(chromosome segregation);GO:0044154(histone H3-K14 acetylation);GO:0043983(histone H4-K12 acetylation);GO:0001833(inner cell mass cell proliferation);GO:0043388(positive regulation of DNA binding);GO:0006468(protein phosphorylation)
mes-miR156a	comp62609_c0	comp62609_c0	sp|Q6NQ83|PP247_ARATH Pentatricopeptide repeat-containing protein At3g22470, mitochondrial OS=Arabidopsis thaliana GN=At3g22470 PE=2 SV=1	GO:0005739(mitochondrion);GO:0005488(binding)
mes-miR156a	comp62119_c0	comp62119_c0	sp|Q9SGY7|PEK11_ARATH Putative proline-rich receptor-like protein kinase PERK11 OS=Arabidopsis thaliana GN=PERK11 PE=2 SV=2	GO:0016021(integral to membrane);GO:0005886(plasma membrane);GO:0005524(ATP binding);GO:0004674(protein serine/threonine kinase activity)	ko00270(Cysteine and methionine metabolism)
mes-miR156a	comp68027_c0	comp68027_c0	sp|Q8GX77|FB316_ARATH F-box protein At1g61340 OS=Arabidopsis thaliana GN=At1g61340 PE=2 SV=1
mes-miR156a	comp56484_c0	comp56484_c0	sp|P76551|EUTA_ECOLI Ethanolamine utilization protein EutA OS=Escherichia coli (strain K12) GN=eutA PE=3 SV=1	GO:0051349(positive regulation of lyase activity);GO:0030091(protein repair)	ko00860(Porphyrin and chlorophyll metabolism)
mes-miR156a	comp64025_c0	comp64025_c0	sp|Q9FKJ0|FK132_ARATH F-box/kelch-repeat protein At5g60570 OS=Arabidopsis thaliana GN=At5g60570 PE=2 SV=1	GO:0005634(nucleus)
mes-miR156a	comp288809_c0	comp288809_c0	sp|O04084|SCP31_ARATH Serine carboxypeptidase-like 31 OS=Arabidopsis thaliana GN=SCPL31 PE=2 SV=2	GO:0005576(extracellular region);GO:0004185(serine-type carboxypeptidase activity);GO:0006508(proteolysis)
mes-miR156a	comp702983_c0	comp702983_c0	-
mes-miR156a	comp53886_c0	comp53886_c0	-
mes-miR156a	comp50018_c0	comp50018_c0	sp|Q8VYY5|NCRK_ARATH Receptor-like serine/threonine-protein kinase NCRK OS=Arabidopsis thaliana GN=NCRK PE=1 SV=1	GO:0012505(endomembrane system);GO:0016021(integral to membrane);GO:0031902(late endosome membrane);GO:0005886(plasma membrane);GO:0005524(ATP binding);GO:0051020(GTPase binding);GO:0004674(protein serine/threonine kinase activity);GO:0004872(receptor activity);GO:0010089(xylem development)
mes-miR156a	comp67254_c0	comp67254_c0	sp|P30130|FIMD_ECOLI Outer membrane usher protein FimD OS=Escherichia coli (strain K12) GN=fimD PE=1 SV=2	GO:0009279(cell outer membrane);GO:0016021(integral to membrane);GO:0005886(plasma membrane);GO:0005215(transporter activity)
mes-miR156a	comp66362_c0	comp66362_c0	sp|Q9M8R4|DJ1D_ARATH Protein DJ-1 homolog D OS=Arabidopsis thaliana GN=DJ1D PE=1 SV=1
mes-miR156a	comp56434_c0	comp56434_c0	sp|O48670|RER1A_ARATH Protein RER1A OS=Arabidopsis thaliana GN=RER1A PE=2 SV=1	GO:0005794(Golgi apparatus);GO:0016021(integral to membrane);GO:0006890(retrograde vesicle-mediated transport, Golgi to ER)
mes-miR156a	comp42961_c0	comp42961_c0	-
mes-miR156a	comp50683_c0	comp50683_c0	-
mes-miR156a	comp59939_c1	comp59939_c1	sp|Q38970|ACC1_ARATH Acetyl-CoA carboxylase 1 OS=Arabidopsis thaliana GN=ACC1 PE=1 SV=1	GO:0005829(cytosol);GO:0005886(plasma membrane);GO:0003989(acetyl-CoA carboxylase activity);GO:0005524(ATP binding);GO:0004075(biotin carboxylase activity);GO:0046872(metal ion binding);GO:0030497(fatty acid elongation);GO:0010072(primary shoot apical meristem specification);GO:0009735(response to cytokinin stimulus);GO:0048364(root development)	ko00061(Fatty acid biosynthesis);ko00620(Pyruvate metabolism);ko00640(Propanoate metabolism);ko04910(Insulin signaling pathway)
mes-miR156a	comp31850_c0	comp31850_c0	sp|Q9LY77|ACA12_ARATH Calcium-transporting ATPase 12, plasma membrane-type OS=Arabidopsis thaliana GN=ACA12 PE=2 SV=1	GO:0016021(integral to membrane);GO:0005524(ATP binding);GO:0005388(calcium-transporting ATPase activity);GO:0005516(calmodulin binding);GO:0046872(metal ion binding);GO:0006754(ATP biosynthetic process)
mes-miR156a	comp47977_c0	comp47977_c0	-
mes-miR156a	comp43339_c0	comp43339_c0	-
mes-miR156a	comp39933_c0	comp39933_c0	-
mes-miR156a	comp50588_c0	comp50588_c0	sp|Q9ZT50|RHA2A_ARATH E3 ubiquitin-protein ligase RHA2A OS=Arabidopsis thaliana GN=RHA2A PE=1 SV=1	GO:0005737(cytoplasm);GO:0005634(nucleus);GO:0005515(protein binding);GO:0004842(ubiquitin-protein ligase activity);GO:0008270(zinc ion binding);GO:0009738(abscisic acid mediated signaling pathway);GO:0009789(positive regulation of abscisic acid mediated signaling pathway);GO:0047484(regulation of response to osmotic stress);GO:0009651(response to salt stress)
mes-miR156a	comp67072_c0	comp67072_c0	-
mes-miR156a	comp62363_c0	comp62363_c0	sp|Q9LFT9|RAH1E_ARATH Ras-related protein RABH1e OS=Arabidopsis thaliana GN=RABH1E PE=2 SV=1	GO:0000139(Golgi membrane);GO:0005525(GTP binding);GO:0015031(protein transport);GO:0007264(small GTPase mediated signal transduction);GO:0016192(vesicle-mediated transport)
mes-miR156a	comp63751_c0	comp63751_c0	-
mes-miR156a	comp56090_c0	comp56090_c0	-
mes-miR156a	comp24263_c0	comp24263_c0	-
mes-miR156a	comp50734_c0	comp50734_c0	sp|Q9LIK7|ACA13_ARATH Putative calcium-transporting ATPase 13, plasma membrane-type OS=Arabidopsis thaliana GN=ACA13 PE=3 SV=1	GO:0016021(integral to membrane);GO:0005524(ATP binding);GO:0005388(calcium-transporting ATPase activity);GO:0005516(calmodulin binding);GO:0046872(metal ion binding);GO:0006754(ATP biosynthetic process)
mes-miR156a	comp52510_c0	comp52510_c0	-
mes-miR156a	comp558223_c0	comp558223_c0	-
mes-miR156a	comp788663_c0	comp788663_c0	-
mes-miR156a	comp62476_c0	comp62476_c0	-
mes-miR156a	comp66379_c0	comp66379_c0	-
mes-miR156a	comp65408_c1	comp65408_c1	-
mes-miR156a	comp182330_c0	comp182330_c0	-
mes-miR156a	comp529340_c0	comp529340_c0	-
mes-miR156a	comp612251_c0	comp612251_c0	sp|Q9FT69|RQSIM_ARATH ATP-dependent DNA helicase Q-like SIM OS=Arabidopsis thaliana GN=RECQSIM PE=2 SV=1	GO:0005634(nucleus);GO:0043138(3'-5' DNA helicase activity);GO:0005524(ATP binding);GO:0008026(ATP-dependent helicase activity);GO:0046872(metal ion binding);GO:0003676(nucleic acid binding);GO:0006310(DNA recombination);GO:0006281(DNA repair)
mes-miR156a	comp60845_c0	comp60845_c0	sp|Q9S834|CLPP5_ARATH ATP-dependent Clp protease proteolytic subunit 5, chloroplastic OS=Arabidopsis thaliana GN=CLPP5 PE=1 SV=1	GO:0009941(chloroplast envelope);GO:0009534(chloroplast thylakoid);GO:0009840(chloroplastic endopeptidase Clp complex);GO:0005524(ATP binding);GO:0004252(serine-type endopeptidase activity);GO:0006508(proteolysis)	ko04112(Cell cycle - Caulobacter)
mes-miR156a	comp444218_c0	comp444218_c0	-
mes-miR156a	comp39670_c0	comp39670_c0	sp|Q9LK03|PERK2_ARATH Proline-rich receptor-like protein kinase PERK2 OS=Arabidopsis thaliana GN=PERK2 PE=2 SV=3	GO:0016021(integral to membrane);GO:0005886(plasma membrane);GO:0005524(ATP binding);GO:0004674(protein serine/threonine kinase activity);GO:0004872(receptor activity)
mes-miR156a	comp43929_c0	comp43929_c0	sp|Q84K47|AB2A_ARATH ABC transporter A family member 2 OS=Arabidopsis thaliana GN=ABCA2 PE=2 SV=1	GO:0016021(integral to membrane);GO:0005524(ATP binding);GO:0016887(ATPase activity);GO:0006810(transport)	ko02010(ABC transporters)
mes-miR156a	comp54380_c0	comp54380_c0	-
mes-miR156a	comp1161377_c0	comp1161377_c0	-
mes-miR156a	comp755445_c0	comp755445_c0	sp|Q9LRZ3|PUM24_ARATH Pumilio homolog 24 OS=Arabidopsis thaliana GN=APUM24 PE=2 SV=1	GO:0005730(nucleolus);GO:0003723(RNA binding);GO:0006417(regulation of translation)
mes-miR156a	comp49064_c0	comp49064_c0	-
mes-miR156a	comp42995_c0	comp42995_c0	-
mes-miR156a	comp59272_c0	comp59272_c0	sp|F4HTM3|GCS1_ARATH Mannosyl-oligosaccharide glucosidase GCS1 OS=Arabidopsis thaliana GN=GCS1 PE=1 SV=1		ko00510(N-Glycan biosynthesis)
mes-miR156a	comp44966_c0	comp44966_c0	-
mes-miR156a	comp51765_c0	comp51765_c0	sp|Q9S836|LAX2_ARATH Auxin transporter-like protein 2 OS=Arabidopsis thaliana GN=LAX2 PE=2 SV=1	GO:0016021(integral to membrane);GO:0005886(plasma membrane);GO:0015293(symporter activity);GO:0006865(amino acid transport);GO:0009734(auxin mediated signaling pathway);GO:0009624(response to nematode)
mes-miR156a	comp61663_c0	comp61663_c0	-
mes-miR156a	comp39879_c0	comp39879_c0	-
mes-miR156a	comp28256_c0	comp28256_c0	-
mes-miR156a	comp44987_c0	comp44987_c0	sp|Q9M2V7|AB16G_ARATH ABC transporter G family member 16 OS=Arabidopsis thaliana GN=ABCG16 PE=2 SV=2	GO:0016021(integral to membrane);GO:0005524(ATP binding);GO:0016887(ATPase activity);GO:0006810(transport)
mes-miR156a	comp30829_c0	comp30829_c0	sp|Q8VZG8|Y4885_ARATH Probable LRR receptor-like serine/threonine-protein kinase At4g08850 OS=Arabidopsis thaliana GN=At4g08850 PE=1 SV=3	GO:0016021(integral to membrane);GO:0005886(plasma membrane);GO:0009506(plasmodesma);GO:0005524(ATP binding);GO:0004674(protein serine/threonine kinase activity);GO:0004713(protein tyrosine kinase activity);GO:0004872(receptor activity)
mes-miR156a	comp37200_c0	comp37200_c0	-
mes-miR156a	comp41708_c0	comp41708_c0	-
mes-miR156a	comp67413_c1	comp67413_c1	sp|P93508|CALR_RICCO Calreticulin OS=Ricinus communis PE=2 SV=1	GO:0005788(endoplasmic reticulum lumen);GO:0005509(calcium ion binding);GO:0005529(sugar binding);GO:0051082(unfolded protein binding);GO:0006457(protein folding)	ko04145(Phagosome);ko04612(Antigen processing and presentation)
mes-miR156a	comp48575_c0	comp48575_c0	-
mes-miR156a	comp66547_c0	comp66547_c0	-		ko00230(Purine metabolism);ko00240(Pyrimidine metabolism);ko03020(RNA polymerase)
mes-miR156a	comp63392_c0	comp63392_c0	-
mes-miR156a	comp40828_c0	comp40828_c0	sp|Q9SYJ2|GPAT3_ARATH Probable glycerol-3-phosphate acyltransferase 3 OS=Arabidopsis thaliana GN=GPAT3 PE=2 SV=1	GO:0016021(integral to membrane);GO:0004366(glycerol-3-phosphate O-acyltransferase activity);GO:0008654(phospholipid biosynthetic process)
mes-miR156a	comp64161_c0	comp64161_c0	sp|Q9M060|IF62_ARATH Eukaryotic translation initiation factor 6-2 OS=Arabidopsis thaliana GN=EIF6-2 PE=2 SV=1	GO:0005829(cytosol);GO:0005730(nucleolus);GO:0043022(ribosome binding);GO:0003743(translation initiation factor activity);GO:0071215(cellular response to abscisic acid stimulus);GO:0009793(embryo development ending in seed dormancy);GO:0042256(mature ribosome assembly)
mes-miR156a	comp64858_c0	comp64858_c0	sp|Q9FHQ3|HS157_ARATH 15.7 kDa heat shock protein, peroxisomal OS=Arabidopsis thaliana GN=HSP15.7 PE=2 SV=1	GO:0005782(peroxisomal matrix);GO:0006457(protein folding);GO:0009408(response to heat);GO:0000302(response to reactive oxygen species)
mes-miR156a	comp67608_c0	comp67608_c0	sp|P41382|IF410_TOBAC Eukaryotic initiation factor 4A-10 OS=Nicotiana tabacum PE=1 SV=1	GO:0005524(ATP binding);GO:0008026(ATP-dependent helicase activity);GO:0003743(translation initiation factor activity)
mes-miR156a	comp38512_c0	comp38512_c0	-
mes-miR156a	comp4466_c0	comp4466_c0	-
mes-miR156a	comp44408_c0	comp44408_c0	sp|Q9LVM0|Y5830_ARATH Probable inactive receptor kinase At5g58300 OS=Arabidopsis thaliana GN=At5g58300 PE=1 SV=1	GO:0016021(integral to membrane);GO:0005886(plasma membrane);GO:0005524(ATP binding);GO:0004672(protein kinase activity);GO:0004872(receptor activity)
mes-miR156a	comp51805_c0	comp51805_c0	-
mes-miR156a	comp57359_c0	comp57359_c0	sp|Q38813|DNAJ1_ARATH Chaperone protein dnaJ 1, mitochondrial OS=Arabidopsis thaliana GN=ATJ1 PE=2 SV=2	GO:0005739(mitochondrion);GO:0005524(ATP binding);GO:0031072(heat shock protein binding);GO:0003676(nucleic acid binding);GO:0051082(unfolded protein binding);GO:0008270(zinc ion binding);GO:0006457(protein folding);GO:0009408(response to heat)
mes-miR156a	comp355887_c0	comp355887_c0	-
mes-miR156a	comp24955_c0	comp24955_c0	sp|Q9LZ20|CAAT6_ARATH Cationic amino acid transporter 6, chloroplastic OS=Arabidopsis thaliana GN=CAT6 PE=2 SV=1
mes-miR156a	comp60700_c0	comp60700_c0	-
mes-miR156a	comp41711_c0	comp41711_c0	-
mes-miR156a	comp68293_c0	comp68293_c0	sp|Q8S0F0|FH1_ORYSJ Formin-like protein 1 OS=Oryza sativa subsp. japonica GN=FH1 PE=2 SV=1	GO:0016021(integral to membrane);GO:0003779(actin binding);GO:0030036(actin cytoskeleton organization)
mes-miR156a	comp62835_c0	comp62835_c0	sp|O23547|EXLB1_ARATH Expansin-like B1 OS=Arabidopsis thaliana GN=EXLB1 PE=2 SV=2	GO:0005576(extracellular region);GO:0019953(sexual reproduction)
mes-miR156a	comp65006_c0	comp65006_c0	sp|Q8L7U5|BSL1_ARATH Serine/threonine-protein phosphatase BSL1 OS=Arabidopsis thaliana GN=BSL1 PE=1 SV=2	GO:0005634(nucleus);GO:0005886(plasma membrane);GO:0005506(iron ion binding);GO:0030145(manganese ion binding);GO:0004721(phosphoprotein phosphatase activity);GO:0005515(protein binding)
mes-miR156a	comp55119_c0	comp55119_c0	-
mes-miR156a	comp57215_c0	comp57215_c0	sp|Q9SB61|Y4466_ARATH ZF-HD homeobox protein At4g24660 OS=Arabidopsis thaliana GN=At4g24660 PE=1 SV=1	GO:0005634(nucleus);GO:0003677(DNA binding);GO:0046872(metal ion binding);GO:0005515(protein binding);GO:0009793(embryo development ending in seed dormancy);GO:0006355(regulation of transcription, DNA-dependent);GO:0006351(transcription, DNA-dependent)
mes-miR156a	comp306810_c0	comp306810_c0	-
mes-miR156a	comp421839_c0	comp421839_c0	sp|Q9LDN0|KN12A_ARATH Kinesin-like protein KIN12A OS=Arabidopsis thaliana GN=KIN12A PE=1 SV=1
mes-miR156a	comp60671_c0	comp60671_c0	sp|Q8VYL3|APA2_ARATH Aspartic proteinase A2 OS=Arabidopsis thaliana GN=APA2 PE=2 SV=1
mes-miR156a	comp59086_c0	comp59086_c0	-
mes-miR156a	comp60271_c0	comp60271_c0	-
mes-miR156a	comp60116_c0	comp60116_c0	sp|Q9LIH7|ZDHC7_ARATH Probable S-acyltransferase At3g18620 OS=Arabidopsis thaliana GN=At3g18620 PE=2 SV=1	GO:0016021(integral to membrane);GO:0016746(transferase activity, transferring acyl groups);GO:0008270(zinc ion binding)
mes-miR156a	comp49243_c0	comp49243_c0	-
mes-miR156a	comp65836_c0	comp65836_c0	-
mes-miR156a	comp48675_c0	comp48675_c0	-
mes-miR156a	comp66651_c0	comp66651_c0	-
mes-miR156a	comp51272_c0	comp51272_c0	sp|Q9LJ64|PLRX1_ARATH Pollen-specific leucine-rich repeat extensin-like protein 1 OS=Arabidopsis thaliana GN=PEX1 PE=2 SV=1	GO:0005618(cell wall);GO:0005576(extracellular region);GO:0007047(cellular cell wall organization)
mes-miR156a	comp40301_c0	comp40301_c0	-
mes-miR156a	comp65882_c0	comp65882_c0	-
mes-miR156a	comp40547_c0	comp40547_c0	sp|Q9T6H8|CCF1_ARATH Putative cytochrome c biogenesis ccmF N-terminal-like mitochondrial protein OS=Arabidopsis thaliana GN=CCMFN1 PE=1 SV=3	GO:0016021(integral to membrane);GO:0031966(mitochondrial membrane);GO:0015232(heme transporter activity);GO:0005515(protein binding);GO:0017004(cytochrome complex assembly);GO:0008535(respiratory chain complex IV assembly)
mes-miR156a	comp67576_c0	comp67576_c0	sp|P94111|STS1_ARATH Strictosidine synthase 1 OS=Arabidopsis thaliana GN=SS1 PE=2 SV=2	GO:0005886(plasma membrane);GO:0009506(plasmodesma);GO:0005774(vacuolar membrane);GO:0016844(strictosidine synthase activity);GO:0009820(alkaloid metabolic process);GO:0009058(biosynthetic process);GO:0009753(response to jasmonic acid stimulus);GO:0009611(response to wounding)	ko00901(Indole alkaloid biosynthesis)
mes-miR156a	comp51591_c0	comp51591_c0	-
mes-miR156a	comp66318_c0	comp66318_c0	sp|B1X8Q2|RLMKL_ECODH Ribosomal RNA large subunit methyltransferase K/L OS=Escherichia coli (strain K12 / DH10B) GN=rlmL PE=3 SV=1	GO:0005737(cytoplasm);GO:0003723(RNA binding);GO:0008990(rRNA )
mes-miR156a	comp50197_c0	comp50197_c0	-
mes-miR156a	comp56020_c0	comp56020_c0	sp|P17411|CHBF_ECOLI 6-phospho-beta-glucosidase OS=Escherichia coli (strain K12) GN=chbF PE=1 SV=4	GO:0008706(6-phospho-beta-glucosidase activity);GO:0046872(metal ion binding);GO:0016616(oxidoreductase activity, acting on the CH-OH group of donors, NAD or NADP as acceptor);GO:0016052(carbohydrate catabolic process)
mes-miR156a	comp40547_c0	comp40547_c0	sp|Q9T6H8|CCF1_ARATH Putative cytochrome c biogenesis ccmF N-terminal-like mitochondrial protein OS=Arabidopsis thaliana GN=CCMFN1 PE=1 SV=3	GO:0016021(integral to membrane);GO:0031966(mitochondrial membrane);GO:0015232(heme transporter activity);GO:0005515(protein binding);GO:0017004(cytochrome complex assembly);GO:0008535(respiratory chain complex IV assembly)
mtr-miR156h-3p_1ss8AC	comp50934_c0	comp50934_c0	sp|Q7QBW0|SPAST_ANOGA Spastin OS=Anopheles gambiae GN=spas PE=3 SV=6	GO:0016021(integral to membrane);GO:0005874(microtubule);GO:0005815(microtubule organizing center);GO:0005524(ATP binding);GO:0008017(microtubule binding);GO:0008568(microtubule-severing ATPase activity);GO:0007049(cell cycle);GO:0051301(cell division);GO:0051013(microtubule severing)
mtr-miR156h-3p_1ss8AC	comp31152_c0	comp31152_c0	sp|O65351|SUBL_ARATH Subtilisin-like protease OS=Arabidopsis thaliana GN=ARA12 PE=1 SV=1	GO:0048046(apoplast);GO:0009505(plant-type cell wall);GO:0042802(identical protein binding);GO:0004252(serine-type endopeptidase activity);GO:0080001(mucilage extrusion from seed coat);GO:0048359(mucilage metabolic process involved seed coat development);GO:0043086(negative regulation of catalytic activity);GO:0006508(proteolysis)
mtr-miR156h-3p_1ss8AC	comp66713_c0	comp66713_c0	sp|Q8RX77|PTR21_ARATH Nitrate transporter 1.7 OS=Arabidopsis thaliana GN=NRT1.7 PE=1 SV=1	GO:0016021(integral to membrane);GO:0005886(plasma membrane);GO:0080054(low affinity nitrate transmembrane transporter activity);GO:0015293(symporter activity);GO:0080055(low affinity nitrate transport);GO:0042128(nitrate assimilation);GO:0006857(oligopeptide transport)
mtr-miR156h-3p_1ss8AC	comp508865_c0	comp508865_c0	-
mtr-miR156h-3p_1ss8AC	comp27812_c0	comp27812_c0	-
mtr-miR156h-3p_1ss8AC	comp339132_c0	comp339132_c0	-
mtr-miR156h-3p_1ss8AC	comp54284_c0	comp54284_c0	-
mtr-miR156h-3p_1ss8AC	comp40235_c0	comp40235_c0	-
mtr-miR156h-3p_1ss8AC	comp66812_c0	comp66812_c0	sp|Q42942|UMPS_TOBAC Uridine 5'-monophosphate synthase (Fragment) OS=Nicotiana tabacum GN=PYR5-6 PE=2 SV=1	GO:0004588(orotate phosphoribosyltransferase activity);GO:0004590(orotidine-5'-phosphate decarboxylase activity);GO:0006207('de novo' pyrimidine base biosynthetic process);GO:0044205('de novo' UMP biosynthetic process)	ko00240(Pyrimidine metabolism)
mtr-miR156h-3p_1ss8AC	comp44036_c0	comp44036_c0	-
mtr-miR156h-3p_1ss8AC	comp61101_c0	comp61101_c0	sp|Q54DY9|BCS1B_DICDI Probable mitochondrial chaperone BCS1-B OS=Dictyostelium discoideum GN=bcsl1b PE=3 SV=1	GO:0016021(integral to membrane);GO:0005743(mitochondrial inner membrane);GO:0005524(ATP binding);GO:0016887(ATPase activity);GO:0051131(chaperone-mediated protein complex assembly)
mtr-miR156h-3p_1ss8AC	comp55218_c0	comp55218_c0	-
mtr-miR156h-3p_1ss8AC	comp51384_c0	comp51384_c0	-
mtr-miR156h-3p_1ss8AC	comp53925_c0	comp53925_c0	-
mtr-miR156h-3p_1ss8AC	comp61992_c0	comp61992_c0	sp|Q9FKS8|LHT1_ARATH Lysine histidine transporter 1 OS=Arabidopsis thaliana GN=LHT1 PE=1 SV=1	GO:0016021(integral to membrane);GO:0005886(plasma membrane);GO:0015171(amino acid transmembrane transporter activity);GO:0015293(symporter activity);GO:0043090(amino acid import);GO:0080167(response to karrikin)
mtr-miR156h-3p_1ss8AC	comp61328_c0	comp61328_c0	-
mtr-miR156h-3p_1ss8AC	comp44575_c0	comp44575_c0	-
mtr-miR156h-3p_1ss8AC	comp33621_c0	comp33621_c0	sp|Q9FJ10|GAT16_ARATH GATA transcription factor 16 OS=Arabidopsis thaliana GN=GATA16 PE=2 SV=1	GO:0005634(nucleus);GO:0043565(sequence-specific DNA binding);GO:0003700(sequence-specific DNA binding transcription factor activity);GO:0008270(zinc ion binding)
mtr-miR156h-3p_1ss8AC	comp645349_c0	comp645349_c0	-
mtr-miR156h-3p_1ss8AC	comp62918_c0	comp62918_c0	-
mtr-miR156h-3p_1ss8AC	comp56427_c0	comp56427_c0	-
mtr-miR156h-3p_1ss8AC	comp29194_c0	comp29194_c0	-
mtr-miR156h-3p_1ss8AC	comp56469_c0	comp56469_c0	-
mtr-miR156h-3p_1ss8AC	comp498676_c0	comp498676_c0	-
mtr-miR156h-3p_1ss8AC	comp42361_c0	comp42361_c0	-
mtr-miR156h-3p_1ss8AC	comp57349_c0	comp57349_c0	-		ko03410(Base excision repair)
mtr-miR156h-3p_1ss8AC	comp57636_c0	comp57636_c0	-
mtr-miR156h-3p_1ss8AC	comp18866_c0	comp18866_c0	-
mtr-miR156h-3p_1ss8AC	comp311611_c0	comp311611_c0	-
mtr-miR156h-3p_1ss8AC	comp49234_c0	comp49234_c0	-
mtr-miR156h-3p_1ss8AC	comp168124_c0	comp168124_c0	-
mtr-miR156h-3p_1ss8AC	comp50649_c0	comp50649_c0	-
mtr-miR156h-3p_1ss8AC	comp59050_c0	comp59050_c0	-
mtr-miR156h-3p_1ss8AC	comp34060_c0	comp34060_c0	-		ko04112(Cell cycle - Caulobacter)
mtr-miR156h-3p_1ss8AC	comp52667_c0	comp52667_c0	sp|Q9AWA5|GWD1_SOLTU Alpha-glucan water dikinase, chloroplastic OS=Solanum tuberosum GN=R1 PE=1 SV=2	GO:0009507(chloroplast);GO:0050521(alpha-glucan, water dikinase activity);GO:0005524(ATP binding);GO:0016874(ligase activity);GO:0046872(metal ion binding);GO:0004673(protein histidine kinase activity);GO:0005975(carbohydrate metabolic process)
mtr-miR156h-3p_1ss8AC	comp15002_c0	comp15002_c0	-
mtr-miR156h-3p_1ss8AC	comp496047_c0	comp496047_c0	-
mtr-miR156h-3p_1ss8AC	comp12035_c0	comp12035_c0	-
mtr-miR156h-3p_1ss8AC	comp49252_c0	comp49252_c0	-
mtr-miR156h-3p_1ss8AC	comp25960_c0	comp25960_c0	sp|Q9ZU11|ATB15_ARATH Homeobox-leucine zipper protein ATHB-15 OS=Arabidopsis thaliana GN=ATHB-15 PE=1 SV=1	GO:0005634(nucleus);GO:0043565(sequence-specific DNA binding);GO:0003700(sequence-specific DNA binding transcription factor activity);GO:0030154(cell differentiation);GO:0048263(determination of dorsal identity);GO:0009965(leaf morphogenesis);GO:0010014(meristem initiation);GO:0010087(phloem or xylem histogenesis);GO:0010075(regulation of meristem growth)
mtr-miR156h-3p_1ss8AC	comp52745_c0	comp52745_c0	sp|Q9M891|PP208_ARATH Pentatricopeptide repeat-containing protein At3g02490, mitochondrial OS=Arabidopsis thaliana GN=At3g02490 PE=2 SV=1	GO:0005739(mitochondrion)
mtr-miR156h-3p_1ss8AC	comp65543_c0	comp65543_c0	-
mtr-miR156h-3p_1ss8AC	comp51443_c0	comp51443_c0	-
mtr-miR156h-3p_1ss8AC	comp31760_c0	comp31760_c0	sp|Q9S7C9|ESCA_ARATH Putative DNA-binding protein ESCAROLA OS=Arabidopsis thaliana GN=ESC PE=2 SV=1	GO:0005634(nucleus);GO:0003680(AT DNA binding);GO:0003690(double-stranded DNA binding);GO:0006325(chromatin organization);GO:0010150(leaf senescence);GO:0009640(photomorphogenesis)
mtr-miR156h-3p_1ss8AC	comp903_c0	comp903_c0	-
mtr-miR156h-3p_1ss8AC	comp13857_c0	comp13857_c0	-
mtr-miR156h-3p_1ss8AC	comp46073_c0	comp46073_c0	-
mtr-miR156h-3p_1ss8AC	comp65957_c0	comp65957_c0	sp|Q9C758|TCP24_ARATH Transcription factor TCP24 OS=Arabidopsis thaliana GN=TCP24 PE=1 SV=1	GO:0005634(nucleus);GO:0003677(DNA binding);GO:0005515(protein binding);GO:0048366(leaf development);GO:0008285(negative regulation of cell proliferation);GO:0006355(regulation of transcription, DNA-dependent);GO:0006351(transcription, DNA-dependent)
mtr-miR156h-3p_1ss8AC	comp35653_c0	comp35653_c0	sp|O23066|C86A2_ARATH Cytochrome P450 86A2 OS=Arabidopsis thaliana GN=CYP86A2 PE=2 SV=1	GO:0016021(integral to membrane);GO:0018685(alkane 1-monooxygenase activity);GO:0009055(electron carrier activity);GO:0020037(heme binding);GO:0005515(protein binding);GO:0006631(fatty acid metabolic process)	ko00361(gamma-Hexachlorocyclohexane degradation);ko00626(Naphthalene and anthracene degradation);ko00903(Limonene and pinene degradation);ko00945(Stilbenoid,ko diarylheptanoid and gingerol biosynthesis)
mtr-miR156h-3p_1ss8AC	comp68532_c0	comp68532_c0	sp|Q03460|GLSN_MEDSA Glutamate synthase [NADH], amyloplastic OS=Medicago sativa PE=1 SV=1	GO:0009501(amyloplast);GO:0051538(3 iron, 4 sulfur cluster binding);GO:0050660(flavin adenine dinucleotide binding);GO:0010181(FMN binding);GO:0016040(glutamate synthase );GO:0005506(iron ion binding);GO:0006537(glutamate biosynthetic process);GO:0006541(glutamine metabolic process)	ko00250(Alanine,ko aspartate and glutamate metabolism);ko00910(Nitrogen metabolism)
mtr-miR156h-3p_1ss8AC	comp67954_c0	comp67954_c0	sp|Q8LPG9|IQD14_ARATH Protein IQ-DOMAIN 14 OS=Arabidopsis thaliana GN=IQD14 PE=1 SV=1	GO:0005886(plasma membrane)
mtr-miR156h-3p_1ss8AC	comp61231_c0	comp61231_c0	sp|P46269|QCR8_SOLTU Cytochrome b-c1 complex subunit 8 OS=Solanum tuberosum PE=1 SV=2	GO:0005743(mitochondrial inner membrane);GO:0070469(respiratory chain);GO:0008121(ubiquinol-cytochrome-c reductase activity);GO:0022900(electron transport chain)
mtr-miR156h-3p_1ss8AC	comp63682_c0	comp63682_c0	sp|Q9LVA0|BAG7_ARATH BAG family molecular chaperone regulator 7 OS=Arabidopsis thaliana GN=BAG7 PE=1 SV=1
mtr-miR156h-3p_1ss8AC	comp68545_c0	comp68545_c0	sp|Q9ZWA1|C3H2_ARATH Zinc finger CCCH domain-containing protein 2 OS=Arabidopsis thaliana GN=At1g03790 PE=2 SV=1	GO:0005634(nucleus);GO:0003677(DNA binding);GO:0008270(zinc ion binding);GO:0010187(negative regulation of seed germination);GO:0006355(regulation of transcription, DNA-dependent);GO:0006351(transcription, DNA-dependent)
mtr-miR156h-3p_1ss8AC	comp241942_c0	comp241942_c0	-
mtr-miR156h-3p_1ss8AC	comp801495_c0	comp801495_c0	-
mtr-miR156h-3p_1ss8AC	comp628393_c0	comp628393_c0	-
mtr-miR156h-3p_1ss8AC	comp54103_c0	comp54103_c0	-
mtr-miR156h-3p_1ss8AC	comp63701_c0	comp63701_c0	sp|Q8VZ37|AP3S_ARATH AP-3 complex subunit sigma OS=Arabidopsis thaliana GN=At3g50860 PE=2 SV=1	GO:0010008(endosome membrane);GO:0030117(membrane coat);GO:0008565(protein transporter activity);GO:0006897(endocytosis);GO:0006886(intracellular protein transport)	ko04142(Lysosome)
mtr-miR156h-3p_1ss8AC	comp26624_c0	comp26624_c0	-
mtr-miR156h-3p_1ss8AC	comp506171_c0	comp506171_c0	-
mtr-miR156h-3p_1ss8AC	comp41783_c0	comp41783_c0	-
mtr-miR156h-3p_1ss8AC	comp47853_c0	comp47853_c0	sp|Q68CM3|TCS2_CAMSI Probable caffeine synthase 2 OS=Camellia sinensis GN=TCS2 PE=2 SV=1	GO:0008168(methyltransferase activity);GO:0009820(alkaloid metabolic process)
mtr-miR156h-3p_1ss8AC	comp45096_c1	comp45096_c1	-
mtr-miR156h-3p_1ss8AC	comp26389_c0	comp26389_c0	-
mtr-miR156h-3p_1ss8AC	comp61002_c0	comp61002_c0	-
mtr-miR156h-3p_1ss8AC	comp62910_c0	comp62910_c0	sp|Q39079|DNJ13_ARATH Chaperone protein dnaJ 13 OS=Arabidopsis thaliana GN=ATJ13 PE=1 SV=2	GO:0016021(integral to membrane);GO:0031072(heat shock protein binding);GO:0051082(unfolded protein binding);GO:0006457(protein folding);GO:0055122(response to very low light intensity stimulus);GO:0010228(vegetative to reproductive phase transition of meristem)
mtr-miR156h-3p_1ss8AC	comp54667_c0	comp54667_c0	-
mtr-miR156h-3p_1ss8AC	comp39542_c0	comp39542_c0	-
mtr-miR156h-3p_1ss8AC	comp55194_c0	comp55194_c0	sp|P30185|DHR18_ARATH Dehydrin Rab18 OS=Arabidopsis thaliana GN=RAB18 PE=2 SV=1	GO:0009631(cold acclimation);GO:0009961(response to 1-aminocyclopropane-1-carboxylic acid);GO:0009737(response to abscisic acid stimulus);GO:0009414(response to water deprivation)
mtr-miR156h-3p_1ss8AC	comp43589_c0	comp43589_c0	-
mtr-miR156h-3p_1ss8AC	comp566353_c0	comp566353_c0	sp|Q9C5U1|AHK3_ARATH Histidine kinase 3 OS=Arabidopsis thaliana GN=AHK3 PE=1 SV=1	GO:0016021(integral to membrane);GO:0005886(plasma membrane);GO:0005524(ATP binding);GO:0009884(cytokinin receptor activity);GO:0005034(osmosensor activity);GO:0043424(protein histidine kinase binding);GO:0000156(two-component response regulator activity);GO:0000155(two-component sensor activity);GO:0071215(cellular response to abscisic acid stimulus);GO:0070417(cellular response to cold);GO:0016…
mtr-miR156h-3p_1ss8AC	comp10991_c0	comp10991_c0	-
mtr-miR156h-3p_1ss8AC	comp50372_c0	comp50372_c0	sp|Q8L785|SYGM2_ARATH Glycine--tRNA ligase 2, chloroplastic/mitochondrial OS=Arabidopsis thaliana GN=GLYRS-2 PE=2 SV=1	GO:0009570(chloroplast stroma);GO:0005739(mitochondrion);GO:0005524(ATP binding);GO:0004820(glycine-tRNA ligase activity);GO:0046983(protein dimerization activity);GO:0009793(embryo development ending in seed dormancy);GO:0006426(glycyl-tRNA aminoacylation);GO:0045995(regulation of embryonic development)	ko00970(Aminoacyl-tRNA biosynthesis)
mtr-miR156h-3p_1ss8AC	comp56407_c0	comp56407_c0	sp|Q38834|R13L4_ARATH Disease resistance RPP13-like protein 4 OS=Arabidopsis thaliana GN=RPP13L4 PE=2 SV=2	GO:0005524(ATP binding);GO:0006915(apoptosis);GO:0006952(defense response)
mtr-miR156h-3p_1ss8AC	comp52995_c0	comp52995_c0	-
mtr-miR156h-3p_1ss8AC	comp54361_c0	comp54361_c0	sp|Q93VK5|LUT5_ARATH Protein LUTEIN DEFICIENT 5, chloroplastic OS=Arabidopsis thaliana GN=CYP97A3 PE=1 SV=1	GO:0031969(chloroplast membrane);GO:0010291(carotene beta-ring hydroxylase activity);GO:0009055(electron carrier activity);GO:0020037(heme binding);GO:0016705(oxidoreductase activity, acting on paired donors, with incorporation or reduction of molecular oxygen);GO:0016117(carotenoid biosynthetic process)	ko00906(Carotenoid biosynthesis)
mtr-miR156h-3p_1ss8AC	comp33019_c0	comp33019_c0	sp|Q54RF3|EI2BE_DICDI Translation initiation factor eIF-2B subunit epsilon OS=Dictyostelium discoideum GN=eif2b5 PE=3 SV=1	GO:0005851(eukaryotic translation initiation factor 2B complex);GO:0043614(multi-eIF complex);GO:0005488(binding);GO:0005085(guanyl-nucleotide exchange factor activity);GO:0016779(nucleotidyltransferase activity);GO:0009058(biosynthetic process);GO:0016070(RNA metabolic process)
mtr-miR156h-3p_1ss8AC	comp34143_c0	comp34143_c0	sp|Q9FH80|BAM8_ARATH Beta-amylase 8 OS=Arabidopsis thaliana GN=BAM8 PE=2 SV=1	GO:0005737(cytoplasm);GO:0016161(beta-amylase activity);GO:0043169(cation binding);GO:0000272(polysaccharide catabolic process)
mtr-miR156h-3p_1ss8AC	comp306802_c0	comp306802_c0	-
mtr-miR156h-3p_1ss8AC	comp3318_c0	comp3318_c0	-
mtr-miR156h-3p_1ss8AC	comp865215_c0	comp865215_c0	-
mtr-miR156h-3p_1ss8AC	comp56709_c0	comp56709_c0	sp|Q8LGU6|CD27B_ARATH Cell division cycle protein 27 homolog B OS=Arabidopsis thaliana GN=CDC27B PE=1 SV=1	GO:0005680(anaphase-promoting complex);GO:0009504(cell plate);GO:0005819(spindle);GO:0005515(protein binding);GO:0030154(cell differentiation);GO:0051301(cell division);GO:0007276(gamete generation);GO:0007067(mitosis);GO:0051302(regulation of cell division);GO:0007346(regulation of mitotic cell cycle);GO:0051510(regulation of unidimensional cell growth);GO:0009733(response to auxin stimulus);GO:…	ko04110(Cell cycle);ko04114(Oocyte meiosis);ko04120(Ubiquitin mediated proteolysis);ko04914(Progesterone-mediated oocyte maturation)
mtr-miR156h-3p_1ss8AC	comp64251_c0	comp64251_c0	sp|Q9USJ9|MNP1_SCHPO 54S ribosomal protein L12, mitochondrial OS=Schizosaccharomyces pombe (strain 972 / ATCC 24843) GN=mnp1 PE=3 SV=2	GO:0005739(mitochondrion);GO:0005840(ribosome);GO:0003735(structural constituent of ribosome);GO:0006412(translation)	ko03010(Ribosome)
mtr-miR156h-3p_1ss8AC	comp43232_c0	comp43232_c0	sp|Q9NX01|TXN4B_HUMAN Thioredoxin-like protein 4B OS=Homo sapiens GN=TXNL4B PE=1 SV=1	GO:0005681(spliceosomal complex);GO:0007067(mitosis);GO:0006397(mRNA processing);GO:0008380(RNA splicing)
mtr-miR156h-3p_1ss8AC	comp42946_c1	comp42946_c1	-
mtr-miR156h-3p_1ss8AC	comp6463_c0	comp6463_c0	-
mtr-miR156h-3p_1ss8AC	comp29207_c0	comp29207_c0	-
mtr-miR156h-3p_1ss8AC	comp68498_c0	comp68498_c0	sp|P04825|AMPN_ECOLI Aminopeptidase N OS=Escherichia coli (strain K12) GN=pepN PE=1 SV=2	GO:0005886(plasma membrane);GO:0004177(aminopeptidase activity);GO:0008237(metallopeptidase activity);GO:0008270(zinc ion binding);GO:0006508(proteolysis)	ko00480(Glutathione metabolism)
mtr-miR156h-3p_1ss8AC	comp67512_c0	comp67512_c0	sp|P48417|CP74_LINUS Allene oxide synthase, chloroplastic OS=Linum usitatissimum GN=CYP74A PE=1 SV=1	GO:0009507(chloroplast);GO:0009055(electron carrier activity);GO:0020037(heme binding);GO:0047987(hydroperoxide dehydratase activity);GO:0004497(monooxygenase activity);GO:0016705(oxidoreductase activity, acting on paired donors, with incorporation or reduction of molecular oxygen);GO:0031408(oxylipin biosynthetic process)	ko00592(alpha-Linolenic acid metabolism)
mtr-miR156h-3p_1ss8AC	comp67871_c0	comp67871_c0	sp|Q9SD33|U183_ARATH UPF0183 protein At3g51130 OS=Arabidopsis thaliana GN=At3g51130 PE=2 SV=2
mtr-miR156h-3p_1ss8AC	comp66099_c0	comp66099_c0	-
mtr-miR156h-3p_1ss8AC	comp68112_c0	comp68112_c0	-
mtr-miR156h-3p_1ss8AC	comp63726_c1	comp63726_c1	sp|Q6S003|KIF8_DICDI Kinesin-related protein 8 OS=Dictyostelium discoideum GN=kif8 PE=2 SV=1	GO:0005737(cytoplasm);GO:0005874(microtubule);GO:0005524(ATP binding);GO:0003777(microtubule motor activity);GO:0051301(cell division);GO:0007018(microtubule-based movement);GO:0007067(mitosis);GO:0006810(transport)
mtr-miR156h-3p_1ss8AC	comp68428_c0	comp68428_c0	sp|P30015|LHR_ECOLI Probable ATP-dependent helicase lhr OS=Escherichia coli (strain K12) GN=lhr PE=3 SV=2	GO:0005524(ATP binding);GO:0008026(ATP-dependent helicase activity);GO:0003676(nucleic acid binding)	ko00970(Aminoacyl-tRNA biosynthesis)
mtr-miR156h-3p_1ss8AC	comp38384_c0	comp38384_c0	sp|Q5R7X2|SR140_PONAB U2 snRNP-associated SURP motif-containing protein OS=Pongo abelii GN=U2SURP PE=2 SV=1	GO:0005634(nucleus);GO:0000166(nucleotide binding);GO:0003723(RNA binding);GO:0006396(RNA processing)
mtr-miR156h-3p_1ss8AC	comp57349_c0	comp57349_c0	-		ko03410(Base excision repair)
mtr-miR156h-3p_1ss8AC	comp442757_c0	comp442757_c0	-
mtr-miR156h-3p_1ss8AC	comp48779_c0	comp48779_c0	sp|Q8GYB1|NUD15_ARATH Nudix hydrolase 15, mitochondrial OS=Arabidopsis thaliana GN=NUDT15 PE=1 SV=2	GO:0005739(mitochondrion);GO:0010945(CoA pyrophosphatase activity);GO:0046872(metal ion binding)
mtr-miR156h-3p_1ss8AC	comp365602_c0	comp365602_c0	-
mtr-miR156h-3p_1ss8AC	comp48563_c0	comp48563_c0	-
mtr-miR156h-3p_1ss8AC	comp61273_c0	comp61273_c0	-
mtr-miR156h-3p_1ss8AC	comp14697_c0	comp14697_c0	-
mtr-miR156h-3p_1ss8AC	comp41899_c0	comp41899_c0	-
mtr-miR156h-3p_1ss8AC	comp65013_c0	comp65013_c0	sp|Q8GX84|C3H1_ARATH Zinc finger CCCH domain-containing protein 1 OS=Arabidopsis thaliana GN=At1g01350 PE=2 SV=2	GO:0003677(DNA binding);GO:0008270(zinc ion binding)
mtr-miR156h-3p_1ss8AC	comp68539_c0	comp68539_c0	sp|P46837|YHGF_ECOLI Protein YhgF OS=Escherichia coli (strain K12) GN=yhgF PE=1 SV=3	GO:0016788(hydrolase activity, acting on ester bonds);GO:0003723(RNA binding);GO:0006139(nucleobase, nucleoside, nucleotide and nucleic acid metabolic process)	ko00230(Purine metabolism);ko00250(Alanine,ko aspartate and glutamate metabolism)
mtr-miR156h-3p_1ss8AC	comp270_c0	comp270_c0	-
mtr-miR156h-3p_1ss8AC	comp42634_c0	comp42634_c0	-		ko03018(RNA degradation)
mtr-miR156h-3p_1ss8AC	comp36166_c1	comp36166_c1	-
mtr-miR156h-3p_1ss8AC	comp53850_c0	comp53850_c0	-
mtr-miR156h-3p_1ss8AC	comp352550_c0	comp352550_c0	-
mtr-miR156h-3p_1ss8AC	comp60121_c0	comp60121_c0	sp|Q9SIZ8|RKP_ARATH E3 ubiquitin-protein ligase RKP OS=Arabidopsis thaliana GN=RKP PE=2 SV=2	GO:0016021(integral to membrane);GO:0000151(ubiquitin ligase complex);GO:0034450(ubiquitin-ubiquitin ligase activity);GO:0008270(zinc ion binding);GO:0060154(cellular process regulating host cell cycle in response to virus);GO:0006511(ubiquitin-dependent protein catabolic process)
mtr-miR156h-3p_1ss8AC	comp48565_c0	comp48565_c0	-
mtr-miR156h-3p_1ss8AC	comp53393_c0	comp53393_c0	sp|Q8VZ67|Y4919_ARATH Uncharacterized zinc finger CCHC domain-containing protein At4g19190 OS=Arabidopsis thaliana GN=At4g19190 PE=2 SV=1	GO:0003676(nucleic acid binding);GO:0008270(zinc ion binding)
mtr-miR156h-3p_1ss8AC	comp27330_c0	comp27330_c0	-
mtr-miR156h-3p_1ss8AC	comp166176_c0	comp166176_c0	sp|Q0WP01|PTR9_ARATH Probable peptide/nitrate transporter At1g22540 OS=Arabidopsis thaliana GN=At1g22540 PE=2 SV=1	GO:0016021(integral to membrane);GO:0005215(transporter activity);GO:0006857(oligopeptide transport)
mtr-miR156h-3p_1ss8AC	comp30521_c0	comp30521_c0	-
mtr-miR156h-3p_1ss8AC	comp67526_c0	comp67526_c0	sp|P09546|PUTA_ECOLI Bifunctional protein PutA OS=Escherichia coli (strain K12) GN=putA PE=1 SV=3	GO:0003842(1-pyrroline-5-carboxylate dehydrogenase activity);GO:0003677(DNA binding);GO:0050660(flavin adenine dinucleotide binding);GO:0016620(oxidoreductase activity, acting on the aldehyde or oxo group of donors, NAD or NADP as acceptor);GO:0004657(proline dehydrogenase activity);GO:0003700(sequence-specific DNA binding transcription factor activity);GO:0006537(glutamate biosynthetic process);…	ko00260(Glycine,ko serine and threonine metabolism)
mtr-miR156h-3p_1ss8AC	comp3017_c0	comp3017_c0	sp|O16797|RL3_DROME 60S ribosomal protein L3 OS=Drosophila melanogaster GN=RpL3 PE=2 SV=3	GO:0005840(ribosome);GO:0003735(structural constituent of ribosome);GO:0000022(mitotic spindle elongation);GO:0006412(translation)	ko03010(Ribosome)
mtr-miR156h-3p_1ss8AC	comp109652_c0	comp109652_c0	-
mtr-miR156h-3p_1ss8AC	comp66026_c0	comp66026_c0	sp|P30131|HYPF_ECOLI Carbamoyltransferase HypF OS=Escherichia coli (strain K12) GN=hypF PE=1 SV=2	GO:0016743(carboxyl- or carbamoyltransferase activity);GO:0008270(zinc ion binding);GO:0046944(protein carbamoylation);GO:0051604(protein maturation)	ko04146(Peroxisome)
mtr-miR156h-3p_1ss8AC	comp64944_c0	comp64944_c0	-
mtr-miR156h-3p_1ss8AC	comp3530_c0	comp3530_c0	-
mtr-miR156h-3p_1ss8AC	comp51992_c0	comp51992_c0	-
mtr-miR156h-3p_1ss8AC	comp34020_c0	comp34020_c0	-
mtr-miR156h-3p_1ss8AC	comp46434_c0	comp46434_c0	-		ko00330(Arginine and proline metabolism)
mtr-miR156h-3p_1ss8AC	comp61995_c0	comp61995_c0	sp|Q9SG92|MES17_ARATH Methylesterase 17 OS=Arabidopsis thaliana GN=MES17 PE=1 SV=1		ko00901(Indole alkaloid biosynthesis)
mtr-miR156h-3p_1ss8AC	comp245059_c0	comp245059_c0	-
mtr-miR156h-3p_1ss8AC	comp59873_c0	comp59873_c0	sp|Q9SD39|PMTR_ARATH Probable methyltransferase PMT27 OS=Arabidopsis thaliana GN=At3g51070 PE=3 SV=1	GO:0005789(endoplasmic reticulum membrane);GO:0016021(integral to membrane);GO:0008168(methyltransferase activity)
mtr-miR156h-3p_1ss8AC	comp174227_c0	comp174227_c0	sp|Q9ZQ34|Y2433_ARATH Uncharacterized protein At2g24330 OS=Arabidopsis thaliana GN=At2g24330 PE=2 SV=1
mtr-miR156h-3p_1ss8AC	comp45874_c0	comp45874_c0	sp|Q9SYM9|Y1853_ARATH Receptor-like serine/threonine-protein kinase At1g78530 OS=Arabidopsis thaliana GN=At1g78530 PE=2 SV=1	GO:0016021(integral to membrane);GO:0005886(plasma membrane);GO:0005524(ATP binding);GO:0004674(protein serine/threonine kinase activity);GO:0004872(receptor activity)
mtr-miR156h-3p_1ss8AC	comp583331_c0	comp583331_c0	-
mtr-miR156h-3p_1ss8AC	comp45375_c0	comp45375_c0	-
mtr-miR156h-3p_1ss8AC	comp47273_c0	comp47273_c0	-
mtr-miR156h-3p_1ss8AC	comp104558_c0	comp104558_c0	-
mtr-miR156h-3p_1ss8AC	comp40839_c0	comp40839_c0	sp|Q9HCS7|SYF1_HUMAN Pre-mRNA-splicing factor SYF1 OS=Homo sapiens GN=XAB2 PE=1 SV=2	GO:0071013(catalytic step 2 spliceosome);GO:0005654(nucleoplasm);GO:0005515(protein binding);GO:0000398(nuclear mRNA splicing, via spliceosome);GO:0006351(transcription, DNA-dependent);GO:0006283(transcription-coupled nucleotide-excision repair)
mtr-miR156h-3p_1ss8AC	comp46913_c0	comp46913_c0	-
mtr-miR156h-3p_1ss8AC	comp14583_c0	comp14583_c0	-
mtr-miR156h-3p_1ss8AC	comp38602_c0	comp38602_c0	-
mtr-miR156h-3p_1ss8AC	comp8489_c0	comp8489_c0	sp|Q8VYR7|BOR1_ARATH Boron transporter 1 OS=Arabidopsis thaliana GN=BOR1 PE=1 SV=1	GO:0043674(columella);GO:0005768(endosome);GO:0016021(integral to membrane);GO:0016328(lateral plasma membrane);GO:0005773(vacuole);GO:0080139(borate efflux transmembrane transporter activity);GO:0005452(inorganic anion exchanger activity);GO:0010036(response to boron-containing substance)
mtr-miR156h-3p_1ss8AC	comp15101_c0	comp15101_c0	-
mtr-miR156h-3p_1ss8AC	comp67895_c0	comp67895_c0	sp|Q46915|GUDX_ECOLI Glucarate dehydratase-related protein OS=Escherichia coli (strain K12) GN=gudX PE=1 SV=1	GO:0016829(lyase activity);GO:0046872(metal ion binding);GO:0009063(cellular amino acid catabolic process)
mtr-miR156h-3p_1ss8AC	comp286171_c0	comp286171_c0	sp|P93822|ERF97_ARATH Ethylene-responsive transcription factor 14 OS=Arabidopsis thaliana GN=ERF14 PE=2 SV=1	GO:0005634(nucleus);GO:0003677(DNA binding);GO:0003700(sequence-specific DNA binding transcription factor activity);GO:0006952(defense response);GO:0009873(ethylene mediated signaling pathway)
mtr-miR156h-3p_1ss8AC	comp382047_c0	comp382047_c0	-
mtr-miR156h-3p_1ss8AC	comp41803_c0	comp41803_c0	-
mtr-miR156h-3p_1ss8AC	comp50959_c0	comp50959_c0	-
mtr-miR156h-3p_1ss8AC	comp44495_c0	comp44495_c0	-
mtr-miR156h-3p_1ss8AC	comp47233_c0	comp47233_c0	-
mtr-miR156h-3p_1ss8AC	comp52305_c0	comp52305_c0	sp|O14578|CTRO_HUMAN Citron Rho-interacting kinase OS=Homo sapiens GN=CIT PE=1 SV=2	GO:0005524(ATP binding);GO:0046872(metal ion binding);GO:0004674(protein serine/threonine kinase activity);GO:0017124(SH3 domain binding);GO:0005083(small GTPase regulator activity);GO:0033205(cell cycle cytokinesis);GO:0035556(intracellular signal transduction)
mtr-miR156h-3p_1ss8AC	comp66449_c0	comp66449_c0	sp|P80497|ATPY_SOLTU ATP synthase 6 kDa subunit, mitochondrial (Fragment) OS=Solanum tuberosum PE=1 SV=1	GO:0005743(mitochondrial inner membrane);GO:0045263(proton-transporting ATP synthase complex, coupling factor F);GO:0015992(proton transport)
mtr-miR156h-3p_1ss8AC	comp29512_c0	comp29512_c0	-
mtr-miR156h-3p_1ss8AC	comp47474_c0	comp47474_c0	-
mtr-miR156h-3p_1ss8AC	comp53244_c0	comp53244_c0	sp|Q6AWY6|GRF3_ORYSJ Growth-regulating factor 3 OS=Oryza sativa subsp. japonica GN=GRF3 PE=3 SV=2
mtr-miR156h-3p_1ss8AC	comp65213_c1	comp65213_c1	-
mtr-miR156h-3p_1ss8AC	comp37092_c0	comp37092_c0	-
mtr-miR156h-3p_1ss8AC	comp64180_c0	comp64180_c0	sp|P19244|HSP41_PEA 22.7 kDa class IV heat shock protein OS=Pisum sativum GN=HSP22.7 PE=2 SV=1	GO:0005788(endoplasmic reticulum lumen);GO:0006950(response to stress)
mtr-miR156h-3p_1ss8AC	comp47238_c0	comp47238_c0	-
mtr-miR156h-3p_1ss8AC	comp62094_c0	comp62094_c0	-
mtr-miR156h-3p_1ss8AC	comp63911_c0	comp63911_c0	sp|Q9Z8P2|FABG_CHLPN 3-oxoacyl-[acyl-carrier-protein] reductase FabG OS=Chlamydia pneumoniae GN=fabG PE=3 SV=1	GO:0004316(3-oxoacyl-[acyl-carrier-protein] reductase );GO:0051287(NAD binding);GO:0006633(fatty acid biosynthetic process)	ko00061(Fatty acid biosynthesis);ko01040(Biosynthesis of unsaturated fatty acids)
mtr-miR156h-3p_1ss8AC	comp46728_c0	comp46728_c0	-
mtr-miR156h-3p_1ss8AC	comp37467_c0	comp37467_c0	-
mtr-miR156h-3p_1ss8AC	comp63671_c0	comp63671_c0	-
mtr-miR156h-3p_1ss8AC	comp54427_c0	comp54427_c0	-
mtr-miR156h-3p_1ss8AC	comp35068_c0	comp35068_c0	sp|Q9LJP4|CSLC4_ARATH Xyloglucan glycosyltransferase 4 OS=Arabidopsis thaliana GN=CSLC4 PE=1 SV=1	GO:0000139(Golgi membrane);GO:0016021(integral to membrane);GO:0005886(plasma membrane);GO:0016757(transferase activity, transferring glycosyl groups);GO:0007047(cellular cell wall organization)
mtr-miR156h-3p_1ss8AC	comp47265_c0	comp47265_c0	sp|Q84TI3|OBE4_ARATH Protein OBERON 4 OS=Arabidopsis thaliana GN=OBE4 PE=1 SV=2	GO:0005634(nucleus);GO:0046872(metal ion binding);GO:0005515(protein binding)
mtr-miR156h-3p_1ss8AC	comp1030127_c0	comp1030127_c0	-
mtr-miR156h-3p_1ss8AC	comp48589_c0	comp48589_c0	-
mtr-miR156h-3p_1ss8AC	comp66642_c0	comp66642_c0	-
mtr-miR156h-3p_1ss8AC	comp38093_c0	comp38093_c0	-
mtr-miR156h-3p_1ss8AC	comp52832_c0	comp52832_c0	-
mtr-miR156h-3p_1ss8AC	comp35366_c0	comp35366_c0	sp|O64639|Y2559_ARATH Receptor-like serine/threonine-protein kinase At2g45590 OS=Arabidopsis thaliana GN=At2g45590 PE=2 SV=1	GO:0016021(integral to membrane);GO:0005886(plasma membrane);GO:0005524(ATP binding);GO:0004674(protein serine/threonine kinase activity);GO:0004872(receptor activity)	ko00270(Cysteine and methionine metabolism)
mtr-miR156h-3p_1ss8AC	comp29712_c0	comp29712_c0	sp|Q944A7|Y4523_ARATH Probable serine/threonine-protein kinase At4g35230 OS=Arabidopsis thaliana GN=At4g35230 PE=1 SV=1	GO:0005886(plasma membrane);GO:0009506(plasmodesma);GO:0005773(vacuole);GO:0005524(ATP binding);GO:0005515(protein binding);GO:0004674(protein serine/threonine kinase activity);GO:0009742(brassinosteroid mediated signaling pathway);GO:0009737(response to abscisic acid stimulus)
mtr-miR156h-3p_1ss8AC	comp64598_c0	comp64598_c0	sp|Q9LW50|ERF2_NICSY Ethylene-responsive transcription factor 2 OS=Nicotiana sylvestris GN=ERF2 PE=2 SV=1	GO:0005634(nucleus);GO:0003677(DNA binding);GO:0003700(sequence-specific DNA binding transcription factor activity);GO:0006952(defense response);GO:0009873(ethylene mediated signaling pathway)
mtr-miR156h-3p_1ss8AC	comp54816_c0	comp54816_c0	-
mtr-miR156h-3p_1ss8AC	comp38861_c0	comp38861_c0	-
mtr-miR156h-3p_1ss8AC	comp37484_c0	comp37484_c0	-
mtr-miR156h-3p_1ss8AC	comp58777_c0	comp58777_c0	sp|F4I8B9|Y1501_ARATH Putative WEB family protein At1g65010, chloroplastic OS=Arabidopsis thaliana GN=At1g65010 PE=1 SV=1
mtr-miR156h-3p_1ss8AC	comp195456_c0	comp195456_c0	-
mtr-miR156h-3p_1ss8AC	comp38079_c0	comp38079_c0	-
mtr-miR156h-3p_1ss8AC	comp60293_c0	comp60293_c0	sp|Q5RBU7|PCP_PONAB Lysosomal Pro-X carboxypeptidase OS=Pongo abelii GN=PRCP PE=2 SV=1	GO:0005764(lysosome);GO:0004180(carboxypeptidase activity);GO:0008236(serine-type peptidase activity);GO:0006508(proteolysis)
mtr-miR156h-3p_1ss8AC	comp45775_c0	comp45775_c0	sp|Q93WC4|IAA29_ARATH Auxin-responsive protein IAA29 OS=Arabidopsis thaliana GN=IAA29 PE=2 SV=2	GO:0005634(nucleus);GO:0046983(protein dimerization activity);GO:0009734(auxin mediated signaling pathway);GO:0006355(regulation of transcription, DNA-dependent);GO:0010218(response to far red light);GO:0010114(response to red light);GO:0006351(transcription, DNA-dependent)
mtr-miR156h-3p_1ss8AC	comp61154_c0	comp61154_c0	sp|Q9SCP6|U73D1_ARATH UDP-glycosyltransferase 73D1 OS=Arabidopsis thaliana GN=UGT73D1 PE=3 SV=1	GO:0016758(transferase activity, transferring hexosyl groups)
mtr-miR156h-3p_1ss8AC	comp54590_c0	comp54590_c0	-
mtr-miR156h-3p_1ss8AC	comp53991_c0	comp53991_c0	sp|Q9FMY1|C86B1_ARATH Cytochrome P450 86B1 OS=Arabidopsis thaliana GN=CYP86B1 PE=2 SV=1	GO:0005789(endoplasmic reticulum membrane);GO:0016021(integral to membrane);GO:0009055(electron carrier activity);GO:0020037(heme binding);GO:0004497(monooxygenase activity);GO:0016705(oxidoreductase activity, acting on paired donors, with incorporation or reduction of molecular oxygen);GO:0007047(cellular cell wall organization);GO:0010345(suberin biosynthetic process);GO:0042761(very long-chain…	ko00361(gamma-Hexachlorocyclohexane degradation);ko00626(Naphthalene and anthracene degradation);ko00903(Limonene and pinene degradation);ko00945(Stilbenoid,ko diarylheptanoid and gingerol biosynthesis)
mtr-miR156h-3p_1ss8AC	comp377526_c0	comp377526_c0	-
mtr-miR156h-3p_1ss8AC	comp60240_c0	comp60240_c0	sp|Q9M9S6|UTR3_ARATH UDP-galactose/UDP-glucose transporter 3 OS=Arabidopsis thaliana GN=UTR3 PE=1 SV=1
mtr-miR156h-3p_1ss8AC	comp67928_c0	comp67928_c0	sp|Q6NWJ4|DNJC2_DANRE DnaJ homolog subfamily C member 2 OS=Danio rerio GN=dnajc2 PE=2 SV=1	GO:0005829(cytosol);GO:0005634(nucleus);GO:0003682(chromatin binding);GO:0003677(DNA binding);GO:0031072(heat shock protein binding);GO:0042393(histone binding);GO:0043130(ubiquitin binding);GO:0016568(chromatin modification);GO:0045893(positive regulation of transcription, DNA-dependent);GO:0006351(transcription, DNA-dependent)
mtr-miR156h-3p_1ss8AC	comp55929_c0	comp55929_c0	sp|Q9ZPH9|PMTF_ARATH Probable methyltransferase PMT15 OS=Arabidopsis thaliana GN=At4g00750 PE=1 SV=1	GO:0000139(Golgi membrane);GO:0016021(integral to membrane);GO:0008168(methyltransferase activity)
mtr-miR156h-3p_1ss8AC	comp327795_c0	comp327795_c0	-
mtr-miR156h-3p_1ss8AC	comp57711_c0	comp57711_c0	-
mtr-miR156h-3p_1ss8AC	comp66938_c0	comp66938_c0	-
mtr-miR156h-3p_1ss8AC	comp142671_c0	comp142671_c0	-
mtr-miR156h-3p_1ss8AC	comp412133_c0	comp412133_c0	-
mtr-miR156h-3p_1ss8AC	comp31062_c0	comp31062_c0	sp|Q9XIN8|FB119_ARATH F-box protein At2g27310 OS=Arabidopsis thaliana GN=At2g27310 PE=2 SV=1
mtr-miR156h-3p_1ss8AC	comp39010_c0	comp39010_c0	-
mtr-miR156h-3p_1ss8AC	comp65202_c0	comp65202_c0	-
mtr-miR156h-3p_1ss8AC	comp58324_c0	comp58324_c0	sp|Q9CA27|EF118_ARATH Ethylene-responsive transcription factor ERF118 OS=Arabidopsis thaliana GN=ERF118 PE=2 SV=1	GO:0005634(nucleus);GO:0003677(DNA binding);GO:0003700(sequence-specific DNA binding transcription factor activity);GO:0009873(ethylene mediated signaling pathway)
mtr-miR156h-3p_1ss8AC	comp64491_c0	comp64491_c0	sp|Q5Z9Z0|BGL24_ORYSJ Beta-glucosidase 24 OS=Oryza sativa subsp. japonica GN=BGLU24 PE=2 SV=1	GO:0008422(beta-glucosidase activity);GO:0043169(cation binding);GO:0005975(carbohydrate metabolic process)	ko00460(Cyanoamino acid metabolism);ko00500(Starch and sucrose metabolism);ko00940(Phenylpropanoid biosynthesis)
mtr-miR156h-3p_1ss8AC	comp50246_c0	comp50246_c0	sp|P29344|RR1_SPIOL 30S ribosomal protein S1, chloroplastic OS=Spinacia oleracea GN=RPS1 PE=1 SV=1	GO:0009507(chloroplast);GO:0005840(ribosome);GO:0003723(RNA binding);GO:0003735(structural constituent of ribosome);GO:0006412(translation)	ko03010(Ribosome)
mtr-miR156h-3p_1ss8AC	comp49682_c0	comp49682_c0	-
mtr-miR156h-3p_1ss8AC	comp62895_c0	comp62895_c0	sp|O66601|GUAA_AQUAE GMP synthase [glutamine-hydrolyzing] OS=Aquifex aeolicus (strain VF5) GN=guaA PE=3 SV=1	GO:0004066(asparagine synthase );GO:0005524(ATP binding);GO:0003922(GMP synthase );GO:0006529(asparagine biosynthetic process);GO:0006541(glutamine metabolic process);GO:0006177(GMP biosynthetic process)	ko00230(Purine metabolism);ko00983(Drug metabolism - other enzymes)
mtr-miR156h-3p_1ss8AC	comp64891_c0	comp64891_c0	-
mtr-miR156h-3p_1ss8AC	comp60482_c0	comp60482_c0	-
mtr-miR156h-3p_1ss8AC	comp64910_c0	comp64910_c0	-
mtr-miR156h-3p_1ss8AC	comp8077_c0	comp8077_c0	sp|P52855|RLA1_MAIZE 60S acidic ribosomal protein P1 OS=Zea mays GN=RPP1A PE=1 SV=1	GO:0003735(structural constituent of ribosome);GO:0006414(translational elongation)	ko03010(Ribosome)
mtr-miR156h-3p_1ss8AC	comp30085_c0	comp30085_c0	-
mtr-miR156h-3p_1ss8AC	comp61248_c0	comp61248_c0	-
mtr-miR156h-3p_1ss8AC	comp67333_c0	comp67333_c0	sp|Q7DM58|AB4C_ARATH ABC transporter C family member 4 OS=Arabidopsis thaliana GN=ABCC4 PE=1 SV=2	GO:0016021(integral to membrane);GO:0000325(plant-type vacuole);GO:0005886(plasma membrane);GO:0009506(plasmodesma);GO:0005774(vacuolar membrane);GO:0005524(ATP binding);GO:0008517(folic acid transporter activity);GO:0008559(xenobiotic-transporting ATPase activity);GO:0009624(response to nematode);GO:0009414(response to water deprivation);GO:0009611(response to wounding);GO:0010118(stomatal movem…	ko02010(ABC transporters)
mtr-miR156h-3p_1ss8AC	comp54875_c0	comp54875_c0	sp|P81760|TL17_ARATH Thylakoid lumenal 17.4 kDa protein, chloroplastic OS=Arabidopsis thaliana GN=At5g53490 PE=1 SV=2	GO:0009570(chloroplast stroma);GO:0009543(chloroplast thylakoid lumen);GO:0009535(chloroplast thylakoid membrane);GO:0005515(protein binding)
mtr-miR156h-3p_1ss8AC	comp58864_c0	comp58864_c0	-
mtr-miR156h-3p_1ss8AC	comp57941_c0	comp57941_c0	sp|Q0DJV6|CML18_ORYSJ Probable calcium-binding protein CML18 OS=Oryza sativa subsp. japonica GN=CML18 PE=2 SV=1	GO:0005509(calcium ion binding)	ko04020(Calcium signaling pathway);ko04070(Phosphatidylinositol signaling system);ko04114(Oocyte meiosis);ko04270(Vascular smooth muscle contraction);ko04626(Plant-pathogen interaction);ko04720(Long-term potentiation);ko04722(Neurotrophin signaling pathway);ko04740(Olfactory transduction);ko04744(Phototransduction);ko04910(Insulin signaling pathway);ko04912(GnRH signaling pathway);ko04916(Melanog…
mtr-miR156h-3p_1ss8AC	comp55206_c0	comp55206_c0	sp|Q69ZQ2|ISY1_MOUSE Pre-mRNA-splicing factor ISY1 homolog OS=Mus musculus GN=Isy1 PE=1 SV=2	GO:0006397(mRNA processing);GO:0008380(RNA splicing)
mtr-miR156h-3p_1ss8AC	comp52907_c0	comp52907_c0	-
mtr-miR156h-3p_1ss8AC	comp55647_c0	comp55647_c0	sp|Q7XTQ5|MEX1_ORYSJ Maltose excess protein 1-like, chloroplastic OS=Oryza sativa subsp. japonica GN=Os04g0602400 PE=2 SV=2	GO:0009706(chloroplast inner membrane);GO:0016021(integral to membrane);GO:0000023(maltose metabolic process)
mtr-miR156h-3p_1ss8AC	comp61798_c0	comp61798_c0	-
mtr-miR156h-3p_1ss8AC	comp68546_c0	comp68546_c0	sp|P75793|PFLF_ECOLI Putative formate acetyltransferase 3 OS=Escherichia coli (strain K12) GN=ybiW PE=3 SV=1	GO:0005737(cytoplasm);GO:0008861(formate C-acetyltransferase activity);GO:0006006(glucose metabolic process)	ko00250(Alanine,ko aspartate and glutamate metabolism);ko00460(Cyanoamino acid metabolism);ko00910(Nitrogen metabolism)
mtr-miR156h-3p_1ss8AC	comp49234_c0	comp49234_c0	-
mtr-miR156h-3p_1ss8AC	comp41732_c0	comp41732_c0	-
mtr-miR156h-3p_1ss8AC	comp39720_c0	comp39720_c0	-
mtr-miR156h-3p_1ss8AC	comp56012_c0	comp56012_c0	-
mtr-miR156h-3p_1ss8AC	comp66938_c0	comp66938_c0	-
mtr-miR156h-3p_1ss8AC	comp616069_c0	comp616069_c0	-
mtr-miR156h-3p_1ss8AC	comp52310_c0	comp52310_c0	-
mtr-miR156h-3p_1ss8AC	comp11639_c0	comp11639_c0	-
mtr-miR156h-3p_1ss8AC	comp242334_c0	comp242334_c0	-
mtr-miR156h-3p_1ss8AC	comp40859_c0	comp40859_c0	-
mtr-miR156h-3p_1ss8AC	comp56158_c0	comp56158_c0	-
mtr-miR156h-3p_1ss8AC	comp24174_c0	comp24174_c0	-
mtr-miR156h-3p_1ss8AC	comp41842_c0	comp41842_c0	-
mtr-miR156h-3p_1ss8AC	comp61538_c0	comp61538_c0	-
mtr-miR156h-3p_1ss8AC	comp68513_c0	comp68513_c0	sp|P76655|YQIG_ECOLI Putative outer membrane usher protein YqiG OS=Escherichia coli (strain K12) GN=yqiG PE=5 SV=3	GO:0009279(cell outer membrane);GO:0016021(integral to membrane);GO:0005886(plasma membrane);GO:0005215(transporter activity)
mtr-miR156h-3p_1ss8AC	comp177968_c0	comp177968_c0	-
mtr-miR156h-3p_1ss8AC	comp38819_c0	comp38819_c0	-
mtr-miR156h-3p_1ss8AC	comp511399_c0	comp511399_c0	-
mtr-miR156h-3p_1ss8AC	comp46613_c0	comp46613_c0	-
mtr-miR156h-3p_1ss8AC	comp751326_c0	comp751326_c0	-
mtr-miR156h-3p_1ss8AC	comp12386_c0	comp12386_c0	sp|Q9ZQ98|U73C2_ARATH UDP-glycosyltransferase 73C2 OS=Arabidopsis thaliana GN=UGT73C2 PE=3 SV=1	GO:0016758(transferase activity, transferring hexosyl groups)
mtr-miR156h-3p_1ss8AC	comp495208_c0	comp495208_c0	-
mtr-miR156h-3p_1ss8AC	comp62876_c0	comp62876_c0	sp|P17639|EMB1_DAUCA EMB-1 protein OS=Daucus carota GN=EMB-1 PE=2 SV=1
mtr-miR156h-3p_1ss8AC	comp68127_c0	comp68127_c0	sp|P63285|CLPB_ECO57 Chaperone protein ClpB OS=Escherichia coli O157:H7 GN=clpB PE=3 SV=1	GO:0005737(cytoplasm);GO:0005524(ATP binding);GO:0017111(nucleoside-triphosphatase activity);GO:0016485(protein processing);GO:0009408(response to heat)
mtr-miR156h-3p_1ss8AC	comp13855_c0	comp13855_c0	-
mtr-miR156h-3p_1ss8AC	comp24662_c0	comp24662_c0	-
mtr-miR156h-3p_1ss8AC	comp52349_c0	comp52349_c0	-
mtr-miR156h-3p_1ss8AC	comp49888_c0	comp49888_c0	-
mtr-miR156h-3p_1ss8AC	comp665848_c0	comp665848_c0	-
mtr-miR156h-3p_1ss8AC	comp59729_c0	comp59729_c0	-
mtr-miR156h-3p_1ss8AC	comp61719_c0	comp61719_c0	sp|Q07187|EM1_ARATH Em-like protein GEA1 OS=Arabidopsis thaliana GN=EM1 PE=2 SV=1	GO:0009737(response to abscisic acid stimulus)
mtr-miR156h-3p_1ss8AC	comp49005_c0	comp49005_c0	-
mtr-miR156h-3p_1ss8AC	comp6106_c0	comp6106_c0	sp|Q9SUI2|PI5K7_ARATH Phosphatidylinositol 4-phosphate 5-kinase 7 OS=Arabidopsis thaliana GN=PIP5K7 PE=1 SV=1	GO:0005886(plasma membrane);GO:0016308(1-phosphatidylinositol-4-phosphate 5-kinase activity);GO:0005524(ATP binding)	ko00562(Inositol phosphate metabolism);ko04070(Phosphatidylinositol signaling system);ko04144(Endocytosis);ko04666(Fc gamma R-mediated phagocytosis);ko04810(Regulation of actin cytoskeleton)
mtr-miR156h-3p_1ss8AC	comp50307_c0	comp50307_c0	sp|Q93ZY2|ROGF1_ARATH Rop guanine nucleotide exchange factor 1 OS=Arabidopsis thaliana GN=ROPGEF1 PE=1 SV=2	GO:0016324(apical plasma membrane);GO:0005089(Rho guanyl-nucleotide exchange factor activity);GO:0009860(pollen tube growth)
mtr-miR156h-3p_1ss8AC	comp67898_c0	comp67898_c0	sp|P13458|SBCC_ECOLI Nuclease SbcCD subunit C OS=Escherichia coli (strain K12) GN=sbcC PE=1 SV=1	GO:0005524(ATP binding);GO:0004519(endonuclease activity);GO:0004527(exonuclease activity);GO:0006310(DNA recombination);GO:0006260(DNA replication)
mtr-miR156h-3p_1ss8AC	comp591709_c0	comp591709_c0	-
mtr-miR156h-3p_1ss8AC	comp54326_c0	comp54326_c0	sp|Q9FLB0|RH18_ARATH DEAD-box ATP-dependent RNA helicase 18 OS=Arabidopsis thaliana GN=RH18 PE=2 SV=1	GO:0005524(ATP binding);GO:0008026(ATP-dependent helicase activity);GO:0003723(RNA binding)
mtr-miR156h-3p_1ss8AC	comp30255_c0	comp30255_c0	-
mtr-miR156h-3p_1ss8AC	comp56564_c0	comp56564_c0	-
mtr-miR156h-3p_1ss8AC	comp68317_c0	comp68317_c0	sp|Q8FBP0|CYAA_ECOL6 Adenylate cyclase OS=Escherichia coli O6:H1 (strain CFT073 / ATCC 700928 / UPEC) GN=cyaA PE=3 SV=1	GO:0005737(cytoplasm);GO:0004016(adenylate cyclase activity);GO:0005524(ATP binding)	ko03420(Nucleotide excision repair)
mtr-miR156h-3p_1ss8AC	comp58242_c0	comp58242_c0	-
mtr-miR156h-3p_1ss8AC	comp49429_c0	comp49429_c0	-
mtr-miR156h-3p_1ss8AC	comp58632_c0	comp58632_c0	-
mtr-miR156h-3p_1ss8AC	comp41436_c0	comp41436_c0	-
mtr-miR156h-3p_1ss8AC	comp265883_c0	comp265883_c0	sp|Q84M97|MSL9_ARATH Mechanosensitive ion channel protein 9 OS=Arabidopsis thaliana GN=MSL9 PE=2 SV=1
mtr-miR156h-3p_1ss8AC	comp44486_c0	comp44486_c0	-
mtr-miR156h-3p_1ss8AC	comp66736_c0	comp66736_c0	sp|A2Z6W1|SPX3_ORYSI SPX domain-containing protein 3 OS=Oryza sativa subsp. indica GN=SPX3 PE=2 SV=1
mtr-miR156h-3p_1ss8AC	comp43157_c0	comp43157_c0	-
mtr-miR156h-3p_1ss8AC	comp70277_c0	comp70277_c0	-
mtr-miR156h-3p_1ss8AC	comp47842_c0	comp47842_c0	-
mtr-miR156h-3p_1ss8AC	comp56281_c0	comp56281_c0	-
mtr-miR156h-3p_1ss8AC	comp63644_c0	comp63644_c0	sp|P93788|REMO_SOLTU Remorin OS=Solanum tuberosum PE=1 SV=1	GO:0005886(plasma membrane);GO:0048032(galacturonate binding);GO:0007267(cell-cell signaling);GO:0006810(transport)
mtr-miR156h-3p_1ss8AC	comp26146_c0	comp26146_c0	-
mtr-miR156h-3p_1ss8AC	comp5429_c0	comp5429_c0	-
mtr-miR156h-3p_1ss8AC	comp8382_c0	comp8382_c0	-
mtr-miR156h-3p_1ss8AC	comp56471_c0	comp56471_c0	-
mtr-miR156h-3p_1ss8AC	comp52462_c0	comp52462_c0	-
mtr-miR156h-3p_1ss8AC	comp50488_c0	comp50488_c0	sp|P27397|HSP12_DAUCA 18.0 kDa class I heat shock protein OS=Daucus carota PE=3 SV=1	GO:0005737(cytoplasm);GO:0006950(response to stress)
mtr-miR156h-3p_1ss8AC	comp52231_c0	comp52231_c0	-
mtr-miR156h-3p_1ss8AC	comp22369_c0	comp22369_c0	-
mtr-miR156h-3p_1ss8AC	comp55519_c0	comp55519_c0	-
mtr-miR156h-3p_1ss8AC	comp63785_c0	comp63785_c0	-
mtr-miR156h-3p_1ss8AC	comp48421_c0	comp48421_c0	-
mtr-miR156h-3p_1ss8AC	comp33833_c0	comp33833_c0	-
mtr-miR156h-3p_1ss8AC	comp339864_c0	comp339864_c0	-
mtr-miR156h-3p_1ss8AC	comp47248_c0	comp47248_c0	-
mtr-miR156h-3p_1ss8AC	comp518364_c0	comp518364_c0	-
mtr-miR156h-3p_1ss8AC	comp42552_c0	comp42552_c0	sp|Q0V865|FAFL_ARATH Protein FAF-like, chloroplastic OS=Arabidopsis thaliana GN=At5g22090 PE=2 SV=1	GO:0009507(chloroplast)
mtr-miR156h-3p_1ss8AC	comp41665_c0	comp41665_c0	-
mtr-miR156h-3p_1ss8AC	comp28484_c0	comp28484_c0	-
mtr-miR156h-3p_1ss8AC	comp44711_c0	comp44711_c0	-
mtr-miR156h-3p_1ss8AC	comp68070_c0	comp68070_c0	sp|Q5RC80|RBM39_PONAB RNA-binding protein 39 OS=Pongo abelii GN=RBM39 PE=2 SV=1	GO:0016607(nuclear speck);GO:0000166(nucleotide binding);GO:0003723(RNA binding);GO:0006397(mRNA processing);GO:0006355(regulation of transcription, DNA-dependent);GO:0008380(RNA splicing);GO:0006351(transcription, DNA-dependent)	ko03022(Basal transcription factors)
mtr-miR156h-3p_1ss8AC	comp48234_c0	comp48234_c0	-
mtr-miR156h-3p_1ss8AC	comp142226_c0	comp142226_c0	-
mtr-miR156h-3p_1ss8AC	comp276221_c0	comp276221_c0	-
mtr-miR156h-3p_1ss8AC	comp21362_c0	comp21362_c0	-
mtr-miR156h-3p_1ss8AC	comp60229_c0	comp60229_c0	-
mtr-miR156h-3p_1ss8AC	comp1112_c0	comp1112_c0	-
mtr-miR156h-3p_1ss8AC	comp56965_c0	comp56965_c0	-
mtr-miR156h-3p_1ss8AC	comp62587_c0	comp62587_c0	-
mtr-miR156h-3p_1ss8AC	comp37406_c0	comp37406_c0	sp|Q9LDH1|SIB1_ARATH Sigma factor binding protein 1, chloroplastic OS=Arabidopsis thaliana GN=SIB1 PE=1 SV=1
mtr-miR156h-3p_1ss8AC	comp434330_c0	comp434330_c0	-
mtr-miR156h-3p_1ss8AC	comp52903_c0	comp52903_c0	-
mtr-miR156h-3p_1ss8AC	comp58930_c0	comp58930_c0	-
mtr-miR156h-3p_1ss8AC	comp65560_c0	comp65560_c0	sp|P0A3B2|TYPA_ECO27 GTP-binding protein TypA/BipA OS=Escherichia coli O127:H6 (strain E2348/69 / EPEC) GN=typA PE=3 SV=1	GO:0005622(intracellular);GO:0005525(GTP binding);GO:0003924(GTPase activity)
mtr-miR156h-3p_1ss8AC	comp662435_c0	comp662435_c0	sp|Q39203|SD22_ARATH G-type lectin S-receptor-like serine/threonine-protein kinase SD2-2 OS=Arabidopsis thaliana GN=SD22 PE=1 SV=1	GO:0016021(integral to membrane);GO:0044459(plasma membrane part);GO:0005524(ATP binding);GO:0005516(calmodulin binding);GO:0004674(protein serine/threonine kinase activity);GO:0004872(receptor activity);GO:0005529(sugar binding);GO:0048544(recognition of pollen)
mtr-miR156h-3p_1ss8AC	comp398680_c0	comp398680_c0	-
mtr-miR156h-3p_1ss8AC	comp418763_c0	comp418763_c0	-
mtr-miR156h-3p_1ss8AC	comp658471_c0	comp658471_c0	-
mtr-miR156h-3p_1ss8AC	comp54521_c0	comp54521_c0	-
mtr-miR156h-3p_1ss8AC	comp64262_c0	comp64262_c0	-
mtr-miR156h-3p_1ss8AC	comp60679_c0	comp60679_c0	sp|Q9FID5|Y5393_ARATH Probable receptor-like protein kinase At5g39030 OS=Arabidopsis thaliana GN=At5g39030 PE=2 SV=1	GO:0016021(integral to membrane);GO:0005524(ATP binding);GO:0004674(protein serine/threonine kinase activity)
mtr-miR156h-3p_1ss8AC	comp310353_c0	comp310353_c0	-
mtr-miR156h-3p_1ss8AC	comp65764_c1	comp65764_c1	sp|Q75A47|NOP14_ASHGO Probable nucleolar complex protein 14 OS=Ashbya gossypii (strain ATCC 10895 / CBS 109.51 / FGSC 9923 / NRRL Y-1056) GN=NOP14 PE=3 SV=1	GO:0005730(nucleolus);GO:0030515(snoRNA binding);GO:0042274(ribosomal small subunit biogenesis);GO:0006364(rRNA processing)
mtr-miR156h-3p_1ss8AC	comp65043_c0	comp65043_c0	sp|A8R7E6|CERK1_ARATH Chitin elicitor receptor kinase 1 OS=Arabidopsis thaliana GN=CERK1 PE=1 SV=1
mtr-miR156h-3p_1ss8AC	comp53061_c0	comp53061_c0	-
mtr-miR156h-3p_1ss8AC	comp63935_c0	comp63935_c0	-
mtr-miR156h-3p_1ss8AC	comp61428_c0	comp61428_c0	sp|Q9M5L0|RL35_EUPES 60S ribosomal protein L35 OS=Euphorbia esula GN=RPL35 PE=2 SV=1	GO:0005840(ribosome);GO:0003735(structural constituent of ribosome);GO:0006412(translation)	ko03010(Ribosome)
mtr-miR156h-3p_1ss8AC	comp520705_c0	comp520705_c0	sp|Q9FHK4|Y5519_ARATH Uncharacterized protein At5g05190 OS=Arabidopsis thaliana GN=Y-1 PE=1 SV=1
mtr-miR156h-3p_1ss8AC	comp54350_c0	comp54350_c0	-
mtr-miR156h-3p_1ss8AC	comp68089_c0	comp68089_c0	sp|P93004|PIP27_ARATH Aquaporin PIP2-7 OS=Arabidopsis thaliana GN=PIP2-7 PE=1 SV=2	GO:0046658(anchored to plasma membrane);GO:0016021(integral to membrane);GO:0005634(nucleus);GO:0009506(plasmodesma);GO:0005773(vacuole);GO:0015250(water channel activity);GO:0009737(response to abscisic acid stimulus)
mtr-miR156h-3p_1ss8AC	comp59820_c0	comp59820_c0	-
mtr-miR156h-3p_1ss8AC	comp43825_c0	comp43825_c0	sp|P16919|RHSD_ECOLI Protein RhsD OS=Escherichia coli (strain K12) GN=rhsD PE=2 SV=3
mtr-miR156h-3p_1ss8AC	comp152099_c0	comp152099_c0	-
mtr-miR156h-3p_1ss8AC	comp695218_c0	comp695218_c0	-
mtr-miR156h-3p_1ss8AC	comp64121_c0	comp64121_c0	sp|O23715|PSA3_ARATH Proteasome subunit alpha type-3 OS=Arabidopsis thaliana GN=PAG1 PE=1 SV=2	GO:0048046(apoplast);GO:0005829(cytosol);GO:0005634(nucleus);GO:0019773(proteasome core complex, alpha-subunit complex);GO:0005774(vacuolar membrane);GO:0004298(threonine-type endopeptidase activity);GO:0046686(response to cadmium ion);GO:0009409(response to cold);GO:0006511(ubiquitin-dependent protein catabolic process)	ko03050(Proteasome)
mtr-miR156h-3p_1ss8AC	comp48926_c0	comp48926_c0	sp|Q6YSJ5|AGO16_ORYSJ Protein argonaute 16 OS=Oryza sativa subsp. japonica GN=AGO16 PE=2 SV=2	GO:0003676(nucleic acid binding);GO:0031047(gene silencing by RNA)
mtr-miR156h-3p_1ss8AC	comp64534_c0	comp64534_c0	-
mtr-miR156h-3p_1ss8AC	comp28848_c0	comp28848_c0	-
mtr-miR156h-3p_1ss8AC	comp65281_c0	comp65281_c0	-
mtr-miR156h-3p_1ss8AC	comp62166_c0	comp62166_c0	-
mtr-miR156h-3p_1ss8AC	comp478941_c0	comp478941_c0	-
mtr-miR156h-3p_1ss8AC	comp522715_c0	comp522715_c0	-
mtr-miR156h-3p_1ss8AC	comp41551_c0	comp41551_c0	sp|F6HH45|TRM52_VITVI tRNA (guanine(37)-N1)-methyltransferase 2 OS=Vitis vinifera GN=VIT_11s0016g04350 PE=3 SV=1
mtr-miR156h-3p_1ss8AC	comp56606_c0	comp56606_c0	sp|Q9C660|PEK10_ARATH Proline-rich receptor-like protein kinase PERK10 OS=Arabidopsis thaliana GN=PERK10 PE=1 SV=2	GO:0016021(integral to membrane);GO:0005886(plasma membrane);GO:0005524(ATP binding);GO:0004674(protein serine/threonine kinase activity)
mtr-miR156h-3p_1ss8AC	comp68082_c0	comp68082_c0	sp|Q8GWW7|AGUA_ARATH Agmatine deiminase OS=Arabidopsis thaliana GN=AIH PE=1 SV=2	GO:0047632(agmatine deiminase activity);GO:0009446(putrescine biosynthetic process)	ko00330(Arginine and proline metabolism)
mtr-miR156h-3p_1ss8AC	comp55994_c0	comp55994_c0	-
mtr-miR156h-3p_1ss8AC	comp65662_c0	comp65662_c0	sp|P27788|FER3_MAIZE Ferredoxin-3, chloroplastic OS=Zea mays GN=FDX3 PE=2 SV=1	GO:0009507(chloroplast);GO:0051537(2 iron, 2 sulfur cluster binding);GO:0009055(electron carrier activity);GO:0046872(metal ion binding);GO:0022900(electron transport chain);GO:0006810(transport)	ko00195(Photosynthesis)
mtr-miR156h-3p_1ss8AC	comp57336_c0	comp57336_c0	-
mtr-miR156h-3p_1ss8AC	comp68067_c0	comp68067_c0	sp|Q94FT4|SALAT_PAPSO Salutaridinol 7-O-acetyltransferase OS=Papaver somniferum GN=SALAT PE=1 SV=1	GO:0047180(salutaridinol 7-O-acetyltransferase activity);GO:0009820(alkaloid metabolic process)
mtr-miR156h-3p_1ss8AC	comp51313_c0	comp51313_c0	sp|Q09020|PR4_PHAVU Wound-induced basic protein OS=Phaseolus vulgaris GN=PR4 PE=2 SV=1
mtr-miR156h-3p_1ss8AC	comp67147_c2	comp67147_c2	sp|Q39817|CALX_SOYBN Calnexin homolog OS=Glycine max PE=2 SV=1	GO:0005789(endoplasmic reticulum membrane);GO:0016021(integral to membrane);GO:0005509(calcium ion binding);GO:0005529(sugar binding);GO:0051082(unfolded protein binding);GO:0006457(protein folding)	ko04145(Phagosome);ko04612(Antigen processing and presentation)
mtr-miR156h-3p_1ss8AC	comp58406_c0	comp58406_c0	sp|Q2HJH0|LSM5_BOVIN U6 snRNA-associated Sm-like protein LSm5 OS=Bos taurus GN=LSM5 PE=3 SV=3	GO:0005634(nucleus);GO:0030529(ribonucleoprotein complex);GO:0003723(RNA binding);GO:0006397(mRNA processing);GO:0008380(RNA splicing)
mtr-miR156h-3p_1ss8AC	comp92936_c0	comp92936_c0	sp|P0C5H5|GAOX2_ORYSI Gibberellin 20 oxidase 2 OS=Oryza sativa subsp. indica GN=20ox2 PE=1 SV=1	GO:0005506(iron ion binding);GO:0016706(oxidoreductase activity, acting on paired donors, with incorporation or reduction of molecular oxygen, 2-oxoglutarate as one donor, and incorporation of one atom each of oxygen into both donors)	ko00904(Diterpenoid biosynthesis)
mtr-miR156h-3p_1ss8AC	comp39720_c0	comp39720_c0	-
mtr-miR156h-3p_1ss8AC	comp29333_c0	comp29333_c0	-
mtr-miR156h-3p_1ss8AC	comp51777_c0	comp51777_c0	sp|Q93ZL5|CDF2_ARATH Cyclic dof factor 2 OS=Arabidopsis thaliana GN=CDF2 PE=1 SV=2	GO:0005634(nucleus);GO:0003677(DNA binding);GO:0005515(protein binding);GO:0008270(zinc ion binding);GO:0006355(regulation of transcription, DNA-dependent);GO:0006351(transcription, DNA-dependent)
mtr-miR156h-3p_1ss8AC	comp55327_c0	comp55327_c0	-
mtr-miR156h-3p_1ss8AC	comp58414_c0	comp58414_c0	-
mtr-miR156h-3p_1ss8AC	comp50802_c0	comp50802_c0	-
mtr-miR156h-3p_1ss8AC	comp55069_c0	comp55069_c0	sp|Q38879|TRXH2_ARATH Thioredoxin H2 OS=Arabidopsis thaliana GN=TRX2 PE=2 SV=2	GO:0005829(cytosol);GO:0005739(mitochondrion);GO:0005886(plasma membrane);GO:0009055(electron carrier activity);GO:0016671(oxidoreductase activity, acting on a sulfur group of donors, disulfide as acceptor);GO:0015035(protein disulfide oxidoreductase activity);GO:0045454(cell redox homeostasis);GO:0022900(electron transport chain);GO:0006662(glycerol ether metabolic process);GO:0000103(sulfate as…
mtr-miR156h-3p_1ss8AC	comp53887_c0	comp53887_c0	-
mtr-miR156h-3p_1ss8AC	comp45464_c0	comp45464_c0	sp|O80366|ARR9_ARATH Two-component response regulator ARR9 OS=Arabidopsis thaliana GN=ARR9 PE=1 SV=1	GO:0005634(nucleus);GO:0005515(protein binding);GO:0000156(two-component response regulator activity);GO:0007623(circadian rhythm);GO:0009736(cytokinin mediated signaling pathway);GO:0006355(regulation of transcription, DNA-dependent);GO:0006351(transcription, DNA-dependent)	ko04712(Circadian rhythm - plant)
mtr-miR156h-3p_1ss8AC	comp68515_c0	comp68515_c0	sp|Q7XT99|AKR2_ORYSJ Probable aldo-keto reductase 2 OS=Oryza sativa subsp. japonica GN=Os04g0338000 PE=2 SV=2
mtr-miR156h-3p_1ss8AC	comp68025_c0	comp68025_c0	sp|Q38890|GUN25_ARATH Endoglucanase 25 OS=Arabidopsis thaliana GN=KOR PE=1 SV=1	GO:0009504(cell plate);GO:0005769(early endosome);GO:0005794(Golgi apparatus);GO:0016021(integral to membrane);GO:0005886(plasma membrane);GO:0008810(cellulase activity);GO:0007047(cellular cell wall organization);GO:0030244(cellulose biosynthetic process);GO:0030245(cellulose catabolic process);GO:0043622(cortical microtubule organization);GO:0042538(hyperosmotic salinity response);GO:0009735(re…	ko00500(Starch and sucrose metabolism)
mtr-miR156h-3p_1ss8AC	comp60218_c0	comp60218_c0	sp|Q0WP01|PTR9_ARATH Probable peptide/nitrate transporter At1g22540 OS=Arabidopsis thaliana GN=At1g22540 PE=2 SV=1	GO:0016021(integral to membrane);GO:0005215(transporter activity);GO:0006857(oligopeptide transport)
mtr-miR156h-3p_1ss8AC	comp63538_c0	comp63538_c0	-
mtr-miR156h-3p_1ss8AC	comp34561_c0	comp34561_c0	-
mtr-miR156h-3p_1ss8AC	comp49053_c0	comp49053_c0	-
mtr-miR156h-3p_1ss8AC	comp52258_c0	comp52258_c0	sp|Q9XII1|PDV2_ARATH Plastid division protein PDV2 OS=Arabidopsis thaliana GN=PDV2 PE=1 SV=1	GO:0031359(integral to chloroplast outer membrane);GO:0005515(protein binding);GO:0043572(plastid fission)
mtr-miR156h-3p_1ss8AC	comp294733_c0	comp294733_c0	-
mtr-miR156h-3p_1ss8AC	comp56517_c0	comp56517_c0	-
mtr-miR156h-3p_1ss8AC	comp68539_c0	comp68539_c0	sp|P46837|YHGF_ECOLI Protein YhgF OS=Escherichia coli (strain K12) GN=yhgF PE=1 SV=3	GO:0016788(hydrolase activity, acting on ester bonds);GO:0003723(RNA binding);GO:0006139(nucleobase, nucleoside, nucleotide and nucleic acid metabolic process)	ko00230(Purine metabolism);ko00250(Alanine,ko aspartate and glutamate metabolism)
mtr-miR156h-3p_1ss8AC	comp68555_c0	comp68555_c0	sp|P77783|YNFF_ECOLI Probable dimethyl sulfoxide reductase chain YnfF OS=Escherichia coli (strain K12) GN=ynfF PE=1 SV=4	GO:0005886(plasma membrane);GO:0051539(4 iron, 4 sulfur cluster binding);GO:0009389(dimethyl sulfoxide reductase activity);GO:0009055(electron carrier activity);GO:0030151(molybdenum ion binding);GO:0016661(oxidoreductase activity, acting on other nitrogenous compounds as donors);GO:0033797(selenate reductase activity);GO:0045333(cellular respiration)	ko00620(Pyruvate metabolism);ko00640(Propanoate metabolism);ko00650(Butanoate metabolism)
mtr-miR156h-3p_1ss8AC	comp66550_c0	comp66550_c0	sp|P48147|PPCE_HUMAN Prolyl endopeptidase OS=Homo sapiens GN=PREP PE=1 SV=2	GO:0004252(serine-type endopeptidase activity);GO:0070008(serine-type exopeptidase activity);GO:0006508(proteolysis)
mtr-miR156h-3p_1ss8AC	comp57748_c0	comp57748_c0	-
mtr-miR156h-3p_1ss8AC	comp58562_c0	comp58562_c0	sp|P75785|YBIP_ECOLI Putative phosphoethanolamine transferase YbiP OS=Escherichia coli (strain K12) GN=ybiP PE=1 SV=1	GO:0016021(integral to membrane);GO:0005886(plasma membrane);GO:0008484(sulfuric ester hydrolase activity);GO:0016740(transferase activity)
mtr-miR156h-3p_1ss8AC	comp43327_c0	comp43327_c0	-
mtr-miR156h-3p_1ss8AC	comp56427_c0	comp56427_c0	-
mtr-miR156h-3p_1ss8AC	comp60325_c0	comp60325_c0	-
mtr-miR156h-3p_1ss8AC	comp68070_c0	comp68070_c0	sp|Q5RC80|RBM39_PONAB RNA-binding protein 39 OS=Pongo abelii GN=RBM39 PE=2 SV=1	GO:0016607(nuclear speck);GO:0000166(nucleotide binding);GO:0003723(RNA binding);GO:0006397(mRNA processing);GO:0006355(regulation of transcription, DNA-dependent);GO:0008380(RNA splicing);GO:0006351(transcription, DNA-dependent)	ko03022(Basal transcription factors)
mtr-miR156h-3p_1ss8AC	comp63179_c0	comp63179_c0	sp|Q9ZUD9|SRO2_ARATH Probable inactive poly [ADP-ribose] polymerase SRO2 OS=Arabidopsis thaliana GN=SRO2 PE=1 SV=1	GO:0005634(nucleus);GO:0003950(NAD+ ADP-ribosyltransferase activity);GO:0007275(multicellular organismal development);GO:0006950(response to stress)
mtr-miR156h-3p_1ss8AC	comp64491_c0	comp64491_c0	sp|Q5Z9Z0|BGL24_ORYSJ Beta-glucosidase 24 OS=Oryza sativa subsp. japonica GN=BGLU24 PE=2 SV=1	GO:0008422(beta-glucosidase activity);GO:0043169(cation binding);GO:0005975(carbohydrate metabolic process)	ko00460(Cyanoamino acid metabolism);ko00500(Starch and sucrose metabolism);ko00940(Phenylpropanoid biosynthesis)
mtr-miR156h-3p_1ss8AC	comp60871_c0	comp60871_c0	sp|Q84JC0|RRP8_ARATH Ribosomal RNA-processing protein 8 OS=Arabidopsis thaliana GN=At5g40530 PE=2 SV=1	GO:0005677(chromatin silencing complex);GO:0005730(nucleolus);GO:0033553(rDNA heterochromatin);GO:0035064(methylated histone residue binding);GO:0008168(methyltransferase activity);GO:0016568(chromatin modification);GO:0000183(chromatin silencing at rDNA);GO:0006364(rRNA processing);GO:0006351(transcription, DNA-dependent)
mtr-miR156h-3p_1ss8AC	comp65957_c0	comp65957_c0	sp|Q9C758|TCP24_ARATH Transcription factor TCP24 OS=Arabidopsis thaliana GN=TCP24 PE=1 SV=1	GO:0005634(nucleus);GO:0003677(DNA binding);GO:0005515(protein binding);GO:0048366(leaf development);GO:0008285(negative regulation of cell proliferation);GO:0006355(regulation of transcription, DNA-dependent);GO:0006351(transcription, DNA-dependent)
mtr-miR156h-3p_1ss8AC	comp10366_c0	comp10366_c0	-
mtr-miR156h-3p_1ss8AC	comp525079_c0	comp525079_c0	-
mtr-miR156h-3p_1ss8AC	comp52629_c0	comp52629_c0	-
mtr-miR156h-3p_1ss8AC	comp60831_c0	comp60831_c0	-
mtr-miR156h-3p_1ss8AC	comp31501_c0	comp31501_c0	-
mtr-miR156h-3p_1ss8AC	comp68525_c0	comp68525_c0	sp|P30855|EVGS_ECOLI Sensor protein EvgS OS=Escherichia coli (strain K12) GN=evgS PE=1 SV=2	GO:0016021(integral to membrane);GO:0030288(outer membrane-bounded periplasmic space);GO:0005886(plasma membrane);GO:0005524(ATP binding);GO:0005215(transporter activity);GO:0000156(two-component response regulator activity);GO:0000155(two-component sensor activity);GO:0018106(peptidyl-histidine phosphorylation);GO:0006355(regulation of transcription, DNA-dependent)
mtr-miR156h-3p_1ss8AC	comp49367_c0	comp49367_c0	-
mtr-miR156h-3p_1ss8AC	comp68555_c0	comp68555_c0	sp|P77783|YNFF_ECOLI Probable dimethyl sulfoxide reductase chain YnfF OS=Escherichia coli (strain K12) GN=ynfF PE=1 SV=4	GO:0005886(plasma membrane);GO:0051539(4 iron, 4 sulfur cluster binding);GO:0009389(dimethyl sulfoxide reductase activity);GO:0009055(electron carrier activity);GO:0030151(molybdenum ion binding);GO:0016661(oxidoreductase activity, acting on other nitrogenous compounds as donors);GO:0033797(selenate reductase activity);GO:0045333(cellular respiration)	ko00620(Pyruvate metabolism);ko00640(Propanoate metabolism);ko00650(Butanoate metabolism)
mtr-miR156h-3p_1ss8AC	comp68529_c0	comp68529_c0	sp|P43329|HRPA_ECOLI ATP-dependent RNA helicase HrpA OS=Escherichia coli (strain K12) GN=hrpA PE=3 SV=3	GO:0005524(ATP binding);GO:0008026(ATP-dependent helicase activity);GO:0003676(nucleic acid binding);GO:0006397(mRNA processing)	ko00010(Glycolysis / Gluconeogenesis);ko00030(Pentose phosphate pathway);ko00051(Fructose and mannose metabolism);ko00710(Carbon fixation in photosynthetic organisms)
mtr-miR156h-3p_1ss8AC	comp211806_c0	comp211806_c0	-		ko04010(MAPK signaling pathway);ko04012(ErbB signaling pathway);ko04062(Chemokine signaling pathway);ko04114(Oocyte meiosis);ko04150(mTOR signaling pathway);ko04270(Vascular smooth muscle contraction);ko04320(Dorso-ventral axis formation);ko04350(TGF-beta signaling pathway);ko04360(Axon guidance);ko04370(VEGF signaling pathway);ko04510(Focal adhesion);ko04520(Adherens junction);ko04540(Gap juncti…
mtr-miR156h-3p_1ss8AC	comp66801_c0	comp66801_c0	sp|P76578|YFHM_ECOLI Uncharacterized lipoprotein YfhM OS=Escherichia coli (strain K12) GN=yfhM PE=4 SV=1	GO:0005886(plasma membrane);GO:0004866(endopeptidase inhibitor activity)	ko00230(Purine metabolism);ko00983(Drug metabolism - other enzymes)
mtr-miR156h-3p_1ss8AC	comp18271_c0	comp18271_c0	-
mtr-miR156h-3p_1ss8AC	comp64341_c1	comp64341_c1	-
mtr-miR156h-3p_1ss8AC	comp1208002_c0	comp1208002_c0	-
mtr-miR156h-3p_1ss8AC	comp145163_c0	comp145163_c0	sp|Q9FFI2|ATG5_ARATH Autophagy protein 5 OS=Arabidopsis thaliana GN=ATG5 PE=2 SV=1	GO:0005737(cytoplasm);GO:0006914(autophagy);GO:0050832(defense response to fungus);GO:0010150(leaf senescence);GO:0015031(protein transport);GO:0042594(response to starvation)	ko04140(Regulation of autophagy);ko04622(RIG-I-like receptor signaling pathway)
mtr-miR156h-3p_1ss8AC	comp22998_c0	comp22998_c0	-
mtr-miR156h-3p_1ss8AC	comp654632_c0	comp654632_c0	-
mtr-miR156h-3p_1ss8AC	comp14571_c0	comp14571_c0	-
mtr-miR156h-3p_1ss8AC	comp62105_c0	comp62105_c0	-
mtr-miR156h-3p_1ss8AC	comp37383_c0	comp37383_c0	-
mtr-miR156h-3p_1ss8AC	comp30069_c0	comp30069_c0	-
mtr-miR156h-3p_1ss8AC	comp68428_c0	comp68428_c0	sp|P30015|LHR_ECOLI Probable ATP-dependent helicase lhr OS=Escherichia coli (strain K12) GN=lhr PE=3 SV=2	GO:0005524(ATP binding);GO:0008026(ATP-dependent helicase activity);GO:0003676(nucleic acid binding)	ko00970(Aminoacyl-tRNA biosynthesis)
mtr-miR156h-3p_1ss8AC	comp180059_c0	comp180059_c0	-
mtr-miR156h-3p_1ss8AC	comp241942_c0	comp241942_c0	-
mtr-miR156h-3p_1ss8AC	comp61201_c0	comp61201_c0	-
mtr-miR156h-3p_1ss8AC	comp38438_c0	comp38438_c0	-
mtr-miR156h-3p_1ss8AC	comp68276_c0	comp68276_c0	sp|P0A9Q8|ADHE_ECO57 Aldehyde-alcohol dehydrogenase OS=Escherichia coli O157:H7 GN=adhE PE=3 SV=2	GO:0008774(acetaldehyde dehydrogenase );GO:0004022(alcohol dehydrogenase );GO:0046872(metal ion binding);GO:0006066(alcohol metabolic process);GO:0015976(carbon utilization)
mtr-miR156h-3p_1ss8AC	comp25878_c0	comp25878_c0	-
mtr-miR156h-3p_1ss8AC	comp422_c0	comp422_c0	sp|Q8RXE8|BASS3_ARATH Probable sodium/metabolite cotransporter BASS3, chloroplastic OS=Arabidopsis thaliana GN=BASS3 PE=2 SV=1
mtr-miR156h-3p_1ss8AC	comp44387_c0	comp44387_c0	sp|F4JQ95|DGK7_ARATH Diacylglycerol kinase 7 OS=Arabidopsis thaliana GN=DGK7 PE=1 SV=1
mtr-miR156h-3p_1ss8AC	comp256118_c0	comp256118_c0	-
mtr-miR156h-3p_1ss8AC	comp623011_c0	comp623011_c0	-
mtr-miR156h-3p_1ss8AC	comp56721_c0	comp56721_c0	-
mtr-miR156h-3p_1ss8AC	comp67843_c0	comp67843_c0	sp|P75750|YBGQ_ECOLI Uncharacterized outer membrane usher protein YbgQ OS=Escherichia coli (strain K12) GN=ybgQ PE=3 SV=2	GO:0009279(cell outer membrane);GO:0016021(integral to membrane);GO:0005886(plasma membrane);GO:0005215(transporter activity)	ko00020(Citrate cycle );ko00190(Oxidative phosphorylation)
mtr-miR156h-3p_1ss8AC	comp5517_c0	comp5517_c0	-
mtr-miR156h-3p_1ss8AC	comp35333_c0	comp35333_c0	-
mtr-miR156h-3p_1ss8AC	comp43792_c0	comp43792_c0	-
mtr-miR156h-3p_1ss8AC	comp51356_c0	comp51356_c0	sp|P17069|ACEA_GOSHI Isocitrate lyase OS=Gossypium hirsutum PE=2 SV=1	GO:0009514(glyoxysome);GO:0004451(isocitrate lyase activity);GO:0006097(glyoxylate cycle);GO:0006099(tricarboxylic acid cycle)	ko00630(Glyoxylate and dicarboxylate metabolism)
mtr-miR156h-3p_1ss8AC	comp483822_c0	comp483822_c0	-
mtr-miR156h-3p_1ss8AC	comp61753_c0	comp61753_c0	sp|Q8VYP0|SCO11_ARATH Protein SCO1 homolog 1, mitochondrial OS=Arabidopsis thaliana GN=HCC1 PE=2 SV=1	GO:0016021(integral to membrane);GO:0005743(mitochondrial inner membrane);GO:0005507(copper ion binding);GO:0006878(cellular copper ion homeostasis);GO:0006825(copper ion transport);GO:0009790(embryo development);GO:0033617(mitochondrial respiratory chain complex IV assembly)
mtr-miR156h-3p_1ss8AC	comp59638_c0	comp59638_c0	sp|Q9C660|PEK10_ARATH Proline-rich receptor-like protein kinase PERK10 OS=Arabidopsis thaliana GN=PERK10 PE=1 SV=2	GO:0016021(integral to membrane);GO:0005886(plasma membrane);GO:0005524(ATP binding);GO:0004674(protein serine/threonine kinase activity)
mtr-miR156h-3p_1ss8AC	comp49456_c0	comp49456_c0	-
mtr-miR156h-3p_1ss8AC	comp1043867_c0	comp1043867_c0	-
mtr-miR156h-3p_1ss8AC	comp47320_c0	comp47320_c0	-
mtr-miR156h-3p_1ss8AC	comp55074_c0	comp55074_c0	-
mtr-miR156h-3p_1ss8AC	comp56053_c0	comp56053_c0	-
mtr-miR156h-3p_1ss8AC	comp12122_c0	comp12122_c0	-
mtr-miR156h-3p_1ss8AC	comp44987_c0	comp44987_c0	sp|Q9M2V7|AB16G_ARATH ABC transporter G family member 16 OS=Arabidopsis thaliana GN=ABCG16 PE=2 SV=2	GO:0016021(integral to membrane);GO:0005524(ATP binding);GO:0016887(ATPase activity);GO:0006810(transport)
mtr-miR156h-3p_1ss8AC	comp55721_c0	comp55721_c0	-
mtr-miR156h-3p_1ss8AC	comp65832_c0	comp65832_c0	sp|O60870|KIN17_HUMAN DNA/RNA-binding protein KIN17 OS=Homo sapiens GN=KIN PE=1 SV=2	GO:0005737(cytoplasm);GO:0016363(nuclear matrix);GO:0003690(double-stranded DNA binding);GO:0003723(RNA binding);GO:0008270(zinc ion binding);GO:0006310(DNA recombination);GO:0006281(DNA repair);GO:0006260(DNA replication);GO:0044419(interspecies interaction between organisms);GO:0006397(mRNA processing)
mtr-miR156h-3p_1ss8AC	comp17171_c0	comp17171_c0	-
mtr-miR156h-3p_1ss8AC	comp493330_c0	comp493330_c0	-
mtr-miR156h-3p_1ss8AC	comp50519_c0	comp50519_c0	-
mtr-miR156h-3p_1ss8AC	comp58879_c0	comp58879_c0	-
mtr-miR156h-3p_1ss8AC	comp61968_c0	comp61968_c0	sp|Q9ZQ94|U73C5_ARATH UDP-glycosyltransferase 73C5 OS=Arabidopsis thaliana GN=UGT73C5 PE=2 SV=1	GO:0016021(integral to membrane);GO:0050502(cis-zeatin O-beta-D-glucosyltransferase activity);GO:0080046(quercetin 4'-O-glucosyltransferase activity);GO:0080044(quercetin 7-O-glucosyltransferase activity);GO:0050403(trans-zeatin O-beta-D-glucosyltransferase activity);GO:0016131(brassinosteroid metabolic process)	ko00942(Anthocyanin biosynthesis)
mtr-miR156h-3p_1ss8AC	comp489692_c0	comp489692_c0	sp|P24242|ASCG_ECOLI HTH-type transcriptional regulator AscG OS=Escherichia coli (strain K12) GN=ascG PE=1 SV=4	GO:0005622(intracellular);GO:0043565(sequence-specific DNA binding);GO:0003700(sequence-specific DNA binding transcription factor activity)
mtr-miR156h-3p_1ss8AC	comp65880_c0	comp65880_c0	-
mtr-miR156h-3p_1ss8AC	comp503206_c0	comp503206_c0	-
mtr-miR156h-3p_1ss8AC	comp63289_c0	comp63289_c0	sp|Q9CX48|ZCH10_MOUSE Zinc finger CCHC domain-containing protein 10 OS=Mus musculus GN=Zcchc10 PE=2 SV=1	GO:0003676(nucleic acid binding);GO:0008270(zinc ion binding)
mtr-miR156h-3p_1ss8AC	comp44255_c0	comp44255_c0	sp|Q9SAJ3|FTSHC_ARATH ATP-dependent zinc metalloprotease FTSH 12, chloroplastic OS=Arabidopsis thaliana GN=FTSH12 PE=2 SV=2	GO:0009535(chloroplast thylakoid membrane);GO:0016021(integral to membrane);GO:0005739(mitochondrion);GO:0005524(ATP binding);GO:0046872(metal ion binding);GO:0004222(metalloendopeptidase activity);GO:0017111(nucleoside-triphosphatase activity);GO:0006508(proteolysis)
mtr-miR156h-3p_1ss8AC	comp343378_c0	comp343378_c0	-
mtr-miR156h-3p_1ss8AC	comp25147_c0	comp25147_c0	sp|A4ZGQ8|HMT1_BRAOT Homocysteine S-methyltransferase 1 OS=Brassica oleracea var. italica GN=HMT1 PE=1 SV=1	GO:0008898(homocysteine S-methyltransferase activity);GO:0046872(metal ion binding)	ko00270(Cysteine and methionine metabolism)
mtr-miR156h-3p_1ss8AC	comp12375_c0	comp12375_c0	-
mtr-miR156h-3p_1ss8AC	comp495954_c0	comp495954_c0	-
mtr-miR156h-3p_1ss8AC	comp44260_c0	comp44260_c0	-
mtr-miR156h-3p_1ss8AC	comp50870_c0	comp50870_c0	-
mtr-miR156h-3p_1ss8AC	comp85395_c0	comp85395_c0	-
mtr-miR156h-3p_1ss8AC	comp128340_c0	comp128340_c0	-
mtr-miR156h-3p_1ss8AC	comp9654_c0	comp9654_c0	-
mtr-miR156h-3p_1ss8AC	comp701_c0	comp701_c0	-
mtr-miR156h-3p_1ss8AC	comp13052_c0	comp13052_c0	-
mtr-miR156h-3p_1ss8AC	comp57285_c0	comp57285_c0	sp|Q9LUR2|PP238_ARATH Putative pentatricopeptide repeat-containing protein At3g16710, mitochondrial OS=Arabidopsis thaliana GN=At3g16710 PE=3 SV=1	GO:0005739(mitochondrion);GO:0005488(binding)
mtr-miR156h-3p_1ss8AC	comp49500_c0	comp49500_c0	-
mtr-miR156h-3p_1ss8AC	comp47345_c0	comp47345_c0	-
mtr-miR156h-3p_1ss8AC	comp58921_c0	comp58921_c0	-
mtr-miR156h-3p_1ss8AC	comp12457_c0	comp12457_c0	-
mtr-miR156h-3p_1ss8AC	comp57838_c0	comp57838_c0	sp|Q9MAH1|TTL1_ARATH TPR repeat-containing thioredoxin TTL1 OS=Arabidopsis thaliana GN=TTL1 PE=1 SV=1	GO:0005488(binding);GO:0009738(abscisic acid mediated signaling pathway);GO:0045454(cell redox homeostasis);GO:0009789(positive regulation of abscisic acid mediated signaling pathway);GO:0009651(response to salt stress)
mtr-miR156h-3p_1ss8AC	comp43141_c0	comp43141_c0	-
mtr-miR156h-3p_1ss8AC	comp245642_c0	comp245642_c0	-
mtr-miR156h-3p_1ss8AC	comp41468_c0	comp41468_c0	-
mtr-miR156h-3p_1ss8AC	comp553911_c0	comp553911_c0	-
mtr-miR156h-3p_1ss8AC	comp56372_c0	comp56372_c0	-
mtr-miR156h-3p_1ss8AC	comp53648_c0	comp53648_c0	-
mtr-miR156h-3p_1ss8AC	comp488680_c0	comp488680_c0	-
mtr-miR156h-3p_1ss8AC	comp227733_c0	comp227733_c0	-
mtr-miR156h-3p_1ss8AC	comp41156_c0	comp41156_c0	sp|O22799|Y2349_ARATH Uncharacterized protein At2g33490 OS=Arabidopsis thaliana GN=At2g33490 PE=1 SV=2	GO:0005886(plasma membrane)
mtr-miR156h-3p_1ss8AC	comp181574_c0	comp181574_c0	-
mtr-miR156h-3p_1ss8AC	comp429769_c0	comp429769_c0	-
mtr-miR156h-3p_1ss8AC	comp417126_c0	comp417126_c0	-
mtr-miR156h-3p_1ss8AC	comp58962_c0	comp58962_c0	-
mtr-miR156h-3p_1ss8AC	comp58356_c0	comp58356_c0	sp|P32670|PTFX2_ECOLI Multiphosphoryl transfer protein 2 OS=Escherichia coli (strain K12) GN=ptsA PE=3 SV=2	GO:0005737(cytoplasm);GO:0016301(kinase activity);GO:0046872(metal ion binding);GO:0008965(phosphoenolpyruvate-protein phosphotransferase activity);GO:0005351(sugar:hydrogen symporter activity);GO:0009401(phosphoenolpyruvate-dependent sugar phosphotransferase system)	ko00620(Pyruvate metabolism);ko00720(Reductive carboxylate cycle )
mtr-miR156h-3p_1ss8AC	comp58976_c0	comp58976_c0	sp|P42654|1433B_VICFA 14-3-3-like protein B OS=Vicia faba PE=2 SV=1	GO:0019904(protein domain specific binding)	ko04110(Cell cycle);ko04114(Oocyte meiosis);ko04722(Neurotrophin signaling pathway)
mtr-miR156h-3p_1ss8AC	comp55842_c0	comp55842_c0	sp|Q9FGZ9|UBL5_ARATH Ubiquitin-like protein 5 OS=Arabidopsis thaliana GN=UBL5 PE=1 SV=1	GO:0005737(cytoplasm)
mtr-miR156h-3p_1ss8AC	comp53546_c0	comp53546_c0	-
mtr-miR156h-3p_1ss8AC	comp3590_c0	comp3590_c0	-
mtr-miR156h-3p_1ss8AC	comp68296_c1	comp68296_c1	sp|P76585|YPHG_ECOLI Uncharacterized protein YphG OS=Escherichia coli (strain K12) GN=yphG PE=4 SV=2	GO:0005488(binding)	ko02010(ABC transporters)
mtr-miR156h-3p_1ss8AC	comp778360_c0	comp778360_c0	-
mtr-miR156h-3p_1ss8AC	comp41628_c0	comp41628_c0	-
mtr-miR156h-3p_1ss8AC	comp29656_c0	comp29656_c0	-
mtr-miR156h-3p_1ss8AC	comp53882_c0	comp53882_c0	sp|Q9SU08|AUXI1_ARATH Auxilin-related protein 1 OS=Arabidopsis thaliana GN=At4g12780 PE=1 SV=2	GO:0005829(cytosol);GO:0005886(plasma membrane);GO:0031072(heat shock protein binding)
mtr-miR156h-3p_1ss8AC	comp58289_c0	comp58289_c0	sp|Q949V6|ARI1_ARATH Probable E3 ubiquitin-protein ligase ARI1 OS=Arabidopsis thaliana GN=ARI1 PE=2 SV=1	GO:0016874(ligase activity);GO:0008270(zinc ion binding)
mtr-miR156h-3p_1ss8AC	comp43502_c0	comp43502_c0	-
mtr-miR156h-3p_1ss8AC	comp62592_c0	comp62592_c0	sp|Q9M531|H2A_EUPES Histone H2A OS=Euphorbia esula PE=2 SV=1	GO:0000786(nucleosome);GO:0005634(nucleus);GO:0003677(DNA binding);GO:0006334(nucleosome assembly)
mtr-miR156h-3p_1ss8AC	comp16838_c0	comp16838_c0	-
mtr-miR156h-3p_1ss8AC	comp594906_c0	comp594906_c0	sp|Q9FMU2|PP380_ARATH Pentatricopeptide repeat-containing protein At5g14080 OS=Arabidopsis thaliana GN=At5g14080 PE=2 SV=2	GO:0009507(chloroplast);GO:0005488(binding)
mtr-miR156h-3p_1ss8AC	comp49512_c0	comp49512_c0	-
mtr-miR156h-3p_1ss8AC	comp53924_c0	comp53924_c0	-
mtr-miR156h-3p_1ss8AC	comp46981_c0	comp46981_c0	sp|Q9FH54|EF114_ARATH Ethylene-responsive transcription factor ERF114 OS=Arabidopsis thaliana GN=ERF114 PE=2 SV=1	GO:0005634(nucleus);GO:0003677(DNA binding);GO:0003700(sequence-specific DNA binding transcription factor activity);GO:0050832(defense response to fungus);GO:0009873(ethylene mediated signaling pathway)
mtr-miR156h-3p_1ss8AC	comp50626_c0	comp50626_c0	sp|P42777|GBF4_ARATH G-box-binding factor 4 OS=Arabidopsis thaliana GN=GBF4 PE=1 SV=1	GO:0005634(nucleus);GO:0046983(protein dimerization activity);GO:0043565(sequence-specific DNA binding);GO:0003700(sequence-specific DNA binding transcription factor activity)	ko00230(Purine metabolism);ko00240(Pyrimidine metabolism);ko03020(RNA polymerase)
mtr-miR156h-3p_1ss8AC	comp41431_c0	comp41431_c0	-
mtr-miR156h-3p_1ss8AC	comp37122_c0	comp37122_c0	-
mtr-miR156h-3p_1ss8AC	comp67385_c0	comp67385_c0	sp|Q9C7N2|CAD1_ARATH MACPF domain-containing protein CAD1 OS=Arabidopsis thaliana GN=CAD1 PE=2 SV=1
mtr-miR156h-3p_1ss8AC	comp67705_c0	comp67705_c0	-		ko00561(Glycerolipid metabolism)
mtr-miR156h-3p_1ss8AC	comp442900_c0	comp442900_c0	-
mtr-miR156h-3p_1ss8AC	comp54593_c0	comp54593_c0	-
mtr-miR156h-3p_1ss8AC	comp30622_c0	comp30622_c0	-
mtr-miR156h-3p_1ss8AC	comp31849_c0	comp31849_c0	sp|Q8L9T7|AHP5_ARATH Histidine-containing phosphotransfer protein 5 OS=Arabidopsis thaliana GN=AHP5 PE=1 SV=2	GO:0005829(cytosol);GO:0005634(nucleus);GO:0009927(histidine phosphotransfer kinase activity);GO:0043424(protein histidine kinase binding);GO:0009736(cytokinin mediated signaling pathway);GO:0080036(regulation of cytokinin mediated signaling pathway);GO:0000160(two-component signal transduction system )
mtr-miR156h-3p_1ss8AC	comp63418_c1	comp63418_c1	sp|O14327|PAB2_SCHPO Polyadenylate-binding protein 2 OS=Schizosaccharomyces pombe (strain 972 / ATCC 24843) GN=pab2 PE=3 SV=1	GO:0005634(nucleus);GO:0000166(nucleotide binding);GO:0008143(poly);GO:0005515(protein binding);GO:0000289(nuclear-transcribed mRNA poly)
mtr-miR156h-3p_1ss8AC	comp60873_c0	comp60873_c0	-
mtr-miR156h-3p_1ss8AC	comp94275_c0	comp94275_c0	-
mtr-miR156h-3p_1ss8AC	comp55162_c0	comp55162_c0	-
mtr-miR156h-3p_1ss8AC	comp18321_c0	comp18321_c0	-
mtr-miR156h-3p_1ss8AC	comp64628_c0	comp64628_c0	sp|P24068|OCS1_MAIZE Ocs element-binding factor 1 OS=Zea mays GN=OBF1 PE=2 SV=2	GO:0005634(nucleus);GO:0046983(protein dimerization activity);GO:0043565(sequence-specific DNA binding);GO:0003700(sequence-specific DNA binding transcription factor activity)	ko04010(MAPK signaling pathway);ko04012(ErbB signaling pathway);ko04062(Chemokine signaling pathway);ko04114(Oocyte meiosis);ko04150(mTOR signaling pathway);ko04270(Vascular smooth muscle contraction);ko04320(Dorso-ventral axis formation);ko04350(TGF-beta signaling pathway);ko04360(Axon guidance);ko04370(VEGF signaling pathway);ko04510(Focal adhesion);ko04520(Adherens junction);ko04540(Gap juncti…
mtr-miR156h-3p_1ss8AC	comp53515_c0	comp53515_c0	-
mtr-miR156h-3p_1ss8AC	comp51201_c0	comp51201_c0	-
mtr-miR156h-3p_1ss8AC	comp333295_c0	comp333295_c0	-
mtr-miR156h-3p_1ss8AC	comp48273_c0	comp48273_c0	-
mtr-miR156h-3p_1ss8AC	comp53618_c0	comp53618_c0	sp|Q40479|ERF2_TOBAC Ethylene-responsive transcription factor 2 OS=Nicotiana tabacum GN=ERF2 PE=2 SV=1	GO:0005634(nucleus);GO:0003677(DNA binding);GO:0003700(sequence-specific DNA binding transcription factor activity);GO:0006952(defense response);GO:0009873(ethylene mediated signaling pathway)
mtr-miR156h-3p_1ss8AC	comp38384_c0	comp38384_c0	sp|Q5R7X2|SR140_PONAB U2 snRNP-associated SURP motif-containing protein OS=Pongo abelii GN=U2SURP PE=2 SV=1	GO:0005634(nucleus);GO:0000166(nucleotide binding);GO:0003723(RNA binding);GO:0006396(RNA processing)
mtr-miR156h-3p_1ss8AC	comp44589_c0	comp44589_c0	-
mtr-miR156h-3p_1ss8AC	comp192562_c0	comp192562_c0	sp|Q55BZ4|PCY2_DICDI Ethanolamine-phosphate cytidylyltransferase OS=Dictyostelium discoideum GN=pctA PE=1 SV=1	GO:0045335(phagocytic vesicle);GO:0004306(ethanolamine-phosphate cytidylyltransferase activity);GO:0006646(phosphatidylethanolamine biosynthetic process)	ko00440(Phosphonate and phosphinate metabolism);ko00564(Glycerophospholipid metabolism)
mtr-miR156h-3p_1ss8AC	comp64453_c0	comp64453_c0	sp|O22864|NLP8_ARATH Protein NLP8 OS=Arabidopsis thaliana GN=NLP8 PE=2 SV=1	GO:0005634(nucleus);GO:0003677(DNA binding);GO:0006355(regulation of transcription, DNA-dependent);GO:0006351(transcription, DNA-dependent)
mtr-miR156h-3p_1ss8AC	comp41880_c0	comp41880_c0	sp|B2RY56|RBM25_MOUSE RNA-binding protein 25 OS=Mus musculus GN=Rbm25 PE=1 SV=2		ko03040(Spliceosome)
mtr-miR156h-3p_1ss8AC	comp300541_c0	comp300541_c0	-
mtr-miR156h-3p_1ss8AC	comp63138_c1	comp63138_c1	-
mtr-miR156h-3p_1ss8AC	comp62687_c0	comp62687_c0	-
mtr-miR156h-3p_1ss8AC	comp48930_c0	comp48930_c0	-
mtr-miR156h-3p_1ss8AC	comp43327_c0	comp43327_c0	-
mtr-miR156h-3p_1ss8AC	comp46290_c0	comp46290_c0	-
mtr-miR156h-3p_1ss8AC	comp34791_c0	comp34791_c0	sp|Q9XFH4|DDM1_ARATH ATP-dependent DNA helicase DDM1 OS=Arabidopsis thaliana GN=DDM1 PE=1 SV=1	GO:0000786(nucleosome);GO:0005634(nucleus);GO:0005524(ATP binding);GO:0004003(ATP-dependent DNA helicase activity);GO:0003677(DNA binding);GO:0005515(protein binding);GO:0009294(DNA mediated transformation);GO:0006344(maintenance of chromatin silencing);GO:0006346(methylation-dependent chromatin silencing);GO:0090241(negative regulation of histone H4 acetylation);GO:0051574(positive regulation of…
mtr-miR156h-3p_1ss8AC	comp40140_c0	comp40140_c0	-
mtr-miR156h-3p_1ss8AC	comp56314_c0	comp56314_c0	-
mtr-miR156h-3p_1ss8AC	comp47199_c0	comp47199_c0	-
mtr-miR156h-3p_1ss8AC	comp60952_c0	comp60952_c0	sp|Q28CY2|EIF3G_XENTR Eukaryotic translation initiation factor 3 subunit G OS=Xenopus tropicalis GN=eif3g PE=2 SV=1	GO:0005852(eukaryotic translation initiation factor 3 complex);GO:0000166(nucleotide binding);GO:0003743(translation initiation factor activity)
mtr-miR156h-3p_1ss8AC	comp10083_c0	comp10083_c0	-
mtr-miR156h-3p_1ss8AC	comp65493_c0	comp65493_c0	sp|Q9T0H9|GDT12_ARATH GDT1-like protein 2, chloroplastic OS=Arabidopsis thaliana GN=At4g13590 PE=1 SV=2	GO:0009706(chloroplast inner membrane);GO:0016021(integral to membrane)
mtr-miR156h-3p_1ss8AC	comp40470_c0	comp40470_c0	-
mtr-miR156h-3p_1ss8AC	comp33429_c0	comp33429_c0	-
mtr-miR156h-3p_1ss8AC	comp25499_c0	comp25499_c0	-
mtr-miR156h-3p_1ss8AC	comp313529_c0	comp313529_c0	sp|Q9LRZ3|PUM24_ARATH Pumilio homolog 24 OS=Arabidopsis thaliana GN=APUM24 PE=2 SV=1	GO:0005730(nucleolus);GO:0003723(RNA binding);GO:0006417(regulation of translation)
mtr-miR156h-3p_1ss8AC	comp60154_c0	comp60154_c0	-
mtr-miR156h-3p_1ss8AC	comp33408_c0	comp33408_c0	-
mtr-miR156h-3p_1ss8AC	comp37785_c0	comp37785_c0	-
mtr-miR156h-3p_1ss8AC	comp25565_c0	comp25565_c0	sp|B9KXV3|FTSH1_THERP ATP-dependent zinc metalloprotease FtsH 1 OS=Thermomicrobium roseum (strain ATCC 27502 / DSM 5159 / P-2) GN=ftsH1 PE=3 SV=1	GO:0016021(integral to membrane);GO:0005886(plasma membrane);GO:0005524(ATP binding);GO:0046872(metal ion binding);GO:0004222(metalloendopeptidase activity);GO:0017111(nucleoside-triphosphatase activity);GO:0030163(protein catabolic process);GO:0006508(proteolysis)
mtr-miR156h-3p_1ss8AC	comp61588_c0	comp61588_c0	-
mtr-miR156h-3p_1ss8AC	comp278087_c0	comp278087_c0	-
mtr-miR156h-3p_1ss8AC	comp128252_c0	comp128252_c0	-
mtr-miR156h-3p_1ss8AC	comp67283_c0	comp67283_c0	sp|Q45QI7|CFI_CAMSI Chalcone--flavonone isomerase OS=Camellia sinensis GN=CHI PE=2 SV=2	GO:0045430(chalcone isomerase activity);GO:0042398(cellular modified amino acid biosynthetic process);GO:0009813(flavonoid biosynthetic process)	ko00941(Flavonoid biosynthesis)
mtr-miR156h-3p_1ss8AC	comp2977_c0	comp2977_c0	sp|Q9ZQ95|U73C6_ARATH UDP-glycosyltransferase 73C6 OS=Arabidopsis thaliana GN=UGT73C6 PE=2 SV=1	GO:0080043(quercetin 3-O-glucosyltransferase activity);GO:0080046(quercetin 4'-O-glucosyltransferase activity);GO:0080044(quercetin 7-O-glucosyltransferase activity);GO:0051555(flavonol biosynthetic process)
mtr-miR156h-3p_1ss8AC	comp260986_c0	comp260986_c0	-
mtr-miR156h-3p_1ss8AC	comp46498_c0	comp46498_c0	-
mtr-miR156h-3p_1ss8AC	comp59929_c0	comp59929_c0	sp|P93788|REMO_SOLTU Remorin OS=Solanum tuberosum PE=1 SV=1	GO:0005886(plasma membrane);GO:0048032(galacturonate binding);GO:0007267(cell-cell signaling);GO:0006810(transport)
mtr-miR156h-3p_1ss8AC	comp65325_c0	comp65325_c0	-
mtr-miR156h-3p_1ss8AC	comp134839_c0	comp134839_c0	-
mtr-miR156h-3p_1ss8AC	comp55660_c0	comp55660_c0	sp|Q9Y5K3|PCY1B_HUMAN Choline-phosphate cytidylyltransferase B OS=Homo sapiens GN=PCYT1B PE=1 SV=1	GO:0005783(endoplasmic reticulum);GO:0004105(choline-phosphate cytidylyltransferase activity)	ko00440(Phosphonate and phosphinate metabolism);ko00564(Glycerophospholipid metabolism)
mtr-miR156h-3p_1ss8AC	comp51205_c0	comp51205_c0	-
mtr-miR156h-3p_1ss8AC	comp61379_c0	comp61379_c0	-
mtr-miR156h-3p_1ss8AC	comp24379_c0	comp24379_c0	-
mtr-miR156h-3p_1ss8AC	comp24786_c0	comp24786_c0	-
mtr-miR156h-3p_1ss8AC	comp62787_c0	comp62787_c0	-
mtr-miR156h-3p_1ss8AC	comp52176_c0	comp52176_c0	-
mtr-miR156h-3p_1ss8AC	comp43147_c0	comp43147_c0	-
mtr-miR156h-3p_1ss8AC	comp300689_c0	comp300689_c0	-
mtr-miR156h-3p_1ss8AC	comp30310_c0	comp30310_c0	-
mtr-miR156h-3p_1ss8AC	comp63509_c0	comp63509_c0	sp|P08331|CPDB_ECOLI 2',3'-cyclic-nucleotide 2'-phosphodiesterase/3'-nucleotidase OS=Escherichia coli (strain K12) GN=cpdB PE=1 SV=2	GO:0042597(periplasmic space);GO:0008663(2',3'-cyclic-nucleotide 2'-phosphodiesterase activity);GO:0008254(3'-nucleotidase activity);GO:0046872(metal ion binding);GO:0000166(nucleotide binding);GO:0009166(nucleotide catabolic process)
mtr-miR156h-3p_1ss8AC	comp23148_c0	comp23148_c0	sp|Q9FFR7|FBL87_ARATH Putative F-box/LRR-repeat protein At5g41630 OS=Arabidopsis thaliana GN=At5g41630 PE=4 SV=1
mtr-miR156h-3p_1ss8AC	comp57587_c0	comp57587_c0	-
mtr-miR156h-3p_1ss8AC	comp28238_c0	comp28238_c0	-
mtr-miR156h-3p_1ss8AC	comp59657_c0	comp59657_c0	-
mtr-miR156h-3p_1ss8AC	comp15893_c0	comp15893_c0	-
mtr-miR156h-3p_1ss8AC	comp62236_c0	comp62236_c0	-
mtr-miR156h-3p_1ss8AC	comp501085_c0	comp501085_c0	-
mtr-miR156h-3p_1ss8AC	comp65795_c1	comp65795_c1	-
mtr-miR156h-3p_1ss8AC	comp24934_c0	comp24934_c0	-
mtr-miR156h-3p_1ss8AC	comp44025_c0	comp44025_c0	-
mtr-miR156h-3p_1ss8AC	comp42607_c0	comp42607_c0	sp|Q9LN01|PPR21_ARATH Pentatricopeptide repeat-containing protein At1g08070 OS=Arabidopsis thaliana GN=PCMP-H12 PE=2 SV=1	GO:0005488(binding);GO:0031425(chloroplast RNA processing)
mtr-miR156h-3p_1ss8AC	comp10481_c0	comp10481_c0	sp|Q7XA39|RGA4_SOLBU Putative disease resistance protein RGA4 OS=Solanum bulbocastanum GN=RGA4 PE=2 SV=1	GO:0005524(ATP binding);GO:0006915(apoptosis);GO:0006952(defense response)
mtr-miR156h-3p_1ss8AC	comp52178_c0	comp52178_c0	sp|P18616|RPB1_ARATH DNA-directed RNA polymerase II subunit RPB1 OS=Arabidopsis thaliana GN=RPB205 PE=1 SV=3	GO:0009507(chloroplast);GO:0005665(DNA-directed RNA polymerase II, core complex);GO:0009506(plasmodesma);GO:0005773(vacuole);GO:0003677(DNA binding);GO:0003899(DNA-directed RNA polymerase activity);GO:0046872(metal ion binding);GO:0005515(protein binding);GO:0006366(transcription from RNA polymerase II promoter)	ko00230(Purine metabolism);ko00240(Pyrimidine metabolism);ko03020(RNA polymerase)
mtr-miR156h-3p_1ss8AC	comp37363_c0	comp37363_c0	-
mtr-miR156h-3p_1ss8AC	comp14441_c0	comp14441_c0	-
mtr-miR156h-3p_1ss8AC	comp67811_c0	comp67811_c0	sp|Q9S9N9|CCR1_ARATH Cinnamoyl-CoA reductase 1 OS=Arabidopsis thaliana GN=CCR1 PE=1 SV=1		ko00940(Phenylpropanoid biosynthesis)
mtr-miR156h-3p_1ss8AC	comp55270_c0	comp55270_c0	sp|Q9FDW1|MYB44_ARATH Transcription factor MYB44 OS=Arabidopsis thaliana GN=MYB44 PE=2 SV=1	GO:0005634(nucleus);GO:0003677(DNA binding);GO:0009738(abscisic acid mediated signaling pathway);GO:0006355(regulation of transcription, DNA-dependent);GO:0009733(response to auxin stimulus);GO:0046686(response to cadmium ion);GO:0010200(response to chitin);GO:0009723(response to ethylene stimulus);GO:0009739(response to gibberellin stimulus);GO:0009753(response to jasmonic acid stimulus);GO:0009…
mtr-miR156h-3p_1ss8AC	comp63757_c0	comp63757_c0	sp|P36428|SYA_ARATH Alanine--tRNA ligase OS=Arabidopsis thaliana GN=ALATS PE=1 SV=3	GO:0009507(chloroplast);GO:0005829(cytosol);GO:0005739(mitochondrion);GO:0004813(alanine-tRNA ligase activity);GO:0005524(ATP binding);GO:0046872(metal ion binding);GO:0000049(tRNA binding);GO:0006419(alanyl-tRNA aminoacylation);GO:0046686(response to cadmium ion)	ko00970(Aminoacyl-tRNA biosynthesis)
mtr-miR156h-3p_1ss8AC	comp67896_c0	comp67896_c0	sp|Q9M1Y3|SKI35_ARATH F-box/ankyrin repeat protein SKIP35 OS=Arabidopsis thaliana GN=SKIP35 PE=1 SV=1
mtr-miR156h-3p_1ss8AC	comp29144_c0	comp29144_c0	-
mtr-miR156h-3p_1ss8AC	comp63179_c0	comp63179_c0	sp|Q9ZUD9|SRO2_ARATH Probable inactive poly [ADP-ribose] polymerase SRO2 OS=Arabidopsis thaliana GN=SRO2 PE=1 SV=1	GO:0005634(nucleus);GO:0003950(NAD+ ADP-ribosyltransferase activity);GO:0007275(multicellular organismal development);GO:0006950(response to stress)
mtr-miR156h-3p_1ss8AC	comp55079_c0	comp55079_c0	-
mtr-miR156h-3p_1ss8AC	comp62500_c0	comp62500_c0	sp|Q7LBC6|KDM3B_HUMAN Lysine-specific demethylase 3B OS=Homo sapiens GN=KDM3B PE=1 SV=2	GO:0005634(nucleus);GO:0046872(metal ion binding);GO:0016702(oxidoreductase activity, acting on single donors with incorporation of molecular oxygen, incorporation of two atoms of oxygen);GO:0016568(chromatin modification);GO:0006355(regulation of transcription, DNA-dependent);GO:0006351(transcription, DNA-dependent)
mtr-miR156h-3p_1ss8AC	comp47613_c0	comp47613_c0	sp|Q8LPG9|IQD14_ARATH Protein IQ-DOMAIN 14 OS=Arabidopsis thaliana GN=IQD14 PE=1 SV=1	GO:0005886(plasma membrane)
mtr-miR156h-3p_1ss8AC	comp60000_c1	comp60000_c1	-
mtr-miR156h-3p_1ss8AC	comp44279_c0	comp44279_c0	-
mtr-miR156h-3p_1ss8AC	comp58728_c0	comp58728_c0	-
mtr-miR156h-3p_1ss8AC	comp15179_c0	comp15179_c0	-
mtr-miR156h-3p_1ss8AC	comp64575_c0	comp64575_c0	-
mtr-miR156h-3p_1ss8AC	comp61926_c0	comp61926_c0	sp|Q6ENB7|YCF68_ORYNI Uncharacterized protein ycf68 OS=Oryza nivara GN=ycf68-1 PE=3 SV=1	GO:0009507(chloroplast)
mtr-miR156h-3p_1ss8AC	comp56930_c0	comp56930_c0	-
mtr-miR156h-3p_1ss8AC	comp40750_c1	comp40750_c1	-
mtr-miR156h-3p_1ss8AC	comp39622_c0	comp39622_c0	-
mtr-miR156h-3p_1ss8AC	comp50688_c0	comp50688_c0	-
mtr-miR156h-3p_1ss8AC	comp45858_c0	comp45858_c0	-
mtr-miR156h-3p_1ss8AC	comp50779_c0	comp50779_c0	sp|Q01JD1|SPL7_ORYSI Squamosa promoter-binding-like protein 7 OS=Oryza sativa subsp. indica GN=SPL7 PE=2 SV=1	GO:0005634(nucleus);GO:0003677(DNA binding);GO:0046872(metal ion binding);GO:0006355(regulation of transcription, DNA-dependent);GO:0006351(transcription, DNA-dependent)
mtr-miR156h-3p_1ss8AC	comp68500_c0	comp68500_c0	sp|Q9SSV4|INO1_NICPA Inositol-3-phosphate synthase OS=Nicotiana paniculata GN=INPS1 PE=2 SV=1	GO:0005737(cytoplasm);GO:0005488(binding);GO:0004512(inositol-3-phosphate synthase activity);GO:0006021(inositol biosynthetic process);GO:0008654(phospholipid biosynthetic process)	ko00521(Streptomycin biosynthesis);ko00562(Inositol phosphate metabolism)
mtr-miR156h-3p_1ss8AC	comp60325_c0	comp60325_c0	-
mtr-miR156h-3p_1ss8AC	comp52310_c0	comp52310_c0	-
mtr-miR156h-3p_1ss8AC	comp54630_c0	comp54630_c0	-
mtr-miR156h-3p_1ss8AC	comp43132_c0	comp43132_c0	-
mtr-miR156h-3p_1ss8AC	comp67988_c0	comp67988_c0	sp|Q9FJD5|LAC17_ARATH Laccase-17 OS=Arabidopsis thaliana GN=LAC17 PE=2 SV=1	GO:0048046(apoplast);GO:0005507(copper ion binding);GO:0052716(hydroquinone:oxygen oxidoreductase activity);GO:0008471(laccase activity);GO:0009809(lignin biosynthetic process);GO:0046274(lignin catabolic process)
mtr-miR156h-3p_1ss8AC	comp67624_c0	comp67624_c0	sp|Q93VG8|PPDEX_ARATH DeSI-like protein At4g17486 OS=Arabidopsis thaliana GN=At4g17486 PE=2 SV=1
mtr-miR156h-3p_1ss8AC	comp36642_c0	comp36642_c0	-
mtr-miR156h-3p_1ss8AC	comp43452_c0	comp43452_c0	-
mtr-miR156h-3p_1ss8AC	comp56409_c1	comp56409_c1	-		ko00270(Cysteine and methionine metabolism)
mtr-miR156h-3p_1ss8AC	comp47841_c0	comp47841_c0	-
mtr-miR156h-3p_1ss8AC	comp68258_c0	comp68258_c0	sp|Q93XX5|Y5713_ARATH PI-PLC X domain-containing protein At5g67130 OS=Arabidopsis thaliana GN=At5g67130 PE=1 SV=1	GO:0046658(anchored to plasma membrane);GO:0004629(phospholipase C activity);GO:0035556(intracellular signal transduction);GO:0006629(lipid metabolic process)
mtr-miR156h-3p_1ss8AC	comp46709_c0	comp46709_c0	-
mtr-miR156h-3p_1ss8AC	comp68215_c0	comp68215_c0	sp|O48780|KCS11_ARATH 3-ketoacyl-CoA synthase 11 OS=Arabidopsis thaliana GN=KCS11 PE=2 SV=1	GO:0016021(integral to membrane);GO:0033807(icosanoyl-CoA synthase activity);GO:0006633(fatty acid biosynthetic process);GO:0009409(response to cold);GO:0009416(response to light stimulus)
mtr-miR156h-3p_1ss8AC	comp61076_c0	comp61076_c0	-
mtr-miR156h-3p_1ss8AC	comp66651_c0	comp66651_c0	-
mtr-miR156h-3p_1ss8AC	comp68511_c0	comp68511_c0	sp|Q9SZR1|ACA10_ARATH Calcium-transporting ATPase 10, plasma membrane-type OS=Arabidopsis thaliana GN=ACA10 PE=1 SV=2	GO:0016021(integral to membrane);GO:0005886(plasma membrane);GO:0009506(plasmodesma);GO:0005524(ATP binding);GO:0005388(calcium-transporting ATPase activity);GO:0005516(calmodulin binding);GO:0046872(metal ion binding);GO:0006754(ATP biosynthetic process)
mtr-miR156h-3p_1ss8AC	comp230486_c0	comp230486_c0	-
mtr-miR156h-3p_1ss8AC	comp50390_c0	comp50390_c0	-
mtr-miR156h-3p_1ss8AC	comp99959_c0	comp99959_c0	sp|Q8S8Q6|TET8_ARATH Tetraspanin-8 OS=Arabidopsis thaliana GN=TET8 PE=2 SV=1
mtr-miR156h-3p_1ss8AC	comp60571_c0	comp60571_c0	sp|Q40665|TBB3_ORYSJ Tubulin beta-3 chain OS=Oryza sativa subsp. japonica GN=TUBB3 PE=1 SV=2	GO:0005874(microtubule);GO:0005525(GTP binding);GO:0003924(GTPase activity);GO:0005198(structural molecule activity);GO:0007018(microtubule-based movement);GO:0051258(protein polymerization)	ko04145(Phagosome);ko04540(Gap junction)
mtr-miR156h-3p_1ss8AC	comp58733_c0	comp58733_c0	sp|P49025|CTRO_MOUSE Citron Rho-interacting kinase OS=Mus musculus GN=Cit PE=1 SV=3	GO:0005737(cytoplasm);GO:0005524(ATP binding);GO:0046872(metal ion binding);GO:0004674(protein serine/threonine kinase activity);GO:0017124(SH3 domain binding);GO:0005083(small GTPase regulator activity);GO:0051301(cell division);GO:0048699(generation of neurons);GO:0035556(intracellular signal transduction);GO:0007067(mitosis)
mtr-miR156h-3p_1ss8AC	comp60433_c0	comp60433_c0	sp|Q9LSE2|ICE1_ARATH Transcription factor ICE1 OS=Arabidopsis thaliana GN=SCRM PE=1 SV=1	GO:0005634(nucleus);GO:0003677(DNA binding);GO:0045893(positive regulation of transcription, DNA-dependent);GO:0050826(response to freezing);GO:0010440(stomatal lineage progression);GO:0006351(transcription, DNA-dependent)
mtr-miR156h-3p_1ss8AC	comp44429_c0	comp44429_c0	-
mtr-miR156h-3p_1ss8AC	comp339132_c0	comp339132_c0	-
mtr-miR156h-3p_1ss8AC	comp51823_c0	comp51823_c0	-
mtr-miR156h-3p_1ss8AC	comp45375_c0	comp45375_c0	-
mtr-miR156h-3p_1ss8AC	comp52231_c0	comp52231_c0	-
mtr-miR156h-3p_1ss8AC	comp51201_c0	comp51201_c0	-
mtr-miR156h-3p_1ss8AC	comp50936_c0	comp50936_c0	-
mtr-miR156h-3p_1ss8AC	comp57117_c0	comp57117_c0	-
mtr-miR156h-3p_1ss8AC	comp41598_c0	comp41598_c0	sp|Q6NQ88|DDB2_ARATH Protein DAMAGED DNA-BINDING 2 OS=Arabidopsis thaliana GN=DDB2 PE=1 SV=1	GO:0005634(nucleus);GO:0003677(DNA binding);GO:0008270(zinc ion binding);GO:0006281(DNA repair);GO:0010224(response to UV-B)	ko03420(Nucleotide excision repair);ko04115(p53 signaling pathway);ko04120(Ubiquitin mediated proteolysis)
mtr-miR156h-3p_1ss8AC	comp58976_c0	comp58976_c0	sp|P42654|1433B_VICFA 14-3-3-like protein B OS=Vicia faba PE=2 SV=1	GO:0019904(protein domain specific binding)	ko04110(Cell cycle);ko04114(Oocyte meiosis);ko04722(Neurotrophin signaling pathway)
mtr-miR156h-3p_1ss8AC	comp58733_c0	comp58733_c0	sp|P49025|CTRO_MOUSE Citron Rho-interacting kinase OS=Mus musculus GN=Cit PE=1 SV=3	GO:0005737(cytoplasm);GO:0005524(ATP binding);GO:0046872(metal ion binding);GO:0004674(protein serine/threonine kinase activity);GO:0017124(SH3 domain binding);GO:0005083(small GTPase regulator activity);GO:0051301(cell division);GO:0048699(generation of neurons);GO:0035556(intracellular signal transduction);GO:0007067(mitosis)
mtr-miR156h-3p_1ss8AC	comp68067_c0	comp68067_c0	sp|Q94FT4|SALAT_PAPSO Salutaridinol 7-O-acetyltransferase OS=Papaver somniferum GN=SALAT PE=1 SV=1	GO:0047180(salutaridinol 7-O-acetyltransferase activity);GO:0009820(alkaloid metabolic process)
mtr-miR156h-3p_1ss8AC	comp58962_c0	comp58962_c0	-
mtr-miR156h-3p_1ss8AC	comp65013_c0	comp65013_c0	sp|Q8GX84|C3H1_ARATH Zinc finger CCCH domain-containing protein 1 OS=Arabidopsis thaliana GN=At1g01350 PE=2 SV=2	GO:0003677(DNA binding);GO:0008270(zinc ion binding)
mtr-miR156h-3p_1ss8AC	comp57748_c0	comp57748_c0	-
mtr-miR156h-3p_1ss8AC	comp596426_c0	comp596426_c0	-
mtr-miR156h-3p_1ss8AC	comp68546_c0	comp68546_c0	sp|P75793|PFLF_ECOLI Putative formate acetyltransferase 3 OS=Escherichia coli (strain K12) GN=ybiW PE=3 SV=1	GO:0005737(cytoplasm);GO:0008861(formate C-acetyltransferase activity);GO:0006006(glucose metabolic process)	ko00250(Alanine,ko aspartate and glutamate metabolism);ko00460(Cyanoamino acid metabolism);ko00910(Nitrogen metabolism)
mtr-miR156h-3p_1ss8AC	comp364465_c0	comp364465_c0	-
mtr-miR156h-3p_1ss8AC	comp33579_c0	comp33579_c0	-
mtr-miR156h-3p_1ss8AC	comp1043_c0	comp1043_c0	-
mtr-miR156h-3p_1ss8AC	comp68419_c0	comp68419_c0	sp|P52647|NIFJ_ECOLI Probable pyruvate-flavodoxin oxidoreductase OS=Escherichia coli (strain K12) GN=ydbK PE=3 SV=2	GO:0051539(4 iron, 4 sulfur cluster binding);GO:0009055(electron carrier activity);GO:0005506(iron ion binding);GO:0016903(oxidoreductase activity, acting on the aldehyde or oxo group of donors);GO:0030976(thiamine pyrophosphate binding);GO:0022900(electron transport chain);GO:0006810(transport)	ko00010(Glycolysis / Gluconeogenesis);ko00053(Ascorbate and aldarate metabolism);ko00071(Fatty acid metabolism);ko00280(Valine,ko leucine and isoleucine degradation);ko00310(Lysine degradation);ko00330(Arginine and proline metabolism);ko00340(Histidine metabolism);ko00380(Tryptophan metabolism);ko00410(beta-Alanine metabolism);ko00561(Glycerolipid metabolism);ko00620(Pyruvate metabolism);ko00631(…
mtr-miR156h-3p_1ss8AC	comp68423_c0	comp68423_c0	sp|P46474|YHDP_ECOLI Uncharacterized protein YhdP OS=Escherichia coli (strain K12) GN=yhdP PE=4 SV=4		ko00280(Valine,ko leucine and isoleucine degradation)
mtr-miR156h-3p_1ss8AC	comp68540_c0	comp68540_c0	sp|P33129|HTRE_ECOLI Outer membrane usher protein HtrE OS=Escherichia coli (strain K12) GN=htrE PE=1 SV=3	GO:0009279(cell outer membrane);GO:0016021(integral to membrane);GO:0005886(plasma membrane);GO:0005215(transporter activity);GO:0006950(response to stress)	ko00260(Glycine,ko serine and threonine metabolism);ko00290(Valine,ko leucine and isoleucine biosynthesis)
mtr-miR156h-3p_1ss8AC	comp784974_c0	comp784974_c0	-
mtr-miR156h-3p_1ss8AC	comp20190_c0	comp20190_c0	-
mtr-miR156h-3p_1ss8AC	comp287666_c0	comp287666_c0	-
mtr-miR156h-3p_1ss8AC	comp11828_c0	comp11828_c0	-
mtr-miR156h-3p_1ss8AC	comp30988_c0	comp30988_c0	-
mtr-miR156h-3p_1ss8AC	comp41732_c0	comp41732_c0	-
mtr-miR156h-3p_1ss8AC	comp482177_c0	comp482177_c0	-
mtr-miR156h-3p_1ss8AC	comp694822_c0	comp694822_c0	-
mtr-miR156h-3p_1ss8AC	comp36085_c0	comp36085_c0	-
mtr-miR156h-3p_1ss8AC	comp51968_c0	comp51968_c0	-
mtr-miR156h-3p_1ss8AC	comp960570_c0	comp960570_c0	-
mtr-miR156h-3p_1ss8AC	comp23728_c0	comp23728_c0	-
mtr-miR156h-3p_1ss8AC	comp318671_c0	comp318671_c0	-
mtr-miR156h-3p_1ss8AC	comp240352_c0	comp240352_c0	-
mtr-miR156h-3p_1ss8AC	comp50532_c0	comp50532_c0	-
mtr-miR156h-3p_1ss8AC	comp35784_c0	comp35784_c0	-
mtr-miR156h-3p_1ss8AC	comp27906_c0	comp27906_c0	-
mtr-miR156h-3p_1ss8AC	comp649301_c0	comp649301_c0	-
mtr-miR156h-3p_1ss8AC	comp318240_c0	comp318240_c0	-
mtr-miR156h-3p_1ss8AC	comp26350_c0	comp26350_c0	-
mtr-miR156h-3p_1ss8AC	comp270820_c0	comp270820_c0	sp|O49445|LRK72_ARATH Probable L-type lectin-domain containing receptor kinase VII.2 OS=Arabidopsis thaliana GN=LECRK72 PE=1 SV=2	GO:0016021(integral to membrane);GO:0005886(plasma membrane);GO:0005524(ATP binding);GO:0004674(protein serine/threonine kinase activity);GO:0004872(receptor activity);GO:0005529(sugar binding)
mtr-miR156h-3p_1ss8AC	comp44002_c0	comp44002_c0	-
mtr-miR156h-3p_1ss8AC	comp548503_c0	comp548503_c0	-
mtr-miR156h-3p_1ss8AC	comp14470_c0	comp14470_c0	-
mtr-miR156h-3p_1ss8AC	comp56740_c0	comp56740_c0	-
mtr-miR156h-3p_1ss8AC	comp26021_c0	comp26021_c0	-
mtr-miR156h-3p_1ss8AC	comp486803_c0	comp486803_c0	sp|O81832|Y4729_ARATH G-type lectin S-receptor-like serine/threonine-protein kinase At4g27290 OS=Arabidopsis thaliana GN=At4g27290 PE=3 SV=4	GO:0016021(integral to membrane);GO:0044459(plasma membrane part);GO:0005524(ATP binding);GO:0005516(calmodulin binding);GO:0004674(protein serine/threonine kinase activity);GO:0004872(receptor activity);GO:0005529(sugar binding);GO:0048544(recognition of pollen)	ko00270(Cysteine and methionine metabolism)
mtr-miR156h-3p_1ss8AC	comp938011_c0	comp938011_c0	-
mtr-miR156h-3p_1ss8AC	comp66331_c0	comp66331_c0	sp|P0A9M8|PTA_ECOLI Phosphate acetyltransferase OS=Escherichia coli (strain K12) GN=pta PE=1 SV=2	GO:0005737(cytoplasm);GO:0008959(phosphate acetyltransferase activity);GO:0005515(protein binding);GO:0008270(zinc ion binding);GO:0019413(acetate biosynthetic process);GO:0045733(acetate catabolic process);GO:0019427(acetyl-CoA biosynthetic process from acetate);GO:0070689(L-threonine catabolic process to propionate)	ko00230(Purine metabolism);ko00250(Alanine,ko aspartate and glutamate metabolism)
mtr-miR156h-3p_1ss8AC	comp68240_c0	comp68240_c0	sp|P37637|MDTF_ECOLI Multidrug resistance protein MdtF OS=Escherichia coli (strain K12) GN=mdtF PE=1 SV=1	GO:0016021(integral to membrane);GO:0005886(plasma membrane);GO:0005215(transporter activity);GO:0046677(response to antibiotic)	ko00250(Alanine,ko aspartate and glutamate metabolism);ko00410(beta-Alanine metabolism);ko00430(Taurine and hypotaurine metabolism);ko00650(Butanoate metabolism)
mtr-miR156h-3p_1ss8AC	comp6691_c0	comp6691_c0	sp|B1A920|ATPA_CARPA ATP synthase subunit alpha, chloroplastic OS=Carica papaya GN=atpA PE=3 SV=1	GO:0009535(chloroplast thylakoid membrane);GO:0045261(proton-transporting ATP synthase complex, catalytic core F);GO:0005524(ATP binding);GO:0046933(hydrogen ion transporting ATP synthase activity, rotational mechanism);GO:0046961(proton-transporting ATPase activity, rotational mechanism);GO:0015991(ATP hydrolysis coupled proton transport);GO:0015986(ATP synthesis coupled proton transport)	ko00190(Oxidative phosphorylation);ko00195(Photosynthesis)
mtr-miR156h-3p_1ss8AC	comp621687_c0	comp621687_c0	sp|Q9SUH6|PP341_ARATH Pentatricopeptide repeat-containing protein At4g30700 OS=Arabidopsis thaliana GN=DYW9 PE=2 SV=1	GO:0005488(binding)
mtr-miR156h-3p_1ss8AC	comp183066_c0	comp183066_c0	sp|Q682D3|XRCC2_ARATH DNA repair protein XRCC2 homolog OS=Arabidopsis thaliana GN=XRCC2 PE=2 SV=2	GO:0005634(nucleus);GO:0003677(DNA binding);GO:0000724(double-strand break repair via homologous recombination);GO:0007131(reciprocal meiotic recombination)	ko03440(Homologous recombination)
mtr-miR156h-3p_1ss8AC	comp37236_c0	comp37236_c0	-
mtr-miR156h-3p_1ss8AC	comp903941_c0	comp903941_c0	-
mtr-miR156h-3p_1ss8AC	comp31325_c0	comp31325_c0	-
mtr-miR156h-3p_1ss8AC	comp34842_c0	comp34842_c0	-
mtr-miR156h-3p_1ss8AC	comp48796_c0	comp48796_c0	-
mtr-miR156h-3p_1ss8AC	comp48060_c0	comp48060_c0	-
mtr-miR156h-3p_1ss8AC	comp67737_c0	comp67737_c0	sp|P37650|BCSC_ECOLI Cellulose synthase operon protein C OS=Escherichia coli (strain K12) GN=bcsC PE=1 SV=3	GO:0019867(outer membrane);GO:0005488(binding);GO:0030244(cellulose biosynthetic process)
mtr-miR156h-3p_1ss8AC	comp66965_c0	comp66965_c0	sp|P17888|PRIA_ECOLI Primosomal protein N' OS=Escherichia coli (strain K12) GN=priA PE=1 SV=2	GO:0005658(alpha DNA polymerase:primase complex);GO:0005524(ATP binding);GO:0008026(ATP-dependent helicase activity);GO:0003677(DNA binding);GO:0046872(metal ion binding);GO:0006269(DNA replication, synthesis of RNA primer)	ko00561(Glycerolipid metabolism);ko03320(PPAR signaling pathway);ko04626(Plant-pathogen interaction)
mtr-miR156h-3p_1ss8AC	comp469002_c0	comp469002_c0	-
mtr-miR156h-3p_1ss8AC	comp13756_c0	comp13756_c0	sp|P51109|DFRA_MEDSA Dihydroflavonol-4-reductase (Fragment) OS=Medicago sativa GN=DFR1 PE=2 SV=1	GO:0050662(coenzyme binding);GO:0045552(dihydrokaempferol 4-reductase activity);GO:0009813(flavonoid biosynthetic process)
mtr-miR156h-3p_1ss8AC	comp205601_c0	comp205601_c0	-
mtr-miR156h-3p_1ss8AC	comp22002_c0	comp22002_c0	-
mtr-miR156h-3p_1ss8AC	comp45059_c0	comp45059_c0	sp|Q9LF46|HACL_ARATH 2-hydroxyacyl-CoA lyase OS=Arabidopsis thaliana GN=HACL PE=2 SV=1	GO:0005829(cytosol);GO:0016831(carboxy-lyase activity);GO:0000287(magnesium ion binding);GO:0030976(thiamine pyrophosphate binding);GO:0016740(transferase activity)
mtr-miR156h-3p_1ss8AC	comp5526_c0	comp5526_c0	sp|Q8RY16|PEX6_ARATH Peroxisome biogenesis protein 6 OS=Arabidopsis thaliana GN=PEX6 PE=1 SV=1	GO:0005737(cytoplasm);GO:0005524(ATP binding);GO:0017111(nucleoside-triphosphatase activity);GO:0006635(fatty acid beta-oxidation);GO:0016558(protein import into peroxisome matrix)
mtr-miR156h-3p_1ss8AC	comp20185_c0	comp20185_c0	-
mtr-miR156h-3p_1ss8AC	comp1298164_c0	comp1298164_c0	-
mtr-miR156h-3p_1ss8AC	comp30448_c0	comp30448_c0	-
mtr-miR156h-3p_1ss8AC	comp57615_c0	comp57615_c0	-		ko00630(Glyoxylate and dicarboxylate metabolism);ko00710(Carbon fixation in photosynthetic organisms)
mtr-miR156h-3p_1ss8AC	comp51823_c0	comp51823_c0	-
mtr-miR156h-3p_1ss8AC	comp64476_c0	comp64476_c0	-
mtr-miR156h-3p_1ss8AC	comp52438_c0	comp52438_c0	-
mtr-miR156h-3p_1ss8AC	comp33970_c0	comp33970_c0	-
mtr-miR156h-3p_1ss8AC	comp40814_c0	comp40814_c0	-
mtr-miR156h-3p_1ss8AC	comp48078_c0	comp48078_c0	-
mtr-miR156h-3p_1ss8AC	comp36598_c0	comp36598_c0	sp|B3DNN5|CDC16_ARATH Anaphase-promoting complex subunit 6 OS=Arabidopsis thaliana GN=APC6 PE=2 SV=1	GO:0005634(nucleus);GO:0005488(binding);GO:0051301(cell division);GO:0007067(mitosis);GO:0010087(phloem or xylem histogenesis);GO:0032875(regulation of DNA endoreduplication)	ko04110(Cell cycle);ko04114(Oocyte meiosis);ko04120(Ubiquitin mediated proteolysis);ko04914(Progesterone-mediated oocyte maturation)
mtr-miR156h-3p_1ss8AC	comp44304_c0	comp44304_c0	sp|Q4R4V2|PPM1G_MACFA Protein phosphatase 1G OS=Macaca fascicularis GN=PPM1G PE=2 SV=1	GO:0005737(cytoplasm);GO:0008287(protein serine/threonine phosphatase complex);GO:0046872(metal ion binding);GO:0004722(protein serine/threonine phosphatase activity);GO:0006470(protein dephosphorylation)
mtr-miR156h-3p_1ss8AC	comp6674_c0	comp6674_c0	-
mtr-miR156h-3p_1ss8AC	comp56785_c0	comp56785_c0	-
mtr-miR156h-3p_1ss8AC	comp33036_c0	comp33036_c0	-
mtr-miR156h-3p_1ss8AC	comp67388_c0	comp67388_c0	sp|Q8FBP0|CYAA_ECOL6 Adenylate cyclase OS=Escherichia coli O6:H1 (strain CFT073 / ATCC 700928 / UPEC) GN=cyaA PE=3 SV=1	GO:0005737(cytoplasm);GO:0004016(adenylate cyclase activity);GO:0005524(ATP binding)	ko03420(Nucleotide excision repair);ko03430(Mismatch repair)
mtr-miR156h-3p_1ss8AC	comp391332_c0	comp391332_c0	-
mtr-miR156h-3p_1ss8AC	comp916752_c0	comp916752_c0	-
mtr-miR156h-3p_1ss8AC	comp56662_c0	comp56662_c0	-
mtr-miR156h-3p_1ss8AC	comp27456_c0	comp27456_c0	-
mtr-miR156h-3p_1ss8AC	comp350451_c0	comp350451_c0	-
mtr-miR156h-3p_1ss8AC	comp269529_c0	comp269529_c0	-
mtr-miR156h-3p_1ss8AC	comp45713_c0	comp45713_c0	-
mtr-miR156h-3p_1ss8AC	comp234682_c0	comp234682_c0	-
mtr-miR156h-3p_1ss8AC	comp67348_c0	comp67348_c0	sp|P03749|VHSJ_LAMBD Host specificity protein J OS=Enterobacteria phage lambda GN=J PE=4 SV=1	GO:0044419(interspecies interaction between organisms)
mtr-miR156h-3p_1ss8AC	comp62732_c0	comp62732_c0	-
mtr-miR156h-3p_1ss8AC	comp53391_c1	comp53391_c1	-
mtr-miR156h-3p_1ss8AC	comp44305_c0	comp44305_c0	-
mtr-miR156h-3p_1ss8AC	comp34790_c0	comp34790_c0	sp|P69781|GAT12_ARATH GATA transcription factor 12 OS=Arabidopsis thaliana GN=GATA12 PE=2 SV=1	GO:0005634(nucleus);GO:0043565(sequence-specific DNA binding);GO:0003700(sequence-specific DNA binding transcription factor activity);GO:0008270(zinc ion binding);GO:0007623(circadian rhythm);GO:0045893(positive regulation of transcription, DNA-dependent);GO:0009416(response to light stimulus)
mtr-miR156h-3p_1ss8AC	comp59105_c0	comp59105_c0	sp|Q9ZQG8|FER3_ARATH Ferredoxin-3, chloroplastic OS=Arabidopsis thaliana GN=FD3 PE=1 SV=1	GO:0009507(chloroplast);GO:0051537(2 iron, 2 sulfur cluster binding);GO:0009055(electron carrier activity);GO:0046872(metal ion binding);GO:0022900(electron transport chain);GO:0006810(transport)	ko00195(Photosynthesis)
mtr-miR156h-3p_1ss8AC	comp253161_c0	comp253161_c0	-
mtr-miR156h-3p_1ss8AC	comp38320_c0	comp38320_c0	-
mtr-miR156h-3p_1ss8AC	comp180594_c0	comp180594_c0	-
mtr-miR156h-3p_1ss8AC	comp219209_c0	comp219209_c0	sp|P46897|ATHB7_ARATH Homeobox-leucine zipper protein ATHB-7 OS=Arabidopsis thaliana GN=ATHB-7 PE=2 SV=2	GO:0005634(nucleus);GO:0043565(sequence-specific DNA binding);GO:0003700(sequence-specific DNA binding transcription factor activity);GO:0009738(abscisic acid mediated signaling pathway);GO:0045893(positive regulation of transcription, DNA-dependent);GO:0009414(response to water deprivation)
mtr-miR156h-3p_1ss8AC	comp236078_c0	comp236078_c0	-
mtr-miR156h-3p_1ss8AC	comp901410_c0	comp901410_c0	-
mtr-miR156h-3p_1ss8AC	comp387097_c0	comp387097_c0	-
mtr-miR156h-3p_1ss8AC	comp226874_c0	comp226874_c0	-
mtr-miR156h-3p_1ss8AC	comp57118_c0	comp57118_c0	sp|P10378|ENTE_ECOLI Enterobactin synthase component E OS=Escherichia coli (strain K12) GN=entE PE=1 SV=3	GO:0008668();GO:0005524(ATP binding);GO:0016874(ligase activity);GO:0016746(transferase activity, transferring acyl groups);GO:0009239(enterobactin biosynthetic process)
mtr-miR156h-3p_1ss8AC	comp29077_c0	comp29077_c0	sp|Q9LT23|BH121_ARATH Transcription factor bHLH121 OS=Arabidopsis thaliana GN=BHLH121 PE=2 SV=1	GO:0005634(nucleus);GO:0003677(DNA binding);GO:0006355(regulation of transcription, DNA-dependent);GO:0006351(transcription, DNA-dependent)
mtr-miR156h-3p_1ss8AC	comp65679_c1	comp65679_c1	sp|P51132|UCRI2_TOBAC Cytochrome b-c1 complex subunit Rieske-2, mitochondrial OS=Nicotiana tabacum PE=2 SV=1	GO:0016021(integral to membrane);GO:0005743(mitochondrial inner membrane);GO:0070469(respiratory chain);GO:0051537(2 iron, 2 sulfur cluster binding);GO:0046872(metal ion binding);GO:0008121(ubiquinol-cytochrome-c reductase activity);GO:0022900(electron transport chain)	ko00190(Oxidative phosphorylation);ko04260(Cardiac muscle contraction)
mtr-miR156h-3p_1ss8AC	comp17689_c0	comp17689_c0	sp|P0C035|ATL60_ARATH RING-H2 finger protein ATL60 OS=Arabidopsis thaliana GN=ATL60 PE=2 SV=1	GO:0016021(integral to membrane);GO:0008270(zinc ion binding)
mtr-miR156h-3p_1ss8AC	comp312451_c0	comp312451_c0	sp|Q2PCF1|PDR2_NICPL Pleiotropic drug resistance protein 2 OS=Nicotiana plumbaginifolia GN=PDR2 PE=2 SV=1	GO:0016021(integral to membrane);GO:0005524(ATP binding);GO:0016887(ATPase activity);GO:0006810(transport)
mtr-miR156h-3p_1ss8AC	comp530151_c0	comp530151_c0	-
mtr-miR156h-3p_1ss8AC	comp52881_c0	comp52881_c0	sp|Q93Y40|ORP3C_ARATH Oxysterol-binding protein-related protein 3C OS=Arabidopsis thaliana GN=ORP3C PE=2 SV=1	GO:0005829(cytosol);GO:0008289(lipid binding);GO:0006869(lipid transport)
mtr-miR156h-3p_1ss8AC	comp40495_c0	comp40495_c0	-
mtr-miR156h-3p_1ss8AC	comp50725_c0	comp50725_c0	-
mtr-miR156h-3p_1ss8AC	comp63927_c0	comp63927_c0	sp|Q40532|NTF4_TOBAC Mitogen-activated protein kinase homolog NTF4 OS=Nicotiana tabacum GN=NTF4 PE=2 SV=1	GO:0005524(ATP binding);GO:0004707(MAP kinase activity)	ko04010(MAPK signaling pathway);ko04012(ErbB signaling pathway);ko04062(Chemokine signaling pathway);ko04114(Oocyte meiosis);ko04150(mTOR signaling pathway);ko04270(Vascular smooth muscle contraction);ko04320(Dorso-ventral axis formation);ko04350(TGF-beta signaling pathway);ko04360(Axon guidance);ko04370(VEGF signaling pathway);ko04510(Focal adhesion);ko04520(Adherens junction);ko04540(Gap juncti…
mtr-miR156h-3p_1ss8AC	comp319573_c0	comp319573_c0	-
mtr-miR156h-3p_1ss8AC	comp58888_c0	comp58888_c0	-
mtr-miR156h-3p_1ss8AC	comp952093_c0	comp952093_c0	-
mtr-miR156h-3p_1ss8AC	comp58579_c0	comp58579_c0	-
mtr-miR156h-3p_1ss8AC	comp20845_c0	comp20845_c0	-
mtr-miR156h-3p_1ss8AC	comp44921_c0	comp44921_c0	sp|O64732|U87A1_ARATH UDP-glycosyltransferase 87A1 OS=Arabidopsis thaliana GN=UGT87A1 PE=2 SV=1	GO:0016758(transferase activity, transferring hexosyl groups)
mtr-miR156h-3p_1ss8AC	comp49074_c0	comp49074_c0	-
mtr-miR156h-3p_1ss8AC	comp402588_c0	comp402588_c0	-
mtr-miR156h-3p_1ss8AC	comp402597_c0	comp402597_c0	-
mtr-miR156h-3p_1ss8AC	comp61869_c0	comp61869_c0	sp|P37219|ASR2_SOLLC Abscisic stress-ripening protein 2 OS=Solanum lycopersicum GN=ASR2 PE=4 SV=1	GO:0006950(response to stress)
mtr-miR156h-3p_1ss8AC	comp38915_c0	comp38915_c0	sp|P42738|CM1_ARATH Chorismate mutase 1, chloroplastic OS=Arabidopsis thaliana GN=CM1 PE=1 SV=3	GO:0009507(chloroplast);GO:0005829(cytosol);GO:0004106(chorismate mutase activity);GO:0009073(aromatic amino acid family biosynthetic process)	ko00400(Phenylalanine,ko tyrosine and tryptophan biosynthesis)
mtr-miR156h-3p_1ss8AC	comp113755_c0	comp113755_c0	-		ko03022(Basal transcription factors)
mtr-miR156h-3p_1ss8AC	comp64162_c0	comp64162_c0	-
mtr-miR156h-3p_1ss8AC	comp44236_c0	comp44236_c0	-
mtr-miR156h-3p_1ss8AC	comp647182_c0	comp647182_c0	sp|Q9SEX2|KTNA1_ARATH Katanin p60 ATPase-containing subunit A1 OS=Arabidopsis thaliana GN=AAA1 PE=1 SV=1	GO:0005737(cytoplasm);GO:0005874(microtubule);GO:0005524(ATP binding);GO:0008568(microtubule-severing ATPase activity);GO:0005515(protein binding);GO:0043622(cortical microtubule organization);GO:0009825(multidimensional cell growth);GO:0009832(plant-type cell wall biogenesis);GO:0010091(trichome branching)
mtr-miR156h-3p_1ss8AC	comp48307_c0	comp48307_c0	sp|Q13427|PPIG_HUMAN Peptidyl-prolyl cis-trans isomerase G OS=Homo sapiens GN=PPIG PE=1 SV=2	GO:0016363(nuclear matrix);GO:0016607(nuclear speck);GO:0016018(cyclosporin A binding);GO:0003755(peptidyl-prolyl cis-trans isomerase activity);GO:0006457(protein folding);GO:0008380(RNA splicing)
mtr-miR156h-3p_1ss8AC	comp4737_c0	comp4737_c0	-
mtr-miR156h-3p_1ss8AC	comp58902_c0	comp58902_c0	sp|P52837|F4ST_FLACH Flavonol 4'-sulfotransferase OS=Flaveria chlorifolia PE=1 SV=1	GO:0005737(cytoplasm);GO:0008146(sulfotransferase activity)	ko00380(Tryptophan metabolism);ko00966(Glucosinolate biosynthesis)
mtr-miR156h-3p_1ss8AC	comp46111_c0	comp46111_c0	-
mtr-miR156h-3p_1ss8AC	comp3603_c0	comp3603_c0	sp|O82248|NFYB5_ARATH Nuclear transcription factor Y subunit B-5 OS=Arabidopsis thaliana GN=NFYB5 PE=2 SV=1	GO:0005634(nucleus);GO:0043565(sequence-specific DNA binding);GO:0006355(regulation of transcription, DNA-dependent);GO:0006351(transcription, DNA-dependent)
mtr-miR156h-3p_1ss8AC	comp56012_c0	comp56012_c0	-
mtr-miR156h-3p_1ss8AC	comp45020_c0	comp45020_c0	-
mtr-miR156h-3p_1ss8AC	comp46388_c0	comp46388_c0	sp|Q17336|CWC22_CAEEL Pre-mRNA-splicing factor CWC22 homolog OS=Caenorhabditis elegans GN=let-858 PE=2 SV=1	GO:0043073(germ cell nucleus);GO:0000790(nuclear chromatin);GO:0005654(nucleoplasm);GO:0005681(spliceosomal complex);GO:0003723(RNA binding);GO:0009792(embryo development ending in birth or egg hatching);GO:0007369(gastrulation);GO:0042078(germ-line stem cell division);GO:0040007(growth);GO:0018996(molting cycle, collagen and cuticulin-based cuticle);GO:0006397(mRNA processing);GO:0002119(nematod…
mtr-miR156h-3p_1ss8AC	comp31701_c0	comp31701_c0	sp|Q9C7F5|NTF2_ARATH Nuclear transport factor 2 OS=Arabidopsis thaliana GN=NTF2 PE=2 SV=1	GO:0005829(cytosol);GO:0005635(nuclear envelope);GO:0005886(plasma membrane);GO:0008536(Ran GTPase binding);GO:0006606(protein import into nucleus)
mtr-miR156h-3p_1ss8AC	comp16892_c0	comp16892_c0	-
mtr-miR156h-3p_1ss8AC	comp54716_c0	comp54716_c0	sp|P63737|CARB_ECO57 Carbamoyl-phosphate synthase large chain OS=Escherichia coli O157:H7 GN=carB PE=3 SV=2	GO:0005524(ATP binding);GO:0004088(carbamoyl-phosphate synthase );GO:0046872(metal ion binding);GO:0006526(arginine biosynthetic process);GO:0006221(pyrimidine nucleotide biosynthetic process)	ko00240(Pyrimidine metabolism);ko00250(Alanine,ko aspartate and glutamate metabolism)
mtr-miR156h-3p_1ss8AC	comp53825_c0	comp53825_c0	sp|B5DE93|CDK12_XENTR Cyclin-dependent kinase 12 OS=Xenopus tropicalis GN=cdk12 PE=2 SV=1	GO:0019908(nuclear cyclin-dependent protein kinase holoenzyme complex);GO:0016607(nuclear speck);GO:0005524(ATP binding);GO:0004693(cyclin-dependent protein kinase activity);GO:0008353(RNA polymerase II carboxy-terminal domain kinase activity);GO:0006397(mRNA processing);GO:0070816(phosphorylation of RNA polymerase II C-terminal domain);GO:0043405(regulation of MAP kinase activity);GO:0008380(RNA…
mtr-miR156h-3p_1ss8AC	comp56961_c0	comp56961_c0	sp|Q84WM9|EF1B1_ARATH Elongation factor 1-beta 1 OS=Arabidopsis thaliana GN=At5g12110 PE=2 SV=2	GO:0005853(eukaryotic translation elongation factor 1 complex);GO:0005886(plasma membrane);GO:0003746(translation elongation factor activity)
mtr-miR156h-3p_1ss8AC	comp60087_c0	comp60087_c0	sp|P25469|H2A1_SOLLC Histone H2A.1 OS=Solanum lycopersicum PE=2 SV=1	GO:0000786(nucleosome);GO:0005634(nucleus);GO:0003677(DNA binding);GO:0006334(nucleosome assembly)
mtr-miR156h-3p_1ss8AC	comp66346_c0	comp66346_c0	sp|P09886|HS21C_PEA Small heat shock protein, chloroplastic OS=Pisum sativum GN=HSP21 PE=2 SV=1	GO:0009507(chloroplast);GO:0006950(response to stress)
mtr-miR156h-3p_1ss8AC	comp51494_c0	comp51494_c0	-
mtr-miR156h-3p_1ss8AC	comp2340_c0	comp2340_c0	-
mtr-miR156h-3p_1ss8AC	comp60655_c0	comp60655_c0	-
mtr-miR156h-3p_1ss8AC	comp8140_c0	comp8140_c0	-
mtr-miR156h-3p_1ss8AC	comp54553_c0	comp54553_c0	-
mtr-miR156h-3p_1ss8AC	comp58562_c0	comp58562_c0	sp|P75785|YBIP_ECOLI Putative phosphoethanolamine transferase YbiP OS=Escherichia coli (strain K12) GN=ybiP PE=1 SV=1	GO:0016021(integral to membrane);GO:0005886(plasma membrane);GO:0008484(sulfuric ester hydrolase activity);GO:0016740(transferase activity)
mtr-miR156h-3p_1ss8AC	comp38918_c0	comp38918_c0	-
mtr-miR156h-3p_1ss8AC	comp53593_c1	comp53593_c1	sp|Q9LE33|HPR3_ARATH Glyoxylate/hydroxypyruvate reductase HPR3 OS=Arabidopsis thaliana GN=HPR3 PE=2 SV=1
mtr-miR156h-3p_1ss8AC	comp15943_c0	comp15943_c0	-
mtr-miR156h-3p_1ss8AC	comp259211_c0	comp259211_c0	sp|Q9LV48|PERK1_ARATH Proline-rich receptor-like protein kinase PERK1 OS=Arabidopsis thaliana GN=PERK1 PE=1 SV=1	GO:0016021(integral to membrane);GO:0005886(plasma membrane);GO:0005524(ATP binding);GO:0004674(protein serine/threonine kinase activity);GO:0046777(protein autophosphorylation)
mtr-miR156h-3p_1ss8AC	comp57863_c1	comp57863_c1	sp|Q9LEY9|NHP2_ARATH H/ACA ribonucleoprotein complex subunit 2-like protein OS=Arabidopsis thaliana GN=At5g08180 PE=1 SV=1	GO:0005730(nucleolus);GO:0005732(small nucleolar ribonucleoprotein complex);GO:0030515(snoRNA binding);GO:0031118(rRNA pseudouridine synthesis)
mtr-miR156h-3p_1ss8AC	comp64824_c0	comp64824_c0	sp|Q9FYL3|ALB31_ARATH ALBINO3-like protein 1, chloroplastic OS=Arabidopsis thaliana GN=ALB3L1 PE=2 SV=3	GO:0009535(chloroplast thylakoid membrane);GO:0016021(integral to membrane);GO:0009658(chloroplast organization);GO:0051205(protein insertion into membrane)	ko03060(Protein export);ko03070(Bacterial secretion system)
mtr-miR156h-3p_1ss8AC	comp59831_c0	comp59831_c0	sp|Q9LKL2|APRR1_ARATH Two-component response regulator-like APRR1 OS=Arabidopsis thaliana GN=APRR1 PE=1 SV=1	GO:0005634(nucleus);GO:0005515(protein binding);GO:0000156(two-component response regulator activity);GO:0007623(circadian rhythm);GO:0010031(circumnutation);GO:0006355(regulation of transcription, DNA-dependent);GO:0006351(transcription, DNA-dependent)	ko04712(Circadian rhythm - plant)
mtr-miR156h-3p_1ss8AC	comp48632_c0	comp48632_c0	-
mtr-miR156h-3p_1ss8AC	comp6263_c0	comp6263_c0	sp|P62598|ARR12_ARATH Two-component response regulator ARR12 OS=Arabidopsis thaliana GN=ARR12 PE=2 SV=2	GO:0005634(nucleus);GO:0003677(DNA binding);GO:0000156(two-component response regulator activity);GO:0009736(cytokinin mediated signaling pathway);GO:0006355(regulation of transcription, DNA-dependent);GO:0006351(transcription, DNA-dependent)	ko04712(Circadian rhythm - plant)
mtr-miR156h-3p_1ss8AC	comp57851_c0	comp57851_c0	-
mtr-miR156h-3p_1ss8AC	comp66550_c0	comp66550_c0	sp|P48147|PPCE_HUMAN Prolyl endopeptidase OS=Homo sapiens GN=PREP PE=1 SV=2	GO:0004252(serine-type endopeptidase activity);GO:0070008(serine-type exopeptidase activity);GO:0006508(proteolysis)
mtr-miR156h-3p_1ss8AC	comp58139_c0	comp58139_c0	-
mtr-miR156h-3p_1ss8AC	comp37579_c0	comp37579_c0	-
mtr-miR156h-3p_1ss8AC	comp67742_c0	comp67742_c0	sp|Q9C5E5|DGK5_ARATH Diacylglycerol kinase 5 OS=Arabidopsis thaliana GN=DGK5 PE=2 SV=1		ko00561(Glycerolipid metabolism);ko00564(Glycerophospholipid metabolism);ko04070(Phosphatidylinositol signaling system)
mtr-miR156h-3p_1ss8AC	comp4891_c0	comp4891_c0	-
mtr-miR156h-3p_1ss8AC	comp39468_c0	comp39468_c0	-
mtr-miR156h-3p_1ss8AC	comp66077_c0	comp66077_c0	sp|Q40554|EIF3A_TOBAC Eukaryotic translation initiation factor 3 subunit A OS=Nicotiana tabacum GN=TIF3A1 PE=2 SV=1	GO:0005737(cytoplasm);GO:0003743(translation initiation factor activity)
mtr-miR156h-3p_1ss8AC	comp47374_c0	comp47374_c0	sp|Q9SUE3|CRF4_ARATH Ethylene-responsive transcription factor CRF4 OS=Arabidopsis thaliana GN=CRF4 PE=1 SV=2	GO:0005737(cytoplasm);GO:0005634(nucleus);GO:0003677(DNA binding);GO:0005515(protein binding);GO:0003700(sequence-specific DNA binding transcription factor activity);GO:0009736(cytokinin mediated signaling pathway);GO:0009873(ethylene mediated signaling pathway);GO:0048366(leaf development);GO:0042991(transcription factor import into nucleus)
mtr-miR156h-3p_1ss8AC	comp51835_c2	comp51835_c2	sp|O65554|CIPK6_ARATH CBL-interacting serine/threonine-protein kinase 6 OS=Arabidopsis thaliana GN=CIPK6 PE=1 SV=1	GO:0005524(ATP binding);GO:0005515(protein binding);GO:0004674(protein serine/threonine kinase activity);GO:0010540(basipetal auxin transport);GO:0042538(hyperosmotic salinity response);GO:0007275(multicellular organismal development);GO:0009414(response to water deprivation);GO:0007165(signal transduction)
mtr-miR156h-3p_1ss8AC	comp66556_c1	comp66556_c1	sp|P36938|PGM_ECOLI Phosphoglucomutase OS=Escherichia coli (strain K12) GN=pgm PE=1 SV=1	GO:0005829(cytosol);GO:0000287(magnesium ion binding);GO:0004614(phosphoglucomutase activity);GO:0016052(carbohydrate catabolic process);GO:0019255(glucose 1-phosphate metabolic process)	ko00010(Glycolysis / Gluconeogenesis);ko00030(Pentose phosphate pathway);ko00052(Galactose metabolism);ko00500(Starch and sucrose metabolism);ko00520(Amino sugar and nucleotide sugar metabolism);ko00521(Streptomycin biosynthesis)
mtr-miR156h-3p_1ss8AC	comp17705_c0	comp17705_c0	-
mtr-miR156h-3p_1ss8AC	comp58036_c0	comp58036_c0	-
mtr-miR156h-3p_1ss8AC	comp48360_c0	comp48360_c0	-
mtr-miR156h-3p_1ss8AC	comp16593_c0	comp16593_c0	sp|Q9LX66|HERK_ARATH Receptor-like protein kinase HERK 1 OS=Arabidopsis thaliana GN=HERK1 PE=1 SV=1	GO:0016021(integral to membrane);GO:0005886(plasma membrane);GO:0009506(plasmodesma);GO:0005524(ATP binding);GO:0004674(protein serine/threonine kinase activity);GO:0004872(receptor activity);GO:0009742(brassinosteroid mediated signaling pathway);GO:0009791(post-embryonic development);GO:0051510(regulation of unidimensional cell growth);GO:0009826(unidimensional cell growth)	ko04210(Apoptosis);ko04620(Toll-like receptor signaling pathway);ko04722(Neurotrophin signaling pathway)
mtr-miR156h-3p_1ss8AC	comp53018_c0	comp53018_c0	sp|Q9STM4|C3H43_ARATH Zinc finger CCCH domain-containing protein 43 OS=Arabidopsis thaliana GN=At3g48440 PE=1 SV=1	GO:0005634(nucleus);GO:0003677(DNA binding);GO:0008270(zinc ion binding)
mtr-miR156h-3p_1ss8AC	comp33426_c0	comp33426_c0	-
mtr-miR156h-3p_1ss8AC	comp53059_c0	comp53059_c0	sp|Q9LHG8|ELC_ARATH Protein ELC OS=Arabidopsis thaliana GN=ELC PE=1 SV=1	GO:0005769(early endosome);GO:0005770(late endosome);GO:0043234(protein complex);GO:0043130(ubiquitin binding);GO:0051301(cell division);GO:0006464(protein modification process);GO:0015031(protein transport);GO:0010091(trichome branching)	ko04144(Endocytosis)
mtr-miR156h-3p_1ss8AC	comp38669_c0	comp38669_c0	-
mtr-miR156h-3p_1ss8AC	comp50977_c0	comp50977_c0	-
mtr-miR156h-3p_1ss8AC	comp59615_c0	comp59615_c0	-
mtr-miR156h-3p_1ss8AC	comp48538_c0	comp48538_c0	sp|Q04716|RT03_PETHY Ribosomal protein S3, mitochondrial OS=Petunia hybrida GN=YRPS3 PE=2 SV=1	GO:0005739(mitochondrion);GO:0005840(ribosome);GO:0003723(RNA binding);GO:0003735(structural constituent of ribosome);GO:0006412(translation)
mtr-miR156h-3p_1ss8AC	comp404119_c0	comp404119_c0	-
mtr-miR156h-3p_1ss8AC	comp61345_c0	comp61345_c0	sp|F4HQD4|HSP7P_ARATH Heat shock 70 kDa protein 15 OS=Arabidopsis thaliana GN=HSP70-15 PE=2 SV=1		ko04612(Antigen processing and presentation)
mtr-miR156h-3p_1ss8AC	comp33794_c0	comp33794_c0	sp|Q9LJL3|PREP1_ARATH Presequence protease 1, chloroplastic/mitochondrial OS=Arabidopsis thaliana GN=PREP1 PE=1 SV=2	GO:0048046(apoplast);GO:0009941(chloroplast envelope);GO:0009570(chloroplast stroma);GO:0005759(mitochondrial matrix);GO:0004222(metalloendopeptidase activity);GO:0008270(zinc ion binding);GO:0016485(protein processing);GO:0006508(proteolysis);GO:0046686(response to cadmium ion)
mtr-miR156h-3p_1ss8AC	comp644927_c0	comp644927_c0	-
mtr-miR156h-3p_1ss8AC	comp47966_c0	comp47966_c0	sp|Q9BTV6|WDR85_HUMAN WD repeat-containing protein 85 OS=Homo sapiens GN=WDR85 PE=2 SV=2	GO:0017183(peptidyl-diphthamide biosynthetic process from peptidyl-histidine)
mtr-miR156h-3p_1ss8AC	comp452_c0	comp452_c0	sp|O80970|NPY2_ARATH BTB/POZ domain-containing protein NPY2 OS=Arabidopsis thaliana GN=NPY2 PE=2 SV=1	GO:0071944(cell periphery);GO:0004871(signal transducer activity);GO:0009416(response to light stimulus)
mtr-miR156h-3p_1ss8AC	comp49097_c0	comp49097_c0	-		ko00910(Nitrogen metabolism)
mtr-miR156h-3p_1ss8AC	comp17747_c0	comp17747_c0	-
mtr-miR156h-3p_1ss8AC	comp64243_c0	comp64243_c0	-
mtr-miR156h-3p_1ss8AC	comp37943_c0	comp37943_c0	sp|D4Q9Z4|SGT2_SOYBN Soyasapogenol B glucuronide galactosyltransferase OS=Glycine max GN=GmSGT2 PE=1 SV=1
mtr-miR156h-3p_1ss8AC	comp283869_c0	comp283869_c0	sp|Q9LV16|B3GTJ_ARATH Probable beta-1,3-galactosyltransferase 19 OS=Arabidopsis thaliana GN=B3GALT19 PE=2 SV=2	GO:0009507(chloroplast);GO:0000139(Golgi membrane);GO:0016021(integral to membrane);GO:0008378(galactosyltransferase activity);GO:0005529(sugar binding);GO:0006486(protein glycosylation)
mtr-miR156h-3p_1ss8AC	comp57815_c0	comp57815_c0	-
mtr-miR156h-3p_1ss8AC	comp67794_c0	comp67794_c0	sp|Q9SD39|PMTR_ARATH Probable methyltransferase PMT27 OS=Arabidopsis thaliana GN=At3g51070 PE=3 SV=1	GO:0005789(endoplasmic reticulum membrane);GO:0016021(integral to membrane);GO:0008168(methyltransferase activity)	ko03040(Spliceosome)
mtr-miR156h-3p_1ss8AC	comp38160_c0	comp38160_c0	sp|O24454|UBP3_ARATH Ubiquitin carboxyl-terminal hydrolase 3 OS=Arabidopsis thaliana GN=UBP3 PE=1 SV=1	GO:0005634(nucleus);GO:0008234(cysteine-type peptidase activity);GO:0004221(ubiquitin thiolesterase activity);GO:0006511(ubiquitin-dependent protein catabolic process)
mtr-miR156h-3p_1ss8AC	comp47403_c0	comp47403_c0	sp|O22969|Y2416_ARATH Uncharacterized protein At2g34160 OS=Arabidopsis thaliana GN=At2g34160 PE=1 SV=1	GO:0005829(cytosol);GO:0003676(nucleic acid binding)
mtr-miR156h-3p_1ss8AC	comp49666_c0	comp49666_c0	sp|Q9SRT0|PUB9_ARATH U-box domain-containing protein 9 OS=Arabidopsis thaliana GN=PUB9 PE=1 SV=1	GO:0005634(nucleus);GO:0005886(plasma membrane);GO:0000151(ubiquitin ligase complex);GO:0070696(transmembrane receptor protein serine/threonine kinase binding);GO:0004842(ubiquitin-protein ligase activity);GO:0009738(abscisic acid mediated signaling pathway)
mtr-miR156h-3p_1ss8AC	comp270040_c0	comp270040_c0	-
mtr-miR156h-3p_1ss8AC	comp53984_c0	comp53984_c0	-
mtr-miR156h-3p_1ss8AC	comp67347_c0	comp67347_c0	sp|Q9AV97|KDSA1_ARATH 2-dehydro-3-deoxyphosphooctonate aldolase 1 OS=Arabidopsis thaliana GN=KDSA1 PE=1 SV=2	GO:0005829(cytosol);GO:0008676(3-deoxy-8-phosphooctulonate synthase activity);GO:0010306(rhamnogalacturonan II biosynthetic process)	ko00540(Lipopolysaccharide biosynthesis)
mtr-miR156h-3p_1ss8AC	comp56839_c0	comp56839_c0	-
mtr-miR156h-3p_1ss8AC	comp54188_c0	comp54188_c0	-
mtr-miR156h-3p_1ss8AC	comp32406_c0	comp32406_c0	-
mtr-miR156h-3p_1ss8AC	comp61385_c0	comp61385_c0	-
mtr-miR156h-3p_1ss8AC	comp52859_c0	comp52859_c0	-
mtr-miR156h-3p_1ss8AC	comp60871_c0	comp60871_c0	sp|Q84JC0|RRP8_ARATH Ribosomal RNA-processing protein 8 OS=Arabidopsis thaliana GN=At5g40530 PE=2 SV=1	GO:0005677(chromatin silencing complex);GO:0005730(nucleolus);GO:0033553(rDNA heterochromatin);GO:0035064(methylated histone residue binding);GO:0008168(methyltransferase activity);GO:0016568(chromatin modification);GO:0000183(chromatin silencing at rDNA);GO:0006364(rRNA processing);GO:0006351(transcription, DNA-dependent)
mtr-miR156h-3p_1ss8AC	comp57710_c0	comp57710_c0	sp|Q2LZZ7|TRC_DROPS Serine/threonine-protein kinase tricorner OS=Drosophila pseudoobscura pseudoobscura GN=trc PE=3 SV=1	GO:0005737(cytoplasm);GO:0005634(nucleus);GO:0005524(ATP binding);GO:0046872(metal ion binding);GO:0004674(protein serine/threonine kinase activity);GO:0007243(intracellular protein kinase cascade);GO:0050773(regulation of dendrite development)
mtr-miR156h-3p_1ss8AC	comp19215_c0	comp19215_c0	sp|Q28CY2|EIF3G_XENTR Eukaryotic translation initiation factor 3 subunit G OS=Xenopus tropicalis GN=eif3g PE=2 SV=1	GO:0005852(eukaryotic translation initiation factor 3 complex);GO:0000166(nucleotide binding);GO:0003743(translation initiation factor activity)
mtr-miR156h-3p_1ss8AC	comp60312_c0	comp60312_c0	-
mtr-miR156h-3p_1ss8AC	comp28390_c0	comp28390_c0	-
mtr-miR156h-3p_1ss8AC	comp58322_c0	comp58322_c0	-
mtr-miR156h-3p_1ss8AC	comp55795_c0	comp55795_c0	-
mtr-miR156h-3p_1ss8AC	comp53132_c0	comp53132_c0	-
mtr-miR156h-3p_1ss8AC	comp60322_c0	comp60322_c0	sp|O65554|CIPK6_ARATH CBL-interacting serine/threonine-protein kinase 6 OS=Arabidopsis thaliana GN=CIPK6 PE=1 SV=1	GO:0005524(ATP binding);GO:0005515(protein binding);GO:0004674(protein serine/threonine kinase activity);GO:0010540(basipetal auxin transport);GO:0042538(hyperosmotic salinity response);GO:0007275(multicellular organismal development);GO:0009414(response to water deprivation);GO:0007165(signal transduction)
mtr-miR156h-3p_1ss8AC	comp62302_c0	comp62302_c0	-
mtr-miR156h-3p_1ss8AC	comp62846_c0	comp62846_c0	sp|Q8RYJ9|CML23_ORYSJ Putative calcium-binding protein CML23 OS=Oryza sativa subsp. japonica GN=CML23 PE=3 SV=1	GO:0005509(calcium ion binding)
mtr-miR156h-3p_1ss8AC	comp57052_c0	comp57052_c0	-
mtr-miR156h-3p_1ss8AC	comp477145_c0	comp477145_c0	-
mtr-miR156h-3p_1ss8AC	comp64305_c0	comp64305_c0	sp|P0CB26|Y1089_ARATH Uncharacterized protein At1g10890 OS=Arabidopsis thaliana GN=At1g10890 PE=1 SV=1
mtr-miR156h-3p_1ss8AC	comp55224_c0	comp55224_c0	-
mtr-miR156h-3p_1ss8AC	comp59095_c0	comp59095_c0	sp|Q941L0|CESA3_ARATH Cellulose synthase A catalytic subunit 3 [UDP-forming] OS=Arabidopsis thaliana GN=CESA3 PE=1 SV=2	GO:0005794(Golgi apparatus);GO:0016021(integral to membrane);GO:0005886(plasma membrane);GO:0009506(plasmodesma);GO:0016760(cellulose synthase );GO:0008270(zinc ion binding);GO:0007047(cellular cell wall organization);GO:0030244(cellulose biosynthetic process);GO:0006952(defense response);GO:0009833(primary cell wall biogenesis)
mtr-miR156h-3p_1ss8AC	comp7158_c0	comp7158_c0	-
mtr-miR156h-3p_1ss8AC	comp59136_c0	comp59136_c0	sp|Q8BUV8|GP107_MOUSE Protein GPR107 OS=Mus musculus GN=Gpr107 PE=2 SV=2	GO:0016021(integral to membrane)
mtr-miR156h-3p_1ss8AC	comp387102_c0	comp387102_c0	-
mtr-miR156h-3p_1ss8AC	comp298753_c0	comp298753_c0	-
mtr-miR156h-3p_1ss8AC	comp216375_c0	comp216375_c0	-
mtr-miR156h-3p_1ss8AC	comp878126_c0	comp878126_c0	-
mtr-miR156h-3p_1ss8AC	comp863693_c0	comp863693_c0	-
mtr-miR156h-3p_1ss8AC	comp27892_c0	comp27892_c0	-
mtr-miR156h-3p_1ss8AC	comp388642_c0	comp388642_c0	-
mtr-miR156h-3p_1ss8AC	comp53293_c0	comp53293_c0	-
mtr-miR156h-3p_1ss8AC	comp68522_c0	comp68522_c0	-
mtr-miR156h-3p_1ss8AC	comp61387_c0	comp61387_c0	sp|Q9SZ67|WRK19_ARATH Probable WRKY transcription factor 19 OS=Arabidopsis thaliana GN=WRKY19 PE=2 SV=1	GO:0009941(chloroplast envelope);GO:0031224(intrinsic to membrane);GO:0005634(nucleus);GO:0005524(ATP binding);GO:0017111(nucleoside-triphosphatase activity);GO:0005515(protein binding);GO:0004674(protein serine/threonine kinase activity);GO:0043565(sequence-specific DNA binding);GO:0003700(sequence-specific DNA binding transcription factor activity);GO:0004888(transmembrane signaling receptor ac…
mtr-miR156h-3p_1ss8AC	comp765111_c0	comp765111_c0	-
mtr-miR156h-3p_1ss8AC	comp66933_c0	comp66933_c0	sp|Q0JHZ2|C3H11_ORYSJ Zinc finger CCCH domain-containing protein 11 OS=Oryza sativa subsp. japonica GN=Os01g0834700 PE=2 SV=2	GO:0003677(DNA binding);GO:0008270(zinc ion binding)
mtr-miR156h-3p_1ss8AC	comp68097_c0	comp68097_c0	sp|Q7DM58|AB4C_ARATH ABC transporter C family member 4 OS=Arabidopsis thaliana GN=ABCC4 PE=1 SV=2	GO:0016021(integral to membrane);GO:0000325(plant-type vacuole);GO:0005886(plasma membrane);GO:0009506(plasmodesma);GO:0005774(vacuolar membrane);GO:0005524(ATP binding);GO:0008517(folic acid transporter activity);GO:0008559(xenobiotic-transporting ATPase activity);GO:0009624(response to nematode);GO:0009414(response to water deprivation);GO:0009611(response to wounding);GO:0010118(stomatal movem…	ko02010(ABC transporters)
mtr-miR156h-3p_1ss8AC	comp66360_c0	comp66360_c0	sp|Q8VYU6|GOGC4_ARATH Golgin candidate 4 OS=Arabidopsis thaliana GN=GC4 PE=2 SV=1	GO:0005794(Golgi apparatus)
mtr-miR156h-3p_1ss8AC	comp27381_c0	comp27381_c0	sp|Q8GYA4|CRK10_ARATH Cysteine-rich receptor-like protein kinase 10 OS=Arabidopsis thaliana GN=CRK10 PE=1 SV=3	GO:0016021(integral to membrane);GO:0005886(plasma membrane);GO:0005524(ATP binding);GO:0004674(protein serine/threonine kinase activity);GO:0004872(receptor activity)	ko00270(Cysteine and methionine metabolism)
mtr-miR156h-3p_1ss8AC	comp56878_c0	comp56878_c0	-
mtr-miR156h-3p_1ss8AC	comp40836_c0	comp40836_c0	sp|O80482|BH149_ARATH Transcription factor bHLH149 OS=Arabidopsis thaliana GN=BHLH149 PE=1 SV=1	GO:0005634(nucleus);GO:0003677(DNA binding);GO:0006355(regulation of transcription, DNA-dependent);GO:0006351(transcription, DNA-dependent)
mtr-miR156h-3p_1ss8AC	comp54586_c0	comp54586_c0	-
mtr-miR156h-3p_1ss8AC	comp13790_c0	comp13790_c0	-
mtr-miR156h-3p_1ss8AC	comp767885_c0	comp767885_c0	-
mtr-miR156h-3p_1ss8AC	comp63459_c0	comp63459_c0	-
mtr-miR156h-3p_1ss8AC	comp55981_c0	comp55981_c0	sp|Q9ZUY1|PP173_ARATH Pentatricopeptide repeat-containing protein At2g27800, mitochondrial OS=Arabidopsis thaliana GN=At2g27800 PE=2 SV=2	GO:0005739(mitochondrion)
mtr-miR156h-3p_1ss8AC	comp68510_c0	comp68510_c0	sp|Q9SHY2|YSL7_ARATH Probable metal-nicotianamine transporter YSL7 OS=Arabidopsis thaliana GN=YSL7 PE=2 SV=1	GO:0016021(integral to membrane);GO:0005886(plasma membrane);GO:0055085(transmembrane transport)
mtr-miR156h-3p_1ss8AC	comp58820_c0	comp58820_c0	sp|O81769|DPH5_ARATH Probable diphthine synthase OS=Arabidopsis thaliana GN=At4g31790 PE=2 SV=1	GO:0004164(diphthine synthase activity);GO:0017183(peptidyl-diphthamide biosynthetic process from peptidyl-histidine)
mtr-miR156h-3p_1ss8AC	comp63991_c0	comp63991_c0	-
mtr-miR156h-3p_1ss8AC	comp59593_c0	comp59593_c0	sp|P50580|PA2G4_MOUSE Proliferation-associated protein 2G4 OS=Mus musculus GN=Pa2g4 PE=1 SV=3	GO:0005737(cytoplasm);GO:0005730(nucleolus);GO:0030529(ribonucleoprotein complex);GO:0003723(RNA binding);GO:0006417(regulation of translation);GO:0006364(rRNA processing)
mtr-miR156h-3p_1ss8AC	comp628927_c0	comp628927_c0	-
mtr-miR156h-3p_1ss8AC	comp51741_c0	comp51741_c0	sp|P26863|RT01_MARPO Ribosomal protein S1, mitochondrial OS=Marchantia polymorpha GN=RPS1 PE=3 SV=2	GO:0005739(mitochondrion);GO:0005840(ribosome);GO:0003723(RNA binding);GO:0003735(structural constituent of ribosome);GO:0006412(translation)
mtr-miR156h-3p_1ss8AC	comp37147_c0	comp37147_c0	-
mtr-miR156h-3p_1ss8AC	comp53056_c0	comp53056_c0	sp|Q9LDQ3|CRK35_ARATH Putative cysteine-rich receptor-like protein kinase 35 OS=Arabidopsis thaliana GN=CRK35 PE=3 SV=3	GO:0016021(integral to membrane);GO:0005524(ATP binding);GO:0004674(protein serine/threonine kinase activity);GO:0004872(receptor activity)
mtr-miR156h-3p_1ss8AC	comp49969_c0	comp49969_c0	sp|Q9FF77|PME47_ARATH Probable pectinesterase/pectinesterase inhibitor 47 OS=Arabidopsis thaliana GN=PME47 PE=2 SV=1	GO:0005618(cell wall);GO:0005576(extracellular region);GO:0045330(aspartyl esterase activity);GO:0004857(enzyme inhibitor activity);GO:0030599(pectinesterase activity);GO:0042545(cell wall modification);GO:0007047(cellular cell wall organization)	ko00040(Pentose and glucuronate interconversions);ko00500(Starch and sucrose metabolism)
mtr-miR156h-3p_1ss8AC	comp26770_c0	comp26770_c0	-
mtr-miR156h-3p_1ss8AC	comp56734_c0	comp56734_c0	sp|Q9C884|PMTI_ARATH Probable methyltransferase PMT18 OS=Arabidopsis thaliana GN=At1g33170 PE=2 SV=1	GO:0005789(endoplasmic reticulum membrane);GO:0016021(integral to membrane);GO:0008168(methyltransferase activity)
mtr-miR156h-3p_1ss8AC	comp136857_c0	comp136857_c0	-
mtr-miR156h-3p_1ss8AC	comp84340_c0	comp84340_c0	-
mtr-miR156h-3p_1ss8AC	comp49802_c0	comp49802_c0	-
mtr-miR156h-3p_1ss8AC	comp65991_c0	comp65991_c0	sp|O48946|CESA1_ARATH Cellulose synthase A catalytic subunit 1 [UDP-forming] OS=Arabidopsis thaliana GN=CESA1 PE=1 SV=1	GO:0005794(Golgi apparatus);GO:0016021(integral to membrane);GO:0005886(plasma membrane);GO:0016760(cellulose synthase );GO:0008270(zinc ion binding);GO:0007047(cellular cell wall organization);GO:0030244(cellulose biosynthetic process);GO:0042538(hyperosmotic salinity response);GO:0009833(primary cell wall biogenesis)
mtr-miR156h-3p_1ss8AC	comp67277_c0	comp67277_c0	-
mtr-miR156h-3p_1ss8AC	comp67301_c0	comp67301_c0	-
mtr-miR156h-3p_1ss8AC	comp616796_c0	comp616796_c0	-
mtr-miR156h-3p_1ss8AC	comp68171_c0	comp68171_c0	-
mtr-miR156h-3p_1ss8AC	comp50546_c0	comp50546_c0	sp|Q9SAJ7|MTP9_ARATH Metal tolerance protein 9 OS=Arabidopsis thaliana GN=MTP9 PE=2 SV=2	GO:0016021(integral to membrane);GO:0005886(plasma membrane);GO:0005774(vacuolar membrane);GO:0008324(cation transmembrane transporter activity)
mtr-miR156h-3p_1ss8AC	comp68335_c0	comp68335_c0	sp|Q0WSY2|FPP4_ARATH Filament-like plant protein 4 OS=Arabidopsis thaliana GN=FPP4 PE=2 SV=1	GO:0005886(plasma membrane)
mtr-miR156h-3p_1ss8AC	comp51512_c0	comp51512_c0	-
mtr-miR156h-3p_1ss8AC	comp258290_c0	comp258290_c0	-
mtr-miR156h-3p_1ss8AC	comp59915_c0	comp59915_c0	-
mtr-miR156h-3p_1ss8AC	comp66990_c0	comp66990_c0	sp|Q9LV48|PERK1_ARATH Proline-rich receptor-like protein kinase PERK1 OS=Arabidopsis thaliana GN=PERK1 PE=1 SV=1	GO:0016021(integral to membrane);GO:0005886(plasma membrane);GO:0005524(ATP binding);GO:0004674(protein serine/threonine kinase activity);GO:0046777(protein autophosphorylation)
mtr-miR156h-3p_1ss8AC	comp66872_c0	comp66872_c0	sp|O82188|RDR5_ARATH Probable RNA-dependent RNA polymerase 5 OS=Arabidopsis thaliana GN=RDR5 PE=2 SV=2	GO:0003723(RNA binding);GO:0003968(RNA-directed RNA polymerase activity);GO:0031047(gene silencing by RNA)
mtr-miR156h-3p_1ss8AC	comp59060_c0	comp59060_c0	sp|Q9FZ45|Y1686_ARATH Uncharacterized membrane protein At1g16860 OS=Arabidopsis thaliana GN=At1g16860 PE=1 SV=1	GO:0016021(integral to membrane);GO:0005886(plasma membrane)
mtr-miR156h-3p_1ss8AC	comp66048_c0	comp66048_c0	sp|Q9LFA2|KIPK_ARATH Serine/threonine-protein kinase KIPK OS=Arabidopsis thaliana GN=KIPK PE=1 SV=1	GO:0005737(cytoplasm);GO:0005634(nucleus);GO:0005524(ATP binding);GO:0005515(protein binding);GO:0004674(protein serine/threonine kinase activity)
mtr-miR156h-3p_1ss8AC	comp66569_c0	comp66569_c0	sp|O65154|KIWI_ARATH RNA polymerase II transcriptional coactivator KIWI OS=Arabidopsis thaliana GN=KIWI PE=1 SV=1	GO:0005634(nucleus);GO:0003677(DNA binding);GO:0005515(protein binding);GO:0003713(transcription coactivator activity);GO:0006355(regulation of transcription, DNA-dependent);GO:0006351(transcription, DNA-dependent)
mtr-miR156h-3p_1ss8AC	comp41598_c0	comp41598_c0	sp|Q6NQ88|DDB2_ARATH Protein DAMAGED DNA-BINDING 2 OS=Arabidopsis thaliana GN=DDB2 PE=1 SV=1	GO:0005634(nucleus);GO:0003677(DNA binding);GO:0008270(zinc ion binding);GO:0006281(DNA repair);GO:0010224(response to UV-B)	ko03420(Nucleotide excision repair);ko04115(p53 signaling pathway);ko04120(Ubiquitin mediated proteolysis)
mtr-miR156h-3p_1ss8AC	comp64865_c0	comp64865_c0	sp|P93092|ACP1_CASGL Acyl carrier protein 1, chloroplastic OS=Casuarina glauca GN=ACP1 PE=2 SV=1	GO:0009507(chloroplast);GO:0000036(acyl carrier activity);GO:0048037(cofactor binding);GO:0031177(phosphopantetheine binding);GO:0006633(fatty acid biosynthetic process)	ko00190(Oxidative phosphorylation)
mtr-miR156h-3p_1ss8AC	comp63278_c0	comp63278_c0	sp|O64654|TRL11_ARATH Thioredoxin-like 1-1, chloroplastic OS=Arabidopsis thaliana GN=At1g08570 PE=2 SV=1	GO:0031969(chloroplast membrane);GO:0009570(chloroplast stroma);GO:0009055(electron carrier activity);GO:0016671(oxidoreductase activity, acting on a sulfur group of donors, disulfide as acceptor);GO:0015035(protein disulfide oxidoreductase activity);GO:0045454(cell redox homeostasis);GO:0022900(electron transport chain);GO:0006662(glycerol ether metabolic process);GO:0006810(transport)
mtr-miR156h-3p_1ss8AC	comp55457_c0	comp55457_c0	sp|P32793|YSC84_YEAST Protein YSC84 OS=Saccharomyces cerevisiae (strain ATCC 204508 / S288c) GN=YSC84 PE=1 SV=2	GO:0030479(actin cortical patch);GO:0051015(actin filament binding);GO:0051666(actin cortical patch localization);GO:0051017(actin filament bundle assembly);GO:0006897(endocytosis)
mtr-miR156h-3p_1ss8AC	comp60875_c1	comp60875_c1	-
mtr-miR156h-3p_1ss8AC	comp62593_c0	comp62593_c0	sp|P48620|FAD3C_SESIN Omega-3 fatty acid desaturase, chloroplastic OS=Sesamum indicum GN=FAD7 PE=2 SV=1	GO:0031969(chloroplast membrane);GO:0016717(oxidoreductase activity, acting on paired donors, with oxidation of a pair of donors resulting in the reduction of molecular oxygen to two molecules of water);GO:0006633(fatty acid biosynthetic process)	ko01040(Biosynthesis of unsaturated fatty acids)
mtr-miR156h-3p_1ss8AC	comp443515_c0	comp443515_c0	-
mtr-miR156h-3p_1ss8AC	comp570245_c0	comp570245_c0	sp|O22137|PP202_ARATH Pentatricopeptide repeat-containing protein At2g45350, chloroplastic OS=Arabidopsis thaliana GN=CRR4 PE=3 SV=2	GO:0009507(chloroplast);GO:0005773(vacuole);GO:0003723(RNA binding);GO:0016556(mRNA modification);GO:0006397(mRNA processing)
mtr-miR156h-3p_1ss8AC	comp43792_c0	comp43792_c0	-
mtr-miR156h-3p_1ss8AC	comp64534_c0	comp64534_c0	-
mtr-miR156h-3p_1ss8AC	comp59593_c0	comp59593_c0	sp|P50580|PA2G4_MOUSE Proliferation-associated protein 2G4 OS=Mus musculus GN=Pa2g4 PE=1 SV=3	GO:0005737(cytoplasm);GO:0005730(nucleolus);GO:0030529(ribonucleoprotein complex);GO:0003723(RNA binding);GO:0006417(regulation of translation);GO:0006364(rRNA processing)
mtr-miR156h-3p_1ss8AC	comp49500_c0	comp49500_c0	-
mtr-miR156h-3p_1ss8AC	comp66569_c0	comp66569_c0	sp|O65154|KIWI_ARATH RNA polymerase II transcriptional coactivator KIWI OS=Arabidopsis thaliana GN=KIWI PE=1 SV=1	GO:0005634(nucleus);GO:0003677(DNA binding);GO:0005515(protein binding);GO:0003713(transcription coactivator activity);GO:0006355(regulation of transcription, DNA-dependent);GO:0006351(transcription, DNA-dependent)
mtr-miR156h-3p_1ss8AC	comp60433_c0	comp60433_c0	sp|Q9LSE2|ICE1_ARATH Transcription factor ICE1 OS=Arabidopsis thaliana GN=SCRM PE=1 SV=1	GO:0005634(nucleus);GO:0003677(DNA binding);GO:0045893(positive regulation of transcription, DNA-dependent);GO:0050826(response to freezing);GO:0010440(stomatal lineage progression);GO:0006351(transcription, DNA-dependent)
mtr-miR156h-3p_1ss8AC	comp14571_c0	comp14571_c0	-
mtr-miR156h-3p_1ss8AC	comp27812_c0	comp27812_c0	-
mtr-miR156h-3p_1ss8AC	comp65043_c0	comp65043_c0	sp|A8R7E6|CERK1_ARATH Chitin elicitor receptor kinase 1 OS=Arabidopsis thaliana GN=CERK1 PE=1 SV=1
mtr-miR156h-3p_1ss8AC	comp488680_c0	comp488680_c0	-
mtr-miR156h-3p_1ss8AC	comp52667_c0	comp52667_c0	sp|Q9AWA5|GWD1_SOLTU Alpha-glucan water dikinase, chloroplastic OS=Solanum tuberosum GN=R1 PE=1 SV=2	GO:0009507(chloroplast);GO:0050521(alpha-glucan, water dikinase activity);GO:0005524(ATP binding);GO:0016874(ligase activity);GO:0046872(metal ion binding);GO:0004673(protein histidine kinase activity);GO:0005975(carbohydrate metabolic process)
mtr-miR156h-3p_1ss8AC	comp53061_c0	comp53061_c0	-
mtr-miR156h-3p_1ss8AC	comp14662_c0	comp14662_c0	-
mtr-miR156h-3p_1ss8AC	comp58930_c0	comp58930_c0	-
mtr-miR156h-3p_1ss8AC	comp464224_c0	comp464224_c0	-
mtr-miR156h-3p_1ss8AC	comp68556_c0	comp68556_c0	sp|P31434|XYLS_ECOLI Alpha-xylosidase OS=Escherichia coli (strain K12) GN=yicI PE=1 SV=2	GO:0030246(carbohydrate binding);GO:0004553(hydrolase activity, hydrolyzing O-glycosyl compounds);GO:0005975(carbohydrate metabolic process)	ko03440(Homologous recombination)
mtr-miR156h-3p_1ss8AC	comp68551_c0	comp68551_c0	sp|P0A9Q8|ADHE_ECO57 Aldehyde-alcohol dehydrogenase OS=Escherichia coli O157:H7 GN=adhE PE=3 SV=2	GO:0008774(acetaldehyde dehydrogenase );GO:0004022(alcohol dehydrogenase );GO:0046872(metal ion binding);GO:0006066(alcohol metabolic process);GO:0015976(carbon utilization)	ko04626(Plant-pathogen interaction)
mtr-miR156h-3p_1ss8AC	comp68538_c0	comp68538_c0	sp|P33345|MOLR_ECOLI Putative molybdate metabolism regulator OS=Escherichia coli (strain K12) GN=yehH PE=5 SV=1	GO:0016788(hydrolase activity, acting on ester bonds);GO:0006974(response to DNA damage stimulus)
mtr-miR156h-3p_1ss8AC	comp654264_c0	comp654264_c0	-
mtr-miR156h-3p_1ss8AC	comp2775_c0	comp2775_c0	-
mtr-miR156h-3p_1ss8AC	comp265_c0	comp265_c0	-
mtr-miR156h-3p_1ss8AC	comp40534_c1	comp40534_c1	sp|Q9M353|CHX20_ARATH Cation/H(+) antiporter 20 OS=Arabidopsis thaliana GN=CHX20 PE=2 SV=1	GO:0012505(endomembrane system);GO:0016021(integral to membrane);GO:0015299(solute:hydrogen antiporter activity);GO:0030007(cellular potassium ion homeostasis);GO:0006813(potassium ion transport);GO:0030104(water homeostasis)
mtr-miR156h-3p_1ss8AC	comp68300_c0	comp68300_c0	sp|B1IW07|MUKB_ECOLC Chromosome partition protein MukB OS=Escherichia coli (strain ATCC 8739 / DSM 1576 / Crooks) GN=mukB PE=3 SV=1	GO:0005737(cytoplasm);GO:0009295(nucleoid);GO:0005524(ATP binding);GO:0003677(DNA binding);GO:0007049(cell cycle);GO:0051301(cell division);GO:0030261(chromosome condensation);GO:0007059(chromosome segregation)	ko00620(Pyruvate metabolism);ko00640(Propanoate metabolism);ko00650(Butanoate metabolism)
mtr-miR156h-3p_1ss8AC	comp689093_c0	comp689093_c0	-
mtr-miR156h-3p_1ss8AC	comp2392_c0	comp2392_c0	sp|P10978|POLX_TOBAC Retrovirus-related Pol polyprotein from transposon TNT 1-94 OS=Nicotiana tabacum PE=2 SV=1	GO:0004190(aspartic-type endopeptidase activity);GO:0003677(DNA binding);GO:0004519(endonuclease activity);GO:0003964(RNA-directed DNA polymerase activity);GO:0008270(zinc ion binding);GO:0015074(DNA integration)
mtr-miR156h-3p_1ss8AC	comp67101_c0	comp67101_c0	sp|P76129|DOSP_ECOLI Oxygen sensor protein DosP OS=Escherichia coli (strain K12) GN=dosP PE=1 SV=4	GO:0071111(cyclic-guanylate-specific phosphodiesterase activity);GO:0020037(heme binding);GO:0000287(magnesium ion binding);GO:0016849(phosphorus-oxygen lyase activity);GO:0000155(two-component sensor activity);GO:0009190(cyclic nucleotide biosynthetic process);GO:0035556(intracellular signal transduction);GO:0006355(regulation of transcription, DNA-dependent)	ko00620(Pyruvate metabolism);ko00710(Carbon fixation in photosynthetic organisms)
mtr-miR156h-3p_1ss8AC	comp498572_c0	comp498572_c0	sp|Q940A6|PP325_ARATH Pentatricopeptide repeat-containing protein At4g19440, chloroplastic OS=Arabidopsis thaliana GN=At4g19440 PE=2 SV=2	GO:0009507(chloroplast);GO:0005488(binding)
mtr-miR156h-3p_1ss8AC	comp42546_c0	comp42546_c0	-
mtr-miR156h-3p_1ss8AC	comp47697_c0	comp47697_c0	-
mtr-miR156h-3p_1ss8AC	comp49229_c0	comp49229_c0	sp|Q8GUL1|AT18G_ARATH Autophagy-related protein 18g OS=Arabidopsis thaliana GN=ATG18G PE=2 SV=1
mtr-miR156h-3p_1ss8AC	comp455106_c0	comp455106_c0	-
mtr-miR156h-3p_1ss8AC	comp58014_c0	comp58014_c0	sp|Q3E902|RS212_ARATH 40S ribosomal protein S21-2 OS=Arabidopsis thaliana GN=RPS21C PE=2 SV=2	GO:0022627(cytosolic small ribosomal subunit);GO:0003735(structural constituent of ribosome);GO:0006412(translation)	ko03010(Ribosome)
mtr-miR156h-3p_1ss8AC	comp60863_c0	comp60863_c0	-
mtr-miR156h-3p_1ss8AC	comp231128_c0	comp231128_c0	-
mtr-miR156h-3p_1ss8AC	comp49157_c0	comp49157_c0	-
mtr-miR156h-3p_1ss8AC	comp620398_c0	comp620398_c0	-
mtr-miR156h-3p_1ss8AC	comp52729_c0	comp52729_c0	sp|P08196|PSY1_SOLLC Phytoene synthase 1, chloroplastic OS=Solanum lycopersicum GN=PSY1 PE=1 SV=2	GO:0009507(chloroplast);GO:0016767(geranylgeranyl-diphosphate geranylgeranyltransferase activity);GO:0016117(carotenoid biosynthetic process)	ko00906(Carotenoid biosynthesis)
mtr-miR156h-3p_1ss8AC	comp41830_c0	comp41830_c0	-
mtr-miR156h-3p_1ss8AC	comp67676_c0	comp67676_c0	sp|A7ZQK7|CYSJ_ECO24 Sulfite reductase [NADPH] flavoprotein alpha-component OS=Escherichia coli O139:H28 (strain E24377A / ETEC) GN=cysJ PE=3 SV=1	GO:0050660(flavin adenine dinucleotide binding);GO:0010181(FMN binding);GO:0005506(iron ion binding);GO:0004783(sulfite reductase );GO:0019344(cysteine biosynthetic process);GO:0022900(electron transport chain);GO:0000103(sulfate assimilation);GO:0006810(transport)
mtr-miR156h-3p_1ss8AC	comp57526_c0	comp57526_c0	-
mtr-miR156h-3p_1ss8AC	comp24637_c0	comp24637_c0	-
mtr-miR156h-3p_1ss8AC	comp600115_c0	comp600115_c0	-
mtr-miR156h-3p_1ss8AC	comp280202_c0	comp280202_c0	-
mtr-miR156h-3p_1ss8AC	comp959785_c0	comp959785_c0	-
mtr-miR156h-3p_1ss8AC	comp1194031_c0	comp1194031_c0	-
mtr-miR156h-3p_1ss8AC	comp52241_c0	comp52241_c0	sp|Q8VYK7|ATG8F_ARATH Autophagy-related protein 8f OS=Arabidopsis thaliana GN=ATG8F PE=2 SV=1	GO:0000421(autophagic vacuole membrane);GO:0033110(CVT vesicle membrane);GO:0005874(microtubule);GO:0006914(autophagy);GO:0015031(protein transport)	ko04140(Regulation of autophagy)
mtr-miR156h-3p_1ss8AC	comp395220_c0	comp395220_c0	-
mtr-miR156h-3p_1ss8AC	comp28521_c0	comp28521_c0	sp|Q9XF43|KCS6_ARATH 3-ketoacyl-CoA synthase 6 OS=Arabidopsis thaliana GN=CUT1 PE=1 SV=1	GO:0005783(endoplasmic reticulum);GO:0016021(integral to membrane);GO:0016747(transferase activity, transferring acyl groups other than amino-acyl groups);GO:0009409(response to cold);GO:0009416(response to light stimulus);GO:0009826(unidimensional cell growth);GO:0010025(wax biosynthetic process)
mtr-miR156h-3p_1ss8AC	comp11086_c0	comp11086_c0	-
mtr-miR156h-3p_1ss8AC	comp412168_c0	comp412168_c0	-
mtr-miR156h-3p_1ss8AC	comp14662_c0	comp14662_c0	-
mtr-miR156h-3p_1ss8AC	comp513519_c0	comp513519_c0	sp|Q8GU87|PDR6_ORYSJ Pleiotropic drug resistance protein 6 OS=Oryza sativa subsp. japonica GN=PDR6 PE=2 SV=3	GO:0016021(integral to membrane);GO:0005524(ATP binding);GO:0016887(ATPase activity);GO:0006810(transport)
mtr-miR156h-3p_1ss8AC	comp916955_c0	comp916955_c0	-
mtr-miR156h-3p_1ss8AC	comp488619_c0	comp488619_c0	-
mtr-miR156h-3p_1ss8AC	comp43920_c0	comp43920_c0	-
mtr-miR156h-3p_1ss8AC	comp29623_c0	comp29623_c0	-
mtr-miR156h-3p_1ss8AC	comp64716_c1	comp64716_c1	-
mtr-miR156h-3p_1ss8AC	comp48212_c0	comp48212_c0	-
mtr-miR156h-3p_1ss8AC	comp125350_c0	comp125350_c0	-		ko04115(p53 signaling pathway);ko04120(Ubiquitin mediated proteolysis)
mtr-miR156h-3p_1ss8AC	comp554032_c0	comp554032_c0	-
mtr-miR156h-3p_1ss8AC	comp42246_c0	comp42246_c0	-
mtr-miR156h-3p_1ss8AC	comp34133_c0	comp34133_c0	-
mtr-miR156h-3p_1ss8AC	comp409194_c0	comp409194_c0	-
mtr-miR156h-3p_1ss8AC	comp34850_c0	comp34850_c0	-
mtr-miR156h-3p_1ss8AC	comp286823_c0	comp286823_c0	-
mtr-miR156h-3p_1ss8AC	comp52147_c0	comp52147_c0	sp|Q39202|RLK1_ARATH G-type lectin S-receptor-like serine/threonine-protein kinase RLK1 OS=Arabidopsis thaliana GN=RLK1 PE=2 SV=2	GO:0016021(integral to membrane);GO:0044459(plasma membrane part);GO:0005524(ATP binding);GO:0005516(calmodulin binding);GO:0004674(protein serine/threonine kinase activity);GO:0004872(receptor activity);GO:0005529(sugar binding)
mtr-miR156h-3p_1ss8AC	comp60498_c0	comp60498_c0	-
mtr-miR156h-3p_1ss8AC	comp1041837_c0	comp1041837_c0	-
mtr-miR156h-3p_1ss8AC	comp220471_c0	comp220471_c0	-
mtr-miR156h-3p_1ss8AC	comp42312_c0	comp42312_c0	-
mtr-miR156h-3p_1ss8AC	comp46117_c0	comp46117_c0	-
mtr-miR156h-3p_1ss8AC	comp60337_c0	comp60337_c0	-
mtr-miR156h-3p_1ss8AC	comp18133_c0	comp18133_c0	-
mtr-miR156h-3p_1ss8AC	comp36509_c0	comp36509_c0	-
mtr-miR156h-3p_1ss8AC	comp46230_c0	comp46230_c0	-
mtr-miR156h-3p_1ss8AC	comp354685_c0	comp354685_c0	sp|Q9LH39|PHSD_ARATH Probable polyamine transporter At3g19553 OS=Arabidopsis thaliana GN=At3g19553 PE=3 SV=1
mtr-miR156h-3p_1ss8AC	comp282199_c0	comp282199_c0	-
mtr-miR156h-3p_1ss8AC	comp53006_c0	comp53006_c0	-
mtr-miR156h-3p_1ss8AC	comp1029945_c0	comp1029945_c0	-
mtr-miR156h-3p_1ss8AC	comp52651_c0	comp52651_c0	-
mtr-miR156h-3p_1ss8AC	comp52631_c0	comp52631_c0	sp|Q8GUI6|JMJ14_ARATH Probable lysine-specific demethylase JMJ14 OS=Arabidopsis thaliana GN=JMJ14 PE=1 SV=1	GO:0005654(nucleoplasm);GO:0003677(DNA binding);GO:0032453(histone demethylase activity );GO:0016702(oxidoreductase activity, acting on single donors with incorporation of molecular oxygen, incorporation of two atoms of oxygen);GO:0010216(maintenance of DNA methylation);GO:0009910(negative regulation of flower development);GO:0048573(photoperiodism, flowering);GO:0006355(regulation of transcripti…
mtr-miR156h-3p_1ss8AC	comp47112_c0	comp47112_c0	-
mtr-miR156h-3p_1ss8AC	comp45249_c0	comp45249_c0	-
mtr-miR156h-3p_1ss8AC	comp25713_c0	comp25713_c0	-
mtr-miR156h-3p_1ss8AC	comp287282_c0	comp287282_c0	-
mtr-miR156h-3p_1ss8AC	comp49602_c0	comp49602_c0	-
mtr-miR156h-3p_1ss8AC	comp63402_c0	comp63402_c0	sp|Q9LK03|PERK2_ARATH Proline-rich receptor-like protein kinase PERK2 OS=Arabidopsis thaliana GN=PERK2 PE=2 SV=3	GO:0016021(integral to membrane);GO:0005886(plasma membrane);GO:0005524(ATP binding);GO:0004674(protein serine/threonine kinase activity);GO:0004872(receptor activity)
mtr-miR156h-3p_1ss8AC	comp29510_c0	comp29510_c0	-
mtr-miR156h-3p_1ss8AC	comp350796_c0	comp350796_c0	-
mtr-miR156h-3p_1ss8AC	comp1609_c0	comp1609_c0	sp|Q9LEV3|CBSX3_ARATH CBS domain-containing protein CBSX3, mitochondrial OS=Arabidopsis thaliana GN=CBSX3 PE=1 SV=1	GO:0005739(mitochondrion);GO:0003824(catalytic activity);GO:0050897(cobalt ion binding);GO:0009651(response to salt stress)
mtr-miR156h-3p_1ss8AC	comp55334_c0	comp55334_c0	sp|Q9FG36|TRL31_ARATH Thioredoxin-like 3-1, chloroplastic OS=Arabidopsis thaliana GN=WCRKC1 PE=2 SV=3	GO:0009570(chloroplast stroma);GO:0009055(electron carrier activity);GO:0015035(protein disulfide oxidoreductase activity);GO:0045454(cell redox homeostasis);GO:0022900(electron transport chain);GO:0006662(glycerol ether metabolic process);GO:0006810(transport)
mtr-miR156h-3p_1ss8AC	comp56428_c0	comp56428_c0	-
mtr-miR156h-3p_1ss8AC	comp35544_c0	comp35544_c0	sp|Q8RWZ5|SD25_ARATH G-type lectin S-receptor-like serine/threonine-protein kinase SD2-5 OS=Arabidopsis thaliana GN=SD25 PE=1 SV=1	GO:0016021(integral to membrane);GO:0044459(plasma membrane part);GO:0005524(ATP binding);GO:0005516(calmodulin binding);GO:0004674(protein serine/threonine kinase activity);GO:0004872(receptor activity);GO:0005529(sugar binding);GO:0031625(ubiquitin protein ligase binding);GO:0046777(protein autophosphorylation)
mtr-miR156h-3p_1ss8AC	comp39211_c0	comp39211_c0	-
mtr-miR156h-3p_1ss8AC	comp65707_c0	comp65707_c0	sp|P76417|YEGT_ECOLI Putative nucleoside transporter YegT OS=Escherichia coli (strain K12) GN=yegT PE=1 SV=1	GO:0016021(integral to membrane);GO:0005886(plasma membrane);GO:0005337(nucleoside transmembrane transporter activity)	ko00730(Thiamine metabolism)
mtr-miR156h-3p_1ss8AC	comp46286_c0	comp46286_c0	-
mtr-miR156h-3p_1ss8AC	comp224698_c0	comp224698_c0	-
mtr-miR156h-3p_1ss8AC	comp31991_c0	comp31991_c0	-
mtr-miR156h-3p_1ss8AC	comp215837_c0	comp215837_c0	-
mtr-miR156h-3p_1ss8AC	comp50936_c0	comp50936_c0	-
mtr-miR156h-3p_1ss8AC	comp48100_c1	comp48100_c1	-
mtr-miR156h-3p_1ss8AC	comp46562_c0	comp46562_c0	-
mtr-miR156h-3p_1ss8AC	comp54619_c0	comp54619_c0	-
mtr-miR156h-3p_1ss8AC	comp383586_c0	comp383586_c0	sp|Q9LRQ7|BAHD2_ARATH BAHD acyltransferase At3g29680 OS=Arabidopsis thaliana GN=At3g29680 PE=2 SV=1
mtr-miR156h-3p_1ss8AC	comp549774_c0	comp549774_c0	-
mtr-miR156h-3p_1ss8AC	comp45636_c0	comp45636_c0	-
mtr-miR156h-3p_1ss8AC	comp55757_c0	comp55757_c0	sp|P93788|REMO_SOLTU Remorin OS=Solanum tuberosum PE=1 SV=1	GO:0005886(plasma membrane);GO:0048032(galacturonate binding);GO:0007267(cell-cell signaling);GO:0006810(transport)
mtr-miR156h-3p_1ss8AC	comp432293_c0	comp432293_c0	-
mtr-miR156h-3p_1ss8AC	comp38735_c0	comp38735_c0	sp|Q9ZRE2|RABD1_ARATH Ras-related protein RABD1 OS=Arabidopsis thaliana GN=RABD1 PE=1 SV=1	GO:0005886(plasma membrane);GO:0032588(trans-Golgi network membrane);GO:0005525(GTP binding);GO:0030742(GTP-dependent protein binding);GO:0080115(myosin XI tail binding);GO:0006888(ER to Golgi vesicle-mediated transport);GO:0015031(protein transport);GO:0007264(small GTPase mediated signal transduction)
mtr-miR156h-3p_1ss8AC	comp130472_c0	comp130472_c0	-
mtr-miR156h-3p_1ss8AC	comp47926_c0	comp47926_c0	-
mtr-miR156h-3p_1ss8AC	comp47296_c0	comp47296_c0	-
mtr-miR156h-3p_1ss8AC	comp55145_c0	comp55145_c0	sp|Q2TBV6|CC124_BOVIN Coiled-coil domain-containing protein 124 OS=Bos taurus GN=CCDC124 PE=2 SV=1	GO:0003677(DNA binding)
mtr-miR156h-3p_1ss8AC	comp356063_c0	comp356063_c0	sp|B5X0N6|KEA6_ARATH K(+) efflux antiporter 6 OS=Arabidopsis thaliana GN=KEA6 PE=2 SV=1	GO:0016021(integral to membrane);GO:0015299(solute:hydrogen antiporter activity);GO:0006813(potassium ion transport)
mtr-miR156h-3p_1ss8AC	comp60113_c0	comp60113_c0	sp|Q0JG75|PSB28_ORYSJ Photosystem II reaction center PSB28 protein, chloroplastic OS=Oryza sativa subsp. japonica GN=PSB28 PE=2 SV=2	GO:0009535(chloroplast thylakoid membrane);GO:0009654(oxygen evolving complex);GO:0015979(photosynthesis)	ko00195(Photosynthesis)
mtr-miR156h-3p_1ss8AC	comp54916_c0	comp54916_c0	-
mtr-miR156h-3p_1ss8AC	comp55984_c0	comp55984_c0	-
mtr-miR156h-3p_1ss8AC	comp354414_c0	comp354414_c0	-
mtr-miR156h-3p_1ss8AC	comp62936_c0	comp62936_c0	sp|P00562|AK2H_ECOLI Bifunctional aspartokinase/homoserine dehydrogenase 2 OS=Escherichia coli (strain K12) GN=metL PE=1 SV=3	GO:0004072(aspartate kinase activity);GO:0005524(ATP binding);GO:0004412(homoserine dehydrogenase activity);GO:0050661(NADP binding);GO:0009090(homoserine biosynthetic process);GO:0009089(lysine biosynthetic process via diaminopimelate);GO:0009086(methionine biosynthetic process)	ko00260(Glycine,ko serine and threonine metabolism);ko00270(Cysteine and methionine metabolism);ko00300(Lysine biosynthesis)
mtr-miR156h-3p_1ss8AC	comp35706_c0	comp35706_c0	-
mtr-miR156h-3p_1ss8AC	comp461772_c0	comp461772_c0	-
mtr-miR156h-3p_1ss8AC	comp53654_c0	comp53654_c0	-
mtr-miR156h-3p_1ss8AC	comp37842_c0	comp37842_c0	-
mtr-miR156h-3p_1ss8AC	comp33285_c0	comp33285_c0	-
mtr-miR156h-3p_1ss8AC	comp37333_c0	comp37333_c0	-
mtr-miR156h-3p_1ss8AC	comp34493_c0	comp34493_c0	-
mtr-miR156h-3p_1ss8AC	comp57841_c1	comp57841_c1	-
mtr-miR156h-3p_1ss8AC	comp40602_c0	comp40602_c0	-
mtr-miR156h-3p_1ss8AC	comp48031_c0	comp48031_c0	-
mtr-miR156h-3p_1ss8AC	comp10092_c0	comp10092_c0	-
mtr-miR156h-3p_1ss8AC	comp30252_c0	comp30252_c0	sp|Q9S7Y1|BH030_ARATH Transcription factor bHLH30 OS=Arabidopsis thaliana GN=BHLH30 PE=1 SV=1	GO:0005634(nucleus);GO:0003677(DNA binding);GO:0006355(regulation of transcription, DNA-dependent);GO:0006351(transcription, DNA-dependent)
mtr-miR156h-3p_1ss8AC	comp31526_c0	comp31526_c0	-
mtr-miR156h-3p_1ss8AC	comp42420_c0	comp42420_c0	-
mtr-miR156h-3p_1ss8AC	comp112998_c0	comp112998_c0	-
mtr-miR156h-3p_1ss8AC	comp41817_c0	comp41817_c0	sp|P97629|LCAP_RAT Leucyl-cystinyl aminopeptidase OS=Rattus norvegicus GN=Lnpep PE=1 SV=1	GO:0009986(cell surface);GO:0012505(endomembrane system);GO:0032593(insulin-responsive compartment);GO:0016021(integral to membrane);GO:0005792(microsome);GO:0043025(neuronal cell body);GO:0048471(perinuclear region of cytoplasm);GO:0005886(plasma membrane);GO:0004177(aminopeptidase activity);GO:0001595(angiotensin receptor activity);GO:0008237(metallopeptidase activity);GO:0017046(peptide hormon…
mtr-miR156h-3p_1ss8AC	comp40568_c0	comp40568_c0	-
mtr-miR156h-3p_1ss8AC	comp616069_c0	comp616069_c0	-
mtr-miR156h-3p_1ss8AC	comp46358_c0	comp46358_c0	-
mtr-miR156h-3p_1ss8AC	comp41824_c0	comp41824_c0	-
mtr-miR156h-3p_1ss8AC	comp56969_c0	comp56969_c0	-
mtr-miR156h-3p_1ss8AC	comp66599_c1	comp66599_c1	-
mtr-miR156h-3p_1ss8AC	comp54110_c0	comp54110_c0	-
mtr-miR156h-3p_1ss8AC	comp64197_c0	comp64197_c0	sp|P36683|ACON2_ECOLI Aconitate hydratase 2 OS=Escherichia coli (strain K12) GN=acnB PE=1 SV=3	GO:0047456(2-methylisocitrate dehydratase activity);GO:0051539(4 iron, 4 sulfur cluster binding);GO:0003994(aconitate hydratase activity);GO:0052632(citrate hydro-lyase );GO:0052633(isocitrate hydro-lyase );GO:0046872(metal ion binding);GO:0003730(mRNA 3'-UTR binding);GO:0019629(propionate catabolic process, 2-methylcitrate cycle);GO:0006417(regulation of translation);GO:0006099(tricarboxylic aci…	ko00020(Citrate cycle );ko00630(Glyoxylate and dicarboxylate metabolism);ko00720(Reductive carboxylate cycle )
mtr-miR156h-3p_1ss8AC	comp50760_c0	comp50760_c0	sp|P36444|MAOC_FLAPR NADP-dependent malic enzyme, chloroplastic OS=Flaveria pringlei GN=MODA PE=2 SV=1	GO:0009507(chloroplast);GO:0004473(malate dehydrogenase );GO:0016619(malate dehydrogenase );GO:0046872(metal ion binding);GO:0051287(NAD binding);GO:0006108(malate metabolic process)	ko00620(Pyruvate metabolism);ko00710(Carbon fixation in photosynthetic organisms)
mtr-miR156h-3p_1ss8AC	comp56249_c0	comp56249_c0	sp|Q8RV04|TI141_ARATH Mitochondrial import inner membrane translocase subunit TIM14-1 OS=Arabidopsis thaliana GN=TIM14-1 PE=3 SV=1
mtr-miR156h-3p_1ss8AC	comp11905_c0	comp11905_c0	-
mtr-miR156h-3p_1ss8AC	comp27060_c0	comp27060_c0	sp|Q24JY1|RL23A_BOVIN 60S ribosomal protein L23a OS=Bos taurus GN=RPL23A PE=2 SV=1	GO:0005634(nucleus);GO:0005840(ribosome);GO:0000166(nucleotide binding);GO:0019843(rRNA binding);GO:0003735(structural constituent of ribosome);GO:0006412(translation)	ko03010(Ribosome)
mtr-miR156h-3p_1ss8AC	comp580556_c0	comp580556_c0	-
mtr-miR156h-3p_1ss8AC	comp32602_c0	comp32602_c0	sp|Q9SH30|HMA5_ARATH Putative copper-transporting ATPase HMA5 OS=Arabidopsis thaliana GN=HMA5 PE=3 SV=2	GO:0016021(integral to membrane);GO:0005524(ATP binding);GO:0005507(copper ion binding);GO:0004008(copper-exporting ATPase activity);GO:0006754(ATP biosynthetic process);GO:0010273(detoxification of copper ion)
mtr-miR156h-3p_1ss8AC	comp63486_c0	comp63486_c0	sp|Q8GWK2|AP2L4_ARATH AP2-like ethylene-responsive transcription factor At2g41710 OS=Arabidopsis thaliana GN=At2g41710 PE=2 SV=2	GO:0005634(nucleus);GO:0003677(DNA binding);GO:0003700(sequence-specific DNA binding transcription factor activity);GO:0009873(ethylene mediated signaling pathway)
mtr-miR156h-3p_1ss8AC	comp44731_c0	comp44731_c0	sp|F4JIF5|TCX2_ARATH Protein tesmin/TSO1-like CXC 2 OS=Arabidopsis thaliana GN=TCX2 PE=1 SV=1
mtr-miR156h-3p_1ss8AC	comp65840_c0	comp65840_c0	sp|Q8LPN7|RNG1L_ARATH E3 ubiquitin-protein ligase RING1-like OS=Arabidopsis thaliana GN=At3g19950 PE=2 SV=1	GO:0016874(ligase activity);GO:0008270(zinc ion binding)
mtr-miR156h-3p_1ss8AC	comp41871_c0	comp41871_c0	-
mtr-miR156h-3p_1ss8AC	comp65684_c0	comp65684_c0	sp|O49741|GATA2_ARATH GATA transcription factor 2 OS=Arabidopsis thaliana GN=GATA2 PE=2 SV=1	GO:0005634(nucleus);GO:0043565(sequence-specific DNA binding);GO:0003700(sequence-specific DNA binding transcription factor activity);GO:0008270(zinc ion binding);GO:0045893(positive regulation of transcription, DNA-dependent);GO:0009416(response to light stimulus)
mtr-miR156h-3p_1ss8AC	comp44123_c1	comp44123_c1	-
mtr-miR156h-3p_1ss8AC	comp55566_c0	comp55566_c0	-
mtr-miR156h-3p_1ss8AC	comp64955_c0	comp64955_c0	-		ko04010(MAPK signaling pathway);ko04012(ErbB signaling pathway);ko04062(Chemokine signaling pathway);ko04114(Oocyte meiosis);ko04150(mTOR signaling pathway);ko04270(Vascular smooth muscle contraction);ko04320(Dorso-ventral axis formation);ko04350(TGF-beta signaling pathway);ko04360(Axon guidance);ko04370(VEGF signaling pathway);ko04510(Focal adhesion);ko04520(Adherens junction);ko04540(Gap juncti…
mtr-miR156h-3p_1ss8AC	comp36066_c0	comp36066_c0	-
mtr-miR156h-3p_1ss8AC	comp204190_c0	comp204190_c0	-
mtr-miR156h-3p_1ss8AC	comp67717_c1	comp67717_c1	sp|O64471|MTX_ARATH Mitochondrial outer membrane import complex protein METAXIN OS=Arabidopsis thaliana GN=MTX1 PE=1 SV=1
mtr-miR156h-3p_1ss8AC	comp15896_c0	comp15896_c0	-
mtr-miR156h-3p_1ss8AC	comp57175_c0	comp57175_c0	sp|P75780|FIU_ECOLI Catecholate siderophore receptor Fiu OS=Escherichia coli (strain K12) GN=fiu PE=1 SV=1	GO:0009279(cell outer membrane);GO:0016021(integral to membrane);GO:0005886(plasma membrane);GO:0005506(iron ion binding);GO:0004872(receptor activity);GO:0015343(siderophore transmembrane transporter activity);GO:0042884(microcin transport)
mtr-miR156h-3p_1ss8AC	comp56213_c0	comp56213_c0	sp|Q9ZVJ3|MA655_ARATH 65-kDa microtubule-associated protein 5 OS=Arabidopsis thaliana GN=MAP65-5 PE=1 SV=2	GO:0055028(cortical microtubule);GO:0005634(nucleus);GO:0009524(phragmoplast);GO:0009506(plasmodesma);GO:0009574(preprophase band);GO:0005819(spindle);GO:0008017(microtubule binding);GO:0051301(cell division);GO:0046785(microtubule polymerization);GO:0007067(mitosis)
mtr-miR156h-3p_1ss8AC	comp333216_c0	comp333216_c0	-
mtr-miR156h-3p_1ss8AC	comp50316_c0	comp50316_c0	-
mtr-miR156h-3p_1ss8AC	comp44244_c0	comp44244_c0	-
mtr-miR156h-3p_1ss8AC	comp51861_c0	comp51861_c0	-
mtr-miR156h-3p_1ss8AC	comp55260_c0	comp55260_c0	sp|Q8S9K3|VAR3_ARATH Zinc finger protein VAR3, chloroplastic OS=Arabidopsis thaliana GN=VAR3 PE=1 SV=2	GO:0009570(chloroplast stroma);GO:0005515(protein binding);GO:0008270(zinc ion binding);GO:0009658(chloroplast organization)
mtr-miR156h-3p_1ss8AC	comp38024_c0	comp38024_c0	sp|Q9C6L5|KCS5_ARATH 3-ketoacyl-CoA synthase 5 OS=Arabidopsis thaliana GN=KCS5 PE=1 SV=1	GO:0005783(endoplasmic reticulum);GO:0016021(integral to membrane);GO:0009922(fatty acid elongase activity);GO:0006633(fatty acid biosynthetic process);GO:0048868(pollen tube development);GO:0009409(response to cold);GO:0009416(response to light stimulus)
mtr-miR156h-3p_1ss8AC	comp57406_c0	comp57406_c0	sp|Q9LRT1|Y3804_ARATH Probably inactive leucine-rich repeat receptor-like protein kinase At3g28040 OS=Arabidopsis thaliana GN=At3g28040 PE=2 SV=1	GO:0016021(integral to membrane);GO:0005524(ATP binding);GO:0004672(protein kinase activity);GO:0004872(receptor activity)
mtr-miR156h-3p_1ss8AC	comp54959_c0	comp54959_c0	-
mtr-miR156h-3p_1ss8AC	comp59133_c0	comp59133_c0	-
mtr-miR156h-3p_1ss8AC	comp40440_c0	comp40440_c0	-
mtr-miR156h-3p_1ss8AC	comp33358_c0	comp33358_c0	-
mtr-miR156h-3p_1ss8AC	comp183003_c0	comp183003_c0	-
mtr-miR156h-3p_1ss8AC	comp57117_c0	comp57117_c0	-
mtr-miR156h-3p_1ss8AC	comp221543_c0	comp221543_c0	-
mtr-miR156h-3p_1ss8AC	comp53156_c0	comp53156_c0	-
mtr-miR156h-3p_1ss8AC	comp50678_c0	comp50678_c0	-
mtr-miR156h-3p_1ss8AC	comp361015_c0	comp361015_c0	-
mtr-miR156h-3p_1ss8AC	comp25678_c0	comp25678_c0	sp|Q84T68|EXOS5_ORYSJ Exosome complex exonuclease RRP46 homolog OS=Oryza sativa subsp. japonica GN=RRP46 PE=1 SV=2	GO:0000178(exosome );GO:0005730(nucleolus);GO:0004536(deoxyribonuclease activity);GO:0003690(double-stranded DNA binding);GO:0004527(exonuclease activity);GO:0042802(identical protein binding);GO:0004540(ribonuclease activity);GO:0003727(single-stranded RNA binding);GO:0006364(rRNA processing)
mtr-miR156h-3p_1ss8AC	comp5952_c0	comp5952_c0	sp|P42285|SK2L2_HUMAN Superkiller viralicidic activity 2-like 2 OS=Homo sapiens GN=SKIV2L2 PE=1 SV=3	GO:0071013(catalytic step 2 spliceosome);GO:0005730(nucleolus);GO:0005524(ATP binding);GO:0008026(ATP-dependent helicase activity);GO:0003676(nucleic acid binding);GO:0005515(protein binding);GO:0000460(maturation of 5.8S rRNA);GO:0000398(nuclear mRNA splicing, via spliceosome)
mtr-miR156h-3p_1ss8AC	comp53956_c0	comp53956_c0	-
mtr-miR156h-3p_1ss8AC	comp59970_c0	comp59970_c0	-
mtr-miR156h-3p_1ss8AC	comp19521_c0	comp19521_c0	sp|P0CH30|RING1_GOSHI E3 ubiquitin-protein ligase RING1 OS=Gossypium hirsutum GN=RING1 PE=2 SV=1	GO:0016874(ligase activity);GO:0008270(zinc ion binding)
mtr-miR156h-3p_1ss8AC	comp48213_c0	comp48213_c0	sp|Q6S004|KIF6_DICDI Kinesin-related protein 6 OS=Dictyostelium discoideum GN=kif6 PE=2 SV=1	GO:0005813(centrosome);GO:0005874(microtubule);GO:0005524(ATP binding);GO:0003777(microtubule motor activity);GO:0007018(microtubule-based movement);GO:0006810(transport)
mtr-miR156h-3p_1ss8AC	comp61338_c0	comp61338_c0	-
mtr-miR156h-3p_1ss8AC	comp401685_c0	comp401685_c0	sp|Q9M9E7|U85A4_ARATH UDP-glycosyltransferase 85A4 OS=Arabidopsis thaliana GN=UGT85A4 PE=2 SV=1	GO:0016758(transferase activity, transferring hexosyl groups)
mtr-miR156h-3p_1ss8AC	comp145245_c0	comp145245_c0	-
mtr-miR156h-3p_1ss8AC	comp58769_c0	comp58769_c0	-
mtr-miR156h-3p_1ss8AC	comp35780_c0	comp35780_c0	-
mtr-miR156h-3p_1ss8AC	comp60216_c0	comp60216_c0	-
mtr-miR156h-3p_1ss8AC	comp715113_c0	comp715113_c0	-
mtr-miR156h-3p_1ss8AC	comp63654_c0	comp63654_c0	sp|Q9ZQ96|U73C3_ARATH UDP-glycosyltransferase 73C3 OS=Arabidopsis thaliana GN=UGT73C3 PE=2 SV=1	GO:0016758(transferase activity, transferring hexosyl groups)	ko00940(Phenylpropanoid biosynthesis)
mtr-miR156h-3p_1ss8AC	comp15891_c0	comp15891_c0	-
mtr-miR156h-3p_1ss8AC	comp41359_c0	comp41359_c0	-
mtr-miR156h-3p_1ss8AC	comp59652_c0	comp59652_c0	sp|Q9Y5U8|MPC1_HUMAN Mitochondrial pyruvate carrier 1 OS=Homo sapiens GN=MPC1 PE=1 SV=1	GO:0005739(mitochondrion)
mtr-miR156h-3p_1ss8AC	comp47181_c0	comp47181_c0	-		ko03040(Spliceosome)
mtr-miR156h-3p_1ss8AC	comp54457_c0	comp54457_c0	-
mtr-miR156h-3p_1ss8AC	comp43129_c0	comp43129_c0	sp|O22969|Y2416_ARATH Uncharacterized protein At2g34160 OS=Arabidopsis thaliana GN=At2g34160 PE=1 SV=1	GO:0005829(cytosol);GO:0003676(nucleic acid binding)
mtr-miR156h-3p_1ss8AC	comp51900_c0	comp51900_c0	sp|Q7XA40|RGA3_SOLBU Putative disease resistance protein RGA3 OS=Solanum bulbocastanum GN=RGA3 PE=2 SV=2	GO:0005524(ATP binding);GO:0006915(apoptosis);GO:0006952(defense response)
mtr-miR156h-3p_1ss8AC	comp31224_c0	comp31224_c0	-
mtr-miR156h-3p_1ss8AC	comp54201_c0	comp54201_c0	-
mtr-miR156h-3p_1ss8AC	comp35750_c0	comp35750_c0	sp|Q8VWQ5|WRK50_ARATH Probable WRKY transcription factor 50 OS=Arabidopsis thaliana GN=WRKY50 PE=2 SV=1	GO:0005634(nucleus);GO:0043565(sequence-specific DNA binding);GO:0003700(sequence-specific DNA binding transcription factor activity);GO:0050832(defense response to fungus);GO:0009867(jasmonic acid mediated signaling pathway)
mtr-miR156h-3p_1ss8AC	comp105723_c0	comp105723_c0	-
mtr-miR156h-3p_1ss8AC	comp65343_c0	comp65343_c0	-
mtr-miR156h-3p_1ss8AC	comp35715_c0	comp35715_c0	-
mtr-miR156h-3p_1ss8AC	comp55823_c0	comp55823_c0	-
mtr-miR156h-3p_1ss8AC	comp65198_c0	comp65198_c0	sp|Q9SR06|CLP1_ARATH Protein CLP1 homolog OS=Arabidopsis thaliana GN=CLPS3 PE=1 SV=1
mtr-miR156h-3p_1ss8AC	comp57748_c0	comp57748_c0	-
mtr-miR156h-3p_1ss8AC	comp67238_c0	comp67238_c0	sp|Q9LSC2|Y3589_ARATH PTI1-like tyrosine-protein kinase At3g15890 OS=Arabidopsis thaliana GN=At3g15890 PE=1 SV=1	GO:0005886(plasma membrane);GO:0005524(ATP binding);GO:0004715(non-membrane spanning protein tyrosine kinase activity)
mtr-miR156h-3p_1ss8AC	comp32335_c0	comp32335_c0	-
mtr-miR156h-3p_1ss8AC	comp313331_c0	comp313331_c0	-
mtr-miR156h-3p_1ss8AC	comp62570_c0	comp62570_c0	-
mtr-miR156h-3p_1ss8AC	comp221532_c0	comp221532_c0	-
mtr-miR156h-3p_1ss8AC	comp47438_c0	comp47438_c0	-
mtr-miR156h-3p_1ss8AC	comp58077_c0	comp58077_c0	-
mtr-miR156h-3p_1ss8AC	comp46218_c0	comp46218_c0	-
mtr-miR156h-3p_1ss8AC	comp67914_c0	comp67914_c0	sp|Q8LBL5|PRT1_ARATH E3 ubiquitin-protein ligase PRT1 OS=Arabidopsis thaliana GN=PRT1 PE=2 SV=2	GO:0005737(cytoplasm);GO:0016874(ligase activity);GO:0008270(zinc ion binding)
mtr-miR156h-3p_1ss8AC	comp59957_c0	comp59957_c0	-		ko03450(Non-homologous end-joining)
mtr-miR156h-3p_1ss8AC	comp36599_c0	comp36599_c0	-
mtr-miR156h-3p_1ss8AC	comp61255_c0	comp61255_c0	sp|Q38732|DAG_ANTMA DAG protein, chloroplastic OS=Antirrhinum majus GN=DAG PE=2 SV=1	GO:0009507(chloroplast)
mtr-miR156h-3p_1ss8AC	comp61145_c0	comp61145_c0	sp|P57742|PFD5_ARATH Probable prefoldin subunit 5 OS=Arabidopsis thaliana GN=At5g23290 PE=2 SV=1	GO:0016272(prefoldin complex);GO:0051082(unfolded protein binding);GO:0006457(protein folding)
mtr-miR156h-3p_1ss8AC	comp61349_c0	comp61349_c0	-
mtr-miR156h-3p_1ss8AC	comp47061_c0	comp47061_c0	sp|Q9LK03|PERK2_ARATH Proline-rich receptor-like protein kinase PERK2 OS=Arabidopsis thaliana GN=PERK2 PE=2 SV=3	GO:0016021(integral to membrane);GO:0005886(plasma membrane);GO:0005524(ATP binding);GO:0004674(protein serine/threonine kinase activity);GO:0004872(receptor activity)	ko00290(Valine,ko leucine and isoleucine biosynthesis);ko00970(Aminoacyl-tRNA biosynthesis)
mtr-miR156h-3p_1ss8AC	comp978044_c0	comp978044_c0	-
mtr-miR156h-3p_1ss8AC	comp7121_c0	comp7121_c0	-
mtr-miR156h-3p_1ss8AC	comp171291_c0	comp171291_c0	-
mtr-miR156h-3p_1ss8AC	comp16837_c0	comp16837_c0	-
mtr-miR156h-3p_1ss8AC	comp119405_c0	comp119405_c0	-
mtr-miR156h-3p_1ss8AC	comp888458_c0	comp888458_c0	-
mtr-miR156h-3p_1ss8AC	comp60462_c0	comp60462_c0	sp|Q0WP36|MOT2_ARATH Molybdate transporter 2 OS=Arabidopsis thaliana GN=MOT2 PE=1 SV=2
mtr-miR156h-3p_1ss8AC	comp25417_c0	comp25417_c0	-
mtr-miR156h-3p_1ss8AC	comp63338_c0	comp63338_c0	-
mtr-miR156h-3p_1ss8AC	comp67510_c0	comp67510_c0	sp|P50433|GLYM_SOLTU Serine hydroxymethyltransferase, mitochondrial OS=Solanum tuberosum PE=2 SV=1	GO:0005739(mitochondrion);GO:0004372(glycine hydroxymethyltransferase activity);GO:0030170(pyridoxal phosphate binding);GO:0006544(glycine metabolic process);GO:0006563(L-serine metabolic process);GO:0006730(one-carbon metabolic process)	ko00260(Glycine,ko serine and threonine metabolism);ko00460(Cyanoamino acid metabolism);ko00670(One carbon pool by folate);ko00680(Methane metabolism)
mtr-miR156h-3p_1ss8AC	comp440740_c0	comp440740_c0	-		ko03410(Base excision repair)
mtr-miR156h-3p_1ss8AC	comp60055_c0	comp60055_c0	sp|Q9M651|RAGP2_ARATH RAN GTPase-activating protein 2 OS=Arabidopsis thaliana GN=RANGAP2 PE=1 SV=2	GO:0009507(chloroplast);GO:0005783(endoplasmic reticulum);GO:0031965(nuclear membrane);GO:0009524(phragmoplast);GO:0005819(spindle);GO:0005774(vacuolar membrane);GO:0005096(GTPase activator activity);GO:0006913(nucleocytoplasmic transport);GO:0009651(response to salt stress)
mtr-miR156h-3p_1ss8AC	comp27765_c0	comp27765_c0	-
mtr-miR156h-3p_1ss8AC	comp62340_c0	comp62340_c0	-
mtr-miR156h-3p_1ss8AC	comp52657_c0	comp52657_c0	sp|P59833|UGPI3_ARATH Uncharacterized GPI-anchored protein At5g19250 OS=Arabidopsis thaliana GN=At5g19250 PE=1 SV=1	GO:0046658(anchored to plasma membrane)
mtr-miR156h-3p_1ss8AC	comp53391_c0	comp53391_c0	-
mtr-miR156h-3p_1ss8AC	comp32770_c0	comp32770_c0	-
mtr-miR156h-3p_1ss8AC	comp68560_c0	comp68560_c0	sp|P11369|POL2_MOUSE Retrovirus-related Pol polyprotein LINE-1 OS=Mus musculus GN=Pol PE=1 SV=2	GO:0004519(endonuclease activity);GO:0003723(RNA binding);GO:0003964(RNA-directed DNA polymerase activity);GO:0006278(RNA-dependent DNA replication)
mtr-miR156h-3p_1ss8AC	comp52201_c0	comp52201_c0	-
mtr-miR156h-3p_1ss8AC	comp31110_c0	comp31110_c0	sp|P82538|PPL1_ARATH PsbP-like protein 1, chloroplastic OS=Arabidopsis thaliana GN=PPL1 PE=1 SV=1	GO:0009543(chloroplast thylakoid lumen);GO:0019898(extrinsic to membrane);GO:0009654(oxygen evolving complex);GO:0005509(calcium ion binding);GO:0015979(photosynthesis)	ko00195(Photosynthesis)
mtr-miR156h-3p_1ss8AC	comp634061_c0	comp634061_c0	sp|Q7PC86|AB35G_ARATH ABC transporter G family member 35 OS=Arabidopsis thaliana GN=ABCG35 PE=2 SV=1	GO:0009507(chloroplast);GO:0016021(integral to membrane);GO:0005886(plasma membrane);GO:0005524(ATP binding);GO:0016887(ATPase activity);GO:0006810(transport)
mtr-miR156h-3p_1ss8AC	comp51486_c0	comp51486_c0	-
mtr-miR156h-3p_1ss8AC	comp63561_c0	comp63561_c0	sp|Q1S9I9|H2B1_MEDTR Probable histone H2B.1 OS=Medicago truncatula PE=1 SV=3	GO:0000786(nucleosome);GO:0005634(nucleus);GO:0003677(DNA binding);GO:0006334(nucleosome assembly)
mtr-miR156h-3p_1ss8AC	comp13461_c0	comp13461_c0	-
mtr-miR156h-3p_1ss8AC	comp23698_c0	comp23698_c0	sp|Q1PEH6|AB3A_ARATH ABC transporter A family member 3 OS=Arabidopsis thaliana GN=ABCA3 PE=2 SV=3	GO:0016021(integral to membrane);GO:0005524(ATP binding);GO:0016887(ATPase activity);GO:0006810(transport)
mtr-miR156h-3p_1ss8AC	comp51252_c0	comp51252_c0	-
mtr-miR156h-3p_1ss8AC	comp59743_c0	comp59743_c0	-
mtr-miR156h-3p_1ss8AC	comp66091_c0	comp66091_c0	-
mtr-miR156h-3p_1ss8AC	comp58008_c0	comp58008_c0	sp|Q8L736|SKI11_ARATH F-box/kelch-repeat protein SKIP11 OS=Arabidopsis thaliana GN=SKIP11 PE=1 SV=2	GO:0005634(nucleus)
mtr-miR156h-3p_1ss8AC	comp64040_c0	comp64040_c0	sp|O64982|PRS7_PRUPE 26S protease regulatory subunit 7 OS=Prunus persica GN=RPT1 PE=1 SV=1	GO:0005737(cytoplasm);GO:0005634(nucleus);GO:0000502(proteasome complex);GO:0005524(ATP binding);GO:0017111(nucleoside-triphosphatase activity);GO:0030163(protein catabolic process)	ko03050(Proteasome)
mtr-miR156h-3p_1ss8AC	comp62708_c1	comp62708_c1	-		ko00190(Oxidative phosphorylation);ko04142(Lysosome);ko04145(Phagosome);ko04966(Collecting duct acid secretion)
mtr-miR156h-3p_1ss8AC	comp44213_c0	comp44213_c0	-
mtr-miR156h-3p_1ss8AC	comp23369_c0	comp23369_c0	-
mtr-miR156h-3p_1ss8AC	comp4771_c0	comp4771_c0	-
mtr-miR156h-3p_1ss8AC	comp536509_c0	comp536509_c0	sp|Q9LVI6|RLK90_ARATH Probable inactive receptor kinase RLK902 OS=Arabidopsis thaliana GN=RLK902 PE=1 SV=1	GO:0016021(integral to membrane);GO:0005886(plasma membrane);GO:0009506(plasmodesma);GO:0005524(ATP binding);GO:0004672(protein kinase activity);GO:0004872(receptor activity)
mtr-miR156h-3p_1ss8AC	comp42560_c0	comp42560_c0	-
mtr-miR156h-3p_1ss8AC	comp61016_c0	comp61016_c0	-
mtr-miR156h-3p_1ss8AC	comp56696_c0	comp56696_c0	sp|Q47153|FHIA_ECOLI Putative protein FhiA OS=Escherichia coli (strain K12) GN=fhiA PE=5 SV=1	GO:0016021(integral to membrane);GO:0005886(plasma membrane);GO:0009306(protein secretion)
mtr-miR156h-3p_1ss8AC	comp46829_c0	comp46829_c0	-
mtr-miR156h-3p_1ss8AC	comp60561_c0	comp60561_c0	sp|Q6ID77|MED11_ARATH Mediator of RNA polymerase II transcription subunit 11 OS=Arabidopsis thaliana GN=MED11 PE=1 SV=1
mtr-miR156h-3p_1ss8AC	comp31304_c0	comp31304_c0	-
mtr-miR156h-3p_1ss8AC	comp48125_c0	comp48125_c0	-
mtr-miR156h-3p_1ss8AC	comp63411_c0	comp63411_c0	sp|Q9SPK4|PPCK1_ARATH Phosphoenolpyruvate carboxylase kinase 1 OS=Arabidopsis thaliana GN=PPCK1 PE=1 SV=1	GO:0005524(ATP binding);GO:0004674(protein serine/threonine kinase activity);GO:0046898(response to cycloheximide);GO:0009416(response to light stimulus)
mtr-miR156h-3p_1ss8AC	comp40582_c0	comp40582_c0	-
mtr-miR156h-3p_1ss8AC	comp58989_c0	comp58989_c0	sp|Q9LX99|GRIMP_ARATH Geminivirus Rep-interacting motor protein OS=Arabidopsis thaliana GN=GRIMP PE=1 SV=1	GO:0009504(cell plate);GO:0009941(chloroplast envelope);GO:0005694(chromosome);GO:0005829(cytosol);GO:0005874(microtubule);GO:0005634(nucleus);GO:0009524(phragmoplast);GO:0005886(plasma membrane);GO:0005819(spindle);GO:0005524(ATP binding);GO:0008017(microtubule binding);GO:0003777(microtubule motor activity);GO:0009904(chloroplast accumulation movement);GO:0009903(chloroplast avoidance movement)…
mtr-miR156h-3p_1ss8AC	comp3968_c0	comp3968_c0	-
mtr-miR156h-3p_1ss8AC	comp10447_c0	comp10447_c0	-
mtr-miR156h-3p_1ss8AC	comp46589_c0	comp46589_c0	-
mtr-miR156h-3p_1ss8AC	comp55338_c0	comp55338_c0	sp|Q9C616|KAN2_ARATH Probable transcription factor KAN2 OS=Arabidopsis thaliana GN=KAN2 PE=2 SV=1	GO:0005634(nucleus);GO:0003677(DNA binding);GO:0030154(cell differentiation);GO:0048481(ovule development);GO:0009944(polarity specification of adaxial/abaxial axis);GO:0006355(regulation of transcription, DNA-dependent);GO:0006351(transcription, DNA-dependent)
mtr-miR156h-3p_1ss8AC	comp227620_c0	comp227620_c0	-
mtr-miR156h-3p_1ss8AC	comp32933_c0	comp32933_c0	sp|P93092|ACP1_CASGL Acyl carrier protein 1, chloroplastic OS=Casuarina glauca GN=ACP1 PE=2 SV=1	GO:0009507(chloroplast);GO:0000036(acyl carrier activity);GO:0048037(cofactor binding);GO:0031177(phosphopantetheine binding);GO:0006633(fatty acid biosynthetic process)	ko00190(Oxidative phosphorylation)
mtr-miR156h-3p_1ss8AC	comp4504_c0	comp4504_c0	sp|Q42564|APX3_ARATH L-ascorbate peroxidase 3, peroxisomal OS=Arabidopsis thaliana GN=APX3 PE=2 SV=1	GO:0009941(chloroplast envelope);GO:0046861(glyoxysomal membrane);GO:0009514(glyoxysome);GO:0016021(integral to membrane);GO:0005739(mitochondrion);GO:0009506(plasmodesma);GO:0005774(vacuolar membrane);GO:0020037(heme binding);GO:0016688(L-ascorbate peroxidase activity);GO:0042744(hydrogen peroxide catabolic process)	ko00053(Ascorbate and aldarate metabolism);ko00480(Glutathione metabolism)
mtr-miR156h-3p_1ss8AC	comp66557_c3	comp66557_c3	-
mtr-miR156h-3p_1ss8AC	comp21999_c0	comp21999_c0	-
mtr-miR156h-3p_1ss8AC	comp43591_c0	comp43591_c0	-
mtr-miR156h-3p_1ss8AC	comp65787_c0	comp65787_c0	sp|Q949R4|DIOXL_ARATH 4,5-DOPA dioxygenase extradiol-like protein OS=Arabidopsis thaliana GN=At4g15093 PE=2 SV=1	GO:0008198(ferrous iron binding);GO:0016701(oxidoreductase activity, acting on single donors with incorporation of molecular oxygen);GO:0008270(zinc ion binding);GO:0006725(cellular aromatic compound metabolic process)
mtr-miR156h-3p_1ss8AC	comp63482_c0	comp63482_c0	-
mtr-miR156h-3p_1ss8AC	comp30791_c0	comp30791_c0	-
mtr-miR156h-3p_1ss8AC	comp66339_c0	comp66339_c0	-
mtr-miR156h-3p_1ss8AC	comp30544_c0	comp30544_c0	sp|P49333|ETR1_ARATH Ethylene receptor 1 OS=Arabidopsis thaliana GN=ETR1 PE=1 SV=1	GO:0005789(endoplasmic reticulum membrane);GO:0016021(integral to membrane);GO:0005524(ATP binding);GO:0051740(ethylene binding);GO:0046872(metal ion binding);GO:0005515(protein binding);GO:0004872(receptor activity);GO:0000156(two-component response regulator activity);GO:0000155(two-component sensor activity);GO:0071281(cellular response to iron ion);GO:0009690(cytokinin metabolic process);GO:0…
mtr-miR156h-3p_1ss8AC	comp39397_c0	comp39397_c0	sp|O96827|EF1B_DROME Probable elongation factor 1-beta OS=Drosophila melanogaster GN=Ef1beta PE=1 SV=3	GO:0005829(cytosol);GO:0005853(eukaryotic translation elongation factor 1 complex);GO:0003746(translation elongation factor activity)
mtr-miR156h-3p_1ss8AC	comp32469_c0	comp32469_c0	sp|P42654|1433B_VICFA 14-3-3-like protein B OS=Vicia faba PE=2 SV=1	GO:0019904(protein domain specific binding)	ko04110(Cell cycle);ko04114(Oocyte meiosis);ko04722(Neurotrophin signaling pathway)
mtr-miR156h-3p_1ss8AC	comp33365_c0	comp33365_c0	-
mtr-miR156h-3p_1ss8AC	comp68307_c0	comp68307_c0	sp|Q9ZV48|TPS11_ARATH Probable alpha,alpha-trehalose-phosphate synthase [UDP-forming] 11 OS=Arabidopsis thaliana GN=TPS11 PE=2 SV=1	GO:0005829(cytosol);GO:0005739(mitochondrion);GO:0003825(alpha,alpha-trehalose-phosphate synthase );GO:0005992(trehalose biosynthetic process)	ko00500(Starch and sucrose metabolism)
mtr-miR156h-3p_1ss8AC	comp57542_c0	comp57542_c0	-
mtr-miR156h-3p_1ss8AC	comp286046_c0	comp286046_c0	-
mtr-miR156h-3p_1ss8AC	comp2706_c0	comp2706_c0	-
mtr-miR156h-3p_1ss8AC	comp67124_c0	comp67124_c0	sp|Q5VRY0|RH39_ORYSJ DEAD-box ATP-dependent RNA helicase 39 OS=Oryza sativa subsp. japonica GN=Os01g0184500 PE=2 SV=1	GO:0005524(ATP binding);GO:0008026(ATP-dependent helicase activity)
mtr-miR156h-3p_1ss8AC	comp51725_c0	comp51725_c0	-
mtr-miR156h-3p_1ss8AC	comp53008_c0	comp53008_c0	sp|O63066|SECY_MAIZE Preprotein translocase subunit SECY, chloroplastic OS=Zea mays GN=SECY PE=2 SV=1	GO:0009535(chloroplast thylakoid membrane);GO:0016021(integral to membrane);GO:0015450(P-P-bond-hydrolysis-driven protein transmembrane transporter activity)	ko03060(Protein export);ko04145(Phagosome)
mtr-miR156h-3p_1ss8AC	comp26768_c0	comp26768_c0	-
mtr-miR156h-3p_1ss8AC	comp47357_c0	comp47357_c0	-
mtr-miR156h-3p_1ss8AC	comp61862_c0	comp61862_c0	sp|Q9CXF4|TBC15_MOUSE TBC1 domain family member 15 OS=Mus musculus GN=Tbc1d15 PE=1 SV=1	GO:0005576(extracellular region);GO:0005739(mitochondrion);GO:0005097(Rab GTPase activator activity)
mtr-miR156h-3p_1ss8AC	comp65947_c0	comp65947_c0	-
mtr-miR156h-3p_1ss8AC	comp51317_c0	comp51317_c0	-
mtr-miR156h-3p_1ss8AC	comp68305_c0	comp68305_c0	sp|Q9SJY5|PUMP5_ARATH Mitochondrial uncoupling protein 5 OS=Arabidopsis thaliana GN=PUMP5 PE=2 SV=1
mtr-miR156h-3p_1ss8AC	comp55344_c0	comp55344_c0	sp|Q38859|RPB11_ARATH DNA-directed RNA polymerase II subunit RPB11 OS=Arabidopsis thaliana GN=RPB13.6 PE=2 SV=1	GO:0005665(DNA-directed RNA polymerase II, core complex);GO:0000418(DNA-directed RNA polymerase IV complex);GO:0000419(DNA-directed RNA polymerase V complex);GO:0003677(DNA binding);GO:0003899(DNA-directed RNA polymerase activity);GO:0046983(protein dimerization activity)	ko00230(Purine metabolism);ko00240(Pyrimidine metabolism);ko03020(RNA polymerase)
mtr-miR156h-3p_1ss8AC	comp55655_c0	comp55655_c0	sp|Q5XF57|Y5576_ARATH Probable receptor-like serine/threonine-protein kinase At5g57670 OS=Arabidopsis thaliana GN=At5g57670 PE=2 SV=1	GO:0005524(ATP binding);GO:0004674(protein serine/threonine kinase activity)
mtr-miR156h-3p_1ss8AC	comp65440_c0	comp65440_c0	sp|O23627|SYGM1_ARATH Glycine--tRNA ligase 1, mitochondrial OS=Arabidopsis thaliana GN=GLYRS-1 PE=2 SV=1	GO:0005829(cytosol);GO:0005739(mitochondrion);GO:0005524(ATP binding);GO:0004820(glycine-tRNA ligase activity);GO:0046983(protein dimerization activity);GO:0015966(diadenosine tetraphosphate biosynthetic process);GO:0006426(glycyl-tRNA aminoacylation);GO:0046686(response to cadmium ion)	ko00970(Aminoacyl-tRNA biosynthesis)
mtr-miR156h-3p_1ss8AC	comp24511_c0	comp24511_c0	-
mtr-miR156h-3p_1ss8AC	comp197131_c0	comp197131_c0	sp|Q6ICW6|WNK11_ARATH Probable serine/threonine-protein kinase WNK11 OS=Arabidopsis thaliana GN=WNK11 PE=2 SV=1	GO:0005524(ATP binding);GO:0004674(protein serine/threonine kinase activity)	ko04712(Circadian rhythm - plant)
mtr-miR156h-3p_1ss8AC	comp67351_c0	comp67351_c0	-
mtr-miR156h-3p_1ss8AC	comp68109_c0	comp68109_c0	sp|Q9XGW1|AGO10_ARATH Protein argonaute 10 OS=Arabidopsis thaliana GN=AGO10 PE=2 SV=1	GO:0030529(ribonucleoprotein complex);GO:0035198(miRNA binding);GO:0031047(gene silencing by RNA);GO:0010586(miRNA metabolic process);GO:0007275(multicellular organismal development);GO:0006355(regulation of transcription, DNA-dependent);GO:0006417(regulation of translation);GO:0035019(somatic stem cell maintenance);GO:0006351(transcription, DNA-dependent)
mtr-miR156h-3p_1ss8AC	comp68219_c0	comp68219_c0	sp|Q9ZU95|NUD17_ARATH Nudix hydrolase 17, mitochondrial OS=Arabidopsis thaliana GN=NUDT17 PE=2 SV=1	GO:0005739(mitochondrion);GO:0016787(hydrolase activity);GO:0046872(metal ion binding)
mtr-miR156h-3p_1ss8AC	comp25169_c0	comp25169_c0	-
mtr-miR156h-3p_1ss8AC	comp57496_c0	comp57496_c0	-
mtr-miR156h-3p_1ss8AC	comp54266_c0	comp54266_c0	sp|Q3UX61|NAA11_MOUSE N-alpha-acetyltransferase 11 OS=Mus musculus GN=Naa11 PE=2 SV=1	GO:0005737(cytoplasm);GO:0005634(nucleus);GO:0004596(peptide alpha-N-acetyltransferase activity)
mtr-miR156h-3p_1ss8AC	comp251270_c0	comp251270_c0	-
mtr-miR156h-3p_1ss8AC	comp53784_c0	comp53784_c0	sp|P51419|RL273_ARATH 60S ribosomal protein L27-3 OS=Arabidopsis thaliana GN=RPL27C PE=2 SV=2	GO:0022625(cytosolic large ribosomal subunit);GO:0003735(structural constituent of ribosome);GO:0006412(translation)	ko03010(Ribosome)
mtr-miR156h-3p_1ss8AC	comp49225_c0	comp49225_c0	sp|Q8BKC5|IPO5_MOUSE Importin-5 OS=Mus musculus GN=Ipo5 PE=1 SV=3	GO:0005737(cytoplasm);GO:0005634(nucleus);GO:0005515(protein binding);GO:0008565(protein transporter activity)
mtr-miR156h-3p_1ss8AC	comp41791_c0	comp41791_c0	-
mtr-miR156h-3p_1ss8AC	comp66720_c0	comp66720_c0	-
mtr-miR156h-3p_1ss8AC	comp49067_c0	comp49067_c0	sp|Q9STM3|REF6_ARATH Lysine-specific demethylase REF6 OS=Arabidopsis thaliana GN=REF6 PE=1 SV=1	GO:0005634(nucleus);GO:0003676(nucleic acid binding);GO:0016702(oxidoreductase activity, acting on single donors with incorporation of molecular oxygen, incorporation of two atoms of oxygen);GO:0008270(zinc ion binding);GO:0033169(histone H3-K9 demethylation);GO:0048366(leaf development);GO:0035067(negative regulation of histone acetylation);GO:0006355(regulation of transcription, DNA-dependent);…
mtr-miR156h-3p_1ss8AC	comp50943_c0	comp50943_c0	-
mtr-miR156h-3p_1ss8AC	comp54068_c0	comp54068_c0	-
mtr-miR156h-3p_1ss8AC	comp46968_c0	comp46968_c0	-
mtr-miR156h-3p_1ss8AC	comp537440_c0	comp537440_c0	-
mtr-miR156h-3p_1ss8AC	comp63335_c1	comp63335_c1	-
mtr-miR156h-3p_1ss8AC	comp62137_c0	comp62137_c0	sp|Q8GYB1|NUD15_ARATH Nudix hydrolase 15, mitochondrial OS=Arabidopsis thaliana GN=NUDT15 PE=1 SV=2	GO:0005739(mitochondrion);GO:0010945(CoA pyrophosphatase activity);GO:0046872(metal ion binding)
mtr-miR156h-3p_1ss8AC	comp42633_c0	comp42633_c0	-
mtr-miR156h-3p_1ss8AC	comp51002_c0	comp51002_c0	sp|Q5F3P8|SET1B_CHICK Histone-lysine N-methyltransferase SETD1B OS=Gallus gallus GN=SETD1B PE=2 SV=1	GO:0005694(chromosome);GO:0016607(nuclear speck);GO:0000166(nucleotide binding);GO:0003723(RNA binding);GO:0006355(regulation of transcription, DNA-dependent);GO:0006351(transcription, DNA-dependent)
mtr-miR156h-3p_1ss8AC	comp49002_c0	comp49002_c0	-
mtr-miR156h-3p_1ss8AC	comp257431_c0	comp257431_c0	-
mtr-miR156h-3p_1ss8AC	comp67612_c0	comp67612_c0	sp|F4HQD4|HSP7P_ARATH Heat shock 70 kDa protein 15 OS=Arabidopsis thaliana GN=HSP70-15 PE=2 SV=1		ko04612(Antigen processing and presentation)
mtr-miR156h-3p_1ss8AC	comp66361_c0	comp66361_c0	-
mtr-miR156h-3p_1ss8AC	comp21219_c0	comp21219_c0	sp|Q6NY89|LSG1_DANRE Large subunit GTPase 1 homolog OS=Danio rerio GN=lsg1 PE=2 SV=1	GO:0015030(Cajal body);GO:0005783(endoplasmic reticulum);GO:0005525(GTP binding);GO:0016787(hydrolase activity);GO:0051168(nuclear export);GO:0015031(protein transport)
mtr-miR156h-3p_1ss8AC	comp57034_c0	comp57034_c0	sp|O65743|RL24_CICAR 60S ribosomal protein L24 OS=Cicer arietinum GN=RPL24 PE=2 SV=1	GO:0005840(ribosome);GO:0003735(structural constituent of ribosome);GO:0006412(translation)	ko03010(Ribosome)
mtr-miR156h-3p_1ss8AC	comp571698_c0	comp571698_c0	sp|Q9SKQ4|PP167_ARATH Pentatricopeptide repeat-containing protein At2g21090 OS=Arabidopsis thaliana GN=PCMP-E48 PE=2 SV=1	GO:0005488(binding)
mtr-miR156h-3p_1ss8AC	comp14662_c0	comp14662_c0	-
mtr-miR156h-3p_1ss8AC	comp365602_c0	comp365602_c0	-
mtr-miR156h-3p_1ss8AC	comp56053_c0	comp56053_c0	-
mtr-miR156h-3p_1ss8AC	comp57615_c0	comp57615_c0	-		ko00630(Glyoxylate and dicarboxylate metabolism);ko00710(Carbon fixation in photosynthetic organisms)
mtr-miR156h-3p_1ss8AC	comp68498_c0	comp68498_c0	sp|P04825|AMPN_ECOLI Aminopeptidase N OS=Escherichia coli (strain K12) GN=pepN PE=1 SV=2	GO:0005886(plasma membrane);GO:0004177(aminopeptidase activity);GO:0008237(metallopeptidase activity);GO:0008270(zinc ion binding);GO:0006508(proteolysis)	ko00480(Glutathione metabolism)
mtr-miR156h-3p_1ss8AC	comp58930_c0	comp58930_c0	-
mtr-miR156h-3p_1ss8AC	comp20185_c0	comp20185_c0	-
mtr-miR156h-3p_1ss8AC	comp56158_c0	comp56158_c0	-
mtr-miR156h-3p_1ss8AC	comp92936_c0	comp92936_c0	sp|P0C5H5|GAOX2_ORYSI Gibberellin 20 oxidase 2 OS=Oryza sativa subsp. indica GN=20ox2 PE=1 SV=1	GO:0005506(iron ion binding);GO:0016706(oxidoreductase activity, acting on paired donors, with incorporation or reduction of molecular oxygen, 2-oxoglutarate as one donor, and incorporation of one atom each of oxygen into both donors)	ko00904(Diterpenoid biosynthesis)
mtr-miR156h-3p_1ss8AC	comp52832_c0	comp52832_c0	-
mtr-miR156h-3p_1ss8AC	comp66077_c0	comp66077_c0	sp|Q40554|EIF3A_TOBAC Eukaryotic translation initiation factor 3 subunit A OS=Nicotiana tabacum GN=TIF3A1 PE=2 SV=1	GO:0005737(cytoplasm);GO:0003743(translation initiation factor activity)
mtr-miR156h-3p_1ss8AC	comp53059_c0	comp53059_c0	sp|Q9LHG8|ELC_ARATH Protein ELC OS=Arabidopsis thaliana GN=ELC PE=1 SV=1	GO:0005769(early endosome);GO:0005770(late endosome);GO:0043234(protein complex);GO:0043130(ubiquitin binding);GO:0051301(cell division);GO:0006464(protein modification process);GO:0015031(protein transport);GO:0010091(trichome branching)	ko04144(Endocytosis)
mtr-miR156h-3p_1ss8AC	comp33019_c0	comp33019_c0	sp|Q54RF3|EI2BE_DICDI Translation initiation factor eIF-2B subunit epsilon OS=Dictyostelium discoideum GN=eif2b5 PE=3 SV=1	GO:0005851(eukaryotic translation initiation factor 2B complex);GO:0043614(multi-eIF complex);GO:0005488(binding);GO:0005085(guanyl-nucleotide exchange factor activity);GO:0016779(nucleotidyltransferase activity);GO:0009058(biosynthetic process);GO:0016070(RNA metabolic process)
mtr-miR156h-3p_1ss8AC	comp47233_c0	comp47233_c0	-
mtr-miR156h-3p_1ss8AC	comp57941_c0	comp57941_c0	sp|Q0DJV6|CML18_ORYSJ Probable calcium-binding protein CML18 OS=Oryza sativa subsp. japonica GN=CML18 PE=2 SV=1	GO:0005509(calcium ion binding)	ko04020(Calcium signaling pathway);ko04070(Phosphatidylinositol signaling system);ko04114(Oocyte meiosis);ko04270(Vascular smooth muscle contraction);ko04626(Plant-pathogen interaction);ko04720(Long-term potentiation);ko04722(Neurotrophin signaling pathway);ko04740(Olfactory transduction);ko04744(Phototransduction);ko04910(Insulin signaling pathway);ko04912(GnRH signaling pathway);ko04916(Melanog…
mtr-miR156h-3p_1ss8AC	comp48234_c0	comp48234_c0	-
mtr-miR156h-3p_1ss8AC	comp46434_c0	comp46434_c0	-		ko00330(Arginine and proline metabolism)
mtr-miR156h-3p_1ss8AC	comp62876_c0	comp62876_c0	sp|P17639|EMB1_DAUCA EMB-1 protein OS=Daucus carota GN=EMB-1 PE=2 SV=1
mtr-miR156h-3p_1ss8AC	comp67238_c0	comp67238_c0	sp|Q9LSC2|Y3589_ARATH PTI1-like tyrosine-protein kinase At3g15890 OS=Arabidopsis thaliana GN=At3g15890 PE=1 SV=1	GO:0005886(plasma membrane);GO:0005524(ATP binding);GO:0004715(non-membrane spanning protein tyrosine kinase activity)
mtr-miR156h-3p_1ss8AC	comp4891_c0	comp4891_c0	-
mtr-miR156h-3p_1ss8AC	comp67794_c0	comp67794_c0	sp|Q9SD39|PMTR_ARATH Probable methyltransferase PMT27 OS=Arabidopsis thaliana GN=At3g51070 PE=3 SV=1	GO:0005789(endoplasmic reticulum membrane);GO:0016021(integral to membrane);GO:0008168(methyltransferase activity)	ko03040(Spliceosome)
mtr-miR156h-3p_1ss8AC	comp51205_c0	comp51205_c0	-
mtr-miR156h-3p_1ss8AC	comp44260_c0	comp44260_c0	-
mtr-miR156h-3p_1ss8AC	comp38438_c0	comp38438_c0	-
mtr-miR156h-3p_1ss8AC	comp61387_c0	comp61387_c0	sp|Q9SZ67|WRK19_ARATH Probable WRKY transcription factor 19 OS=Arabidopsis thaliana GN=WRKY19 PE=2 SV=1	GO:0009941(chloroplast envelope);GO:0031224(intrinsic to membrane);GO:0005634(nucleus);GO:0005524(ATP binding);GO:0017111(nucleoside-triphosphatase activity);GO:0005515(protein binding);GO:0004674(protein serine/threonine kinase activity);GO:0043565(sequence-specific DNA binding);GO:0003700(sequence-specific DNA binding transcription factor activity);GO:0004888(transmembrane signaling receptor ac…
mtr-miR156h-3p_1ss8AC	comp59873_c0	comp59873_c0	sp|Q9SD39|PMTR_ARATH Probable methyltransferase PMT27 OS=Arabidopsis thaliana GN=At3g51070 PE=3 SV=1	GO:0005789(endoplasmic reticulum membrane);GO:0016021(integral to membrane);GO:0008168(methyltransferase activity)
mtr-miR156h-3p_1ss8AC	comp65662_c0	comp65662_c0	sp|P27788|FER3_MAIZE Ferredoxin-3, chloroplastic OS=Zea mays GN=FDX3 PE=2 SV=1	GO:0009507(chloroplast);GO:0051537(2 iron, 2 sulfur cluster binding);GO:0009055(electron carrier activity);GO:0046872(metal ion binding);GO:0022900(electron transport chain);GO:0006810(transport)	ko00195(Photosynthesis)
mtr-miR156h-3p_1ss8AC	comp61753_c0	comp61753_c0	sp|Q8VYP0|SCO11_ARATH Protein SCO1 homolog 1, mitochondrial OS=Arabidopsis thaliana GN=HCC1 PE=2 SV=1	GO:0016021(integral to membrane);GO:0005743(mitochondrial inner membrane);GO:0005507(copper ion binding);GO:0006878(cellular copper ion homeostasis);GO:0006825(copper ion transport);GO:0009790(embryo development);GO:0033617(mitochondrial respiratory chain complex IV assembly)
mtr-miR156h-3p_1ss8AC	comp53018_c0	comp53018_c0	sp|Q9STM4|C3H43_ARATH Zinc finger CCCH domain-containing protein 43 OS=Arabidopsis thaliana GN=At3g48440 PE=1 SV=1	GO:0005634(nucleus);GO:0003677(DNA binding);GO:0008270(zinc ion binding)
mtr-miR156h-3p_1ss8AC	comp55069_c0	comp55069_c0	sp|Q38879|TRXH2_ARATH Thioredoxin H2 OS=Arabidopsis thaliana GN=TRX2 PE=2 SV=2	GO:0005829(cytosol);GO:0005739(mitochondrion);GO:0005886(plasma membrane);GO:0009055(electron carrier activity);GO:0016671(oxidoreductase activity, acting on a sulfur group of donors, disulfide as acceptor);GO:0015035(protein disulfide oxidoreductase activity);GO:0045454(cell redox homeostasis);GO:0022900(electron transport chain);GO:0006662(glycerol ether metabolic process);GO:0000103(sulfate as…
mtr-miR156h-3p_1ss8AC	comp35068_c0	comp35068_c0	sp|Q9LJP4|CSLC4_ARATH Xyloglucan glycosyltransferase 4 OS=Arabidopsis thaliana GN=CSLC4 PE=1 SV=1	GO:0000139(Golgi membrane);GO:0016021(integral to membrane);GO:0005886(plasma membrane);GO:0016757(transferase activity, transferring glycosyl groups);GO:0007047(cellular cell wall organization)
mtr-miR156h-3p_1ss8AC	comp35544_c0	comp35544_c0	sp|Q8RWZ5|SD25_ARATH G-type lectin S-receptor-like serine/threonine-protein kinase SD2-5 OS=Arabidopsis thaliana GN=SD25 PE=1 SV=1	GO:0016021(integral to membrane);GO:0044459(plasma membrane part);GO:0005524(ATP binding);GO:0005516(calmodulin binding);GO:0004674(protein serine/threonine kinase activity);GO:0004872(receptor activity);GO:0005529(sugar binding);GO:0031625(ubiquitin protein ligase binding);GO:0046777(protein autophosphorylation)
mtr-miR156h-3p_1ss8AC	comp55519_c0	comp55519_c0	-
mtr-miR156h-3p_1ss8AC	comp68070_c0	comp68070_c0	sp|Q5RC80|RBM39_PONAB RNA-binding protein 39 OS=Pongo abelii GN=RBM39 PE=2 SV=1	GO:0016607(nuclear speck);GO:0000166(nucleotide binding);GO:0003723(RNA binding);GO:0006397(mRNA processing);GO:0006355(regulation of transcription, DNA-dependent);GO:0008380(RNA splicing);GO:0006351(transcription, DNA-dependent)	ko03022(Basal transcription factors)
mtr-miR156h-3p_1ss8AC	comp58976_c0	comp58976_c0	sp|P42654|1433B_VICFA 14-3-3-like protein B OS=Vicia faba PE=2 SV=1	GO:0019904(protein domain specific binding)	ko04110(Cell cycle);ko04114(Oocyte meiosis);ko04722(Neurotrophin signaling pathway)
mdm-miR7122a_2ss4TA21CG	comp62375_c0	comp62375_c0	-
mdm-miR7122a_2ss4TA21CG	comp825112_c0	comp825112_c0	-
mdm-miR7122a_2ss4TA21CG	comp68377_c0	comp68377_c0	sp|P0AES7|GYRB_ECO57 DNA gyrase subunit B OS=Escherichia coli O157:H7 GN=gyrB PE=3 SV=2	GO:0005694(chromosome);GO:0005737(cytoplasm);GO:0005524(ATP binding);GO:0003918(DNA topoisomerase );GO:0006265(DNA topological change);GO:0046677(response to antibiotic)
mdm-miR7122a_2ss4TA21CG	comp66945_c0	comp66945_c0	sp|P42217|KPSC5_ECOLX Capsule polysaccharide export protein KpsC OS=Escherichia coli GN=kpsC PE=4 SV=1	GO:0005737(cytoplasm);GO:0000271(polysaccharide biosynthetic process);GO:0015774(polysaccharide transport)	ko00540(Lipopolysaccharide biosynthesis)
mdm-miR7122a_2ss4TA21CG	comp47457_c0	comp47457_c0	-
mdm-miR7122a_2ss4TA21CG	comp37913_c0	comp37913_c0	-
mdm-miR7122a_2ss4TA21CG	comp50115_c0	comp50115_c0	sp|A4G8T6|DDL_HERAR D-alanine--D-alanine ligase OS=Herminiimonas arsenicoxydans GN=ddl PE=3 SV=1	GO:0005618(cell wall);GO:0005737(cytoplasm);GO:0005524(ATP binding);GO:0008716(D-alanine-D-alanine ligase activity);GO:0046872(metal ion binding);GO:0007047(cellular cell wall organization);GO:0009252(peptidoglycan biosynthetic process);GO:0008360(regulation of cell shape)
mdm-miR7122a_2ss4TA21CG	comp68556_c0	comp68556_c0	sp|P31434|XYLS_ECOLI Alpha-xylosidase OS=Escherichia coli (strain K12) GN=yicI PE=1 SV=2	GO:0030246(carbohydrate binding);GO:0004553(hydrolase activity, hydrolyzing O-glycosyl compounds);GO:0005975(carbohydrate metabolic process)	ko03440(Homologous recombination)
mdm-miR7122a_2ss4TA21CG	comp13487_c0	comp13487_c0	-
mdm-miR7122a_2ss4TA21CG	comp67637_c0	comp67637_c0	sp|O96552|CHMP1_DICDI Charged multivesicular body protein 1 OS=Dictyostelium discoideum GN=chmp1 PE=3 SV=1	GO:0010008(endosome membrane);GO:0005770(late endosome);GO:0045324(late endosome to vacuole transport);GO:0006623(protein targeting to vacuole)	ko04144(Endocytosis)
mdm-miR7122a_2ss4TA21CG	comp60512_c0	comp60512_c0	sp|Q9CA75|GT5_ARATH Putative glycosyltransferase 5 OS=Arabidopsis thaliana GN=GT5 PE=2 SV=1	GO:0000139(Golgi membrane);GO:0016021(integral to membrane);GO:0016758(transferase activity, transferring hexosyl groups);GO:0033843(xyloglucan 6-xylosyltransferase activity);GO:0048767(root hair elongation)
mdm-miR7122a_2ss4TA21CG	comp58642_c0	comp58642_c0	sp|Q2RAC5|CCT13_ORYSJ Cyclin-T1-3 OS=Oryza sativa subsp. japonica GN=CYCT1-3 PE=3 SV=2	GO:0019901(protein kinase binding);GO:0007049(cell cycle);GO:0051301(cell division);GO:0000079(regulation of cyclin-dependent protein kinase activity);GO:0006355(regulation of transcription, DNA-dependent)
mdm-miR7122a_2ss4TA21CG	comp68233_c0	comp68233_c0	sp|Q46811|YGFK_ECOLI Uncharacterized protein YgfK OS=Escherichia coli (strain K12) GN=ygfK PE=4 SV=1	GO:0051539(4 iron, 4 sulfur cluster binding);GO:0009055(electron carrier activity);GO:0046872(metal ion binding);GO:0016491(oxidoreductase activity)
mdm-miR7122a_2ss4TA21CG	comp68071_c1	comp68071_c1	sp|P17614|ATPBM_NICPL ATP synthase subunit beta, mitochondrial OS=Nicotiana plumbaginifolia GN=ATPB PE=1 SV=1	GO:0000275(mitochondrial proton-transporting ATP synthase complex, catalytic core F);GO:0005524(ATP binding);GO:0046933(hydrogen ion transporting ATP synthase activity, rotational mechanism);GO:0008553(hydrogen-exporting ATPase activity, phosphorylative mechanism);GO:0046961(proton-transporting ATPase activity, rotational mechanism);GO:0015991(ATP hydrolysis coupled proton transport);GO:0015986(A…	ko00190(Oxidative phosphorylation)
mdm-miR7122a_2ss4TA21CG	comp67910_c0	comp67910_c0	sp|P39385|YJIN_ECOLI Uncharacterized protein YjiN OS=Escherichia coli (strain K12) GN=yjiN PE=4 SV=1	GO:0016021(integral to membrane);GO:0005886(plasma membrane)
mdm-miR7122a_2ss4TA21CG	comp61636_c0	comp61636_c0	sp|P0AF17|MURJ_ECO57 Protein MurJ homolog OS=Escherichia coli O157:H7 GN=murJ PE=3 SV=1	GO:0016021(integral to membrane);GO:0005886(plasma membrane)	ko00240(Pyrimidine metabolism)
mdm-miR7122a_2ss4TA21CG	comp59281_c0	comp59281_c0	sp|Q9I7A9|RSMB_PSEAE Ribosomal RNA small subunit methyltransferase B OS=Pseudomonas aeruginosa (strain ATCC 15692 / PAO1 / 1C / PRS 101 / LMG 12228) GN=rsmB PE=3 SV=1	GO:0005737(cytoplasm);GO:0003723(RNA binding);GO:0008649(rRNA methyltransferase activity);GO:0006355(regulation of transcription, DNA-dependent)
mdm-miR7122a_2ss4TA21CG	comp779307_c0	comp779307_c0	-
mdm-miR7122a_2ss4TA21CG	comp572430_c0	comp572430_c0	-
mdm-miR7122a_2ss4TA21CG	comp61914_c0	comp61914_c0	sp|Q9FNY0|E2FA_ARATH Transcription factor E2FA OS=Arabidopsis thaliana GN=E2FA PE=1 SV=1	GO:0005737(cytoplasm);GO:0005667(transcription factor complex);GO:0003677(DNA binding);GO:0005515(protein binding);GO:0003700(sequence-specific DNA binding transcription factor activity);GO:0007049(cell cycle);GO:0051446(positive regulation of meiotic cell cycle);GO:0045893(positive regulation of transcription, DNA-dependent)
mdm-miR7122a_2ss4TA21CG	comp4743_c0	comp4743_c0	-
mdm-miR7122a_2ss4TA21CG	comp257469_c0	comp257469_c0	-
mdm-miR7122a_2ss4TA21CG	comp28470_c0	comp28470_c0	-
mdm-miR7122a_2ss4TA21CG	comp64273_c0	comp64273_c0	sp|P30707|RL9_PEA 60S ribosomal protein L9 OS=Pisum sativum GN=RPL9 PE=1 SV=1	GO:0005840(ribosome);GO:0019843(rRNA binding);GO:0003735(structural constituent of ribosome);GO:0006412(translation)	ko03010(Ribosome)
mdm-miR7122a_2ss4TA21CG	comp62288_c0	comp62288_c0	-		ko00740(Riboflavin metabolism)
mdm-miR7122a_2ss4TA21CG	comp40814_c0	comp40814_c0	-
mdm-miR7122a_2ss4TA21CG	comp40673_c0	comp40673_c0	-
mdm-miR7122a_2ss4TA21CG	comp64845_c0	comp64845_c0	-
mdm-miR7122a_2ss4TA21CG	comp67457_c0	comp67457_c0	-
mdm-miR7122a_2ss4TA21CG	comp15623_c0	comp15623_c0	-
mdm-miR7122a_2ss4TA21CG	comp62809_c0	comp62809_c0	-
mdm-miR7122a_2ss4TA21CG	comp84234_c0	comp84234_c0	-
mdm-miR7122a_2ss4TA21CG	comp66018_c0	comp66018_c0	sp|Q9LHG8|ELC_ARATH Protein ELC OS=Arabidopsis thaliana GN=ELC PE=1 SV=1	GO:0005769(early endosome);GO:0005770(late endosome);GO:0043234(protein complex);GO:0043130(ubiquitin binding);GO:0051301(cell division);GO:0006464(protein modification process);GO:0015031(protein transport);GO:0010091(trichome branching)	ko04144(Endocytosis)
mdm-miR7122a_2ss4TA21CG	comp64222_c0	comp64222_c0	sp|Q8GVE8|CAPP4_ARATH Phosphoenolpyruvate carboxylase 4 OS=Arabidopsis thaliana GN=PPC4 PE=2 SV=1	GO:0005737(cytoplasm);GO:0008964(phosphoenolpyruvate carboxylase activity);GO:0015977(carbon fixation);GO:0015979(photosynthesis);GO:0006099(tricarboxylic acid cycle)	ko00620(Pyruvate metabolism);ko00710(Carbon fixation in photosynthetic organisms);ko00720(Reductive carboxylate cycle )
mdm-miR7122a_2ss4TA21CG	comp63618_c0	comp63618_c0	sp|P51413|RL172_ARATH 60S ribosomal protein L17-2 OS=Arabidopsis thaliana GN=RPL17B PE=2 SV=2	GO:0022625(cytosolic large ribosomal subunit);GO:0016020(membrane);GO:0005730(nucleolus);GO:0009506(plasmodesma);GO:0005773(vacuole);GO:0003735(structural constituent of ribosome);GO:0006412(translation)	ko03010(Ribosome)
mdm-miR7122a_2ss4TA21CG	comp61578_c1	comp61578_c1	sp|A7ZHA4|DNAK_ECO24 Chaperone protein DnaK OS=Escherichia coli O139:H28 (strain E24377A / ETEC) GN=dnaK PE=3 SV=1	GO:0005524(ATP binding);GO:0051082(unfolded protein binding);GO:0006457(protein folding);GO:0006950(response to stress)	ko03018(RNA degradation)
mdm-miR7122a_2ss4TA21CG	comp49928_c0	comp49928_c0	-
mdm-miR7122a_2ss4TA21CG	comp372471_c0	comp372471_c0	-
mdm-miR7122a_2ss4TA21CG	comp25833_c1	comp25833_c1	-
mdm-miR7122a_2ss4TA21CG	comp35514_c0	comp35514_c0	-
mdm-miR7122a_2ss4TA21CG	comp396427_c0	comp396427_c0	sp|Q9FNI7|CSLA2_ARATH Glucomannan 4-beta-mannosyltransferase 2 OS=Arabidopsis thaliana GN=CSLA2 PE=2 SV=1	GO:0000139(Golgi membrane);GO:0016021(integral to membrane);GO:0047259(glucomannan 4-beta-mannosyltransferase activity);GO:0051753(mannan synthase activity);GO:0007047(cellular cell wall organization)
mdm-miR7122a_2ss4TA21CG	comp58517_c0	comp58517_c0	sp|A7PHN8|CSPL4_VITVI CASP-like protein VIT_17s0000g00560 OS=Vitis vinifera GN=VIT_17s0000g00560 PE=2 SV=2	GO:0016021(integral to membrane);GO:0005886(plasma membrane)
mdm-miR7122a_2ss4TA21CG	comp47034_c0	comp47034_c0	-		ko04962(Vasopressin-regulated water reabsorption)
mdm-miR7122a_2ss4TA21CG	comp17524_c0	comp17524_c0	-
mdm-miR7122a_2ss4TA21CG	comp50266_c0	comp50266_c0	-
mdm-miR7122a_2ss4TA21CG	comp54288_c0	comp54288_c0	sp|Q38897|BEL1_ARATH Homeobox protein BEL1 homolog OS=Arabidopsis thaliana GN=BEL1 PE=1 SV=2	GO:0005829(cytosol);GO:0005634(nucleus);GO:0009506(plasmodesma);GO:0005515(protein binding);GO:0043565(sequence-specific DNA binding);GO:0003700(sequence-specific DNA binding transcription factor activity)
mdm-miR7122a_2ss4TA21CG	comp43829_c0	comp43829_c0	-
mdm-miR7122a_2ss4TA21CG	comp59632_c0	comp59632_c0	sp|Q84WQ5|CBSX5_ARATH CBS domain-containing protein CBSX5 OS=Arabidopsis thaliana GN=CBSX5 PE=2 SV=2
mdm-miR7122a_2ss4TA21CG	comp50708_c0	comp50708_c0	sp|C5H8J1|EME1B_ARATH Crossover junction endonuclease EME1B OS=Arabidopsis thaliana GN=EME1B PE=1 SV=1
mdm-miR7122a_2ss4TA21CG	comp779490_c0	comp779490_c0	-
mdm-miR7122a_2ss4TA21CG	comp58346_c0	comp58346_c0	-
mdm-miR7122a_2ss4TA21CG	comp43230_c0	comp43230_c0	-
mdm-miR7122a_2ss4TA21CG	comp50918_c0	comp50918_c0	-
mdm-miR7122a_2ss4TA21CG	comp38816_c0	comp38816_c0	-
mdm-miR7122a_2ss4TA21CG	comp64236_c0	comp64236_c0	sp|P62518|OPGH_ECO57 Glucans biosynthesis glucosyltransferase H OS=Escherichia coli O157:H7 GN=mdoH PE=3 SV=1	GO:0016021(integral to membrane);GO:0005886(plasma membrane);GO:0016758(transferase activity, transferring hexosyl groups)
mdm-miR7122a_2ss4TA21CG	comp68517_c0	comp68517_c0	sp|P21179|CATE_ECOLI Catalase HPII OS=Escherichia coli (strain K12) GN=katE PE=1 SV=1	GO:0005829(cytosol);GO:0004096(catalase activity);GO:0020037(heme binding);GO:0042744(hydrogen peroxide catabolic process)	ko00380(Tryptophan metabolism);ko00680(Methane metabolism);ko04146(Peroxisome)
mdm-miR7122a_2ss4TA21CG	comp55722_c0	comp55722_c0	-
mdm-miR7122a_2ss4TA21CG	comp58260_c0	comp58260_c0	-
mdm-miR7122a_2ss4TA21CG	comp335440_c0	comp335440_c0	sp|Q9SXA1|P4KA1_ARATH Phosphatidylinositol 4-kinase alpha OS=Arabidopsis thaliana GN=PI4KALPHA1 PE=1 SV=2	GO:0016020(membrane);GO:0048471(perinuclear region of cytoplasm);GO:0004430(1-phosphatidylinositol 4-kinase activity);GO:0051015(actin filament binding);GO:0070300(phosphatidic acid binding);GO:0005546(phosphatidylinositol-4,5-bisphosphate binding);GO:0070273(phosphatidylinositol-4-phosphate binding);GO:0048015(phosphatidylinositol-mediated signaling)	ko00562(Inositol phosphate metabolism);ko04070(Phosphatidylinositol signaling system)
mdm-miR7122a_2ss4TA21CG	comp477052_c0	comp477052_c0	-
mdm-miR7122a_2ss4TA21CG	comp59953_c0	comp59953_c0	-
mdm-miR7122a_2ss4TA21CG	comp62983_c0	comp62983_c0	-
mdm-miR7122a_2ss4TA21CG	comp56467_c0	comp56467_c0	sp|Q9C7F5|NTF2_ARATH Nuclear transport factor 2 OS=Arabidopsis thaliana GN=NTF2 PE=2 SV=1	GO:0005829(cytosol);GO:0005635(nuclear envelope);GO:0005886(plasma membrane);GO:0008536(Ran GTPase binding);GO:0006606(protein import into nucleus)
mdm-miR7122a_2ss4TA21CG	comp42521_c0	comp42521_c0	sp|P22337|STAD_RICCO Acyl-[acyl-carrier-protein] desaturase, chloroplastic OS=Ricinus communis PE=1 SV=1	GO:0009507(chloroplast);GO:0045300(acyl-[acyl-carrier-protein] desaturase activity);GO:0046914(transition metal ion binding);GO:0006633(fatty acid biosynthetic process)
mdm-miR7122a_2ss4TA21CG	comp49131_c1	comp49131_c1	sp|P93147|C81E1_GLYEC Isoflavone 2'-hydroxylase OS=Glycyrrhiza echinata GN=CYP81E1 PE=1 SV=2	GO:0016020(membrane);GO:0009055(electron carrier activity);GO:0020037(heme binding);GO:0033773(isoflavone 2'-hydroxylase activity)	ko00361(gamma-Hexachlorocyclohexane degradation);ko00626(Naphthalene and anthracene degradation);ko00903(Limonene and pinene degradation);ko00945(Stilbenoid,ko diarylheptanoid and gingerol biosynthesis)
mdm-miR7122a_2ss4TA21CG	comp68446_c0	comp68446_c0	sp|Q8H0U8|RH42_ARATH DEAD-box ATP-dependent RNA helicase 42 OS=Arabidopsis thaliana GN=RH42 PE=1 SV=2	GO:0005524(ATP binding);GO:0008026(ATP-dependent helicase activity);GO:0003723(RNA binding)
mdm-miR7122a_2ss4TA21CG	comp65363_c0	comp65363_c0	sp|Q7XTT4|NUCL2_ORYSJ Nucleolin 2 OS=Oryza sativa subsp. japonica GN=Os04g0620700 PE=2 SV=2
mdm-miR7122a_2ss4TA21CG	comp65225_c0	comp65225_c0	sp|Q9SX31|PERK9_ARATH Proline-rich receptor-like protein kinase PERK9 OS=Arabidopsis thaliana GN=PERK9 PE=2 SV=1	GO:0016021(integral to membrane);GO:0005886(plasma membrane);GO:0005524(ATP binding);GO:0004674(protein serine/threonine kinase activity)
mdm-miR7122a_2ss4TA21CG	comp63492_c0	comp63492_c0	-
mdm-miR7122a_2ss4TA21CG	comp56229_c0	comp56229_c0	-
mdm-miR7122a_2ss4TA21CG	comp61488_c0	comp61488_c0	-
mdm-miR7122a_2ss4TA21CG	comp67755_c0	comp67755_c0	sp|Q9SIC9|PP178_ARATH Pentatricopeptide repeat-containing protein At2g31400, chloroplastic OS=Arabidopsis thaliana GN=At2g31400 PE=2 SV=1	GO:0009507(chloroplast);GO:0003677(DNA binding);GO:0010019(chloroplast-nucleus signaling pathway);GO:0031930(mitochondria-nucleus signaling pathway)
mdm-miR7122a_2ss4TA21CG	comp46018_c0	comp46018_c0	-
mdm-miR7122a_2ss4TA21CG	comp261483_c0	comp261483_c0	-
mdm-miR7122a_2ss4TA21CG	comp56114_c0	comp56114_c0	-
mdm-miR7122a_2ss4TA21CG	comp53329_c0	comp53329_c0	sp|Q9SCW1|BGAL1_ARATH Beta-galactosidase 1 OS=Arabidopsis thaliana GN=BGAL1 PE=1 SV=1	GO:0048046(apoplast);GO:0009505(plant-type cell wall);GO:0009506(plasmodesma);GO:0004565(beta-galactosidase activity);GO:0043169(cation binding);GO:0005529(sugar binding);GO:0005975(carbohydrate metabolic process)
mdm-miR7122a_2ss4TA21CG	comp6773_c0	comp6773_c0	-
mdm-miR7122a_2ss4TA21CG	comp13019_c0	comp13019_c0	-
mdm-miR7122a_2ss4TA21CG	comp43099_c0	comp43099_c0	-
mdm-miR7122a_2ss4TA21CG	comp68349_c0	comp68349_c0	sp|P09831|GLTB_ECOLI Glutamate synthase [NADPH] large chain OS=Escherichia coli (strain K12) GN=gltB PE=1 SV=3	GO:0051538(3 iron, 4 sulfur cluster binding);GO:0004355(glutamate synthase );GO:0046872(metal ion binding);GO:0005515(protein binding);GO:0006537(glutamate biosynthetic process);GO:0006541(glutamine metabolic process)	ko00250(Alanine,ko aspartate and glutamate metabolism);ko00910(Nitrogen metabolism)
mdm-miR7122a_2ss4TA21CG	comp46895_c0	comp46895_c0	sp|Q84L09|GONS2_ARATH GDP-mannose transporter GONST2 OS=Arabidopsis thaliana GN=GONST2 PE=2 SV=1	GO:0000139(Golgi membrane);GO:0016021(integral to membrane);GO:0008643(carbohydrate transport)
mdm-miR7122a_2ss4TA21CG	comp68387_c0	comp68387_c0	sp|P77748|YDIJ_ECOLI Uncharacterized protein YdiJ OS=Escherichia coli (strain K12) GN=ydiJ PE=4 SV=1	GO:0009055(electron carrier activity);GO:0050660(flavin adenine dinucleotide binding);GO:0051536(iron-sulfur cluster binding);GO:0008762(UDP-N-acetylmuramate dehydrogenase activity)	ko00010(Glycolysis / Gluconeogenesis);ko00230(Purine metabolism);ko00620(Pyruvate metabolism);ko00710(Carbon fixation in photosynthetic organisms)
mdm-miR7122a_2ss4TA21CG	comp52989_c0	comp52989_c0	-
mdm-miR7122a_2ss4TA21CG	comp67554_c0	comp67554_c0	sp|P21513|RNE_ECOLI Ribonuclease E OS=Escherichia coli (strain K12) GN=rne PE=1 SV=6	GO:0005737(cytoplasm);GO:0004519(endonuclease activity);GO:0005515(protein binding);GO:0004540(ribonuclease activity);GO:0003723(RNA binding);GO:0006401(RNA catabolic process);GO:0006396(RNA processing)	ko00061(Fatty acid biosynthesis)
mdm-miR7122a_2ss4TA21CG	comp747968_c0	comp747968_c0	sp|Q8RY89|PI5K8_ARATH Phosphatidylinositol 4-phosphate 5-kinase 8 OS=Arabidopsis thaliana GN=PIP5K8 PE=2 SV=1	GO:0005886(plasma membrane);GO:0016308(1-phosphatidylinositol-4-phosphate 5-kinase activity);GO:0005524(ATP binding)	ko00562(Inositol phosphate metabolism);ko04070(Phosphatidylinositol signaling system);ko04144(Endocytosis);ko04666(Fc gamma R-mediated phagocytosis);ko04810(Regulation of actin cytoskeleton)
mdm-miR7122a_2ss4TA21CG	comp67526_c0	comp67526_c0	sp|P09546|PUTA_ECOLI Bifunctional protein PutA OS=Escherichia coli (strain K12) GN=putA PE=1 SV=3	GO:0003842(1-pyrroline-5-carboxylate dehydrogenase activity);GO:0003677(DNA binding);GO:0050660(flavin adenine dinucleotide binding);GO:0016620(oxidoreductase activity, acting on the aldehyde or oxo group of donors, NAD or NADP as acceptor);GO:0004657(proline dehydrogenase activity);GO:0003700(sequence-specific DNA binding transcription factor activity);GO:0006537(glutamate biosynthetic process);…	ko00260(Glycine,ko serine and threonine metabolism)
mdm-miR7122a_2ss4TA21CG	comp53365_c0	comp53365_c0	sp|P48417|CP74_LINUS Allene oxide synthase, chloroplastic OS=Linum usitatissimum GN=CYP74A PE=1 SV=1	GO:0009507(chloroplast);GO:0009055(electron carrier activity);GO:0020037(heme binding);GO:0047987(hydroperoxide dehydratase activity);GO:0004497(monooxygenase activity);GO:0016705(oxidoreductase activity, acting on paired donors, with incorporation or reduction of molecular oxygen);GO:0031408(oxylipin biosynthetic process)	ko00592(alpha-Linolenic acid metabolism)
mdm-miR7122a_2ss4TA21CG	comp904574_c0	comp904574_c0	-
mdm-miR7122a_2ss4TA21CG	comp42202_c0	comp42202_c0	-
mdm-miR7122a_2ss4TA21CG	comp60893_c0	comp60893_c0	sp|Q3SYZ6|XYLB_BOVIN Xylulose kinase OS=Bos taurus GN=XYLB PE=2 SV=1	GO:0005524(ATP binding);GO:0004856(xylulokinase activity);GO:0042732(D-xylose metabolic process)	ko00040(Pentose and glucuronate interconversions)
mdm-miR7122a_2ss4TA21CG	comp11352_c0	comp11352_c0	-
mdm-miR7122a_2ss4TA21CG	comp29589_c0	comp29589_c0	sp|Q9SDQ4|GLR37_ARATH Glutamate receptor 3.7 OS=Arabidopsis thaliana GN=GLR3.7 PE=2 SV=2	GO:0016021(integral to membrane);GO:0030288(outer membrane-bounded periplasmic space);GO:0005886(plasma membrane);GO:0009506(plasmodesma);GO:0005262(calcium channel activity);GO:0005234(extracellular-glutamate-gated ion channel activity);GO:0004965(GABA-B receptor activity);GO:0004970(ionotropic glutamate receptor activity);GO:0005515(protein binding);GO:0019722(calcium-mediated signaling);GO:007…
mdm-miR7122a_2ss4TA21CG	comp67648_c0	comp67648_c0	sp|P13458|SBCC_ECOLI Nuclease SbcCD subunit C OS=Escherichia coli (strain K12) GN=sbcC PE=1 SV=1	GO:0005524(ATP binding);GO:0004519(endonuclease activity);GO:0004527(exonuclease activity);GO:0006310(DNA recombination);GO:0006260(DNA replication)
mdm-miR7122a_2ss4TA21CG	comp32362_c0	comp32362_c0	sp|P46606|HD1_BRANA Homeobox protein HD1 OS=Brassica napus GN=HD1 PE=2 SV=1	GO:0005634(nucleus);GO:0043565(sequence-specific DNA binding);GO:0003700(sequence-specific DNA binding transcription factor activity)
mdm-miR7122a_2ss4TA21CG	comp64119_c0	comp64119_c0	sp|P00904|TRPG_ECOLI Anthranilate synthase component II OS=Escherichia coli (strain K12) GN=trpD PE=1 SV=3	GO:0004048(anthranilate phosphoribosyltransferase activity);GO:0004049(anthranilate synthase activity);GO:0006541(glutamine metabolic process);GO:0000162(tryptophan biosynthetic process)	ko00260(Glycine,ko serine and threonine metabolism);ko00400(Phenylalanine,ko tyrosine and tryptophan biosynthesis)
mdm-miR7122a_2ss4TA21CG	comp37612_c0	comp37612_c0	-
mdm-miR7122a_2ss4TA21CG	comp47576_c0	comp47576_c0	sp|Q50760|TLYA_MYCTU 16S/23S rRNA (cytidine-2'-O)-methyltransferase TlyA OS=Mycobacterium tuberculosis GN=tlyA PE=1 SV=2
mdm-miR7122a_2ss4TA21CG	comp64144_c0	comp64144_c0	sp|P42753|CCD31_ARATH Cyclin-D3-1 OS=Arabidopsis thaliana GN=CYCD3-1 PE=1 SV=3	GO:0005634(nucleus);GO:0005515(protein binding);GO:0051301(cell division);GO:0000082(G1/S transition of mitotic cell cycle);GO:0007067(mitosis);GO:0042127(regulation of cell proliferation);GO:0009741(response to brassinosteroid stimulus);GO:0009735(response to cytokinin stimulus);GO:0009744(response to sucrose stimulus)	ko04110(Cell cycle);ko04914(Progesterone-mediated oocyte maturation)
mdm-miR7122a_2ss4TA21CG	comp60593_c0	comp60593_c0	-
mdm-miR7122a_2ss4TA21CG	comp55682_c0	comp55682_c0	-
mdm-miR7122a_2ss4TA21CG	comp43709_c0	comp43709_c0	-
mdm-miR7122a_2ss4TA21CG	comp61578_c1	comp61578_c1	sp|A7ZHA4|DNAK_ECO24 Chaperone protein DnaK OS=Escherichia coli O139:H28 (strain E24377A / ETEC) GN=dnaK PE=3 SV=1	GO:0005524(ATP binding);GO:0051082(unfolded protein binding);GO:0006457(protein folding);GO:0006950(response to stress)	ko03018(RNA degradation)
mdm-miR7122a_2ss4TA21CG	comp43783_c0	comp43783_c0	-
mdm-miR7122a_2ss4TA21CG	comp66958_c0	comp66958_c0	-
mdm-miR7122a_2ss4TA21CG	comp50439_c0	comp50439_c0	-
mdm-miR7122a_2ss4TA21CG	comp55142_c0	comp55142_c0	sp|Q9C9R6|PUM7_ARATH Putative pumilio homolog 7, chloroplastic OS=Arabidopsis thaliana GN=APUM7 PE=3 SV=2	GO:0009507(chloroplast);GO:0003729(mRNA binding);GO:0006417(regulation of translation)
mdm-miR7122a_2ss4TA21CG	comp59126_c0	comp59126_c0	-
mdm-miR7122a_2ss4TA21CG	comp60318_c0	comp60318_c0	-
mdm-miR7122a_2ss4TA21CG	comp712779_c0	comp712779_c0	-
mdm-miR7122a_2ss4TA21CG	comp55426_c0	comp55426_c0	sp|Q8W033|AL3I1_ARATH Aldehyde dehydrogenase family 3 member I1, chloroplastic OS=Arabidopsis thaliana GN=ALDH3I1 PE=2 SV=2	GO:0009507(chloroplast);GO:0004029(aldehyde dehydrogenase );GO:0004030(aldehyde dehydrogenase [NAD);GO:0006081(cellular aldehyde metabolic process);GO:0009737(response to abscisic acid stimulus);GO:0009414(response to water deprivation)	ko00010(Glycolysis / Gluconeogenesis);ko00053(Ascorbate and aldarate metabolism);ko00071(Fatty acid metabolism);ko00280(Valine,ko leucine and isoleucine degradation);ko00310(Lysine degradation);ko00330(Arginine and proline metabolism);ko00340(Histidine metabolism);ko00380(Tryptophan metabolism);ko00410(beta-Alanine metabolism);ko00561(Glycerolipid metabolism);ko00620(Pyruvate metabolism);ko00631(…
mdm-miR7122a_2ss4TA21CG	comp62888_c0	comp62888_c0	sp|A8A4K7|GLNE_ECOHS Glutamate-ammonia-ligase adenylyltransferase OS=Escherichia coli O9:H4 (strain HS) GN=glnE PE=3 SV=1	GO:0008882([glutamate-ammonia-ligase] adenylyltransferase activity);GO:0005524(ATP binding)
mdm-miR7122a_2ss4TA21CG	comp48317_c0	comp48317_c0	-
mdm-miR7122a_2ss4TA21CG	comp62633_c0	comp62633_c0	sp|A7ZHA6|NHAA_ECO24 Na(+)/H(+) antiporter NhaA OS=Escherichia coli O139:H28 (strain E24377A / ETEC) GN=nhaA PE=3 SV=1	GO:0016021(integral to membrane);GO:0005886(plasma membrane);GO:0015297(antiporter activity);GO:0006885(regulation of pH);GO:0006814(sodium ion transport)
mdm-miR7122a_2ss4TA21CG	comp59650_c0	comp59650_c0	sp|Q13427|PPIG_HUMAN Peptidyl-prolyl cis-trans isomerase G OS=Homo sapiens GN=PPIG PE=1 SV=2	GO:0016363(nuclear matrix);GO:0016607(nuclear speck);GO:0016018(cyclosporin A binding);GO:0003755(peptidyl-prolyl cis-trans isomerase activity);GO:0006457(protein folding);GO:0008380(RNA splicing)
mdm-miR7122a_2ss4TA21CG	comp67359_c0	comp67359_c0	sp|P42792|CYB_ARATH Cytochrome b OS=Arabidopsis thaliana GN=MT-CYB PE=2 SV=2	GO:0016021(integral to membrane);GO:0005743(mitochondrial inner membrane);GO:0070469(respiratory chain);GO:0009055(electron carrier activity);GO:0046872(metal ion binding);GO:0016491(oxidoreductase activity);GO:0022904(respiratory electron transport chain);GO:0006810(transport)	ko00190(Oxidative phosphorylation);ko04260(Cardiac muscle contraction)
mdm-miR7122a_2ss4TA21CG	comp61263_c0	comp61263_c0	sp|Q9S7I6|RPK2_ARATH LRR receptor-like serine/threonine-protein kinase RPK2 OS=Arabidopsis thaliana GN=RPK2 PE=1 SV=1	GO:0016021(integral to membrane);GO:0005886(plasma membrane);GO:0005524(ATP binding);GO:0004674(protein serine/threonine kinase activity);GO:0004872(receptor activity);GO:0048653(anther development);GO:0048508(embryonic meristem development);GO:0009808(lignin metabolic process);GO:0009942(longitudinal axis specification);GO:0010073(meristem maintenance);GO:0009846(pollen germination);GO:0010152(p…
ghr-MIR7499-p3_2ss10GC17CG	comp36888_c0	comp36888_c0	-
ghr-MIR7499-p3_2ss10GC17CG	comp60436_c0	comp60436_c0	sp|F1SWA0|ZERSY_ZINZE Zerumbone synthase OS=Zingiber zerumbet GN=ZSD1 PE=1 SV=1		ko00906(Carotenoid biosynthesis)
ghr-MIR7499-p3_2ss10GC17CG	comp68478_c0	comp68478_c0	sp|C4ZZN7|MUTS_ECOBW DNA mismatch repair protein MutS OS=Escherichia coli (strain K12 / MC4100 / BW2952) GN=mutS PE=3 SV=1	GO:0005524(ATP binding);GO:0030983(mismatched DNA binding);GO:0006298(mismatch repair)	ko00361(gamma-Hexachlorocyclohexane degradation);ko00363(Bisphenol A degradation);ko00624(1- and 2-Methylnaphthalene degradation);ko00626(Naphthalene and anthracene degradation);ko00632(Benzoate degradation via CoA ligation);ko00903(Limonene and pinene degradation)
ghr-MIR7499-p3_2ss10GC17CG	comp54607_c0	comp54607_c0	sp|Q58DG1|MYG1_BOVIN UPF0160 protein MYG1, mitochondrial OS=Bos taurus PE=2 SV=1	GO:0005739(mitochondrion);GO:0005634(nucleus)
ghr-MIR7499-p3_2ss10GC17CG	comp62728_c0	comp62728_c0	sp|Q9FH57|GATA5_ARATH GATA transcription factor 5 OS=Arabidopsis thaliana GN=GATA5 PE=2 SV=1	GO:0005634(nucleus);GO:0043565(sequence-specific DNA binding);GO:0003700(sequence-specific DNA binding transcription factor activity);GO:0008270(zinc ion binding);GO:0045893(positive regulation of transcription, DNA-dependent)
ghr-MIR7499-p3_2ss10GC17CG	comp48862_c0	comp48862_c0	sp|P86387|PLDA1_CARPA Phospholipase D alpha 1 OS=Carica papaya GN=PLD1 PE=1 SV=1		ko00564(Glycerophospholipid metabolism);ko00565(Ether lipid metabolism);ko04144(Endocytosis);ko04666(Fc gamma R-mediated phagocytosis);ko04912(GnRH signaling pathway)
ghr-MIR7499-p3_2ss10GC17CG	comp40624_c0	comp40624_c0	sp|O65351|SUBL_ARATH Subtilisin-like protease OS=Arabidopsis thaliana GN=ARA12 PE=1 SV=1	GO:0048046(apoplast);GO:0009505(plant-type cell wall);GO:0042802(identical protein binding);GO:0004252(serine-type endopeptidase activity);GO:0080001(mucilage extrusion from seed coat);GO:0048359(mucilage metabolic process involved seed coat development);GO:0043086(negative regulation of catalytic activity);GO:0006508(proteolysis)
ghr-MIR7499-p3_2ss10GC17CG	comp23791_c0	comp23791_c0	-
ghr-MIR7499-p3_2ss10GC17CG	comp68373_c0	comp68373_c0	sp|P0AC86|PHSG_ECOLI Glycogen phosphorylase OS=Escherichia coli (strain K12) GN=glgP PE=3 SV=1	GO:0005737(cytoplasm);GO:0008184(glycogen phosphorylase activity);GO:0030170(pyridoxal phosphate binding);GO:0005980(glycogen catabolic process)	ko00500(Starch and sucrose metabolism);ko04910(Insulin signaling pathway)
ghr-MIR7499-p3_2ss10GC17CG	comp67297_c0	comp67297_c0	sp|P39452|RIR3_ECOLI Ribonucleoside-diphosphate reductase 2 subunit alpha OS=Escherichia coli (strain K12) GN=nrdE PE=3 SV=3	GO:0005971(ribonucleoside-diphosphate reductase complex);GO:0005524(ATP binding);GO:0004748(ribonucleoside-diphosphate reductase activity);GO:0006260(DNA replication)	ko00020(Citrate cycle );ko00720(Reductive carboxylate cycle )
ghr-MIR7499-p3_2ss10GC17CG	comp67154_c0	comp67154_c0	sp|P30131|HYPF_ECOLI Carbamoyltransferase HypF OS=Escherichia coli (strain K12) GN=hypF PE=1 SV=2	GO:0016743(carboxyl- or carbamoyltransferase activity);GO:0008270(zinc ion binding);GO:0046944(protein carbamoylation);GO:0051604(protein maturation)
ghr-MIR7499-p3_2ss10GC17CG	comp62889_c0	comp62889_c0	sp|P06864|BGA2_ECOLI Evolved beta-galactosidase subunit alpha OS=Escherichia coli (strain K12) GN=ebgA PE=1 SV=4	GO:0009341(beta-galactosidase complex);GO:0004565(beta-galactosidase activity);GO:0030246(carbohydrate binding);GO:0043169(cation binding);GO:0005975(carbohydrate metabolic process)	ko00052(Galactose metabolism);ko00511(Other glycan degradation);ko00600(Sphingolipid metabolism)
ghr-MIR7499-p3_2ss10GC17CG	comp67867_c0	comp67867_c0	sp|P16916|RHSA_ECOLI Protein RhsA OS=Escherichia coli (strain K12) GN=rhsA PE=3 SV=1
ghr-MIR7499-p3_2ss10GC17CG	comp67572_c0	comp67572_c0	sp|Q94AI7|TPL_ARATH Protein TOPLESS OS=Arabidopsis thaliana GN=TPL PE=1 SV=1	GO:0005829(cytosol);GO:0005634(nucleus);GO:0042803(protein homodimerization activity);GO:0009867(jasmonic acid mediated signaling pathway);GO:0045892(negative regulation of transcription, DNA-dependent);GO:0010072(primary shoot apical meristem specification);GO:0009733(response to auxin stimulus);GO:0006351(transcription, DNA-dependent);GO:0010051(xylem and phloem pattern formation)	ko00760(Nicotinate and nicotinamide metabolism)
ghr-MIR7499-p3_2ss10GC17CG	comp31250_c0	comp31250_c0	-
ghr-MIR7499-p3_2ss10GC17CG	comp629283_c0	comp629283_c0	-
ghr-MIR7499-p3_2ss10GC17CG	comp446216_c0	comp446216_c0	-
ghr-MIR7499-p3_2ss10GC17CG	comp59476_c0	comp59476_c0	sp|Q9LTX3|PPOX1_ARATH Pyridoxine/pyridoxamine 5'-phosphate oxidase 1, chloroplastic OS=Arabidopsis thaliana GN=PPOX1 PE=1 SV=1
ghr-MIR7499-p3_2ss10GC17CG	comp50096_c0	comp50096_c0	-
ghr-MIR7499-p3_2ss10GC17CG	comp59420_c0	comp59420_c0	-
ghr-MIR7499-p3_2ss10GC17CG	comp68413_c0	comp68413_c0	sp|P14294|TOP3_ECOLI DNA topoisomerase 3 OS=Escherichia coli (strain K12) GN=topB PE=1 SV=1	GO:0005694(chromosome);GO:0005524(ATP binding);GO:0003917(DNA topoisomerase type I activity);GO:0006265(DNA topological change)	ko00010(Glycolysis / Gluconeogenesis)
ghr-MIR7499-p3_2ss10GC17CG	comp68509_c0	comp68509_c0	sp|P76272|YEBT_ECOLI Uncharacterized protein YebT OS=Escherichia coli (strain K12) GN=yebT PE=3 SV=2	GO:0016021(integral to membrane)
ghr-MIR7499-p3_2ss10GC17CG	comp68524_c0	comp68524_c0	sp|P75793|PFLF_ECOLI Putative formate acetyltransferase 3 OS=Escherichia coli (strain K12) GN=ybiW PE=3 SV=1	GO:0005737(cytoplasm);GO:0008861(formate C-acetyltransferase activity);GO:0006006(glucose metabolic process)	ko00250(Alanine,ko aspartate and glutamate metabolism);ko00460(Cyanoamino acid metabolism);ko00910(Nitrogen metabolism)
ghr-MIR7499-p3_2ss10GC17CG	comp68338_c0	comp68338_c0	sp|P0AC86|PHSG_ECOLI Glycogen phosphorylase OS=Escherichia coli (strain K12) GN=glgP PE=3 SV=1	GO:0005737(cytoplasm);GO:0008184(glycogen phosphorylase activity);GO:0030170(pyridoxal phosphate binding);GO:0005980(glycogen catabolic process)	ko00500(Starch and sucrose metabolism);ko04910(Insulin signaling pathway)
ghr-MIR7499-p3_2ss10GC17CG	comp50372_c0	comp50372_c0	sp|Q8L785|SYGM2_ARATH Glycine--tRNA ligase 2, chloroplastic/mitochondrial OS=Arabidopsis thaliana GN=GLYRS-2 PE=2 SV=1	GO:0009570(chloroplast stroma);GO:0005739(mitochondrion);GO:0005524(ATP binding);GO:0004820(glycine-tRNA ligase activity);GO:0046983(protein dimerization activity);GO:0009793(embryo development ending in seed dormancy);GO:0006426(glycyl-tRNA aminoacylation);GO:0045995(regulation of embryonic development)	ko00970(Aminoacyl-tRNA biosynthesis)
ghr-MIR7499-p3_2ss10GC17CG	comp45241_c0	comp45241_c0	-
ghr-MIR7499-p3_2ss10GC17CG	comp68371_c0	comp68371_c0	sp|P46474|YHDP_ECOLI Uncharacterized protein YhdP OS=Escherichia coli (strain K12) GN=yhdP PE=4 SV=4		ko00280(Valine,ko leucine and isoleucine degradation)
ghr-MIR7499-p3_2ss10GC17CG	comp68495_c0	comp68495_c0	sp|P63285|CLPB_ECO57 Chaperone protein ClpB OS=Escherichia coli O157:H7 GN=clpB PE=3 SV=1	GO:0005737(cytoplasm);GO:0005524(ATP binding);GO:0017111(nucleoside-triphosphatase activity);GO:0016485(protein processing);GO:0009408(response to heat)
ghr-MIR7499-p3_2ss10GC17CG	comp58854_c0	comp58854_c0	sp|Q9LES3|AI5L2_ARATH ABSCISIC ACID-INSENSITIVE 5-like protein 2 OS=Arabidopsis thaliana GN=DPBF3 PE=1 SV=1	GO:0005634(nucleus);GO:0046983(protein dimerization activity);GO:0043565(sequence-specific DNA binding);GO:0003700(sequence-specific DNA binding transcription factor activity);GO:0009738(abscisic acid mediated signaling pathway)
ghr-MIR7499-p3_2ss10GC17CG	comp62535_c0	comp62535_c0	sp|Q40478|ERF5_TOBAC Ethylene-responsive transcription factor 5 OS=Nicotiana tabacum GN=ERF5 PE=2 SV=1	GO:0005634(nucleus);GO:0003677(DNA binding);GO:0003700(sequence-specific DNA binding transcription factor activity);GO:0006952(defense response);GO:0009873(ethylene mediated signaling pathway)
ghr-MIR7499-p3_2ss10GC17CG	comp67986_c0	comp67986_c0	sp|Q0WPQ2|ETR2_ARATH Ethylene receptor 2 OS=Arabidopsis thaliana GN=ETR2 PE=1 SV=2	GO:0005789(endoplasmic reticulum membrane);GO:0016021(integral to membrane);GO:0005524(ATP binding);GO:0051740(ethylene binding);GO:0046872(metal ion binding);GO:0005515(protein binding);GO:0004674(protein serine/threonine kinase activity);GO:0004872(receptor activity);GO:0000156(two-component response regulator activity);GO:0000155(two-component sensor activity);GO:0009873(ethylene mediated sign…
ghr-MIR7499-p3_2ss10GC17CG	comp64197_c0	comp64197_c0	sp|P36683|ACON2_ECOLI Aconitate hydratase 2 OS=Escherichia coli (strain K12) GN=acnB PE=1 SV=3	GO:0047456(2-methylisocitrate dehydratase activity);GO:0051539(4 iron, 4 sulfur cluster binding);GO:0003994(aconitate hydratase activity);GO:0052632(citrate hydro-lyase );GO:0052633(isocitrate hydro-lyase );GO:0046872(metal ion binding);GO:0003730(mRNA 3'-UTR binding);GO:0019629(propionate catabolic process, 2-methylcitrate cycle);GO:0006417(regulation of translation);GO:0006099(tricarboxylic aci…	ko00020(Citrate cycle );ko00630(Glyoxylate and dicarboxylate metabolism);ko00720(Reductive carboxylate cycle )
ghr-MIR7499-p3_2ss10GC17CG	comp49724_c0	comp49724_c0	sp|B7N242|MTLD_ECO81 Mannitol-1-phosphate 5-dehydrogenase OS=Escherichia coli O81 (strain ED1a) GN=mtlD PE=3 SV=1	GO:0050662(coenzyme binding);GO:0008926(mannitol-1-phosphate 5-dehydrogenase activity)
ghr-MIR7499-p3_2ss10GC17CG	comp18181_c0	comp18181_c0	-
ghr-MIR7499-p3_2ss10GC17CG	comp41843_c0	comp41843_c0	sp|O48646|GPX6_ARATH Probable phospholipid hydroperoxide glutathione peroxidase 6, mitochondrial OS=Arabidopsis thaliana GN=GPX6 PE=2 SV=2	GO:0009507(chloroplast);GO:0005829(cytosol);GO:0005739(mitochondrion);GO:0005886(plasma membrane);GO:0004602(glutathione peroxidase activity);GO:0047066(phospholipid-hydroperoxide glutathione peroxidase activity);GO:0046686(response to cadmium ion);GO:0006979(response to oxidative stress);GO:0009651(response to salt stress)	ko00480(Glutathione metabolism);ko00590(Arachidonic acid metabolism)
ghr-MIR7499-p3_2ss10GC17CG	comp58497_c0	comp58497_c0	sp|Q8LDI5|CXXS1_ARATH Thioredoxin-like protein CXXS1 OS=Arabidopsis thaliana GN=CXXS1 PE=2 SV=2	GO:0005829(cytosol);GO:0009055(electron carrier activity);GO:0003756(protein disulfide isomerase activity);GO:0015035(protein disulfide oxidoreductase activity);GO:0045454(cell redox homeostasis);GO:0006662(glycerol ether metabolic process);GO:0006467(protein thiol-disulfide exchange)
ghr-MIR7499-p3_2ss10GC17CG	comp68525_c0	comp68525_c0	sp|P30855|EVGS_ECOLI Sensor protein EvgS OS=Escherichia coli (strain K12) GN=evgS PE=1 SV=2	GO:0016021(integral to membrane);GO:0030288(outer membrane-bounded periplasmic space);GO:0005886(plasma membrane);GO:0005524(ATP binding);GO:0005215(transporter activity);GO:0000156(two-component response regulator activity);GO:0000155(two-component sensor activity);GO:0018106(peptidyl-histidine phosphorylation);GO:0006355(regulation of transcription, DNA-dependent)
ghr-MIR7499-p3_2ss10GC17CG	comp64930_c0	comp64930_c0	sp|Q9LHF1|LRX4_ARATH Leucine-rich repeat extensin-like protein 4 OS=Arabidopsis thaliana GN=LRX4 PE=1 SV=1	GO:0005576(extracellular region);GO:0009505(plant-type cell wall);GO:0009506(plasmodesma);GO:0007047(cellular cell wall organization)
ghr-MIR7499-p3_2ss10GC17CG	comp473559_c0	comp473559_c0	-
ghr-MIR7499-p3_2ss10GC17CG	comp37791_c0	comp37791_c0	-
ghr-MIR7499-p3_2ss10GC17CG	comp66377_c1	comp66377_c1	sp|P33224|AIDB_ECOLI Putative acyl-CoA dehydrogenase AidB OS=Escherichia coli (strain K12) GN=aidB PE=1 SV=3	GO:0005737(cytoplasm);GO:0008470(isovaleryl-CoA dehydrogenase activity);GO:0043565(sequence-specific DNA binding);GO:0033554(cellular response to stress)	ko00061(Fatty acid biosynthesis);ko01040(Biosynthesis of unsaturated fatty acids)
ghr-MIR7499-p3_2ss10GC17CG	comp52083_c0	comp52083_c0	-
ghr-MIR7499-p3_2ss10GC17CG	comp68259_c0	comp68259_c0	sp|P43329|HRPA_ECOLI ATP-dependent RNA helicase HrpA OS=Escherichia coli (strain K12) GN=hrpA PE=3 SV=3	GO:0005524(ATP binding);GO:0008026(ATP-dependent helicase activity);GO:0003676(nucleic acid binding);GO:0006397(mRNA processing)	ko00230(Purine metabolism)
ghr-MIR7499-p3_2ss10GC17CG	comp593232_c0	comp593232_c0	-
ghr-MIR7499-p3_2ss10GC17CG	comp68542_c0	comp68542_c0	sp|P04825|AMPN_ECOLI Aminopeptidase N OS=Escherichia coli (strain K12) GN=pepN PE=1 SV=2	GO:0005886(plasma membrane);GO:0004177(aminopeptidase activity);GO:0008237(metallopeptidase activity);GO:0008270(zinc ion binding);GO:0006508(proteolysis)	ko00480(Glutathione metabolism)
ghr-MIR7499-p3_2ss10GC17CG	comp53353_c0	comp53353_c0	-
ghr-MIR7499-p3_2ss10GC17CG	comp68276_c0	comp68276_c0	sp|P0A9Q8|ADHE_ECO57 Aldehyde-alcohol dehydrogenase OS=Escherichia coli O157:H7 GN=adhE PE=3 SV=2	GO:0008774(acetaldehyde dehydrogenase );GO:0004022(alcohol dehydrogenase );GO:0046872(metal ion binding);GO:0006066(alcohol metabolic process);GO:0015976(carbon utilization)
ghr-MIR7499-p3_2ss10GC17CG	comp48515_c1	comp48515_c1	-
ghr-MIR7499-p3_2ss10GC17CG	comp68141_c0	comp68141_c0	sp|P71229|HYFR_ECOLI Hydrogenase-4 transcriptional activator OS=Escherichia coli (strain K12) GN=hyfR PE=4 SV=1	GO:0005622(intracellular);GO:0005524(ATP binding);GO:0003677(DNA binding);GO:0017111(nucleoside-triphosphatase activity);GO:0003700(sequence-specific DNA binding transcription factor activity);GO:0008134(transcription factor binding);GO:0000160(two-component signal transduction system )	ko00190(Oxidative phosphorylation)
ghr-MIR7499-p3_2ss10GC17CG	comp57356_c0	comp57356_c0	-
ghr-MIR7499-p3_2ss10GC17CG	comp67059_c0	comp67059_c0	sp|P45537|YHFK_ECOLI Uncharacterized protein YhfK OS=Escherichia coli (strain K12) GN=yhfK PE=3 SV=2	GO:0016021(integral to membrane);GO:0005886(plasma membrane);GO:0006810(transport)
ghr-MIR7499-p3_2ss10GC17CG	comp24090_c0	comp24090_c0	sp|Q93Y01|UBP9_ARATH Ubiquitin carboxyl-terminal hydrolase 9 OS=Arabidopsis thaliana GN=UBP9 PE=2 SV=1	GO:0008234(cysteine-type peptidase activity);GO:0004221(ubiquitin thiolesterase activity);GO:0006511(ubiquitin-dependent protein catabolic process)
ghr-MIR7499-p3_2ss10GC17CG	comp67223_c0	comp67223_c0	sp|Q93ZL5|CDF2_ARATH Cyclic dof factor 2 OS=Arabidopsis thaliana GN=CDF2 PE=1 SV=2	GO:0005634(nucleus);GO:0003677(DNA binding);GO:0005515(protein binding);GO:0008270(zinc ion binding);GO:0006355(regulation of transcription, DNA-dependent);GO:0006351(transcription, DNA-dependent)
ghr-MIR7499-p3_2ss10GC17CG	comp48898_c0	comp48898_c0	-
ghr-MIR7499-p3_2ss10GC17CG	comp64577_c0	comp64577_c0	sp|P0ABD0|BETT_ECO57 High-affinity choline transport protein OS=Escherichia coli O157:H7 GN=betT PE=3 SV=1	GO:0016021(integral to membrane);GO:0005886(plasma membrane);GO:0005215(transporter activity);GO:0006950(response to stress)	ko00010(Glycolysis / Gluconeogenesis);ko00053(Ascorbate and aldarate metabolism);ko00071(Fatty acid metabolism);ko00280(Valine,ko leucine and isoleucine degradation);ko00310(Lysine degradation);ko00330(Arginine and proline metabolism);ko00340(Histidine metabolism);ko00380(Tryptophan metabolism);ko00410(beta-Alanine metabolism);ko00561(Glycerolipid metabolism);ko00620(Pyruvate metabolism);ko00631(…
ghr-MIR7499-p3_2ss10GC17CG	comp67705_c0	comp67705_c0	-		ko00561(Glycerolipid metabolism)
ghr-MIR7499-p3_2ss10GC17CG	comp62684_c0	comp62684_c0	sp|P37617|ATZN_ECOLI Lead, cadmium, zinc and mercury-transporting ATPase OS=Escherichia coli (strain K12) GN=zntA PE=1 SV=1	GO:0016021(integral to membrane);GO:0005886(plasma membrane);GO:0005524(ATP binding);GO:0008551(cadmium-exporting ATPase activity);GO:0046872(metal ion binding);GO:0016463(zinc-exporting ATPase activity);GO:0006754(ATP biosynthetic process);GO:0010312(detoxification of zinc ion);GO:0046686(response to cadmium ion)
ghr-MIR7499-p3_2ss10GC17CG	comp62397_c0	comp62397_c0	sp|F4K2A1|FPGS1_ARATH Folylpolyglutamate synthase OS=Arabidopsis thaliana GN=FPGS1 PE=1 SV=1		ko00790(Folate biosynthesis)
ghr-MIR7499-p3_2ss10GC17CG	comp63011_c0	comp63011_c0	sp|P75780|FIU_ECOLI Catecholate siderophore receptor Fiu OS=Escherichia coli (strain K12) GN=fiu PE=1 SV=1	GO:0009279(cell outer membrane);GO:0016021(integral to membrane);GO:0005886(plasma membrane);GO:0005506(iron ion binding);GO:0004872(receptor activity);GO:0015343(siderophore transmembrane transporter activity);GO:0042884(microcin transport)
ghr-MIR7499-p3_2ss10GC17CG	comp66421_c0	comp66421_c0	sp|Q9M8J3|FRS7_ARATH Protein FAR1-RELATED SEQUENCE 7 OS=Arabidopsis thaliana GN=FRS7 PE=2 SV=1	GO:0005634(nucleus);GO:0008270(zinc ion binding)
ghr-MIR7499-p3_2ss10GC17CG	comp54462_c0	comp54462_c0	sp|Q9LU93|MAD2_ARATH Mitotic spindle checkpoint protein MAD2 OS=Arabidopsis thaliana GN=MAD2 PE=2 SV=1	GO:0010369(chromocenter);GO:0000776(kinetochore);GO:0005634(nucleus);GO:0051301(cell division);GO:0007067(mitosis);GO:0007094(mitotic cell cycle spindle assembly checkpoint)	ko04110(Cell cycle);ko04114(Oocyte meiosis);ko04914(Progesterone-mediated oocyte maturation)
ghr-MIR7499-p3_2ss10GC17CG	comp57476_c0	comp57476_c0	-
ghr-MIR7499-p3_2ss10GC17CG	comp66377_c1	comp66377_c1	sp|P33224|AIDB_ECOLI Putative acyl-CoA dehydrogenase AidB OS=Escherichia coli (strain K12) GN=aidB PE=1 SV=3	GO:0005737(cytoplasm);GO:0008470(isovaleryl-CoA dehydrogenase activity);GO:0043565(sequence-specific DNA binding);GO:0033554(cellular response to stress)	ko00061(Fatty acid biosynthesis);ko01040(Biosynthesis of unsaturated fatty acids)
ghr-MIR7499-p3_2ss10GC17CG	comp34122_c0	comp34122_c0	-
ghr-MIR7499-p3_2ss10GC17CG	comp54631_c0	comp54631_c0	-
ghr-MIR7499-p3_2ss10GC17CG	comp46523_c0	comp46523_c0	-
ghr-MIR7499-p3_2ss10GC17CG	comp50851_c0	comp50851_c0	-
ghr-MIR7499-p3_2ss10GC17CG	comp56967_c0	comp56967_c0	-
ghr-MIR7499-p3_2ss10GC17CG	comp595786_c0	comp595786_c0	sp|Q9FJL0|SMC4_ARATH Structural maintenance of chromosomes protein 4 OS=Arabidopsis thaliana GN=SMC4 PE=2 SV=1	GO:0005694(chromosome);GO:0005634(nucleus);GO:0005524(ATP binding);GO:0051301(cell division);GO:0030261(chromosome condensation);GO:0007126(meiosis);GO:0007067(mitosis)
ghr-MIR7499-p3_2ss10GC17CG	comp51410_c0	comp51410_c0	-
ghr-MIR7499-p3_2ss10GC17CG	comp27629_c0	comp27629_c0	-
ghr-MIR7499-p3_2ss10GC17CG	comp68541_c0	comp68541_c0	sp|Q8XCX2|NUOG_ECO57 NADH-quinone oxidoreductase subunit G OS=Escherichia coli O157:H7 GN=nuoG PE=3 SV=3	GO:0016020(membrane);GO:0051537(2 iron, 2 sulfur cluster binding);GO:0051539(4 iron, 4 sulfur cluster binding);GO:0009055(electron carrier activity);GO:0030151(molybdenum ion binding);GO:0008137(NADH dehydrogenase );GO:0048038(quinone binding);GO:0042773(ATP synthesis coupled electron transport)	ko00130(Ubiquinone and other terpenoid-quinone biosynthesis)
ghr-MIR7499-p3_2ss10GC17CG	comp67438_c0	comp67438_c0	-
ghr-MIR7499-p3_2ss10GC17CG	comp68551_c0	comp68551_c0	sp|P0A9Q8|ADHE_ECO57 Aldehyde-alcohol dehydrogenase OS=Escherichia coli O157:H7 GN=adhE PE=3 SV=2	GO:0008774(acetaldehyde dehydrogenase );GO:0004022(alcohol dehydrogenase );GO:0046872(metal ion binding);GO:0006066(alcohol metabolic process);GO:0015976(carbon utilization)	ko04626(Plant-pathogen interaction)
ghr-MIR7499-p3_2ss10GC17CG	comp257498_c0	comp257498_c0	-
ghr-MIR7499-p3_2ss10GC17CG	comp53161_c0	comp53161_c0	-
ghr-MIR7499-p3_2ss10GC17CG	comp29904_c0	comp29904_c0	-
ghr-MIR7499-p3_2ss10GC17CG	comp391280_c0	comp391280_c0	-
ghr-MIR7499-p3_2ss10GC17CG	comp27407_c0	comp27407_c0	-
ghr-MIR7499-p3_2ss10GC17CG	comp232824_c0	comp232824_c0	-
ghr-MIR7499-p3_2ss10GC17CG	comp496269_c0	comp496269_c0	-
ghr-MIR7499-p3_2ss10GC17CG	comp59991_c0	comp59991_c0	-
ghr-MIR7499-p3_2ss10GC17CG	comp68464_c0	comp68464_c0	sp|P46923|TORZ_ECOLI Trimethylamine-N-oxide reductase 2 OS=Escherichia coli (strain K12) GN=torZ PE=1 SV=2	GO:0016020(membrane);GO:0042597(periplasmic space);GO:0009055(electron carrier activity);GO:0030151(molybdenum ion binding);GO:0050626(trimethylamine-N-oxide reductase );GO:0045333(cellular respiration)	ko00970(Aminoacyl-tRNA biosynthesis)
ghr-MIR7499-p3_2ss10GC17CG	comp68108_c0	comp68108_c0	sp|B1IW07|MUKB_ECOLC Chromosome partition protein MukB OS=Escherichia coli (strain ATCC 8739 / DSM 1576 / Crooks) GN=mukB PE=3 SV=1	GO:0005737(cytoplasm);GO:0009295(nucleoid);GO:0005524(ATP binding);GO:0003677(DNA binding);GO:0007049(cell cycle);GO:0051301(cell division);GO:0030261(chromosome condensation);GO:0007059(chromosome segregation)	ko00620(Pyruvate metabolism);ko00640(Propanoate metabolism);ko00650(Butanoate metabolism)
ghr-MIR7499-p3_2ss10GC17CG	comp63463_c0	comp63463_c0	sp|Q93ZC9|GLAK1_ARATH Glucuronokinase 1 OS=Arabidopsis thaliana GN=GLCAK1 PE=1 SV=1	GO:0005829(cytosol);GO:0005524(ATP binding);GO:0047940(glucuronokinase activity);GO:0046872(metal ion binding);GO:0008266(poly);GO:0042546(cell wall biogenesis);GO:0006020(inositol metabolic process);GO:0048868(pollen tube development)
ghr-MIR7499-p3_2ss10GC17CG	comp59343_c0	comp59343_c0	sp|Q6EU49|WNK4_ORYSJ Probable serine/threonine-protein kinase WNK4 OS=Oryza sativa subsp. japonica GN=WNK4 PE=2 SV=1	GO:0005524(ATP binding);GO:0004674(protein serine/threonine kinase activity)	ko04712(Circadian rhythm - plant)
ghr-MIR7499-p3_2ss10GC17CG	comp68476_c0	comp68476_c0	sp|C4ZVX0|MALT_ECOBW HTH-type transcriptional regulator MalT OS=Escherichia coli (strain K12 / MC4100 / BW2952) GN=malT PE=3 SV=1	GO:0005622(intracellular);GO:0005524(ATP binding);GO:0043565(sequence-specific DNA binding);GO:0003700(sequence-specific DNA binding transcription factor activity);GO:0000156(two-component response regulator activity);GO:0005975(carbohydrate metabolic process)	ko00030(Pentose phosphate pathway);ko00710(Carbon fixation in photosynthetic organisms);ko01051(Biosynthesis of ansamycins)
ghr-MIR7499-p3_2ss10GC17CG	comp68298_c0	comp68298_c0	sp|Q8FBM1|METE_ECOL6 5-methyltetrahydropteroyltriglutamate--homocysteine methyltransferase OS=Escherichia coli O6:H1 (strain CFT073 / ATCC 700928 / UPEC) GN=metE PE=3 SV=3	GO:0003871(5-methyltetrahydropteroyltriglutamate-homocysteine S-methyltransferase activity);GO:0008270(zinc ion binding);GO:0009086(methionine biosynthetic process)	ko00270(Cysteine and methionine metabolism)
ghr-MIR7499-p3_2ss10GC17CG	comp47575_c0	comp47575_c0	-
ghr-MIR7499-p3_2ss10GC17CG	comp49352_c0	comp49352_c0	-
ghr-MIR7499-p3_2ss10GC17CG	comp61008_c0	comp61008_c0	-
ghr-MIR7499-p3_2ss10GC17CG	comp46269_c0	comp46269_c0	sp|Q9SRK7|AZG1_ARATH Adenine/guanine permease AZG1 OS=Arabidopsis thaliana GN=AZG1 PE=2 SV=1	GO:0016021(integral to membrane);GO:0005345(purine base transmembrane transporter activity);GO:0015853(adenine transport);GO:0015854(guanine transport)
ghr-MIR7499-p3_2ss10GC17CG	comp65510_c0	comp65510_c0	sp|Q945K7|IDH5_ARATH Isocitrate dehydrogenase [NAD] catalytic subunit 5, mitochondrial OS=Arabidopsis thaliana GN=IDH5 PE=1 SV=1	GO:0009507(chloroplast);GO:0005739(mitochondrion);GO:0005524(ATP binding);GO:0004449(isocitrate dehydrogenase );GO:0000287(magnesium ion binding);GO:0051287(NAD binding);GO:0008270(zinc ion binding);GO:0006102(isocitrate metabolic process);GO:0006099(tricarboxylic acid cycle)	ko00020(Citrate cycle )
ghr-MIR7499-p3_2ss10GC17CG	comp18114_c0	comp18114_c0	sp|Q8RWC9|CIPK1_ARATH CBL-interacting serine/threonine-protein kinase 1 OS=Arabidopsis thaliana GN=CIPK1 PE=1 SV=2	GO:0005886(plasma membrane);GO:0005524(ATP binding);GO:0005515(protein binding);GO:0004674(protein serine/threonine kinase activity);GO:0009737(response to abscisic acid stimulus);GO:0009651(response to salt stress);GO:0007165(signal transduction)
[truncated: 31,420 more rows]
