# Supplementary material for: Identification of miRNA–mRNA Regulatory Modules Involved in Lipid Metabolism and Seed Development in a Woody Oil Tree (Camellia oleifera)
Source: Cells. 2021 Dec 27;11(1):71. doi: 10.3390/cells11010071 (PMC8750442; doi:10.3390/cells11010071)
Supplement: Supplementary file 1 [file cells-11-00071-s001.zip › Table S12.xlsx]

## Sheet: GO_significant
	Table S12. Analysis of the target genes by GO significant enrichment
GO Id	Function	GO_term	gene number	Pvalue of Fisher's Exact Test
GO:0009279	cellular_component	cell outer membrane	30	0.000335084
GO:0009867	biological_process	jasmonic acid mediated signaling pathway	22	0.000354706
GO:0005634	cellular_component	nucleus	1204	0.000685826
GO:0009061	biological_process	anaerobic respiration	15	0.00130412
GO:0019867	cellular_component	outer membrane	7	0.00145164
GO:0045333	biological_process	cellular respiration	7	0.00145164
GO:0006351	biological_process	transcription, DNA-templated	459	0.00300471
GO:0016126	biological_process	sterol biosynthetic process	16	0.00322454
GO:0009055	molecular_function	electron carrier activity	187	0.00348472
GO:0043565	molecular_function	sequence-specific DNA binding	170	0.00452222
GO:0009736	biological_process	cytokinin-activated signaling pathway	28	0.00587517
GO:0008237	molecular_function	metallopeptidase activity	16	0.00615765
GO:0005215	molecular_function	transporter activity	77	0.00670589
GO:0046983	molecular_function	protein dimerization activity	79	0.00733746
GO:0016463	molecular_function	zinc-exporting ATPase activity	7	0.00761966
GO:0019773	cellular_component	proteasome core complex, alpha-subunit complex	7	0.00761966
GO:0008551	molecular_function	cadmium-exporting ATPase activity	7	0.00761966
GO:0009536	cellular_component	plastid	11	0.00802916
GO:0002237	biological_process	response to molecule of bacterial origin	11	0.00802916
GO:0010120	biological_process	camalexin biosynthetic process	5	0.00939626
GO:0008878	molecular_function	glucose-1-phosphate adenylyltransferase activity	5	0.00939626
GO:2000037	biological_process	regulation of stomatal complex patterning	5	0.00939626
GO:0019509	biological_process	L-methionine biosynthetic process from methylthioadenosine	5	0.00939626
GO:0005770	cellular_component	late endosome	5	0.00939626
GO:0005765	cellular_component	lysosomal membrane	14	0.0103268
GO:0004177	molecular_function	aminopeptidase activity	21	0.0105998
GO:0008121	molecular_function	ubiquinol-cytochrome-c reductase activity	8	0.0109087
GO:0003700	molecular_function	sequence-specific DNA binding transcription factor activity	248	0.0113155
GO:0008270	molecular_function	zinc ion binding	526	0.0120403
GO:0045335	cellular_component	phagocytic vesicle	10	0.0152988
GO:0006457	biological_process	protein folding	90	0.0166409
GO:0016810	molecular_function	hydrolase activity, acting on carbon-nitrogen (but not peptide) bonds	6	0.017144
GO:0016661	molecular_function	oxidoreductase activity, acting on other nitrogenous compounds as donors	6	0.017144
GO:0010189	biological_process	vitamin E biosynthetic process	6	0.017144
GO:0016573	biological_process	histone acetylation	6	0.017144
GO:0004412	molecular_function	homoserine dehydrogenase activity	6	0.017144
GO:0006974	biological_process	cellular response to DNA damage stimulus	6	0.017144
GO:0005689	cellular_component	U12-type spliceosomal complex	6	0.017144
GO:0042545	biological_process	cell wall modification	23	0.0217332
GO:0018279	biological_process	protein N-linked glycosylation via asparagine	7	0.022595
GO:0007243	biological_process	intracellular protein kinase cascade	7	0.022595
GO:0051555	biological_process	flavonol biosynthetic process	7	0.022595
GO:0030010	biological_process	establishment of cell polarity	7	0.022595
GO:0016602	cellular_component	CCAAT-binding factor complex	7	0.022595
GO:0003676	molecular_function	nucleic acid binding	101	0.0232925
GO:0006355	biological_process	regulation of transcription, DNA-templated	470	0.0233635
GO:0003962	molecular_function	cystathionine gamma-synthase activity	4	0.0239025
GO:0009436	biological_process	glyoxylate catabolic process	4	0.0239025
GO:0005787	cellular_component	signal peptidase complex	4	0.0239025
GO:0050790	biological_process	regulation of catalytic activity	4	0.0239025
GO:0005083	molecular_function	small GTPase regulator activity	4	0.0239025
GO:0051179	biological_process	localization	4	0.0239025
GO:0033843	molecular_function	xyloglucan 6-xylosyltransferase activity	4	0.0239025
GO:0046847	biological_process	filopodium assembly	4	0.0239025
GO:0008706	molecular_function	6-phospho-beta-glucosidase activity	4	0.0239025
GO:0009090	biological_process	homoserine biosynthetic process	4	0.0239025
GO:0009239	biological_process	enterobactin biosynthetic process	4	0.0239025
GO:0006014	biological_process	D-ribose metabolic process	4	0.0239025
GO:0030479	cellular_component	actin cortical patch	4	0.0239025
GO:0006517	biological_process	protein deglycosylation	4	0.0239025
GO:0048730	biological_process	epidermis morphogenesis	4	0.0239025
GO:0010608	biological_process	posttranscriptional regulation of gene expression	4	0.0239025
GO:0005337	molecular_function	nucleoside transmembrane transporter activity	4	0.0239025
GO:0010629	biological_process	negative regulation of gene expression	4	0.0239025
GO:0050626	molecular_function	trimethylamine-N-oxide reductase (cytochrome c) activity	4	0.0239025
GO:0004747	molecular_function	ribokinase activity	4	0.0239025
GO:0047100	molecular_function	glyceraldehyde-3-phosphate dehydrogenase (NADP+) (phosphorylating) activity	4	0.0239025
GO:0008865	molecular_function	fructokinase activity	4	0.0239025
GO:0030151	molecular_function	molybdenum ion binding	19	0.0256667
GO:0042597	cellular_component	periplasmic space	16	0.0284567
GO:0004366	molecular_function	glycerol-3-phosphate O-acyltransferase activity	9	0.0285101
GO:0009835	biological_process	fruit ripening	13	0.0303918
GO:0009789	biological_process	positive regulation of abscisic acid-activated signaling pathway	13	0.0303918
GO:0045330	molecular_function	aspartyl esterase activity	22	0.0320414
GO:0045893	biological_process	positive regulation of transcription, DNA-templated	71	0.0322167
GO:0009738	biological_process	abscisic acid-activated signaling pathway	70	0.0339357
GO:0006470	biological_process	protein dephosphorylation	35	0.0355819
GO:0051219	molecular_function	phosphoprotein binding	5	0.0379106
GO:0012501	biological_process	programmed cell death	5	0.0379106
GO:0006552	biological_process	leucine catabolic process	5	0.0379106
GO:0019629	biological_process	propionate catabolic process, 2-methylcitrate cycle	5	0.0379106
GO:0008242	molecular_function	omega peptidase activity	5	0.0379106
GO:0009001	molecular_function	serine O-acetyltransferase activity	5	0.0379106
GO:0008967	molecular_function	phosphoglycolate phosphatase activity	5	0.0379106
GO:0009820	biological_process	alkaloid metabolic process	18	0.0389022
GO:0006914	biological_process	autophagy	17	0.0407325
GO:0051082	molecular_function	unfolded protein binding	59	0.0438935
GO:0009637	biological_process	response to blue light	15	0.0444334
GO:0040010	biological_process	positive regulation of growth rate	6	0.045717
GO:0019789	molecular_function	SUMO transferase activity	6	0.045717
GO:0051693	biological_process	actin filament capping	6	0.045717
GO:0050616	molecular_function	secologanin synthase activity	6	0.045717
GO:0043687	biological_process	post-translational protein modification	6	0.045717
GO:0015343	molecular_function	siderophore transmembrane transporter activity	6	0.045717
GO:0010038	biological_process	response to metal ion	6	0.045717
GO:0009509	cellular_component	chromoplast	6	0.045717
GO:0016363	cellular_component	nuclear matrix	14	0.0462491
GO:0004527	molecular_function	exonuclease activity	14	0.0462491
GO:0016192	biological_process	vesicle-mediated transport	58	0.046304
GO:0006006	biological_process	glucose metabolic process	13	0.0479852
GO:0008299	biological_process	isoprenoid biosynthetic process	13	0.0479852
GO:0006807	biological_process	nitrogen compound metabolic process	13	0.0479852
GO:0005747	cellular_component	mitochondrial respiratory chain complex I	12	0.0495762
GO:0016616	molecular_function	oxidoreductase activity, acting on the CH-OH group of donors, NAD or NADP as acceptor	7	0.0498631
GO:0043680	cellular_component	filiform apparatus	7	0.0498631
GO:0004072	molecular_function	aspartate kinase activity	7	0.0498631
GO:0033110	cellular_component	Cvt vesicle membrane	7	0.0498631
