# Supplementary material for: Identification of miRNA–mRNA Regulatory Modules Involved in Lipid Metabolism and Seed Development in a Woody Oil Tree (Camellia oleifera)
Source: Cells. 2021 Dec 27;11(1):71. doi: 10.3390/cells11010071 (PMC8750442; doi:10.3390/cells11010071)
Supplement: Supplementary file 1 [file cells-11-00071-s001.zip › Table S13.xlsx]

## Sheet: KEGG_significant
Table S13. Analysis of the target genes by KEGG significant enrichment
Pathway Id	pathway description	S gene number	Pvalue of Fisher's Exact Test
ko04730	Long-term depression	29	5.3442e-05
ko00620	Pyruvate metabolism	84	9.65891e-05
ko04350	TGF-beta signaling pathway	32	0.000503591
ko04320	Dorso-ventral axis formation	20	0.00217754
ko04270	Vascular smooth muscle contraction	42	0.00218948
ko04622	RIG-I-like receptor signaling pathway	22	0.00257748
ko04664	Fc epsilon RI signaling pathway	24	0.00481862
ko00650	Butanoate metabolism	50	0.00651628
ko04621	NOD-like receptor signaling pathway	20	0.00700834
ko04810	Regulation of actin cytoskeleton	66	0.00784423
ko04620	Toll-like receptor signaling pathway	58	0.00833861
ko02010	ABC transporters	53	0.00999269
ko00061	Fatty acid biosynthesis	34	0.014156
ko04720	Long-term potentiation	48	0.0153896
ko04370	VEGF signaling pathway	29	0.016069
ko04650	Natural killer cell mediated cytotoxicity	27	0.0167673
ko04012	ErbB signaling pathway	26	0.0170869
ko00020	Citrate cycle	48	0.0196012
ko00720	Reductive carboxylate cycle	30	0.0216927
ko00380	Tryptophan metabolism	44	0.0228535
ko00941	Flavonoid biosynthesis	27	0.0235937
ko04910	Insulin signaling pathway	82	0.0238423
ko04510	Focal adhesion	33	0.0264742
ko00010	Glycolysis / Gluconeogenesis	92	0.0301359
ko04660	T cell receptor signaling pathway	26	0.0334369
ko00600	Sphingolipid metabolism	25	0.034493
ko00903	Limonene and pinene degradation	74	0.0384801
ko00860	Porphyrin and chlorophyll metabolism	36	0.0397857
ko00100	Steroid biosynthesis	18	0.0414908
ko00270	Cysteine and methionine metabolism	104	0.0437097
ko04722	Neurotrophin signaling pathway	78	0.0446997
