# Supplementary material for: Identification of miRNA–mRNA Regulatory Modules Involved in Lipid Metabolism and Seed Development in a Woody Oil Tree (Camellia oleifera)
Source: Cells. 2021 Dec 27;11(1):71. doi: 10.3390/cells11010071 (PMC8750442; doi:10.3390/cells11010071)
Supplement: Supplementary file 1 [file cells-11-00071-s001.zip › Table S14.xlsx]

## Sheet: Sheet1
Table S14. KEGG enrichment analysis of diferentially expressed miRNAs and their target genes related to lipid metabolis
KEGG ID	KEGG Name	Gene ID	miRNA	Gene Annoation
ko00061	Fatty acid biosynthesis	comp67446_c0	mdm-MIR391-p5_2ss16CT20GA	sp|B1X935|MNMC_ECODH tRNA 5-methylaminomethyl-2-thiouridine biosynthesis bifunctional protein MnmC OS=Escherichia coli (strain K12 / DH10B) GN=mnmC PE=3 SV=1
ko00061	Fatty acid biosynthesis	comp66889_c0	mdm-MIR391-p5_2ss16CT20GA	sp|B1X935|MNMC_ECODH tRNA 5-methylaminomethyl-2-thiouridine biosynthesis bifunctional protein MnmC OS=Escherichia coli (strain K12 / DH10B) GN=mnmC PE=3 SV=1
ko00061	Fatty acid biosynthesis	comp67554_c0	csi-miR1515_1ss16AG	sp|P21513|RNE_ECOLI Ribonuclease E OS=Escherichia coli (strain K12) GN=rne PE=1 SV=6
ko00061	Fatty acid biosynthesis	comp66257_c0	csi-miR1515_1ss16AG	sp|Q38970|ACC1_ARATH Acetyl-CoA carboxylase 1 OS=Arabidopsis thaliana GN=ACC1 PE=1 SV=1
ko00061	Fatty acid biosynthesis	comp40069_c0	col-miRn-3p-253727_10	sp|P52410|KASC1_ARATH 3-oxoacyl-[acyl-carrier-protein] synthase I, chloroplastic OS=Arabidopsis thaliana GN=KAS1 PE=1 SV=2
ko00061	Fatty acid biosynthesis	comp68523_c0	col-miRn-3p-253727_10	sp|P32152|FRVR_ECOLI Putative frv operon regulatory protein OS=Escherichia coli (strain K12) GN=frvR PE=3 SV=1
ko00061	Fatty acid biosynthesis	comp66293_c0	ath-MIR5645b-p3_2ss18TG20TA	sp|P77334|GMR_ECOLI Cyclic di-GMP phosphodiesterase Gmr OS=Escherichia coli (strain K12) GN=gmr PE=1 SV=1
ko00061	Fatty acid biosynthesis	comp68523_c0	ath-MIR5645b-p3_2ss18TG20TA	sp|P32152|FRVR_ECOLI Putative frv operon regulatory protein OS=Escherichia coli (strain K12) GN=frvR PE=3 SV=1
ko00061	Fatty acid biosynthesis	comp67560_c0	ath-MIR5645b-p3_2ss18TG20TA	sp|P0ACE1|MBHM_ECO57 Hydrogenase-2 large chain OS=Escherichia coli O157:H7 GN=hybC PE=3 SV=2
ko00061	Fatty acid biosynthesis	comp66398_c0	csi-miR162-5p_L-1_1ss5GC	sp|P39342|YJGR_ECOLI Uncharacterized protein YjgR OS=Escherichia coli (strain K12) GN=yjgR PE=4 SV=1
ko00061	Fatty acid biosynthesis	comp67554_c0	csi-miR162-5p_L-1_1ss5GC	sp|P21513|RNE_ECOLI Ribonuclease E OS=Escherichia coli (strain K12) GN=rne PE=1 SV=6
ko00061	Fatty acid biosynthesis	comp66377_c1	csi-miR162-5p_L-1_1ss5GC	sp|P33224|AIDB_ECOLI Putative acyl-CoA dehydrogenase AidB OS=Escherichia coli (strain K12) GN=aidB PE=1 SV=3
ko00061	Fatty acid biosynthesis	comp68409_c0	col-miRn-3p-145806_25	sp|P21513|RNE_ECOLI Ribonuclease E OS=Escherichia coli (strain K12) GN=rne PE=1 SV=6
ko00061	Fatty acid biosynthesis	comp59939_c1	ppe-miR399b_L-2R+2	sp|Q38970|ACC1_ARATH Acetyl-CoA carboxylase 1 OS=Arabidopsis thaliana GN=ACC1 PE=1 SV=1
ko00061	Fatty acid biosynthesis	comp67446_c0	crt-miR168_L-2	sp|B1X935|MNMC_ECODH tRNA 5-methylaminomethyl-2-thiouridine biosynthesis bifunctional protein MnmC OS=Escherichia coli (strain K12 / DH10B) GN=mnmC PE=3 SV=1
ko00061	Fatty acid biosynthesis	comp66889_c0	crt-miR168_L-2	sp|B1X935|MNMC_ECODH tRNA 5-methylaminomethyl-2-thiouridine biosynthesis bifunctional protein MnmC OS=Escherichia coli (strain K12 / DH10B) GN=mnmC PE=3 SV=1
ko00061	Fatty acid biosynthesis	comp66398_c0	crt-miR168_L-2	sp|P39342|YJGR_ECOLI Uncharacterized protein YjgR OS=Escherichia coli (strain K12) GN=yjgR PE=4 SV=1
ko00061	Fatty acid biosynthesis	comp61811_c0	crt-miR168_L-2	sp|P77334|GMR_ECOLI Cyclic di-GMP phosphodiesterase Gmr OS=Escherichia coli (strain K12) GN=gmr PE=1 SV=1
ko00061	Fatty acid biosynthesis	comp66293_c0	crt-miR168_L-2	sp|P77334|GMR_ECOLI Cyclic di-GMP phosphodiesterase Gmr OS=Escherichia coli (strain K12) GN=gmr PE=1 SV=1
ko00061	Fatty acid biosynthesis	comp62043_c0	crt-miR168_L-2	sp|Q42533|BCCP1_ARATH Biotin carboxyl carrier protein of acetyl-CoA carboxylase 1, chloroplastic OS=Arabidopsis thaliana GN=BCCP1 PE=1 SV=2
ko00061	Fatty acid biosynthesis	comp48800_c0	ptc-miR172a	sp|P22337|STAD_RICCO Acyl-[acyl-carrier-protein] desaturase, chloroplastic OS=Ricinus communis PE=1 SV=1
ko00061	Fatty acid biosynthesis	comp66398_c0	ptc-miR172a	sp|P39342|YJGR_ECOLI Uncharacterized protein YjgR OS=Escherichia coli (strain K12) GN=yjgR PE=4 SV=1
ko00061	Fatty acid biosynthesis	comp66377_c1	ptc-miR172a	sp|P33224|AIDB_ECOLI Putative acyl-CoA dehydrogenase AidB OS=Escherichia coli (strain K12) GN=aidB PE=1 SV=3
ko00061	Fatty acid biosynthesis	comp68523_c0	ptc-miR172a	sp|P32152|FRVR_ECOLI Putative frv operon regulatory protein OS=Escherichia coli (strain K12) GN=frvR PE=3 SV=1
ko00061	Fatty acid biosynthesis	comp66054_c0	sly-miR319c-5p_2ss8CT15CT	sp|P05804|BGLR_ECOLI Beta-glucuronidase OS=Escherichia coli (strain K12) GN=uidA PE=1 SV=2
ko00061	Fatty acid biosynthesis	comp67554_c0	mes-miR156a	sp|P21513|RNE_ECOLI Ribonuclease E OS=Escherichia coli (strain K12) GN=rne PE=1 SV=6
ko00061	Fatty acid biosynthesis	comp59939_c1	mes-miR156a	sp|Q38970|ACC1_ARATH Acetyl-CoA carboxylase 1 OS=Arabidopsis thaliana GN=ACC1 PE=1 SV=1
ko00061	Fatty acid biosynthesis	comp67554_c0	hbr-MIR159b-p5_1ss10GT	sp|P21513|RNE_ECOLI Ribonuclease E OS=Escherichia coli (strain K12) GN=rne PE=1 SV=6
ko00061	Fatty acid biosynthesis	comp66257_c0	htu-miR393a_R-1_1ss21CT	sp|Q38970|ACC1_ARATH Acetyl-CoA carboxylase 1 OS=Arabidopsis thaliana GN=ACC1 PE=1 SV=1
ko00061	Fatty acid biosynthesis	comp64234_c0	csi-miR172c_L-1_1ss6TA	sp|Q42533|BCCP1_ARATH Biotin carboxyl carrier protein of acetyl-CoA carboxylase 1, chloroplastic OS=Arabidopsis thaliana GN=BCCP1 PE=1 SV=2
ko00061	Fatty acid biosynthesis	comp66398_c0	csi-miR172c_L-1_1ss6TA	sp|P39342|YJGR_ECOLI Uncharacterized protein YjgR OS=Escherichia coli (strain K12) GN=yjgR PE=4 SV=1
ko00061	Fatty acid biosynthesis	comp67554_c0	han-miR156a_L+1	sp|P21513|RNE_ECOLI Ribonuclease E OS=Escherichia coli (strain K12) GN=rne PE=1 SV=6
ko00061	Fatty acid biosynthesis	comp67446_c0	gma-MIR5368-p3_1ss16CT_1	sp|B1X935|MNMC_ECODH tRNA 5-methylaminomethyl-2-thiouridine biosynthesis bifunctional protein MnmC OS=Escherichia coli (strain K12 / DH10B) GN=mnmC PE=3 SV=1
ko00061	Fatty acid biosynthesis	comp66398_c0	aly-MIR394a-p3_2ss16CA17TG	sp|P39342|YJGR_ECOLI Uncharacterized protein YjgR OS=Escherichia coli (strain K12) GN=yjgR PE=4 SV=1
ko00061	Fatty acid biosynthesis	comp68523_c0	ppe-miR397_1ss10GC	sp|P32152|FRVR_ECOLI Putative frv operon regulatory protein OS=Escherichia coli (strain K12) GN=frvR PE=3 SV=1
ko00061	Fatty acid biosynthesis	comp67554_c0	bcy-miR156_L-1	sp|P21513|RNE_ECOLI Ribonuclease E OS=Escherichia coli (strain K12) GN=rne PE=1 SV=6
ko00061	Fatty acid biosynthesis	comp68409_c0	ssl-miR171b	sp|P21513|RNE_ECOLI Ribonuclease E OS=Escherichia coli (strain K12) GN=rne PE=1 SV=6
ko00061	Fatty acid biosynthesis	comp68523_c0	ssl-miR171b	sp|P32152|FRVR_ECOLI Putative frv operon regulatory protein OS=Escherichia coli (strain K12) GN=frvR PE=3 SV=1
ko00061	Fatty acid biosynthesis	comp66398_c0	ssl-miR171b	sp|P39342|YJGR_ECOLI Uncharacterized protein YjgR OS=Escherichia coli (strain K12) GN=yjgR PE=4 SV=1
ko00061	Fatty acid biosynthesis	comp66377_c1	vvi-miR160c_L+1R-1	sp|P33224|AIDB_ECOLI Putative acyl-CoA dehydrogenase AidB OS=Escherichia coli (strain K12) GN=aidB PE=1 SV=3
ko00061	Fatty acid biosynthesis	comp63911_c0	mtr-miR156h-3p_1ss8AC	sp|Q9Z8P2|FABG_CHLPN 3-oxoacyl-[acyl-carrier-protein] reductase FabG OS=Chlamydia pneumoniae GN=fabG PE=3 SV=1
ko00061	Fatty acid biosynthesis	comp67560_c0	ath-MIR5645e-p5_2ss18TG20TG	sp|P0ACE1|MBHM_ECO57 Hydrogenase-2 large chain OS=Escherichia coli O157:H7 GN=hybC PE=3 SV=2
ko00061	Fatty acid biosynthesis	comp63563_c0	ath-MIR5645e-p5_2ss18TG20TG	sp|P55138|YGCE_ECOLI Uncharacterized sugar kinase YgcE OS=Escherichia coli (strain K12) GN=ygcE PE=3 SV=2
ko00061	Fatty acid biosynthesis	comp44856_c0	col-miRn-5p-2142_1228	sp|Q46829|BGLA_ECOLI 6-phospho-beta-glucosidase BglA OS=Escherichia coli (strain K12) GN=bglA PE=1 SV=2
ko00061	Fatty acid biosynthesis	comp67560_c0	gma-MIR4393b-p3_2ss9AG18AG	sp|P0ACE1|MBHM_ECO57 Hydrogenase-2 large chain OS=Escherichia coli O157:H7 GN=hybC PE=3 SV=2
ko00061	Fatty acid biosynthesis	comp61811_c0	mes-miR530a_R+1_1ss20TG	sp|P77334|GMR_ECOLI Cyclic di-GMP phosphodiesterase Gmr OS=Escherichia coli (strain K12) GN=gmr PE=1 SV=1
ko00061	Fatty acid biosynthesis	comp67554_c0	mdm-miR7122a_2ss4TA21CG	sp|P21513|RNE_ECOLI Ribonuclease E OS=Escherichia coli (strain K12) GN=rne PE=1 SV=6
ko00061	Fatty acid biosynthesis	comp67554_c0	ath-MIR5645b-p3_2ss18TA20TC	sp|P21513|RNE_ECOLI Ribonuclease E OS=Escherichia coli (strain K12) GN=rne PE=1 SV=6
ko00061	Fatty acid biosynthesis	comp66377_c1	gma-miR171m	sp|P33224|AIDB_ECOLI Putative acyl-CoA dehydrogenase AidB OS=Escherichia coli (strain K12) GN=aidB PE=1 SV=3
ko00061	Fatty acid biosynthesis	comp66377_c1	ccl-miR167a	sp|P33224|AIDB_ECOLI Putative acyl-CoA dehydrogenase AidB OS=Escherichia coli (strain K12) GN=aidB PE=1 SV=3
ko00061	Fatty acid biosynthesis	comp67554_c0	tcc-miR162	sp|P21513|RNE_ECOLI Ribonuclease E OS=Escherichia coli (strain K12) GN=rne PE=1 SV=6
ko00061	Fatty acid biosynthesis	comp59939_c1	tcc-miR162	sp|Q38970|ACC1_ARATH Acetyl-CoA carboxylase 1 OS=Arabidopsis thaliana GN=ACC1 PE=1 SV=1
ko00061	Fatty acid biosynthesis	comp63702_c0	tcc-miR162	sp|Q0V7V2|P2C42_ARATH Probable protein phosphatase 2C 42 OS=Arabidopsis thaliana GN=At3g17090 PE=2 SV=1
ko00061	Fatty acid biosynthesis	comp66377_c1	ptc-MIR482d-p3_2ss12AG21CT	sp|P33224|AIDB_ECOLI Putative acyl-CoA dehydrogenase AidB OS=Escherichia coli (strain K12) GN=aidB PE=1 SV=3
ko00061	Fatty acid biosynthesis	comp52199_c0	col-miRn-5p-315953_8	sp|P28645|STAD_SPIOL Acyl-[acyl-carrier-protein] desaturase, chloroplastic OS=Spinacia oleracea PE=2 SV=1
ko00061	Fatty acid biosynthesis	comp66054_c0	ath-miR390a-5p	sp|P05804|BGLR_ECOLI Beta-glucuronidase OS=Escherichia coli (strain K12) GN=uidA PE=1 SV=2
ko00061	Fatty acid biosynthesis	comp61049_c0	ppe-miR1511-3p_L+1R-4	sp|P49245|FABH2_CUPWR 3-oxoacyl-[acyl-carrier-protein] synthase 3 B, chloroplastic OS=Cuphea wrightii GN=KAS3B PE=2 SV=1
ko00061	Fatty acid biosynthesis	comp61049_c0	ppe-miR1511-3p_L+1R-4	sp|P49245|FABH2_CUPWR 3-oxoacyl-[acyl-carrier-protein] synthase 3 B, chloroplastic OS=Cuphea wrightii GN=KAS3B PE=2 SV=1
ko00061	Fatty acid biosynthesis	comp48800_c0	ppe-miR1511-3p_L+1R-4	sp|P22337|STAD_RICCO Acyl-[acyl-carrier-protein] desaturase, chloroplastic OS=Ricinus communis PE=1 SV=1
ko00061	Fatty acid biosynthesis	comp66398_c0	ppe-miR1511-3p_L+1R-4	sp|P39342|YJGR_ECOLI Uncharacterized protein YjgR OS=Escherichia coli (strain K12) GN=yjgR PE=4 SV=1
ko00061	Fatty acid biosynthesis	comp66889_c0	ppe-miR1511-3p_L+1R-4	sp|B1X935|MNMC_ECODH tRNA 5-methylaminomethyl-2-thiouridine biosynthesis bifunctional protein MnmC OS=Escherichia coli (strain K12 / DH10B) GN=mnmC PE=3 SV=1
ko00061	Fatty acid biosynthesis	comp66054_c0	ppe-miR1511-3p_L+1R-4	sp|P05804|BGLR_ECOLI Beta-glucuronidase OS=Escherichia coli (strain K12) GN=uidA PE=1 SV=2
ko00061	Fatty acid biosynthesis	comp68523_c0	mdm-miR408a_L-1R+1	sp|P32152|FRVR_ECOLI Putative frv operon regulatory protein OS=Escherichia coli (strain K12) GN=frvR PE=3 SV=1
ko00061	Fatty acid biosynthesis	comp66398_c0	col-miRn-3p-99527_43	sp|P39342|YJGR_ECOLI Uncharacterized protein YjgR OS=Escherichia coli (strain K12) GN=yjgR PE=4 SV=1
ko00061	Fatty acid biosynthesis	comp66054_c0	tcc-miR390a	sp|P05804|BGLR_ECOLI Beta-glucuronidase OS=Escherichia coli (strain K12) GN=uidA PE=1 SV=2
ko00061	Fatty acid biosynthesis	comp67554_c0	hpe-miR162a_L-2	sp|P21513|RNE_ECOLI Ribonuclease E OS=Escherichia coli (strain K12) GN=rne PE=1 SV=6
ko00061	Fatty acid biosynthesis	comp68523_c0	hpe-miR162a_L-2	sp|P32152|FRVR_ECOLI Putative frv operon regulatory protein OS=Escherichia coli (strain K12) GN=frvR PE=3 SV=1
ko00061	Fatty acid biosynthesis	comp66377_c1	hpe-miR162a_L-2	sp|P33224|AIDB_ECOLI Putative acyl-CoA dehydrogenase AidB OS=Escherichia coli (strain K12) GN=aidB PE=1 SV=3
ko00061	Fatty acid biosynthesis	comp67779_c0	col-miRn-5p-166889_20	sp|P52410|KASC1_ARATH 3-oxoacyl-[acyl-carrier-protein] synthase I, chloroplastic OS=Arabidopsis thaliana GN=KAS1 PE=1 SV=2
ko00061	Fatty acid biosynthesis	comp67560_c0	ath-MIR5645e-p3_1ss18TA	sp|P0ACE1|MBHM_ECO57 Hydrogenase-2 large chain OS=Escherichia coli O157:H7 GN=hybC PE=3 SV=2
ko00061	Fatty acid biosynthesis	comp44856_c0	ath-MIR5645e-p3_1ss18TA	sp|Q46829|BGLA_ECOLI 6-phospho-beta-glucosidase BglA OS=Escherichia coli (strain K12) GN=bglA PE=1 SV=2
ko00061	Fatty acid biosynthesis	comp67554_c0	col-miRn-3p-152189_23	sp|P21513|RNE_ECOLI Ribonuclease E OS=Escherichia coli (strain K12) GN=rne PE=1 SV=6
ko00061	Fatty acid biosynthesis	comp48800_c0	col-miRn-3p-152189_23	sp|P22337|STAD_RICCO Acyl-[acyl-carrier-protein] desaturase, chloroplastic OS=Ricinus communis PE=1 SV=1
ko00061	Fatty acid biosynthesis	comp52017_c0	aly-miR393a-3p_1ss12TC	sp|Q9SLA8|FABI_ARATH Enoyl-[acyl-carrier-protein] reductase [NADH], chloroplastic OS=Arabidopsis thaliana GN=MOD1 PE=1 SV=1
ko00061	Fatty acid biosynthesis	comp68409_c0	sly-miR168b-3p	sp|P21513|RNE_ECOLI Ribonuclease E OS=Escherichia coli (strain K12) GN=rne PE=1 SV=6
ko00061	Fatty acid biosynthesis	comp66377_c1	stu-MIR5303j-p5_2ss10GT17CT	sp|P33224|AIDB_ECOLI Putative acyl-CoA dehydrogenase AidB OS=Escherichia coli (strain K12) GN=aidB PE=1 SV=3
ko00061	Fatty acid biosynthesis	comp67886_c0	stu-MIR5303j-p5_2ss10GT17CT	sp|Q9LD43|ACCA_ARATH Acetyl-coenzyme A carboxylase carboxyl transferase subunit alpha, chloroplastic OS=Arabidopsis thaliana GN=CAC3 PE=1 SV=1
ko00061	Fatty acid biosynthesis	comp67554_c0	stu-MIR5303j-p5_2ss10GT17CT	sp|P21513|RNE_ECOLI Ribonuclease E OS=Escherichia coli (strain K12) GN=rne PE=1 SV=6
ko00061	Fatty acid biosynthesis	comp68523_c0	stu-MIR5303j-p5_2ss10GT17CT	sp|P32152|FRVR_ECOLI Putative frv operon regulatory protein OS=Escherichia coli (strain K12) GN=frvR PE=3 SV=1
ko00061	Fatty acid biosynthesis	comp68409_c0	stu-MIR5303j-p5_2ss10GT17CT	sp|P21513|RNE_ECOLI Ribonuclease E OS=Escherichia coli (strain K12) GN=rne PE=1 SV=6
ko00061	Fatty acid biosynthesis	comp66889_c0	stu-MIR5303j-p5_2ss10GT17CT	sp|B1X935|MNMC_ECODH tRNA 5-methylaminomethyl-2-thiouridine biosynthesis bifunctional protein MnmC OS=Escherichia coli (strain K12 / DH10B) GN=mnmC PE=3 SV=1
ko00061	Fatty acid biosynthesis	comp14178_c0	stu-MIR5303j-p5_2ss10GT17CT	sp|P52410|KASC1_ARATH 3-oxoacyl-[acyl-carrier-protein] synthase I, chloroplastic OS=Arabidopsis thaliana GN=KAS1 PE=1 SV=2
ko00061	Fatty acid biosynthesis	comp67446_c0	ctr-miR164_R-1	sp|B1X935|MNMC_ECODH tRNA 5-methylaminomethyl-2-thiouridine biosynthesis bifunctional protein MnmC OS=Escherichia coli (strain K12 / DH10B) GN=mnmC PE=3 SV=1
ko00061	Fatty acid biosynthesis	comp66054_c0	ctr-miR164_R-1	sp|P05804|BGLR_ECOLI Beta-glucuronidase OS=Escherichia coli (strain K12) GN=uidA PE=1 SV=2
ko00061	Fatty acid biosynthesis	comp66377_c1	csi-miR166e-5p_L-1R+1_1ss21GA	sp|P33224|AIDB_ECOLI Putative acyl-CoA dehydrogenase AidB OS=Escherichia coli (strain K12) GN=aidB PE=1 SV=3
ko00061	Fatty acid biosynthesis	comp67779_c0	csi-miR166e-5p_L-1R+1_1ss21GA	sp|P52410|KASC1_ARATH 3-oxoacyl-[acyl-carrier-protein] synthase I, chloroplastic OS=Arabidopsis thaliana GN=KAS1 PE=1 SV=2
ko00061	Fatty acid biosynthesis	comp44856_c0	csi-miR166e-5p_L-1R+1_1ss21GA	sp|Q46829|BGLA_ECOLI 6-phospho-beta-glucosidase BglA OS=Escherichia coli (strain K12) GN=bglA PE=1 SV=2
ko00061	Fatty acid biosynthesis	comp66398_c0	gma-MIR828a-p3_2ss3AC18CA	sp|P39342|YJGR_ECOLI Uncharacterized protein YjgR OS=Escherichia coli (strain K12) GN=yjgR PE=4 SV=1
ko00061	Fatty acid biosynthesis	comp66398_c0	gma-MIR828a-p3_2ss3AC18CA	sp|P39342|YJGR_ECOLI Uncharacterized protein YjgR OS=Escherichia coli (strain K12) GN=yjgR PE=4 SV=1
ko00061	Fatty acid biosynthesis	comp50840_c0	gma-MIR828a-p3_2ss3AC18CA	sp|Q38970|ACC1_ARATH Acetyl-CoA carboxylase 1 OS=Arabidopsis thaliana GN=ACC1 PE=1 SV=1
ko00061	Fatty acid biosynthesis	comp66054_c0	gma-MIR828a-p3_2ss3AC18CA	sp|P05804|BGLR_ECOLI Beta-glucuronidase OS=Escherichia coli (strain K12) GN=uidA PE=1 SV=2
ko00061	Fatty acid biosynthesis	comp67560_c0	gma-MIR828a-p3_2ss3AC18CA	sp|P0ACE1|MBHM_ECO57 Hydrogenase-2 large chain OS=Escherichia coli O157:H7 GN=hybC PE=3 SV=2
ko00061	Fatty acid biosynthesis	comp68523_c0	gma-MIR828a-p3_2ss3AC18CA	sp|P32152|FRVR_ECOLI Putative frv operon regulatory protein OS=Escherichia coli (strain K12) GN=frvR PE=3 SV=1
ko00061	Fatty acid biosynthesis	comp68523_c0	gma-MIR828a-p3_2ss3AC18CA	sp|P32152|FRVR_ECOLI Putative frv operon regulatory protein OS=Escherichia coli (strain K12) GN=frvR PE=3 SV=1
ko00061	Fatty acid biosynthesis	comp68409_c0	gma-MIR828a-p3_2ss3AC18CA	sp|P21513|RNE_ECOLI Ribonuclease E OS=Escherichia coli (strain K12) GN=rne PE=1 SV=6
ko00061	Fatty acid biosynthesis	comp68409_c0	gma-MIR828a-p3_2ss3AC18CA	sp|P21513|RNE_ECOLI Ribonuclease E OS=Escherichia coli (strain K12) GN=rne PE=1 SV=6
ko00061	Fatty acid biosynthesis	comp63563_c0	gma-MIR828a-p3_2ss3AC18CA	sp|P55138|YGCE_ECOLI Uncharacterized sugar kinase YgcE OS=Escherichia coli (strain K12) GN=ygcE PE=3 SV=2
ko00061	Fatty acid biosynthesis	comp66889_c0	gma-MIR828a-p3_2ss3AC18CA	sp|B1X935|MNMC_ECODH tRNA 5-methylaminomethyl-2-thiouridine biosynthesis bifunctional protein MnmC OS=Escherichia coli (strain K12 / DH10B) GN=mnmC PE=3 SV=1
ko00061	Fatty acid biosynthesis	comp66889_c0	gma-MIR828a-p3_2ss3AC18CA	sp|B1X935|MNMC_ECODH tRNA 5-methylaminomethyl-2-thiouridine biosynthesis bifunctional protein MnmC OS=Escherichia coli (strain K12 / DH10B) GN=mnmC PE=3 SV=1
ko00061	Fatty acid biosynthesis	comp55880_c0	gma-MIR828a-p3_2ss3AC18CA	sp|Q8L3X9|KASM_ARATH 3-oxoacyl-[acyl-carrier-protein] synthase, mitochondrial OS=Arabidopsis thaliana GN=KAS PE=1 SV=1
ko00061	Fatty acid biosynthesis	comp55880_c0	gma-MIR828a-p3_2ss3AC18CA	sp|Q8L3X9|KASM_ARATH 3-oxoacyl-[acyl-carrier-protein] synthase, mitochondrial OS=Arabidopsis thaliana GN=KAS PE=1 SV=1
ko00061	Fatty acid biosynthesis	comp66377_c1	gma-MIR828a-p3_2ss3AC18CA	sp|P33224|AIDB_ECOLI Putative acyl-CoA dehydrogenase AidB OS=Escherichia coli (strain K12) GN=aidB PE=1 SV=3
ko00061	Fatty acid biosynthesis	comp61811_c0	gma-MIR828a-p3_2ss3AC18CA	sp|P77334|GMR_ECOLI Cyclic di-GMP phosphodiesterase Gmr OS=Escherichia coli (strain K12) GN=gmr PE=1 SV=1
ko00061	Fatty acid biosynthesis	comp68409_c0	gma-miR394a-5p_R+1_1ss18TA	sp|P21513|RNE_ECOLI Ribonuclease E OS=Escherichia coli (strain K12) GN=rne PE=1 SV=6
ko00061	Fatty acid biosynthesis	comp67006_c0	mtr-MIR2592bj-p3_2ss12TC19AT_2	sp|Q84VY3|STAD6_ARATH Acyl-[acyl-carrier-protein] desaturase 6, chloroplastic OS=Arabidopsis thaliana GN=S-ACP-DES6 PE=2 SV=2
ko00061	Fatty acid biosynthesis	comp66377_c1	hbr-miR398_2ss9CT21GC	sp|P33224|AIDB_ECOLI Putative acyl-CoA dehydrogenase AidB OS=Escherichia coli (strain K12) GN=aidB PE=1 SV=3
ko00061	Fatty acid biosynthesis	comp66293_c0	ath-MIR5645b-p5_2ss18TG20TA	sp|P77334|GMR_ECOLI Cyclic di-GMP phosphodiesterase Gmr OS=Escherichia coli (strain K12) GN=gmr PE=1 SV=1
ko00061	Fatty acid biosynthesis	comp68523_c0	ath-MIR5645b-p5_2ss18TG20TA	sp|P32152|FRVR_ECOLI Putative frv operon regulatory protein OS=Escherichia coli (strain K12) GN=frvR PE=3 SV=1
ko00061	Fatty acid biosynthesis	comp67560_c0	ath-MIR5645b-p5_2ss18TG20TA	sp|P0ACE1|MBHM_ECO57 Hydrogenase-2 large chain OS=Escherichia coli O157:H7 GN=hybC PE=3 SV=2
ko00061	Fatty acid biosynthesis	comp66398_c0	ath-miR858b	sp|P39342|YJGR_ECOLI Uncharacterized protein YjgR OS=Escherichia coli (strain K12) GN=yjgR PE=4 SV=1
ko00061	Fatty acid biosynthesis	comp61049_c0	rgl-miR5139_L-1	sp|P49245|FABH2_CUPWR 3-oxoacyl-[acyl-carrier-protein] synthase 3 B, chloroplastic OS=Cuphea wrightii GN=KAS3B PE=2 SV=1
ko00061	Fatty acid biosynthesis	comp61049_c0	rgl-miR5139_L-1	sp|P49245|FABH2_CUPWR 3-oxoacyl-[acyl-carrier-protein] synthase 3 B, chloroplastic OS=Cuphea wrightii GN=KAS3B PE=2 SV=1
ko00061	Fatty acid biosynthesis	comp48800_c0	rgl-miR5139_L-1	sp|P22337|STAD_RICCO Acyl-[acyl-carrier-protein] desaturase, chloroplastic OS=Ricinus communis PE=1 SV=1
ko00061	Fatty acid biosynthesis	comp66398_c0	rgl-miR5139_L-1	sp|P39342|YJGR_ECOLI Uncharacterized protein YjgR OS=Escherichia coli (strain K12) GN=yjgR PE=4 SV=1
ko00061	Fatty acid biosynthesis	comp66889_c0	rgl-miR5139_L-1	sp|B1X935|MNMC_ECODH tRNA 5-methylaminomethyl-2-thiouridine biosynthesis bifunctional protein MnmC OS=Escherichia coli (strain K12 / DH10B) GN=mnmC PE=3 SV=1
ko00061	Fatty acid biosynthesis	comp66054_c0	rgl-miR5139_L-1	sp|P05804|BGLR_ECOLI Beta-glucuronidase OS=Escherichia coli (strain K12) GN=uidA PE=1 SV=2
ko00061	Fatty acid biosynthesis	comp67560_c0	ath-MIR5645e-p3_2ss18TG20TG_1	sp|P0ACE1|MBHM_ECO57 Hydrogenase-2 large chain OS=Escherichia coli O157:H7 GN=hybC PE=3 SV=2
ko00061	Fatty acid biosynthesis	comp63563_c0	ath-MIR5645e-p3_2ss18TG20TG_1	sp|P55138|YGCE_ECOLI Uncharacterized sugar kinase YgcE OS=Escherichia coli (strain K12) GN=ygcE PE=3 SV=2
ko00061	Fatty acid biosynthesis	comp68523_c0	gma-miR408a-3p_L-1R+1	sp|P32152|FRVR_ECOLI Putative frv operon regulatory protein OS=Escherichia coli (strain K12) GN=frvR PE=3 SV=1
ko00061	Fatty acid biosynthesis	comp66377_c1	ghr-MIR7499-p3_2ss10GC17CG	sp|P33224|AIDB_ECOLI Putative acyl-CoA dehydrogenase AidB OS=Escherichia coli (strain K12) GN=aidB PE=1 SV=3
ko00061	Fatty acid biosynthesis	comp66377_c1	ghr-MIR7499-p3_2ss10GC17CG	sp|P33224|AIDB_ECOLI Putative acyl-CoA dehydrogenase AidB OS=Escherichia coli (strain K12) GN=aidB PE=1 SV=3
ko00061	Fatty acid biosynthesis	comp68409_c0	ghr-MIR7499-p3_2ss10GC17CG	sp|P21513|RNE_ECOLI Ribonuclease E OS=Escherichia coli (strain K12) GN=rne PE=1 SV=6
ko00061	Fatty acid biosynthesis	comp66054_c0	col-miRn-5p-21064_221	sp|P05804|BGLR_ECOLI Beta-glucuronidase OS=Escherichia coli (strain K12) GN=uidA PE=1 SV=2
ko00061	Fatty acid biosynthesis	comp67050_c0	col-miRn-5p-21064_221	sp|Q9SQI3|FATB_GOSHI Palmitoyl-acyl carrier protein thioesterase, chloroplastic OS=Gossypium hirsutum GN=FATB1 PE=1 SV=1
ko00061	Fatty acid biosynthesis	comp68523_c0	col-miRn-5p-32910_149	sp|P32152|FRVR_ECOLI Putative frv operon regulatory protein OS=Escherichia coli (strain K12) GN=frvR PE=3 SV=1
ko00061	Fatty acid biosynthesis	comp66054_c0	bol-miR398a-3p	sp|P05804|BGLR_ECOLI Beta-glucuronidase OS=Escherichia coli (strain K12) GN=uidA PE=1 SV=2
ko00061	Fatty acid biosynthesis	comp66377_c1	stu-miR482a-5p_2ss3AG12AC	sp|P33224|AIDB_ECOLI Putative acyl-CoA dehydrogenase AidB OS=Escherichia coli (strain K12) GN=aidB PE=1 SV=3
ko00061	Fatty acid biosynthesis	comp68409_c0	stu-miR482a-5p_2ss3AG12AC	sp|P21513|RNE_ECOLI Ribonuclease E OS=Escherichia coli (strain K12) GN=rne PE=1 SV=6
ko00061	Fatty acid biosynthesis	comp66377_c1	csi-miR166e-5p	sp|P33224|AIDB_ECOLI Putative acyl-CoA dehydrogenase AidB OS=Escherichia coli (strain K12) GN=aidB PE=1 SV=3
ko00061	Fatty acid biosynthesis	comp44856_c0	csi-miR166e-5p	sp|Q46829|BGLA_ECOLI 6-phospho-beta-glucosidase BglA OS=Escherichia coli (strain K12) GN=bglA PE=1 SV=2
ko00061	Fatty acid biosynthesis	comp67779_c0	csi-miR166e-5p	sp|P52410|KASC1_ARATH 3-oxoacyl-[acyl-carrier-protein] synthase I, chloroplastic OS=Arabidopsis thaliana GN=KAS1 PE=1 SV=2
ko00061	Fatty acid biosynthesis	comp67006_c0	csi-miR166e-5p	sp|Q84VY3|STAD6_ARATH Acyl-[acyl-carrier-protein] desaturase 6, chloroplastic OS=Arabidopsis thaliana GN=S-ACP-DES6 PE=2 SV=2
ko00061	Fatty acid biosynthesis	comp68523_c0	csi-miR166e-5p	sp|P32152|FRVR_ECOLI Putative frv operon regulatory protein OS=Escherichia coli (strain K12) GN=frvR PE=3 SV=1
ko00061	Fatty acid biosynthesis	comp44856_c0	aly-miR166g-5p_2ss10TG20GT	sp|Q46829|BGLA_ECOLI 6-phospho-beta-glucosidase BglA OS=Escherichia coli (strain K12) GN=bglA PE=1 SV=2
ko00061	Fatty acid biosynthesis	comp68409_c0	tcc-miR403a	sp|P21513|RNE_ECOLI Ribonuclease E OS=Escherichia coli (strain K12) GN=rne PE=1 SV=6
ko00061	Fatty acid biosynthesis	comp68409_c0	dpr-miR408_L-1	sp|P21513|RNE_ECOLI Ribonuclease E OS=Escherichia coli (strain K12) GN=rne PE=1 SV=6
ko00061	Fatty acid biosynthesis	comp68409_c0	dpr-miR408_L-1	sp|P21513|RNE_ECOLI Ribonuclease E OS=Escherichia coli (strain K12) GN=rne PE=1 SV=6
ko00061	Fatty acid biosynthesis	comp63563_c0	dpr-miR408_L-1	sp|P55138|YGCE_ECOLI Uncharacterized sugar kinase YgcE OS=Escherichia coli (strain K12) GN=ygcE PE=3 SV=2
ko00061	Fatty acid biosynthesis	comp68523_c0	dpr-miR408_L-1	sp|P32152|FRVR_ECOLI Putative frv operon regulatory protein OS=Escherichia coli (strain K12) GN=frvR PE=3 SV=1
ko00061	Fatty acid biosynthesis	comp67554_c0	dpr-miR408_L-1	sp|P21513|RNE_ECOLI Ribonuclease E OS=Escherichia coli (strain K12) GN=rne PE=1 SV=6
ko00061	Fatty acid biosynthesis	comp66377_c1	ptc-miR172b-5p	sp|P33224|AIDB_ECOLI Putative acyl-CoA dehydrogenase AidB OS=Escherichia coli (strain K12) GN=aidB PE=1 SV=3
ko00061	Fatty acid biosynthesis	comp66398_c0	aqc-miR172b_1ss21TG	sp|P39342|YJGR_ECOLI Uncharacterized protein YjgR OS=Escherichia coli (strain K12) GN=yjgR PE=4 SV=1
ko00061	Fatty acid biosynthesis	comp66377_c1	aqc-miR172b_1ss21TG	sp|P33224|AIDB_ECOLI Putative acyl-CoA dehydrogenase AidB OS=Escherichia coli (strain K12) GN=aidB PE=1 SV=3
ko00061	Fatty acid biosynthesis	comp45124_c0	aqc-miR172b_1ss21TG	sp|Q83KF5|MDTQ_SHIFL Putative multidrug resistance outer membrane protein MdtQ OS=Shigella flexneri GN=mdtQ PE=5 SV=3
ko00061	Fatty acid biosynthesis	comp67560_c0	aqc-miR172b_1ss21TG	sp|P0ACE1|MBHM_ECO57 Hydrogenase-2 large chain OS=Escherichia coli O157:H7 GN=hybC PE=3 SV=2
ko00061	Fatty acid biosynthesis	comp66054_c0	ama-miR396-5p_1ss21TG	sp|P05804|BGLR_ECOLI Beta-glucuronidase OS=Escherichia coli (strain K12) GN=uidA PE=1 SV=2
ko00061	Fatty acid biosynthesis	comp66054_c0	ama-miR396-5p_1ss21TG	sp|P05804|BGLR_ECOLI Beta-glucuronidase OS=Escherichia coli (strain K12) GN=uidA PE=1 SV=2
ko00061	Fatty acid biosynthesis	comp68409_c0	lja-miR390a-3p_1ss8CT	sp|P21513|RNE_ECOLI Ribonuclease E OS=Escherichia coli (strain K12) GN=rne PE=1 SV=6
ko00061	Fatty acid biosynthesis	comp67554_c0	mdm-MIR167c-p3_1ss6AG	sp|P21513|RNE_ECOLI Ribonuclease E OS=Escherichia coli (strain K12) GN=rne PE=1 SV=6
ko00061	Fatty acid biosynthesis	comp66054_c0	gra-miR167a_L-2R+2	sp|P05804|BGLR_ECOLI Beta-glucuronidase OS=Escherichia coli (strain K12) GN=uidA PE=1 SV=2
ko00061	Fatty acid biosynthesis	comp61811_c0	gra-miR167a_L-2R+2	sp|P77334|GMR_ECOLI Cyclic di-GMP phosphodiesterase Gmr OS=Escherichia coli (strain K12) GN=gmr PE=1 SV=1
ko00061	Fatty acid biosynthesis	comp68523_c0	nta-MIR6149a-p5_2ss18CT21TA	sp|P32152|FRVR_ECOLI Putative frv operon regulatory protein OS=Escherichia coli (strain K12) GN=frvR PE=3 SV=1
ko00061	Fatty acid biosynthesis	comp66054_c0	amg-miR396	sp|P05804|BGLR_ECOLI Beta-glucuronidase OS=Escherichia coli (strain K12) GN=uidA PE=1 SV=2
ko00061	Fatty acid biosynthesis	comp66054_c0	amg-miR396	sp|P05804|BGLR_ECOLI Beta-glucuronidase OS=Escherichia coli (strain K12) GN=uidA PE=1 SV=2
ko00061	Fatty acid biosynthesis	comp66377_c1	aly-miR171c-5p_1ss5AG	sp|P33224|AIDB_ECOLI Putative acyl-CoA dehydrogenase AidB OS=Escherichia coli (strain K12) GN=aidB PE=1 SV=3
ko00061	Fatty acid biosynthesis	comp68523_c0	aly-miR171c-5p_1ss5AG	sp|P32152|FRVR_ECOLI Putative frv operon regulatory protein OS=Escherichia coli (strain K12) GN=frvR PE=3 SV=1
ko00061	Fatty acid biosynthesis	comp68523_c0	aly-miR171c-5p_1ss5AG	sp|P32152|FRVR_ECOLI Putative frv operon regulatory protein OS=Escherichia coli (strain K12) GN=frvR PE=3 SV=1
ko00061	Fatty acid biosynthesis	comp63026_c1	cpa-miR164d	sp|Q8R3F5|FABD_MOUSE Malonyl-CoA-acyl carrier protein transacylase, mitochondrial OS=Mus musculus GN=Mcat PE=2 SV=3
ko00061	Fatty acid biosynthesis	comp66293_c0	dpr-miR167a_L-2R+3	sp|P77334|GMR_ECOLI Cyclic di-GMP phosphodiesterase Gmr OS=Escherichia coli (strain K12) GN=gmr PE=1 SV=1
ko00061	Fatty acid biosynthesis	comp66054_c0	lja-miR171c	sp|P05804|BGLR_ECOLI Beta-glucuronidase OS=Escherichia coli (strain K12) GN=uidA PE=1 SV=2
ko00061	Fatty acid biosynthesis	comp66293_c0	gma-miR319a	sp|P77334|GMR_ECOLI Cyclic di-GMP phosphodiesterase Gmr OS=Escherichia coli (strain K12) GN=gmr PE=1 SV=1
ko00061	Fatty acid biosynthesis	comp61811_c0	col-miRn-5p-46619_106	sp|P77334|GMR_ECOLI Cyclic di-GMP phosphodiesterase Gmr OS=Escherichia coli (strain K12) GN=gmr PE=1 SV=1
ko00061	Fatty acid biosynthesis	comp68201_c1	mes-MIR477g-p5_1ss1CT	sp|Q9SLA8|FABI_ARATH Enoyl-[acyl-carrier-protein] reductase [NADH], chloroplastic OS=Arabidopsis thaliana GN=MOD1 PE=1 SV=1
ko00061	Fatty acid biosynthesis	comp68409_c0	ama-miR396-3p_L-2R+2	sp|P21513|RNE_ECOLI Ribonuclease E OS=Escherichia coli (strain K12) GN=rne PE=1 SV=6
ko00061	Fatty acid biosynthesis	comp68409_c0	ahy-miR167-3p_2ss8GA15TC	sp|P21513|RNE_ECOLI Ribonuclease E OS=Escherichia coli (strain K12) GN=rne PE=1 SV=6
ko00061	Fatty acid biosynthesis	comp68409_c0	ahy-miR167-3p_2ss8GA15TC	sp|P21513|RNE_ECOLI Ribonuclease E OS=Escherichia coli (strain K12) GN=rne PE=1 SV=6
ko00061	Fatty acid biosynthesis	comp48800_c0	nta-miR172d	sp|P22337|STAD_RICCO Acyl-[acyl-carrier-protein] desaturase, chloroplastic OS=Ricinus communis PE=1 SV=1
ko00061	Fatty acid biosynthesis	comp66398_c0	nta-miR172d	sp|P39342|YJGR_ECOLI Uncharacterized protein YjgR OS=Escherichia coli (strain K12) GN=yjgR PE=4 SV=1
ko00061	Fatty acid biosynthesis	comp66377_c1	nta-miR172d	sp|P33224|AIDB_ECOLI Putative acyl-CoA dehydrogenase AidB OS=Escherichia coli (strain K12) GN=aidB PE=1 SV=3
ko00061	Fatty acid biosynthesis	comp68523_c0	nta-miR172d	sp|P32152|FRVR_ECOLI Putative frv operon regulatory protein OS=Escherichia coli (strain K12) GN=frvR PE=3 SV=1
ko00061	Fatty acid biosynthesis	comp66054_c0	ppe-miR172a-5p_1ss21GA	sp|P05804|BGLR_ECOLI Beta-glucuronidase OS=Escherichia coli (strain K12) GN=uidA PE=1 SV=2
ko00061	Fatty acid biosynthesis	comp67886_c0	ama-miR396-5p	sp|Q9LD43|ACCA_ARATH Acetyl-coenzyme A carboxylase carboxyl transferase subunit alpha, chloroplastic OS=Arabidopsis thaliana GN=CAC3 PE=1 SV=1
ko00061	Fatty acid biosynthesis	comp67886_c0	ama-miR396-5p	sp|Q9LD43|ACCA_ARATH Acetyl-coenzyme A carboxylase carboxyl transferase subunit alpha, chloroplastic OS=Arabidopsis thaliana GN=CAC3 PE=1 SV=1
ko00061	Fatty acid biosynthesis	comp67446_c0	cpa-miR164a	sp|B1X935|MNMC_ECODH tRNA 5-methylaminomethyl-2-thiouridine biosynthesis bifunctional protein MnmC OS=Escherichia coli (strain K12 / DH10B) GN=mnmC PE=3 SV=1
ko00061	Fatty acid biosynthesis	comp66398_c0	aqc-MIR172b-p3_1ss9TC	sp|P39342|YJGR_ECOLI Uncharacterized protein YjgR OS=Escherichia coli (strain K12) GN=yjgR PE=4 SV=1
ko00061	Fatty acid biosynthesis	comp67560_c0	aqc-MIR172b-p3_1ss9TC	sp|P0ACE1|MBHM_ECO57 Hydrogenase-2 large chain OS=Escherichia coli O157:H7 GN=hybC PE=3 SV=2
ko00061	Fatty acid biosynthesis	comp68523_c0	hbr-MIR159b-p3_1ss20GA	sp|P32152|FRVR_ECOLI Putative frv operon regulatory protein OS=Escherichia coli (strain K12) GN=frvR PE=3 SV=1
ko00061	Fatty acid biosynthesis	comp66054_c0	mtr-MIR2592bj-p3_2ss12TC19AT_1	sp|P05804|BGLR_ECOLI Beta-glucuronidase OS=Escherichia coli (strain K12) GN=uidA PE=1 SV=2
ko00061	Fatty acid biosynthesis	comp66054_c0	mtr-MIR2592bj-p3_2ss12TC19AT_1	sp|P05804|BGLR_ECOLI Beta-glucuronidase OS=Escherichia coli (strain K12) GN=uidA PE=1 SV=2
ko00061	Fatty acid biosynthesis	comp48800_c0	ath-miR172a	sp|P22337|STAD_RICCO Acyl-[acyl-carrier-protein] desaturase, chloroplastic OS=Ricinus communis PE=1 SV=1
ko00061	Fatty acid biosynthesis	comp66398_c0	ath-miR172a	sp|P39342|YJGR_ECOLI Uncharacterized protein YjgR OS=Escherichia coli (strain K12) GN=yjgR PE=4 SV=1
ko00061	Fatty acid biosynthesis	comp66377_c1	ath-miR172a	sp|P33224|AIDB_ECOLI Putative acyl-CoA dehydrogenase AidB OS=Escherichia coli (strain K12) GN=aidB PE=1 SV=3
ko00061	Fatty acid biosynthesis	comp68523_c0	ath-miR172a	sp|P32152|FRVR_ECOLI Putative frv operon regulatory protein OS=Escherichia coli (strain K12) GN=frvR PE=3 SV=1
ko00061	Fatty acid biosynthesis	comp66889_c0	ppe-miR535b	sp|B1X935|MNMC_ECODH tRNA 5-methylaminomethyl-2-thiouridine biosynthesis bifunctional protein MnmC OS=Escherichia coli (strain K12 / DH10B) GN=mnmC PE=3 SV=1
ko00061	Fatty acid biosynthesis	comp67560_c0	ath-MIR5645e-p3_2ss18TG20TG_2	sp|P0ACE1|MBHM_ECO57 Hydrogenase-2 large chain OS=Escherichia coli O157:H7 GN=hybC PE=3 SV=2
ko00061	Fatty acid biosynthesis	comp63563_c0	ath-MIR5645e-p3_2ss18TG20TG_2	sp|P55138|YGCE_ECOLI Uncharacterized sugar kinase YgcE OS=Escherichia coli (strain K12) GN=ygcE PE=3 SV=2
ko00061	Fatty acid biosynthesis	comp66377_c1	ccl-miR171	sp|P33224|AIDB_ECOLI Putative acyl-CoA dehydrogenase AidB OS=Escherichia coli (strain K12) GN=aidB PE=1 SV=3
ko00061	Fatty acid biosynthesis	comp68523_c0	ccl-miR171	sp|P32152|FRVR_ECOLI Putative frv operon regulatory protein OS=Escherichia coli (strain K12) GN=frvR PE=3 SV=1
ko00071	Fatty acid metabolism	comp64577_c0	mdm-MIR391-p5_2ss16CT20GA	sp|P0ABD0|BETT_ECO57 High-affinity choline transport protein OS=Escherichia coli O157:H7 GN=betT PE=3 SV=1
ko00071	Fatty acid metabolism	comp68457_c0	bol-miR171a_1ss19AG	sp|P77802|YAGX_ECOLI Uncharacterized protein YagX OS=Escherichia coli (strain K12) GN=yagX PE=4 SV=1
ko00071	Fatty acid metabolism	comp68419_c0	bol-miR171a_1ss19AG	sp|P52647|NIFJ_ECOLI Probable pyruvate-flavodoxin oxidoreductase OS=Escherichia coli (strain K12) GN=ydbK PE=3 SV=2
ko00071	Fatty acid metabolism	comp68319_c0	col-miRn-3p-16403_272	sp|P77802|YAGX_ECOLI Uncharacterized protein YagX OS=Escherichia coli (strain K12) GN=yagX PE=4 SV=1
ko00071	Fatty acid metabolism	comp68319_c0	col-miRn-3p-16403_272	sp|P77802|YAGX_ECOLI Uncharacterized protein YagX OS=Escherichia coli (strain K12) GN=yagX PE=4 SV=1
ko00071	Fatty acid metabolism	comp62562_c0	col-miRn-3p-253727_10	sp|B7MNB1|OPGB_ECO45 Phosphoglycerol transferase I OS=Escherichia coli O45:K1 (strain S88 / ExPEC) GN=mdoB PE=3 SV=1
ko00071	Fatty acid metabolism	comp61400_c0	ath-MIR5645b-p3_2ss18TG20TA	sp|F4HUK6|AAE1_ARATH Probable acyl-activating enzyme 1, peroxisomal OS=Arabidopsis thaliana GN=AAE1 PE=2 SV=1
ko00071	Fatty acid metabolism	comp64577_c0	col-miRn-3p-145806_25	sp|P0ABD0|BETT_ECO57 High-affinity choline transport protein OS=Escherichia coli O157:H7 GN=betT PE=3 SV=1
ko00071	Fatty acid metabolism	comp31487_c0	col-miRn-3p-145806_25	sp|Q9FIK7|THIC2_ARATH Probable acetyl-CoA acetyltransferase, cytosolic 2 OS=Arabidopsis thaliana GN=At5g47720 PE=2 SV=1
ko00071	Fatty acid metabolism	comp31487_c0	col-miRn-3p-145806_25	sp|Q9FIK7|THIC2_ARATH Probable acetyl-CoA acetyltransferase, cytosolic 2 OS=Arabidopsis thaliana GN=At5g47720 PE=2 SV=1
ko00071	Fatty acid metabolism	comp68304_c0	ppe-miR399b_L-2R+2	sp|Q96329|ACOX4_ARATH Acyl-coenzyme A oxidase 4, peroxisomal OS=Arabidopsis thaliana GN=ACX4 PE=1 SV=1
ko00071	Fatty acid metabolism	comp68457_c0	ppe-miR399b_L-2R+2	sp|P77802|YAGX_ECOLI Uncharacterized protein YagX OS=Escherichia coli (strain K12) GN=yagX PE=4 SV=1
ko00071	Fatty acid metabolism	comp55426_c0	ppe-miR399b_L-2R+2	sp|Q8W033|AL3I1_ARATH Aldehyde dehydrogenase family 3 member I1, chloroplastic OS=Arabidopsis thaliana GN=ALDH3I1 PE=2 SV=2
ko00071	Fatty acid metabolism	comp62562_c0	crt-miR168_L-2	sp|B7MNB1|OPGB_ECO45 Phosphoglycerol transferase I OS=Escherichia coli O45:K1 (strain S88 / ExPEC) GN=mdoB PE=3 SV=1
ko00071	Fatty acid metabolism	comp62562_c0	crt-miR168_L-2	sp|B7MNB1|OPGB_ECO45 Phosphoglycerol transferase I OS=Escherichia coli O45:K1 (strain S88 / ExPEC) GN=mdoB PE=3 SV=1
ko00071	Fatty acid metabolism	comp68319_c0	crt-miR168_L-2	sp|P77802|YAGX_ECOLI Uncharacterized protein YagX OS=Escherichia coli (strain K12) GN=yagX PE=4 SV=1
ko00071	Fatty acid metabolism	comp68457_c0	crt-miR168_L-2	sp|P77802|YAGX_ECOLI Uncharacterized protein YagX OS=Escherichia coli (strain K12) GN=yagX PE=4 SV=1
ko00071	Fatty acid metabolism	comp45583_c0	crt-miR168_L-2	sp|A7ZIA4|FRMA_ECO24 S-(hydroxymethyl)glutathione dehydrogenase OS=Escherichia coli O139:H28 (strain E24377A / ETEC) GN=frmA PE=3 SV=1
ko00071	Fatty acid metabolism	comp64818_c0	crt-miR168_L-2	sp|P0CZ23|ACOX3_ARATH Acyl-coenzyme A oxidase 3, peroxisomal OS=Arabidopsis thaliana GN=ACX3 PE=1 SV=1
ko00071	Fatty acid metabolism	comp68319_c0	ptc-miR172a	sp|P77802|YAGX_ECOLI Uncharacterized protein YagX OS=Escherichia coli (strain K12) GN=yagX PE=4 SV=1
ko00071	Fatty acid metabolism	comp67128_c0	aly-miR169b-3p_2ss12C-15CT	sp|Q9SU63|AL2B4_ARATH Aldehyde dehydrogenase family 2 member B4, mitochondrial OS=Arabidopsis thaliana GN=ALDH2B4 PE=2 SV=1
ko00071	Fatty acid metabolism	comp33517_c0	sly-miR319c-5p_2ss8CT15CT	sp|Q9T009|LACS5_ARATH Long chain acyl-CoA synthetase 5 OS=Arabidopsis thaliana GN=LACS5 PE=2 SV=1
ko00071	Fatty acid metabolism	comp68457_c0	sly-miR319c-5p_2ss8CT15CT	sp|P77802|YAGX_ECOLI Uncharacterized protein YagX OS=Escherichia coli (strain K12) GN=yagX PE=4 SV=1
ko00071	Fatty acid metabolism	comp49262_c0	hbr-MIR159b-p5_1ss10GT	sp|Q8LPS1|LACS6_ARATH Long chain acyl-CoA synthetase 6, peroxisomal OS=Arabidopsis thaliana GN=LACS6 PE=1 SV=1
ko00071	Fatty acid metabolism	comp68319_c0	csi-miR172c_L-1_1ss6TA	sp|P77802|YAGX_ECOLI Uncharacterized protein YagX OS=Escherichia coli (strain K12) GN=yagX PE=4 SV=1
ko00071	Fatty acid metabolism	comp68457_c0	aly-MIR394a-p3_2ss16CA17TG	sp|P77802|YAGX_ECOLI Uncharacterized protein YagX OS=Escherichia coli (strain K12) GN=yagX PE=4 SV=1
ko00071	Fatty acid metabolism	comp68319_c0	aly-MIR394a-p3_2ss16CA17TG	sp|P77802|YAGX_ECOLI Uncharacterized protein YagX OS=Escherichia coli (strain K12) GN=yagX PE=4 SV=1
ko00071	Fatty acid metabolism	comp68319_c0	aly-MIR394a-p3_2ss16CA17TG	sp|P77802|YAGX_ECOLI Uncharacterized protein YagX OS=Escherichia coli (strain K12) GN=yagX PE=4 SV=1
ko00071	Fatty acid metabolism	comp68069_c0	ppe-miR397_1ss10GC	sp|Q56WD9|THIK2_ARATH 3-ketoacyl-CoA thiolase 2, peroxisomal OS=Arabidopsis thaliana GN=PED1 PE=1 SV=2
ko00071	Fatty acid metabolism	comp45583_c0	ssl-miR171b	sp|A7ZIA4|FRMA_ECO24 S-(hydroxymethyl)glutathione dehydrogenase OS=Escherichia coli O139:H28 (strain E24377A / ETEC) GN=frmA PE=3 SV=1
ko00071	Fatty acid metabolism	comp68419_c0	ssl-miR171b	sp|P52647|NIFJ_ECOLI Probable pyruvate-flavodoxin oxidoreductase OS=Escherichia coli (strain K12) GN=ydbK PE=3 SV=2
ko00071	Fatty acid metabolism	comp64577_c0	ssl-miR171b	sp|P0ABD0|BETT_ECO57 High-affinity choline transport protein OS=Escherichia coli O157:H7 GN=betT PE=3 SV=1
ko00071	Fatty acid metabolism	comp68419_c0	mtr-miR156h-3p_1ss8AC	sp|P52647|NIFJ_ECOLI Probable pyruvate-flavodoxin oxidoreductase OS=Escherichia coli (strain K12) GN=ydbK PE=3 SV=2
ko00071	Fatty acid metabolism	comp68419_c0	mes-miR530a_R+1_1ss20TG	sp|P52647|NIFJ_ECOLI Probable pyruvate-flavodoxin oxidoreductase OS=Escherichia coli (strain K12) GN=ydbK PE=3 SV=2
ko00071	Fatty acid metabolism	comp68319_c0	aqc-miR169c_R+1_1ss20GA	sp|P77802|YAGX_ECOLI Uncharacterized protein YagX OS=Escherichia coli (strain K12) GN=yagX PE=4 SV=1
ko00071	Fatty acid metabolism	comp64597_c0	gra-MIR482d-p3_2ss13CT17CT	sp|O65202|ACOX1_ARATH Peroxisomal acyl-coenzyme A oxidase 1 OS=Arabidopsis thaliana GN=ACX1 PE=1 SV=1
ko00071	Fatty acid metabolism	comp64825_c0	gra-MIR482d-p3_2ss13CT17CT	sp|P14673|ADH1_SOLTU Alcohol dehydrogenase 1 OS=Solanum tuberosum GN=ADH1 PE=2 SV=1
ko00071	Fatty acid metabolism	comp68457_c0	rco-miR171c	sp|P77802|YAGX_ECOLI Uncharacterized protein YagX OS=Escherichia coli (strain K12) GN=yagX PE=4 SV=1
ko00071	Fatty acid metabolism	comp55426_c0	mdm-miR7122a_2ss4TA21CG	sp|Q8W033|AL3I1_ARATH Aldehyde dehydrogenase family 3 member I1, chloroplastic OS=Arabidopsis thaliana GN=ALDH3I1 PE=2 SV=2
ko00071	Fatty acid metabolism	comp68319_c0	ccl-miR167a	sp|P77802|YAGX_ECOLI Uncharacterized protein YagX OS=Escherichia coli (strain K12) GN=yagX PE=4 SV=1
ko00071	Fatty acid metabolism	comp68319_c0	ath-miR390a-5p	sp|P77802|YAGX_ECOLI Uncharacterized protein YagX OS=Escherichia coli (strain K12) GN=yagX PE=4 SV=1
ko00071	Fatty acid metabolism	comp43617_c0	ppe-miR1511-3p_L+1R-4	sp|A7ZIA4|FRMA_ECO24 S-(hydroxymethyl)glutathione dehydrogenase OS=Escherichia coli O139:H28 (strain E24377A / ETEC) GN=frmA PE=3 SV=1
ko00071	Fatty acid metabolism	comp62308_c0	ppe-miR1511-3p_L+1R-4	-
ko00071	Fatty acid metabolism	comp62562_c0	ppe-miR1511-3p_L+1R-4	sp|B7MNB1|OPGB_ECO45 Phosphoglycerol transferase I OS=Escherichia coli O45:K1 (strain S88 / ExPEC) GN=mdoB PE=3 SV=1
ko00071	Fatty acid metabolism	comp68457_c0	mdm-miR408a_L-1R+1	sp|P77802|YAGX_ECOLI Uncharacterized protein YagX OS=Escherichia coli (strain K12) GN=yagX PE=4 SV=1
ko00071	Fatty acid metabolism	comp66752_c0	mdm-miR408a_L-1R+1	sp|Q8S4Y1|THIC1_ARATH Acetyl-CoA acetyltransferase, cytosolic 1 OS=Arabidopsis thaliana GN=AAT1 PE=2 SV=1
ko00071	Fatty acid metabolism	comp68319_c0	tcc-miR390a	sp|P77802|YAGX_ECOLI Uncharacterized protein YagX OS=Escherichia coli (strain K12) GN=yagX PE=4 SV=1
ko00071	Fatty acid metabolism	comp68058_c0	aly-miR399f-3p	sp|Q9SJD4|LACS8_ARATH Long chain acyl-CoA synthetase 8 OS=Arabidopsis thaliana GN=LACS8 PE=2 SV=1
ko00071	Fatty acid metabolism	comp68457_c0	aly-miR399f-3p	sp|P77802|YAGX_ECOLI Uncharacterized protein YagX OS=Escherichia coli (strain K12) GN=yagX PE=4 SV=1
ko00071	Fatty acid metabolism	comp62562_c0	aly-miR399f-3p	sp|B7MNB1|OPGB_ECO45 Phosphoglycerol transferase I OS=Escherichia coli O45:K1 (strain S88 / ExPEC) GN=mdoB PE=3 SV=1
ko00071	Fatty acid metabolism	comp68319_c0	aly-miR399f-3p	sp|P77802|YAGX_ECOLI Uncharacterized protein YagX OS=Escherichia coli (strain K12) GN=yagX PE=4 SV=1
ko00071	Fatty acid metabolism	comp68319_c0	hpe-miR162a_L-2	sp|P77802|YAGX_ECOLI Uncharacterized protein YagX OS=Escherichia coli (strain K12) GN=yagX PE=4 SV=1
ko00071	Fatty acid metabolism	comp68319_c0	hpe-miR162a_L-2	sp|P77802|YAGX_ECOLI Uncharacterized protein YagX OS=Escherichia coli (strain K12) GN=yagX PE=4 SV=1
ko00071	Fatty acid metabolism	comp55523_c0	hpe-miR162a_L-2	sp|Q8XA34|CAIC_ECO57 Probable crotonobetaine/carnitine-CoA ligase OS=Escherichia coli O157:H7 GN=caiC PE=3 SV=2
ko00071	Fatty acid metabolism	comp55523_c0	hpe-miR162a_L-2	sp|Q8XA34|CAIC_ECO57 Probable crotonobetaine/carnitine-CoA ligase OS=Escherichia coli O157:H7 GN=caiC PE=3 SV=2
ko00071	Fatty acid metabolism	comp46671_c0	col-miRn-5p-166889_20	sp|Q62651|ECH1_RAT Delta(3,5)-Delta(2,4)-dienoyl-CoA isomerase, mitochondrial OS=Rattus norvegicus GN=Ech1 PE=1 SV=2
ko00071	Fatty acid metabolism	comp64577_c0	ath-MIR5645e-p3_1ss18TA	sp|P0ABD0|BETT_ECO57 High-affinity choline transport protein OS=Escherichia coli O157:H7 GN=betT PE=3 SV=1
ko00071	Fatty acid metabolism	comp64577_c0	dpr-miR167a_R+1	sp|P0ABD0|BETT_ECO57 High-affinity choline transport protein OS=Escherichia coli O157:H7 GN=betT PE=3 SV=1
ko00071	Fatty acid metabolism	comp66823_c0	dpr-miR167a_R+1	sp|Q9FJD0|VP26A_ARATH Vacuolar protein sorting-associated protein 26A OS=Arabidopsis thaliana GN=VPS26A PE=2 SV=1
ko00071	Fatty acid metabolism	comp68319_c0	dpr-miR167a_R+1	sp|P77802|YAGX_ECOLI Uncharacterized protein YagX OS=Escherichia coli (strain K12) GN=yagX PE=4 SV=1
ko00071	Fatty acid metabolism	comp67112_c0	stu-MIR5303j-p5_2ss10GT17CT	sp|Q9SHJ8|HIBC8_ARATH 3-hydroxyisobutyryl-CoA hydrolase-like protein 5 OS=Arabidopsis thaliana GN=At1g06550 PE=2 SV=2
ko00071	Fatty acid metabolism	comp62231_c0	stu-MIR5303j-p5_2ss10GT17CT	sp|Q9SYG7|AL7B4_ARATH Aldehyde dehydrogenase family 7 member B4 OS=Arabidopsis thaliana GN=ALDH7B4 PE=2 SV=3
ko00071	Fatty acid metabolism	comp26573_c0	stu-MIR5303j-p5_2ss10GT17CT	sp|Q9SK86|ADHL1_ARATH Alcohol dehydrogenase-like 1 OS=Arabidopsis thaliana GN=At1g22430 PE=2 SV=1
ko00071	Fatty acid metabolism	comp66823_c0	stu-MIR5303j-p5_2ss10GT17CT	sp|Q9FJD0|VP26A_ARATH Vacuolar protein sorting-associated protein 26A OS=Arabidopsis thaliana GN=VPS26A PE=2 SV=1
ko00071	Fatty acid metabolism	comp66823_c0	stu-MIR5303j-p5_2ss10GT17CT	sp|Q9FJD0|VP26A_ARATH Vacuolar protein sorting-associated protein 26A OS=Arabidopsis thaliana GN=VPS26A PE=2 SV=1
ko00071	Fatty acid metabolism	comp68419_c0	ctr-miR164_R-1	sp|P52647|NIFJ_ECOLI Probable pyruvate-flavodoxin oxidoreductase OS=Escherichia coli (strain K12) GN=ydbK PE=3 SV=2
ko00071	Fatty acid metabolism	comp68319_c0	ctr-miR164_R-1	sp|P77802|YAGX_ECOLI Uncharacterized protein YagX OS=Escherichia coli (strain K12) GN=yagX PE=4 SV=1
ko00071	Fatty acid metabolism	comp68457_c0	ctr-miR164_R-1	sp|P77802|YAGX_ECOLI Uncharacterized protein YagX OS=Escherichia coli (strain K12) GN=yagX PE=4 SV=1
ko00071	Fatty acid metabolism	comp62562_c0	ctr-miR164_R-1	sp|B7MNB1|OPGB_ECO45 Phosphoglycerol transferase I OS=Escherichia coli O45:K1 (strain S88 / ExPEC) GN=mdoB PE=3 SV=1
ko00071	Fatty acid metabolism	comp68457_c0	csi-miR166e-5p_L-1R+1_1ss21GA	sp|P77802|YAGX_ECOLI Uncharacterized protein YagX OS=Escherichia coli (strain K12) GN=yagX PE=4 SV=1
ko00071	Fatty acid metabolism	comp68319_c0	bna-miR168a	sp|P77802|YAGX_ECOLI Uncharacterized protein YagX OS=Escherichia coli (strain K12) GN=yagX PE=4 SV=1
ko00071	Fatty acid metabolism	comp62562_c0	bna-miR168a	sp|B7MNB1|OPGB_ECO45 Phosphoglycerol transferase I OS=Escherichia coli O45:K1 (strain S88 / ExPEC) GN=mdoB PE=3 SV=1
ko00071	Fatty acid metabolism	comp64825_c1	bna-miR168a	sp|P48977|ADH_MALDO Alcohol dehydrogenase OS=Malus domestica GN=ADH PE=2 SV=1
ko00071	Fatty acid metabolism	comp68419_c0	gma-MIR828a-p3_2ss3AC18CA	sp|P52647|NIFJ_ECOLI Probable pyruvate-flavodoxin oxidoreductase OS=Escherichia coli (strain K12) GN=ydbK PE=3 SV=2
ko00071	Fatty acid metabolism	comp68419_c0	gma-MIR828a-p3_2ss3AC18CA	sp|P52647|NIFJ_ECOLI Probable pyruvate-flavodoxin oxidoreductase OS=Escherichia coli (strain K12) GN=ydbK PE=3 SV=2
ko00071	Fatty acid metabolism	comp68419_c0	gma-MIR828a-p3_2ss3AC18CA	sp|P52647|NIFJ_ECOLI Probable pyruvate-flavodoxin oxidoreductase OS=Escherichia coli (strain K12) GN=ydbK PE=3 SV=2
ko00071	Fatty acid metabolism	comp68457_c0	gma-MIR828a-p3_2ss3AC18CA	sp|P77802|YAGX_ECOLI Uncharacterized protein YagX OS=Escherichia coli (strain K12) GN=yagX PE=4 SV=1
ko00071	Fatty acid metabolism	comp68457_c0	gma-MIR828a-p3_2ss3AC18CA	sp|P77802|YAGX_ECOLI Uncharacterized protein YagX OS=Escherichia coli (strain K12) GN=yagX PE=4 SV=1
ko00071	Fatty acid metabolism	comp26573_c0	gma-MIR828a-p3_2ss3AC18CA	sp|Q9SK86|ADHL1_ARATH Alcohol dehydrogenase-like 1 OS=Arabidopsis thaliana GN=At1g22430 PE=2 SV=1
ko00071	Fatty acid metabolism	comp36715_c0	gma-MIR828a-p3_2ss3AC18CA	sp|Q8S528|AL2B7_ARATH Aldehyde dehydrogenase family 2 member B7, mitochondrial OS=Arabidopsis thaliana GN=ALDH2B7 PE=2 SV=2
ko00071	Fatty acid metabolism	comp64577_c0	gma-MIR828a-p3_2ss3AC18CA	sp|P0ABD0|BETT_ECO57 High-affinity choline transport protein OS=Escherichia coli O157:H7 GN=betT PE=3 SV=1
ko00071	Fatty acid metabolism	comp64577_c0	gma-MIR828a-p3_2ss3AC18CA	sp|P0ABD0|BETT_ECO57 High-affinity choline transport protein OS=Escherichia coli O157:H7 GN=betT PE=3 SV=1
ko00071	Fatty acid metabolism	comp68419_c0	mtr-MIR2592bj-p3_2ss12TC19AT_2	sp|P52647|NIFJ_ECOLI Probable pyruvate-flavodoxin oxidoreductase OS=Escherichia coli (strain K12) GN=ydbK PE=3 SV=2
ko00071	Fatty acid metabolism	comp68419_c0	hbr-miR398_2ss9CT21GC	sp|P52647|NIFJ_ECOLI Probable pyruvate-flavodoxin oxidoreductase OS=Escherichia coli (strain K12) GN=ydbK PE=3 SV=2
ko00071	Fatty acid metabolism	comp61400_c0	ath-MIR5645b-p5_2ss18TG20TA	sp|F4HUK6|AAE1_ARATH Probable acyl-activating enzyme 1, peroxisomal OS=Arabidopsis thaliana GN=AAE1 PE=2 SV=1
ko00071	Fatty acid metabolism	comp68419_c0	ath-miR858b	sp|P52647|NIFJ_ECOLI Probable pyruvate-flavodoxin oxidoreductase OS=Escherichia coli (strain K12) GN=ydbK PE=3 SV=2
ko00071	Fatty acid metabolism	comp68319_c0	ath-miR858b	sp|P77802|YAGX_ECOLI Uncharacterized protein YagX OS=Escherichia coli (strain K12) GN=yagX PE=4 SV=1
ko00071	Fatty acid metabolism	comp43617_c0	rgl-miR5139_L-1	sp|A7ZIA4|FRMA_ECO24 S-(hydroxymethyl)glutathione dehydrogenase OS=Escherichia coli O139:H28 (strain E24377A / ETEC) GN=frmA PE=3 SV=1
ko00071	Fatty acid metabolism	comp62308_c0	rgl-miR5139_L-1	-
ko00071	Fatty acid metabolism	comp62562_c0	rgl-miR5139_L-1	sp|B7MNB1|OPGB_ECO45 Phosphoglycerol transferase I OS=Escherichia coli O45:K1 (strain S88 / ExPEC) GN=mdoB PE=3 SV=1
ko00071	Fatty acid metabolism	comp61688_c0	ama-miR156_L+5R-2	sp|Q96329|ACOX4_ARATH Acyl-coenzyme A oxidase 4, peroxisomal OS=Arabidopsis thaliana GN=ACX4 PE=1 SV=1
ko00071	Fatty acid metabolism	comp68457_c0	gma-miR408a-3p_L-1R+1	sp|P77802|YAGX_ECOLI Uncharacterized protein YagX OS=Escherichia coli (strain K12) GN=yagX PE=4 SV=1
ko00071	Fatty acid metabolism	comp66752_c0	gma-miR408a-3p_L-1R+1	sp|Q8S4Y1|THIC1_ARATH Acetyl-CoA acetyltransferase, cytosolic 1 OS=Arabidopsis thaliana GN=AAT1 PE=2 SV=1
ko00071	Fatty acid metabolism	comp64577_c0	ghr-MIR7499-p3_2ss10GC17CG	sp|P0ABD0|BETT_ECO57 High-affinity choline transport protein OS=Escherichia coli O157:H7 GN=betT PE=3 SV=1
ko00071	Fatty acid metabolism	comp55523_c0	ghr-MIR7499-p3_2ss10GC17CG	sp|Q8XA34|CAIC_ECO57 Probable crotonobetaine/carnitine-CoA ligase OS=Escherichia coli O157:H7 GN=caiC PE=3 SV=2
ko00071	Fatty acid metabolism	comp68457_c0	ptc-miR6478_R+2_1ss21GA	sp|P77802|YAGX_ECOLI Uncharacterized protein YagX OS=Escherichia coli (strain K12) GN=yagX PE=4 SV=1
ko00071	Fatty acid metabolism	comp68457_c0	col-miRn-5p-32910_149	sp|P77802|YAGX_ECOLI Uncharacterized protein YagX OS=Escherichia coli (strain K12) GN=yagX PE=4 SV=1
ko00071	Fatty acid metabolism	comp55523_c0	col-miRn-5p-32910_149	sp|Q8XA34|CAIC_ECO57 Probable crotonobetaine/carnitine-CoA ligase OS=Escherichia coli O157:H7 GN=caiC PE=3 SV=2
ko00071	Fatty acid metabolism	comp67596_c0	ath-MIR5645b-p3_2ss19TG21TC	sp|Q8W471|AAE15_ARATH Long-chain-fatty-acid--[acyl-carrier-protein] ligase AEE15, chloroplastic OS=Arabidopsis thaliana GN=AAE15 PE=1 SV=1
ko00071	Fatty acid metabolism	comp68419_c0	cpa-miR160c-3p	sp|P52647|NIFJ_ECOLI Probable pyruvate-flavodoxin oxidoreductase OS=Escherichia coli (strain K12) GN=ydbK PE=3 SV=2
ko00071	Fatty acid metabolism	comp68319_c0	vun-miR169	sp|P77802|YAGX_ECOLI Uncharacterized protein YagX OS=Escherichia coli (strain K12) GN=yagX PE=4 SV=1
ko00071	Fatty acid metabolism	comp55523_c0	vun-miR169	sp|Q8XA34|CAIC_ECO57 Probable crotonobetaine/carnitine-CoA ligase OS=Escherichia coli O157:H7 GN=caiC PE=3 SV=2
ko00071	Fatty acid metabolism	comp68457_c0	csi-miR166e-5p	sp|P77802|YAGX_ECOLI Uncharacterized protein YagX OS=Escherichia coli (strain K12) GN=yagX PE=4 SV=1
ko00071	Fatty acid metabolism	comp68419_c0	csi-miR166e-5p	sp|P52647|NIFJ_ECOLI Probable pyruvate-flavodoxin oxidoreductase OS=Escherichia coli (strain K12) GN=ydbK PE=3 SV=2
ko00071	Fatty acid metabolism	comp68319_c0	aly-miR171c-5p_2ss1AG21CA	sp|P77802|YAGX_ECOLI Uncharacterized protein YagX OS=Escherichia coli (strain K12) GN=yagX PE=4 SV=1
ko00071	Fatty acid metabolism	comp68457_c0	aly-miR166g-5p_2ss10TG20GT	sp|P77802|YAGX_ECOLI Uncharacterized protein YagX OS=Escherichia coli (strain K12) GN=yagX PE=4 SV=1
ko00071	Fatty acid metabolism	comp67112_c0	aly-miR166g-5p_2ss10TG20GT	sp|Q9SHJ8|HIBC8_ARATH 3-hydroxyisobutyryl-CoA hydrolase-like protein 5 OS=Arabidopsis thaliana GN=At1g06550 PE=2 SV=2
ko00071	Fatty acid metabolism	comp68419_c0	htu-miR160a_R+1	sp|P52647|NIFJ_ECOLI Probable pyruvate-flavodoxin oxidoreductase OS=Escherichia coli (strain K12) GN=ydbK PE=3 SV=2
ko00071	Fatty acid metabolism	comp68457_c0	dpr-miR408_L-1	sp|P77802|YAGX_ECOLI Uncharacterized protein YagX OS=Escherichia coli (strain K12) GN=yagX PE=4 SV=1
ko00071	Fatty acid metabolism	comp66752_c0	dpr-miR408_L-1	sp|Q8S4Y1|THIC1_ARATH Acetyl-CoA acetyltransferase, cytosolic 1 OS=Arabidopsis thaliana GN=AAT1 PE=2 SV=1
ko00071	Fatty acid metabolism	comp55523_c0	dpr-miR408_L-1	sp|Q8XA34|CAIC_ECO57 Probable crotonobetaine/carnitine-CoA ligase OS=Escherichia coli O157:H7 GN=caiC PE=3 SV=2
ko00071	Fatty acid metabolism	comp68419_c0	ptc-miR172b-5p	sp|P52647|NIFJ_ECOLI Probable pyruvate-flavodoxin oxidoreductase OS=Escherichia coli (strain K12) GN=ydbK PE=3 SV=2
ko00071	Fatty acid metabolism	comp64818_c0	ptc-miR172b-5p	sp|P0CZ23|ACOX3_ARATH Acyl-coenzyme A oxidase 3, peroxisomal OS=Arabidopsis thaliana GN=ACX3 PE=1 SV=1
ko00071	Fatty acid metabolism	comp43617_c0	ssl-miR397_1ss2CA	sp|A7ZIA4|FRMA_ECO24 S-(hydroxymethyl)glutathione dehydrogenase OS=Escherichia coli O139:H28 (strain E24377A / ETEC) GN=frmA PE=3 SV=1
ko00071	Fatty acid metabolism	comp66899_c1	ama-miR396-5p_1ss21TG	sp|Q9SU63|AL2B4_ARATH Aldehyde dehydrogenase family 2 member B4, mitochondrial OS=Arabidopsis thaliana GN=ALDH2B4 PE=2 SV=1
ko00071	Fatty acid metabolism	comp68319_c0	lja-miR390a-3p_1ss8CT	sp|P77802|YAGX_ECOLI Uncharacterized protein YagX OS=Escherichia coli (strain K12) GN=yagX PE=4 SV=1
ko00071	Fatty acid metabolism	comp68319_c0	lja-miR390a-3p_1ss8CT	sp|P77802|YAGX_ECOLI Uncharacterized protein YagX OS=Escherichia coli (strain K12) GN=yagX PE=4 SV=1
ko00071	Fatty acid metabolism	comp68304_c0	lus-MIR156a-p3_1ss21CT	sp|Q96329|ACOX4_ARATH Acyl-coenzyme A oxidase 4, peroxisomal OS=Arabidopsis thaliana GN=ACX4 PE=1 SV=1
ko00071	Fatty acid metabolism	comp68457_c0	lus-MIR156a-p3_1ss21CT	sp|P77802|YAGX_ECOLI Uncharacterized protein YagX OS=Escherichia coli (strain K12) GN=yagX PE=4 SV=1
ko00071	Fatty acid metabolism	comp55523_c0	lus-MIR156a-p3_1ss21CT	sp|Q8XA34|CAIC_ECO57 Probable crotonobetaine/carnitine-CoA ligase OS=Escherichia coli O157:H7 GN=caiC PE=3 SV=2
ko00071	Fatty acid metabolism	comp68457_c0	gra-miR167a_L-2R+2	sp|P77802|YAGX_ECOLI Uncharacterized protein YagX OS=Escherichia coli (strain K12) GN=yagX PE=4 SV=1
ko00071	Fatty acid metabolism	comp68457_c0	gra-miR167a_L-2R+2	sp|P77802|YAGX_ECOLI Uncharacterized protein YagX OS=Escherichia coli (strain K12) GN=yagX PE=4 SV=1
ko00071	Fatty acid metabolism	comp68457_c0	gra-miR167a_L-2R+2	sp|P77802|YAGX_ECOLI Uncharacterized protein YagX OS=Escherichia coli (strain K12) GN=yagX PE=4 SV=1
ko00071	Fatty acid metabolism	comp66899_c1	amg-miR396	sp|Q9SU63|AL2B4_ARATH Aldehyde dehydrogenase family 2 member B4, mitochondrial OS=Arabidopsis thaliana GN=ALDH2B4 PE=2 SV=1
ko00071	Fatty acid metabolism	comp68419_c0	aly-miR171c-5p_1ss5AG	sp|P52647|NIFJ_ECOLI Probable pyruvate-flavodoxin oxidoreductase OS=Escherichia coli (strain K12) GN=ydbK PE=3 SV=2
ko00071	Fatty acid metabolism	comp63816_c0	cpa-miR164d	sp|Q9FFE9|AAE6_ARATH Probable acyl-activating enzyme 6 OS=Arabidopsis thaliana GN=AAE6 PE=2 SV=1
ko00071	Fatty acid metabolism	comp64577_c0	dpr-miR167a_L-2R+3	sp|P0ABD0|BETT_ECO57 High-affinity choline transport protein OS=Escherichia coli O157:H7 GN=betT PE=3 SV=1
ko00071	Fatty acid metabolism	comp61518_c0	hpe-miR166a	sp|Q56WD9|THIK2_ARATH 3-ketoacyl-CoA thiolase 2, peroxisomal OS=Arabidopsis thaliana GN=PED1 PE=1 SV=2
ko00071	Fatty acid metabolism	comp68419_c0	lja-miR171c	sp|P52647|NIFJ_ECOLI Probable pyruvate-flavodoxin oxidoreductase OS=Escherichia coli (strain K12) GN=ydbK PE=3 SV=2
ko00071	Fatty acid metabolism	comp68419_c0	gma-miR319a	sp|P52647|NIFJ_ECOLI Probable pyruvate-flavodoxin oxidoreductase OS=Escherichia coli (strain K12) GN=ydbK PE=3 SV=2
ko00071	Fatty acid metabolism	comp68319_c0	col-miRn-5p-46619_106	sp|P77802|YAGX_ECOLI Uncharacterized protein YagX OS=Escherichia coli (strain K12) GN=yagX PE=4 SV=1
ko00071	Fatty acid metabolism	comp64597_c0	mes-MIR477g-p5_1ss1CT	sp|O65202|ACOX1_ARATH Peroxisomal acyl-coenzyme A oxidase 1 OS=Arabidopsis thaliana GN=ACX1 PE=1 SV=1
ko00071	Fatty acid metabolism	comp68419_c0	ahy-miR167-3p_2ss8GA15TC	sp|P52647|NIFJ_ECOLI Probable pyruvate-flavodoxin oxidoreductase OS=Escherichia coli (strain K12) GN=ydbK PE=3 SV=2
ko00071	Fatty acid metabolism	comp68319_c0	nta-miR172d	sp|P77802|YAGX_ECOLI Uncharacterized protein YagX OS=Escherichia coli (strain K12) GN=yagX PE=4 SV=1
ko00071	Fatty acid metabolism	comp32791_c0	ppe-miR172a-5p_1ss21GA	sp|Q8S4Y1|THIC1_ARATH Acetyl-CoA acetyltransferase, cytosolic 1 OS=Arabidopsis thaliana GN=AAT1 PE=2 SV=1
ko00071	Fatty acid metabolism	comp65163_c0	ama-miR396-5p	sp|Q8LPS1|LACS6_ARATH Long chain acyl-CoA synthetase 6, peroxisomal OS=Arabidopsis thaliana GN=LACS6 PE=1 SV=1
ko00071	Fatty acid metabolism	comp65163_c0	ama-miR396-5p	sp|Q8LPS1|LACS6_ARATH Long chain acyl-CoA synthetase 6, peroxisomal OS=Arabidopsis thaliana GN=LACS6 PE=1 SV=1
ko00071	Fatty acid metabolism	comp68419_c0	cpa-miR164a	sp|P52647|NIFJ_ECOLI Probable pyruvate-flavodoxin oxidoreductase OS=Escherichia coli (strain K12) GN=ydbK PE=3 SV=2
ko00071	Fatty acid metabolism	comp62562_c0	cpa-miR164a	sp|B7MNB1|OPGB_ECO45 Phosphoglycerol transferase I OS=Escherichia coli O45:K1 (strain S88 / ExPEC) GN=mdoB PE=3 SV=1
ko00071	Fatty acid metabolism	comp62515_c0	col-miRn-5p-17637_256	sp|Q70E96|AL3F1_ARATH Aldehyde dehydrogenase family 3 member F1 OS=Arabidopsis thaliana GN=ALDH3F1 PE=2 SV=2
ko00071	Fatty acid metabolism	comp68457_c0	aly-miR171b-3p_1ss19AG	sp|P77802|YAGX_ECOLI Uncharacterized protein YagX OS=Escherichia coli (strain K12) GN=yagX PE=4 SV=1
ko00071	Fatty acid metabolism	comp68419_c0	aly-miR171b-3p_1ss19AG	sp|P52647|NIFJ_ECOLI Probable pyruvate-flavodoxin oxidoreductase OS=Escherichia coli (strain K12) GN=ydbK PE=3 SV=2
ko00071	Fatty acid metabolism	comp64577_c0	aqc-MIR172b-p3_1ss9TC	sp|P0ABD0|BETT_ECO57 High-affinity choline transport protein OS=Escherichia coli O157:H7 GN=betT PE=3 SV=1
ko00071	Fatty acid metabolism	comp68419_c0	lja-miR171d-3p	sp|P52647|NIFJ_ECOLI Probable pyruvate-flavodoxin oxidoreductase OS=Escherichia coli (strain K12) GN=ydbK PE=3 SV=2
ko00071	Fatty acid metabolism	comp68419_c0	lja-miR171d-3p	sp|P52647|NIFJ_ECOLI Probable pyruvate-flavodoxin oxidoreductase OS=Escherichia coli (strain K12) GN=ydbK PE=3 SV=2
ko00071	Fatty acid metabolism	comp65870_c0	lja-miR171d-3p	sp|Q0V7W6|ADHL5_ARATH Alcohol dehydrogenase-like 5 OS=Arabidopsis thaliana GN=At4g22110 PE=2 SV=1
ko00071	Fatty acid metabolism	comp66899_c1	lja-miR171d-3p	sp|Q9SU63|AL2B4_ARATH Aldehyde dehydrogenase family 2 member B4, mitochondrial OS=Arabidopsis thaliana GN=ALDH2B4 PE=2 SV=1
ko00071	Fatty acid metabolism	comp55523_c0	sly-miR164a-3p_2ss9TC12TC	sp|Q8XA34|CAIC_ECO57 Probable crotonobetaine/carnitine-CoA ligase OS=Escherichia coli O157:H7 GN=caiC PE=3 SV=2
ko00071	Fatty acid metabolism	comp68319_c0	cca-miR396a-3p_2ss7GT21AG	sp|P77802|YAGX_ECOLI Uncharacterized protein YagX OS=Escherichia coli (strain K12) GN=yagX PE=4 SV=1
ko00071	Fatty acid metabolism	comp49242_c0	mtr-MIR2592bj-p3_2ss12TC19AT_1	sp|Q8S528|AL2B7_ARATH Aldehyde dehydrogenase family 2 member B7, mitochondrial OS=Arabidopsis thaliana GN=ALDH2B7 PE=2 SV=2
ko00071	Fatty acid metabolism	comp68419_c0	mtr-MIR2592bj-p3_2ss12TC19AT_1	sp|P52647|NIFJ_ECOLI Probable pyruvate-flavodoxin oxidoreductase OS=Escherichia coli (strain K12) GN=ydbK PE=3 SV=2
ko00071	Fatty acid metabolism	comp26573_c0	mtr-MIR2592bj-p3_2ss12TC19AT_1	sp|Q9SK86|ADHL1_ARATH Alcohol dehydrogenase-like 1 OS=Arabidopsis thaliana GN=At1g22430 PE=2 SV=1
ko00071	Fatty acid metabolism	comp68319_c0	ath-miR172a	sp|P77802|YAGX_ECOLI Uncharacterized protein YagX OS=Escherichia coli (strain K12) GN=yagX PE=4 SV=1
ko00071	Fatty acid metabolism	comp67596_c0	ath-MIR5645b-p5_2ss19TG21TC	sp|Q8W471|AAE15_ARATH Long-chain-fatty-acid--[acyl-carrier-protein] ligase AEE15, chloroplastic OS=Arabidopsis thaliana GN=AAE15 PE=1 SV=1
ko00071	Fatty acid metabolism	comp65870_c0	gma-MIR5368-p3_1ss21CT	sp|Q0V7W6|ADHL5_ARATH Alcohol dehydrogenase-like 5 OS=Arabidopsis thaliana GN=At4g22110 PE=2 SV=1
ko00071	Fatty acid metabolism	comp62562_c0	ptc-miR1448_L+1R+1	sp|B7MNB1|OPGB_ECO45 Phosphoglycerol transferase I OS=Escherichia coli O45:K1 (strain S88 / ExPEC) GN=mdoB PE=3 SV=1
ko00071	Fatty acid metabolism	comp68319_c0	rco-miR167a_R+1	sp|P77802|YAGX_ECOLI Uncharacterized protein YagX OS=Escherichia coli (strain K12) GN=yagX PE=4 SV=1
ko00071	Fatty acid metabolism	comp62562_c0	ccl-miR171	sp|B7MNB1|OPGB_ECO45 Phosphoglycerol transferase I OS=Escherichia coli O45:K1 (strain S88 / ExPEC) GN=mdoB PE=3 SV=1
ko00071	Fatty acid metabolism	comp62562_c0	ccl-miR171	sp|B7MNB1|OPGB_ECO45 Phosphoglycerol transferase I OS=Escherichia coli O45:K1 (strain S88 / ExPEC) GN=mdoB PE=3 SV=1
ko00062	Fatty acid elongation in mitochondria	comp66927_c0	pvu-miR159a.1	-
ko00620	Pyruvate metabolism	comp68387_c0	mdm-MIR391-p5_2ss16CT20GA	sp|P77748|YDIJ_ECOLI Uncharacterized protein YdiJ OS=Escherichia coli (strain K12) GN=ydiJ PE=4 SV=1
ko00620	Pyruvate metabolism	comp68555_c0	mdm-MIR391-p5_2ss16CT20GA	sp|P77783|YNFF_ECOLI Probable dimethyl sulfoxide reductase chain YnfF OS=Escherichia coli (strain K12) GN=ynfF PE=1 SV=4
ko00620	Pyruvate metabolism	comp64577_c0	mdm-MIR391-p5_2ss16CT20GA	sp|P0ABD0|BETT_ECO57 High-affinity choline transport protein OS=Escherichia coli O157:H7 GN=betT PE=3 SV=1
ko00620	Pyruvate metabolism	comp66257_c0	csi-miR1515_1ss16AG	sp|Q38970|ACC1_ARATH Acetyl-CoA carboxylase 1 OS=Arabidopsis thaliana GN=ACC1 PE=1 SV=1
ko00620	Pyruvate metabolism	comp68457_c0	bol-miR171a_1ss19AG	sp|P77802|YAGX_ECOLI Uncharacterized protein YagX OS=Escherichia coli (strain K12) GN=yagX PE=4 SV=1
ko00620	Pyruvate metabolism	comp68108_c0	bol-miR171a_1ss19AG	sp|B1IW07|MUKB_ECOLC Chromosome partition protein MukB OS=Escherichia coli (strain ATCC 8739 / DSM 1576 / Crooks) GN=mukB PE=3 SV=1
ko00620	Pyruvate metabolism	comp68419_c0	bol-miR171a_1ss19AG	sp|P52647|NIFJ_ECOLI Probable pyruvate-flavodoxin oxidoreductase OS=Escherichia coli (strain K12) GN=ydbK PE=3 SV=2
ko00620	Pyruvate metabolism	comp68319_c0	col-miRn-3p-16403_272	sp|P77802|YAGX_ECOLI Uncharacterized protein YagX OS=Escherichia coli (strain K12) GN=yagX PE=4 SV=1
ko00620	Pyruvate metabolism	comp68319_c0	col-miRn-3p-16403_272	sp|P77802|YAGX_ECOLI Uncharacterized protein YagX OS=Escherichia coli (strain K12) GN=yagX PE=4 SV=1
ko00620	Pyruvate metabolism	comp65140_c0	col-miRn-3p-16403_272	sp|P0AEZ8|MLTD_ECOL6 Membrane-bound lytic murein transglycosylase D OS=Escherichia coli O6:H1 (strain CFT073 / ATCC 700928 / UPEC) GN=mltD PE=3 SV=1
ko00620	Pyruvate metabolism	comp62562_c0	col-miRn-3p-253727_10	sp|B7MNB1|OPGB_ECO45 Phosphoglycerol transferase I OS=Escherichia coli O45:K1 (strain S88 / ExPEC) GN=mdoB PE=3 SV=1
ko00620	Pyruvate metabolism	comp344019_c0	col-miRn-3p-253727_10	sp|A4W6H9|LEU1_ENT38 2-isopropylmalate synthase OS=Enterobacter sp. (strain 638) GN=leuA PE=3 SV=1
ko00620	Pyruvate metabolism	comp60159_c0	col-miRn-3p-253727_10	sp|P52903|ODPA_SOLTU Pyruvate dehydrogenase E1 component subunit alpha, mitochondrial OS=Solanum tuberosum PE=1 SV=1
ko00620	Pyruvate metabolism	comp68300_c0	csi-miR162-5p_L-1_1ss5GC	sp|B1IW07|MUKB_ECOLC Chromosome partition protein MukB OS=Escherichia coli (strain ATCC 8739 / DSM 1576 / Crooks) GN=mukB PE=3 SV=1
ko00620	Pyruvate metabolism	comp53493_c0	csi-miR162-5p_L-1_1ss5GC	sp|P08997|MASY_ECOLI Malate synthase A OS=Escherichia coli (strain K12) GN=aceB PE=1 SV=1
ko00620	Pyruvate metabolism	comp68300_c0	col-miRn-3p-145806_25	sp|B1IW07|MUKB_ECOLC Chromosome partition protein MukB OS=Escherichia coli (strain ATCC 8739 / DSM 1576 / Crooks) GN=mukB PE=3 SV=1
ko00620	Pyruvate metabolism	comp64577_c0	col-miRn-3p-145806_25	sp|P0ABD0|BETT_ECO57 High-affinity choline transport protein OS=Escherichia coli O157:H7 GN=betT PE=3 SV=1
ko00620	Pyruvate metabolism	comp31487_c0	col-miRn-3p-145806_25	sp|Q9FIK7|THIC2_ARATH Probable acetyl-CoA acetyltransferase, cytosolic 2 OS=Arabidopsis thaliana GN=At5g47720 PE=2 SV=1
ko00620	Pyruvate metabolism	comp31487_c0	col-miRn-3p-145806_25	sp|Q9FIK7|THIC2_ARATH Probable acetyl-CoA acetyltransferase, cytosolic 2 OS=Arabidopsis thaliana GN=At5g47720 PE=2 SV=1
ko00620	Pyruvate metabolism	comp68108_c0	col-miRn-3p-145806_25	sp|B1IW07|MUKB_ECOLC Chromosome partition protein MukB OS=Escherichia coli (strain ATCC 8739 / DSM 1576 / Crooks) GN=mukB PE=3 SV=1
ko00620	Pyruvate metabolism	comp67052_c0	ppe-miR399b_L-2R+2	sp|Q42910|PPDK_MESCR Pyruvate, phosphate dikinase, chloroplastic OS=Mesembryanthemum crystallinum GN=PPD PE=2 SV=1
ko00620	Pyruvate metabolism	comp59939_c1	ppe-miR399b_L-2R+2	sp|Q38970|ACC1_ARATH Acetyl-CoA carboxylase 1 OS=Arabidopsis thaliana GN=ACC1 PE=1 SV=1
ko00620	Pyruvate metabolism	comp68457_c0	ppe-miR399b_L-2R+2	sp|P77802|YAGX_ECOLI Uncharacterized protein YagX OS=Escherichia coli (strain K12) GN=yagX PE=4 SV=1
ko00620	Pyruvate metabolism	comp55426_c0	ppe-miR399b_L-2R+2	sp|Q8W033|AL3I1_ARATH Aldehyde dehydrogenase family 3 member I1, chloroplastic OS=Arabidopsis thaliana GN=ALDH3I1 PE=2 SV=2
ko00620	Pyruvate metabolism	comp67573_c1	ppe-miR399b_L-2R+2	sp|P34105|MAOX_POPTR NADP-dependent malic enzyme OS=Populus trichocarpa PE=2 SV=3
ko00620	Pyruvate metabolism	comp62562_c0	crt-miR168_L-2	sp|B7MNB1|OPGB_ECO45 Phosphoglycerol transferase I OS=Escherichia coli O45:K1 (strain S88 / ExPEC) GN=mdoB PE=3 SV=1
ko00620	Pyruvate metabolism	comp62562_c0	crt-miR168_L-2	sp|B7MNB1|OPGB_ECO45 Phosphoglycerol transferase I OS=Escherichia coli O45:K1 (strain S88 / ExPEC) GN=mdoB PE=3 SV=1
ko00620	Pyruvate metabolism	comp68319_c0	crt-miR168_L-2	sp|P77802|YAGX_ECOLI Uncharacterized protein YagX OS=Escherichia coli (strain K12) GN=yagX PE=4 SV=1
ko00620	Pyruvate metabolism	comp68108_c0	crt-miR168_L-2	sp|B1IW07|MUKB_ECOLC Chromosome partition protein MukB OS=Escherichia coli (strain ATCC 8739 / DSM 1576 / Crooks) GN=mukB PE=3 SV=1
ko00620	Pyruvate metabolism	comp68108_c0	crt-miR168_L-2	sp|B1IW07|MUKB_ECOLC Chromosome partition protein MukB OS=Escherichia coli (strain ATCC 8739 / DSM 1576 / Crooks) GN=mukB PE=3 SV=1
ko00620	Pyruvate metabolism	comp68108_c0	crt-miR168_L-2	sp|B1IW07|MUKB_ECOLC Chromosome partition protein MukB OS=Escherichia coli (strain ATCC 8739 / DSM 1576 / Crooks) GN=mukB PE=3 SV=1
ko00620	Pyruvate metabolism	comp605693_c0	crt-miR168_L-2	sp|O68040|ACSA_RHOCB Acetyl-coenzyme A synthetase OS=Rhodobacter capsulatus (strain ATCC BAA-309 / NBRC 16581 / SB1003) GN=acsA PE=3 SV=1
ko00620	Pyruvate metabolism	comp68457_c0	crt-miR168_L-2	sp|P77802|YAGX_ECOLI Uncharacterized protein YagX OS=Escherichia coli (strain K12) GN=yagX PE=4 SV=1
ko00620	Pyruvate metabolism	comp62043_c0	crt-miR168_L-2	sp|Q42533|BCCP1_ARATH Biotin carboxyl carrier protein of acetyl-CoA carboxylase 1, chloroplastic OS=Arabidopsis thaliana GN=BCCP1 PE=1 SV=2
ko00620	Pyruvate metabolism	comp63693_c0	ptc-miR172a	sp|P46487|MDHM_EUCGU Malate dehydrogenase, mitochondrial OS=Eucalyptus gunnii GN=MDH PE=2 SV=1
ko00620	Pyruvate metabolism	comp63301_c0	ptc-miR172a	-
ko00620	Pyruvate metabolism	comp68319_c0	ptc-miR172a	sp|P77802|YAGX_ECOLI Uncharacterized protein YagX OS=Escherichia coli (strain K12) GN=yagX PE=4 SV=1
ko00620	Pyruvate metabolism	comp59072_c0	ptc-miR172a	sp|P42630|TDCG_ECOLI L-serine dehydratase TdcG OS=Escherichia coli (strain K12) GN=tdcG PE=1 SV=4
ko00620	Pyruvate metabolism	comp67128_c0	aly-miR169b-3p_2ss12C-15CT	sp|Q9SU63|AL2B4_ARATH Aldehyde dehydrogenase family 2 member B4, mitochondrial OS=Arabidopsis thaliana GN=ALDH2B4 PE=2 SV=1
ko00620	Pyruvate metabolism	comp67000_c0	col-miRn-3p-18781_243	sp|Q9T074|PCKA_ARATH Phosphoenolpyruvate carboxykinase [ATP] OS=Arabidopsis thaliana GN=PCKA PE=1 SV=1
ko00620	Pyruvate metabolism	comp68457_c0	sly-miR319c-5p_2ss8CT15CT	sp|P77802|YAGX_ECOLI Uncharacterized protein YagX OS=Escherichia coli (strain K12) GN=yagX PE=4 SV=1
ko00620	Pyruvate metabolism	comp58356_c0	sly-miR319c-5p_2ss8CT15CT	sp|P32670|PTFX2_ECOLI Multiphosphoryl transfer protein 2 OS=Escherichia coli (strain K12) GN=ptsA PE=3 SV=2
ko00620	Pyruvate metabolism	comp65872_c0	sly-miR319c-5p_2ss8CT15CT	sp|P17783|MDHM_CITLA Malate dehydrogenase, mitochondrial OS=Citrullus lanatus GN=MMDH PE=1 SV=1
ko00620	Pyruvate metabolism	comp67268_c0	sly-miR319c-5p_2ss8CT15CT	sp|P42632|TDCE_ECOLI PFL-like enzyme TdcE OS=Escherichia coli (strain K12) GN=tdcE PE=1 SV=2
ko00620	Pyruvate metabolism	comp59939_c1	mes-miR156a	sp|Q38970|ACC1_ARATH Acetyl-CoA carboxylase 1 OS=Arabidopsis thaliana GN=ACC1 PE=1 SV=1
ko00620	Pyruvate metabolism	comp64928_c0	hbr-MIR159b-p5_1ss10GT	sp|B9DGD6|ACS_ARATH Acetate--CoA ligase ACS, chloroplastic/glyoxysomal OS=Arabidopsis thaliana GN=ACS PE=1 SV=1
ko00620	Pyruvate metabolism	comp68555_c0	mtr-miR156a_L+1R-1_1ss4AC	sp|P77783|YNFF_ECOLI Probable dimethyl sulfoxide reductase chain YnfF OS=Escherichia coli (strain K12) GN=ynfF PE=1 SV=4
ko00620	Pyruvate metabolism	comp67101_c0	htu-miR393a_R-1_1ss21CT	sp|P76129|DOSP_ECOLI Oxygen sensor protein DosP OS=Escherichia coli (strain K12) GN=dosP PE=1 SV=4
ko00620	Pyruvate metabolism	comp67101_c0	htu-miR393a_R-1_1ss21CT	sp|P76129|DOSP_ECOLI Oxygen sensor protein DosP OS=Escherichia coli (strain K12) GN=dosP PE=1 SV=4
ko00620	Pyruvate metabolism	comp59299_c0	htu-miR393a_R-1_1ss21CT	sp|A5VFP2|ACYP_SPHWW Acylphosphatase OS=Sphingomonas wittichii (strain RW1 / DSM 6014 / JCM 10273) GN=acyP PE=3 SV=1
ko00620	Pyruvate metabolism	comp66257_c0	htu-miR393a_R-1_1ss21CT	sp|Q38970|ACC1_ARATH Acetyl-CoA carboxylase 1 OS=Arabidopsis thaliana GN=ACC1 PE=1 SV=1
ko00620	Pyruvate metabolism	comp33183_c0	csi-miR172c_L-1_1ss6TA	sp|O24457|ODPA3_ARATH Pyruvate dehydrogenase E1 component subunit alpha-3, chloroplastic OS=Arabidopsis thaliana GN=PDH-E1 ALPHA PE=1 SV=1
ko00620	Pyruvate metabolism	comp64234_c0	csi-miR172c_L-1_1ss6TA	sp|Q42533|BCCP1_ARATH Biotin carboxyl carrier protein of acetyl-CoA carboxylase 1, chloroplastic OS=Arabidopsis thaliana GN=BCCP1 PE=1 SV=2
ko00620	Pyruvate metabolism	comp63693_c0	csi-miR172c_L-1_1ss6TA	sp|P46487|MDHM_EUCGU Malate dehydrogenase, mitochondrial OS=Eucalyptus gunnii GN=MDH PE=2 SV=1
ko00620	Pyruvate metabolism	comp68319_c0	csi-miR172c_L-1_1ss6TA	sp|P77802|YAGX_ECOLI Uncharacterized protein YagX OS=Escherichia coli (strain K12) GN=yagX PE=4 SV=1
ko00620	Pyruvate metabolism	comp59072_c0	csi-miR172c_L-1_1ss6TA	sp|P42630|TDCG_ECOLI L-serine dehydratase TdcG OS=Escherichia coli (strain K12) GN=tdcG PE=1 SV=4
ko00620	Pyruvate metabolism	comp68108_c0	pvu-miR159a.1	sp|B1IW07|MUKB_ECOLC Chromosome partition protein MukB OS=Escherichia coli (strain ATCC 8739 / DSM 1576 / Crooks) GN=mukB PE=3 SV=1
ko00620	Pyruvate metabolism	comp68457_c0	aly-MIR394a-p3_2ss16CA17TG	sp|P77802|YAGX_ECOLI Uncharacterized protein YagX OS=Escherichia coli (strain K12) GN=yagX PE=4 SV=1
ko00620	Pyruvate metabolism	comp28650_c0	aly-MIR394a-p3_2ss16CA17TG	sp|O65595|KPYC_ARATH Probable pyruvate kinase, cytosolic isozyme OS=Arabidopsis thaliana GN=At4g26390 PE=3 SV=1
ko00620	Pyruvate metabolism	comp68319_c0	aly-MIR394a-p3_2ss16CA17TG	sp|P77802|YAGX_ECOLI Uncharacterized protein YagX OS=Escherichia coli (strain K12) GN=yagX PE=4 SV=1
ko00620	Pyruvate metabolism	comp68319_c0	aly-MIR394a-p3_2ss16CA17TG	sp|P77802|YAGX_ECOLI Uncharacterized protein YagX OS=Escherichia coli (strain K12) GN=yagX PE=4 SV=1
ko00620	Pyruvate metabolism	comp63288_c0	aly-MIR394a-p3_2ss16CA17TG	sp|P46489|MDHP_FLABI Malate dehydrogenase [NADP], chloroplastic OS=Flaveria bidentis PE=1 SV=1
ko00620	Pyruvate metabolism	comp68387_c0	aly-MIR394a-p3_2ss16CA17TG	sp|P77748|YDIJ_ECOLI Uncharacterized protein YdiJ OS=Escherichia coli (strain K12) GN=ydiJ PE=4 SV=1
ko00620	Pyruvate metabolism	comp67101_c0	aly-MIR394a-p3_2ss16CA17TG	sp|P76129|DOSP_ECOLI Oxygen sensor protein DosP OS=Escherichia coli (strain K12) GN=dosP PE=1 SV=4
ko00620	Pyruvate metabolism	comp67999_c0	ppe-miR397_1ss10GC	sp|P77748|YDIJ_ECOLI Uncharacterized protein YdiJ OS=Escherichia coli (strain K12) GN=ydiJ PE=4 SV=1
ko00620	Pyruvate metabolism	comp66678_c0	bcy-miR156_L-1	sp|A7ZSD4|AAEB_ECO24 p-hydroxybenzoic acid efflux pump subunit AaeB OS=Escherichia coli O139:H28 (strain E24377A / ETEC) GN=aaeB PE=3 SV=1
ko00620	Pyruvate metabolism	comp68387_c0	bcy-miR156_L-1	sp|P77748|YDIJ_ECOLI Uncharacterized protein YdiJ OS=Escherichia coli (strain K12) GN=ydiJ PE=4 SV=1
ko00620	Pyruvate metabolism	comp68387_c0	bcy-miR156_L-1	sp|P77748|YDIJ_ECOLI Uncharacterized protein YdiJ OS=Escherichia coli (strain K12) GN=ydiJ PE=4 SV=1
ko00620	Pyruvate metabolism	comp68387_c0	bcy-miR156_L-1	sp|P77748|YDIJ_ECOLI Uncharacterized protein YdiJ OS=Escherichia coli (strain K12) GN=ydiJ PE=4 SV=1
ko00620	Pyruvate metabolism	comp67101_c0	bcy-miR156_L-1	sp|P76129|DOSP_ECOLI Oxygen sensor protein DosP OS=Escherichia coli (strain K12) GN=dosP PE=1 SV=4
ko00620	Pyruvate metabolism	comp68253_c0	ssl-miR171b	sp|Q9C550|LEU12_ARATH 2-isopropylmalate synthase 2, chloroplastic OS=Arabidopsis thaliana GN=IPMS2 PE=1 SV=1
ko00620	Pyruvate metabolism	comp68419_c0	ssl-miR171b	sp|P52647|NIFJ_ECOLI Probable pyruvate-flavodoxin oxidoreductase OS=Escherichia coli (strain K12) GN=ydbK PE=3 SV=2
ko00620	Pyruvate metabolism	comp64577_c0	ssl-miR171b	sp|P0ABD0|BETT_ECO57 High-affinity choline transport protein OS=Escherichia coli O157:H7 GN=betT PE=3 SV=1
ko00620	Pyruvate metabolism	comp68555_c0	mtr-miR156h-3p_1ss8AC	sp|P77783|YNFF_ECOLI Probable dimethyl sulfoxide reductase chain YnfF OS=Escherichia coli (strain K12) GN=ynfF PE=1 SV=4
ko00620	Pyruvate metabolism	comp68555_c0	mtr-miR156h-3p_1ss8AC	sp|P77783|YNFF_ECOLI Probable dimethyl sulfoxide reductase chain YnfF OS=Escherichia coli (strain K12) GN=ynfF PE=1 SV=4
ko00620	Pyruvate metabolism	comp58356_c0	mtr-miR156h-3p_1ss8AC	sp|P32670|PTFX2_ECOLI Multiphosphoryl transfer protein 2 OS=Escherichia coli (strain K12) GN=ptsA PE=3 SV=2
ko00620	Pyruvate metabolism	comp68419_c0	mtr-miR156h-3p_1ss8AC	sp|P52647|NIFJ_ECOLI Probable pyruvate-flavodoxin oxidoreductase OS=Escherichia coli (strain K12) GN=ydbK PE=3 SV=2
ko00620	Pyruvate metabolism	comp68300_c0	mtr-miR156h-3p_1ss8AC	sp|B1IW07|MUKB_ECOLC Chromosome partition protein MukB OS=Escherichia coli (strain ATCC 8739 / DSM 1576 / Crooks) GN=mukB PE=3 SV=1
ko00620	Pyruvate metabolism	comp67101_c0	mtr-miR156h-3p_1ss8AC	sp|P76129|DOSP_ECOLI Oxygen sensor protein DosP OS=Escherichia coli (strain K12) GN=dosP PE=1 SV=4
ko00620	Pyruvate metabolism	comp50760_c0	mtr-miR156h-3p_1ss8AC	sp|P36444|MAOC_FLAPR NADP-dependent malic enzyme, chloroplastic OS=Flaveria pringlei GN=MODA PE=2 SV=1
ko00620	Pyruvate metabolism	comp60238_c0	ath-MIR5645e-p5_2ss18TG20TG	sp|Q9M5K3|DLDH1_ARATH Dihydrolipoyl dehydrogenase 1, mitochondrial OS=Arabidopsis thaliana GN=LPD1 PE=1 SV=2
ko00620	Pyruvate metabolism	comp68387_c0	ath-MIR5645e-p5_2ss18TG20TG	sp|P77748|YDIJ_ECOLI Uncharacterized protein YdiJ OS=Escherichia coli (strain K12) GN=ydiJ PE=4 SV=1
ko00620	Pyruvate metabolism	comp67101_c0	ath-MIR5645e-p5_2ss18TG20TG	sp|P76129|DOSP_ECOLI Oxygen sensor protein DosP OS=Escherichia coli (strain K12) GN=dosP PE=1 SV=4
ko00620	Pyruvate metabolism	comp67268_c0	ath-MIR5645e-p5_2ss18TG20TG	sp|P42632|TDCE_ECOLI PFL-like enzyme TdcE OS=Escherichia coli (strain K12) GN=tdcE PE=1 SV=2
ko00620	Pyruvate metabolism	comp64222_c0	col-miRn-5p-2142_1228	sp|Q8GVE8|CAPP4_ARATH Phosphoenolpyruvate carboxylase 4 OS=Arabidopsis thaliana GN=PPC4 PE=2 SV=1
ko00620	Pyruvate metabolism	comp60238_c0	gma-MIR4393b-p3_2ss9AG18AG	sp|Q9M5K3|DLDH1_ARATH Dihydrolipoyl dehydrogenase 1, mitochondrial OS=Arabidopsis thaliana GN=LPD1 PE=1 SV=2
ko00620	Pyruvate metabolism	comp67268_c0	gma-MIR4393b-p3_2ss9AG18AG	sp|P42632|TDCE_ECOLI PFL-like enzyme TdcE OS=Escherichia coli (strain K12) GN=tdcE PE=1 SV=2
ko00620	Pyruvate metabolism	comp68387_c0	gma-MIR4393b-p3_2ss9AG18AG	sp|P77748|YDIJ_ECOLI Uncharacterized protein YdiJ OS=Escherichia coli (strain K12) GN=ydiJ PE=4 SV=1
ko00620	Pyruvate metabolism	comp68300_c0	gma-MIR4393b-p3_2ss9AG18AG	sp|B1IW07|MUKB_ECOLC Chromosome partition protein MukB OS=Escherichia coli (strain ATCC 8739 / DSM 1576 / Crooks) GN=mukB PE=3 SV=1
ko00620	Pyruvate metabolism	comp60381_c0	mes-miR530a_R+1_1ss20TG	sp|Q8LDW8|GLO2D_ARATH Probable hydroxyacylglutathione hydrolase 2, chloroplast OS=Arabidopsis thaliana GN=GLX2-4 PE=2 SV=1
ko00620	Pyruvate metabolism	comp68419_c0	mes-miR530a_R+1_1ss20TG	sp|P52647|NIFJ_ECOLI Probable pyruvate-flavodoxin oxidoreductase OS=Escherichia coli (strain K12) GN=ydbK PE=3 SV=2
ko00620	Pyruvate metabolism	comp44738_c0	mes-miR530a_R+1_1ss20TG	sp|F4KBF3|AAE17_ARATH Probable acyl-activating enzyme 17, peroxisomal OS=Arabidopsis thaliana GN=AAE17 PE=2 SV=1
ko00620	Pyruvate metabolism	comp68319_c0	aqc-miR169c_R+1_1ss20GA	sp|P77802|YAGX_ECOLI Uncharacterized protein YagX OS=Escherichia coli (strain K12) GN=yagX PE=4 SV=1
ko00620	Pyruvate metabolism	comp36346_c0	gra-MIR482d-p3_2ss13CT17CT	sp|Q8GVE8|CAPP4_ARATH Phosphoenolpyruvate carboxylase 4 OS=Arabidopsis thaliana GN=PPC4 PE=2 SV=1
ko00620	Pyruvate metabolism	comp68457_c0	rco-miR171c	sp|P77802|YAGX_ECOLI Uncharacterized protein YagX OS=Escherichia coli (strain K12) GN=yagX PE=4 SV=1
ko00620	Pyruvate metabolism	comp53493_c0	rco-miR171c	sp|P08997|MASY_ECOLI Malate synthase A OS=Escherichia coli (strain K12) GN=aceB PE=1 SV=1
ko00620	Pyruvate metabolism	comp64222_c0	mdm-miR7122a_2ss4TA21CG	sp|Q8GVE8|CAPP4_ARATH Phosphoenolpyruvate carboxylase 4 OS=Arabidopsis thaliana GN=PPC4 PE=2 SV=1
ko00620	Pyruvate metabolism	comp68387_c0	mdm-miR7122a_2ss4TA21CG	sp|P77748|YDIJ_ECOLI Uncharacterized protein YdiJ OS=Escherichia coli (strain K12) GN=ydiJ PE=4 SV=1
ko00620	Pyruvate metabolism	comp55426_c0	mdm-miR7122a_2ss4TA21CG	sp|Q8W033|AL3I1_ARATH Aldehyde dehydrogenase family 3 member I1, chloroplastic OS=Arabidopsis thaliana GN=ALDH3I1 PE=2 SV=2
ko00620	Pyruvate metabolism	comp68555_c0	gma-miR171m	sp|P77783|YNFF_ECOLI Probable dimethyl sulfoxide reductase chain YnfF OS=Escherichia coli (strain K12) GN=ynfF PE=1 SV=4
ko00620	Pyruvate metabolism	comp68555_c0	gma-miR171m	sp|P77783|YNFF_ECOLI Probable dimethyl sulfoxide reductase chain YnfF OS=Escherichia coli (strain K12) GN=ynfF PE=1 SV=4
ko00620	Pyruvate metabolism	comp67999_c0	gma-miR171m	sp|P77748|YDIJ_ECOLI Uncharacterized protein YdiJ OS=Escherichia coli (strain K12) GN=ydiJ PE=4 SV=1
ko00620	Pyruvate metabolism	comp66678_c0	gma-miR171m	sp|A7ZSD4|AAEB_ECO24 p-hydroxybenzoic acid efflux pump subunit AaeB OS=Escherichia coli O139:H28 (strain E24377A / ETEC) GN=aaeB PE=3 SV=1
ko00620	Pyruvate metabolism	comp68319_c0	ccl-miR167a	sp|P77802|YAGX_ECOLI Uncharacterized protein YagX OS=Escherichia coli (strain K12) GN=yagX PE=4 SV=1
ko00620	Pyruvate metabolism	comp59939_c1	tcc-miR162	sp|Q38970|ACC1_ARATH Acetyl-CoA carboxylase 1 OS=Arabidopsis thaliana GN=ACC1 PE=1 SV=1
ko00620	Pyruvate metabolism	comp64928_c0	tcc-miR162	sp|B9DGD6|ACS_ARATH Acetate--CoA ligase ACS, chloroplastic/glyoxysomal OS=Arabidopsis thaliana GN=ACS PE=1 SV=1
ko00620	Pyruvate metabolism	comp63702_c0	tcc-miR162	sp|Q0V7V2|P2C42_ARATH Probable protein phosphatase 2C 42 OS=Arabidopsis thaliana GN=At3g17090 PE=2 SV=1
ko00620	Pyruvate metabolism	comp68319_c0	ath-miR390a-5p	sp|P77802|YAGX_ECOLI Uncharacterized protein YagX OS=Escherichia coli (strain K12) GN=yagX PE=4 SV=1
ko00620	Pyruvate metabolism	comp68387_c0	ppe-miR1511-3p_L+1R-4	sp|P77748|YDIJ_ECOLI Uncharacterized protein YdiJ OS=Escherichia coli (strain K12) GN=ydiJ PE=4 SV=1
ko00620	Pyruvate metabolism	comp68253_c0	ppe-miR1511-3p_L+1R-4	sp|Q9C550|LEU12_ARATH 2-isopropylmalate synthase 2, chloroplastic OS=Arabidopsis thaliana GN=IPMS2 PE=1 SV=1
ko00620	Pyruvate metabolism	comp65140_c0	ppe-miR1511-3p_L+1R-4	sp|P0AEZ8|MLTD_ECOL6 Membrane-bound lytic murein transglycosylase D OS=Escherichia coli O6:H1 (strain CFT073 / ATCC 700928 / UPEC) GN=mltD PE=3 SV=1
ko00620	Pyruvate metabolism	comp67573_c1	ppe-miR1511-3p_L+1R-4	sp|P34105|MAOX_POPTR NADP-dependent malic enzyme OS=Populus trichocarpa PE=2 SV=3
ko00620	Pyruvate metabolism	comp62750_c0	ppe-miR1511-3p_L+1R-4	sp|Q43117|KPYA_RICCO Pyruvate kinase isozyme A, chloroplastic OS=Ricinus communis PE=1 SV=1
ko00620	Pyruvate metabolism	comp68370_c0	ppe-miR1511-3p_L+1R-4	sp|O64688|ODPB3_ARATH Pyruvate dehydrogenase E1 component subunit beta-3, chloroplastic OS=Arabidopsis thaliana GN=E1-BETA-2 PE=2 SV=1
ko00620	Pyruvate metabolism	comp62562_c0	ppe-miR1511-3p_L+1R-4	sp|B7MNB1|OPGB_ECO45 Phosphoglycerol transferase I OS=Escherichia coli O45:K1 (strain S88 / ExPEC) GN=mdoB PE=3 SV=1
ko00620	Pyruvate metabolism	comp59847_c0	ppe-miR1511-3p_L+1R-4	sp|Q6Z1G7|ODPB1_ORYSJ Pyruvate dehydrogenase E1 component subunit beta-1, mitochondrial OS=Oryza sativa subsp. japonica GN=Os08g0536000 PE=2 SV=1
ko00620	Pyruvate metabolism	comp65561_c0	ppe-miR1511-3p_L+1R-4	sp|O24457|ODPA3_ARATH Pyruvate dehydrogenase E1 component subunit alpha-3, chloroplastic OS=Arabidopsis thaliana GN=PDH-E1 ALPHA PE=1 SV=1
ko00620	Pyruvate metabolism	comp68457_c0	mdm-miR408a_L-1R+1	sp|P77802|YAGX_ECOLI Uncharacterized protein YagX OS=Escherichia coli (strain K12) GN=yagX PE=4 SV=1
ko00620	Pyruvate metabolism	comp66752_c0	mdm-miR408a_L-1R+1	sp|Q8S4Y1|THIC1_ARATH Acetyl-CoA acetyltransferase, cytosolic 1 OS=Arabidopsis thaliana GN=AAT1 PE=2 SV=1
ko00620	Pyruvate metabolism	comp68319_c0	tcc-miR390a	sp|P77802|YAGX_ECOLI Uncharacterized protein YagX OS=Escherichia coli (strain K12) GN=yagX PE=4 SV=1
ko00620	Pyruvate metabolism	comp67573_c1	aly-miR399f-3p	sp|P34105|MAOX_POPTR NADP-dependent malic enzyme OS=Populus trichocarpa PE=2 SV=3
ko00620	Pyruvate metabolism	comp68457_c0	aly-miR399f-3p	sp|P77802|YAGX_ECOLI Uncharacterized protein YagX OS=Escherichia coli (strain K12) GN=yagX PE=4 SV=1
ko00620	Pyruvate metabolism	comp58563_c0	aly-miR399f-3p	sp|P51615|MAOX_VITVI NADP-dependent malic enzyme OS=Vitis vinifera PE=2 SV=1
ko00620	Pyruvate metabolism	comp62562_c0	aly-miR399f-3p	sp|B7MNB1|OPGB_ECO45 Phosphoglycerol transferase I OS=Escherichia coli O45:K1 (strain S88 / ExPEC) GN=mdoB PE=3 SV=1
ko00620	Pyruvate metabolism	comp67999_c0	aly-miR399f-3p	sp|P77748|YDIJ_ECOLI Uncharacterized protein YdiJ OS=Escherichia coli (strain K12) GN=ydiJ PE=4 SV=1
ko00620	Pyruvate metabolism	comp67999_c0	aly-miR399f-3p	sp|P77748|YDIJ_ECOLI Uncharacterized protein YdiJ OS=Escherichia coli (strain K12) GN=ydiJ PE=4 SV=1
ko00620	Pyruvate metabolism	comp68319_c0	aly-miR399f-3p	sp|P77802|YAGX_ECOLI Uncharacterized protein YagX OS=Escherichia coli (strain K12) GN=yagX PE=4 SV=1
ko00620	Pyruvate metabolism	comp68319_c0	hpe-miR162a_L-2	sp|P77802|YAGX_ECOLI Uncharacterized protein YagX OS=Escherichia coli (strain K12) GN=yagX PE=4 SV=1
ko00620	Pyruvate metabolism	comp68319_c0	hpe-miR162a_L-2	sp|P77802|YAGX_ECOLI Uncharacterized protein YagX OS=Escherichia coli (strain K12) GN=yagX PE=4 SV=1
ko00620	Pyruvate metabolism	comp68300_c0	hpe-miR162a_L-2	sp|B1IW07|MUKB_ECOLC Chromosome partition protein MukB OS=Escherichia coli (strain ATCC 8739 / DSM 1576 / Crooks) GN=mukB PE=3 SV=1
ko00620	Pyruvate metabolism	comp68387_c0	hpe-miR162a_L-2	sp|P77748|YDIJ_ECOLI Uncharacterized protein YdiJ OS=Escherichia coli (strain K12) GN=ydiJ PE=4 SV=1
ko00620	Pyruvate metabolism	comp64928_c0	hpe-miR162a_L-2	sp|B9DGD6|ACS_ARATH Acetate--CoA ligase ACS, chloroplastic/glyoxysomal OS=Arabidopsis thaliana GN=ACS PE=1 SV=1
ko00620	Pyruvate metabolism	comp67999_c0	col-miRn-5p-166889_20	sp|P77748|YDIJ_ECOLI Uncharacterized protein YdiJ OS=Escherichia coli (strain K12) GN=ydiJ PE=4 SV=1
ko00620	Pyruvate metabolism	comp60238_c0	ath-MIR5645e-p3_1ss18TA	sp|Q9M5K3|DLDH1_ARATH Dihydrolipoyl dehydrogenase 1, mitochondrial OS=Arabidopsis thaliana GN=LPD1 PE=1 SV=2
ko00620	Pyruvate metabolism	comp68387_c0	ath-MIR5645e-p3_1ss18TA	sp|P77748|YDIJ_ECOLI Uncharacterized protein YdiJ OS=Escherichia coli (strain K12) GN=ydiJ PE=4 SV=1
ko00620	Pyruvate metabolism	comp68300_c0	ath-MIR5645e-p3_1ss18TA	sp|B1IW07|MUKB_ECOLC Chromosome partition protein MukB OS=Escherichia coli (strain ATCC 8739 / DSM 1576 / Crooks) GN=mukB PE=3 SV=1
ko00620	Pyruvate metabolism	comp66678_c0	ath-MIR5645e-p3_1ss18TA	sp|A7ZSD4|AAEB_ECO24 p-hydroxybenzoic acid efflux pump subunit AaeB OS=Escherichia coli O139:H28 (strain E24377A / ETEC) GN=aaeB PE=3 SV=1
ko00620	Pyruvate metabolism	comp66678_c0	ath-MIR5645e-p3_1ss18TA	sp|A7ZSD4|AAEB_ECO24 p-hydroxybenzoic acid efflux pump subunit AaeB OS=Escherichia coli O139:H28 (strain E24377A / ETEC) GN=aaeB PE=3 SV=1
ko00620	Pyruvate metabolism	comp64577_c0	ath-MIR5645e-p3_1ss18TA	sp|P0ABD0|BETT_ECO57 High-affinity choline transport protein OS=Escherichia coli O157:H7 GN=betT PE=3 SV=1
ko00620	Pyruvate metabolism	comp68300_c0	hpe-miR166a_1ss5AC	sp|B1IW07|MUKB_ECOLC Chromosome partition protein MukB OS=Escherichia coli (strain ATCC 8739 / DSM 1576 / Crooks) GN=mukB PE=3 SV=1
ko00620	Pyruvate metabolism	comp67101_c0	peu-MIR2916-p3_2ss18TC19GA	sp|P76129|DOSP_ECOLI Oxygen sensor protein DosP OS=Escherichia coli (strain K12) GN=dosP PE=1 SV=4
ko00620	Pyruvate metabolism	comp64577_c0	dpr-miR167a_R+1	sp|P0ABD0|BETT_ECO57 High-affinity choline transport protein OS=Escherichia coli O157:H7 GN=betT PE=3 SV=1
ko00620	Pyruvate metabolism	comp68319_c0	dpr-miR167a_R+1	sp|P77802|YAGX_ECOLI Uncharacterized protein YagX OS=Escherichia coli (strain K12) GN=yagX PE=4 SV=1
ko00620	Pyruvate metabolism	comp36346_c1	sly-miR168b-3p	sp|Q8GVE8|CAPP4_ARATH Phosphoenolpyruvate carboxylase 4 OS=Arabidopsis thaliana GN=PPC4 PE=2 SV=1
ko00620	Pyruvate metabolism	comp58653_c0	gma-MIR5368-p3_1ss17CT_1	sp|Q9FV66|CAPPB_FLATR Phosphoenolpyruvate carboxylase 1 OS=Flaveria trinervia GN=PPCB PE=1 SV=1
ko00620	Pyruvate metabolism	comp66678_c0	stu-MIR5303j-p5_2ss10GT17CT	sp|A7ZSD4|AAEB_ECO24 p-hydroxybenzoic acid efflux pump subunit AaeB OS=Escherichia coli O139:H28 (strain E24377A / ETEC) GN=aaeB PE=3 SV=1
ko00620	Pyruvate metabolism	comp66678_c0	stu-MIR5303j-p5_2ss10GT17CT	sp|A7ZSD4|AAEB_ECO24 p-hydroxybenzoic acid efflux pump subunit AaeB OS=Escherichia coli O139:H28 (strain E24377A / ETEC) GN=aaeB PE=3 SV=1
ko00620	Pyruvate metabolism	comp66991_c0	stu-MIR5303j-p5_2ss10GT17CT	sp|P57106|MDHC2_ARATH Malate dehydrogenase, cytoplasmic 2 OS=Arabidopsis thaliana GN=At5g43330 PE=2 SV=1
ko00620	Pyruvate metabolism	comp66991_c0	stu-MIR5303j-p5_2ss10GT17CT	sp|P57106|MDHC2_ARATH Malate dehydrogenase, cytoplasmic 2 OS=Arabidopsis thaliana GN=At5g43330 PE=2 SV=1
ko00620	Pyruvate metabolism	comp67268_c0	stu-MIR5303j-p5_2ss10GT17CT	sp|P42632|TDCE_ECOLI PFL-like enzyme TdcE OS=Escherichia coli (strain K12) GN=tdcE PE=1 SV=2
ko00620	Pyruvate metabolism	comp58563_c0	stu-MIR5303j-p5_2ss10GT17CT	sp|P51615|MAOX_VITVI NADP-dependent malic enzyme OS=Vitis vinifera PE=2 SV=1
ko00620	Pyruvate metabolism	comp67886_c0	stu-MIR5303j-p5_2ss10GT17CT	sp|Q9LD43|ACCA_ARATH Acetyl-coenzyme A carboxylase carboxyl transferase subunit alpha, chloroplastic OS=Arabidopsis thaliana GN=CAC3 PE=1 SV=1
ko00620	Pyruvate metabolism	comp62231_c0	stu-MIR5303j-p5_2ss10GT17CT	sp|Q9SYG7|AL7B4_ARATH Aldehyde dehydrogenase family 7 member B4 OS=Arabidopsis thaliana GN=ALDH7B4 PE=2 SV=3
ko00620	Pyruvate metabolism	comp65140_c0	stu-MIR5303j-p5_2ss10GT17CT	sp|P0AEZ8|MLTD_ECOL6 Membrane-bound lytic murein transglycosylase D OS=Escherichia coli O6:H1 (strain CFT073 / ATCC 700928 / UPEC) GN=mltD PE=3 SV=1
ko00620	Pyruvate metabolism	comp63126_c0	stu-MIR5303j-p5_2ss10GT17CT	sp|Q6Z1G7|ODPB1_ORYSJ Pyruvate dehydrogenase E1 component subunit beta-1, mitochondrial OS=Oryza sativa subsp. japonica GN=Os08g0536000 PE=2 SV=1
ko00620	Pyruvate metabolism	comp68108_c0	stu-MIR5303j-p5_2ss10GT17CT	sp|B1IW07|MUKB_ECOLC Chromosome partition protein MukB OS=Escherichia coli (strain ATCC 8739 / DSM 1576 / Crooks) GN=mukB PE=3 SV=1
ko00620	Pyruvate metabolism	comp68387_c0	stu-MIR5303j-p5_2ss10GT17CT	sp|P77748|YDIJ_ECOLI Uncharacterized protein YdiJ OS=Escherichia coli (strain K12) GN=ydiJ PE=4 SV=1
ko00620	Pyruvate metabolism	comp60443_c0	stu-MIR5303j-p5_2ss10GT17CT	sp|P12628|MAOX_PHAVU NADP-dependent malic enzyme OS=Phaseolus vulgaris GN=ME1 PE=1 SV=1
ko00620	Pyruvate metabolism	comp67268_c0	mdm-miR167h_1ss22AT	sp|P42632|TDCE_ECOLI PFL-like enzyme TdcE OS=Escherichia coli (strain K12) GN=tdcE PE=1 SV=2
ko00620	Pyruvate metabolism	comp68419_c0	ctr-miR164_R-1	sp|P52647|NIFJ_ECOLI Probable pyruvate-flavodoxin oxidoreductase OS=Escherichia coli (strain K12) GN=ydbK PE=3 SV=2
ko00620	Pyruvate metabolism	comp68108_c0	ctr-miR164_R-1	sp|B1IW07|MUKB_ECOLC Chromosome partition protein MukB OS=Escherichia coli (strain ATCC 8739 / DSM 1576 / Crooks) GN=mukB PE=3 SV=1
ko00620	Pyruvate metabolism	comp68319_c0	ctr-miR164_R-1	sp|P77802|YAGX_ECOLI Uncharacterized protein YagX OS=Escherichia coli (strain K12) GN=yagX PE=4 SV=1
ko00620	Pyruvate metabolism	comp68457_c0	ctr-miR164_R-1	sp|P77802|YAGX_ECOLI Uncharacterized protein YagX OS=Escherichia coli (strain K12) GN=yagX PE=4 SV=1
ko00620	Pyruvate metabolism	comp68387_c0	ctr-miR164_R-1	sp|P77748|YDIJ_ECOLI Uncharacterized protein YdiJ OS=Escherichia coli (strain K12) GN=ydiJ PE=4 SV=1
ko00620	Pyruvate metabolism	comp62562_c0	ctr-miR164_R-1	sp|B7MNB1|OPGB_ECO45 Phosphoglycerol transferase I OS=Escherichia coli O45:K1 (strain S88 / ExPEC) GN=mdoB PE=3 SV=1
ko00620	Pyruvate metabolism	comp59215_c0	ctr-miR164_R-1	sp|Q42954|KPYC_TOBAC Pyruvate kinase, cytosolic isozyme OS=Nicotiana tabacum PE=2 SV=1
ko00620	Pyruvate metabolism	comp65076_c0	csi-miR166e-5p_L-1R+1_1ss21GA	sp|P29196|CAPP_SOLTU Phosphoenolpyruvate carboxylase OS=Solanum tuberosum GN=PPC1 PE=2 SV=2
ko00620	Pyruvate metabolism	comp68457_c0	csi-miR166e-5p_L-1R+1_1ss21GA	sp|P77802|YAGX_ECOLI Uncharacterized protein YagX OS=Escherichia coli (strain K12) GN=yagX PE=4 SV=1
ko00620	Pyruvate metabolism	comp67268_c0	csi-miR166e-5p_L-1R+1_1ss21GA	sp|P42632|TDCE_ECOLI PFL-like enzyme TdcE OS=Escherichia coli (strain K12) GN=tdcE PE=1 SV=2
ko00620	Pyruvate metabolism	comp68555_c0	bna-miR168a	sp|P77783|YNFF_ECOLI Probable dimethyl sulfoxide reductase chain YnfF OS=Escherichia coli (strain K12) GN=ynfF PE=1 SV=4
ko00620	Pyruvate metabolism	comp68319_c0	bna-miR168a	sp|P77802|YAGX_ECOLI Uncharacterized protein YagX OS=Escherichia coli (strain K12) GN=yagX PE=4 SV=1
ko00620	Pyruvate metabolism	comp62562_c0	bna-miR168a	sp|B7MNB1|OPGB_ECO45 Phosphoglycerol transferase I OS=Escherichia coli O45:K1 (strain S88 / ExPEC) GN=mdoB PE=3 SV=1
ko00620	Pyruvate metabolism	comp68108_c0	bna-miR168a	sp|B1IW07|MUKB_ECOLC Chromosome partition protein MukB OS=Escherichia coli (strain ATCC 8739 / DSM 1576 / Crooks) GN=mukB PE=3 SV=1
ko00620	Pyruvate metabolism	comp68108_c0	bna-miR168a	sp|B1IW07|MUKB_ECOLC Chromosome partition protein MukB OS=Escherichia coli (strain ATCC 8739 / DSM 1576 / Crooks) GN=mukB PE=3 SV=1
ko00620	Pyruvate metabolism	comp68387_c0	bna-miR168a	sp|P77748|YDIJ_ECOLI Uncharacterized protein YdiJ OS=Escherichia coli (strain K12) GN=ydiJ PE=4 SV=1
ko00620	Pyruvate metabolism	comp68419_c0	gma-MIR828a-p3_2ss3AC18CA	sp|P52647|NIFJ_ECOLI Probable pyruvate-flavodoxin oxidoreductase OS=Escherichia coli (strain K12) GN=ydbK PE=3 SV=2
ko00620	Pyruvate metabolism	comp68419_c0	gma-MIR828a-p3_2ss3AC18CA	sp|P52647|NIFJ_ECOLI Probable pyruvate-flavodoxin oxidoreductase OS=Escherichia coli (strain K12) GN=ydbK PE=3 SV=2
ko00620	Pyruvate metabolism	comp68419_c0	gma-MIR828a-p3_2ss3AC18CA	sp|P52647|NIFJ_ECOLI Probable pyruvate-flavodoxin oxidoreductase OS=Escherichia coli (strain K12) GN=ydbK PE=3 SV=2
ko00620	Pyruvate metabolism	comp67268_c0	gma-MIR828a-p3_2ss3AC18CA	sp|P42632|TDCE_ECOLI PFL-like enzyme TdcE OS=Escherichia coli (strain K12) GN=tdcE PE=1 SV=2
ko00620	Pyruvate metabolism	comp67268_c0	gma-MIR828a-p3_2ss3AC18CA	sp|P42632|TDCE_ECOLI PFL-like enzyme TdcE OS=Escherichia coli (strain K12) GN=tdcE PE=1 SV=2
ko00620	Pyruvate metabolism	comp68457_c0	gma-MIR828a-p3_2ss3AC18CA	sp|P77802|YAGX_ECOLI Uncharacterized protein YagX OS=Escherichia coli (strain K12) GN=yagX PE=4 SV=1
ko00620	Pyruvate metabolism	comp68457_c0	gma-MIR828a-p3_2ss3AC18CA	sp|P77802|YAGX_ECOLI Uncharacterized protein YagX OS=Escherichia coli (strain K12) GN=yagX PE=4 SV=1
ko00620	Pyruvate metabolism	comp68387_c0	gma-MIR828a-p3_2ss3AC18CA	sp|P77748|YDIJ_ECOLI Uncharacterized protein YdiJ OS=Escherichia coli (strain K12) GN=ydiJ PE=4 SV=1
ko00620	Pyruvate metabolism	comp50840_c0	gma-MIR828a-p3_2ss3AC18CA	sp|Q38970|ACC1_ARATH Acetyl-CoA carboxylase 1 OS=Arabidopsis thaliana GN=ACC1 PE=1 SV=1
ko00620	Pyruvate metabolism	comp64928_c0	gma-MIR828a-p3_2ss3AC18CA	sp|B9DGD6|ACS_ARATH Acetate--CoA ligase ACS, chloroplastic/glyoxysomal OS=Arabidopsis thaliana GN=ACS PE=1 SV=1
ko00620	Pyruvate metabolism	comp163108_c0	gma-MIR828a-p3_2ss3AC18CA	sp|P29038|LDH_MAIZE L-lactate dehydrogenase OS=Zea mays PE=2 SV=1
ko00620	Pyruvate metabolism	comp68555_c0	gma-MIR828a-p3_2ss3AC18CA	sp|P77783|YNFF_ECOLI Probable dimethyl sulfoxide reductase chain YnfF OS=Escherichia coli (strain K12) GN=ynfF PE=1 SV=4
ko00620	Pyruvate metabolism	comp68555_c0	gma-MIR828a-p3_2ss3AC18CA	sp|P77783|YNFF_ECOLI Probable dimethyl sulfoxide reductase chain YnfF OS=Escherichia coli (strain K12) GN=ynfF PE=1 SV=4
ko00620	Pyruvate metabolism	comp68555_c0	gma-MIR828a-p3_2ss3AC18CA	sp|P77783|YNFF_ECOLI Probable dimethyl sulfoxide reductase chain YnfF OS=Escherichia coli (strain K12) GN=ynfF PE=1 SV=4
ko00620	Pyruvate metabolism	comp36715_c0	gma-MIR828a-p3_2ss3AC18CA	sp|Q8S528|AL2B7_ARATH Aldehyde dehydrogenase family 2 member B7, mitochondrial OS=Arabidopsis thaliana GN=ALDH2B7 PE=2 SV=2
ko00620	Pyruvate metabolism	comp67925_c0	gma-MIR828a-p3_2ss3AC18CA	sp|Q8BMF4|ODP2_MOUSE Dihydrolipoyllysine-residue acetyltransferase component of pyruvate dehydrogenase complex, mitochondrial OS=Mus musculus GN=Dlat PE=1 SV=2
ko00620	Pyruvate metabolism	comp64577_c0	gma-MIR828a-p3_2ss3AC18CA	sp|P0ABD0|BETT_ECO57 High-affinity choline transport protein OS=Escherichia coli O157:H7 GN=betT PE=3 SV=1
ko00620	Pyruvate metabolism	comp64577_c0	gma-MIR828a-p3_2ss3AC18CA	sp|P0ABD0|BETT_ECO57 High-affinity choline transport protein OS=Escherichia coli O157:H7 GN=betT PE=3 SV=1
ko00620	Pyruvate metabolism	comp67999_c0	gma-MIR828a-p3_2ss3AC18CA	sp|P77748|YDIJ_ECOLI Uncharacterized protein YdiJ OS=Escherichia coli (strain K12) GN=ydiJ PE=4 SV=1
ko00620	Pyruvate metabolism	comp66678_c0	gma-MIR828a-p3_2ss3AC18CA	sp|A7ZSD4|AAEB_ECO24 p-hydroxybenzoic acid efflux pump subunit AaeB OS=Escherichia coli O139:H28 (strain E24377A / ETEC) GN=aaeB PE=3 SV=1
ko00620	Pyruvate metabolism	comp66678_c0	gma-MIR828a-p3_2ss3AC18CA	sp|A7ZSD4|AAEB_ECO24 p-hydroxybenzoic acid efflux pump subunit AaeB OS=Escherichia coli O139:H28 (strain E24377A / ETEC) GN=aaeB PE=3 SV=1
ko00620	Pyruvate metabolism	comp58356_c0	gma-MIR828a-p3_2ss3AC18CA	sp|P32670|PTFX2_ECOLI Multiphosphoryl transfer protein 2 OS=Escherichia coli (strain K12) GN=ptsA PE=3 SV=2
ko00620	Pyruvate metabolism	comp61003_c0	gma-MIR828a-p3_2ss3AC18CA	sp|P22988|LDHA_HORVU L-lactate dehydrogenase A OS=Hordeum vulgare PE=1 SV=1
ko00620	Pyruvate metabolism	comp68387_c0	gma-miR394a-5p_R+1_1ss18TA	sp|P77748|YDIJ_ECOLI Uncharacterized protein YdiJ OS=Escherichia coli (strain K12) GN=ydiJ PE=4 SV=1
ko00620	Pyruvate metabolism	comp68419_c0	mtr-MIR2592bj-p3_2ss12TC19AT_2	sp|P52647|NIFJ_ECOLI Probable pyruvate-flavodoxin oxidoreductase OS=Escherichia coli (strain K12) GN=ydbK PE=3 SV=2
ko00620	Pyruvate metabolism	comp68419_c0	hbr-miR398_2ss9CT21GC	sp|P52647|NIFJ_ECOLI Probable pyruvate-flavodoxin oxidoreductase OS=Escherichia coli (strain K12) GN=ydbK PE=3 SV=2
ko00620	Pyruvate metabolism	comp68419_c0	ath-miR858b	sp|P52647|NIFJ_ECOLI Probable pyruvate-flavodoxin oxidoreductase OS=Escherichia coli (strain K12) GN=ydbK PE=3 SV=2
ko00620	Pyruvate metabolism	comp68319_c0	ath-miR858b	sp|P77802|YAGX_ECOLI Uncharacterized protein YagX OS=Escherichia coli (strain K12) GN=yagX PE=4 SV=1
ko00620	Pyruvate metabolism	comp68387_c0	rgl-miR5139_L-1	sp|P77748|YDIJ_ECOLI Uncharacterized protein YdiJ OS=Escherichia coli (strain K12) GN=ydiJ PE=4 SV=1
ko00620	Pyruvate metabolism	comp68253_c0	rgl-miR5139_L-1	sp|Q9C550|LEU12_ARATH 2-isopropylmalate synthase 2, chloroplastic OS=Arabidopsis thaliana GN=IPMS2 PE=1 SV=1
ko00620	Pyruvate metabolism	comp65140_c0	rgl-miR5139_L-1	sp|P0AEZ8|MLTD_ECOL6 Membrane-bound lytic murein transglycosylase D OS=Escherichia coli O6:H1 (strain CFT073 / ATCC 700928 / UPEC) GN=mltD PE=3 SV=1
ko00620	Pyruvate metabolism	comp67573_c1	rgl-miR5139_L-1	sp|P34105|MAOX_POPTR NADP-dependent malic enzyme OS=Populus trichocarpa PE=2 SV=3
ko00620	Pyruvate metabolism	comp62750_c0	rgl-miR5139_L-1	sp|Q43117|KPYA_RICCO Pyruvate kinase isozyme A, chloroplastic OS=Ricinus communis PE=1 SV=1
ko00620	Pyruvate metabolism	comp68370_c0	rgl-miR5139_L-1	sp|O64688|ODPB3_ARATH Pyruvate dehydrogenase E1 component subunit beta-3, chloroplastic OS=Arabidopsis thaliana GN=E1-BETA-2 PE=2 SV=1
ko00620	Pyruvate metabolism	comp62562_c0	rgl-miR5139_L-1	sp|B7MNB1|OPGB_ECO45 Phosphoglycerol transferase I OS=Escherichia coli O45:K1 (strain S88 / ExPEC) GN=mdoB PE=3 SV=1
ko00620	Pyruvate metabolism	comp59847_c0	rgl-miR5139_L-1	sp|Q6Z1G7|ODPB1_ORYSJ Pyruvate dehydrogenase E1 component subunit beta-1, mitochondrial OS=Oryza sativa subsp. japonica GN=Os08g0536000 PE=2 SV=1
ko00620	Pyruvate metabolism	comp65561_c0	rgl-miR5139_L-1	sp|O24457|ODPA3_ARATH Pyruvate dehydrogenase E1 component subunit alpha-3, chloroplastic OS=Arabidopsis thaliana GN=PDH-E1 ALPHA PE=1 SV=1
ko00620	Pyruvate metabolism	comp60238_c0	ath-MIR5645e-p3_2ss18TG20TG_1	sp|Q9M5K3|DLDH1_ARATH Dihydrolipoyl dehydrogenase 1, mitochondrial OS=Arabidopsis thaliana GN=LPD1 PE=1 SV=2
ko00620	Pyruvate metabolism	comp68387_c0	ath-MIR5645e-p3_2ss18TG20TG_1	sp|P77748|YDIJ_ECOLI Uncharacterized protein YdiJ OS=Escherichia coli (strain K12) GN=ydiJ PE=4 SV=1
ko00620	Pyruvate metabolism	comp67101_c0	ath-MIR5645e-p3_2ss18TG20TG_1	sp|P76129|DOSP_ECOLI Oxygen sensor protein DosP OS=Escherichia coli (strain K12) GN=dosP PE=1 SV=4
ko00620	Pyruvate metabolism	comp67268_c0	ath-MIR5645e-p3_2ss18TG20TG_1	sp|P42632|TDCE_ECOLI PFL-like enzyme TdcE OS=Escherichia coli (strain K12) GN=tdcE PE=1 SV=2
ko00620	Pyruvate metabolism	comp68457_c0	gma-miR408a-3p_L-1R+1	sp|P77802|YAGX_ECOLI Uncharacterized protein YagX OS=Escherichia coli (strain K12) GN=yagX PE=4 SV=1
ko00620	Pyruvate metabolism	comp66752_c0	gma-miR408a-3p_L-1R+1	sp|Q8S4Y1|THIC1_ARATH Acetyl-CoA acetyltransferase, cytosolic 1 OS=Arabidopsis thaliana GN=AAT1 PE=2 SV=1
ko00620	Pyruvate metabolism	comp64577_c0	ghr-MIR7499-p3_2ss10GC17CG	sp|P0ABD0|BETT_ECO57 High-affinity choline transport protein OS=Escherichia coli O157:H7 GN=betT PE=3 SV=1
ko00620	Pyruvate metabolism	comp68108_c0	ghr-MIR7499-p3_2ss10GC17CG	sp|B1IW07|MUKB_ECOLC Chromosome partition protein MukB OS=Escherichia coli (strain ATCC 8739 / DSM 1576 / Crooks) GN=mukB PE=3 SV=1
ko00620	Pyruvate metabolism	comp68457_c0	ptc-miR6478_R+2_1ss21GA	sp|P77802|YAGX_ECOLI Uncharacterized protein YagX OS=Escherichia coli (strain K12) GN=yagX PE=4 SV=1
ko00620	Pyruvate metabolism	comp68457_c0	col-miRn-5p-32910_149	sp|P77802|YAGX_ECOLI Uncharacterized protein YagX OS=Escherichia coli (strain K12) GN=yagX PE=4 SV=1
ko00620	Pyruvate metabolism	comp50760_c0	col-miRn-5p-32910_149	sp|P36444|MAOC_FLAPR NADP-dependent malic enzyme, chloroplastic OS=Flaveria pringlei GN=MODA PE=2 SV=1
ko00620	Pyruvate metabolism	comp68387_c0	col-miRn-5p-32910_149	sp|P77748|YDIJ_ECOLI Uncharacterized protein YdiJ OS=Escherichia coli (strain K12) GN=ydiJ PE=4 SV=1
ko00620	Pyruvate metabolism	comp68424_c0	rco-MIR403a-p3_1ss2TG	sp|Q42806|KPYC_SOYBN Pyruvate kinase, cytosolic isozyme OS=Glycine max PE=1 SV=1
ko00620	Pyruvate metabolism	comp42465_c0	rco-MIR403a-p3_1ss2TG	sp|Q0WQF7|OPD21_ARATH Dihydrolipoyllysine-residue acetyltransferase component 1 of pyruvate dehydrogenase complex, mitochondrial OS=Arabidopsis thaliana GN=LTA3 PE=1 SV=2
ko00620	Pyruvate metabolism	comp59611_c0	aly-MIR472-p3_2ss6TG18AG	sp|P27550|ACSA_ECOLI Acetyl-coenzyme A synthetase OS=Escherichia coli (strain K12) GN=acs PE=1 SV=2
ko00620	Pyruvate metabolism	comp68108_c0	bol-miR398a-3p	sp|B1IW07|MUKB_ECOLC Chromosome partition protein MukB OS=Escherichia coli (strain ATCC 8739 / DSM 1576 / Crooks) GN=mukB PE=3 SV=1
ko00620	Pyruvate metabolism	comp67999_c0	bol-miR398a-3p	sp|P77748|YDIJ_ECOLI Uncharacterized protein YdiJ OS=Escherichia coli (strain K12) GN=ydiJ PE=4 SV=1
ko00620	Pyruvate metabolism	comp65140_c0	bol-miR398a-3p	sp|P0AEZ8|MLTD_ECOL6 Membrane-bound lytic murein transglycosylase D OS=Escherichia coli O6:H1 (strain CFT073 / ATCC 700928 / UPEC) GN=mltD PE=3 SV=1
ko00620	Pyruvate metabolism	comp60238_c0	ath-MIR5645b-p3_2ss19TG21TC	sp|Q9M5K3|DLDH1_ARATH Dihydrolipoyl dehydrogenase 1, mitochondrial OS=Arabidopsis thaliana GN=LPD1 PE=1 SV=2
ko00620	Pyruvate metabolism	comp66678_c0	ath-MIR5645b-p3_2ss19TG21TC	sp|A7ZSD4|AAEB_ECO24 p-hydroxybenzoic acid efflux pump subunit AaeB OS=Escherichia coli O139:H28 (strain E24377A / ETEC) GN=aaeB PE=3 SV=1
ko00620	Pyruvate metabolism	comp68387_c0	stu-miR482a-5p_2ss3AG12AC	sp|P77748|YDIJ_ECOLI Uncharacterized protein YdiJ OS=Escherichia coli (strain K12) GN=ydiJ PE=4 SV=1
ko00620	Pyruvate metabolism	comp68419_c0	cpa-miR160c-3p	sp|P52647|NIFJ_ECOLI Probable pyruvate-flavodoxin oxidoreductase OS=Escherichia coli (strain K12) GN=ydbK PE=3 SV=2
ko00620	Pyruvate metabolism	comp64933_c0	cpa-miR160c-3p	sp|O24496|GLO2C_ARATH Hydroxyacylglutathione hydrolase cytoplasmic OS=Arabidopsis thaliana GN=GLX2-2 PE=1 SV=2
ko00620	Pyruvate metabolism	comp68319_c0	vun-miR169	sp|P77802|YAGX_ECOLI Uncharacterized protein YagX OS=Escherichia coli (strain K12) GN=yagX PE=4 SV=1
ko00620	Pyruvate metabolism	comp68457_c0	csi-miR166e-5p	sp|P77802|YAGX_ECOLI Uncharacterized protein YagX OS=Escherichia coli (strain K12) GN=yagX PE=4 SV=1
ko00620	Pyruvate metabolism	comp68419_c0	csi-miR166e-5p	sp|P52647|NIFJ_ECOLI Probable pyruvate-flavodoxin oxidoreductase OS=Escherichia coli (strain K12) GN=ydbK PE=3 SV=2
ko00620	Pyruvate metabolism	comp68108_c0	csi-miR166e-5p	sp|B1IW07|MUKB_ECOLC Chromosome partition protein MukB OS=Escherichia coli (strain ATCC 8739 / DSM 1576 / Crooks) GN=mukB PE=3 SV=1
ko00620	Pyruvate metabolism	comp68424_c0	rco-MIR403a-p5_1ss2TG	sp|Q42806|KPYC_SOYBN Pyruvate kinase, cytosolic isozyme OS=Glycine max PE=1 SV=1
ko00620	Pyruvate metabolism	comp42465_c0	rco-MIR403a-p5_1ss2TG	sp|Q0WQF7|OPD21_ARATH Dihydrolipoyllysine-residue acetyltransferase component 1 of pyruvate dehydrogenase complex, mitochondrial OS=Arabidopsis thaliana GN=LTA3 PE=1 SV=2
ko00620	Pyruvate metabolism	comp68319_c0	aly-miR171c-5p_2ss1AG21CA	sp|P77802|YAGX_ECOLI Uncharacterized protein YagX OS=Escherichia coli (strain K12) GN=yagX PE=4 SV=1
ko00620	Pyruvate metabolism	comp64933_c0	aly-miR171c-5p_2ss1AG21CA	sp|O24496|GLO2C_ARATH Hydroxyacylglutathione hydrolase cytoplasmic OS=Arabidopsis thaliana GN=GLX2-2 PE=1 SV=2
ko00620	Pyruvate metabolism	comp68108_c0	aly-miR166g-5p_2ss10TG20GT	sp|B1IW07|MUKB_ECOLC Chromosome partition protein MukB OS=Escherichia coli (strain ATCC 8739 / DSM 1576 / Crooks) GN=mukB PE=3 SV=1
ko00620	Pyruvate metabolism	comp68108_c0	aly-miR166g-5p_2ss10TG20GT	sp|B1IW07|MUKB_ECOLC Chromosome partition protein MukB OS=Escherichia coli (strain ATCC 8739 / DSM 1576 / Crooks) GN=mukB PE=3 SV=1
ko00620	Pyruvate metabolism	comp68108_c0	aly-miR166g-5p_2ss10TG20GT	sp|B1IW07|MUKB_ECOLC Chromosome partition protein MukB OS=Escherichia coli (strain ATCC 8739 / DSM 1576 / Crooks) GN=mukB PE=3 SV=1
ko00620	Pyruvate metabolism	comp68457_c0	aly-miR166g-5p_2ss10TG20GT	sp|P77802|YAGX_ECOLI Uncharacterized protein YagX OS=Escherichia coli (strain K12) GN=yagX PE=4 SV=1
ko00620	Pyruvate metabolism	comp67999_c0	aly-miR166g-5p_2ss10TG20GT	sp|P77748|YDIJ_ECOLI Uncharacterized protein YdiJ OS=Escherichia coli (strain K12) GN=ydiJ PE=4 SV=1
ko00620	Pyruvate metabolism	comp68419_c0	htu-miR160a_R+1	sp|P52647|NIFJ_ECOLI Probable pyruvate-flavodoxin oxidoreductase OS=Escherichia coli (strain K12) GN=ydbK PE=3 SV=2
ko00620	Pyruvate metabolism	comp68108_c0	htu-miR160a_R+1	sp|B1IW07|MUKB_ECOLC Chromosome partition protein MukB OS=Escherichia coli (strain ATCC 8739 / DSM 1576 / Crooks) GN=mukB PE=3 SV=1
ko00620	Pyruvate metabolism	comp68457_c0	dpr-miR408_L-1	sp|P77802|YAGX_ECOLI Uncharacterized protein YagX OS=Escherichia coli (strain K12) GN=yagX PE=4 SV=1
ko00620	Pyruvate metabolism	comp66752_c0	dpr-miR408_L-1	sp|Q8S4Y1|THIC1_ARATH Acetyl-CoA acetyltransferase, cytosolic 1 OS=Arabidopsis thaliana GN=AAT1 PE=2 SV=1
ko00620	Pyruvate metabolism	comp68253_c0	dpr-miR408_L-1	sp|Q9C550|LEU12_ARATH 2-isopropylmalate synthase 2, chloroplastic OS=Arabidopsis thaliana GN=IPMS2 PE=1 SV=1
ko00620	Pyruvate metabolism	comp68108_c0	dpr-miR408_L-1	sp|B1IW07|MUKB_ECOLC Chromosome partition protein MukB OS=Escherichia coli (strain ATCC 8739 / DSM 1576 / Crooks) GN=mukB PE=3 SV=1
ko00620	Pyruvate metabolism	comp68253_c0	mtr-MIR2586a-p3_2ss4TG21CT	sp|Q9C550|LEU12_ARATH 2-isopropylmalate synthase 2, chloroplastic OS=Arabidopsis thaliana GN=IPMS2 PE=1 SV=1
ko00620	Pyruvate metabolism	comp68387_c0	ptc-miR172b-5p	sp|P77748|YDIJ_ECOLI Uncharacterized protein YdiJ OS=Escherichia coli (strain K12) GN=ydiJ PE=4 SV=1
ko00620	Pyruvate metabolism	comp67021_c0	ptc-miR172b-5p	sp|Q43117|KPYA_RICCO Pyruvate kinase isozyme A, chloroplastic OS=Ricinus communis PE=1 SV=1
ko00620	Pyruvate metabolism	comp68419_c0	ptc-miR172b-5p	sp|P52647|NIFJ_ECOLI Probable pyruvate-flavodoxin oxidoreductase OS=Escherichia coli (strain K12) GN=ydbK PE=3 SV=2
ko00620	Pyruvate metabolism	comp63126_c0	ssl-miR397_1ss2CA	sp|Q6Z1G7|ODPB1_ORYSJ Pyruvate dehydrogenase E1 component subunit beta-1, mitochondrial OS=Oryza sativa subsp. japonica GN=Os08g0536000 PE=2 SV=1
ko00620	Pyruvate metabolism	comp58356_c0	ssl-miR828	sp|P32670|PTFX2_ECOLI Multiphosphoryl transfer protein 2 OS=Escherichia coli (strain K12) GN=ptsA PE=3 SV=2
ko00620	Pyruvate metabolism	comp1232012_c0	ssl-miR828	sp|P29193|CAPP1_SACHY Phosphoenolpyruvate carboxylase, housekeeping isozyme OS=Saccharum hybrid PE=3 SV=1
ko00620	Pyruvate metabolism	comp65076_c0	ssl-miR828	sp|P29196|CAPP_SOLTU Phosphoenolpyruvate carboxylase OS=Solanum tuberosum GN=PPC1 PE=2 SV=2
ko00620	Pyruvate metabolism	comp68300_c0	aqc-miR172b_1ss21TG	sp|B1IW07|MUKB_ECOLC Chromosome partition protein MukB OS=Escherichia coli (strain ATCC 8739 / DSM 1576 / Crooks) GN=mukB PE=3 SV=1
ko00620	Pyruvate metabolism	comp68300_c0	aqc-miR172b_1ss21TG	sp|B1IW07|MUKB_ECOLC Chromosome partition protein MukB OS=Escherichia coli (strain ATCC 8739 / DSM 1576 / Crooks) GN=mukB PE=3 SV=1
ko00620	Pyruvate metabolism	comp33183_c0	aqc-miR172b_1ss21TG	sp|O24457|ODPA3_ARATH Pyruvate dehydrogenase E1 component subunit alpha-3, chloroplastic OS=Arabidopsis thaliana GN=PDH-E1 ALPHA PE=1 SV=1
ko00620	Pyruvate metabolism	comp59072_c0	aqc-miR172b_1ss21TG	sp|P42630|TDCG_ECOLI L-serine dehydratase TdcG OS=Escherichia coli (strain K12) GN=tdcG PE=1 SV=4
ko00620	Pyruvate metabolism	comp67268_c0	ama-miR396-5p_1ss21TG	sp|P42632|TDCE_ECOLI PFL-like enzyme TdcE OS=Escherichia coli (strain K12) GN=tdcE PE=1 SV=2
ko00620	Pyruvate metabolism	comp66899_c1	ama-miR396-5p_1ss21TG	sp|Q9SU63|AL2B4_ARATH Aldehyde dehydrogenase family 2 member B4, mitochondrial OS=Arabidopsis thaliana GN=ALDH2B4 PE=2 SV=1
ko00620	Pyruvate metabolism	comp68387_c0	ama-miR396-5p_1ss21TG	sp|P77748|YDIJ_ECOLI Uncharacterized protein YdiJ OS=Escherichia coli (strain K12) GN=ydiJ PE=4 SV=1
ko00620	Pyruvate metabolism	comp66678_c0	ama-miR396-5p_1ss21TG	sp|A7ZSD4|AAEB_ECO24 p-hydroxybenzoic acid efflux pump subunit AaeB OS=Escherichia coli O139:H28 (strain E24377A / ETEC) GN=aaeB PE=3 SV=1
ko00620	Pyruvate metabolism	comp65872_c0	ama-miR396-5p_1ss21TG	sp|P17783|MDHM_CITLA Malate dehydrogenase, mitochondrial OS=Citrullus lanatus GN=MMDH PE=1 SV=1
ko00620	Pyruvate metabolism	comp67999_c0	ama-miR396-5p_1ss21TG	sp|P77748|YDIJ_ECOLI Uncharacterized protein YdiJ OS=Escherichia coli (strain K12) GN=ydiJ PE=4 SV=1
ko00620	Pyruvate metabolism	comp67268_c0	lja-miR167_R+1_1ss21GT	sp|P42632|TDCE_ECOLI PFL-like enzyme TdcE OS=Escherichia coli (strain K12) GN=tdcE PE=1 SV=2
ko00620	Pyruvate metabolism	comp68319_c0	lja-miR390a-3p_1ss8CT	sp|P77802|YAGX_ECOLI Uncharacterized protein YagX OS=Escherichia coli (strain K12) GN=yagX PE=4 SV=1
ko00620	Pyruvate metabolism	comp68319_c0	lja-miR390a-3p_1ss8CT	sp|P77802|YAGX_ECOLI Uncharacterized protein YagX OS=Escherichia coli (strain K12) GN=yagX PE=4 SV=1
ko00620	Pyruvate metabolism	comp68300_c0	lus-MIR156a-p3_1ss21CT	sp|B1IW07|MUKB_ECOLC Chromosome partition protein MukB OS=Escherichia coli (strain ATCC 8739 / DSM 1576 / Crooks) GN=mukB PE=3 SV=1
ko00620	Pyruvate metabolism	comp68457_c0	lus-MIR156a-p3_1ss21CT	sp|P77802|YAGX_ECOLI Uncharacterized protein YagX OS=Escherichia coli (strain K12) GN=yagX PE=4 SV=1
ko00620	Pyruvate metabolism	comp46758_c0	lus-MIR156a-p3_1ss21CT	-
ko00620	Pyruvate metabolism	comp67268_c0	rco-miR156e_L+1R-1	sp|P42632|TDCE_ECOLI PFL-like enzyme TdcE OS=Escherichia coli (strain K12) GN=tdcE PE=1 SV=2
ko00620	Pyruvate metabolism	comp68457_c0	gra-miR167a_L-2R+2	sp|P77802|YAGX_ECOLI Uncharacterized protein YagX OS=Escherichia coli (strain K12) GN=yagX PE=4 SV=1
ko00620	Pyruvate metabolism	comp68457_c0	gra-miR167a_L-2R+2	sp|P77802|YAGX_ECOLI Uncharacterized protein YagX OS=Escherichia coli (strain K12) GN=yagX PE=4 SV=1
ko00620	Pyruvate metabolism	comp68457_c0	gra-miR167a_L-2R+2	sp|P77802|YAGX_ECOLI Uncharacterized protein YagX OS=Escherichia coli (strain K12) GN=yagX PE=4 SV=1
ko00620	Pyruvate metabolism	comp68387_c0	nta-MIR6149a-p5_2ss18CT21TA	sp|P77748|YDIJ_ECOLI Uncharacterized protein YdiJ OS=Escherichia coli (strain K12) GN=ydiJ PE=4 SV=1
ko00620	Pyruvate metabolism	comp67268_c0	amg-miR396	sp|P42632|TDCE_ECOLI PFL-like enzyme TdcE OS=Escherichia coli (strain K12) GN=tdcE PE=1 SV=2
ko00620	Pyruvate metabolism	comp66899_c1	amg-miR396	sp|Q9SU63|AL2B4_ARATH Aldehyde dehydrogenase family 2 member B4, mitochondrial OS=Arabidopsis thaliana GN=ALDH2B4 PE=2 SV=1
ko00620	Pyruvate metabolism	comp68387_c0	amg-miR396	sp|P77748|YDIJ_ECOLI Uncharacterized protein YdiJ OS=Escherichia coli (strain K12) GN=ydiJ PE=4 SV=1
ko00620	Pyruvate metabolism	comp66678_c0	amg-miR396	sp|A7ZSD4|AAEB_ECO24 p-hydroxybenzoic acid efflux pump subunit AaeB OS=Escherichia coli O139:H28 (strain E24377A / ETEC) GN=aaeB PE=3 SV=1
ko00620	Pyruvate metabolism	comp65872_c0	amg-miR396	sp|P17783|MDHM_CITLA Malate dehydrogenase, mitochondrial OS=Citrullus lanatus GN=MMDH PE=1 SV=1
ko00620	Pyruvate metabolism	comp67999_c0	amg-miR396	sp|P77748|YDIJ_ECOLI Uncharacterized protein YdiJ OS=Escherichia coli (strain K12) GN=ydiJ PE=4 SV=1
ko00620	Pyruvate metabolism	comp68419_c0	aly-miR171c-5p_1ss5AG	sp|P52647|NIFJ_ECOLI Probable pyruvate-flavodoxin oxidoreductase OS=Escherichia coli (strain K12) GN=ydbK PE=3 SV=2
ko00620	Pyruvate metabolism	comp67999_c0	aly-miR171c-5p_1ss5AG	sp|P77748|YDIJ_ECOLI Uncharacterized protein YdiJ OS=Escherichia coli (strain K12) GN=ydiJ PE=4 SV=1
ko00620	Pyruvate metabolism	comp67573_c1	cpa-miR164d	sp|P34105|MAOX_POPTR NADP-dependent malic enzyme OS=Populus trichocarpa PE=2 SV=3
ko00620	Pyruvate metabolism	comp68555_c0	cpa-miR164d	sp|P77783|YNFF_ECOLI Probable dimethyl sulfoxide reductase chain YnfF OS=Escherichia coli (strain K12) GN=ynfF PE=1 SV=4
ko00620	Pyruvate metabolism	comp68555_c0	cpa-miR164d	sp|P77783|YNFF_ECOLI Probable dimethyl sulfoxide reductase chain YnfF OS=Escherichia coli (strain K12) GN=ynfF PE=1 SV=4
ko00620	Pyruvate metabolism	comp68477_c0	cpa-miR164d	sp|P37221|MAOM_SOLTU NAD-dependent malic enzyme 62 kDa isoform, mitochondrial OS=Solanum tuberosum PE=1 SV=1
ko00620	Pyruvate metabolism	comp46758_c0	cpa-miR164d	-
ko00620	Pyruvate metabolism	comp60238_c0	cpa-miR164d	sp|Q9M5K3|DLDH1_ARATH Dihydrolipoyl dehydrogenase 1, mitochondrial OS=Arabidopsis thaliana GN=LPD1 PE=1 SV=2
ko00620	Pyruvate metabolism	comp64577_c0	dpr-miR167a_L-2R+3	sp|P0ABD0|BETT_ECO57 High-affinity choline transport protein OS=Escherichia coli O157:H7 GN=betT PE=3 SV=1
ko00620	Pyruvate metabolism	comp67021_c0	hpe-miR166a	sp|Q43117|KPYA_RICCO Pyruvate kinase isozyme A, chloroplastic OS=Ricinus communis PE=1 SV=1
ko00620	Pyruvate metabolism	comp68253_c0	lja-miR171c	sp|Q9C550|LEU12_ARATH 2-isopropylmalate synthase 2, chloroplastic OS=Arabidopsis thaliana GN=IPMS2 PE=1 SV=1
ko00620	Pyruvate metabolism	comp68555_c0	lja-miR171c	sp|P77783|YNFF_ECOLI Probable dimethyl sulfoxide reductase chain YnfF OS=Escherichia coli (strain K12) GN=ynfF PE=1 SV=4
ko00620	Pyruvate metabolism	comp68419_c0	lja-miR171c	sp|P52647|NIFJ_ECOLI Probable pyruvate-flavodoxin oxidoreductase OS=Escherichia coli (strain K12) GN=ydbK PE=3 SV=2
ko00620	Pyruvate metabolism	comp67999_c0	lja-miR171c	sp|P77748|YDIJ_ECOLI Uncharacterized protein YdiJ OS=Escherichia coli (strain K12) GN=ydiJ PE=4 SV=1
ko00620	Pyruvate metabolism	comp65875_c0	lja-miR171c	sp|Q9FLW9|PKP2_ARATH Plastidial pyruvate kinase 2 OS=Arabidopsis thaliana GN=PKP2 PE=1 SV=1
ko00620	Pyruvate metabolism	comp67101_c0	gma-miR319a	sp|P76129|DOSP_ECOLI Oxygen sensor protein DosP OS=Escherichia coli (strain K12) GN=dosP PE=1 SV=4
ko00620	Pyruvate metabolism	comp68419_c0	gma-miR319a	sp|P52647|NIFJ_ECOLI Probable pyruvate-flavodoxin oxidoreductase OS=Escherichia coli (strain K12) GN=ydbK PE=3 SV=2
ko00620	Pyruvate metabolism	comp53493_c0	ssl-miR171b_2ss11CT19AT	sp|P08997|MASY_ECOLI Malate synthase A OS=Escherichia coli (strain K12) GN=aceB PE=1 SV=1
ko00620	Pyruvate metabolism	comp67101_c0	ssl-miR171b_2ss11CT19AT	sp|P76129|DOSP_ECOLI Oxygen sensor protein DosP OS=Escherichia coli (strain K12) GN=dosP PE=1 SV=4
ko00620	Pyruvate metabolism	comp68319_c0	col-miRn-5p-46619_106	sp|P77802|YAGX_ECOLI Uncharacterized protein YagX OS=Escherichia coli (strain K12) GN=yagX PE=4 SV=1
ko00620	Pyruvate metabolism	comp59072_c0	stu-miR156f-3p_L+2R-1_4ss14TC15T-22AG23TC	sp|P42630|TDCG_ECOLI L-serine dehydratase TdcG OS=Escherichia coli (strain K12) GN=tdcG PE=1 SV=4
ko00620	Pyruvate metabolism	comp68424_c0	mes-MIR477g-p5_1ss1CT	sp|Q42806|KPYC_SOYBN Pyruvate kinase, cytosolic isozyme OS=Glycine max PE=1 SV=1
ko00620	Pyruvate metabolism	comp42465_c0	ama-miR396-3p_L-2R+2	sp|Q0WQF7|OPD21_ARATH Dihydrolipoyllysine-residue acetyltransferase component 1 of pyruvate dehydrogenase complex, mitochondrial OS=Arabidopsis thaliana GN=LTA3 PE=1 SV=2
ko00620	Pyruvate metabolism	comp68419_c0	ahy-miR167-3p_2ss8GA15TC	sp|P52647|NIFJ_ECOLI Probable pyruvate-flavodoxin oxidoreductase OS=Escherichia coli (strain K12) GN=ydbK PE=3 SV=2
ko00620	Pyruvate metabolism	comp63693_c0	nta-miR172d	sp|P46487|MDHM_EUCGU Malate dehydrogenase, mitochondrial OS=Eucalyptus gunnii GN=MDH PE=2 SV=1
ko00620	Pyruvate metabolism	comp63301_c0	nta-miR172d	-
ko00620	Pyruvate metabolism	comp68319_c0	nta-miR172d	sp|P77802|YAGX_ECOLI Uncharacterized protein YagX OS=Escherichia coli (strain K12) GN=yagX PE=4 SV=1
ko00620	Pyruvate metabolism	comp59072_c0	nta-miR172d	sp|P42630|TDCG_ECOLI L-serine dehydratase TdcG OS=Escherichia coli (strain K12) GN=tdcG PE=1 SV=4
ko00620	Pyruvate metabolism	comp67999_c0	ppe-miR172a-5p_1ss21GA	sp|P77748|YDIJ_ECOLI Uncharacterized protein YdiJ OS=Escherichia coli (strain K12) GN=ydiJ PE=4 SV=1
ko00620	Pyruvate metabolism	comp68555_c0	ppe-miR172a-5p_1ss21GA	sp|P77783|YNFF_ECOLI Probable dimethyl sulfoxide reductase chain YnfF OS=Escherichia coli (strain K12) GN=ynfF PE=1 SV=4
ko00620	Pyruvate metabolism	comp68555_c0	ppe-miR172a-5p_1ss21GA	sp|P77783|YNFF_ECOLI Probable dimethyl sulfoxide reductase chain YnfF OS=Escherichia coli (strain K12) GN=ynfF PE=1 SV=4
ko00620	Pyruvate metabolism	comp32791_c0	ppe-miR172a-5p_1ss21GA	sp|Q8S4Y1|THIC1_ARATH Acetyl-CoA acetyltransferase, cytosolic 1 OS=Arabidopsis thaliana GN=AAT1 PE=2 SV=1
ko00620	Pyruvate metabolism	comp21708_c0	ppe-miR172a-5p_1ss21GA	sp|Q9FV65|CAPPC_FLATR Phosphoenolpyruvate carboxylase 2 OS=Flaveria trinervia GN=PPCC PE=1 SV=1
ko00620	Pyruvate metabolism	comp65076_c0	ppe-miR172a-5p_1ss21GA	sp|P29196|CAPP_SOLTU Phosphoenolpyruvate carboxylase OS=Solanum tuberosum GN=PPC1 PE=2 SV=2
ko00620	Pyruvate metabolism	comp67886_c0	ama-miR396-5p	sp|Q9LD43|ACCA_ARATH Acetyl-coenzyme A carboxylase carboxyl transferase subunit alpha, chloroplastic OS=Arabidopsis thaliana GN=CAC3 PE=1 SV=1
ko00620	Pyruvate metabolism	comp67886_c0	ama-miR396-5p	sp|Q9LD43|ACCA_ARATH Acetyl-coenzyme A carboxylase carboxyl transferase subunit alpha, chloroplastic OS=Arabidopsis thaliana GN=CAC3 PE=1 SV=1
ko00620	Pyruvate metabolism	comp10358_c0	ama-miR396-5p	sp|O24457|ODPA3_ARATH Pyruvate dehydrogenase E1 component subunit alpha-3, chloroplastic OS=Arabidopsis thaliana GN=PDH-E1 ALPHA PE=1 SV=1
ko00620	Pyruvate metabolism	comp67999_c0	cpa-miR164a	sp|P77748|YDIJ_ECOLI Uncharacterized protein YdiJ OS=Escherichia coli (strain K12) GN=ydiJ PE=4 SV=1
ko00620	Pyruvate metabolism	comp68419_c0	cpa-miR164a	sp|P52647|NIFJ_ECOLI Probable pyruvate-flavodoxin oxidoreductase OS=Escherichia coli (strain K12) GN=ydbK PE=3 SV=2
ko00620	Pyruvate metabolism	comp68108_c0	cpa-miR164a	sp|B1IW07|MUKB_ECOLC Chromosome partition protein MukB OS=Escherichia coli (strain ATCC 8739 / DSM 1576 / Crooks) GN=mukB PE=3 SV=1
ko00620	Pyruvate metabolism	comp62562_c0	cpa-miR164a	sp|B7MNB1|OPGB_ECO45 Phosphoglycerol transferase I OS=Escherichia coli O45:K1 (strain S88 / ExPEC) GN=mdoB PE=3 SV=1
ko00620	Pyruvate metabolism	comp58356_c0	col-miRn-5p-17637_256	sp|P32670|PTFX2_ECOLI Multiphosphoryl transfer protein 2 OS=Escherichia coli (strain K12) GN=ptsA PE=3 SV=2
ko00620	Pyruvate metabolism	comp62515_c0	col-miRn-5p-17637_256	sp|Q70E96|AL3F1_ARATH Aldehyde dehydrogenase family 3 member F1 OS=Arabidopsis thaliana GN=ALDH3F1 PE=2 SV=2
ko00620	Pyruvate metabolism	comp68457_c0	aly-miR171b-3p_1ss19AG	sp|P77802|YAGX_ECOLI Uncharacterized protein YagX OS=Escherichia coli (strain K12) GN=yagX PE=4 SV=1
ko00620	Pyruvate metabolism	comp68108_c0	aly-miR171b-3p_1ss19AG	sp|B1IW07|MUKB_ECOLC Chromosome partition protein MukB OS=Escherichia coli (strain ATCC 8739 / DSM 1576 / Crooks) GN=mukB PE=3 SV=1
ko00620	Pyruvate metabolism	comp68419_c0	aly-miR171b-3p_1ss19AG	sp|P52647|NIFJ_ECOLI Probable pyruvate-flavodoxin oxidoreductase OS=Escherichia coli (strain K12) GN=ydbK PE=3 SV=2
ko00620	Pyruvate metabolism	comp64577_c0	aqc-MIR172b-p3_1ss9TC	sp|P0ABD0|BETT_ECO57 High-affinity choline transport protein OS=Escherichia coli O157:H7 GN=betT PE=3 SV=1
ko00620	Pyruvate metabolism	comp68419_c0	lja-miR171d-3p	sp|P52647|NIFJ_ECOLI Probable pyruvate-flavodoxin oxidoreductase OS=Escherichia coli (strain K12) GN=ydbK PE=3 SV=2
ko00620	Pyruvate metabolism	comp68419_c0	lja-miR171d-3p	sp|P52647|NIFJ_ECOLI Probable pyruvate-flavodoxin oxidoreductase OS=Escherichia coli (strain K12) GN=ydbK PE=3 SV=2
ko00620	Pyruvate metabolism	comp67999_c0	lja-miR171d-3p	sp|P77748|YDIJ_ECOLI Uncharacterized protein YdiJ OS=Escherichia coli (strain K12) GN=ydiJ PE=4 SV=1
ko00620	Pyruvate metabolism	comp66899_c1	lja-miR171d-3p	sp|Q9SU63|AL2B4_ARATH Aldehyde dehydrogenase family 2 member B4, mitochondrial OS=Arabidopsis thaliana GN=ALDH2B4 PE=2 SV=1
ko00620	Pyruvate metabolism	comp68319_c0	cca-miR396a-3p_2ss7GT21AG	sp|P77802|YAGX_ECOLI Uncharacterized protein YagX OS=Escherichia coli (strain K12) GN=yagX PE=4 SV=1
ko00620	Pyruvate metabolism	comp67999_c0	hbr-MIR159b-p3_1ss20GA	sp|P77748|YDIJ_ECOLI Uncharacterized protein YdiJ OS=Escherichia coli (strain K12) GN=ydiJ PE=4 SV=1
ko00620	Pyruvate metabolism	comp49242_c0	mtr-MIR2592bj-p3_2ss12TC19AT_1	sp|Q8S528|AL2B7_ARATH Aldehyde dehydrogenase family 2 member B7, mitochondrial OS=Arabidopsis thaliana GN=ALDH2B7 PE=2 SV=2
ko00620	Pyruvate metabolism	comp68108_c0	mtr-MIR2592bj-p3_2ss12TC19AT_1	sp|B1IW07|MUKB_ECOLC Chromosome partition protein MukB OS=Escherichia coli (strain ATCC 8739 / DSM 1576 / Crooks) GN=mukB PE=3 SV=1
ko00620	Pyruvate metabolism	comp68108_c0	mtr-MIR2592bj-p3_2ss12TC19AT_1	sp|B1IW07|MUKB_ECOLC Chromosome partition protein MukB OS=Escherichia coli (strain ATCC 8739 / DSM 1576 / Crooks) GN=mukB PE=3 SV=1
ko00620	Pyruvate metabolism	comp67101_c0	mtr-MIR2592bj-p3_2ss12TC19AT_1	sp|P76129|DOSP_ECOLI Oxygen sensor protein DosP OS=Escherichia coli (strain K12) GN=dosP PE=1 SV=4
ko00620	Pyruvate metabolism	comp68419_c0	mtr-MIR2592bj-p3_2ss12TC19AT_1	sp|P52647|NIFJ_ECOLI Probable pyruvate-flavodoxin oxidoreductase OS=Escherichia coli (strain K12) GN=ydbK PE=3 SV=2
ko00620	Pyruvate metabolism	comp68555_c0	mtr-MIR2592bj-p3_2ss12TC19AT_1	sp|P77783|YNFF_ECOLI Probable dimethyl sulfoxide reductase chain YnfF OS=Escherichia coli (strain K12) GN=ynfF PE=1 SV=4
ko00620	Pyruvate metabolism	comp63693_c0	ath-miR172a	sp|P46487|MDHM_EUCGU Malate dehydrogenase, mitochondrial OS=Eucalyptus gunnii GN=MDH PE=2 SV=1
ko00620	Pyruvate metabolism	comp63301_c0	ath-miR172a	-
ko00620	Pyruvate metabolism	comp68319_c0	ath-miR172a	sp|P77802|YAGX_ECOLI Uncharacterized protein YagX OS=Escherichia coli (strain K12) GN=yagX PE=4 SV=1
ko00620	Pyruvate metabolism	comp59072_c0	ath-miR172a	sp|P42630|TDCG_ECOLI L-serine dehydratase TdcG OS=Escherichia coli (strain K12) GN=tdcG PE=1 SV=4
ko00620	Pyruvate metabolism	comp44358_c0	ppe-miR535b	sp|P29038|LDH_MAIZE L-lactate dehydrogenase OS=Zea mays PE=2 SV=1
ko00620	Pyruvate metabolism	comp64806_c0	vun-MIR482-p5_2ss17CT18TC	sp|P19446|MDHG_CITLA Malate dehydrogenase, glyoxysomal OS=Citrullus lanatus PE=1 SV=1
ko00620	Pyruvate metabolism	comp60238_c0	ath-MIR5645b-p5_2ss19TG21TC	sp|Q9M5K3|DLDH1_ARATH Dihydrolipoyl dehydrogenase 1, mitochondrial OS=Arabidopsis thaliana GN=LPD1 PE=1 SV=2
ko00620	Pyruvate metabolism	comp66678_c0	ath-MIR5645b-p5_2ss19TG21TC	sp|A7ZSD4|AAEB_ECO24 p-hydroxybenzoic acid efflux pump subunit AaeB OS=Escherichia coli O139:H28 (strain E24377A / ETEC) GN=aaeB PE=3 SV=1
ko00620	Pyruvate metabolism	comp62562_c0	ptc-miR1448_L+1R+1	sp|B7MNB1|OPGB_ECO45 Phosphoglycerol transferase I OS=Escherichia coli O45:K1 (strain S88 / ExPEC) GN=mdoB PE=3 SV=1
ko00620	Pyruvate metabolism	comp65872_c0	ptc-miR1448_L+1R+1	sp|P17783|MDHM_CITLA Malate dehydrogenase, mitochondrial OS=Citrullus lanatus GN=MMDH PE=1 SV=1
ko00620	Pyruvate metabolism	comp68319_c0	rco-miR167a_R+1	sp|P77802|YAGX_ECOLI Uncharacterized protein YagX OS=Escherichia coli (strain K12) GN=yagX PE=4 SV=1
ko00620	Pyruvate metabolism	comp67101_c0	ath-MIR5645e-p3_2ss18TG20TG_2	sp|P76129|DOSP_ECOLI Oxygen sensor protein DosP OS=Escherichia coli (strain K12) GN=dosP PE=1 SV=4
ko00620	Pyruvate metabolism	comp68387_c0	col-miRn-5p-1103_1978	sp|P77748|YDIJ_ECOLI Uncharacterized protein YdiJ OS=Escherichia coli (strain K12) GN=ydiJ PE=4 SV=1
ko00620	Pyruvate metabolism	comp53493_c0	ccl-miR171	sp|P08997|MASY_ECOLI Malate synthase A OS=Escherichia coli (strain K12) GN=aceB PE=1 SV=1
ko00620	Pyruvate metabolism	comp68300_c0	ccl-miR171	sp|B1IW07|MUKB_ECOLC Chromosome partition protein MukB OS=Escherichia coli (strain ATCC 8739 / DSM 1576 / Crooks) GN=mukB PE=3 SV=1
ko00620	Pyruvate metabolism	comp62562_c0	ccl-miR171	sp|B7MNB1|OPGB_ECO45 Phosphoglycerol transferase I OS=Escherichia coli O45:K1 (strain S88 / ExPEC) GN=mdoB PE=3 SV=1
ko00620	Pyruvate metabolism	comp62562_c0	ccl-miR171	sp|B7MNB1|OPGB_ECO45 Phosphoglycerol transferase I OS=Escherichia coli O45:K1 (strain S88 / ExPEC) GN=mdoB PE=3 SV=1
ko00620	Pyruvate metabolism	comp65000_c0	col-miRn-3p-91142_48	sp|Q8RWN9|OPD22_ARATH Dihydrolipoyllysine-residue acetyltransferase component 2 of pyruvate dehydrogenase complex, mitochondrial OS=Arabidopsis thaliana GN=At3g13930 PE=1 SV=2
ko00010	Glycolysis / Gluconeogenesis	comp68186_c0	mdm-MIR391-p5_2ss16CT20GA	sp|P65254|LLDP_ECO57 L-lactate permease OS=Escherichia coli O157:H7 GN=lldP PE=3 SV=1
ko00010	Glycolysis / Gluconeogenesis	comp68387_c0	mdm-MIR391-p5_2ss16CT20GA	sp|P77748|YDIJ_ECOLI Uncharacterized protein YdiJ OS=Escherichia coli (strain K12) GN=ydiJ PE=4 SV=1
ko00010	Glycolysis / Gluconeogenesis	comp64577_c0	mdm-MIR391-p5_2ss16CT20GA	sp|P0ABD0|BETT_ECO57 High-affinity choline transport protein OS=Escherichia coli O157:H7 GN=betT PE=3 SV=1
ko00010	Glycolysis / Gluconeogenesis	comp68413_c0	csi-miR1515_1ss16AG	sp|P14294|TOP3_ECOLI DNA topoisomerase 3 OS=Escherichia coli (strain K12) GN=topB PE=1 SV=1
ko00010	Glycolysis / Gluconeogenesis	comp68186_c0	csi-miR1515_1ss16AG	sp|P65254|LLDP_ECO57 L-lactate permease OS=Escherichia coli O157:H7 GN=lldP PE=3 SV=1
ko00010	Glycolysis / Gluconeogenesis	comp66556_c1	csi-miR1515_1ss16AG	sp|P36938|PGM_ECOLI Phosphoglucomutase OS=Escherichia coli (strain K12) GN=pgm PE=1 SV=1
ko00010	Glycolysis / Gluconeogenesis	comp68457_c0	bol-miR171a_1ss19AG	sp|P77802|YAGX_ECOLI Uncharacterized protein YagX OS=Escherichia coli (strain K12) GN=yagX PE=4 SV=1
ko00010	Glycolysis / Gluconeogenesis	comp68529_c0	bol-miR171a_1ss19AG	sp|P43329|HRPA_ECOLI ATP-dependent RNA helicase HrpA OS=Escherichia coli (strain K12) GN=hrpA PE=3 SV=3
ko00010	Glycolysis / Gluconeogenesis	comp68419_c0	bol-miR171a_1ss19AG	sp|P52647|NIFJ_ECOLI Probable pyruvate-flavodoxin oxidoreductase OS=Escherichia coli (strain K12) GN=ydbK PE=3 SV=2
ko00010	Glycolysis / Gluconeogenesis	comp68413_c0	bol-miR171a_1ss19AG	sp|P14294|TOP3_ECOLI DNA topoisomerase 3 OS=Escherichia coli (strain K12) GN=topB PE=1 SV=1
ko00010	Glycolysis / Gluconeogenesis	comp68319_c0	col-miRn-3p-16403_272	sp|P77802|YAGX_ECOLI Uncharacterized protein YagX OS=Escherichia coli (strain K12) GN=yagX PE=4 SV=1
ko00010	Glycolysis / Gluconeogenesis	comp68319_c0	col-miRn-3p-16403_272	sp|P77802|YAGX_ECOLI Uncharacterized protein YagX OS=Escherichia coli (strain K12) GN=yagX PE=4 SV=1
ko00010	Glycolysis / Gluconeogenesis	comp68044_c0	col-miRn-3p-16403_272	sp|Q9XE58|SCL14_ARATH Scarecrow-like protein 14 OS=Arabidopsis thaliana GN=SCL14 PE=2 SV=2
ko00010	Glycolysis / Gluconeogenesis	comp68063_c0	col-miRn-3p-16403_272	sp|Q46811|YGFK_ECOLI Uncharacterized protein YgfK OS=Escherichia coli (strain K12) GN=ygfK PE=4 SV=1
ko00010	Glycolysis / Gluconeogenesis	comp66556_c1	col-miRn-3p-16403_272	sp|P36938|PGM_ECOLI Phosphoglucomutase OS=Escherichia coli (strain K12) GN=pgm PE=1 SV=1
ko00010	Glycolysis / Gluconeogenesis	comp62562_c0	col-miRn-3p-253727_10	sp|B7MNB1|OPGB_ECO45 Phosphoglycerol transferase I OS=Escherichia coli O45:K1 (strain S88 / ExPEC) GN=mdoB PE=3 SV=1
ko00010	Glycolysis / Gluconeogenesis	comp68186_c0	col-miRn-3p-253727_10	sp|P65254|LLDP_ECO57 L-lactate permease OS=Escherichia coli O157:H7 GN=lldP PE=3 SV=1
ko00010	Glycolysis / Gluconeogenesis	comp60159_c0	col-miRn-3p-253727_10	sp|P52903|ODPA_SOLTU Pyruvate dehydrogenase E1 component subunit alpha, mitochondrial OS=Solanum tuberosum PE=1 SV=1
ko00010	Glycolysis / Gluconeogenesis	comp68549_c0	col-miRn-3p-253727_10	sp|P14294|TOP3_ECOLI DNA topoisomerase 3 OS=Escherichia coli (strain K12) GN=topB PE=1 SV=1
ko00010	Glycolysis / Gluconeogenesis	comp68063_c0	csi-miR162-5p_L-1_1ss5GC	sp|Q46811|YGFK_ECOLI Uncharacterized protein YgfK OS=Escherichia coli (strain K12) GN=ygfK PE=4 SV=1
ko00010	Glycolysis / Gluconeogenesis	comp66556_c1	csi-miR162-5p_L-1_1ss5GC	sp|P36938|PGM_ECOLI Phosphoglucomutase OS=Escherichia coli (strain K12) GN=pgm PE=1 SV=1
ko00010	Glycolysis / Gluconeogenesis	comp68529_c0	csi-miR162-5p_L-1_1ss5GC	sp|P43329|HRPA_ECOLI ATP-dependent RNA helicase HrpA OS=Escherichia coli (strain K12) GN=hrpA PE=3 SV=3
ko00010	Glycolysis / Gluconeogenesis	comp67979_c0	csi-miR162-5p_L-1_1ss5GC	sp|P0AEC7|BARA_ECO57 Signal transduction histidine-protein kinase BarA OS=Escherichia coli O157:H7 GN=barA PE=3 SV=1
ko00010	Glycolysis / Gluconeogenesis	comp64577_c0	col-miRn-3p-145806_25	sp|P0ABD0|BETT_ECO57 High-affinity choline transport protein OS=Escherichia coli O157:H7 GN=betT PE=3 SV=1
ko00010	Glycolysis / Gluconeogenesis	comp68044_c0	ppe-miR399b_L-2R+2	sp|Q9XE58|SCL14_ARATH Scarecrow-like protein 14 OS=Arabidopsis thaliana GN=SCL14 PE=2 SV=2
ko00010	Glycolysis / Gluconeogenesis	comp68457_c0	ppe-miR399b_L-2R+2	sp|P77802|YAGX_ECOLI Uncharacterized protein YagX OS=Escherichia coli (strain K12) GN=yagX PE=4 SV=1
ko00010	Glycolysis / Gluconeogenesis	comp55426_c0	ppe-miR399b_L-2R+2	sp|Q8W033|AL3I1_ARATH Aldehyde dehydrogenase family 3 member I1, chloroplastic OS=Arabidopsis thaliana GN=ALDH3I1 PE=2 SV=2
ko00010	Glycolysis / Gluconeogenesis	comp62562_c0	crt-miR168_L-2	sp|B7MNB1|OPGB_ECO45 Phosphoglycerol transferase I OS=Escherichia coli O45:K1 (strain S88 / ExPEC) GN=mdoB PE=3 SV=1
ko00010	Glycolysis / Gluconeogenesis	comp62562_c0	crt-miR168_L-2	sp|B7MNB1|OPGB_ECO45 Phosphoglycerol transferase I OS=Escherichia coli O45:K1 (strain S88 / ExPEC) GN=mdoB PE=3 SV=1
ko00010	Glycolysis / Gluconeogenesis	comp68063_c0	crt-miR168_L-2	sp|Q46811|YGFK_ECOLI Uncharacterized protein YgfK OS=Escherichia coli (strain K12) GN=ygfK PE=4 SV=1
ko00010	Glycolysis / Gluconeogenesis	comp68549_c0	crt-miR168_L-2	sp|P14294|TOP3_ECOLI DNA topoisomerase 3 OS=Escherichia coli (strain K12) GN=topB PE=1 SV=1
ko00010	Glycolysis / Gluconeogenesis	comp68319_c0	crt-miR168_L-2	sp|P77802|YAGX_ECOLI Uncharacterized protein YagX OS=Escherichia coli (strain K12) GN=yagX PE=4 SV=1
ko00010	Glycolysis / Gluconeogenesis	comp605693_c0	crt-miR168_L-2	sp|O68040|ACSA_RHOCB Acetyl-coenzyme A synthetase OS=Rhodobacter capsulatus (strain ATCC BAA-309 / NBRC 16581 / SB1003) GN=acsA PE=3 SV=1
ko00010	Glycolysis / Gluconeogenesis	comp68457_c0	crt-miR168_L-2	sp|P77802|YAGX_ECOLI Uncharacterized protein YagX OS=Escherichia coli (strain K12) GN=yagX PE=4 SV=1
ko00010	Glycolysis / Gluconeogenesis	comp45583_c0	crt-miR168_L-2	sp|A7ZIA4|FRMA_ECO24 S-(hydroxymethyl)glutathione dehydrogenase OS=Escherichia coli O139:H28 (strain E24377A / ETEC) GN=frmA PE=3 SV=1
ko00010	Glycolysis / Gluconeogenesis	comp67979_c0	ptc-miR172a	sp|P0AEC7|BARA_ECO57 Signal transduction histidine-protein kinase BarA OS=Escherichia coli O157:H7 GN=barA PE=3 SV=1
ko00010	Glycolysis / Gluconeogenesis	comp63301_c0	ptc-miR172a	-
ko00010	Glycolysis / Gluconeogenesis	comp68319_c0	ptc-miR172a	sp|P77802|YAGX_ECOLI Uncharacterized protein YagX OS=Escherichia coli (strain K12) GN=yagX PE=4 SV=1
ko00010	Glycolysis / Gluconeogenesis	comp68529_c0	aly-miR169b-3p_2ss12C-15CT	sp|P43329|HRPA_ECOLI ATP-dependent RNA helicase HrpA OS=Escherichia coli (strain K12) GN=hrpA PE=3 SV=3
ko00010	Glycolysis / Gluconeogenesis	comp67128_c0	aly-miR169b-3p_2ss12C-15CT	sp|Q9SU63|AL2B4_ARATH Aldehyde dehydrogenase family 2 member B4, mitochondrial OS=Arabidopsis thaliana GN=ALDH2B4 PE=2 SV=1
ko00010	Glycolysis / Gluconeogenesis	comp67000_c0	col-miRn-3p-18781_243	sp|Q9T074|PCKA_ARATH Phosphoenolpyruvate carboxykinase [ATP] OS=Arabidopsis thaliana GN=PCKA PE=1 SV=1
ko00010	Glycolysis / Gluconeogenesis	comp68457_c0	sly-miR319c-5p_2ss8CT15CT	sp|P77802|YAGX_ECOLI Uncharacterized protein YagX OS=Escherichia coli (strain K12) GN=yagX PE=4 SV=1
ko00010	Glycolysis / Gluconeogenesis	comp68529_c0	mes-miR156a	sp|P43329|HRPA_ECOLI ATP-dependent RNA helicase HrpA OS=Escherichia coli (strain K12) GN=hrpA PE=3 SV=3
ko00010	Glycolysis / Gluconeogenesis	comp67979_c0	mes-miR156a	sp|P0AEC7|BARA_ECO57 Signal transduction histidine-protein kinase BarA OS=Escherichia coli O157:H7 GN=barA PE=3 SV=1
ko00010	Glycolysis / Gluconeogenesis	comp64928_c0	hbr-MIR159b-p5_1ss10GT	sp|B9DGD6|ACS_ARATH Acetate--CoA ligase ACS, chloroplastic/glyoxysomal OS=Arabidopsis thaliana GN=ACS PE=1 SV=1
ko00010	Glycolysis / Gluconeogenesis	comp68549_c0	col-miRn-3p-61053_79	sp|P14294|TOP3_ECOLI DNA topoisomerase 3 OS=Escherichia coli (strain K12) GN=topB PE=1 SV=1
ko00010	Glycolysis / Gluconeogenesis	comp68529_c0	mtr-miR156a_L+1R-1_1ss4AC	sp|P43329|HRPA_ECOLI ATP-dependent RNA helicase HrpA OS=Escherichia coli (strain K12) GN=hrpA PE=3 SV=3
ko00010	Glycolysis / Gluconeogenesis	comp68549_c0	mtr-miR156a_L+1R-1_1ss4AC	sp|P14294|TOP3_ECOLI DNA topoisomerase 3 OS=Escherichia coli (strain K12) GN=topB PE=1 SV=1
ko00010	Glycolysis / Gluconeogenesis	comp68549_c0	htu-miR393a_R-1_1ss21CT	sp|P14294|TOP3_ECOLI DNA topoisomerase 3 OS=Escherichia coli (strain K12) GN=topB PE=1 SV=1
ko00010	Glycolysis / Gluconeogenesis	comp33183_c0	csi-miR172c_L-1_1ss6TA	sp|O24457|ODPA3_ARATH Pyruvate dehydrogenase E1 component subunit alpha-3, chloroplastic OS=Arabidopsis thaliana GN=PDH-E1 ALPHA PE=1 SV=1
ko00010	Glycolysis / Gluconeogenesis	comp68319_c0	csi-miR172c_L-1_1ss6TA	sp|P77802|YAGX_ECOLI Uncharacterized protein YagX OS=Escherichia coli (strain K12) GN=yagX PE=4 SV=1
ko00010	Glycolysis / Gluconeogenesis	comp68529_c0	pvu-miR159a.1	sp|P43329|HRPA_ECOLI ATP-dependent RNA helicase HrpA OS=Escherichia coli (strain K12) GN=hrpA PE=3 SV=3
ko00010	Glycolysis / Gluconeogenesis	comp67987_c0	han-miR156a_L+1	sp|O65735|ALF_CICAR Fructose-bisphosphate aldolase, cytoplasmic isozyme OS=Cicer arietinum GN=ALDC PE=1 SV=1
ko00010	Glycolysis / Gluconeogenesis	comp68529_c0	han-miR156a_L+1	sp|P43329|HRPA_ECOLI ATP-dependent RNA helicase HrpA OS=Escherichia coli (strain K12) GN=hrpA PE=3 SV=3
ko00010	Glycolysis / Gluconeogenesis	comp68457_c0	aly-MIR394a-p3_2ss16CA17TG	sp|P77802|YAGX_ECOLI Uncharacterized protein YagX OS=Escherichia coli (strain K12) GN=yagX PE=4 SV=1
ko00010	Glycolysis / Gluconeogenesis	comp28650_c0	aly-MIR394a-p3_2ss16CA17TG	sp|O65595|KPYC_ARATH Probable pyruvate kinase, cytosolic isozyme OS=Arabidopsis thaliana GN=At4g26390 PE=3 SV=1
ko00010	Glycolysis / Gluconeogenesis	comp68186_c0	aly-MIR394a-p3_2ss16CA17TG	sp|P65254|LLDP_ECO57 L-lactate permease OS=Escherichia coli O157:H7 GN=lldP PE=3 SV=1
ko00010	Glycolysis / Gluconeogenesis	comp68319_c0	aly-MIR394a-p3_2ss16CA17TG	sp|P77802|YAGX_ECOLI Uncharacterized protein YagX OS=Escherichia coli (strain K12) GN=yagX PE=4 SV=1
ko00010	Glycolysis / Gluconeogenesis	comp68319_c0	aly-MIR394a-p3_2ss16CA17TG	sp|P77802|YAGX_ECOLI Uncharacterized protein YagX OS=Escherichia coli (strain K12) GN=yagX PE=4 SV=1
ko00010	Glycolysis / Gluconeogenesis	comp68063_c0	aly-MIR394a-p3_2ss16CA17TG	sp|Q46811|YGFK_ECOLI Uncharacterized protein YgfK OS=Escherichia coli (strain K12) GN=ygfK PE=4 SV=1
ko00010	Glycolysis / Gluconeogenesis	comp68413_c0	aly-MIR394a-p3_2ss16CA17TG	sp|P14294|TOP3_ECOLI DNA topoisomerase 3 OS=Escherichia coli (strain K12) GN=topB PE=1 SV=1
ko00010	Glycolysis / Gluconeogenesis	comp68387_c0	aly-MIR394a-p3_2ss16CA17TG	sp|P77748|YDIJ_ECOLI Uncharacterized protein YdiJ OS=Escherichia coli (strain K12) GN=ydiJ PE=4 SV=1
ko00010	Glycolysis / Gluconeogenesis	comp68413_c0	ppe-miR397_1ss10GC	sp|P14294|TOP3_ECOLI DNA topoisomerase 3 OS=Escherichia coli (strain K12) GN=topB PE=1 SV=1
ko00010	Glycolysis / Gluconeogenesis	comp67999_c0	ppe-miR397_1ss10GC	sp|P77748|YDIJ_ECOLI Uncharacterized protein YdiJ OS=Escherichia coli (strain K12) GN=ydiJ PE=4 SV=1
ko00010	Glycolysis / Gluconeogenesis	comp68549_c0	bcy-miR156_L-1	sp|P14294|TOP3_ECOLI DNA topoisomerase 3 OS=Escherichia coli (strain K12) GN=topB PE=1 SV=1
ko00010	Glycolysis / Gluconeogenesis	comp68387_c0	bcy-miR156_L-1	sp|P77748|YDIJ_ECOLI Uncharacterized protein YdiJ OS=Escherichia coli (strain K12) GN=ydiJ PE=4 SV=1
ko00010	Glycolysis / Gluconeogenesis	comp68387_c0	bcy-miR156_L-1	sp|P77748|YDIJ_ECOLI Uncharacterized protein YdiJ OS=Escherichia coli (strain K12) GN=ydiJ PE=4 SV=1
ko00010	Glycolysis / Gluconeogenesis	comp68387_c0	bcy-miR156_L-1	sp|P77748|YDIJ_ECOLI Uncharacterized protein YdiJ OS=Escherichia coli (strain K12) GN=ydiJ PE=4 SV=1
ko00010	Glycolysis / Gluconeogenesis	comp67979_c0	bcy-miR156_L-1	sp|P0AEC7|BARA_ECO57 Signal transduction histidine-protein kinase BarA OS=Escherichia coli O157:H7 GN=barA PE=3 SV=1
ko00010	Glycolysis / Gluconeogenesis	comp63382_c0	bcy-miR156_L-1	sp|A1TC01|GPGP_MYCVP Glucosyl-3-phosphoglycerate phosphatase OS=Mycobacterium vanbaalenii (strain DSM 7251 / PYR-1) GN=gpgP PE=1 SV=1
ko00010	Glycolysis / Gluconeogenesis	comp45583_c0	ssl-miR171b	sp|A7ZIA4|FRMA_ECO24 S-(hydroxymethyl)glutathione dehydrogenase OS=Escherichia coli O139:H28 (strain E24377A / ETEC) GN=frmA PE=3 SV=1
ko00010	Glycolysis / Gluconeogenesis	comp68419_c0	ssl-miR171b	sp|P52647|NIFJ_ECOLI Probable pyruvate-flavodoxin oxidoreductase OS=Escherichia coli (strain K12) GN=ydbK PE=3 SV=2
ko00010	Glycolysis / Gluconeogenesis	comp68063_c0	ssl-miR171b	sp|Q46811|YGFK_ECOLI Uncharacterized protein YgfK OS=Escherichia coli (strain K12) GN=ygfK PE=4 SV=1
ko00010	Glycolysis / Gluconeogenesis	comp64577_c0	ssl-miR171b	sp|P0ABD0|BETT_ECO57 High-affinity choline transport protein OS=Escherichia coli O157:H7 GN=betT PE=3 SV=1
ko00010	Glycolysis / Gluconeogenesis	comp68063_c0	vvi-miR160c_L+1R-1	sp|Q46811|YGFK_ECOLI Uncharacterized protein YgfK OS=Escherichia coli (strain K12) GN=ygfK PE=4 SV=1
ko00010	Glycolysis / Gluconeogenesis	comp68529_c0	mtr-miR156h-3p_1ss8AC	sp|P43329|HRPA_ECOLI ATP-dependent RNA helicase HrpA OS=Escherichia coli (strain K12) GN=hrpA PE=3 SV=3
ko00010	Glycolysis / Gluconeogenesis	comp68419_c0	mtr-miR156h-3p_1ss8AC	sp|P52647|NIFJ_ECOLI Probable pyruvate-flavodoxin oxidoreductase OS=Escherichia coli (strain K12) GN=ydbK PE=3 SV=2
ko00010	Glycolysis / Gluconeogenesis	comp66556_c1	mtr-miR156h-3p_1ss8AC	sp|P36938|PGM_ECOLI Phosphoglucomutase OS=Escherichia coli (strain K12) GN=pgm PE=1 SV=1
ko00010	Glycolysis / Gluconeogenesis	comp60238_c0	ath-MIR5645e-p5_2ss18TG20TG	sp|Q9M5K3|DLDH1_ARATH Dihydrolipoyl dehydrogenase 1, mitochondrial OS=Arabidopsis thaliana GN=LPD1 PE=1 SV=2
ko00010	Glycolysis / Gluconeogenesis	comp68085_c0	ath-MIR5645e-p5_2ss18TG20TG	sp|Q9LPS1|HXK3_ARATH Hexokinase-3 OS=Arabidopsis thaliana GN=At1g50460 PE=1 SV=1
ko00010	Glycolysis / Gluconeogenesis	comp68063_c0	ath-MIR5645e-p5_2ss18TG20TG	sp|Q46811|YGFK_ECOLI Uncharacterized protein YgfK OS=Escherichia coli (strain K12) GN=ygfK PE=4 SV=1
ko00010	Glycolysis / Gluconeogenesis	comp68529_c0	ath-MIR5645e-p5_2ss18TG20TG	sp|P43329|HRPA_ECOLI ATP-dependent RNA helicase HrpA OS=Escherichia coli (strain K12) GN=hrpA PE=3 SV=3
ko00010	Glycolysis / Gluconeogenesis	comp68387_c0	ath-MIR5645e-p5_2ss18TG20TG	sp|P77748|YDIJ_ECOLI Uncharacterized protein YdiJ OS=Escherichia coli (strain K12) GN=ydiJ PE=4 SV=1
ko00010	Glycolysis / Gluconeogenesis	comp60238_c0	gma-MIR4393b-p3_2ss9AG18AG	sp|Q9M5K3|DLDH1_ARATH Dihydrolipoyl dehydrogenase 1, mitochondrial OS=Arabidopsis thaliana GN=LPD1 PE=1 SV=2
ko00010	Glycolysis / Gluconeogenesis	comp58812_c0	gma-MIR4393b-p3_2ss9AG18AG	sp|P30864|YAFC_ECOLI Uncharacterized HTH-type transcriptional regulator YafC OS=Escherichia coli (strain K12) GN=yafC PE=4 SV=1
ko00010	Glycolysis / Gluconeogenesis	comp68063_c0	gma-MIR4393b-p3_2ss9AG18AG	sp|Q46811|YGFK_ECOLI Uncharacterized protein YgfK OS=Escherichia coli (strain K12) GN=ygfK PE=4 SV=1
ko00010	Glycolysis / Gluconeogenesis	comp68549_c0	gma-MIR4393b-p3_2ss9AG18AG	sp|P14294|TOP3_ECOLI DNA topoisomerase 3 OS=Escherichia coli (strain K12) GN=topB PE=1 SV=1
ko00010	Glycolysis / Gluconeogenesis	comp68387_c0	gma-MIR4393b-p3_2ss9AG18AG	sp|P77748|YDIJ_ECOLI Uncharacterized protein YdiJ OS=Escherichia coli (strain K12) GN=ydiJ PE=4 SV=1
ko00010	Glycolysis / Gluconeogenesis	comp68186_c0	gma-MIR4393b-p3_2ss9AG18AG	sp|P65254|LLDP_ECO57 L-lactate permease OS=Escherichia coli O157:H7 GN=lldP PE=3 SV=1
ko00010	Glycolysis / Gluconeogenesis	comp66556_c1	gma-MIR4393b-p3_2ss9AG18AG	sp|P36938|PGM_ECOLI Phosphoglucomutase OS=Escherichia coli (strain K12) GN=pgm PE=1 SV=1
ko00010	Glycolysis / Gluconeogenesis	comp68186_c0	mes-miR530a_R+1_1ss20TG	sp|P65254|LLDP_ECO57 L-lactate permease OS=Escherichia coli O157:H7 GN=lldP PE=3 SV=1
ko00010	Glycolysis / Gluconeogenesis	comp68419_c0	mes-miR530a_R+1_1ss20TG	sp|P52647|NIFJ_ECOLI Probable pyruvate-flavodoxin oxidoreductase OS=Escherichia coli (strain K12) GN=ydbK PE=3 SV=2
ko00010	Glycolysis / Gluconeogenesis	comp44738_c0	mes-miR530a_R+1_1ss20TG	sp|F4KBF3|AAE17_ARATH Probable acyl-activating enzyme 17, peroxisomal OS=Arabidopsis thaliana GN=AAE17 PE=2 SV=1
ko00010	Glycolysis / Gluconeogenesis	comp68319_c0	aqc-miR169c_R+1_1ss20GA	sp|P77802|YAGX_ECOLI Uncharacterized protein YagX OS=Escherichia coli (strain K12) GN=yagX PE=4 SV=1
ko00010	Glycolysis / Gluconeogenesis	comp68063_c0	ppe-MIR482a-p3_3ss12TA21AT22AC	sp|Q46811|YGFK_ECOLI Uncharacterized protein YgfK OS=Escherichia coli (strain K12) GN=ygfK PE=4 SV=1
ko00010	Glycolysis / Gluconeogenesis	comp64825_c0	gra-MIR482d-p3_2ss13CT17CT	sp|P14673|ADH1_SOLTU Alcohol dehydrogenase 1 OS=Solanum tuberosum GN=ADH1 PE=2 SV=1
ko00010	Glycolysis / Gluconeogenesis	comp68457_c0	rco-miR171c	sp|P77802|YAGX_ECOLI Uncharacterized protein YagX OS=Escherichia coli (strain K12) GN=yagX PE=4 SV=1
ko00010	Glycolysis / Gluconeogenesis	comp68529_c0	rco-miR171c	sp|P43329|HRPA_ECOLI ATP-dependent RNA helicase HrpA OS=Escherichia coli (strain K12) GN=hrpA PE=3 SV=3
ko00010	Glycolysis / Gluconeogenesis	comp68387_c0	mdm-miR7122a_2ss4TA21CG	sp|P77748|YDIJ_ECOLI Uncharacterized protein YdiJ OS=Escherichia coli (strain K12) GN=ydiJ PE=4 SV=1
ko00010	Glycolysis / Gluconeogenesis	comp55426_c0	mdm-miR7122a_2ss4TA21CG	sp|Q8W033|AL3I1_ARATH Aldehyde dehydrogenase family 3 member I1, chloroplastic OS=Arabidopsis thaliana GN=ALDH3I1 PE=2 SV=2
ko00010	Glycolysis / Gluconeogenesis	comp67999_c0	gma-miR171m	sp|P77748|YDIJ_ECOLI Uncharacterized protein YdiJ OS=Escherichia coli (strain K12) GN=ydiJ PE=4 SV=1
ko00010	Glycolysis / Gluconeogenesis	comp52273_c0	ccl-miR167a	sp|B7LAX0|G6PI_ECO55 Glucose-6-phosphate isomerase OS=Escherichia coli (strain 55989 / EAEC) GN=pgi PE=3 SV=1
ko00010	Glycolysis / Gluconeogenesis	comp68319_c0	ccl-miR167a	sp|P77802|YAGX_ECOLI Uncharacterized protein YagX OS=Escherichia coli (strain K12) GN=yagX PE=4 SV=1
ko00010	Glycolysis / Gluconeogenesis	comp64928_c0	tcc-miR162	sp|B9DGD6|ACS_ARATH Acetate--CoA ligase ACS, chloroplastic/glyoxysomal OS=Arabidopsis thaliana GN=ACS PE=1 SV=1
ko00010	Glycolysis / Gluconeogenesis	comp65468_c0	col-miRn-5p-315953_8	sp|Q8W4F0|DAR1_ARATH Protein DA1-related 1 OS=Arabidopsis thaliana GN=DAR1 PE=2 SV=3
ko00010	Glycolysis / Gluconeogenesis	comp68319_c0	ath-miR390a-5p	sp|P77802|YAGX_ECOLI Uncharacterized protein YagX OS=Escherichia coli (strain K12) GN=yagX PE=4 SV=1
ko00010	Glycolysis / Gluconeogenesis	comp65052_c0	ppe-miR1511-3p_L+1R-4	sp|Q94AA4|K6PF3_ARATH 6-phosphofructokinase 3 OS=Arabidopsis thaliana GN=PFK3 PE=1 SV=1
ko00010	Glycolysis / Gluconeogenesis	comp43617_c0	ppe-miR1511-3p_L+1R-4	sp|A7ZIA4|FRMA_ECO24 S-(hydroxymethyl)glutathione dehydrogenase OS=Escherichia coli O139:H28 (strain E24377A / ETEC) GN=frmA PE=3 SV=1
ko00010	Glycolysis / Gluconeogenesis	comp68387_c0	ppe-miR1511-3p_L+1R-4	sp|P77748|YDIJ_ECOLI Uncharacterized protein YdiJ OS=Escherichia coli (strain K12) GN=ydiJ PE=4 SV=1
ko00010	Glycolysis / Gluconeogenesis	comp45563_c0	ppe-miR1511-3p_L+1R-4	sp|O57742|APGM_PYRHO 2,3-bisphosphoglycerate-independent phosphoglycerate mutase OS=Pyrococcus horikoshii (strain ATCC 700860 / DSM 12428 / JCM 9974 / NBRC 100139 / OT-3) GN=apgM PE=1 SV=1
ko00010	Glycolysis / Gluconeogenesis	comp672577_c0	ppe-miR1511-3p_L+1R-4	sp|A4W5X6|F16PA_ENT38 Fructose-1,6-bisphosphatase class 1 OS=Enterobacter sp. (strain 638) GN=fbp PE=3 SV=1
ko00010	Glycolysis / Gluconeogenesis	comp53573_c0	ppe-miR1511-3p_L+1R-4	sp|P48494|TPIS_ORYSJ Triosephosphate isomerase, cytosolic OS=Oryza sativa subsp. japonica GN=TPI PE=1 SV=3
ko00010	Glycolysis / Gluconeogenesis	comp62750_c0	ppe-miR1511-3p_L+1R-4	sp|Q43117|KPYA_RICCO Pyruvate kinase isozyme A, chloroplastic OS=Ricinus communis PE=1 SV=1
ko00010	Glycolysis / Gluconeogenesis	comp68549_c0	ppe-miR1511-3p_L+1R-4	sp|P14294|TOP3_ECOLI DNA topoisomerase 3 OS=Escherichia coli (strain K12) GN=topB PE=1 SV=1
ko00010	Glycolysis / Gluconeogenesis	comp68413_c0	ppe-miR1511-3p_L+1R-4	sp|P14294|TOP3_ECOLI DNA topoisomerase 3 OS=Escherichia coli (strain K12) GN=topB PE=1 SV=1
ko00010	Glycolysis / Gluconeogenesis	comp68370_c0	ppe-miR1511-3p_L+1R-4	sp|O64688|ODPB3_ARATH Pyruvate dehydrogenase E1 component subunit beta-3, chloroplastic OS=Arabidopsis thaliana GN=E1-BETA-2 PE=2 SV=1
ko00010	Glycolysis / Gluconeogenesis	comp62562_c0	ppe-miR1511-3p_L+1R-4	sp|B7MNB1|OPGB_ECO45 Phosphoglycerol transferase I OS=Escherichia coli O45:K1 (strain S88 / ExPEC) GN=mdoB PE=3 SV=1
ko00010	Glycolysis / Gluconeogenesis	comp67979_c0	ppe-miR1511-3p_L+1R-4	sp|P0AEC7|BARA_ECO57 Signal transduction histidine-protein kinase BarA OS=Escherichia coli O157:H7 GN=barA PE=3 SV=1
ko00010	Glycolysis / Gluconeogenesis	comp59847_c0	ppe-miR1511-3p_L+1R-4	sp|Q6Z1G7|ODPB1_ORYSJ Pyruvate dehydrogenase E1 component subunit beta-1, mitochondrial OS=Oryza sativa subsp. japonica GN=Os08g0536000 PE=2 SV=1
ko00010	Glycolysis / Gluconeogenesis	comp54469_c0	ppe-miR1511-3p_L+1R-4	sp|Q9SM59|PGMP_PEA Phosphoglucomutase, chloroplastic OS=Pisum sativum GN=PGMP PE=1 SV=1
ko00010	Glycolysis / Gluconeogenesis	comp65561_c0	ppe-miR1511-3p_L+1R-4	sp|O24457|ODPA3_ARATH Pyruvate dehydrogenase E1 component subunit alpha-3, chloroplastic OS=Arabidopsis thaliana GN=PDH-E1 ALPHA PE=1 SV=1
ko00010	Glycolysis / Gluconeogenesis	comp68457_c0	mdm-miR408a_L-1R+1	sp|P77802|YAGX_ECOLI Uncharacterized protein YagX OS=Escherichia coli (strain K12) GN=yagX PE=4 SV=1
ko00010	Glycolysis / Gluconeogenesis	comp68319_c0	tcc-miR390a	sp|P77802|YAGX_ECOLI Uncharacterized protein YagX OS=Escherichia coli (strain K12) GN=yagX PE=4 SV=1
ko00010	Glycolysis / Gluconeogenesis	comp68457_c0	aly-miR399f-3p	sp|P77802|YAGX_ECOLI Uncharacterized protein YagX OS=Escherichia coli (strain K12) GN=yagX PE=4 SV=1
ko00010	Glycolysis / Gluconeogenesis	comp62562_c0	aly-miR399f-3p	sp|B7MNB1|OPGB_ECO45 Phosphoglycerol transferase I OS=Escherichia coli O45:K1 (strain S88 / ExPEC) GN=mdoB PE=3 SV=1
ko00010	Glycolysis / Gluconeogenesis	comp68413_c0	aly-miR399f-3p	sp|P14294|TOP3_ECOLI DNA topoisomerase 3 OS=Escherichia coli (strain K12) GN=topB PE=1 SV=1
ko00010	Glycolysis / Gluconeogenesis	comp67999_c0	aly-miR399f-3p	sp|P77748|YDIJ_ECOLI Uncharacterized protein YdiJ OS=Escherichia coli (strain K12) GN=ydiJ PE=4 SV=1
ko00010	Glycolysis / Gluconeogenesis	comp67999_c0	aly-miR399f-3p	sp|P77748|YDIJ_ECOLI Uncharacterized protein YdiJ OS=Escherichia coli (strain K12) GN=ydiJ PE=4 SV=1
ko00010	Glycolysis / Gluconeogenesis	comp68319_c0	aly-miR399f-3p	sp|P77802|YAGX_ECOLI Uncharacterized protein YagX OS=Escherichia coli (strain K12) GN=yagX PE=4 SV=1
ko00010	Glycolysis / Gluconeogenesis	comp68529_c0	aly-miR399f-3p	sp|P43329|HRPA_ECOLI ATP-dependent RNA helicase HrpA OS=Escherichia coli (strain K12) GN=hrpA PE=3 SV=3
ko00010	Glycolysis / Gluconeogenesis	comp67907_c0	hpe-miR162a_L-2	sp|Q6MEW4|GPMA_PARUW 2,3-bisphosphoglycerate-dependent phosphoglycerate mutase OS=Protochlamydia amoebophila (strain UWE25) GN=gpmA PE=3 SV=1
ko00010	Glycolysis / Gluconeogenesis	comp68319_c0	hpe-miR162a_L-2	sp|P77802|YAGX_ECOLI Uncharacterized protein YagX OS=Escherichia coli (strain K12) GN=yagX PE=4 SV=1
ko00010	Glycolysis / Gluconeogenesis	comp68319_c0	hpe-miR162a_L-2	sp|P77802|YAGX_ECOLI Uncharacterized protein YagX OS=Escherichia coli (strain K12) GN=yagX PE=4 SV=1
ko00010	Glycolysis / Gluconeogenesis	comp68387_c0	hpe-miR162a_L-2	sp|P77748|YDIJ_ECOLI Uncharacterized protein YdiJ OS=Escherichia coli (strain K12) GN=ydiJ PE=4 SV=1
ko00010	Glycolysis / Gluconeogenesis	comp65342_c0	hpe-miR162a_L-2	sp|P42895|ENO2_MAIZE Enolase 2 OS=Zea mays GN=ENO2 PE=2 SV=1
ko00010	Glycolysis / Gluconeogenesis	comp33208_c0	hpe-miR162a_L-2	sp|O64422|F16P1_ORYSJ Fructose-1,6-bisphosphatase, chloroplastic OS=Oryza sativa subsp. japonica GN=Os03g0267300 PE=2 SV=1
ko00010	Glycolysis / Gluconeogenesis	comp64928_c0	hpe-miR162a_L-2	sp|B9DGD6|ACS_ARATH Acetate--CoA ligase ACS, chloroplastic/glyoxysomal OS=Arabidopsis thaliana GN=ACS PE=1 SV=1
ko00010	Glycolysis / Gluconeogenesis	comp65052_c0	col-miRn-5p-166889_20	sp|Q94AA4|K6PF3_ARATH 6-phosphofructokinase 3 OS=Arabidopsis thaliana GN=PFK3 PE=1 SV=1
ko00010	Glycolysis / Gluconeogenesis	comp67999_c0	col-miRn-5p-166889_20	sp|P77748|YDIJ_ECOLI Uncharacterized protein YdiJ OS=Escherichia coli (strain K12) GN=ydiJ PE=4 SV=1
ko00010	Glycolysis / Gluconeogenesis	comp60238_c0	ath-MIR5645e-p3_1ss18TA	sp|Q9M5K3|DLDH1_ARATH Dihydrolipoyl dehydrogenase 1, mitochondrial OS=Arabidopsis thaliana GN=LPD1 PE=1 SV=2
ko00010	Glycolysis / Gluconeogenesis	comp68085_c0	ath-MIR5645e-p3_1ss18TA	sp|Q9LPS1|HXK3_ARATH Hexokinase-3 OS=Arabidopsis thaliana GN=At1g50460 PE=1 SV=1
ko00010	Glycolysis / Gluconeogenesis	comp68063_c0	ath-MIR5645e-p3_1ss18TA	sp|Q46811|YGFK_ECOLI Uncharacterized protein YgfK OS=Escherichia coli (strain K12) GN=ygfK PE=4 SV=1
ko00010	Glycolysis / Gluconeogenesis	comp68387_c0	ath-MIR5645e-p3_1ss18TA	sp|P77748|YDIJ_ECOLI Uncharacterized protein YdiJ OS=Escherichia coli (strain K12) GN=ydiJ PE=4 SV=1
ko00010	Glycolysis / Gluconeogenesis	comp64577_c0	ath-MIR5645e-p3_1ss18TA	sp|P0ABD0|BETT_ECO57 High-affinity choline transport protein OS=Escherichia coli O157:H7 GN=betT PE=3 SV=1
ko00010	Glycolysis / Gluconeogenesis	comp68186_c0	col-miRn-3p-152189_23	sp|P65254|LLDP_ECO57 L-lactate permease OS=Escherichia coli O157:H7 GN=lldP PE=3 SV=1
ko00010	Glycolysis / Gluconeogenesis	comp68549_c0	hpe-miR166a_1ss5AC	sp|P14294|TOP3_ECOLI DNA topoisomerase 3 OS=Escherichia coli (strain K12) GN=topB PE=1 SV=1
ko00010	Glycolysis / Gluconeogenesis	comp67979_c0	peu-MIR2916-p3_2ss18TC19GA	sp|P0AEC7|BARA_ECO57 Signal transduction histidine-protein kinase BarA OS=Escherichia coli O157:H7 GN=barA PE=3 SV=1
ko00010	Glycolysis / Gluconeogenesis	comp52273_c0	dpr-miR167a_R+1	sp|B7LAX0|G6PI_ECO55 Glucose-6-phosphate isomerase OS=Escherichia coli (strain 55989 / EAEC) GN=pgi PE=3 SV=1
ko00010	Glycolysis / Gluconeogenesis	comp64577_c0	dpr-miR167a_R+1	sp|P0ABD0|BETT_ECO57 High-affinity choline transport protein OS=Escherichia coli O157:H7 GN=betT PE=3 SV=1
ko00010	Glycolysis / Gluconeogenesis	comp68319_c0	dpr-miR167a_R+1	sp|P77802|YAGX_ECOLI Uncharacterized protein YagX OS=Escherichia coli (strain K12) GN=yagX PE=4 SV=1
ko00010	Glycolysis / Gluconeogenesis	comp67979_c0	dpr-miR167a_R+1	sp|P0AEC7|BARA_ECO57 Signal transduction histidine-protein kinase BarA OS=Escherichia coli O157:H7 GN=barA PE=3 SV=1
ko00010	Glycolysis / Gluconeogenesis	comp67185_c0	gma-MIR5368-p3_1ss17CT_1	sp|P93338|GAPN_NICPL NADP-dependent glyceraldehyde-3-phosphate dehydrogenase OS=Nicotiana plumbaginifolia GN=GAPN PE=2 SV=1
ko00010	Glycolysis / Gluconeogenesis	comp68549_c0	stu-MIR5303j-p5_2ss10GT17CT	sp|P14294|TOP3_ECOLI DNA topoisomerase 3 OS=Escherichia coli (strain K12) GN=topB PE=1 SV=1
ko00010	Glycolysis / Gluconeogenesis	comp68413_c0	stu-MIR5303j-p5_2ss10GT17CT	sp|P14294|TOP3_ECOLI DNA topoisomerase 3 OS=Escherichia coli (strain K12) GN=topB PE=1 SV=1
ko00010	Glycolysis / Gluconeogenesis	comp62231_c0	stu-MIR5303j-p5_2ss10GT17CT	sp|Q9SYG7|AL7B4_ARATH Aldehyde dehydrogenase family 7 member B4 OS=Arabidopsis thaliana GN=ALDH7B4 PE=2 SV=3
ko00010	Glycolysis / Gluconeogenesis	comp68529_c0	stu-MIR5303j-p5_2ss10GT17CT	sp|P43329|HRPA_ECOLI ATP-dependent RNA helicase HrpA OS=Escherichia coli (strain K12) GN=hrpA PE=3 SV=3
ko00010	Glycolysis / Gluconeogenesis	comp68186_c0	stu-MIR5303j-p5_2ss10GT17CT	sp|P65254|LLDP_ECO57 L-lactate permease OS=Escherichia coli O157:H7 GN=lldP PE=3 SV=1
ko00010	Glycolysis / Gluconeogenesis	comp63126_c0	stu-MIR5303j-p5_2ss10GT17CT	sp|Q6Z1G7|ODPB1_ORYSJ Pyruvate dehydrogenase E1 component subunit beta-1, mitochondrial OS=Oryza sativa subsp. japonica GN=Os08g0536000 PE=2 SV=1
ko00010	Glycolysis / Gluconeogenesis	comp68387_c0	stu-MIR5303j-p5_2ss10GT17CT	sp|P77748|YDIJ_ECOLI Uncharacterized protein YdiJ OS=Escherichia coli (strain K12) GN=ydiJ PE=4 SV=1
ko00010	Glycolysis / Gluconeogenesis	comp26573_c0	stu-MIR5303j-p5_2ss10GT17CT	sp|Q9SK86|ADHL1_ARATH Alcohol dehydrogenase-like 1 OS=Arabidopsis thaliana GN=At1g22430 PE=2 SV=1
ko00010	Glycolysis / Gluconeogenesis	comp68186_c0	mdm-miR167h_1ss22AT	sp|P65254|LLDP_ECO57 L-lactate permease OS=Escherichia coli O157:H7 GN=lldP PE=3 SV=1
ko00010	Glycolysis / Gluconeogenesis	comp64966_c0	ctr-miR164_R-1	sp|Q42908|PMGI_MESCR 2,3-bisphosphoglycerate-independent phosphoglycerate mutase OS=Mesembryanthemum crystallinum GN=PGM1 PE=1 SV=1
ko00010	Glycolysis / Gluconeogenesis	comp68419_c0	ctr-miR164_R-1	sp|P52647|NIFJ_ECOLI Probable pyruvate-flavodoxin oxidoreductase OS=Escherichia coli (strain K12) GN=ydbK PE=3 SV=2
ko00010	Glycolysis / Gluconeogenesis	comp68549_c0	ctr-miR164_R-1	sp|P14294|TOP3_ECOLI DNA topoisomerase 3 OS=Escherichia coli (strain K12) GN=topB PE=1 SV=1
ko00010	Glycolysis / Gluconeogenesis	comp68549_c0	ctr-miR164_R-1	sp|P14294|TOP3_ECOLI DNA topoisomerase 3 OS=Escherichia coli (strain K12) GN=topB PE=1 SV=1
ko00010	Glycolysis / Gluconeogenesis	comp68319_c0	ctr-miR164_R-1	sp|P77802|YAGX_ECOLI Uncharacterized protein YagX OS=Escherichia coli (strain K12) GN=yagX PE=4 SV=1
ko00010	Glycolysis / Gluconeogenesis	comp68457_c0	ctr-miR164_R-1	sp|P77802|YAGX_ECOLI Uncharacterized protein YagX OS=Escherichia coli (strain K12) GN=yagX PE=4 SV=1
ko00010	Glycolysis / Gluconeogenesis	comp68387_c0	ctr-miR164_R-1	sp|P77748|YDIJ_ECOLI Uncharacterized protein YdiJ OS=Escherichia coli (strain K12) GN=ydiJ PE=4 SV=1
ko00010	Glycolysis / Gluconeogenesis	comp62562_c0	ctr-miR164_R-1	sp|B7MNB1|OPGB_ECO45 Phosphoglycerol transferase I OS=Escherichia coli O45:K1 (strain S88 / ExPEC) GN=mdoB PE=3 SV=1
ko00010	Glycolysis / Gluconeogenesis	comp60285_c0	ctr-miR164_R-1	sp|Q9ZW34|ENO3_ARATH Cytosolic enolase 3 OS=Arabidopsis thaliana GN=ENO3 PE=2 SV=1
ko00010	Glycolysis / Gluconeogenesis	comp648186_c0	ctr-miR164_R-1	sp|A1JHY1|GPMI_YERE8 2,3-bisphosphoglycerate-independent phosphoglycerate mutase OS=Yersinia enterocolitica serotype O:8 / biotype 1B (strain 8081) GN=gpmI PE=3 SV=1
ko00010	Glycolysis / Gluconeogenesis	comp59215_c0	ctr-miR164_R-1	sp|Q42954|KPYC_TOBAC Pyruvate kinase, cytosolic isozyme OS=Nicotiana tabacum PE=2 SV=1
ko00010	Glycolysis / Gluconeogenesis	comp68413_c0	csi-miR166e-5p_L-1R+1_1ss21GA	sp|P14294|TOP3_ECOLI DNA topoisomerase 3 OS=Escherichia coli (strain K12) GN=topB PE=1 SV=1
ko00010	Glycolysis / Gluconeogenesis	comp68457_c0	csi-miR166e-5p_L-1R+1_1ss21GA	sp|P77802|YAGX_ECOLI Uncharacterized protein YagX OS=Escherichia coli (strain K12) GN=yagX PE=4 SV=1
ko00010	Glycolysis / Gluconeogenesis	comp68319_c0	bna-miR168a	sp|P77802|YAGX_ECOLI Uncharacterized protein YagX OS=Escherichia coli (strain K12) GN=yagX PE=4 SV=1
ko00010	Glycolysis / Gluconeogenesis	comp62562_c0	bna-miR168a	sp|B7MNB1|OPGB_ECO45 Phosphoglycerol transferase I OS=Escherichia coli O45:K1 (strain S88 / ExPEC) GN=mdoB PE=3 SV=1
ko00010	Glycolysis / Gluconeogenesis	comp64825_c1	bna-miR168a	sp|P48977|ADH_MALDO Alcohol dehydrogenase OS=Malus domestica GN=ADH PE=2 SV=1
ko00010	Glycolysis / Gluconeogenesis	comp68387_c0	bna-miR168a	sp|P77748|YDIJ_ECOLI Uncharacterized protein YdiJ OS=Escherichia coli (strain K12) GN=ydiJ PE=4 SV=1
ko00010	Glycolysis / Gluconeogenesis	comp68419_c0	gma-MIR828a-p3_2ss3AC18CA	sp|P52647|NIFJ_ECOLI Probable pyruvate-flavodoxin oxidoreductase OS=Escherichia coli (strain K12) GN=ydbK PE=3 SV=2
ko00010	Glycolysis / Gluconeogenesis	comp68419_c0	gma-MIR828a-p3_2ss3AC18CA	sp|P52647|NIFJ_ECOLI Probable pyruvate-flavodoxin oxidoreductase OS=Escherichia coli (strain K12) GN=ydbK PE=3 SV=2
ko00010	Glycolysis / Gluconeogenesis	comp68419_c0	gma-MIR828a-p3_2ss3AC18CA	sp|P52647|NIFJ_ECOLI Probable pyruvate-flavodoxin oxidoreductase OS=Escherichia coli (strain K12) GN=ydbK PE=3 SV=2
ko00010	Glycolysis / Gluconeogenesis	comp68457_c0	gma-MIR828a-p3_2ss3AC18CA	sp|P77802|YAGX_ECOLI Uncharacterized protein YagX OS=Escherichia coli (strain K12) GN=yagX PE=4 SV=1
ko00010	Glycolysis / Gluconeogenesis	comp68457_c0	gma-MIR828a-p3_2ss3AC18CA	sp|P77802|YAGX_ECOLI Uncharacterized protein YagX OS=Escherichia coli (strain K12) GN=yagX PE=4 SV=1
ko00010	Glycolysis / Gluconeogenesis	comp52273_c0	gma-MIR828a-p3_2ss3AC18CA	sp|B7LAX0|G6PI_ECO55 Glucose-6-phosphate isomerase OS=Escherichia coli (strain 55989 / EAEC) GN=pgi PE=3 SV=1
ko00010	Glycolysis / Gluconeogenesis	comp52273_c0	gma-MIR828a-p3_2ss3AC18CA	sp|B7LAX0|G6PI_ECO55 Glucose-6-phosphate isomerase OS=Escherichia coli (strain 55989 / EAEC) GN=pgi PE=3 SV=1
ko00010	Glycolysis / Gluconeogenesis	comp68387_c0	gma-MIR828a-p3_2ss3AC18CA	sp|P77748|YDIJ_ECOLI Uncharacterized protein YdiJ OS=Escherichia coli (strain K12) GN=ydiJ PE=4 SV=1
ko00010	Glycolysis / Gluconeogenesis	comp65342_c0	gma-MIR828a-p3_2ss3AC18CA	sp|P42895|ENO2_MAIZE Enolase 2 OS=Zea mays GN=ENO2 PE=2 SV=1
ko00010	Glycolysis / Gluconeogenesis	comp62676_c0	gma-MIR828a-p3_2ss3AC18CA	sp|Q9C9C4|ENO1_ARATH Enolase 1, chloroplastic OS=Arabidopsis thaliana GN=ENO1 PE=1 SV=1
ko00010	Glycolysis / Gluconeogenesis	comp67196_c0	gma-MIR828a-p3_2ss3AC18CA	sp|Q9LEJ0|ENO1_HEVBR Enolase 1 OS=Hevea brasiliensis GN=ENO1 PE=1 SV=1
ko00010	Glycolysis / Gluconeogenesis	comp64928_c0	gma-MIR828a-p3_2ss3AC18CA	sp|B9DGD6|ACS_ARATH Acetate--CoA ligase ACS, chloroplastic/glyoxysomal OS=Arabidopsis thaliana GN=ACS PE=1 SV=1
ko00010	Glycolysis / Gluconeogenesis	comp163108_c0	gma-MIR828a-p3_2ss3AC18CA	sp|P29038|LDH_MAIZE L-lactate dehydrogenase OS=Zea mays PE=2 SV=1
ko00010	Glycolysis / Gluconeogenesis	comp26573_c0	gma-MIR828a-p3_2ss3AC18CA	sp|Q9SK86|ADHL1_ARATH Alcohol dehydrogenase-like 1 OS=Arabidopsis thaliana GN=At1g22430 PE=2 SV=1
ko00010	Glycolysis / Gluconeogenesis	comp68186_c0	gma-MIR828a-p3_2ss3AC18CA	sp|P65254|LLDP_ECO57 L-lactate permease OS=Escherichia coli O157:H7 GN=lldP PE=3 SV=1
ko00010	Glycolysis / Gluconeogenesis	comp68186_c0	gma-MIR828a-p3_2ss3AC18CA	sp|P65254|LLDP_ECO57 L-lactate permease OS=Escherichia coli O157:H7 GN=lldP PE=3 SV=1
ko00010	Glycolysis / Gluconeogenesis	comp68413_c0	gma-MIR828a-p3_2ss3AC18CA	sp|P14294|TOP3_ECOLI DNA topoisomerase 3 OS=Escherichia coli (strain K12) GN=topB PE=1 SV=1
ko00010	Glycolysis / Gluconeogenesis	comp36715_c0	gma-MIR828a-p3_2ss3AC18CA	sp|Q8S528|AL2B7_ARATH Aldehyde dehydrogenase family 2 member B7, mitochondrial OS=Arabidopsis thaliana GN=ALDH2B7 PE=2 SV=2
ko00010	Glycolysis / Gluconeogenesis	comp68063_c0	gma-MIR828a-p3_2ss3AC18CA	sp|Q46811|YGFK_ECOLI Uncharacterized protein YgfK OS=Escherichia coli (strain K12) GN=ygfK PE=4 SV=1
ko00010	Glycolysis / Gluconeogenesis	comp67925_c0	gma-MIR828a-p3_2ss3AC18CA	sp|Q8BMF4|ODP2_MOUSE Dihydrolipoyllysine-residue acetyltransferase component of pyruvate dehydrogenase complex, mitochondrial OS=Mus musculus GN=Dlat PE=1 SV=2
ko00010	Glycolysis / Gluconeogenesis	comp67979_c0	gma-MIR828a-p3_2ss3AC18CA	sp|P0AEC7|BARA_ECO57 Signal transduction histidine-protein kinase BarA OS=Escherichia coli O157:H7 GN=barA PE=3 SV=1
ko00010	Glycolysis / Gluconeogenesis	comp64577_c0	gma-MIR828a-p3_2ss3AC18CA	sp|P0ABD0|BETT_ECO57 High-affinity choline transport protein OS=Escherichia coli O157:H7 GN=betT PE=3 SV=1
ko00010	Glycolysis / Gluconeogenesis	comp64577_c0	gma-MIR828a-p3_2ss3AC18CA	sp|P0ABD0|BETT_ECO57 High-affinity choline transport protein OS=Escherichia coli O157:H7 GN=betT PE=3 SV=1
ko00010	Glycolysis / Gluconeogenesis	comp67999_c0	gma-MIR828a-p3_2ss3AC18CA	sp|P77748|YDIJ_ECOLI Uncharacterized protein YdiJ OS=Escherichia coli (strain K12) GN=ydiJ PE=4 SV=1
ko00010	Glycolysis / Gluconeogenesis	comp59974_c0	gma-MIR828a-p3_2ss3AC18CA	sp|Q42525|HXK1_ARATH Hexokinase-1 OS=Arabidopsis thaliana GN=HXK1 PE=1 SV=2
ko00010	Glycolysis / Gluconeogenesis	comp61003_c0	gma-MIR828a-p3_2ss3AC18CA	sp|P22988|LDHA_HORVU L-lactate dehydrogenase A OS=Hordeum vulgare PE=1 SV=1
ko00010	Glycolysis / Gluconeogenesis	comp56483_c0	gma-MIR828a-p3_2ss3AC18CA	sp|Q6BEX0|YTFR_ECOLI Uncharacterized ABC transporter ATP-binding protein YtfR OS=Escherichia coli (strain K12) GN=ytfR PE=3 SV=1
ko00010	Glycolysis / Gluconeogenesis	comp68387_c0	gma-miR394a-5p_R+1_1ss18TA	sp|P77748|YDIJ_ECOLI Uncharacterized protein YdiJ OS=Escherichia coli (strain K12) GN=ydiJ PE=4 SV=1
ko00010	Glycolysis / Gluconeogenesis	comp67979_c0	gma-miR394a-5p_R+1_1ss18TA	sp|P0AEC7|BARA_ECO57 Signal transduction histidine-protein kinase BarA OS=Escherichia coli O157:H7 GN=barA PE=3 SV=1
ko00010	Glycolysis / Gluconeogenesis	comp68419_c0	mtr-MIR2592bj-p3_2ss12TC19AT_2	sp|P52647|NIFJ_ECOLI Probable pyruvate-flavodoxin oxidoreductase OS=Escherichia coli (strain K12) GN=ydbK PE=3 SV=2
ko00010	Glycolysis / Gluconeogenesis	comp67844_c0	mtr-MIR2592bj-p3_2ss12TC19AT_2	sp|Q94AA4|K6PF3_ARATH 6-phosphofructokinase 3 OS=Arabidopsis thaliana GN=PFK3 PE=1 SV=1
ko00010	Glycolysis / Gluconeogenesis	comp60889_c0	hbr-miR398_2ss9CT21GC	sp|P46275|F16P1_PEA Fructose-1,6-bisphosphatase, chloroplastic OS=Pisum sativum GN=FBP PE=1 SV=2
ko00010	Glycolysis / Gluconeogenesis	comp68419_c0	hbr-miR398_2ss9CT21GC	sp|P52647|NIFJ_ECOLI Probable pyruvate-flavodoxin oxidoreductase OS=Escherichia coli (strain K12) GN=ydbK PE=3 SV=2
ko00010	Glycolysis / Gluconeogenesis	comp68044_c0	hbr-miR398_2ss9CT21GC	sp|Q9XE58|SCL14_ARATH Scarecrow-like protein 14 OS=Arabidopsis thaliana GN=SCL14 PE=2 SV=2
ko00010	Glycolysis / Gluconeogenesis	comp68419_c0	ath-miR858b	sp|P52647|NIFJ_ECOLI Probable pyruvate-flavodoxin oxidoreductase OS=Escherichia coli (strain K12) GN=ydbK PE=3 SV=2
ko00010	Glycolysis / Gluconeogenesis	comp68319_c0	ath-miR858b	sp|P77802|YAGX_ECOLI Uncharacterized protein YagX OS=Escherichia coli (strain K12) GN=yagX PE=4 SV=1
ko00010	Glycolysis / Gluconeogenesis	comp68413_c0	ath-miR858b	sp|P14294|TOP3_ECOLI DNA topoisomerase 3 OS=Escherichia coli (strain K12) GN=topB PE=1 SV=1
ko00010	Glycolysis / Gluconeogenesis	comp65052_c0	rgl-miR5139_L-1	sp|Q94AA4|K6PF3_ARATH 6-phosphofructokinase 3 OS=Arabidopsis thaliana GN=PFK3 PE=1 SV=1
ko00010	Glycolysis / Gluconeogenesis	comp43617_c0	rgl-miR5139_L-1	sp|A7ZIA4|FRMA_ECO24 S-(hydroxymethyl)glutathione dehydrogenase OS=Escherichia coli O139:H28 (strain E24377A / ETEC) GN=frmA PE=3 SV=1
ko00010	Glycolysis / Gluconeogenesis	comp68387_c0	rgl-miR5139_L-1	sp|P77748|YDIJ_ECOLI Uncharacterized protein YdiJ OS=Escherichia coli (strain K12) GN=ydiJ PE=4 SV=1
ko00010	Glycolysis / Gluconeogenesis	comp45563_c0	rgl-miR5139_L-1	sp|O57742|APGM_PYRHO 2,3-bisphosphoglycerate-independent phosphoglycerate mutase OS=Pyrococcus horikoshii (strain ATCC 700860 / DSM 12428 / JCM 9974 / NBRC 100139 / OT-3) GN=apgM PE=1 SV=1
ko00010	Glycolysis / Gluconeogenesis	comp672577_c0	rgl-miR5139_L-1	sp|A4W5X6|F16PA_ENT38 Fructose-1,6-bisphosphatase class 1 OS=Enterobacter sp. (strain 638) GN=fbp PE=3 SV=1
ko00010	Glycolysis / Gluconeogenesis	comp53573_c0	rgl-miR5139_L-1	sp|P48494|TPIS_ORYSJ Triosephosphate isomerase, cytosolic OS=Oryza sativa subsp. japonica GN=TPI PE=1 SV=3
ko00010	Glycolysis / Gluconeogenesis	comp62750_c0	rgl-miR5139_L-1	sp|Q43117|KPYA_RICCO Pyruvate kinase isozyme A, chloroplastic OS=Ricinus communis PE=1 SV=1
ko00010	Glycolysis / Gluconeogenesis	comp68549_c0	rgl-miR5139_L-1	sp|P14294|TOP3_ECOLI DNA topoisomerase 3 OS=Escherichia coli (strain K12) GN=topB PE=1 SV=1
ko00010	Glycolysis / Gluconeogenesis	comp68413_c0	rgl-miR5139_L-1	sp|P14294|TOP3_ECOLI DNA topoisomerase 3 OS=Escherichia coli (strain K12) GN=topB PE=1 SV=1
ko00010	Glycolysis / Gluconeogenesis	comp68370_c0	rgl-miR5139_L-1	sp|O64688|ODPB3_ARATH Pyruvate dehydrogenase E1 component subunit beta-3, chloroplastic OS=Arabidopsis thaliana GN=E1-BETA-2 PE=2 SV=1
ko00010	Glycolysis / Gluconeogenesis	comp62562_c0	rgl-miR5139_L-1	sp|B7MNB1|OPGB_ECO45 Phosphoglycerol transferase I OS=Escherichia coli O45:K1 (strain S88 / ExPEC) GN=mdoB PE=3 SV=1
ko00010	Glycolysis / Gluconeogenesis	comp67979_c0	rgl-miR5139_L-1	sp|P0AEC7|BARA_ECO57 Signal transduction histidine-protein kinase BarA OS=Escherichia coli O157:H7 GN=barA PE=3 SV=1
ko00010	Glycolysis / Gluconeogenesis	comp59847_c0	rgl-miR5139_L-1	sp|Q6Z1G7|ODPB1_ORYSJ Pyruvate dehydrogenase E1 component subunit beta-1, mitochondrial OS=Oryza sativa subsp. japonica GN=Os08g0536000 PE=2 SV=1
ko00010	Glycolysis / Gluconeogenesis	comp54469_c0	rgl-miR5139_L-1	sp|Q9SM59|PGMP_PEA Phosphoglucomutase, chloroplastic OS=Pisum sativum GN=PGMP PE=1 SV=1
ko00010	Glycolysis / Gluconeogenesis	comp65561_c0	rgl-miR5139_L-1	sp|O24457|ODPA3_ARATH Pyruvate dehydrogenase E1 component subunit alpha-3, chloroplastic OS=Arabidopsis thaliana GN=PDH-E1 ALPHA PE=1 SV=1
ko00010	Glycolysis / Gluconeogenesis	comp60238_c0	ath-MIR5645e-p3_2ss18TG20TG_1	sp|Q9M5K3|DLDH1_ARATH Dihydrolipoyl dehydrogenase 1, mitochondrial OS=Arabidopsis thaliana GN=LPD1 PE=1 SV=2
ko00010	Glycolysis / Gluconeogenesis	comp68085_c0	ath-MIR5645e-p3_2ss18TG20TG_1	sp|Q9LPS1|HXK3_ARATH Hexokinase-3 OS=Arabidopsis thaliana GN=At1g50460 PE=1 SV=1
ko00010	Glycolysis / Gluconeogenesis	comp68063_c0	ath-MIR5645e-p3_2ss18TG20TG_1	sp|Q46811|YGFK_ECOLI Uncharacterized protein YgfK OS=Escherichia coli (strain K12) GN=ygfK PE=4 SV=1
ko00010	Glycolysis / Gluconeogenesis	comp68529_c0	ath-MIR5645e-p3_2ss18TG20TG_1	sp|P43329|HRPA_ECOLI ATP-dependent RNA helicase HrpA OS=Escherichia coli (strain K12) GN=hrpA PE=3 SV=3
ko00010	Glycolysis / Gluconeogenesis	comp68387_c0	ath-MIR5645e-p3_2ss18TG20TG_1	sp|P77748|YDIJ_ECOLI Uncharacterized protein YdiJ OS=Escherichia coli (strain K12) GN=ydiJ PE=4 SV=1
ko00010	Glycolysis / Gluconeogenesis	comp68457_c0	gma-miR408a-3p_L-1R+1	sp|P77802|YAGX_ECOLI Uncharacterized protein YagX OS=Escherichia coli (strain K12) GN=yagX PE=4 SV=1
ko00010	Glycolysis / Gluconeogenesis	comp68413_c0	ghr-MIR7499-p3_2ss10GC17CG	sp|P14294|TOP3_ECOLI DNA topoisomerase 3 OS=Escherichia coli (strain K12) GN=topB PE=1 SV=1
ko00010	Glycolysis / Gluconeogenesis	comp64577_c0	ghr-MIR7499-p3_2ss10GC17CG	sp|P0ABD0|BETT_ECO57 High-affinity choline transport protein OS=Escherichia coli O157:H7 GN=betT PE=3 SV=1
ko00010	Glycolysis / Gluconeogenesis	comp54932_c0	ghr-MIR7499-p3_2ss10GC17CG	sp|Q9FIK0|K6PF2_ARATH 6-phosphofructokinase 2 OS=Arabidopsis thaliana GN=PFK2 PE=1 SV=1
ko00010	Glycolysis / Gluconeogenesis	comp58812_c0	ghr-MIR7499-p3_2ss10GC17CG	sp|P30864|YAFC_ECOLI Uncharacterized HTH-type transcriptional regulator YafC OS=Escherichia coli (strain K12) GN=yafC PE=4 SV=1
ko00010	Glycolysis / Gluconeogenesis	comp68457_c0	ptc-miR6478_R+2_1ss21GA	sp|P77802|YAGX_ECOLI Uncharacterized protein YagX OS=Escherichia coli (strain K12) GN=yagX PE=4 SV=1
ko00010	Glycolysis / Gluconeogenesis	comp54581_c0	col-miRn-5p-32910_149	-
ko00010	Glycolysis / Gluconeogenesis	comp68457_c0	col-miRn-5p-32910_149	sp|P77802|YAGX_ECOLI Uncharacterized protein YagX OS=Escherichia coli (strain K12) GN=yagX PE=4 SV=1
ko00010	Glycolysis / Gluconeogenesis	comp68387_c0	col-miRn-5p-32910_149	sp|P77748|YDIJ_ECOLI Uncharacterized protein YdiJ OS=Escherichia coli (strain K12) GN=ydiJ PE=4 SV=1
ko00010	Glycolysis / Gluconeogenesis	comp68424_c0	rco-MIR403a-p3_1ss2TG	sp|Q42806|KPYC_SOYBN Pyruvate kinase, cytosolic isozyme OS=Glycine max PE=1 SV=1
ko00010	Glycolysis / Gluconeogenesis	comp42465_c0	rco-MIR403a-p3_1ss2TG	sp|Q0WQF7|OPD21_ARATH Dihydrolipoyllysine-residue acetyltransferase component 1 of pyruvate dehydrogenase complex, mitochondrial OS=Arabidopsis thaliana GN=LTA3 PE=1 SV=2
ko00010	Glycolysis / Gluconeogenesis	comp59611_c0	aly-MIR472-p3_2ss6TG18AG	sp|P27550|ACSA_ECOLI Acetyl-coenzyme A synthetase OS=Escherichia coli (strain K12) GN=acs PE=1 SV=2
ko00010	Glycolysis / Gluconeogenesis	comp67999_c0	bol-miR398a-3p	sp|P77748|YDIJ_ECOLI Uncharacterized protein YdiJ OS=Escherichia coli (strain K12) GN=ydiJ PE=4 SV=1
ko00010	Glycolysis / Gluconeogenesis	comp60238_c0	ath-MIR5645b-p3_2ss19TG21TC	sp|Q9M5K3|DLDH1_ARATH Dihydrolipoyl dehydrogenase 1, mitochondrial OS=Arabidopsis thaliana GN=LPD1 PE=1 SV=2
ko00010	Glycolysis / Gluconeogenesis	comp67196_c0	stu-miR482a-5p_2ss3AG12AC	sp|Q9LEJ0|ENO1_HEVBR Enolase 1 OS=Hevea brasiliensis GN=ENO1 PE=1 SV=1
ko00010	Glycolysis / Gluconeogenesis	comp68387_c0	stu-miR482a-5p_2ss3AG12AC	sp|P77748|YDIJ_ECOLI Uncharacterized protein YdiJ OS=Escherichia coli (strain K12) GN=ydiJ PE=4 SV=1
ko00010	Glycolysis / Gluconeogenesis	comp68419_c0	cpa-miR160c-3p	sp|P52647|NIFJ_ECOLI Probable pyruvate-flavodoxin oxidoreductase OS=Escherichia coli (strain K12) GN=ydbK PE=3 SV=2
ko00010	Glycolysis / Gluconeogenesis	comp68319_c0	vun-miR169	sp|P77802|YAGX_ECOLI Uncharacterized protein YagX OS=Escherichia coli (strain K12) GN=yagX PE=4 SV=1
ko00010	Glycolysis / Gluconeogenesis	comp68457_c0	csi-miR166e-5p	sp|P77802|YAGX_ECOLI Uncharacterized protein YagX OS=Escherichia coli (strain K12) GN=yagX PE=4 SV=1
ko00010	Glycolysis / Gluconeogenesis	comp68419_c0	csi-miR166e-5p	sp|P52647|NIFJ_ECOLI Probable pyruvate-flavodoxin oxidoreductase OS=Escherichia coli (strain K12) GN=ydbK PE=3 SV=2
ko00010	Glycolysis / Gluconeogenesis	comp68413_c0	csi-miR166e-5p	sp|P14294|TOP3_ECOLI DNA topoisomerase 3 OS=Escherichia coli (strain K12) GN=topB PE=1 SV=1
ko00010	Glycolysis / Gluconeogenesis	comp68529_c0	csi-miR166e-5p	sp|P43329|HRPA_ECOLI ATP-dependent RNA helicase HrpA OS=Escherichia coli (strain K12) GN=hrpA PE=3 SV=3
ko00010	Glycolysis / Gluconeogenesis	comp68063_c0	ssl-miR394	sp|Q46811|YGFK_ECOLI Uncharacterized protein YgfK OS=Escherichia coli (strain K12) GN=ygfK PE=4 SV=1
ko00010	Glycolysis / Gluconeogenesis	comp67443_c0	ssl-miR394	sp|Q39769|G3PC_GINBI Glyceraldehyde-3-phosphate dehydrogenase, cytosolic OS=Ginkgo biloba PE=2 SV=1
ko00010	Glycolysis / Gluconeogenesis	comp68085_c0	ath-MIR5645b-p3_2ss19TG22CA	sp|Q9LPS1|HXK3_ARATH Hexokinase-3 OS=Arabidopsis thaliana GN=At1g50460 PE=1 SV=1
ko00010	Glycolysis / Gluconeogenesis	comp68424_c0	rco-MIR403a-p5_1ss2TG	sp|Q42806|KPYC_SOYBN Pyruvate kinase, cytosolic isozyme OS=Glycine max PE=1 SV=1
ko00010	Glycolysis / Gluconeogenesis	comp42465_c0	rco-MIR403a-p5_1ss2TG	sp|Q0WQF7|OPD21_ARATH Dihydrolipoyllysine-residue acetyltransferase component 1 of pyruvate dehydrogenase complex, mitochondrial OS=Arabidopsis thaliana GN=LTA3 PE=1 SV=2
ko00010	Glycolysis / Gluconeogenesis	comp68413_c0	aly-miR171c-5p_2ss1AG21CA	sp|P14294|TOP3_ECOLI DNA topoisomerase 3 OS=Escherichia coli (strain K12) GN=topB PE=1 SV=1
ko00010	Glycolysis / Gluconeogenesis	comp68186_c0	aly-miR171c-5p_2ss1AG21CA	sp|P65254|LLDP_ECO57 L-lactate permease OS=Escherichia coli O157:H7 GN=lldP PE=3 SV=1
ko00010	Glycolysis / Gluconeogenesis	comp68319_c0	aly-miR171c-5p_2ss1AG21CA	sp|P77802|YAGX_ECOLI Uncharacterized protein YagX OS=Escherichia coli (strain K12) GN=yagX PE=4 SV=1
ko00010	Glycolysis / Gluconeogenesis	comp68063_c0	aly-miR171c-5p_2ss1AG21CA	sp|Q46811|YGFK_ECOLI Uncharacterized protein YgfK OS=Escherichia coli (strain K12) GN=ygfK PE=4 SV=1
ko00010	Glycolysis / Gluconeogenesis	comp68529_c0	aly-miR166g-5p_2ss10TG20GT	sp|P43329|HRPA_ECOLI ATP-dependent RNA helicase HrpA OS=Escherichia coli (strain K12) GN=hrpA PE=3 SV=3
ko00010	Glycolysis / Gluconeogenesis	comp60889_c0	aly-miR166g-5p_2ss10TG20GT	sp|P46275|F16P1_PEA Fructose-1,6-bisphosphatase, chloroplastic OS=Pisum sativum GN=FBP PE=1 SV=2
ko00010	Glycolysis / Gluconeogenesis	comp68457_c0	aly-miR166g-5p_2ss10TG20GT	sp|P77802|YAGX_ECOLI Uncharacterized protein YagX OS=Escherichia coli (strain K12) GN=yagX PE=4 SV=1
ko00010	Glycolysis / Gluconeogenesis	comp67999_c0	aly-miR166g-5p_2ss10TG20GT	sp|P77748|YDIJ_ECOLI Uncharacterized protein YdiJ OS=Escherichia coli (strain K12) GN=ydiJ PE=4 SV=1
ko00010	Glycolysis / Gluconeogenesis	comp68063_c0	htu-miR160a_R+1	sp|Q46811|YGFK_ECOLI Uncharacterized protein YgfK OS=Escherichia coli (strain K12) GN=ygfK PE=4 SV=1
ko00010	Glycolysis / Gluconeogenesis	comp68419_c0	htu-miR160a_R+1	sp|P52647|NIFJ_ECOLI Probable pyruvate-flavodoxin oxidoreductase OS=Escherichia coli (strain K12) GN=ydbK PE=3 SV=2
ko00010	Glycolysis / Gluconeogenesis	comp63382_c0	tcc-miR403a	sp|A1TC01|GPGP_MYCVP Glucosyl-3-phosphoglycerate phosphatase OS=Mycobacterium vanbaalenii (strain DSM 7251 / PYR-1) GN=gpgP PE=1 SV=1
ko00010	Glycolysis / Gluconeogenesis	comp68457_c0	dpr-miR408_L-1	sp|P77802|YAGX_ECOLI Uncharacterized protein YagX OS=Escherichia coli (strain K12) GN=yagX PE=4 SV=1
ko00010	Glycolysis / Gluconeogenesis	comp68387_c0	ptc-miR172b-5p	sp|P77748|YDIJ_ECOLI Uncharacterized protein YdiJ OS=Escherichia coli (strain K12) GN=ydiJ PE=4 SV=1
ko00010	Glycolysis / Gluconeogenesis	comp67021_c0	ptc-miR172b-5p	sp|Q43117|KPYA_RICCO Pyruvate kinase isozyme A, chloroplastic OS=Ricinus communis PE=1 SV=1
ko00010	Glycolysis / Gluconeogenesis	comp68419_c0	ptc-miR172b-5p	sp|P52647|NIFJ_ECOLI Probable pyruvate-flavodoxin oxidoreductase OS=Escherichia coli (strain K12) GN=ydbK PE=3 SV=2
ko00010	Glycolysis / Gluconeogenesis	comp68529_c0	ptc-miR172b-5p	sp|P43329|HRPA_ECOLI ATP-dependent RNA helicase HrpA OS=Escherichia coli (strain K12) GN=hrpA PE=3 SV=3
ko00010	Glycolysis / Gluconeogenesis	comp57370_c0	ptc-miR172b-5p	sp|Q42962|PGKY_TOBAC Phosphoglycerate kinase, cytosolic OS=Nicotiana tabacum PE=1 SV=1
ko00010	Glycolysis / Gluconeogenesis	comp60285_c0	ptc-miR172b-5p	sp|Q9ZW34|ENO3_ARATH Cytosolic enolase 3 OS=Arabidopsis thaliana GN=ENO3 PE=2 SV=1
ko00010	Glycolysis / Gluconeogenesis	comp68413_c0	aqc-miR399	sp|P14294|TOP3_ECOLI DNA topoisomerase 3 OS=Escherichia coli (strain K12) GN=topB PE=1 SV=1
ko00010	Glycolysis / Gluconeogenesis	comp63126_c0	ssl-miR397_1ss2CA	sp|Q6Z1G7|ODPB1_ORYSJ Pyruvate dehydrogenase E1 component subunit beta-1, mitochondrial OS=Oryza sativa subsp. japonica GN=Os08g0536000 PE=2 SV=1
ko00010	Glycolysis / Gluconeogenesis	comp68549_c0	ssl-miR397_1ss2CA	sp|P14294|TOP3_ECOLI DNA topoisomerase 3 OS=Escherichia coli (strain K12) GN=topB PE=1 SV=1
ko00010	Glycolysis / Gluconeogenesis	comp43617_c0	ssl-miR397_1ss2CA	sp|A7ZIA4|FRMA_ECO24 S-(hydroxymethyl)glutathione dehydrogenase OS=Escherichia coli O139:H28 (strain E24377A / ETEC) GN=frmA PE=3 SV=1
ko00010	Glycolysis / Gluconeogenesis	comp68186_c0	ssl-miR397_1ss2CA	sp|P65254|LLDP_ECO57 L-lactate permease OS=Escherichia coli O157:H7 GN=lldP PE=3 SV=1
ko00010	Glycolysis / Gluconeogenesis	comp47592_c0	ssl-miR397_1ss2CA	sp|P26519|G3PC_PETCR Glyceraldehyde-3-phosphate dehydrogenase, cytosolic OS=Petroselinum crispum GN=GAPC PE=2 SV=1
ko00010	Glycolysis / Gluconeogenesis	comp67196_c0	ssl-miR397_1ss2CA	sp|Q9LEJ0|ENO1_HEVBR Enolase 1 OS=Hevea brasiliensis GN=ENO1 PE=1 SV=1
ko00010	Glycolysis / Gluconeogenesis	comp65342_c0	ssl-miR828	sp|P42895|ENO2_MAIZE Enolase 2 OS=Zea mays GN=ENO2 PE=2 SV=1
ko00010	Glycolysis / Gluconeogenesis	comp33183_c0	aqc-miR172b_1ss21TG	sp|O24457|ODPA3_ARATH Pyruvate dehydrogenase E1 component subunit alpha-3, chloroplastic OS=Arabidopsis thaliana GN=PDH-E1 ALPHA PE=1 SV=1
ko00010	Glycolysis / Gluconeogenesis	comp68063_c0	aqc-miR172b_1ss21TG	sp|Q46811|YGFK_ECOLI Uncharacterized protein YgfK OS=Escherichia coli (strain K12) GN=ygfK PE=4 SV=1
ko00010	Glycolysis / Gluconeogenesis	comp54469_c0	ama-miR396-5p_1ss21TG	sp|Q9SM59|PGMP_PEA Phosphoglucomutase, chloroplastic OS=Pisum sativum GN=PGMP PE=1 SV=1
ko00010	Glycolysis / Gluconeogenesis	comp66899_c1	ama-miR396-5p_1ss21TG	sp|Q9SU63|AL2B4_ARATH Aldehyde dehydrogenase family 2 member B4, mitochondrial OS=Arabidopsis thaliana GN=ALDH2B4 PE=2 SV=1
ko00010	Glycolysis / Gluconeogenesis	comp68387_c0	ama-miR396-5p_1ss21TG	sp|P77748|YDIJ_ECOLI Uncharacterized protein YdiJ OS=Escherichia coli (strain K12) GN=ydiJ PE=4 SV=1
ko00010	Glycolysis / Gluconeogenesis	comp64966_c0	ama-miR396-5p_1ss21TG	sp|Q42908|PMGI_MESCR 2,3-bisphosphoglycerate-independent phosphoglycerate mutase OS=Mesembryanthemum crystallinum GN=PGM1 PE=1 SV=1
ko00010	Glycolysis / Gluconeogenesis	comp67999_c0	ama-miR396-5p_1ss21TG	sp|P77748|YDIJ_ECOLI Uncharacterized protein YdiJ OS=Escherichia coli (strain K12) GN=ydiJ PE=4 SV=1
ko00010	Glycolysis / Gluconeogenesis	comp63729_c0	ama-miR396-5p_1ss21TG	sp|Q0PGJ6|AKRC9_ARATH Aldo-keto reductase family 4 member C9 OS=Arabidopsis thaliana GN=AKR4C9 PE=1 SV=1
ko00010	Glycolysis / Gluconeogenesis	comp68186_c0	lja-miR167_R+1_1ss21GT	sp|P65254|LLDP_ECO57 L-lactate permease OS=Escherichia coli O157:H7 GN=lldP PE=3 SV=1
ko00010	Glycolysis / Gluconeogenesis	comp68085_c0	col-miRn-3p-23356_203	sp|Q9LPS1|HXK3_ARATH Hexokinase-3 OS=Arabidopsis thaliana GN=At1g50460 PE=1 SV=1
ko00010	Glycolysis / Gluconeogenesis	comp68319_c0	lja-miR390a-3p_1ss8CT	sp|P77802|YAGX_ECOLI Uncharacterized protein YagX OS=Escherichia coli (strain K12) GN=yagX PE=4 SV=1
ko00010	Glycolysis / Gluconeogenesis	comp68319_c0	lja-miR390a-3p_1ss8CT	sp|P77802|YAGX_ECOLI Uncharacterized protein YagX OS=Escherichia coli (strain K12) GN=yagX PE=4 SV=1
ko00010	Glycolysis / Gluconeogenesis	comp68063_c0	lja-miR390a-3p_1ss8CT	sp|Q46811|YGFK_ECOLI Uncharacterized protein YgfK OS=Escherichia coli (strain K12) GN=ygfK PE=4 SV=1
ko00010	Glycolysis / Gluconeogenesis	comp68186_c0	lja-miR390a-3p_1ss8CT	sp|P65254|LLDP_ECO57 L-lactate permease OS=Escherichia coli O157:H7 GN=lldP PE=3 SV=1
ko00010	Glycolysis / Gluconeogenesis	comp67979_c0	lus-MIR156a-p3_1ss21CT	sp|P0AEC7|BARA_ECO57 Signal transduction histidine-protein kinase BarA OS=Escherichia coli O157:H7 GN=barA PE=3 SV=1
ko00010	Glycolysis / Gluconeogenesis	comp68413_c0	lus-MIR156a-p3_1ss21CT	sp|P14294|TOP3_ECOLI DNA topoisomerase 3 OS=Escherichia coli (strain K12) GN=topB PE=1 SV=1
ko00010	Glycolysis / Gluconeogenesis	comp68457_c0	lus-MIR156a-p3_1ss21CT	sp|P77802|YAGX_ECOLI Uncharacterized protein YagX OS=Escherichia coli (strain K12) GN=yagX PE=4 SV=1
ko00010	Glycolysis / Gluconeogenesis	comp46758_c0	lus-MIR156a-p3_1ss21CT	-
ko00010	Glycolysis / Gluconeogenesis	comp68549_c0	rco-miR156e_L+1R-1	sp|P14294|TOP3_ECOLI DNA topoisomerase 3 OS=Escherichia coli (strain K12) GN=topB PE=1 SV=1
ko00010	Glycolysis / Gluconeogenesis	comp68063_c0	rco-miR156e_L+1R-1	sp|Q46811|YGFK_ECOLI Uncharacterized protein YgfK OS=Escherichia coli (strain K12) GN=ygfK PE=4 SV=1
ko00010	Glycolysis / Gluconeogenesis	comp68457_c0	gra-miR167a_L-2R+2	sp|P77802|YAGX_ECOLI Uncharacterized protein YagX OS=Escherichia coli (strain K12) GN=yagX PE=4 SV=1
ko00010	Glycolysis / Gluconeogenesis	comp68457_c0	gra-miR167a_L-2R+2	sp|P77802|YAGX_ECOLI Uncharacterized protein YagX OS=Escherichia coli (strain K12) GN=yagX PE=4 SV=1
ko00010	Glycolysis / Gluconeogenesis	comp68457_c0	gra-miR167a_L-2R+2	sp|P77802|YAGX_ECOLI Uncharacterized protein YagX OS=Escherichia coli (strain K12) GN=yagX PE=4 SV=1
ko00010	Glycolysis / Gluconeogenesis	comp68156_c0	gra-miR167a_L-2R+2	sp|Q9ZSQ4|PGMC_POPTN Phosphoglucomutase, cytoplasmic OS=Populus tremula GN=PGM1 PE=2 SV=1
ko00010	Glycolysis / Gluconeogenesis	comp68387_c0	nta-MIR6149a-p5_2ss18CT21TA	sp|P77748|YDIJ_ECOLI Uncharacterized protein YdiJ OS=Escherichia coli (strain K12) GN=ydiJ PE=4 SV=1
ko00010	Glycolysis / Gluconeogenesis	comp68063_c0	nta-MIR6149a-p5_2ss18CT21TA	sp|Q46811|YGFK_ECOLI Uncharacterized protein YgfK OS=Escherichia coli (strain K12) GN=ygfK PE=4 SV=1
ko00010	Glycolysis / Gluconeogenesis	comp68063_c0	nta-MIR6149a-p5_2ss18CT21TA	sp|Q46811|YGFK_ECOLI Uncharacterized protein YgfK OS=Escherichia coli (strain K12) GN=ygfK PE=4 SV=1
ko00010	Glycolysis / Gluconeogenesis	comp54469_c0	amg-miR396	sp|Q9SM59|PGMP_PEA Phosphoglucomutase, chloroplastic OS=Pisum sativum GN=PGMP PE=1 SV=1
ko00010	Glycolysis / Gluconeogenesis	comp66899_c1	amg-miR396	sp|Q9SU63|AL2B4_ARATH Aldehyde dehydrogenase family 2 member B4, mitochondrial OS=Arabidopsis thaliana GN=ALDH2B4 PE=2 SV=1
ko00010	Glycolysis / Gluconeogenesis	comp68387_c0	amg-miR396	sp|P77748|YDIJ_ECOLI Uncharacterized protein YdiJ OS=Escherichia coli (strain K12) GN=ydiJ PE=4 SV=1
ko00010	Glycolysis / Gluconeogenesis	comp64966_c0	amg-miR396	sp|Q42908|PMGI_MESCR 2,3-bisphosphoglycerate-independent phosphoglycerate mutase OS=Mesembryanthemum crystallinum GN=PGM1 PE=1 SV=1
ko00010	Glycolysis / Gluconeogenesis	comp67999_c0	amg-miR396	sp|P77748|YDIJ_ECOLI Uncharacterized protein YdiJ OS=Escherichia coli (strain K12) GN=ydiJ PE=4 SV=1
ko00010	Glycolysis / Gluconeogenesis	comp63729_c0	amg-miR396	sp|Q0PGJ6|AKRC9_ARATH Aldo-keto reductase family 4 member C9 OS=Arabidopsis thaliana GN=AKR4C9 PE=1 SV=1
ko00010	Glycolysis / Gluconeogenesis	comp68419_c0	aly-miR171c-5p_1ss5AG	sp|P52647|NIFJ_ECOLI Probable pyruvate-flavodoxin oxidoreductase OS=Escherichia coli (strain K12) GN=ydbK PE=3 SV=2
ko00010	Glycolysis / Gluconeogenesis	comp67999_c0	aly-miR171c-5p_1ss5AG	sp|P77748|YDIJ_ECOLI Uncharacterized protein YdiJ OS=Escherichia coli (strain K12) GN=ydiJ PE=4 SV=1
ko00010	Glycolysis / Gluconeogenesis	comp68549_c0	cpa-miR164d	sp|P14294|TOP3_ECOLI DNA topoisomerase 3 OS=Escherichia coli (strain K12) GN=topB PE=1 SV=1
ko00010	Glycolysis / Gluconeogenesis	comp46758_c0	cpa-miR164d	-
ko00010	Glycolysis / Gluconeogenesis	comp60238_c0	cpa-miR164d	sp|Q9M5K3|DLDH1_ARATH Dihydrolipoyl dehydrogenase 1, mitochondrial OS=Arabidopsis thaliana GN=LPD1 PE=1 SV=2
ko00010	Glycolysis / Gluconeogenesis	comp68413_c0	dpr-miR167a_L-2R+3	sp|P14294|TOP3_ECOLI DNA topoisomerase 3 OS=Escherichia coli (strain K12) GN=topB PE=1 SV=1
ko00010	Glycolysis / Gluconeogenesis	comp64577_c0	dpr-miR167a_L-2R+3	sp|P0ABD0|BETT_ECO57 High-affinity choline transport protein OS=Escherichia coli O157:H7 GN=betT PE=3 SV=1
ko00010	Glycolysis / Gluconeogenesis	comp52273_c0	dpr-miR167a_L-2R+3	sp|B7LAX0|G6PI_ECO55 Glucose-6-phosphate isomerase OS=Escherichia coli (strain 55989 / EAEC) GN=pgi PE=3 SV=1
ko00010	Glycolysis / Gluconeogenesis	comp67021_c0	hpe-miR166a	sp|Q43117|KPYA_RICCO Pyruvate kinase isozyme A, chloroplastic OS=Ricinus communis PE=1 SV=1
ko00010	Glycolysis / Gluconeogenesis	comp68413_c0	hpe-miR166a	sp|P14294|TOP3_ECOLI DNA topoisomerase 3 OS=Escherichia coli (strain K12) GN=topB PE=1 SV=1
ko00010	Glycolysis / Gluconeogenesis	comp68419_c0	lja-miR171c	sp|P52647|NIFJ_ECOLI Probable pyruvate-flavodoxin oxidoreductase OS=Escherichia coli (strain K12) GN=ydbK PE=3 SV=2
ko00010	Glycolysis / Gluconeogenesis	comp67999_c0	lja-miR171c	sp|P77748|YDIJ_ECOLI Uncharacterized protein YdiJ OS=Escherichia coli (strain K12) GN=ydiJ PE=4 SV=1
ko00010	Glycolysis / Gluconeogenesis	comp65875_c0	lja-miR171c	sp|Q9FLW9|PKP2_ARATH Plastidial pyruvate kinase 2 OS=Arabidopsis thaliana GN=PKP2 PE=1 SV=1
ko00010	Glycolysis / Gluconeogenesis	comp57370_c0	lja-miR171c	sp|Q42962|PGKY_TOBAC Phosphoglycerate kinase, cytosolic OS=Nicotiana tabacum PE=1 SV=1
ko00010	Glycolysis / Gluconeogenesis	comp67979_c0	gma-miR319a	sp|P0AEC7|BARA_ECO57 Signal transduction histidine-protein kinase BarA OS=Escherichia coli O157:H7 GN=barA PE=3 SV=1
ko00010	Glycolysis / Gluconeogenesis	comp68419_c0	gma-miR319a	sp|P52647|NIFJ_ECOLI Probable pyruvate-flavodoxin oxidoreductase OS=Escherichia coli (strain K12) GN=ydbK PE=3 SV=2
ko00010	Glycolysis / Gluconeogenesis	comp67708_c0	gma-miR319a	sp|Q9ZU52|ALFC3_ARATH Probable fructose-bisphosphate aldolase 3, chloroplastic OS=Arabidopsis thaliana GN=FBA3 PE=1 SV=1
ko00010	Glycolysis / Gluconeogenesis	comp68413_c0	col-miRn-3p-130934_29	sp|P14294|TOP3_ECOLI DNA topoisomerase 3 OS=Escherichia coli (strain K12) GN=topB PE=1 SV=1
ko00010	Glycolysis / Gluconeogenesis	comp67844_c0	ssl-miR171b_2ss11CT19AT	sp|Q94AA4|K6PF3_ARATH 6-phosphofructokinase 3 OS=Arabidopsis thaliana GN=PFK3 PE=1 SV=1
ko00010	Glycolysis / Gluconeogenesis	comp68319_c0	col-miRn-5p-46619_106	sp|P77802|YAGX_ECOLI Uncharacterized protein YagX OS=Escherichia coli (strain K12) GN=yagX PE=4 SV=1
ko00010	Glycolysis / Gluconeogenesis	comp60889_c0	col-miRn-5p-46619_106	sp|P46275|F16P1_PEA Fructose-1,6-bisphosphatase, chloroplastic OS=Pisum sativum GN=FBP PE=1 SV=2
ko00010	Glycolysis / Gluconeogenesis	comp68044_c0	col-miRn-5p-46619_106	sp|Q9XE58|SCL14_ARATH Scarecrow-like protein 14 OS=Arabidopsis thaliana GN=SCL14 PE=2 SV=2
ko00010	Glycolysis / Gluconeogenesis	comp68424_c0	mes-MIR477g-p5_1ss1CT	sp|Q42806|KPYC_SOYBN Pyruvate kinase, cytosolic isozyme OS=Glycine max PE=1 SV=1
ko00010	Glycolysis / Gluconeogenesis	comp68529_c0	ama-miR396-3p_L-2R+2	sp|P43329|HRPA_ECOLI ATP-dependent RNA helicase HrpA OS=Escherichia coli (strain K12) GN=hrpA PE=3 SV=3
ko00010	Glycolysis / Gluconeogenesis	comp42465_c0	ama-miR396-3p_L-2R+2	sp|Q0WQF7|OPD21_ARATH Dihydrolipoyllysine-residue acetyltransferase component 1 of pyruvate dehydrogenase complex, mitochondrial OS=Arabidopsis thaliana GN=LTA3 PE=1 SV=2
ko00010	Glycolysis / Gluconeogenesis	comp68156_c0	ahy-miR167-3p_2ss8GA15TC	sp|Q9ZSQ4|PGMC_POPTN Phosphoglucomutase, cytoplasmic OS=Populus tremula GN=PGM1 PE=2 SV=1
ko00010	Glycolysis / Gluconeogenesis	comp68419_c0	ahy-miR167-3p_2ss8GA15TC	sp|P52647|NIFJ_ECOLI Probable pyruvate-flavodoxin oxidoreductase OS=Escherichia coli (strain K12) GN=ydbK PE=3 SV=2
ko00010	Glycolysis / Gluconeogenesis	comp67979_c0	nta-miR172d	sp|P0AEC7|BARA_ECO57 Signal transduction histidine-protein kinase BarA OS=Escherichia coli O157:H7 GN=barA PE=3 SV=1
ko00010	Glycolysis / Gluconeogenesis	comp63301_c0	nta-miR172d	-
ko00010	Glycolysis / Gluconeogenesis	comp68319_c0	nta-miR172d	sp|P77802|YAGX_ECOLI Uncharacterized protein YagX OS=Escherichia coli (strain K12) GN=yagX PE=4 SV=1
ko00010	Glycolysis / Gluconeogenesis	comp67999_c0	ppe-miR172a-5p_1ss21GA	sp|P77748|YDIJ_ECOLI Uncharacterized protein YdiJ OS=Escherichia coli (strain K12) GN=ydiJ PE=4 SV=1
ko00010	Glycolysis / Gluconeogenesis	comp162409_c0	ppe-miR172a-5p_1ss21GA	sp|P35493|PMGI_RICCO 2,3-bisphosphoglycerate-independent phosphoglycerate mutase OS=Ricinus communis PE=1 SV=2
ko00010	Glycolysis / Gluconeogenesis	comp68044_c0	ppe-miR172a-5p_1ss21GA	sp|Q9XE58|SCL14_ARATH Scarecrow-like protein 14 OS=Arabidopsis thaliana GN=SCL14 PE=2 SV=2
ko00010	Glycolysis / Gluconeogenesis	comp68413_c0	ppe-miR172a-5p_1ss21GA	sp|P14294|TOP3_ECOLI DNA topoisomerase 3 OS=Escherichia coli (strain K12) GN=topB PE=1 SV=1
ko00010	Glycolysis / Gluconeogenesis	comp60788_c0	ppe-miR172a-5p_1ss21GA	sp|Q8K157|GALM_MOUSE Aldose 1-epimerase OS=Mus musculus GN=Galm PE=2 SV=1
ko00010	Glycolysis / Gluconeogenesis	comp57370_c0	ppe-miR172a-5p_1ss21GA	sp|Q42962|PGKY_TOBAC Phosphoglycerate kinase, cytosolic OS=Nicotiana tabacum PE=1 SV=1
ko00010	Glycolysis / Gluconeogenesis	comp64966_c0	ama-miR396-5p	sp|Q42908|PMGI_MESCR 2,3-bisphosphoglycerate-independent phosphoglycerate mutase OS=Mesembryanthemum crystallinum GN=PGM1 PE=1 SV=1
ko00010	Glycolysis / Gluconeogenesis	comp59974_c0	ama-miR396-5p	sp|Q42525|HXK1_ARATH Hexokinase-1 OS=Arabidopsis thaliana GN=HXK1 PE=1 SV=2
ko00010	Glycolysis / Gluconeogenesis	comp59974_c0	ama-miR396-5p	sp|Q42525|HXK1_ARATH Hexokinase-1 OS=Arabidopsis thaliana GN=HXK1 PE=1 SV=2
ko00010	Glycolysis / Gluconeogenesis	comp54469_c0	ama-miR396-5p	sp|Q9SM59|PGMP_PEA Phosphoglucomutase, chloroplastic OS=Pisum sativum GN=PGMP PE=1 SV=1
ko00010	Glycolysis / Gluconeogenesis	comp10358_c0	ama-miR396-5p	sp|O24457|ODPA3_ARATH Pyruvate dehydrogenase E1 component subunit alpha-3, chloroplastic OS=Arabidopsis thaliana GN=PDH-E1 ALPHA PE=1 SV=1
ko00010	Glycolysis / Gluconeogenesis	comp67999_c0	cpa-miR164a	sp|P77748|YDIJ_ECOLI Uncharacterized protein YdiJ OS=Escherichia coli (strain K12) GN=ydiJ PE=4 SV=1
ko00010	Glycolysis / Gluconeogenesis	comp64966_c0	cpa-miR164a	sp|Q42908|PMGI_MESCR 2,3-bisphosphoglycerate-independent phosphoglycerate mutase OS=Mesembryanthemum crystallinum GN=PGM1 PE=1 SV=1
ko00010	Glycolysis / Gluconeogenesis	comp68419_c0	cpa-miR164a	sp|P52647|NIFJ_ECOLI Probable pyruvate-flavodoxin oxidoreductase OS=Escherichia coli (strain K12) GN=ydbK PE=3 SV=2
ko00010	Glycolysis / Gluconeogenesis	comp62562_c0	cpa-miR164a	sp|B7MNB1|OPGB_ECO45 Phosphoglycerol transferase I OS=Escherichia coli O45:K1 (strain S88 / ExPEC) GN=mdoB PE=3 SV=1
ko00010	Glycolysis / Gluconeogenesis	comp68549_c0	cpa-miR164a	sp|P14294|TOP3_ECOLI DNA topoisomerase 3 OS=Escherichia coli (strain K12) GN=topB PE=1 SV=1
ko00010	Glycolysis / Gluconeogenesis	comp68529_c0	cpa-miR164a	sp|P43329|HRPA_ECOLI ATP-dependent RNA helicase HrpA OS=Escherichia coli (strain K12) GN=hrpA PE=3 SV=3
ko00010	Glycolysis / Gluconeogenesis	comp62515_c0	col-miRn-5p-17637_256	sp|Q70E96|AL3F1_ARATH Aldehyde dehydrogenase family 3 member F1 OS=Arabidopsis thaliana GN=ALDH3F1 PE=2 SV=2
ko00010	Glycolysis / Gluconeogenesis	comp68457_c0	aly-miR171b-3p_1ss19AG	sp|P77802|YAGX_ECOLI Uncharacterized protein YagX OS=Escherichia coli (strain K12) GN=yagX PE=4 SV=1
ko00010	Glycolysis / Gluconeogenesis	comp68529_c0	aly-miR171b-3p_1ss19AG	sp|P43329|HRPA_ECOLI ATP-dependent RNA helicase HrpA OS=Escherichia coli (strain K12) GN=hrpA PE=3 SV=3
ko00010	Glycolysis / Gluconeogenesis	comp68419_c0	aly-miR171b-3p_1ss19AG	sp|P52647|NIFJ_ECOLI Probable pyruvate-flavodoxin oxidoreductase OS=Escherichia coli (strain K12) GN=ydbK PE=3 SV=2
ko00010	Glycolysis / Gluconeogenesis	comp68413_c0	aly-miR171b-3p_1ss19AG	sp|P14294|TOP3_ECOLI DNA topoisomerase 3 OS=Escherichia coli (strain K12) GN=topB PE=1 SV=1
ko00010	Glycolysis / Gluconeogenesis	comp68413_c0	aqc-MIR172b-p3_1ss9TC	sp|P14294|TOP3_ECOLI DNA topoisomerase 3 OS=Escherichia coli (strain K12) GN=topB PE=1 SV=1
ko00010	Glycolysis / Gluconeogenesis	comp68413_c0	aqc-MIR172b-p3_1ss9TC	sp|P14294|TOP3_ECOLI DNA topoisomerase 3 OS=Escherichia coli (strain K12) GN=topB PE=1 SV=1
ko00010	Glycolysis / Gluconeogenesis	comp64577_c0	aqc-MIR172b-p3_1ss9TC	sp|P0ABD0|BETT_ECO57 High-affinity choline transport protein OS=Escherichia coli O157:H7 GN=betT PE=3 SV=1
ko00010	Glycolysis / Gluconeogenesis	comp68419_c0	lja-miR171d-3p	sp|P52647|NIFJ_ECOLI Probable pyruvate-flavodoxin oxidoreductase OS=Escherichia coli (strain K12) GN=ydbK PE=3 SV=2
ko00010	Glycolysis / Gluconeogenesis	comp68419_c0	lja-miR171d-3p	sp|P52647|NIFJ_ECOLI Probable pyruvate-flavodoxin oxidoreductase OS=Escherichia coli (strain K12) GN=ydbK PE=3 SV=2
ko00010	Glycolysis / Gluconeogenesis	comp65870_c0	lja-miR171d-3p	sp|Q0V7W6|ADHL5_ARATH Alcohol dehydrogenase-like 5 OS=Arabidopsis thaliana GN=At4g22110 PE=2 SV=1
ko00010	Glycolysis / Gluconeogenesis	comp68549_c0	lja-miR171d-3p	sp|P14294|TOP3_ECOLI DNA topoisomerase 3 OS=Escherichia coli (strain K12) GN=topB PE=1 SV=1
ko00010	Glycolysis / Gluconeogenesis	comp67999_c0	lja-miR171d-3p	sp|P77748|YDIJ_ECOLI Uncharacterized protein YdiJ OS=Escherichia coli (strain K12) GN=ydiJ PE=4 SV=1
ko00010	Glycolysis / Gluconeogenesis	comp27103_c0	lja-miR171d-3p	sp|Q9LPS1|HXK3_ARATH Hexokinase-3 OS=Arabidopsis thaliana GN=At1g50460 PE=1 SV=1
ko00010	Glycolysis / Gluconeogenesis	comp66899_c1	lja-miR171d-3p	sp|Q9SU63|AL2B4_ARATH Aldehyde dehydrogenase family 2 member B4, mitochondrial OS=Arabidopsis thaliana GN=ALDH2B4 PE=2 SV=1
ko00010	Glycolysis / Gluconeogenesis	comp68529_c0	cca-miR396a-3p_2ss7GT21AG	sp|P43329|HRPA_ECOLI ATP-dependent RNA helicase HrpA OS=Escherichia coli (strain K12) GN=hrpA PE=3 SV=3
ko00010	Glycolysis / Gluconeogenesis	comp68319_c0	cca-miR396a-3p_2ss7GT21AG	sp|P77802|YAGX_ECOLI Uncharacterized protein YagX OS=Escherichia coli (strain K12) GN=yagX PE=4 SV=1
ko00010	Glycolysis / Gluconeogenesis	comp67999_c0	hbr-MIR159b-p3_1ss20GA	sp|P77748|YDIJ_ECOLI Uncharacterized protein YdiJ OS=Escherichia coli (strain K12) GN=ydiJ PE=4 SV=1
ko00010	Glycolysis / Gluconeogenesis	comp49242_c0	mtr-MIR2592bj-p3_2ss12TC19AT_1	sp|Q8S528|AL2B7_ARATH Aldehyde dehydrogenase family 2 member B7, mitochondrial OS=Arabidopsis thaliana GN=ALDH2B7 PE=2 SV=2
ko00010	Glycolysis / Gluconeogenesis	comp68419_c0	mtr-MIR2592bj-p3_2ss12TC19AT_1	sp|P52647|NIFJ_ECOLI Probable pyruvate-flavodoxin oxidoreductase OS=Escherichia coli (strain K12) GN=ydbK PE=3 SV=2
ko00010	Glycolysis / Gluconeogenesis	comp67844_c0	mtr-MIR2592bj-p3_2ss12TC19AT_1	sp|Q94AA4|K6PF3_ARATH 6-phosphofructokinase 3 OS=Arabidopsis thaliana GN=PFK3 PE=1 SV=1
ko00010	Glycolysis / Gluconeogenesis	comp68085_c0	mtr-MIR2592bj-p3_2ss12TC19AT_1	sp|Q9LPS1|HXK3_ARATH Hexokinase-3 OS=Arabidopsis thaliana GN=At1g50460 PE=1 SV=1
ko00010	Glycolysis / Gluconeogenesis	comp26573_c0	mtr-MIR2592bj-p3_2ss12TC19AT_1	sp|Q9SK86|ADHL1_ARATH Alcohol dehydrogenase-like 1 OS=Arabidopsis thaliana GN=At1g22430 PE=2 SV=1
ko00010	Glycolysis / Gluconeogenesis	comp67979_c0	ath-miR172a	sp|P0AEC7|BARA_ECO57 Signal transduction histidine-protein kinase BarA OS=Escherichia coli O157:H7 GN=barA PE=3 SV=1
ko00010	Glycolysis / Gluconeogenesis	comp63301_c0	ath-miR172a	-
ko00010	Glycolysis / Gluconeogenesis	comp68319_c0	ath-miR172a	sp|P77802|YAGX_ECOLI Uncharacterized protein YagX OS=Escherichia coli (strain K12) GN=yagX PE=4 SV=1
ko00010	Glycolysis / Gluconeogenesis	comp44358_c0	ppe-miR535b	sp|P29038|LDH_MAIZE L-lactate dehydrogenase OS=Zea mays PE=2 SV=1
ko00010	Glycolysis / Gluconeogenesis	comp47701_c0	col-miRn-3p-150062_24	sp|P25851|F16P1_ARATH Fructose-1,6-bisphosphatase, chloroplastic OS=Arabidopsis thaliana GN=FBP PE=2 SV=2
ko00010	Glycolysis / Gluconeogenesis	comp60238_c0	ath-MIR5645b-p5_2ss19TG21TC	sp|Q9M5K3|DLDH1_ARATH Dihydrolipoyl dehydrogenase 1, mitochondrial OS=Arabidopsis thaliana GN=LPD1 PE=1 SV=2
ko00010	Glycolysis / Gluconeogenesis	comp67185_c0	gma-MIR5368-p3_1ss21CT	sp|P93338|GAPN_NICPL NADP-dependent glyceraldehyde-3-phosphate dehydrogenase OS=Nicotiana plumbaginifolia GN=GAPN PE=2 SV=1
ko00010	Glycolysis / Gluconeogenesis	comp65870_c0	gma-MIR5368-p3_1ss21CT	sp|Q0V7W6|ADHL5_ARATH Alcohol dehydrogenase-like 5 OS=Arabidopsis thaliana GN=At4g22110 PE=2 SV=1
ko00010	Glycolysis / Gluconeogenesis	comp65468_c0	gma-MIR5368-p3_1ss21CT	sp|Q8W4F0|DAR1_ARATH Protein DA1-related 1 OS=Arabidopsis thaliana GN=DAR1 PE=2 SV=3
ko00010	Glycolysis / Gluconeogenesis	comp64086_c0	gma-MIR5368-p3_1ss21CT	sp|P93338|GAPN_NICPL NADP-dependent glyceraldehyde-3-phosphate dehydrogenase OS=Nicotiana plumbaginifolia GN=GAPN PE=2 SV=1
ko00010	Glycolysis / Gluconeogenesis	comp68413_c0	ptc-miR1448_L+1R+1	sp|P14294|TOP3_ECOLI DNA topoisomerase 3 OS=Escherichia coli (strain K12) GN=topB PE=1 SV=1
ko00010	Glycolysis / Gluconeogenesis	comp62562_c0	ptc-miR1448_L+1R+1	sp|B7MNB1|OPGB_ECO45 Phosphoglycerol transferase I OS=Escherichia coli O45:K1 (strain S88 / ExPEC) GN=mdoB PE=3 SV=1
ko00010	Glycolysis / Gluconeogenesis	comp68319_c0	rco-miR167a_R+1	sp|P77802|YAGX_ECOLI Uncharacterized protein YagX OS=Escherichia coli (strain K12) GN=yagX PE=4 SV=1
ko00010	Glycolysis / Gluconeogenesis	comp52273_c0	rco-miR167a_R+1	sp|B7LAX0|G6PI_ECO55 Glucose-6-phosphate isomerase OS=Escherichia coli (strain 55989 / EAEC) GN=pgi PE=3 SV=1
ko00010	Glycolysis / Gluconeogenesis	comp68063_c0	ath-MIR5645e-p3_2ss18TG20TG_2	sp|Q46811|YGFK_ECOLI Uncharacterized protein YgfK OS=Escherichia coli (strain K12) GN=ygfK PE=4 SV=1
ko00010	Glycolysis / Gluconeogenesis	comp68085_c0	ath-MIR5645e-p3_2ss18TG20TG_2	sp|Q9LPS1|HXK3_ARATH Hexokinase-3 OS=Arabidopsis thaliana GN=At1g50460 PE=1 SV=1
ko00010	Glycolysis / Gluconeogenesis	comp68387_c0	col-miRn-5p-1103_1978	sp|P77748|YDIJ_ECOLI Uncharacterized protein YdiJ OS=Escherichia coli (strain K12) GN=ydiJ PE=4 SV=1
ko00010	Glycolysis / Gluconeogenesis	comp62562_c0	ccl-miR171	sp|B7MNB1|OPGB_ECO45 Phosphoglycerol transferase I OS=Escherichia coli O45:K1 (strain S88 / ExPEC) GN=mdoB PE=3 SV=1
ko00010	Glycolysis / Gluconeogenesis	comp62562_c0	ccl-miR171	sp|B7MNB1|OPGB_ECO45 Phosphoglycerol transferase I OS=Escherichia coli O45:K1 (strain S88 / ExPEC) GN=mdoB PE=3 SV=1
ko00010	Glycolysis / Gluconeogenesis	comp65000_c0	col-miRn-3p-91142_48	sp|Q8RWN9|OPD22_ARATH Dihydrolipoyllysine-residue acetyltransferase component 2 of pyruvate dehydrogenase complex, mitochondrial OS=Arabidopsis thaliana GN=At3g13930 PE=1 SV=2
ko00561	Glycerolipid metabolism	comp64577_c0	mdm-MIR391-p5_2ss16CT20GA	sp|P0ABD0|BETT_ECO57 High-affinity choline transport protein OS=Escherichia coli O157:H7 GN=betT PE=3 SV=1
ko00561	Glycerolipid metabolism	comp68457_c0	bol-miR171a_1ss19AG	sp|P77802|YAGX_ECOLI Uncharacterized protein YagX OS=Escherichia coli (strain K12) GN=yagX PE=4 SV=1
ko00561	Glycerolipid metabolism	comp68419_c0	bol-miR171a_1ss19AG	sp|P52647|NIFJ_ECOLI Probable pyruvate-flavodoxin oxidoreductase OS=Escherichia coli (strain K12) GN=ydbK PE=3 SV=2
ko00561	Glycerolipid metabolism	comp68319_c0	col-miRn-3p-16403_272	sp|P77802|YAGX_ECOLI Uncharacterized protein YagX OS=Escherichia coli (strain K12) GN=yagX PE=4 SV=1
ko00561	Glycerolipid metabolism	comp68319_c0	col-miRn-3p-16403_272	sp|P77802|YAGX_ECOLI Uncharacterized protein YagX OS=Escherichia coli (strain K12) GN=yagX PE=4 SV=1
ko00561	Glycerolipid metabolism	comp62562_c0	col-miRn-3p-253727_10	sp|B7MNB1|OPGB_ECO45 Phosphoglycerol transferase I OS=Escherichia coli O45:K1 (strain S88 / ExPEC) GN=mdoB PE=3 SV=1
ko00561	Glycerolipid metabolism	comp66965_c0	col-miRn-3p-253727_10	sp|P17888|PRIA_ECOLI Primosomal protein N' OS=Escherichia coli (strain K12) GN=priA PE=1 SV=2
ko00561	Glycerolipid metabolism	comp64577_c0	col-miRn-3p-145806_25	sp|P0ABD0|BETT_ECO57 High-affinity choline transport protein OS=Escherichia coli O157:H7 GN=betT PE=3 SV=1
ko00561	Glycerolipid metabolism	comp68457_c0	ppe-miR399b_L-2R+2	sp|P77802|YAGX_ECOLI Uncharacterized protein YagX OS=Escherichia coli (strain K12) GN=yagX PE=4 SV=1
ko00561	Glycerolipid metabolism	comp55426_c0	ppe-miR399b_L-2R+2	sp|Q8W033|AL3I1_ARATH Aldehyde dehydrogenase family 3 member I1, chloroplastic OS=Arabidopsis thaliana GN=ALDH3I1 PE=2 SV=2
ko00561	Glycerolipid metabolism	comp62562_c0	crt-miR168_L-2	sp|B7MNB1|OPGB_ECO45 Phosphoglycerol transferase I OS=Escherichia coli O45:K1 (strain S88 / ExPEC) GN=mdoB PE=3 SV=1
ko00561	Glycerolipid metabolism	comp62562_c0	crt-miR168_L-2	sp|B7MNB1|OPGB_ECO45 Phosphoglycerol transferase I OS=Escherichia coli O45:K1 (strain S88 / ExPEC) GN=mdoB PE=3 SV=1
ko00561	Glycerolipid metabolism	comp68319_c0	crt-miR168_L-2	sp|P77802|YAGX_ECOLI Uncharacterized protein YagX OS=Escherichia coli (strain K12) GN=yagX PE=4 SV=1
ko00561	Glycerolipid metabolism	comp68457_c0	crt-miR168_L-2	sp|P77802|YAGX_ECOLI Uncharacterized protein YagX OS=Escherichia coli (strain K12) GN=yagX PE=4 SV=1
ko00561	Glycerolipid metabolism	comp53320_c0	crt-miR168_L-2	sp|Q9C5E5|DGK5_ARATH Diacylglycerol kinase 5 OS=Arabidopsis thaliana GN=DGK5 PE=2 SV=1
ko00561	Glycerolipid metabolism	comp65522_c0	ptc-miR172a	sp|P17888|PRIA_ECOLI Primosomal protein N' OS=Escherichia coli (strain K12) GN=priA PE=1 SV=2
ko00561	Glycerolipid metabolism	comp68319_c0	ptc-miR172a	sp|P77802|YAGX_ECOLI Uncharacterized protein YagX OS=Escherichia coli (strain K12) GN=yagX PE=4 SV=1
ko00561	Glycerolipid metabolism	comp67128_c0	aly-miR169b-3p_2ss12C-15CT	sp|Q9SU63|AL2B4_ARATH Aldehyde dehydrogenase family 2 member B4, mitochondrial OS=Arabidopsis thaliana GN=ALDH2B4 PE=2 SV=1
ko00561	Glycerolipid metabolism	comp68457_c0	sly-miR319c-5p_2ss8CT15CT	sp|P77802|YAGX_ECOLI Uncharacterized protein YagX OS=Escherichia coli (strain K12) GN=yagX PE=4 SV=1
ko00561	Glycerolipid metabolism	comp68319_c0	csi-miR172c_L-1_1ss6TA	sp|P77802|YAGX_ECOLI Uncharacterized protein YagX OS=Escherichia coli (strain K12) GN=yagX PE=4 SV=1
ko00561	Glycerolipid metabolism	comp68457_c0	aly-MIR394a-p3_2ss16CA17TG	sp|P77802|YAGX_ECOLI Uncharacterized protein YagX OS=Escherichia coli (strain K12) GN=yagX PE=4 SV=1
ko00561	Glycerolipid metabolism	comp68319_c0	aly-MIR394a-p3_2ss16CA17TG	sp|P77802|YAGX_ECOLI Uncharacterized protein YagX OS=Escherichia coli (strain K12) GN=yagX PE=4 SV=1
ko00561	Glycerolipid metabolism	comp68319_c0	aly-MIR394a-p3_2ss16CA17TG	sp|P77802|YAGX_ECOLI Uncharacterized protein YagX OS=Escherichia coli (strain K12) GN=yagX PE=4 SV=1
ko00561	Glycerolipid metabolism	comp66965_c0	aly-MIR394a-p3_2ss16CA17TG	sp|P17888|PRIA_ECOLI Primosomal protein N' OS=Escherichia coli (strain K12) GN=priA PE=1 SV=2
ko00561	Glycerolipid metabolism	comp65522_c0	ppe-miR397_1ss10GC	sp|P17888|PRIA_ECOLI Primosomal protein N' OS=Escherichia coli (strain K12) GN=priA PE=1 SV=2
ko00561	Glycerolipid metabolism	comp68419_c0	ssl-miR171b	sp|P52647|NIFJ_ECOLI Probable pyruvate-flavodoxin oxidoreductase OS=Escherichia coli (strain K12) GN=ydbK PE=3 SV=2
ko00561	Glycerolipid metabolism	comp64577_c0	ssl-miR171b	sp|P0ABD0|BETT_ECO57 High-affinity choline transport protein OS=Escherichia coli O157:H7 GN=betT PE=3 SV=1
ko00561	Glycerolipid metabolism	comp67705_c0	mtr-miR156h-3p_1ss8AC	-
ko00561	Glycerolipid metabolism	comp68419_c0	mtr-miR156h-3p_1ss8AC	sp|P52647|NIFJ_ECOLI Probable pyruvate-flavodoxin oxidoreductase OS=Escherichia coli (strain K12) GN=ydbK PE=3 SV=2
ko00561	Glycerolipid metabolism	comp66965_c0	mtr-miR156h-3p_1ss8AC	sp|P17888|PRIA_ECOLI Primosomal protein N' OS=Escherichia coli (strain K12) GN=priA PE=1 SV=2
ko00561	Glycerolipid metabolism	comp67742_c0	mtr-miR156h-3p_1ss8AC	sp|Q9C5E5|DGK5_ARATH Diacylglycerol kinase 5 OS=Arabidopsis thaliana GN=DGK5 PE=2 SV=1
ko00561	Glycerolipid metabolism	comp58812_c0	gma-MIR4393b-p3_2ss9AG18AG	sp|P30864|YAFC_ECOLI Uncharacterized HTH-type transcriptional regulator YafC OS=Escherichia coli (strain K12) GN=yafC PE=4 SV=1
ko00561	Glycerolipid metabolism	comp68419_c0	mes-miR530a_R+1_1ss20TG	sp|P52647|NIFJ_ECOLI Probable pyruvate-flavodoxin oxidoreductase OS=Escherichia coli (strain K12) GN=ydbK PE=3 SV=2
ko00561	Glycerolipid metabolism	comp68319_c0	aqc-miR169c_R+1_1ss20GA	sp|P77802|YAGX_ECOLI Uncharacterized protein YagX OS=Escherichia coli (strain K12) GN=yagX PE=4 SV=1
ko00561	Glycerolipid metabolism	comp4673_c0	ppe-MIR482a-p3_3ss12TA21AT22AC	sp|Q9FNA9|PDAT1_ARATH Phospholipid:diacylglycerol acyltransferase 1 OS=Arabidopsis thaliana GN=PDAT1 PE=2 SV=1
ko00561	Glycerolipid metabolism	comp68457_c0	rco-miR171c	sp|P77802|YAGX_ECOLI Uncharacterized protein YagX OS=Escherichia coli (strain K12) GN=yagX PE=4 SV=1
ko00561	Glycerolipid metabolism	comp55426_c0	mdm-miR7122a_2ss4TA21CG	sp|Q8W033|AL3I1_ARATH Aldehyde dehydrogenase family 3 member I1, chloroplastic OS=Arabidopsis thaliana GN=ALDH3I1 PE=2 SV=2
ko00561	Glycerolipid metabolism	comp65522_c0	cpa-miR393_R-1	sp|P17888|PRIA_ECOLI Primosomal protein N' OS=Escherichia coli (strain K12) GN=priA PE=1 SV=2
ko00561	Glycerolipid metabolism	comp68319_c0	ccl-miR167a	sp|P77802|YAGX_ECOLI Uncharacterized protein YagX OS=Escherichia coli (strain K12) GN=yagX PE=4 SV=1
ko00561	Glycerolipid metabolism	comp68319_c0	ath-miR390a-5p	sp|P77802|YAGX_ECOLI Uncharacterized protein YagX OS=Escherichia coli (strain K12) GN=yagX PE=4 SV=1
ko00561	Glycerolipid metabolism	comp62562_c0	ppe-miR1511-3p_L+1R-4	sp|B7MNB1|OPGB_ECO45 Phosphoglycerol transferase I OS=Escherichia coli O45:K1 (strain S88 / ExPEC) GN=mdoB PE=3 SV=1
ko00561	Glycerolipid metabolism	comp68457_c0	mdm-miR408a_L-1R+1	sp|P77802|YAGX_ECOLI Uncharacterized protein YagX OS=Escherichia coli (strain K12) GN=yagX PE=4 SV=1
ko00561	Glycerolipid metabolism	comp68319_c0	tcc-miR390a	sp|P77802|YAGX_ECOLI Uncharacterized protein YagX OS=Escherichia coli (strain K12) GN=yagX PE=4 SV=1
ko00561	Glycerolipid metabolism	comp68457_c0	aly-miR399f-3p	sp|P77802|YAGX_ECOLI Uncharacterized protein YagX OS=Escherichia coli (strain K12) GN=yagX PE=4 SV=1
ko00561	Glycerolipid metabolism	comp62562_c0	aly-miR399f-3p	sp|B7MNB1|OPGB_ECO45 Phosphoglycerol transferase I OS=Escherichia coli O45:K1 (strain S88 / ExPEC) GN=mdoB PE=3 SV=1
ko00561	Glycerolipid metabolism	comp68319_c0	aly-miR399f-3p	sp|P77802|YAGX_ECOLI Uncharacterized protein YagX OS=Escherichia coli (strain K12) GN=yagX PE=4 SV=1
ko00561	Glycerolipid metabolism	comp65522_c0	aly-miR399f-3p	sp|P17888|PRIA_ECOLI Primosomal protein N' OS=Escherichia coli (strain K12) GN=priA PE=1 SV=2
ko00561	Glycerolipid metabolism	comp68319_c0	hpe-miR162a_L-2	sp|P77802|YAGX_ECOLI Uncharacterized protein YagX OS=Escherichia coli (strain K12) GN=yagX PE=4 SV=1
ko00561	Glycerolipid metabolism	comp68319_c0	hpe-miR162a_L-2	sp|P77802|YAGX_ECOLI Uncharacterized protein YagX OS=Escherichia coli (strain K12) GN=yagX PE=4 SV=1
ko00561	Glycerolipid metabolism	comp61861_c0	hpe-miR162a_L-2	sp|O04059|DHBK_SOLLC Putative 3,4-dihydroxy-2-butanone kinase OS=Solanum lycopersicum GN=DHBK PE=2 SV=1
ko00561	Glycerolipid metabolism	comp64577_c0	ath-MIR5645e-p3_1ss18TA	sp|P0ABD0|BETT_ECO57 High-affinity choline transport protein OS=Escherichia coli O157:H7 GN=betT PE=3 SV=1
ko00561	Glycerolipid metabolism	comp64577_c0	dpr-miR167a_R+1	sp|P0ABD0|BETT_ECO57 High-affinity choline transport protein OS=Escherichia coli O157:H7 GN=betT PE=3 SV=1
ko00561	Glycerolipid metabolism	comp68319_c0	dpr-miR167a_R+1	sp|P77802|YAGX_ECOLI Uncharacterized protein YagX OS=Escherichia coli (strain K12) GN=yagX PE=4 SV=1
ko00561	Glycerolipid metabolism	comp62231_c0	stu-MIR5303j-p5_2ss10GT17CT	sp|Q9SYG7|AL7B4_ARATH Aldehyde dehydrogenase family 7 member B4 OS=Arabidopsis thaliana GN=ALDH7B4 PE=2 SV=3
ko00561	Glycerolipid metabolism	comp4673_c0	stu-MIR5303j-p5_2ss10GT17CT	sp|Q9FNA9|PDAT1_ARATH Phospholipid:diacylglycerol acyltransferase 1 OS=Arabidopsis thaliana GN=PDAT1 PE=2 SV=1
ko00561	Glycerolipid metabolism	comp61861_c0	stu-MIR5303j-p5_2ss10GT17CT	sp|O04059|DHBK_SOLLC Putative 3,4-dihydroxy-2-butanone kinase OS=Solanum lycopersicum GN=DHBK PE=2 SV=1
ko00561	Glycerolipid metabolism	comp67742_c0	mdm-miR167h_1ss22AT	sp|Q9C5E5|DGK5_ARATH Diacylglycerol kinase 5 OS=Arabidopsis thaliana GN=DGK5 PE=2 SV=1
ko00561	Glycerolipid metabolism	comp65522_c0	ctr-miR164_R-1	sp|P17888|PRIA_ECOLI Primosomal protein N' OS=Escherichia coli (strain K12) GN=priA PE=1 SV=2
ko00561	Glycerolipid metabolism	comp68419_c0	ctr-miR164_R-1	sp|P52647|NIFJ_ECOLI Probable pyruvate-flavodoxin oxidoreductase OS=Escherichia coli (strain K12) GN=ydbK PE=3 SV=2
ko00561	Glycerolipid metabolism	comp68319_c0	ctr-miR164_R-1	sp|P77802|YAGX_ECOLI Uncharacterized protein YagX OS=Escherichia coli (strain K12) GN=yagX PE=4 SV=1
ko00561	Glycerolipid metabolism	comp68457_c0	ctr-miR164_R-1	sp|P77802|YAGX_ECOLI Uncharacterized protein YagX OS=Escherichia coli (strain K12) GN=yagX PE=4 SV=1
ko00561	Glycerolipid metabolism	comp62562_c0	ctr-miR164_R-1	sp|B7MNB1|OPGB_ECO45 Phosphoglycerol transferase I OS=Escherichia coli O45:K1 (strain S88 / ExPEC) GN=mdoB PE=3 SV=1
ko00561	Glycerolipid metabolism	comp68457_c0	csi-miR166e-5p_L-1R+1_1ss21GA	sp|P77802|YAGX_ECOLI Uncharacterized protein YagX OS=Escherichia coli (strain K12) GN=yagX PE=4 SV=1
ko00561	Glycerolipid metabolism	comp68319_c0	bna-miR168a	sp|P77802|YAGX_ECOLI Uncharacterized protein YagX OS=Escherichia coli (strain K12) GN=yagX PE=4 SV=1
ko00561	Glycerolipid metabolism	comp62562_c0	bna-miR168a	sp|B7MNB1|OPGB_ECO45 Phosphoglycerol transferase I OS=Escherichia coli O45:K1 (strain S88 / ExPEC) GN=mdoB PE=3 SV=1
ko00561	Glycerolipid metabolism	comp68419_c0	gma-MIR828a-p3_2ss3AC18CA	sp|P52647|NIFJ_ECOLI Probable pyruvate-flavodoxin oxidoreductase OS=Escherichia coli (strain K12) GN=ydbK PE=3 SV=2
ko00561	Glycerolipid metabolism	comp68419_c0	gma-MIR828a-p3_2ss3AC18CA	sp|P52647|NIFJ_ECOLI Probable pyruvate-flavodoxin oxidoreductase OS=Escherichia coli (strain K12) GN=ydbK PE=3 SV=2
ko00561	Glycerolipid metabolism	comp68419_c0	gma-MIR828a-p3_2ss3AC18CA	sp|P52647|NIFJ_ECOLI Probable pyruvate-flavodoxin oxidoreductase OS=Escherichia coli (strain K12) GN=ydbK PE=3 SV=2
ko00561	Glycerolipid metabolism	comp68457_c0	gma-MIR828a-p3_2ss3AC18CA	sp|P77802|YAGX_ECOLI Uncharacterized protein YagX OS=Escherichia coli (strain K12) GN=yagX PE=4 SV=1
ko00561	Glycerolipid metabolism	comp68457_c0	gma-MIR828a-p3_2ss3AC18CA	sp|P77802|YAGX_ECOLI Uncharacterized protein YagX OS=Escherichia coli (strain K12) GN=yagX PE=4 SV=1
ko00561	Glycerolipid metabolism	comp36715_c0	gma-MIR828a-p3_2ss3AC18CA	sp|Q8S528|AL2B7_ARATH Aldehyde dehydrogenase family 2 member B7, mitochondrial OS=Arabidopsis thaliana GN=ALDH2B7 PE=2 SV=2
ko00561	Glycerolipid metabolism	comp64577_c0	gma-MIR828a-p3_2ss3AC18CA	sp|P0ABD0|BETT_ECO57 High-affinity choline transport protein OS=Escherichia coli O157:H7 GN=betT PE=3 SV=1
ko00561	Glycerolipid metabolism	comp64577_c0	gma-MIR828a-p3_2ss3AC18CA	sp|P0ABD0|BETT_ECO57 High-affinity choline transport protein OS=Escherichia coli O157:H7 GN=betT PE=3 SV=1
ko00561	Glycerolipid metabolism	comp66965_c0	gma-MIR828a-p3_2ss3AC18CA	sp|P17888|PRIA_ECOLI Primosomal protein N' OS=Escherichia coli (strain K12) GN=priA PE=1 SV=2
ko00561	Glycerolipid metabolism	comp65522_c0	gma-MIR828a-p3_2ss3AC18CA	sp|P17888|PRIA_ECOLI Primosomal protein N' OS=Escherichia coli (strain K12) GN=priA PE=1 SV=2
ko00561	Glycerolipid metabolism	comp66627_c0	mtr-MIR2592bj-p3_2ss12TC19AT_2	sp|F4JQ95|DGK7_ARATH Diacylglycerol kinase 7 OS=Arabidopsis thaliana GN=DGK7 PE=1 SV=1
ko00561	Glycerolipid metabolism	comp68419_c0	mtr-MIR2592bj-p3_2ss12TC19AT_2	sp|P52647|NIFJ_ECOLI Probable pyruvate-flavodoxin oxidoreductase OS=Escherichia coli (strain K12) GN=ydbK PE=3 SV=2
ko00561	Glycerolipid metabolism	comp68419_c0	hbr-miR398_2ss9CT21GC	sp|P52647|NIFJ_ECOLI Probable pyruvate-flavodoxin oxidoreductase OS=Escherichia coli (strain K12) GN=ydbK PE=3 SV=2
ko00561	Glycerolipid metabolism	comp68419_c0	ath-miR858b	sp|P52647|NIFJ_ECOLI Probable pyruvate-flavodoxin oxidoreductase OS=Escherichia coli (strain K12) GN=ydbK PE=3 SV=2
ko00561	Glycerolipid metabolism	comp68319_c0	ath-miR858b	sp|P77802|YAGX_ECOLI Uncharacterized protein YagX OS=Escherichia coli (strain K12) GN=yagX PE=4 SV=1
ko00561	Glycerolipid metabolism	comp62562_c0	rgl-miR5139_L-1	sp|B7MNB1|OPGB_ECO45 Phosphoglycerol transferase I OS=Escherichia coli O45:K1 (strain S88 / ExPEC) GN=mdoB PE=3 SV=1
ko00561	Glycerolipid metabolism	comp68457_c0	gma-miR408a-3p_L-1R+1	sp|P77802|YAGX_ECOLI Uncharacterized protein YagX OS=Escherichia coli (strain K12) GN=yagX PE=4 SV=1
ko00561	Glycerolipid metabolism	comp64577_c0	ghr-MIR7499-p3_2ss10GC17CG	sp|P0ABD0|BETT_ECO57 High-affinity choline transport protein OS=Escherichia coli O157:H7 GN=betT PE=3 SV=1
ko00561	Glycerolipid metabolism	comp67705_c0	ghr-MIR7499-p3_2ss10GC17CG	-
ko00561	Glycerolipid metabolism	comp58812_c0	ghr-MIR7499-p3_2ss10GC17CG	sp|P30864|YAFC_ECOLI Uncharacterized HTH-type transcriptional regulator YafC OS=Escherichia coli (strain K12) GN=yafC PE=4 SV=1
ko00561	Glycerolipid metabolism	comp68457_c0	ptc-miR6478_R+2_1ss21GA	sp|P77802|YAGX_ECOLI Uncharacterized protein YagX OS=Escherichia coli (strain K12) GN=yagX PE=4 SV=1
ko00561	Glycerolipid metabolism	comp68457_c0	col-miRn-5p-32910_149	sp|P77802|YAGX_ECOLI Uncharacterized protein YagX OS=Escherichia coli (strain K12) GN=yagX PE=4 SV=1
ko00561	Glycerolipid metabolism	comp66965_c0	cpa-miR160c-3p	sp|P17888|PRIA_ECOLI Primosomal protein N' OS=Escherichia coli (strain K12) GN=priA PE=1 SV=2
ko00561	Glycerolipid metabolism	comp68419_c0	cpa-miR160c-3p	sp|P52647|NIFJ_ECOLI Probable pyruvate-flavodoxin oxidoreductase OS=Escherichia coli (strain K12) GN=ydbK PE=3 SV=2
ko00561	Glycerolipid metabolism	comp68319_c0	vun-miR169	sp|P77802|YAGX_ECOLI Uncharacterized protein YagX OS=Escherichia coli (strain K12) GN=yagX PE=4 SV=1
ko00561	Glycerolipid metabolism	comp68457_c0	csi-miR166e-5p	sp|P77802|YAGX_ECOLI Uncharacterized protein YagX OS=Escherichia coli (strain K12) GN=yagX PE=4 SV=1
ko00561	Glycerolipid metabolism	comp68419_c0	csi-miR166e-5p	sp|P52647|NIFJ_ECOLI Probable pyruvate-flavodoxin oxidoreductase OS=Escherichia coli (strain K12) GN=ydbK PE=3 SV=2
ko00561	Glycerolipid metabolism	comp68319_c0	aly-miR171c-5p_2ss1AG21CA	sp|P77802|YAGX_ECOLI Uncharacterized protein YagX OS=Escherichia coli (strain K12) GN=yagX PE=4 SV=1
ko00561	Glycerolipid metabolism	comp68457_c0	aly-miR166g-5p_2ss10TG20GT	sp|P77802|YAGX_ECOLI Uncharacterized protein YagX OS=Escherichia coli (strain K12) GN=yagX PE=4 SV=1
ko00561	Glycerolipid metabolism	comp65522_c0	gma-miR393a	sp|P17888|PRIA_ECOLI Primosomal protein N' OS=Escherichia coli (strain K12) GN=priA PE=1 SV=2
ko00561	Glycerolipid metabolism	comp68419_c0	htu-miR160a_R+1	sp|P52647|NIFJ_ECOLI Probable pyruvate-flavodoxin oxidoreductase OS=Escherichia coli (strain K12) GN=ydbK PE=3 SV=2
ko00561	Glycerolipid metabolism	comp58293_c0	tcc-miR403a	sp|Q84KI6|SQD1_SPIOL UDP-sulfoquinovose synthase, chloroplastic OS=Spinacia oleracea GN=SQD1 PE=1 SV=1
ko00561	Glycerolipid metabolism	comp67470_c0	tcc-miR403a	sp|Q42656|AGAL_COFAR Alpha-galactosidase OS=Coffea arabica PE=1 SV=1
ko00561	Glycerolipid metabolism	comp68457_c0	dpr-miR408_L-1	sp|P77802|YAGX_ECOLI Uncharacterized protein YagX OS=Escherichia coli (strain K12) GN=yagX PE=4 SV=1
ko00561	Glycerolipid metabolism	comp68419_c0	ptc-miR172b-5p	sp|P52647|NIFJ_ECOLI Probable pyruvate-flavodoxin oxidoreductase OS=Escherichia coli (strain K12) GN=ydbK PE=3 SV=2
ko00561	Glycerolipid metabolism	comp66965_c0	ssl-miR828	sp|P17888|PRIA_ECOLI Primosomal protein N' OS=Escherichia coli (strain K12) GN=priA PE=1 SV=2
ko00561	Glycerolipid metabolism	comp65522_c0	aqc-miR172b_1ss21TG	sp|P17888|PRIA_ECOLI Primosomal protein N' OS=Escherichia coli (strain K12) GN=priA PE=1 SV=2
ko00561	Glycerolipid metabolism	comp66899_c1	ama-miR396-5p_1ss21TG	sp|Q9SU63|AL2B4_ARATH Aldehyde dehydrogenase family 2 member B4, mitochondrial OS=Arabidopsis thaliana GN=ALDH2B4 PE=2 SV=1
ko00561	Glycerolipid metabolism	comp63729_c0	ama-miR396-5p_1ss21TG	sp|Q0PGJ6|AKRC9_ARATH Aldo-keto reductase family 4 member C9 OS=Arabidopsis thaliana GN=AKR4C9 PE=1 SV=1
ko00561	Glycerolipid metabolism	comp67742_c0	lja-miR167_R+1_1ss21GT	sp|Q9C5E5|DGK5_ARATH Diacylglycerol kinase 5 OS=Arabidopsis thaliana GN=DGK5 PE=2 SV=1
ko00561	Glycerolipid metabolism	comp68319_c0	lja-miR390a-3p_1ss8CT	sp|P77802|YAGX_ECOLI Uncharacterized protein YagX OS=Escherichia coli (strain K12) GN=yagX PE=4 SV=1
ko00561	Glycerolipid metabolism	comp68319_c0	lja-miR390a-3p_1ss8CT	sp|P77802|YAGX_ECOLI Uncharacterized protein YagX OS=Escherichia coli (strain K12) GN=yagX PE=4 SV=1
ko00561	Glycerolipid metabolism	comp68457_c0	lus-MIR156a-p3_1ss21CT	sp|P77802|YAGX_ECOLI Uncharacterized protein YagX OS=Escherichia coli (strain K12) GN=yagX PE=4 SV=1
ko00561	Glycerolipid metabolism	comp66965_c0	lus-MIR156a-p3_1ss21CT	sp|P17888|PRIA_ECOLI Primosomal protein N' OS=Escherichia coli (strain K12) GN=priA PE=1 SV=2
ko00561	Glycerolipid metabolism	comp68457_c0	gra-miR167a_L-2R+2	sp|P77802|YAGX_ECOLI Uncharacterized protein YagX OS=Escherichia coli (strain K12) GN=yagX PE=4 SV=1
ko00561	Glycerolipid metabolism	comp68457_c0	gra-miR167a_L-2R+2	sp|P77802|YAGX_ECOLI Uncharacterized protein YagX OS=Escherichia coli (strain K12) GN=yagX PE=4 SV=1
ko00561	Glycerolipid metabolism	comp68457_c0	gra-miR167a_L-2R+2	sp|P77802|YAGX_ECOLI Uncharacterized protein YagX OS=Escherichia coli (strain K12) GN=yagX PE=4 SV=1
ko00561	Glycerolipid metabolism	comp66899_c1	amg-miR396	sp|Q9SU63|AL2B4_ARATH Aldehyde dehydrogenase family 2 member B4, mitochondrial OS=Arabidopsis thaliana GN=ALDH2B4 PE=2 SV=1
ko00561	Glycerolipid metabolism	comp63729_c0	amg-miR396	sp|Q0PGJ6|AKRC9_ARATH Aldo-keto reductase family 4 member C9 OS=Arabidopsis thaliana GN=AKR4C9 PE=1 SV=1
ko00561	Glycerolipid metabolism	comp68419_c0	aly-miR171c-5p_1ss5AG	sp|P52647|NIFJ_ECOLI Probable pyruvate-flavodoxin oxidoreductase OS=Escherichia coli (strain K12) GN=ydbK PE=3 SV=2
ko00561	Glycerolipid metabolism	comp64577_c0	dpr-miR167a_L-2R+3	sp|P0ABD0|BETT_ECO57 High-affinity choline transport protein OS=Escherichia coli O157:H7 GN=betT PE=3 SV=1
ko00561	Glycerolipid metabolism	comp68419_c0	lja-miR171c	sp|P52647|NIFJ_ECOLI Probable pyruvate-flavodoxin oxidoreductase OS=Escherichia coli (strain K12) GN=ydbK PE=3 SV=2
ko00561	Glycerolipid metabolism	comp68419_c0	gma-miR319a	sp|P52647|NIFJ_ECOLI Probable pyruvate-flavodoxin oxidoreductase OS=Escherichia coli (strain K12) GN=ydbK PE=3 SV=2
ko00561	Glycerolipid metabolism	comp66965_c0	gma-miR319a	sp|P17888|PRIA_ECOLI Primosomal protein N' OS=Escherichia coli (strain K12) GN=priA PE=1 SV=2
ko00561	Glycerolipid metabolism	comp68319_c0	col-miRn-5p-46619_106	sp|P77802|YAGX_ECOLI Uncharacterized protein YagX OS=Escherichia coli (strain K12) GN=yagX PE=4 SV=1
ko00561	Glycerolipid metabolism	comp65522_c0	ama-miR396-3p_L-2R+2	sp|P17888|PRIA_ECOLI Primosomal protein N' OS=Escherichia coli (strain K12) GN=priA PE=1 SV=2
ko00561	Glycerolipid metabolism	comp68419_c0	ahy-miR167-3p_2ss8GA15TC	sp|P52647|NIFJ_ECOLI Probable pyruvate-flavodoxin oxidoreductase OS=Escherichia coli (strain K12) GN=ydbK PE=3 SV=2
ko00561	Glycerolipid metabolism	comp65522_c0	nta-miR172d	sp|P17888|PRIA_ECOLI Primosomal protein N' OS=Escherichia coli (strain K12) GN=priA PE=1 SV=2
ko00561	Glycerolipid metabolism	comp68319_c0	nta-miR172d	sp|P77802|YAGX_ECOLI Uncharacterized protein YagX OS=Escherichia coli (strain K12) GN=yagX PE=4 SV=1
ko00561	Glycerolipid metabolism	comp65522_c0	cpa-miR164a	sp|P17888|PRIA_ECOLI Primosomal protein N' OS=Escherichia coli (strain K12) GN=priA PE=1 SV=2
ko00561	Glycerolipid metabolism	comp68419_c0	cpa-miR164a	sp|P52647|NIFJ_ECOLI Probable pyruvate-flavodoxin oxidoreductase OS=Escherichia coli (strain K12) GN=ydbK PE=3 SV=2
ko00561	Glycerolipid metabolism	comp62562_c0	cpa-miR164a	sp|B7MNB1|OPGB_ECO45 Phosphoglycerol transferase I OS=Escherichia coli O45:K1 (strain S88 / ExPEC) GN=mdoB PE=3 SV=1
ko00561	Glycerolipid metabolism	comp62515_c0	col-miRn-5p-17637_256	sp|Q70E96|AL3F1_ARATH Aldehyde dehydrogenase family 3 member F1 OS=Arabidopsis thaliana GN=ALDH3F1 PE=2 SV=2
ko00561	Glycerolipid metabolism	comp68457_c0	aly-miR171b-3p_1ss19AG	sp|P77802|YAGX_ECOLI Uncharacterized protein YagX OS=Escherichia coli (strain K12) GN=yagX PE=4 SV=1
ko00561	Glycerolipid metabolism	comp68419_c0	aly-miR171b-3p_1ss19AG	sp|P52647|NIFJ_ECOLI Probable pyruvate-flavodoxin oxidoreductase OS=Escherichia coli (strain K12) GN=ydbK PE=3 SV=2
ko00561	Glycerolipid metabolism	comp64577_c0	aqc-MIR172b-p3_1ss9TC	sp|P0ABD0|BETT_ECO57 High-affinity choline transport protein OS=Escherichia coli O157:H7 GN=betT PE=3 SV=1
ko00561	Glycerolipid metabolism	comp68419_c0	lja-miR171d-3p	sp|P52647|NIFJ_ECOLI Probable pyruvate-flavodoxin oxidoreductase OS=Escherichia coli (strain K12) GN=ydbK PE=3 SV=2
ko00561	Glycerolipid metabolism	comp68419_c0	lja-miR171d-3p	sp|P52647|NIFJ_ECOLI Probable pyruvate-flavodoxin oxidoreductase OS=Escherichia coli (strain K12) GN=ydbK PE=3 SV=2
ko00561	Glycerolipid metabolism	comp66899_c1	lja-miR171d-3p	sp|Q9SU63|AL2B4_ARATH Aldehyde dehydrogenase family 2 member B4, mitochondrial OS=Arabidopsis thaliana GN=ALDH2B4 PE=2 SV=1
ko00561	Glycerolipid metabolism	comp68319_c0	cca-miR396a-3p_2ss7GT21AG	sp|P77802|YAGX_ECOLI Uncharacterized protein YagX OS=Escherichia coli (strain K12) GN=yagX PE=4 SV=1
ko00561	Glycerolipid metabolism	comp53320_c0	mtr-MIR2592bj-p3_2ss12TC19AT_1	sp|Q9C5E5|DGK5_ARATH Diacylglycerol kinase 5 OS=Arabidopsis thaliana GN=DGK5 PE=2 SV=1
ko00561	Glycerolipid metabolism	comp49242_c0	mtr-MIR2592bj-p3_2ss12TC19AT_1	sp|Q8S528|AL2B7_ARATH Aldehyde dehydrogenase family 2 member B7, mitochondrial OS=Arabidopsis thaliana GN=ALDH2B7 PE=2 SV=2
ko00561	Glycerolipid metabolism	comp68419_c0	mtr-MIR2592bj-p3_2ss12TC19AT_1	sp|P52647|NIFJ_ECOLI Probable pyruvate-flavodoxin oxidoreductase OS=Escherichia coli (strain K12) GN=ydbK PE=3 SV=2
ko00561	Glycerolipid metabolism	comp65522_c0	ath-miR172a	sp|P17888|PRIA_ECOLI Primosomal protein N' OS=Escherichia coli (strain K12) GN=priA PE=1 SV=2
ko00561	Glycerolipid metabolism	comp68319_c0	ath-miR172a	sp|P77802|YAGX_ECOLI Uncharacterized protein YagX OS=Escherichia coli (strain K12) GN=yagX PE=4 SV=1
ko00561	Glycerolipid metabolism	comp64140_c0	col-miRn-3p-150062_24	sp|Q9XFW4|LPAT2_BRANA 1-acyl-sn-glycerol-3-phosphate acyltransferase 2 OS=Brassica napus GN=LPAT2 PE=2 SV=1
ko00561	Glycerolipid metabolism	comp62562_c0	ptc-miR1448_L+1R+1	sp|B7MNB1|OPGB_ECO45 Phosphoglycerol transferase I OS=Escherichia coli O45:K1 (strain S88 / ExPEC) GN=mdoB PE=3 SV=1
ko00561	Glycerolipid metabolism	comp68319_c0	rco-miR167a_R+1	sp|P77802|YAGX_ECOLI Uncharacterized protein YagX OS=Escherichia coli (strain K12) GN=yagX PE=4 SV=1
ko00561	Glycerolipid metabolism	comp62562_c0	ccl-miR171	sp|B7MNB1|OPGB_ECO45 Phosphoglycerol transferase I OS=Escherichia coli O45:K1 (strain S88 / ExPEC) GN=mdoB PE=3 SV=1
ko00561	Glycerolipid metabolism	comp62562_c0	ccl-miR171	sp|B7MNB1|OPGB_ECO45 Phosphoglycerol transferase I OS=Escherichia coli O45:K1 (strain S88 / ExPEC) GN=mdoB PE=3 SV=1
ko00564	Glycerophospholipid metabolism	comp55086_c0	col-miRn-3p-16403_272	sp|Q9LRZ5|PLDP1_ARATH Phospholipase D p1 OS=Arabidopsis thaliana GN=PLDP1 PE=2 SV=1
ko00564	Glycerophospholipid metabolism	comp67188_c0	ppe-miR399b_L-2R+2	sp|Q9C5Y0|PLDD1_ARATH Phospholipase D delta OS=Arabidopsis thaliana GN=PLDDELTA PE=1 SV=2
ko00564	Glycerophospholipid metabolism	comp56789_c0	crt-miR168_L-2	sp|Q9XG80|PLA21_ORYSJ Probable phospholipase A2 homolog 1 OS=Oryza sativa subsp. japonica GN=PLA2-I PE=2 SV=1
ko00564	Glycerophospholipid metabolism	comp65995_c0	crt-miR168_L-2	sp|Q93ZM7|CH60C_ARATH Chaperonin CPN60-like 2, mitochondrial OS=Arabidopsis thaliana GN=At3g13860 PE=1 SV=2
ko00564	Glycerophospholipid metabolism	comp55086_c0	crt-miR168_L-2	sp|Q9LRZ5|PLDP1_ARATH Phospholipase D p1 OS=Arabidopsis thaliana GN=PLDP1 PE=2 SV=1
ko00564	Glycerophospholipid metabolism	comp53320_c0	crt-miR168_L-2	sp|Q9C5E5|DGK5_ARATH Diacylglycerol kinase 5 OS=Arabidopsis thaliana GN=DGK5 PE=2 SV=1
ko00564	Glycerophospholipid metabolism	comp57146_c0	hbr-MIR159b-p5_1ss10GT	sp|Q9SX31|PERK9_ARATH Proline-rich receptor-like protein kinase PERK9 OS=Arabidopsis thaliana GN=PERK9 PE=2 SV=1
ko00564	Glycerophospholipid metabolism	comp67806_c0	pvu-miR159a.1	sp|Q550W1|CAPTC_DICDI Uncharacterized CDP-alcohol phosphatidyltransferase class-I family protein 3 OS=Dictyostelium discoideum GN=captC PE=2 SV=1
ko00564	Glycerophospholipid metabolism	comp192562_c0	mtr-miR156h-3p_1ss8AC	sp|Q55BZ4|PCY2_DICDI Ethanolamine-phosphate cytidylyltransferase OS=Dictyostelium discoideum GN=pctA PE=1 SV=1
ko00564	Glycerophospholipid metabolism	comp55660_c0	mtr-miR156h-3p_1ss8AC	sp|Q9Y5K3|PCY1B_HUMAN Choline-phosphate cytidylyltransferase B OS=Homo sapiens GN=PCYT1B PE=1 SV=1
ko00564	Glycerophospholipid metabolism	comp67742_c0	mtr-miR156h-3p_1ss8AC	sp|Q9C5E5|DGK5_ARATH Diacylglycerol kinase 5 OS=Arabidopsis thaliana GN=DGK5 PE=2 SV=1
ko00564	Glycerophospholipid metabolism	comp57394_c0	aqc-miR169c_R+1_1ss20GA	sp|Q9LRZ5|PLDP1_ARATH Phospholipase D p1 OS=Arabidopsis thaliana GN=PLDP1 PE=2 SV=1
ko00564	Glycerophospholipid metabolism	comp64812_c0	rco-miR171c	sp|Q869T9|EKIA_DICDI Probable ethanolamine kinase A OS=Dictyostelium discoideum GN=etnkA PE=3 SV=1
ko00564	Glycerophospholipid metabolism	comp65554_c0	col-miRn-5p-68355_69	-
ko00564	Glycerophospholipid metabolism	comp11425_c0	hpe-miR162a_L-2	-
ko00564	Glycerophospholipid metabolism	comp65554_c0	col-miRn-5p-166889_20	-
ko00564	Glycerophospholipid metabolism	comp40074_c0	stu-MIR5303j-p5_2ss10GT17CT	-
ko00564	Glycerophospholipid metabolism	comp57763_c0	stu-MIR5303j-p5_2ss10GT17CT	sp|O54783|CHKB_RAT Choline/ethanolamine kinase OS=Rattus norvegicus GN=Chkb PE=1 SV=3
ko00564	Glycerophospholipid metabolism	comp67188_c0	stu-MIR5303j-p5_2ss10GT17CT	sp|Q9C5Y0|PLDD1_ARATH Phospholipase D delta OS=Arabidopsis thaliana GN=PLDDELTA PE=1 SV=2
ko00564	Glycerophospholipid metabolism	comp67188_c0	stu-MIR5303j-p5_2ss10GT17CT	sp|Q9C5Y0|PLDD1_ARATH Phospholipase D delta OS=Arabidopsis thaliana GN=PLDDELTA PE=1 SV=2
ko00564	Glycerophospholipid metabolism	comp222009_c0	stu-MIR5303j-p5_2ss10GT17CT	sp|Q9C5Y0|PLDD1_ARATH Phospholipase D delta OS=Arabidopsis thaliana GN=PLDDELTA PE=1 SV=2
ko00564	Glycerophospholipid metabolism	comp67742_c0	mdm-miR167h_1ss22AT	sp|Q9C5E5|DGK5_ARATH Diacylglycerol kinase 5 OS=Arabidopsis thaliana GN=DGK5 PE=2 SV=1
ko00564	Glycerophospholipid metabolism	comp65332_c0	gma-MIR828a-p3_2ss3AC18CA	sp|Q8LBA6|PIS1_ARATH CDP-diacylglycerol--inositol 3-phosphatidyltransferase 1 OS=Arabidopsis thaliana GN=PIS1 PE=1 SV=2
ko00564	Glycerophospholipid metabolism	comp66627_c0	mtr-MIR2592bj-p3_2ss12TC19AT_2	sp|F4JQ95|DGK7_ARATH Diacylglycerol kinase 7 OS=Arabidopsis thaliana GN=DGK7 PE=1 SV=1
ko00564	Glycerophospholipid metabolism	comp48862_c0	ghr-MIR7499-p3_2ss10GC17CG	sp|P86387|PLDA1_CARPA Phospholipase D alpha 1 OS=Carica papaya GN=PLD1 PE=1 SV=1
ko00564	Glycerophospholipid metabolism	comp62091_c0	col-miRn-5p-32910_149	sp|P93733|PLDB1_ARATH Phospholipase D beta 1 OS=Arabidopsis thaliana GN=PLDBETA1 PE=2 SV=4
ko00564	Glycerophospholipid metabolism	comp67188_c0	col-miRn-5p-32910_149	sp|Q9C5Y0|PLDD1_ARATH Phospholipase D delta OS=Arabidopsis thaliana GN=PLDDELTA PE=1 SV=2
ko00564	Glycerophospholipid metabolism	comp60032_c0	col-miRn-5p-32910_149	-
ko00564	Glycerophospholipid metabolism	comp42438_c0	bol-miR398a-3p	sp|Q43270|PLDA1_MAIZE Phospholipase D alpha 1 OS=Zea mays GN=PLD1 PE=2 SV=1
ko00564	Glycerophospholipid metabolism	comp64812_c0	crt-miR171_R+2	sp|Q869T9|EKIA_DICDI Probable ethanolamine kinase A OS=Dictyostelium discoideum GN=etnkA PE=3 SV=1
ko00564	Glycerophospholipid metabolism	comp62361_c0	aqc-miR399	sp|Q55BZ4|PCY2_DICDI Ethanolamine-phosphate cytidylyltransferase OS=Dictyostelium discoideum GN=pctA PE=1 SV=1
ko00564	Glycerophospholipid metabolism	comp60777_c0	aqc-miR172b_1ss21TG	sp|P73548|CDSA_SYNY3 Phosphatidate cytidylyltransferase OS=Synechocystis sp. (strain PCC 6803 / Kazusa) GN=cdsA PE=3 SV=1
ko00564	Glycerophospholipid metabolism	comp28864_c0	ama-miR396-5p_1ss21TG	sp|Q41142|PLDA1_RICCO Phospholipase D alpha 1 OS=Ricinus communis GN=PLD1 PE=1 SV=1
ko00564	Glycerophospholipid metabolism	comp67742_c0	lja-miR167_R+1_1ss21GT	sp|Q9C5E5|DGK5_ARATH Diacylglycerol kinase 5 OS=Arabidopsis thaliana GN=DGK5 PE=2 SV=1
ko00564	Glycerophospholipid metabolism	comp192562_c0	nta-MIR6149a-p5_2ss18CT21TA	sp|Q55BZ4|PCY2_DICDI Ethanolamine-phosphate cytidylyltransferase OS=Dictyostelium discoideum GN=pctA PE=1 SV=1
ko00564	Glycerophospholipid metabolism	comp28864_c0	amg-miR396	sp|Q41142|PLDA1_RICCO Phospholipase D alpha 1 OS=Ricinus communis GN=PLD1 PE=1 SV=1
ko00564	Glycerophospholipid metabolism	comp67806_c0	cpa-miR164d	sp|Q550W1|CAPTC_DICDI Uncharacterized CDP-alcohol phosphatidyltransferase class-I family protein 3 OS=Dictyostelium discoideum GN=captC PE=2 SV=1
ko00564	Glycerophospholipid metabolism	comp62361_c0	hpe-miR166a	sp|Q55BZ4|PCY2_DICDI Ethanolamine-phosphate cytidylyltransferase OS=Dictyostelium discoideum GN=pctA PE=1 SV=1
ko00564	Glycerophospholipid metabolism	comp60224_c0	ppe-miR172a-5p_1ss21GA	sp|Q41142|PLDA1_RICCO Phospholipase D alpha 1 OS=Ricinus communis GN=PLD1 PE=1 SV=1
ko00564	Glycerophospholipid metabolism	comp57579_c0	ama-miR396-5p	-
ko00564	Glycerophospholipid metabolism	comp28864_c0	ama-miR396-5p	sp|Q41142|PLDA1_RICCO Phospholipase D alpha 1 OS=Ricinus communis GN=PLD1 PE=1 SV=1
ko00564	Glycerophospholipid metabolism	comp65554_c0	ama-miR396-5p	-
ko00564	Glycerophospholipid metabolism	comp65554_c0	col-miRn-5p-17637_256	-
ko00564	Glycerophospholipid metabolism	comp57394_c0	col-miRn-3p-163119_21	sp|Q9LRZ5|PLDP1_ARATH Phospholipase D p1 OS=Arabidopsis thaliana GN=PLDP1 PE=2 SV=1
ko00564	Glycerophospholipid metabolism	comp60224_c0	aqc-MIR172b-p3_1ss9TC	sp|Q41142|PLDA1_RICCO Phospholipase D alpha 1 OS=Ricinus communis GN=PLD1 PE=1 SV=1
ko00564	Glycerophospholipid metabolism	comp53320_c0	mtr-MIR2592bj-p3_2ss12TC19AT_1	sp|Q9C5E5|DGK5_ARATH Diacylglycerol kinase 5 OS=Arabidopsis thaliana GN=DGK5 PE=2 SV=1
ko00564	Glycerophospholipid metabolism	comp64140_c0	col-miRn-3p-150062_24	sp|Q9XFW4|LPAT2_BRANA 1-acyl-sn-glycerol-3-phosphate acyltransferase 2 OS=Brassica napus GN=LPAT2 PE=2 SV=1
ko00564	Glycerophospholipid metabolism	comp222009_c0	ptc-miR1448_L+1R+1	sp|Q9C5Y0|PLDD1_ARATH Phospholipase D delta OS=Arabidopsis thaliana GN=PLDDELTA PE=1 SV=2
ko00564	Glycerophospholipid metabolism	comp904397_c0	rco-miR167a_R+1	sp|Q9LRZ5|PLDP1_ARATH Phospholipase D p1 OS=Arabidopsis thaliana GN=PLDP1 PE=2 SV=1
ko00565	Ether lipid metabolism	comp55086_c0	col-miRn-3p-16403_272	sp|Q9LRZ5|PLDP1_ARATH Phospholipase D p1 OS=Arabidopsis thaliana GN=PLDP1 PE=2 SV=1
ko00565	Ether lipid metabolism	comp67188_c0	ppe-miR399b_L-2R+2	sp|Q9C5Y0|PLDD1_ARATH Phospholipase D delta OS=Arabidopsis thaliana GN=PLDDELTA PE=1 SV=2
ko00565	Ether lipid metabolism	comp56789_c0	crt-miR168_L-2	sp|Q9XG80|PLA21_ORYSJ Probable phospholipase A2 homolog 1 OS=Oryza sativa subsp. japonica GN=PLA2-I PE=2 SV=1
ko00565	Ether lipid metabolism	comp55086_c0	crt-miR168_L-2	sp|Q9LRZ5|PLDP1_ARATH Phospholipase D p1 OS=Arabidopsis thaliana GN=PLDP1 PE=2 SV=1
ko00565	Ether lipid metabolism	comp57146_c0	hbr-MIR159b-p5_1ss10GT	sp|Q9SX31|PERK9_ARATH Proline-rich receptor-like protein kinase PERK9 OS=Arabidopsis thaliana GN=PERK9 PE=2 SV=1
ko00565	Ether lipid metabolism	comp67806_c0	pvu-miR159a.1	sp|Q550W1|CAPTC_DICDI Uncharacterized CDP-alcohol phosphatidyltransferase class-I family protein 3 OS=Dictyostelium discoideum GN=captC PE=2 SV=1
ko00565	Ether lipid metabolism	comp57394_c0	aqc-miR169c_R+1_1ss20GA	sp|Q9LRZ5|PLDP1_ARATH Phospholipase D p1 OS=Arabidopsis thaliana GN=PLDP1 PE=2 SV=1
ko00565	Ether lipid metabolism	comp65554_c0	col-miRn-5p-68355_69	-
ko00565	Ether lipid metabolism	comp65554_c0	col-miRn-5p-166889_20	-
ko00565	Ether lipid metabolism	comp67188_c0	stu-MIR5303j-p5_2ss10GT17CT	sp|Q9C5Y0|PLDD1_ARATH Phospholipase D delta OS=Arabidopsis thaliana GN=PLDDELTA PE=1 SV=2
ko00565	Ether lipid metabolism	comp67188_c0	stu-MIR5303j-p5_2ss10GT17CT	sp|Q9C5Y0|PLDD1_ARATH Phospholipase D delta OS=Arabidopsis thaliana GN=PLDDELTA PE=1 SV=2
ko00565	Ether lipid metabolism	comp222009_c0	stu-MIR5303j-p5_2ss10GT17CT	sp|Q9C5Y0|PLDD1_ARATH Phospholipase D delta OS=Arabidopsis thaliana GN=PLDDELTA PE=1 SV=2
ko00565	Ether lipid metabolism	comp48862_c0	ghr-MIR7499-p3_2ss10GC17CG	sp|P86387|PLDA1_CARPA Phospholipase D alpha 1 OS=Carica papaya GN=PLD1 PE=1 SV=1
ko00565	Ether lipid metabolism	comp62091_c0	col-miRn-5p-32910_149	sp|P93733|PLDB1_ARATH Phospholipase D beta 1 OS=Arabidopsis thaliana GN=PLDBETA1 PE=2 SV=4
ko00565	Ether lipid metabolism	comp67188_c0	col-miRn-5p-32910_149	sp|Q9C5Y0|PLDD1_ARATH Phospholipase D delta OS=Arabidopsis thaliana GN=PLDDELTA PE=1 SV=2
ko00565	Ether lipid metabolism	comp42438_c0	bol-miR398a-3p	sp|Q43270|PLDA1_MAIZE Phospholipase D alpha 1 OS=Zea mays GN=PLD1 PE=2 SV=1
ko00565	Ether lipid metabolism	comp28864_c0	ama-miR396-5p_1ss21TG	sp|Q41142|PLDA1_RICCO Phospholipase D alpha 1 OS=Ricinus communis GN=PLD1 PE=1 SV=1
ko00565	Ether lipid metabolism	comp28864_c0	amg-miR396	sp|Q41142|PLDA1_RICCO Phospholipase D alpha 1 OS=Ricinus communis GN=PLD1 PE=1 SV=1
ko00565	Ether lipid metabolism	comp67806_c0	cpa-miR164d	sp|Q550W1|CAPTC_DICDI Uncharacterized CDP-alcohol phosphatidyltransferase class-I family protein 3 OS=Dictyostelium discoideum GN=captC PE=2 SV=1
ko00565	Ether lipid metabolism	comp60224_c0	ppe-miR172a-5p_1ss21GA	sp|Q41142|PLDA1_RICCO Phospholipase D alpha 1 OS=Ricinus communis GN=PLD1 PE=1 SV=1
ko00565	Ether lipid metabolism	comp57579_c0	ama-miR396-5p	-
ko00565	Ether lipid metabolism	comp28864_c0	ama-miR396-5p	sp|Q41142|PLDA1_RICCO Phospholipase D alpha 1 OS=Ricinus communis GN=PLD1 PE=1 SV=1
ko00565	Ether lipid metabolism	comp65554_c0	ama-miR396-5p	-
ko00565	Ether lipid metabolism	comp65554_c0	col-miRn-5p-17637_256	-
ko00565	Ether lipid metabolism	comp57394_c0	col-miRn-3p-163119_21	sp|Q9LRZ5|PLDP1_ARATH Phospholipase D p1 OS=Arabidopsis thaliana GN=PLDP1 PE=2 SV=1
ko00565	Ether lipid metabolism	comp60224_c0	aqc-MIR172b-p3_1ss9TC	sp|Q41142|PLDA1_RICCO Phospholipase D alpha 1 OS=Ricinus communis GN=PLD1 PE=1 SV=1
ko00565	Ether lipid metabolism	comp222009_c0	ptc-miR1448_L+1R+1	sp|Q9C5Y0|PLDD1_ARATH Phospholipase D delta OS=Arabidopsis thaliana GN=PLDDELTA PE=1 SV=2
ko00565	Ether lipid metabolism	comp904397_c0	rco-miR167a_R+1	sp|Q9LRZ5|PLDP1_ARATH Phospholipase D p1 OS=Arabidopsis thaliana GN=PLDP1 PE=2 SV=1
ko00590	Arachidonic acid metabolism	comp14293_c0	ptc-miR156a_R+2	sp|Q8VYW6|GAGT1_ARATH Gamma-glutamyltranspeptidase 1 OS=Arabidopsis thaliana GN=GGT1 PE=2 SV=1
ko00590	Arachidonic acid metabolism	comp24599_c0	ppe-miR399b_L-2R+2	sp|O48921|C97B2_SOYBN Cytochrome P450 97B2, chloroplastic OS=Glycine max GN=CYP97B2 PE=2 SV=1
ko00590	Arachidonic acid metabolism	comp56789_c0	crt-miR168_L-2	sp|Q9XG80|PLA21_ORYSJ Probable phospholipase A2 homolog 1 OS=Oryza sativa subsp. japonica GN=PLA2-I PE=2 SV=1
ko00590	Arachidonic acid metabolism	comp14293_c0	mes-miR156a	sp|Q8VYW6|GAGT1_ARATH Gamma-glutamyltranspeptidase 1 OS=Arabidopsis thaliana GN=GGT1 PE=2 SV=1
ko00590	Arachidonic acid metabolism	comp14293_c0	han-miR156a_L+1	sp|Q8VYW6|GAGT1_ARATH Gamma-glutamyltranspeptidase 1 OS=Arabidopsis thaliana GN=GGT1 PE=2 SV=1
ko00590	Arachidonic acid metabolism	comp41843_c0	han-miR156a_L+1	sp|O48646|GPX6_ARATH Probable phospholipid hydroperoxide glutathione peroxidase 6, mitochondrial OS=Arabidopsis thaliana GN=GPX6 PE=2 SV=2
ko00590	Arachidonic acid metabolism	comp67696_c0	ppe-miR1511-3p_L+1R-4	sp|Q9M0G0|GAGT3_ARATH Gamma-glutamyltranspeptidase 3 OS=Arabidopsis thaliana GN=GGT3 PE=2 SV=1
ko00590	Arachidonic acid metabolism	comp67696_c0	hpe-miR162a_L-2	sp|Q9M0G0|GAGT3_ARATH Gamma-glutamyltranspeptidase 3 OS=Arabidopsis thaliana GN=GGT3 PE=2 SV=1
ko00590	Arachidonic acid metabolism	comp67696_c0	hpe-miR162a_L-2	sp|Q9M0G0|GAGT3_ARATH Gamma-glutamyltranspeptidase 3 OS=Arabidopsis thaliana GN=GGT3 PE=2 SV=1
ko00590	Arachidonic acid metabolism	comp24599_c0	stu-MIR5303j-p5_2ss10GT17CT	sp|O48921|C97B2_SOYBN Cytochrome P450 97B2, chloroplastic OS=Glycine max GN=CYP97B2 PE=2 SV=1
ko00590	Arachidonic acid metabolism	comp41843_c0	stu-MIR5303j-p5_2ss10GT17CT	sp|O48646|GPX6_ARATH Probable phospholipid hydroperoxide glutathione peroxidase 6, mitochondrial OS=Arabidopsis thaliana GN=GPX6 PE=2 SV=2
ko00590	Arachidonic acid metabolism	comp67696_c0	rgl-miR5139_L-1	sp|Q9M0G0|GAGT3_ARATH Gamma-glutamyltranspeptidase 3 OS=Arabidopsis thaliana GN=GGT3 PE=2 SV=1
ko00590	Arachidonic acid metabolism	comp41843_c0	ghr-MIR7499-p3_2ss10GC17CG	sp|O48646|GPX6_ARATH Probable phospholipid hydroperoxide glutathione peroxidase 6, mitochondrial OS=Arabidopsis thaliana GN=GPX6 PE=2 SV=2
ko00590	Arachidonic acid metabolism	comp67696_c0	aly-miR166g-5p_2ss10TG20GT	sp|Q9M0G0|GAGT3_ARATH Gamma-glutamyltranspeptidase 3 OS=Arabidopsis thaliana GN=GGT3 PE=2 SV=1
ko00590	Arachidonic acid metabolism	comp63272_c0	ptc-miR172b-5p	sp|O48646|GPX6_ARATH Probable phospholipid hydroperoxide glutathione peroxidase 6, mitochondrial OS=Arabidopsis thaliana GN=GPX6 PE=2 SV=2
ko00590	Arachidonic acid metabolism	comp66185_c0	aqc-miR399	sp|O04922|GPX2_ARATH Probable glutathione peroxidase 2 OS=Arabidopsis thaliana GN=GPX2 PE=1 SV=1
ko00590	Arachidonic acid metabolism	comp24599_c0	ssl-miR828	sp|O48921|C97B2_SOYBN Cytochrome P450 97B2, chloroplastic OS=Glycine max GN=CYP97B2 PE=2 SV=1
ko00590	Arachidonic acid metabolism	comp49755_c0	rco-miR156e_L+1R-1	sp|P24527|LKHA4_MOUSE Leukotriene A-4 hydrolase OS=Mus musculus GN=Lta4h PE=1 SV=4
ko00590	Arachidonic acid metabolism	comp63272_c0	ppe-miR172a-5p_1ss21GA	sp|O48646|GPX6_ARATH Probable phospholipid hydroperoxide glutathione peroxidase 6, mitochondrial OS=Arabidopsis thaliana GN=GPX6 PE=2 SV=2
ko00590	Arachidonic acid metabolism	comp61772_c0	ppe-miR172a-5p_1ss21GA	sp|Q7S785|LKHA4_NEUCR Leukotriene A-4 hydrolase homolog OS=Neurospora crassa (strain ATCC 24698 / 74-OR23-1A / CBS 708.71 / DSM 1257 / FGSC 987) GN=NCU06732 PE=3 SV=1
ko00590	Arachidonic acid metabolism	comp67696_c0	cca-miR396a-3p_2ss7GT21AG	sp|Q9M0G0|GAGT3_ARATH Gamma-glutamyltranspeptidase 3 OS=Arabidopsis thaliana GN=GGT3 PE=2 SV=1
ko00590	Arachidonic acid metabolism	comp24599_c0	hbr-MIR159b-p3_1ss20GA	sp|O48921|C97B2_SOYBN Cytochrome P450 97B2, chloroplastic OS=Glycine max GN=CYP97B2 PE=2 SV=1
ko00600	Sphingolipid metabolism	comp67556_c0	col-miRn-3p-16403_272	sp|P48980|BGAL_SOLLC Beta-galactosidase OS=Solanum lycopersicum PE=1 SV=1
ko00600	Sphingolipid metabolism	comp68384_c0	col-miRn-3p-16403_272	sp|Q9SCV9|BGAL3_ARATH Beta-galactosidase 3 OS=Arabidopsis thaliana GN=BGAL3 PE=1 SV=1
ko00600	Sphingolipid metabolism	comp66377_c0	col-miRn-3p-253727_10	sp|P06864|BGA2_ECOLI Evolved beta-galactosidase subunit alpha OS=Escherichia coli (strain K12) GN=ebgA PE=1 SV=4
ko00600	Sphingolipid metabolism	comp66377_c0	col-miRn-3p-253727_10	sp|P06864|BGA2_ECOLI Evolved beta-galactosidase subunit alpha OS=Escherichia coli (strain K12) GN=ebgA PE=1 SV=4
ko00600	Sphingolipid metabolism	comp68384_c0	col-miRn-3p-3803_812	sp|Q9SCV9|BGAL3_ARATH Beta-galactosidase 3 OS=Arabidopsis thaliana GN=BGAL3 PE=1 SV=1
ko00600	Sphingolipid metabolism	comp62889_c0	csi-miR162-5p_L-1_1ss5GC	sp|P06864|BGA2_ECOLI Evolved beta-galactosidase subunit alpha OS=Escherichia coli (strain K12) GN=ebgA PE=1 SV=4
ko00600	Sphingolipid metabolism	comp53255_c0	ppe-miR399b_L-2R+2	sp|Q9C509|SGPL_ARATH Sphingosine-1-phosphate lyase OS=Arabidopsis thaliana GN=At1g27980 PE=2 SV=1
ko00600	Sphingolipid metabolism	comp67998_c0	crt-miR168_L-2	sp|P37330|MASZ_ECOLI Malate synthase G OS=Escherichia coli (strain K12) GN=glcB PE=1 SV=3
ko00600	Sphingolipid metabolism	comp67693_c1	aly-miR169b-3p_2ss12C-15CT	sp|P00573|RPOL_BPT7 DNA-directed RNA polymerase OS=Enterobacteria phage T7 GN=1 PE=1 SV=2
ko00600	Sphingolipid metabolism	comp60160_c0	aly-miR169b-3p_2ss12C-15CT	sp|P49676|BGAL_BRAOL Beta-galactosidase OS=Brassica oleracea PE=2 SV=1
ko00600	Sphingolipid metabolism	comp67693_c0	aly-miR167b-3p_1ss13AG	sp|P00573|RPOL_BPT7 DNA-directed RNA polymerase OS=Enterobacteria phage T7 GN=1 PE=1 SV=2
ko00600	Sphingolipid metabolism	comp68455_c0	mtr-miR156a_L+1R-1_1ss4AC	sp|Q9SCV3|BGAL9_ARATH Beta-galactosidase 9 OS=Arabidopsis thaliana GN=BGAL9 PE=2 SV=1
ko00600	Sphingolipid metabolism	comp201543_c0	htu-miR393a_R-1_1ss21CT	sp|A5F5U6|BGAL_VIBC3 Beta-galactosidase OS=Vibrio cholerae serotype O1 (strain ATCC 39541 / Ogawa 395 / O395) GN=lacZ PE=3 SV=2
ko00600	Sphingolipid metabolism	comp67693_c0	ppe-miR397_1ss10GC	sp|P00573|RPOL_BPT7 DNA-directed RNA polymerase OS=Enterobacteria phage T7 GN=1 PE=1 SV=2
ko00600	Sphingolipid metabolism	comp59406_c0	ssl-miR171b	sp|Q93Z24|BGA17_ARATH Beta-galactosidase 17 OS=Arabidopsis thaliana GN=BGAL17 PE=2 SV=1
ko00600	Sphingolipid metabolism	comp67693_c1	ppe-MIR482a-p3_3ss12TA21AT22AC	sp|P00573|RPOL_BPT7 DNA-directed RNA polymerase OS=Enterobacteria phage T7 GN=1 PE=1 SV=2
ko00600	Sphingolipid metabolism	comp68180_c0	gra-MIR482d-p3_2ss13CT17CT	sp|P48980|BGAL_SOLLC Beta-galactosidase OS=Solanum lycopersicum PE=1 SV=1
ko00600	Sphingolipid metabolism	comp67998_c0	rco-miR171c	sp|P37330|MASZ_ECOLI Malate synthase G OS=Escherichia coli (strain K12) GN=glcB PE=1 SV=3
ko00600	Sphingolipid metabolism	comp67693_c1	rco-miR171c	sp|P00573|RPOL_BPT7 DNA-directed RNA polymerase OS=Enterobacteria phage T7 GN=1 PE=1 SV=2
ko00600	Sphingolipid metabolism	comp201543_c0	cpa-miR393_R-1	sp|A5F5U6|BGAL_VIBC3 Beta-galactosidase OS=Vibrio cholerae serotype O1 (strain ATCC 39541 / Ogawa 395 / O395) GN=lacZ PE=3 SV=2
ko00600	Sphingolipid metabolism	comp66377_c0	cpa-miR393_R-1	sp|P06864|BGA2_ECOLI Evolved beta-galactosidase subunit alpha OS=Escherichia coli (strain K12) GN=ebgA PE=1 SV=4
ko00600	Sphingolipid metabolism	comp66377_c0	ccl-miR167a	sp|P06864|BGA2_ECOLI Evolved beta-galactosidase subunit alpha OS=Escherichia coli (strain K12) GN=ebgA PE=1 SV=4
ko00600	Sphingolipid metabolism	comp62889_c0	tcc-miR162	sp|P06864|BGA2_ECOLI Evolved beta-galactosidase subunit alpha OS=Escherichia coli (strain K12) GN=ebgA PE=1 SV=4
ko00600	Sphingolipid metabolism	comp62889_c0	tcc-miR162	sp|P06864|BGA2_ECOLI Evolved beta-galactosidase subunit alpha OS=Escherichia coli (strain K12) GN=ebgA PE=1 SV=4
ko00600	Sphingolipid metabolism	comp58955_c0	ppe-miR1511-3p_L+1R-4	sp|Q8L7L1|SPHK1_ARATH Sphingosine kinase 1 OS=Arabidopsis thaliana GN=SPHK1 PE=1 SV=1
ko00600	Sphingolipid metabolism	comp55039_c0	aly-miR399f-3p	sp|Q2R3K3|LCB2A_ORYSJ Long chain base biosynthesis protein 2a OS=Oryza sativa subsp. japonica GN=Os11g0516000 PE=2 SV=1
ko00600	Sphingolipid metabolism	comp68180_c0	hpe-miR162a_L-2	sp|P48980|BGAL_SOLLC Beta-galactosidase OS=Solanum lycopersicum PE=1 SV=1
ko00600	Sphingolipid metabolism	comp299341_c0	hpe-miR162a_L-2	sp|Q9SCW1|BGAL1_ARATH Beta-galactosidase 1 OS=Arabidopsis thaliana GN=BGAL1 PE=1 SV=1
ko00600	Sphingolipid metabolism	comp67693_c1	hpe-miR162a_L-2	sp|P00573|RPOL_BPT7 DNA-directed RNA polymerase OS=Enterobacteria phage T7 GN=1 PE=1 SV=2
ko00600	Sphingolipid metabolism	comp66377_c0	hpe-miR162a_L-2	sp|P06864|BGA2_ECOLI Evolved beta-galactosidase subunit alpha OS=Escherichia coli (strain K12) GN=ebgA PE=1 SV=4
ko00600	Sphingolipid metabolism	comp67693_c1	col-miRn-3p-152189_23	sp|P00573|RPOL_BPT7 DNA-directed RNA polymerase OS=Enterobacteria phage T7 GN=1 PE=1 SV=2
ko00600	Sphingolipid metabolism	comp67556_c0	hpe-miR166a_1ss5AC	sp|P48980|BGAL_SOLLC Beta-galactosidase OS=Solanum lycopersicum PE=1 SV=1
ko00600	Sphingolipid metabolism	comp66377_c0	dpr-miR167a_R+1	sp|P06864|BGA2_ECOLI Evolved beta-galactosidase subunit alpha OS=Escherichia coli (strain K12) GN=ebgA PE=1 SV=4
ko00600	Sphingolipid metabolism	comp364491_c0	stu-MIR5303j-p5_2ss10GT17CT	sp|Q9MAJ7|BGAL5_ARATH Beta-galactosidase 5 OS=Arabidopsis thaliana GN=BGAL5 PE=2 SV=1
ko00600	Sphingolipid metabolism	comp67998_c0	stu-MIR5303j-p5_2ss10GT17CT	sp|P37330|MASZ_ECOLI Malate synthase G OS=Escherichia coli (strain K12) GN=glcB PE=1 SV=3
ko00600	Sphingolipid metabolism	comp55039_c0	stu-MIR5303j-p5_2ss10GT17CT	sp|Q2R3K3|LCB2A_ORYSJ Long chain base biosynthesis protein 2a OS=Oryza sativa subsp. japonica GN=Os11g0516000 PE=2 SV=1
ko00600	Sphingolipid metabolism	comp55186_c0	stu-MIR5303j-p5_2ss10GT17CT	sp|Q9C509|SGPL_ARATH Sphingosine-1-phosphate lyase OS=Arabidopsis thaliana GN=At1g27980 PE=2 SV=1
ko00600	Sphingolipid metabolism	comp59406_c0	stu-MIR5303j-p5_2ss10GT17CT	sp|Q93Z24|BGA17_ARATH Beta-galactosidase 17 OS=Arabidopsis thaliana GN=BGAL17 PE=2 SV=1
ko00600	Sphingolipid metabolism	comp67998_c0	ctr-miR164_R-1	sp|P37330|MASZ_ECOLI Malate synthase G OS=Escherichia coli (strain K12) GN=glcB PE=1 SV=3
ko00600	Sphingolipid metabolism	comp23621_c0	csi-miR166e-5p_L-1R+1_1ss21GA	sp|Q9LFA6|BGAL2_ARATH Beta-galactosidase 2 OS=Arabidopsis thaliana GN=BGAL2 PE=2 SV=2
ko00600	Sphingolipid metabolism	comp67998_c0	gma-MIR828a-p3_2ss3AC18CA	sp|P37330|MASZ_ECOLI Malate synthase G OS=Escherichia coli (strain K12) GN=glcB PE=1 SV=3
ko00600	Sphingolipid metabolism	comp67693_c1	gma-MIR828a-p3_2ss3AC18CA	sp|P00573|RPOL_BPT7 DNA-directed RNA polymerase OS=Enterobacteria phage T7 GN=1 PE=1 SV=2
ko00600	Sphingolipid metabolism	comp62889_c0	gma-MIR828a-p3_2ss3AC18CA	sp|P06864|BGA2_ECOLI Evolved beta-galactosidase subunit alpha OS=Escherichia coli (strain K12) GN=ebgA PE=1 SV=4
ko00600	Sphingolipid metabolism	comp67693_c0	mtr-MIR2592bj-p3_2ss12TC19AT_2	sp|P00573|RPOL_BPT7 DNA-directed RNA polymerase OS=Enterobacteria phage T7 GN=1 PE=1 SV=2
ko00600	Sphingolipid metabolism	comp57353_c0	ath-miR858b	sp|Q9SCV4|BGAL8_ARATH Beta-galactosidase 8 OS=Arabidopsis thaliana GN=BGAL8 PE=2 SV=2
ko00600	Sphingolipid metabolism	comp67556_c0	ath-miR858b	sp|P48980|BGAL_SOLLC Beta-galactosidase OS=Solanum lycopersicum PE=1 SV=1
ko00600	Sphingolipid metabolism	comp66365_c0	ath-miR858b	sp|Q5N8X6|BGAL3_ORYSJ Beta-galactosidase 3 OS=Oryza sativa subsp. japonica GN=Os01g0875500 PE=2 SV=1
ko00600	Sphingolipid metabolism	comp58955_c0	rgl-miR5139_L-1	sp|Q8L7L1|SPHK1_ARATH Sphingosine kinase 1 OS=Arabidopsis thaliana GN=SPHK1 PE=1 SV=1
ko00600	Sphingolipid metabolism	comp66377_c0	ama-miR156_L+5R-2	sp|P06864|BGA2_ECOLI Evolved beta-galactosidase subunit alpha OS=Escherichia coli (strain K12) GN=ebgA PE=1 SV=4
ko00600	Sphingolipid metabolism	comp62889_c0	ghr-MIR7499-p3_2ss10GC17CG	sp|P06864|BGA2_ECOLI Evolved beta-galactosidase subunit alpha OS=Escherichia coli (strain K12) GN=ebgA PE=1 SV=4
ko00600	Sphingolipid metabolism	comp66377_c0	bol-miR398a-3p	sp|P06864|BGA2_ECOLI Evolved beta-galactosidase subunit alpha OS=Escherichia coli (strain K12) GN=ebgA PE=1 SV=4
ko00600	Sphingolipid metabolism	comp23621_c0	csi-miR166e-5p	sp|Q9LFA6|BGAL2_ARATH Beta-galactosidase 2 OS=Arabidopsis thaliana GN=BGAL2 PE=2 SV=2
ko00600	Sphingolipid metabolism	comp62889_c0	csi-miR166e-5p	sp|P06864|BGA2_ECOLI Evolved beta-galactosidase subunit alpha OS=Escherichia coli (strain K12) GN=ebgA PE=1 SV=4
ko00600	Sphingolipid metabolism	comp201543_c0	gma-miR393a	sp|A5F5U6|BGAL_VIBC3 Beta-galactosidase OS=Vibrio cholerae serotype O1 (strain ATCC 39541 / Ogawa 395 / O395) GN=lacZ PE=3 SV=2
ko00600	Sphingolipid metabolism	comp66377_c0	gma-miR393a	sp|P06864|BGA2_ECOLI Evolved beta-galactosidase subunit alpha OS=Escherichia coli (strain K12) GN=ebgA PE=1 SV=4
ko00600	Sphingolipid metabolism	comp67998_c0	tcc-miR403a	sp|P37330|MASZ_ECOLI Malate synthase G OS=Escherichia coli (strain K12) GN=glcB PE=1 SV=3
ko00600	Sphingolipid metabolism	comp67470_c0	tcc-miR403a	sp|Q42656|AGAL_COFAR Alpha-galactosidase OS=Coffea arabica PE=1 SV=1
ko00600	Sphingolipid metabolism	comp67998_c0	aqc-miR172b_1ss21TG	sp|P37330|MASZ_ECOLI Malate synthase G OS=Escherichia coli (strain K12) GN=glcB PE=1 SV=3
ko00600	Sphingolipid metabolism	comp44887_c0	mdm-miR477b_1ss20GC	-
ko00600	Sphingolipid metabolism	comp67693_c1	mdm-MIR167c-p3_1ss6AG	sp|P00573|RPOL_BPT7 DNA-directed RNA polymerase OS=Enterobacteria phage T7 GN=1 PE=1 SV=2
ko00600	Sphingolipid metabolism	comp67693_c1	mdm-MIR167c-p3_1ss6AG	sp|P00573|RPOL_BPT7 DNA-directed RNA polymerase OS=Enterobacteria phage T7 GN=1 PE=1 SV=2
ko00600	Sphingolipid metabolism	comp67693_c0	nta-MIR6149a-p5_2ss18CT21TA	sp|P00573|RPOL_BPT7 DNA-directed RNA polymerase OS=Enterobacteria phage T7 GN=1 PE=1 SV=2
ko00600	Sphingolipid metabolism	comp62889_c0	aly-miR171c-5p_1ss5AG	sp|P06864|BGA2_ECOLI Evolved beta-galactosidase subunit alpha OS=Escherichia coli (strain K12) GN=ebgA PE=1 SV=4
ko00600	Sphingolipid metabolism	comp67998_c0	cpa-miR164d	sp|P37330|MASZ_ECOLI Malate synthase G OS=Escherichia coli (strain K12) GN=glcB PE=1 SV=3
ko00600	Sphingolipid metabolism	comp62889_c0	cpa-miR164d	sp|P06864|BGA2_ECOLI Evolved beta-galactosidase subunit alpha OS=Escherichia coli (strain K12) GN=ebgA PE=1 SV=4
ko00600	Sphingolipid metabolism	comp62889_c0	cpa-miR164d	sp|P06864|BGA2_ECOLI Evolved beta-galactosidase subunit alpha OS=Escherichia coli (strain K12) GN=ebgA PE=1 SV=4
ko00600	Sphingolipid metabolism	comp67556_c0	hpe-miR166a	sp|P48980|BGAL_SOLLC Beta-galactosidase OS=Solanum lycopersicum PE=1 SV=1
ko00600	Sphingolipid metabolism	comp67693_c0	lja-miR171c	sp|P00573|RPOL_BPT7 DNA-directed RNA polymerase OS=Enterobacteria phage T7 GN=1 PE=1 SV=2
ko00600	Sphingolipid metabolism	comp68455_c0	gma-miR319a	sp|Q9SCV3|BGAL9_ARATH Beta-galactosidase 9 OS=Arabidopsis thaliana GN=BGAL9 PE=2 SV=1
ko00600	Sphingolipid metabolism	comp67998_c0	ama-miR396-3p_L-2R+2	sp|P37330|MASZ_ECOLI Malate synthase G OS=Escherichia coli (strain K12) GN=glcB PE=1 SV=3
ko00600	Sphingolipid metabolism	comp67998_c0	cpa-miR164a	sp|P37330|MASZ_ECOLI Malate synthase G OS=Escherichia coli (strain K12) GN=glcB PE=1 SV=3
ko00600	Sphingolipid metabolism	comp62889_c0	aqc-MIR172b-p3_1ss9TC	sp|P06864|BGA2_ECOLI Evolved beta-galactosidase subunit alpha OS=Escherichia coli (strain K12) GN=ebgA PE=1 SV=4
ko00600	Sphingolipid metabolism	comp67693_c0	sly-miR164a-3p_2ss9TC12TC	sp|P00573|RPOL_BPT7 DNA-directed RNA polymerase OS=Enterobacteria phage T7 GN=1 PE=1 SV=2
ko00600	Sphingolipid metabolism	comp65824_c0	cca-miR396a-3p_2ss7GT21AG	sp|Q10RB4|BGAL5_ORYSJ Beta-galactosidase 5 OS=Oryza sativa subsp. japonica GN=Os03g0165400 PE=2 SV=1
ko00600	Sphingolipid metabolism	comp67998_c0	mtr-MIR2592bj-p3_2ss12TC19AT_1	sp|P37330|MASZ_ECOLI Malate synthase G OS=Escherichia coli (strain K12) GN=glcB PE=1 SV=3
ko00600	Sphingolipid metabolism	comp67693_c0	mtr-MIR2592bj-p3_2ss12TC19AT_1	sp|P00573|RPOL_BPT7 DNA-directed RNA polymerase OS=Enterobacteria phage T7 GN=1 PE=1 SV=2
ko00600	Sphingolipid metabolism	comp67693_c1	vun-MIR482-p5_2ss17CT18TC	sp|P00573|RPOL_BPT7 DNA-directed RNA polymerase OS=Enterobacteria phage T7 GN=1 PE=1 SV=2
ko00600	Sphingolipid metabolism	comp67693_c0	col-miRn-3p-116669_34	sp|P00573|RPOL_BPT7 DNA-directed RNA polymerase OS=Enterobacteria phage T7 GN=1 PE=1 SV=2
ko00600	Sphingolipid metabolism	comp54682_c0	ptc-miR1448_L+1R+1	sp|P48980|BGAL_SOLLC Beta-galactosidase OS=Solanum lycopersicum PE=1 SV=1
ko01040	Biosynthesis of unsaturated fatty acids	comp68523_c0	col-miRn-3p-253727_10	sp|P32152|FRVR_ECOLI Putative frv operon regulatory protein OS=Escherichia coli (strain K12) GN=frvR PE=3 SV=1
ko01040	Biosynthesis of unsaturated fatty acids	comp68523_c0	ath-MIR5645b-p3_2ss18TG20TA	sp|P32152|FRVR_ECOLI Putative frv operon regulatory protein OS=Escherichia coli (strain K12) GN=frvR PE=3 SV=1
ko01040	Biosynthesis of unsaturated fatty acids	comp67560_c0	ath-MIR5645b-p3_2ss18TG20TA	sp|P0ACE1|MBHM_ECO57 Hydrogenase-2 large chain OS=Escherichia coli O157:H7 GN=hybC PE=3 SV=2
ko01040	Biosynthesis of unsaturated fatty acids	comp66398_c0	csi-miR162-5p_L-1_1ss5GC	sp|P39342|YJGR_ECOLI Uncharacterized protein YjgR OS=Escherichia coli (strain K12) GN=yjgR PE=4 SV=1
ko01040	Biosynthesis of unsaturated fatty acids	comp66377_c1	csi-miR162-5p_L-1_1ss5GC	sp|P33224|AIDB_ECOLI Putative acyl-CoA dehydrogenase AidB OS=Escherichia coli (strain K12) GN=aidB PE=1 SV=3
ko01040	Biosynthesis of unsaturated fatty acids	comp66398_c0	crt-miR168_L-2	sp|P39342|YJGR_ECOLI Uncharacterized protein YjgR OS=Escherichia coli (strain K12) GN=yjgR PE=4 SV=1
ko01040	Biosynthesis of unsaturated fatty acids	comp64818_c0	crt-miR168_L-2	sp|P0CZ23|ACOX3_ARATH Acyl-coenzyme A oxidase 3, peroxisomal OS=Arabidopsis thaliana GN=ACX3 PE=1 SV=1
ko01040	Biosynthesis of unsaturated fatty acids	comp48800_c0	ptc-miR172a	sp|P22337|STAD_RICCO Acyl-[acyl-carrier-protein] desaturase, chloroplastic OS=Ricinus communis PE=1 SV=1
ko01040	Biosynthesis of unsaturated fatty acids	comp66398_c0	ptc-miR172a	sp|P39342|YJGR_ECOLI Uncharacterized protein YjgR OS=Escherichia coli (strain K12) GN=yjgR PE=4 SV=1
ko01040	Biosynthesis of unsaturated fatty acids	comp66377_c1	ptc-miR172a	sp|P33224|AIDB_ECOLI Putative acyl-CoA dehydrogenase AidB OS=Escherichia coli (strain K12) GN=aidB PE=1 SV=3
ko01040	Biosynthesis of unsaturated fatty acids	comp68523_c0	ptc-miR172a	sp|P32152|FRVR_ECOLI Putative frv operon regulatory protein OS=Escherichia coli (strain K12) GN=frvR PE=3 SV=1
ko01040	Biosynthesis of unsaturated fatty acids	comp67210_c0	sly-miR319c-5p_2ss8CT15CT	sp|P48631|FD6E2_SOYBN Omega-6 fatty acid desaturase, endoplasmic reticulum isozyme 2 OS=Glycine max GN=FAD2-2 PE=2 SV=1
ko01040	Biosynthesis of unsaturated fatty acids	comp66054_c0	sly-miR319c-5p_2ss8CT15CT	sp|P05804|BGLR_ECOLI Beta-glucuronidase OS=Escherichia coli (strain K12) GN=uidA PE=1 SV=2
ko01040	Biosynthesis of unsaturated fatty acids	comp66398_c0	csi-miR172c_L-1_1ss6TA	sp|P39342|YJGR_ECOLI Uncharacterized protein YjgR OS=Escherichia coli (strain K12) GN=yjgR PE=4 SV=1
ko01040	Biosynthesis of unsaturated fatty acids	comp67210_c0	csi-miR172c_L-1_1ss6TA	sp|P48631|FD6E2_SOYBN Omega-6 fatty acid desaturase, endoplasmic reticulum isozyme 2 OS=Glycine max GN=FAD2-2 PE=2 SV=1
ko01040	Biosynthesis of unsaturated fatty acids	comp66398_c0	aly-MIR394a-p3_2ss16CA17TG	sp|P39342|YJGR_ECOLI Uncharacterized protein YjgR OS=Escherichia coli (strain K12) GN=yjgR PE=4 SV=1
ko01040	Biosynthesis of unsaturated fatty acids	comp68523_c0	ppe-miR397_1ss10GC	sp|P32152|FRVR_ECOLI Putative frv operon regulatory protein OS=Escherichia coli (strain K12) GN=frvR PE=3 SV=1
ko01040	Biosynthesis of unsaturated fatty acids	comp68523_c0	ssl-miR171b	sp|P32152|FRVR_ECOLI Putative frv operon regulatory protein OS=Escherichia coli (strain K12) GN=frvR PE=3 SV=1
ko01040	Biosynthesis of unsaturated fatty acids	comp66398_c0	ssl-miR171b	sp|P39342|YJGR_ECOLI Uncharacterized protein YjgR OS=Escherichia coli (strain K12) GN=yjgR PE=4 SV=1
ko01040	Biosynthesis of unsaturated fatty acids	comp66377_c1	vvi-miR160c_L+1R-1	sp|P33224|AIDB_ECOLI Putative acyl-CoA dehydrogenase AidB OS=Escherichia coli (strain K12) GN=aidB PE=1 SV=3
ko01040	Biosynthesis of unsaturated fatty acids	comp63911_c0	mtr-miR156h-3p_1ss8AC	sp|Q9Z8P2|FABG_CHLPN 3-oxoacyl-[acyl-carrier-protein] reductase FabG OS=Chlamydia pneumoniae GN=fabG PE=3 SV=1
ko01040	Biosynthesis of unsaturated fatty acids	comp62593_c0	mtr-miR156h-3p_1ss8AC	sp|P48620|FAD3C_SESIN Omega-3 fatty acid desaturase, chloroplastic OS=Sesamum indicum GN=FAD7 PE=2 SV=1
ko01040	Biosynthesis of unsaturated fatty acids	comp67560_c0	ath-MIR5645e-p5_2ss18TG20TG	sp|P0ACE1|MBHM_ECO57 Hydrogenase-2 large chain OS=Escherichia coli O157:H7 GN=hybC PE=3 SV=2
ko01040	Biosynthesis of unsaturated fatty acids	comp63563_c0	ath-MIR5645e-p5_2ss18TG20TG	sp|P55138|YGCE_ECOLI Uncharacterized sugar kinase YgcE OS=Escherichia coli (strain K12) GN=ygcE PE=3 SV=2
ko01040	Biosynthesis of unsaturated fatty acids	comp44856_c0	col-miRn-5p-2142_1228	sp|Q46829|BGLA_ECOLI 6-phospho-beta-glucosidase BglA OS=Escherichia coli (strain K12) GN=bglA PE=1 SV=2
ko01040	Biosynthesis of unsaturated fatty acids	comp67560_c0	gma-MIR4393b-p3_2ss9AG18AG	sp|P0ACE1|MBHM_ECO57 Hydrogenase-2 large chain OS=Escherichia coli O157:H7 GN=hybC PE=3 SV=2
ko01040	Biosynthesis of unsaturated fatty acids	comp64597_c0	gra-MIR482d-p3_2ss13CT17CT	sp|O65202|ACOX1_ARATH Peroxisomal acyl-coenzyme A oxidase 1 OS=Arabidopsis thaliana GN=ACX1 PE=1 SV=1
ko01040	Biosynthesis of unsaturated fatty acids	comp66377_c1	gma-miR171m	sp|P33224|AIDB_ECOLI Putative acyl-CoA dehydrogenase AidB OS=Escherichia coli (strain K12) GN=aidB PE=1 SV=3
ko01040	Biosynthesis of unsaturated fatty acids	comp66377_c1	ccl-miR167a	sp|P33224|AIDB_ECOLI Putative acyl-CoA dehydrogenase AidB OS=Escherichia coli (strain K12) GN=aidB PE=1 SV=3
ko01040	Biosynthesis of unsaturated fatty acids	comp66377_c1	ptc-MIR482d-p3_2ss12AG21CT	sp|P33224|AIDB_ECOLI Putative acyl-CoA dehydrogenase AidB OS=Escherichia coli (strain K12) GN=aidB PE=1 SV=3
ko01040	Biosynthesis of unsaturated fatty acids	comp52199_c0	col-miRn-5p-315953_8	sp|P28645|STAD_SPIOL Acyl-[acyl-carrier-protein] desaturase, chloroplastic OS=Spinacia oleracea PE=2 SV=1
ko01040	Biosynthesis of unsaturated fatty acids	comp63077_c0	col-miRn-5p-315953_8	sp|P48620|FAD3C_SESIN Omega-3 fatty acid desaturase, chloroplastic OS=Sesamum indicum GN=FAD7 PE=2 SV=1
ko01040	Biosynthesis of unsaturated fatty acids	comp66054_c0	ath-miR390a-5p	sp|P05804|BGLR_ECOLI Beta-glucuronidase OS=Escherichia coli (strain K12) GN=uidA PE=1 SV=2
ko01040	Biosynthesis of unsaturated fatty acids	comp48800_c0	ppe-miR1511-3p_L+1R-4	sp|P22337|STAD_RICCO Acyl-[acyl-carrier-protein] desaturase, chloroplastic OS=Ricinus communis PE=1 SV=1
ko01040	Biosynthesis of unsaturated fatty acids	comp66398_c0	ppe-miR1511-3p_L+1R-4	sp|P39342|YJGR_ECOLI Uncharacterized protein YjgR OS=Escherichia coli (strain K12) GN=yjgR PE=4 SV=1
ko01040	Biosynthesis of unsaturated fatty acids	comp66054_c0	ppe-miR1511-3p_L+1R-4	sp|P05804|BGLR_ECOLI Beta-glucuronidase OS=Escherichia coli (strain K12) GN=uidA PE=1 SV=2
ko01040	Biosynthesis of unsaturated fatty acids	comp68523_c0	mdm-miR408a_L-1R+1	sp|P32152|FRVR_ECOLI Putative frv operon regulatory protein OS=Escherichia coli (strain K12) GN=frvR PE=3 SV=1
ko01040	Biosynthesis of unsaturated fatty acids	comp66398_c0	col-miRn-3p-99527_43	sp|P39342|YJGR_ECOLI Uncharacterized protein YjgR OS=Escherichia coli (strain K12) GN=yjgR PE=4 SV=1
ko01040	Biosynthesis of unsaturated fatty acids	comp66054_c0	tcc-miR390a	sp|P05804|BGLR_ECOLI Beta-glucuronidase OS=Escherichia coli (strain K12) GN=uidA PE=1 SV=2
ko01040	Biosynthesis of unsaturated fatty acids	comp68523_c0	hpe-miR162a_L-2	sp|P32152|FRVR_ECOLI Putative frv operon regulatory protein OS=Escherichia coli (strain K12) GN=frvR PE=3 SV=1
ko01040	Biosynthesis of unsaturated fatty acids	comp66377_c1	hpe-miR162a_L-2	sp|P33224|AIDB_ECOLI Putative acyl-CoA dehydrogenase AidB OS=Escherichia coli (strain K12) GN=aidB PE=1 SV=3
ko01040	Biosynthesis of unsaturated fatty acids	comp67560_c0	ath-MIR5645e-p3_1ss18TA	sp|P0ACE1|MBHM_ECO57 Hydrogenase-2 large chain OS=Escherichia coli O157:H7 GN=hybC PE=3 SV=2
ko01040	Biosynthesis of unsaturated fatty acids	comp44856_c0	ath-MIR5645e-p3_1ss18TA	sp|Q46829|BGLA_ECOLI 6-phospho-beta-glucosidase BglA OS=Escherichia coli (strain K12) GN=bglA PE=1 SV=2
ko01040	Biosynthesis of unsaturated fatty acids	comp48800_c0	col-miRn-3p-152189_23	sp|P22337|STAD_RICCO Acyl-[acyl-carrier-protein] desaturase, chloroplastic OS=Ricinus communis PE=1 SV=1
ko01040	Biosynthesis of unsaturated fatty acids	comp66377_c1	stu-MIR5303j-p5_2ss10GT17CT	sp|P33224|AIDB_ECOLI Putative acyl-CoA dehydrogenase AidB OS=Escherichia coli (strain K12) GN=aidB PE=1 SV=3
ko01040	Biosynthesis of unsaturated fatty acids	comp68523_c0	stu-MIR5303j-p5_2ss10GT17CT	sp|P32152|FRVR_ECOLI Putative frv operon regulatory protein OS=Escherichia coli (strain K12) GN=frvR PE=3 SV=1
ko01040	Biosynthesis of unsaturated fatty acids	comp66054_c0	ctr-miR164_R-1	sp|P05804|BGLR_ECOLI Beta-glucuronidase OS=Escherichia coli (strain K12) GN=uidA PE=1 SV=2
ko01040	Biosynthesis of unsaturated fatty acids	comp66377_c1	csi-miR166e-5p_L-1R+1_1ss21GA	sp|P33224|AIDB_ECOLI Putative acyl-CoA dehydrogenase AidB OS=Escherichia coli (strain K12) GN=aidB PE=1 SV=3
ko01040	Biosynthesis of unsaturated fatty acids	comp44856_c0	csi-miR166e-5p_L-1R+1_1ss21GA	sp|Q46829|BGLA_ECOLI 6-phospho-beta-glucosidase BglA OS=Escherichia coli (strain K12) GN=bglA PE=1 SV=2
ko01040	Biosynthesis of unsaturated fatty acids	comp66398_c0	gma-MIR828a-p3_2ss3AC18CA	sp|P39342|YJGR_ECOLI Uncharacterized protein YjgR OS=Escherichia coli (strain K12) GN=yjgR PE=4 SV=1
ko01040	Biosynthesis of unsaturated fatty acids	comp66398_c0	gma-MIR828a-p3_2ss3AC18CA	sp|P39342|YJGR_ECOLI Uncharacterized protein YjgR OS=Escherichia coli (strain K12) GN=yjgR PE=4 SV=1
ko01040	Biosynthesis of unsaturated fatty acids	comp66054_c0	gma-MIR828a-p3_2ss3AC18CA	sp|P05804|BGLR_ECOLI Beta-glucuronidase OS=Escherichia coli (strain K12) GN=uidA PE=1 SV=2
ko01040	Biosynthesis of unsaturated fatty acids	comp67560_c0	gma-MIR828a-p3_2ss3AC18CA	sp|P0ACE1|MBHM_ECO57 Hydrogenase-2 large chain OS=Escherichia coli O157:H7 GN=hybC PE=3 SV=2
ko01040	Biosynthesis of unsaturated fatty acids	comp68523_c0	gma-MIR828a-p3_2ss3AC18CA	sp|P32152|FRVR_ECOLI Putative frv operon regulatory protein OS=Escherichia coli (strain K12) GN=frvR PE=3 SV=1
ko01040	Biosynthesis of unsaturated fatty acids	comp68523_c0	gma-MIR828a-p3_2ss3AC18CA	sp|P32152|FRVR_ECOLI Putative frv operon regulatory protein OS=Escherichia coli (strain K12) GN=frvR PE=3 SV=1
ko01040	Biosynthesis of unsaturated fatty acids	comp63563_c0	gma-MIR828a-p3_2ss3AC18CA	sp|P55138|YGCE_ECOLI Uncharacterized sugar kinase YgcE OS=Escherichia coli (strain K12) GN=ygcE PE=3 SV=2
ko01040	Biosynthesis of unsaturated fatty acids	comp66377_c1	gma-MIR828a-p3_2ss3AC18CA	sp|P33224|AIDB_ECOLI Putative acyl-CoA dehydrogenase AidB OS=Escherichia coli (strain K12) GN=aidB PE=1 SV=3
ko01040	Biosynthesis of unsaturated fatty acids	comp67006_c0	mtr-MIR2592bj-p3_2ss12TC19AT_2	sp|Q84VY3|STAD6_ARATH Acyl-[acyl-carrier-protein] desaturase 6, chloroplastic OS=Arabidopsis thaliana GN=S-ACP-DES6 PE=2 SV=2
ko01040	Biosynthesis of unsaturated fatty acids	comp66377_c1	hbr-miR398_2ss9CT21GC	sp|P33224|AIDB_ECOLI Putative acyl-CoA dehydrogenase AidB OS=Escherichia coli (strain K12) GN=aidB PE=1 SV=3
ko01040	Biosynthesis of unsaturated fatty acids	comp68523_c0	ath-MIR5645b-p5_2ss18TG20TA	sp|P32152|FRVR_ECOLI Putative frv operon regulatory protein OS=Escherichia coli (strain K12) GN=frvR PE=3 SV=1
ko01040	Biosynthesis of unsaturated fatty acids	comp67560_c0	ath-MIR5645b-p5_2ss18TG20TA	sp|P0ACE1|MBHM_ECO57 Hydrogenase-2 large chain OS=Escherichia coli O157:H7 GN=hybC PE=3 SV=2
ko01040	Biosynthesis of unsaturated fatty acids	comp66398_c0	ath-miR858b	sp|P39342|YJGR_ECOLI Uncharacterized protein YjgR OS=Escherichia coli (strain K12) GN=yjgR PE=4 SV=1
ko01040	Biosynthesis of unsaturated fatty acids	comp48800_c0	rgl-miR5139_L-1	sp|P22337|STAD_RICCO Acyl-[acyl-carrier-protein] desaturase, chloroplastic OS=Ricinus communis PE=1 SV=1
ko01040	Biosynthesis of unsaturated fatty acids	comp66398_c0	rgl-miR5139_L-1	sp|P39342|YJGR_ECOLI Uncharacterized protein YjgR OS=Escherichia coli (strain K12) GN=yjgR PE=4 SV=1
ko01040	Biosynthesis of unsaturated fatty acids	comp66054_c0	rgl-miR5139_L-1	sp|P05804|BGLR_ECOLI Beta-glucuronidase OS=Escherichia coli (strain K12) GN=uidA PE=1 SV=2
ko01040	Biosynthesis of unsaturated fatty acids	comp67560_c0	ath-MIR5645e-p3_2ss18TG20TG_1	sp|P0ACE1|MBHM_ECO57 Hydrogenase-2 large chain OS=Escherichia coli O157:H7 GN=hybC PE=3 SV=2
ko01040	Biosynthesis of unsaturated fatty acids	comp63563_c0	ath-MIR5645e-p3_2ss18TG20TG_1	sp|P55138|YGCE_ECOLI Uncharacterized sugar kinase YgcE OS=Escherichia coli (strain K12) GN=ygcE PE=3 SV=2
ko01040	Biosynthesis of unsaturated fatty acids	comp61688_c0	ama-miR156_L+5R-2	sp|Q96329|ACOX4_ARATH Acyl-coenzyme A oxidase 4, peroxisomal OS=Arabidopsis thaliana GN=ACX4 PE=1 SV=1
ko01040	Biosynthesis of unsaturated fatty acids	comp68523_c0	gma-miR408a-3p_L-1R+1	sp|P32152|FRVR_ECOLI Putative frv operon regulatory protein OS=Escherichia coli (strain K12) GN=frvR PE=3 SV=1
ko01040	Biosynthesis of unsaturated fatty acids	comp66377_c1	ghr-MIR7499-p3_2ss10GC17CG	sp|P33224|AIDB_ECOLI Putative acyl-CoA dehydrogenase AidB OS=Escherichia coli (strain K12) GN=aidB PE=1 SV=3
ko01040	Biosynthesis of unsaturated fatty acids	comp66377_c1	ghr-MIR7499-p3_2ss10GC17CG	sp|P33224|AIDB_ECOLI Putative acyl-CoA dehydrogenase AidB OS=Escherichia coli (strain K12) GN=aidB PE=1 SV=3
ko01040	Biosynthesis of unsaturated fatty acids	comp66054_c0	col-miRn-5p-21064_221	sp|P05804|BGLR_ECOLI Beta-glucuronidase OS=Escherichia coli (strain K12) GN=uidA PE=1 SV=2
ko01040	Biosynthesis of unsaturated fatty acids	comp68523_c0	col-miRn-5p-32910_149	sp|P32152|FRVR_ECOLI Putative frv operon regulatory protein OS=Escherichia coli (strain K12) GN=frvR PE=3 SV=1
ko01040	Biosynthesis of unsaturated fatty acids	comp66054_c0	bol-miR398a-3p	sp|P05804|BGLR_ECOLI Beta-glucuronidase OS=Escherichia coli (strain K12) GN=uidA PE=1 SV=2
ko01040	Biosynthesis of unsaturated fatty acids	comp66377_c1	stu-miR482a-5p_2ss3AG12AC	sp|P33224|AIDB_ECOLI Putative acyl-CoA dehydrogenase AidB OS=Escherichia coli (strain K12) GN=aidB PE=1 SV=3
ko01040	Biosynthesis of unsaturated fatty acids	comp66377_c1	csi-miR166e-5p	sp|P33224|AIDB_ECOLI Putative acyl-CoA dehydrogenase AidB OS=Escherichia coli (strain K12) GN=aidB PE=1 SV=3
ko01040	Biosynthesis of unsaturated fatty acids	comp44856_c0	csi-miR166e-5p	sp|Q46829|BGLA_ECOLI 6-phospho-beta-glucosidase BglA OS=Escherichia coli (strain K12) GN=bglA PE=1 SV=2
ko01040	Biosynthesis of unsaturated fatty acids	comp67006_c0	csi-miR166e-5p	sp|Q84VY3|STAD6_ARATH Acyl-[acyl-carrier-protein] desaturase 6, chloroplastic OS=Arabidopsis thaliana GN=S-ACP-DES6 PE=2 SV=2
ko01040	Biosynthesis of unsaturated fatty acids	comp68523_c0	csi-miR166e-5p	sp|P32152|FRVR_ECOLI Putative frv operon regulatory protein OS=Escherichia coli (strain K12) GN=frvR PE=3 SV=1
ko01040	Biosynthesis of unsaturated fatty acids	comp44856_c0	aly-miR166g-5p_2ss10TG20GT	sp|Q46829|BGLA_ECOLI 6-phospho-beta-glucosidase BglA OS=Escherichia coli (strain K12) GN=bglA PE=1 SV=2
ko01040	Biosynthesis of unsaturated fatty acids	comp63563_c0	dpr-miR408_L-1	sp|P55138|YGCE_ECOLI Uncharacterized sugar kinase YgcE OS=Escherichia coli (strain K12) GN=ygcE PE=3 SV=2
ko01040	Biosynthesis of unsaturated fatty acids	comp68523_c0	dpr-miR408_L-1	sp|P32152|FRVR_ECOLI Putative frv operon regulatory protein OS=Escherichia coli (strain K12) GN=frvR PE=3 SV=1
ko01040	Biosynthesis of unsaturated fatty acids	comp66377_c1	ptc-miR172b-5p	sp|P33224|AIDB_ECOLI Putative acyl-CoA dehydrogenase AidB OS=Escherichia coli (strain K12) GN=aidB PE=1 SV=3
ko01040	Biosynthesis of unsaturated fatty acids	comp64818_c0	ptc-miR172b-5p	sp|P0CZ23|ACOX3_ARATH Acyl-coenzyme A oxidase 3, peroxisomal OS=Arabidopsis thaliana GN=ACX3 PE=1 SV=1
ko01040	Biosynthesis of unsaturated fatty acids	comp66398_c0	aqc-miR172b_1ss21TG	sp|P39342|YJGR_ECOLI Uncharacterized protein YjgR OS=Escherichia coli (strain K12) GN=yjgR PE=4 SV=1
ko01040	Biosynthesis of unsaturated fatty acids	comp66377_c1	aqc-miR172b_1ss21TG	sp|P33224|AIDB_ECOLI Putative acyl-CoA dehydrogenase AidB OS=Escherichia coli (strain K12) GN=aidB PE=1 SV=3
ko01040	Biosynthesis of unsaturated fatty acids	comp45124_c0	aqc-miR172b_1ss21TG	sp|Q83KF5|MDTQ_SHIFL Putative multidrug resistance outer membrane protein MdtQ OS=Shigella flexneri GN=mdtQ PE=5 SV=3
ko01040	Biosynthesis of unsaturated fatty acids	comp67560_c0	aqc-miR172b_1ss21TG	sp|P0ACE1|MBHM_ECO57 Hydrogenase-2 large chain OS=Escherichia coli O157:H7 GN=hybC PE=3 SV=2
ko01040	Biosynthesis of unsaturated fatty acids	comp66054_c0	ama-miR396-5p_1ss21TG	sp|P05804|BGLR_ECOLI Beta-glucuronidase OS=Escherichia coli (strain K12) GN=uidA PE=1 SV=2
ko01040	Biosynthesis of unsaturated fatty acids	comp66054_c0	ama-miR396-5p_1ss21TG	sp|P05804|BGLR_ECOLI Beta-glucuronidase OS=Escherichia coli (strain K12) GN=uidA PE=1 SV=2
ko01040	Biosynthesis of unsaturated fatty acids	comp66054_c0	gra-miR167a_L-2R+2	sp|P05804|BGLR_ECOLI Beta-glucuronidase OS=Escherichia coli (strain K12) GN=uidA PE=1 SV=2
ko01040	Biosynthesis of unsaturated fatty acids	comp68523_c0	nta-MIR6149a-p5_2ss18CT21TA	sp|P32152|FRVR_ECOLI Putative frv operon regulatory protein OS=Escherichia coli (strain K12) GN=frvR PE=3 SV=1
ko01040	Biosynthesis of unsaturated fatty acids	comp66054_c0	amg-miR396	sp|P05804|BGLR_ECOLI Beta-glucuronidase OS=Escherichia coli (strain K12) GN=uidA PE=1 SV=2
ko01040	Biosynthesis of unsaturated fatty acids	comp66054_c0	amg-miR396	sp|P05804|BGLR_ECOLI Beta-glucuronidase OS=Escherichia coli (strain K12) GN=uidA PE=1 SV=2
ko01040	Biosynthesis of unsaturated fatty acids	comp66377_c1	aly-miR171c-5p_1ss5AG	sp|P33224|AIDB_ECOLI Putative acyl-CoA dehydrogenase AidB OS=Escherichia coli (strain K12) GN=aidB PE=1 SV=3
ko01040	Biosynthesis of unsaturated fatty acids	comp68523_c0	aly-miR171c-5p_1ss5AG	sp|P32152|FRVR_ECOLI Putative frv operon regulatory protein OS=Escherichia coli (strain K12) GN=frvR PE=3 SV=1
ko01040	Biosynthesis of unsaturated fatty acids	comp68523_c0	aly-miR171c-5p_1ss5AG	sp|P32152|FRVR_ECOLI Putative frv operon regulatory protein OS=Escherichia coli (strain K12) GN=frvR PE=3 SV=1
ko01040	Biosynthesis of unsaturated fatty acids	comp66054_c0	lja-miR171c	sp|P05804|BGLR_ECOLI Beta-glucuronidase OS=Escherichia coli (strain K12) GN=uidA PE=1 SV=2
ko01040	Biosynthesis of unsaturated fatty acids	comp64597_c0	mes-MIR477g-p5_1ss1CT	sp|O65202|ACOX1_ARATH Peroxisomal acyl-coenzyme A oxidase 1 OS=Arabidopsis thaliana GN=ACX1 PE=1 SV=1
ko01040	Biosynthesis of unsaturated fatty acids	comp56455_c0	mes-MIR477g-p5_1ss1CT	sp|Q9M2U2|ECR_ARATH Very-long-chain enoyl-CoA reductase OS=Arabidopsis thaliana GN=ECR PE=2 SV=1
ko01040	Biosynthesis of unsaturated fatty acids	comp48800_c0	nta-miR172d	sp|P22337|STAD_RICCO Acyl-[acyl-carrier-protein] desaturase, chloroplastic OS=Ricinus communis PE=1 SV=1
ko01040	Biosynthesis of unsaturated fatty acids	comp66398_c0	nta-miR172d	sp|P39342|YJGR_ECOLI Uncharacterized protein YjgR OS=Escherichia coli (strain K12) GN=yjgR PE=4 SV=1
ko01040	Biosynthesis of unsaturated fatty acids	comp66377_c1	nta-miR172d	sp|P33224|AIDB_ECOLI Putative acyl-CoA dehydrogenase AidB OS=Escherichia coli (strain K12) GN=aidB PE=1 SV=3
ko01040	Biosynthesis of unsaturated fatty acids	comp68523_c0	nta-miR172d	sp|P32152|FRVR_ECOLI Putative frv operon regulatory protein OS=Escherichia coli (strain K12) GN=frvR PE=3 SV=1
ko01040	Biosynthesis of unsaturated fatty acids	comp66054_c0	ppe-miR172a-5p_1ss21GA	sp|P05804|BGLR_ECOLI Beta-glucuronidase OS=Escherichia coli (strain K12) GN=uidA PE=1 SV=2
ko01040	Biosynthesis of unsaturated fatty acids	comp66398_c0	aqc-MIR172b-p3_1ss9TC	sp|P39342|YJGR_ECOLI Uncharacterized protein YjgR OS=Escherichia coli (strain K12) GN=yjgR PE=4 SV=1
ko01040	Biosynthesis of unsaturated fatty acids	comp67560_c0	aqc-MIR172b-p3_1ss9TC	sp|P0ACE1|MBHM_ECO57 Hydrogenase-2 large chain OS=Escherichia coli O157:H7 GN=hybC PE=3 SV=2
ko01040	Biosynthesis of unsaturated fatty acids	comp68523_c0	hbr-MIR159b-p3_1ss20GA	sp|P32152|FRVR_ECOLI Putative frv operon regulatory protein OS=Escherichia coli (strain K12) GN=frvR PE=3 SV=1
ko01040	Biosynthesis of unsaturated fatty acids	comp66054_c0	mtr-MIR2592bj-p3_2ss12TC19AT_1	sp|P05804|BGLR_ECOLI Beta-glucuronidase OS=Escherichia coli (strain K12) GN=uidA PE=1 SV=2
ko01040	Biosynthesis of unsaturated fatty acids	comp66054_c0	mtr-MIR2592bj-p3_2ss12TC19AT_1	sp|P05804|BGLR_ECOLI Beta-glucuronidase OS=Escherichia coli (strain K12) GN=uidA PE=1 SV=2
ko01040	Biosynthesis of unsaturated fatty acids	comp48800_c0	ath-miR172a	sp|P22337|STAD_RICCO Acyl-[acyl-carrier-protein] desaturase, chloroplastic OS=Ricinus communis PE=1 SV=1
ko01040	Biosynthesis of unsaturated fatty acids	comp66398_c0	ath-miR172a	sp|P39342|YJGR_ECOLI Uncharacterized protein YjgR OS=Escherichia coli (strain K12) GN=yjgR PE=4 SV=1
ko01040	Biosynthesis of unsaturated fatty acids	comp66377_c1	ath-miR172a	sp|P33224|AIDB_ECOLI Putative acyl-CoA dehydrogenase AidB OS=Escherichia coli (strain K12) GN=aidB PE=1 SV=3
ko01040	Biosynthesis of unsaturated fatty acids	comp68523_c0	ath-miR172a	sp|P32152|FRVR_ECOLI Putative frv operon regulatory protein OS=Escherichia coli (strain K12) GN=frvR PE=3 SV=1
ko01040	Biosynthesis of unsaturated fatty acids	comp67560_c0	ath-MIR5645e-p3_2ss18TG20TG_2	sp|P0ACE1|MBHM_ECO57 Hydrogenase-2 large chain OS=Escherichia coli O157:H7 GN=hybC PE=3 SV=2
ko01040	Biosynthesis of unsaturated fatty acids	comp63563_c0	ath-MIR5645e-p3_2ss18TG20TG_2	sp|P55138|YGCE_ECOLI Uncharacterized sugar kinase YgcE OS=Escherichia coli (strain K12) GN=ygcE PE=3 SV=2
ko01040	Biosynthesis of unsaturated fatty acids	comp66377_c1	ccl-miR171	sp|P33224|AIDB_ECOLI Putative acyl-CoA dehydrogenase AidB OS=Escherichia coli (strain K12) GN=aidB PE=1 SV=3
ko01040	Biosynthesis of unsaturated fatty acids	comp68523_c0	ccl-miR171	sp|P32152|FRVR_ECOLI Putative frv operon regulatory protein OS=Escherichia coli (strain K12) GN=frvR PE=3 SV=1
ko00500	Starch and sucrose metabolism	comp68373_c0	mdm-MIR391-p5_2ss16CT20GA	sp|P0AC86|PHSG_ECOLI Glycogen phosphorylase OS=Escherichia coli (strain K12) GN=glgP PE=3 SV=1
ko00500	Starch and sucrose metabolism	comp53609_c0	mdm-MIR391-p5_2ss16CT20GA	sp|Q96558|UGDH1_SOYBN UDP-glucose 6-dehydrogenase 1 OS=Glycine max GN=UGD1 PE=1 SV=1
ko00500	Starch and sucrose metabolism	comp66556_c1	csi-miR1515_1ss16AG	sp|P36938|PGM_ECOLI Phosphoglucomutase OS=Escherichia coli (strain K12) GN=pgm PE=1 SV=1
ko00500	Starch and sucrose metabolism	comp68338_c0	col-miRn-3p-16403_272	sp|P0AC86|PHSG_ECOLI Glycogen phosphorylase OS=Escherichia coli (strain K12) GN=glgP PE=3 SV=1
ko00500	Starch and sucrose metabolism	comp68338_c0	col-miRn-3p-16403_272	sp|P0AC86|PHSG_ECOLI Glycogen phosphorylase OS=Escherichia coli (strain K12) GN=glgP PE=3 SV=1
ko00500	Starch and sucrose metabolism	comp66556_c1	col-miRn-3p-16403_272	sp|P36938|PGM_ECOLI Phosphoglucomutase OS=Escherichia coli (strain K12) GN=pgm PE=1 SV=1
ko00500	Starch and sucrose metabolism	comp228739_c0	col-miRn-3p-253727_10	sp|Q94KD8|BXL2_ARATH Probable beta-D-xylosidase 2 OS=Arabidopsis thaliana GN=BXL2 PE=2 SV=1
ko00500	Starch and sucrose metabolism	comp228739_c0	col-miRn-3p-253727_10	sp|Q94KD8|BXL2_ARATH Probable beta-D-xylosidase 2 OS=Arabidopsis thaliana GN=BXL2 PE=2 SV=1
ko00500	Starch and sucrose metabolism	comp51899_c0	col-miRn-3p-253727_10	sp|Q9CAC1|GUN8_ARATH Endoglucanase 8 OS=Arabidopsis thaliana GN=CEL1 PE=2 SV=1
ko00500	Starch and sucrose metabolism	comp68338_c0	csi-miR162-5p_L-1_1ss5GC	sp|P0AC86|PHSG_ECOLI Glycogen phosphorylase OS=Escherichia coli (strain K12) GN=glgP PE=3 SV=1
ko00500	Starch and sucrose metabolism	comp66556_c1	csi-miR162-5p_L-1_1ss5GC	sp|P36938|PGM_ECOLI Phosphoglucomutase OS=Escherichia coli (strain K12) GN=pgm PE=1 SV=1
ko00500	Starch and sucrose metabolism	comp579936_c0	ppe-miR399b_L-2R+2	sp|Q8VYZ3|PME53_ARATH Probable pectinesterase 53 OS=Arabidopsis thaliana GN=PME53 PE=2 SV=1
ko00500	Starch and sucrose metabolism	comp64548_c0	ppe-miR399b_L-2R+2	sp|Q1JPL7|PME18_ARATH Pectinesterase/pectinesterase inhibitor 18 OS=Arabidopsis thaliana GN=PME18 PE=1 SV=3
ko00500	Starch and sucrose metabolism	comp41203_c0	crt-miR168_L-2	sp|Q9STI6|GAE5_ARATH UDP-glucuronate 4-epimerase 5 OS=Arabidopsis thaliana GN=GAE5 PE=2 SV=1
ko00500	Starch and sucrose metabolism	comp63040_c0	crt-miR168_L-2	sp|A5JTQ3|XYL2_MEDSV Beta-xylosidase/alpha-L-arabinofuranosidase 2 OS=Medicago sativa subsp. varia GN=Xyl2 PE=2 SV=1
ko00500	Starch and sucrose metabolism	comp62816_c1	crt-miR168_L-2	sp|O24301|SUS2_PEA Sucrose synthase 2 OS=Pisum sativum GN=SUS2 PE=2 SV=1
ko00500	Starch and sucrose metabolism	comp13379_c0	crt-miR168_L-2	sp|Q94KD8|BXL2_ARATH Probable beta-D-xylosidase 2 OS=Arabidopsis thaliana GN=BXL2 PE=2 SV=1
ko00500	Starch and sucrose metabolism	comp66783_c0	crt-miR168_L-2	sp|Q8VYW2|BAM9_ARATH Inactive beta-amylase 9 OS=Arabidopsis thaliana GN=BAM9 PE=2 SV=1
ko00500	Starch and sucrose metabolism	comp66167_c0	ptc-miR172a	sp|Q9LRA7|TPS9_ARATH Probable alpha,alpha-trehalose-phosphate synthase [UDP-forming] 9 OS=Arabidopsis thaliana GN=TPS9 PE=1 SV=1
ko00500	Starch and sucrose metabolism	comp66167_c0	ptc-miR172a	sp|Q9LRA7|TPS9_ARATH Probable alpha,alpha-trehalose-phosphate synthase [UDP-forming] 9 OS=Arabidopsis thaliana GN=TPS9 PE=1 SV=1
ko00500	Starch and sucrose metabolism	comp68521_c0	ptc-miR172a	sp|P31434|XYLS_ECOLI Alpha-xylosidase OS=Escherichia coli (strain K12) GN=yicI PE=1 SV=2
ko00500	Starch and sucrose metabolism	comp6164_c0	ptc-miR172a	sp|O80738|TPS10_ARATH Probable alpha,alpha-trehalose-phosphate synthase [UDP-forming] 10 OS=Arabidopsis thaliana GN=TPS10 PE=2 SV=1
ko00500	Starch and sucrose metabolism	comp68373_c0	ptc-miR172a	sp|P0AC86|PHSG_ECOLI Glycogen phosphorylase OS=Escherichia coli (strain K12) GN=glgP PE=3 SV=1
ko00500	Starch and sucrose metabolism	comp67345_c0	ptc-miR172a	sp|Q9SGZ5|BXL7_ARATH Probable beta-D-xylosidase 7 OS=Arabidopsis thaliana GN=BXL7 PE=2 SV=2
ko00500	Starch and sucrose metabolism	comp68338_c0	aly-miR169b-3p_2ss12C-15CT	sp|P0AC86|PHSG_ECOLI Glycogen phosphorylase OS=Escherichia coli (strain K12) GN=glgP PE=3 SV=1
ko00500	Starch and sucrose metabolism	comp60556_c0	sly-miR319c-5p_2ss8CT15CT	sp|O81416|GUN17_ARATH Endoglucanase 17 OS=Arabidopsis thaliana GN=At4g02290 PE=2 SV=1
ko00500	Starch and sucrose metabolism	comp50808_c0	sly-miR319c-5p_2ss8CT15CT	sp|Q9M1B9|SCRK4_ARATH Probable fructokinase-4 OS=Arabidopsis thaliana GN=At3g59480 PE=2 SV=1
ko00500	Starch and sucrose metabolism	comp44161_c0	sly-miR319c-5p_2ss8CT15CT	sp|Q7XKV4|BGL12_ORYSJ Beta-glucosidase 12 OS=Oryza sativa subsp. japonica GN=BGLU12 PE=2 SV=2
ko00500	Starch and sucrose metabolism	comp68110_c0	sly-miR319c-5p_2ss8CT15CT	sp|P19595|UGPA_SOLTU UTP--glucose-1-phosphate uridylyltransferase OS=Solanum tuberosum PE=1 SV=3
ko00500	Starch and sucrose metabolism	comp57720_c0	mes-miR156a	sp|O80689|BGL45_ARATH Beta-glucosidase 45 OS=Arabidopsis thaliana GN=BGLU45 PE=1 SV=1
ko00500	Starch and sucrose metabolism	comp68170_c0	mes-miR156a	sp|P07363|CHEA_ECOLI Chemotaxis protein CheA OS=Escherichia coli (strain K12) GN=cheA PE=1 SV=3
ko00500	Starch and sucrose metabolism	comp65424_c0	mes-miR156a	sp|Q67XC9|TPPD_ARATH Probable trehalose-phosphate phosphatase D OS=Arabidopsis thaliana GN=TPPD PE=2 SV=1
ko00500	Starch and sucrose metabolism	comp68307_c0	mes-miR156a	sp|Q9ZV48|TPS11_ARATH Probable alpha,alpha-trehalose-phosphate synthase [UDP-forming] 11 OS=Arabidopsis thaliana GN=TPS11 PE=2 SV=1
ko00500	Starch and sucrose metabolism	comp43173_c0	mes-miR156a	sp|Q9LIS3|GAE6_ARATH UDP-glucuronate 4-epimerase 6 OS=Arabidopsis thaliana GN=GAE6 PE=1 SV=1
ko00500	Starch and sucrose metabolism	comp33441_c0	mtr-miR156a_L+1R-1_1ss4AC	sp|Q9FXI9|GUN2_ARATH Endoglucanase 2 OS=Arabidopsis thaliana GN=At1g19940 PE=2 SV=1
ko00500	Starch and sucrose metabolism	comp68521_c0	csi-miR172c_L-1_1ss6TA	sp|P31434|XYLS_ECOLI Alpha-xylosidase OS=Escherichia coli (strain K12) GN=yicI PE=1 SV=2
ko00500	Starch and sucrose metabolism	comp68373_c0	csi-miR172c_L-1_1ss6TA	sp|P0AC86|PHSG_ECOLI Glycogen phosphorylase OS=Escherichia coli (strain K12) GN=glgP PE=3 SV=1
ko00500	Starch and sucrose metabolism	comp66491_c0	csi-miR172c_L-1_1ss6TA	sp|Q9SYM4|TPS1_ARATH Alpha,alpha-trehalose-phosphate synthase [UDP-forming] 1 OS=Arabidopsis thaliana GN=TPS1 PE=1 SV=1
ko00500	Starch and sucrose metabolism	comp273292_c0	pvu-miR159a.1	sp|Q876J2|SPR1_SACBA Sporulation-specific glucan 1,3-beta-glucosidase OS=Saccharomyces bayanus GN=SPR1 PE=3 SV=1
ko00500	Starch and sucrose metabolism	comp62548_c0	col-miRn-3p-54304_90	sp|P55233|GLGL1_BETVU Glucose-1-phosphate adenylyltransferase large subunit, chloroplastic/amyloplastic OS=Beta vulgaris GN=AGPS1 PE=2 SV=1
ko00500	Starch and sucrose metabolism	comp57720_c0	han-miR156a_L+1	sp|O80689|BGL45_ARATH Beta-glucosidase 45 OS=Arabidopsis thaliana GN=BGLU45 PE=1 SV=1
ko00500	Starch and sucrose metabolism	comp68170_c0	han-miR156a_L+1	sp|P07363|CHEA_ECOLI Chemotaxis protein CheA OS=Escherichia coli (strain K12) GN=cheA PE=1 SV=3
ko00500	Starch and sucrose metabolism	comp17567_c0	stu-miR8016_1ss7GT	sp|Q3E989|PME54_ARATH Probable pectinesterase/pectinesterase inhibitor 54 OS=Arabidopsis thaliana GN=PME54 PE=2 SV=1
ko00500	Starch and sucrose metabolism	comp58995_c0	gma-MIR5368-p3_1ss16CT_1	sp|Q8VYZ3|PME53_ARATH Probable pectinesterase 53 OS=Arabidopsis thaliana GN=PME53 PE=2 SV=1
ko00500	Starch and sucrose metabolism	comp68521_c0	aly-MIR394a-p3_2ss16CA17TG	sp|P31434|XYLS_ECOLI Alpha-xylosidase OS=Escherichia coli (strain K12) GN=yicI PE=1 SV=2
ko00500	Starch and sucrose metabolism	comp68338_c0	aly-MIR394a-p3_2ss16CA17TG	sp|P0AC86|PHSG_ECOLI Glycogen phosphorylase OS=Escherichia coli (strain K12) GN=glgP PE=3 SV=1
ko00500	Starch and sucrose metabolism	comp53609_c0	ppe-miR397_1ss10GC	sp|Q96558|UGDH1_SOYBN UDP-glucose 6-dehydrogenase 1 OS=Glycine max GN=UGD1 PE=1 SV=1
ko00500	Starch and sucrose metabolism	comp68020_c0	ppe-miR397_1ss10GC	sp|Q42059|GUN6_ARATH Endoglucanase 6 OS=Arabidopsis thaliana GN=At1g64390 PE=2 SV=2
ko00500	Starch and sucrose metabolism	comp58965_c0	ppe-miR397_1ss10GC	sp|P32811|PHSH_SOLTU Alpha-glucan phosphorylase, H isozyme OS=Solanum tuberosum PE=1 SV=1
ko00500	Starch and sucrose metabolism	comp33441_c0	ppe-miR397_1ss10GC	sp|Q9FXI9|GUN2_ARATH Endoglucanase 2 OS=Arabidopsis thaliana GN=At1g19940 PE=2 SV=1
ko00500	Starch and sucrose metabolism	comp50713_c0	peu-MIR2916-p5_1ss5AG	sp|Q9LMI0|TPS7_ARATH Probable alpha,alpha-trehalose-phosphate synthase [UDP-forming] 7 OS=Arabidopsis thaliana GN=TPS7 PE=1 SV=1
ko00500	Starch and sucrose metabolism	comp68307_c0	peu-MIR2916-p5_1ss5AG	sp|Q9ZV48|TPS11_ARATH Probable alpha,alpha-trehalose-phosphate synthase [UDP-forming] 11 OS=Arabidopsis thaliana GN=TPS11 PE=2 SV=1
ko00500	Starch and sucrose metabolism	comp57665_c0	bcy-miR156_L-1	sp|P85076|PME_ACTDE Pectinesterase OS=Actinidia deliciosa PE=1 SV=1
ko00500	Starch and sucrose metabolism	comp63334_c0	vvi-miR160c_L+1R-1	sp|P29001|INVA_VIGRR Acid beta-fructofuranosidase OS=Vigna radiata var. radiata GN=INVA PE=1 SV=1
ko00500	Starch and sucrose metabolism	comp57201_c0	vvi-miR160c_L+1R-1	sp|O81312|GAE3_ARATH UDP-glucuronate 4-epimerase 3 OS=Arabidopsis thaliana GN=GAE3 PE=2 SV=1
ko00500	Starch and sucrose metabolism	comp64491_c0	mtr-miR156h-3p_1ss8AC	sp|Q5Z9Z0|BGL24_ORYSJ Beta-glucosidase 24 OS=Oryza sativa subsp. japonica GN=BGLU24 PE=2 SV=1
ko00500	Starch and sucrose metabolism	comp64491_c0	mtr-miR156h-3p_1ss8AC	sp|Q5Z9Z0|BGL24_ORYSJ Beta-glucosidase 24 OS=Oryza sativa subsp. japonica GN=BGLU24 PE=2 SV=1
ko00500	Starch and sucrose metabolism	comp68025_c0	mtr-miR156h-3p_1ss8AC	sp|Q38890|GUN25_ARATH Endoglucanase 25 OS=Arabidopsis thaliana GN=KOR PE=1 SV=1
ko00500	Starch and sucrose metabolism	comp66556_c1	mtr-miR156h-3p_1ss8AC	sp|P36938|PGM_ECOLI Phosphoglucomutase OS=Escherichia coli (strain K12) GN=pgm PE=1 SV=1
ko00500	Starch and sucrose metabolism	comp49969_c0	mtr-miR156h-3p_1ss8AC	sp|Q9FF77|PME47_ARATH Probable pectinesterase/pectinesterase inhibitor 47 OS=Arabidopsis thaliana GN=PME47 PE=2 SV=1
ko00500	Starch and sucrose metabolism	comp68307_c0	mtr-miR156h-3p_1ss8AC	sp|Q9ZV48|TPS11_ARATH Probable alpha,alpha-trehalose-phosphate synthase [UDP-forming] 11 OS=Arabidopsis thaliana GN=TPS11 PE=2 SV=1
ko00500	Starch and sucrose metabolism	comp68085_c0	ath-MIR5645e-p5_2ss18TG20TG	sp|Q9LPS1|HXK3_ARATH Hexokinase-3 OS=Arabidopsis thaliana GN=At1g50460 PE=1 SV=1
ko00500	Starch and sucrose metabolism	comp176491_c0	ath-MIR5645e-p5_2ss18TG20TG	sp|Q06801|DPEP_SOLTU 4-alpha-glucanotransferase, chloroplastic/amyloplastic OS=Solanum tuberosum GN=DPEP PE=1 SV=1
ko00500	Starch and sucrose metabolism	comp50017_c0	ath-MIR5645e-p5_2ss18TG20TG	sp|P26204|BGLS_TRIRP Non-cyanogenic beta-glucosidase OS=Trifolium repens PE=1 SV=1
ko00500	Starch and sucrose metabolism	comp53950_c0	ath-MIR5645e-p5_2ss18TG20TG	sp|P55229|GLGL1_ARATH Glucose-1-phosphate adenylyltransferase large subunit 1, chloroplastic OS=Arabidopsis thaliana GN=ADG2 PE=1 SV=3
ko00500	Starch and sucrose metabolism	comp68373_c0	ath-MIR5645e-p5_2ss18TG20TG	sp|P0AC86|PHSG_ECOLI Glycogen phosphorylase OS=Escherichia coli (strain K12) GN=glgP PE=3 SV=1
ko00500	Starch and sucrose metabolism	comp176491_c0	gma-MIR4393b-p3_2ss9AG18AG	sp|Q06801|DPEP_SOLTU 4-alpha-glucanotransferase, chloroplastic/amyloplastic OS=Solanum tuberosum GN=DPEP PE=1 SV=1
ko00500	Starch and sucrose metabolism	comp50017_c0	gma-MIR4393b-p3_2ss9AG18AG	sp|P26204|BGLS_TRIRP Non-cyanogenic beta-glucosidase OS=Trifolium repens PE=1 SV=1
ko00500	Starch and sucrose metabolism	comp68338_c0	gma-MIR4393b-p3_2ss9AG18AG	sp|P0AC86|PHSG_ECOLI Glycogen phosphorylase OS=Escherichia coli (strain K12) GN=glgP PE=3 SV=1
ko00500	Starch and sucrose metabolism	comp66556_c1	gma-MIR4393b-p3_2ss9AG18AG	sp|P36938|PGM_ECOLI Phosphoglucomutase OS=Escherichia coli (strain K12) GN=pgm PE=1 SV=1
ko00500	Starch and sucrose metabolism	comp66542_c0	mes-miR530a_R+1_1ss20TG	sp|O23553|BAM3_ARATH Beta-amylase 3, chloroplastic OS=Arabidopsis thaliana GN=BAM3 PE=1 SV=3
ko00500	Starch and sucrose metabolism	comp63362_c0	mes-miR530a_R+1_1ss20TG	sp|P80065|INVB_DAUCA Beta-fructofuranosidase, soluble isoenzyme I OS=Daucus carota GN=INV*DC4 PE=1 SV=2
ko00500	Starch and sucrose metabolism	comp65897_c0	mes-miR530a_R+1_1ss20TG	sp|O04887|PME2_CITSI Pectinesterase 2 OS=Citrus sinensis GN=PECS-2.1 PE=2 SV=1
ko00500	Starch and sucrose metabolism	comp67495_c0	cpa-miR393_R-1	sp|O22060|SPSA1_CITUN Probable sucrose-phosphate synthase 1 OS=Citrus unshiu GN=SPS1 PE=2 SV=1
ko00500	Starch and sucrose metabolism	comp52273_c0	ccl-miR167a	sp|B7LAX0|G6PI_ECO55 Glucose-6-phosphate isomerase OS=Escherichia coli (strain 55989 / EAEC) GN=pgi PE=3 SV=1
ko00500	Starch and sucrose metabolism	comp68338_c0	ccl-miR167a	sp|P0AC86|PHSG_ECOLI Glycogen phosphorylase OS=Escherichia coli (strain K12) GN=glgP PE=3 SV=1
ko00500	Starch and sucrose metabolism	comp66757_c0	ccl-miR167a	sp|O23617|TPS5_ARATH Alpha,alpha-trehalose-phosphate synthase [UDP-forming] 5 OS=Arabidopsis thaliana GN=TPS5 PE=1 SV=2
ko00500	Starch and sucrose metabolism	comp68110_c0	col-miRn-5p-68355_69	sp|P19595|UGPA_SOLTU UTP--glucose-1-phosphate uridylyltransferase OS=Solanum tuberosum PE=1 SV=3
ko00500	Starch and sucrose metabolism	comp30422_c0	col-miRn-5p-68355_69	sp|O48809|LRX2_ARATH Leucine-rich repeat extensin-like protein 2 OS=Arabidopsis thaliana GN=LRX2 PE=1 SV=1
ko00500	Starch and sucrose metabolism	comp66167_c0	col-miRn-5p-68355_69	sp|Q9LRA7|TPS9_ARATH Probable alpha,alpha-trehalose-phosphate synthase [UDP-forming] 9 OS=Arabidopsis thaliana GN=TPS9 PE=1 SV=1
ko00500	Starch and sucrose metabolism	comp68237_c0	tcc-miR162	sp|O23647|GLGB1_ARATH 1,4-alpha-glucan-branching enzyme 2-1, chloroplastic/amyloplastic OS=Arabidopsis thaliana GN=SBE2.1 PE=1 SV=1
ko00500	Starch and sucrose metabolism	comp68020_c0	tcc-miR162	sp|Q42059|GUN6_ARATH Endoglucanase 6 OS=Arabidopsis thaliana GN=At1g64390 PE=2 SV=2
ko00500	Starch and sucrose metabolism	comp68357_c0	tcc-miR162	sp|O22060|SPSA1_CITUN Probable sucrose-phosphate synthase 1 OS=Citrus unshiu GN=SPS1 PE=2 SV=1
ko00500	Starch and sucrose metabolism	comp67500_c0	ptc-MIR482d-p3_2ss12AG21CT	sp|Q94A41|AMY3_ARATH Alpha-amylase 3, chloroplastic OS=Arabidopsis thaliana GN=AMY3 PE=2 SV=1
ko00500	Starch and sucrose metabolism	comp36021_c0	col-miRn-5p-315953_8	sp|O24509|INVA_PHAVU Acid beta-fructofuranosidase OS=Phaseolus vulgaris PE=2 SV=1
ko00500	Starch and sucrose metabolism	comp66757_c0	ath-miR390a-5p	sp|O23617|TPS5_ARATH Alpha,alpha-trehalose-phosphate synthase [UDP-forming] 5 OS=Arabidopsis thaliana GN=TPS5 PE=1 SV=2
ko00500	Starch and sucrose metabolism	comp68357_c0	ath-miR390a-5p	sp|O22060|SPSA1_CITUN Probable sucrose-phosphate synthase 1 OS=Citrus unshiu GN=SPS1 PE=2 SV=1
ko00500	Starch and sucrose metabolism	comp55212_c0	ppe-miR1511-3p_L+1R-4	-
ko00500	Starch and sucrose metabolism	comp68521_c0	ppe-miR1511-3p_L+1R-4	sp|P31434|XYLS_ECOLI Alpha-xylosidase OS=Escherichia coli (strain K12) GN=yicI PE=1 SV=2
ko00500	Starch and sucrose metabolism	comp68521_c0	ppe-miR1511-3p_L+1R-4	sp|P31434|XYLS_ECOLI Alpha-xylosidase OS=Escherichia coli (strain K12) GN=yicI PE=1 SV=2
ko00500	Starch and sucrose metabolism	comp54469_c0	ppe-miR1511-3p_L+1R-4	sp|Q9SM59|PGMP_PEA Phosphoglucomutase, chloroplastic OS=Pisum sativum GN=PGMP PE=1 SV=1
ko00500	Starch and sucrose metabolism	comp54852_c0	ppe-miR1511-3p_L+1R-4	sp|Q9LIR6|BAM1_ARATH Beta-amylase 1, chloroplastic OS=Arabidopsis thaliana GN=BAM1 PE=1 SV=1
ko00500	Starch and sucrose metabolism	comp67868_c0	mdm-miR408a_L-1R+1	sp|Q43866|INV1_ARATH Beta-fructofuranosidase, insoluble isoenzyme CWINV1 OS=Arabidopsis thaliana GN=CWINV1 PE=1 SV=1
ko00500	Starch and sucrose metabolism	comp66757_c0	tcc-miR390a	sp|O23617|TPS5_ARATH Alpha,alpha-trehalose-phosphate synthase [UDP-forming] 5 OS=Arabidopsis thaliana GN=TPS5 PE=1 SV=2
ko00500	Starch and sucrose metabolism	comp68357_c0	tcc-miR390a	sp|O22060|SPSA1_CITUN Probable sucrose-phosphate synthase 1 OS=Citrus unshiu GN=SPS1 PE=2 SV=1
ko00500	Starch and sucrose metabolism	comp68237_c0	hpe-miR162a_L-2	sp|O23647|GLGB1_ARATH 1,4-alpha-glucan-branching enzyme 2-1, chloroplastic/amyloplastic OS=Arabidopsis thaliana GN=SBE2.1 PE=1 SV=1
ko00500	Starch and sucrose metabolism	comp68237_c0	hpe-miR162a_L-2	sp|O23647|GLGB1_ARATH 1,4-alpha-glucan-branching enzyme 2-1, chloroplastic/amyloplastic OS=Arabidopsis thaliana GN=SBE2.1 PE=1 SV=1
ko00500	Starch and sucrose metabolism	comp68357_c0	hpe-miR162a_L-2	sp|O22060|SPSA1_CITUN Probable sucrose-phosphate synthase 1 OS=Citrus unshiu GN=SPS1 PE=2 SV=1
ko00500	Starch and sucrose metabolism	comp68020_c0	hpe-miR162a_L-2	sp|Q42059|GUN6_ARATH Endoglucanase 6 OS=Arabidopsis thaliana GN=At1g64390 PE=2 SV=2
ko00500	Starch and sucrose metabolism	comp68110_c0	col-miRn-5p-166889_20	sp|P19595|UGPA_SOLTU UTP--glucose-1-phosphate uridylyltransferase OS=Solanum tuberosum PE=1 SV=3
ko00500	Starch and sucrose metabolism	comp68085_c0	ath-MIR5645e-p3_1ss18TA	sp|Q9LPS1|HXK3_ARATH Hexokinase-3 OS=Arabidopsis thaliana GN=At1g50460 PE=1 SV=1
ko00500	Starch and sucrose metabolism	comp68373_c0	ath-MIR5645e-p3_1ss18TA	sp|P0AC86|PHSG_ECOLI Glycogen phosphorylase OS=Escherichia coli (strain K12) GN=glgP PE=3 SV=1
ko00500	Starch and sucrose metabolism	comp53950_c0	ath-MIR5645e-p3_1ss18TA	sp|P55229|GLGL1_ARATH Glucose-1-phosphate adenylyltransferase large subunit 1, chloroplastic OS=Arabidopsis thaliana GN=ADG2 PE=1 SV=3
ko00500	Starch and sucrose metabolism	comp68170_c0	col-miRn-3p-152189_23	sp|P07363|CHEA_ECOLI Chemotaxis protein CheA OS=Escherichia coli (strain K12) GN=cheA PE=1 SV=3
ko00500	Starch and sucrose metabolism	comp55654_c0	col-miRn-3p-152189_23	sp|Q8RXK7|PME41_ARATH Probable pectinesterase/pectinesterase inhibitor 41 OS=Arabidopsis thaliana GN=PME41 PE=2 SV=2
ko00500	Starch and sucrose metabolism	comp66542_c0	col-miRn-3p-152189_23	sp|O23553|BAM3_ARATH Beta-amylase 3, chloroplastic OS=Arabidopsis thaliana GN=BAM3 PE=1 SV=3
ko00500	Starch and sucrose metabolism	comp14251_c0	hpe-miR166a_1ss5AC	sp|Q9ZT82|CALSC_ARATH Callose synthase 12 OS=Arabidopsis thaliana GN=CALS12 PE=1 SV=1
ko00500	Starch and sucrose metabolism	comp68170_c0	aly-miR393a-3p_1ss12TC	sp|P07363|CHEA_ECOLI Chemotaxis protein CheA OS=Escherichia coli (strain K12) GN=cheA PE=1 SV=3
ko00500	Starch and sucrose metabolism	comp65083_c0	aly-miR393a-3p_1ss12TC	sp|Q9LV33|BGL44_ARATH Beta-glucosidase 44 OS=Arabidopsis thaliana GN=BGLU44 PE=2 SV=1
ko00500	Starch and sucrose metabolism	comp68338_c0	dpr-miR167a_R+1	sp|P0AC86|PHSG_ECOLI Glycogen phosphorylase OS=Escherichia coli (strain K12) GN=glgP PE=3 SV=1
ko00500	Starch and sucrose metabolism	comp52273_c0	dpr-miR167a_R+1	sp|B7LAX0|G6PI_ECO55 Glucose-6-phosphate isomerase OS=Escherichia coli (strain 55989 / EAEC) GN=pgi PE=3 SV=1
ko00500	Starch and sucrose metabolism	comp66757_c0	dpr-miR167a_R+1	sp|O23617|TPS5_ARATH Alpha,alpha-trehalose-phosphate synthase [UDP-forming] 5 OS=Arabidopsis thaliana GN=TPS5 PE=1 SV=2
ko00500	Starch and sucrose metabolism	comp64548_c0	sly-miR168b-3p	sp|Q1JPL7|PME18_ARATH Pectinesterase/pectinesterase inhibitor 18 OS=Arabidopsis thaliana GN=PME18 PE=1 SV=3
ko00500	Starch and sucrose metabolism	comp66504_c0	stu-MIR5303j-p5_2ss10GT17CT	sp|Q9LIS3|GAE6_ARATH UDP-glucuronate 4-epimerase 6 OS=Arabidopsis thaliana GN=GAE6 PE=1 SV=1
ko00500	Starch and sucrose metabolism	comp53609_c0	stu-MIR5303j-p5_2ss10GT17CT	sp|Q96558|UGDH1_SOYBN UDP-glucose 6-dehydrogenase 1 OS=Glycine max GN=UGD1 PE=1 SV=1
ko00500	Starch and sucrose metabolism	comp57201_c0	stu-MIR5303j-p5_2ss10GT17CT	sp|O81312|GAE3_ARATH UDP-glucuronate 4-epimerase 3 OS=Arabidopsis thaliana GN=GAE3 PE=2 SV=1
ko00500	Starch and sucrose metabolism	comp281499_c0	stu-MIR5303j-p5_2ss10GT17CT	sp|Q9LMI0|TPS7_ARATH Probable alpha,alpha-trehalose-phosphate synthase [UDP-forming] 7 OS=Arabidopsis thaliana GN=TPS7 PE=1 SV=1
ko00500	Starch and sucrose metabolism	comp746346_c0	stu-MIR5303j-p5_2ss10GT17CT	-
ko00500	Starch and sucrose metabolism	comp66718_c0	stu-MIR5303j-p5_2ss10GT17CT	sp|Q9FIW4|BGL42_ARATH Beta-glucosidase 42 OS=Arabidopsis thaliana GN=BGLU42 PE=2 SV=1
ko00500	Starch and sucrose metabolism	comp66415_c0	stu-MIR5303j-p5_2ss10GT17CT	sp|Q9LKG7|UGPA_ASTPN UTP--glucose-1-phosphate uridylyltransferase OS=Astragalus penduliflorus GN=UGP PE=1 SV=1
ko00500	Starch and sucrose metabolism	comp66757_c0	mdm-miR167h_1ss22AT	sp|O23617|TPS5_ARATH Alpha,alpha-trehalose-phosphate synthase [UDP-forming] 5 OS=Arabidopsis thaliana GN=TPS5 PE=1 SV=2
ko00500	Starch and sucrose metabolism	comp66184_c1	mdm-miR167h_1ss22AT	sp|Q9LMI0|TPS7_ARATH Probable alpha,alpha-trehalose-phosphate synthase [UDP-forming] 7 OS=Arabidopsis thaliana GN=TPS7 PE=1 SV=1
ko00500	Starch and sucrose metabolism	comp437704_c0	ctr-miR164_R-1	sp|Q43763|AGLU_HORVU Alpha-glucosidase OS=Hordeum vulgare PE=2 SV=1
ko00500	Starch and sucrose metabolism	comp64183_c0	ctr-miR164_R-1	sp|O04893|AGLU_SPIOL Alpha-glucosidase OS=Spinacia oleracea PE=1 SV=1
ko00500	Starch and sucrose metabolism	comp67863_c0	ctr-miR164_R-1	sp|Q43784|SSG1_MANES Granule-bound starch synthase 1, chloroplastic/amyloplastic OS=Manihot esculenta GN=WAXY PE=2 SV=1
ko00500	Starch and sucrose metabolism	comp68373_c0	ctr-miR164_R-1	sp|P0AC86|PHSG_ECOLI Glycogen phosphorylase OS=Escherichia coli (strain K12) GN=glgP PE=3 SV=1
ko00500	Starch and sucrose metabolism	comp63427_c0	ctr-miR164_R-1	sp|Q43846|SSY3_SOLTU Soluble starch synthase 3, chloroplastic/amyloplastic OS=Solanum tuberosum GN=SS3 PE=1 SV=1
ko00500	Starch and sucrose metabolism	comp68170_c0	csi-miR166e-5p_L-1R+1_1ss21GA	sp|P07363|CHEA_ECOLI Chemotaxis protein CheA OS=Escherichia coli (strain K12) GN=cheA PE=1 SV=3
ko00500	Starch and sucrose metabolism	comp61649_c0	csi-miR166e-5p_L-1R+1_1ss21GA	sp|O48711|PME12_ARATH Probable pectinesterase/pectinesterase inhibitor 12 OS=Arabidopsis thaliana GN=PME12 PE=2 SV=1
ko00500	Starch and sucrose metabolism	comp63577_c0	csi-miR166e-5p_L-1R+1_1ss21GA	sp|P10691|SUS1_SOLTU Sucrose synthase OS=Solanum tuberosum PE=1 SV=1
ko00500	Starch and sucrose metabolism	comp68521_c0	csi-miR166e-5p_L-1R+1_1ss21GA	sp|P31434|XYLS_ECOLI Alpha-xylosidase OS=Escherichia coli (strain K12) GN=yicI PE=1 SV=2
ko00500	Starch and sucrose metabolism	comp41203_c0	bna-miR168a	sp|Q9STI6|GAE5_ARATH UDP-glucuronate 4-epimerase 5 OS=Arabidopsis thaliana GN=GAE5 PE=2 SV=1
ko00500	Starch and sucrose metabolism	comp52273_c0	gma-MIR828a-p3_2ss3AC18CA	sp|B7LAX0|G6PI_ECO55 Glucose-6-phosphate isomerase OS=Escherichia coli (strain 55989 / EAEC) GN=pgi PE=3 SV=1
ko00500	Starch and sucrose metabolism	comp52273_c0	gma-MIR828a-p3_2ss3AC18CA	sp|B7LAX0|G6PI_ECO55 Glucose-6-phosphate isomerase OS=Escherichia coli (strain 55989 / EAEC) GN=pgi PE=3 SV=1
ko00500	Starch and sucrose metabolism	comp67952_c0	gma-MIR828a-p3_2ss3AC18CA	sp|A5JTQ3|XYL2_MEDSV Beta-xylosidase/alpha-L-arabinofuranosidase 2 OS=Medicago sativa subsp. varia GN=Xyl2 PE=2 SV=1
ko00500	Starch and sucrose metabolism	comp67399_c0	gma-MIR828a-p3_2ss3AC18CA	sp|O22149|PME17_ARATH Probable pectinesterase/pectinesterase inhibitor 17 OS=Arabidopsis thaliana GN=PME17 PE=2 SV=2
ko00500	Starch and sucrose metabolism	comp68338_c0	gma-MIR828a-p3_2ss3AC18CA	sp|P0AC86|PHSG_ECOLI Glycogen phosphorylase OS=Escherichia coli (strain K12) GN=glgP PE=3 SV=1
ko00500	Starch and sucrose metabolism	comp68373_c0	gma-MIR828a-p3_2ss3AC18CA	sp|P0AC86|PHSG_ECOLI Glycogen phosphorylase OS=Escherichia coli (strain K12) GN=glgP PE=3 SV=1
ko00500	Starch and sucrose metabolism	comp62548_c0	gma-MIR828a-p3_2ss3AC18CA	sp|P55233|GLGL1_BETVU Glucose-1-phosphate adenylyltransferase large subunit, chloroplastic/amyloplastic OS=Beta vulgaris GN=AGPS1 PE=2 SV=1
ko00500	Starch and sucrose metabolism	comp55654_c0	gma-MIR828a-p3_2ss3AC18CA	sp|Q8RXK7|PME41_ARATH Probable pectinesterase/pectinesterase inhibitor 41 OS=Arabidopsis thaliana GN=PME41 PE=2 SV=2
ko00500	Starch and sucrose metabolism	comp65057_c0	gma-MIR828a-p3_2ss3AC18CA	sp|Q7XKV4|BGL12_ORYSJ Beta-glucosidase 12 OS=Oryza sativa subsp. japonica GN=BGLU12 PE=2 SV=2
ko00500	Starch and sucrose metabolism	comp67500_c0	gma-MIR828a-p3_2ss3AC18CA	sp|Q94A41|AMY3_ARATH Alpha-amylase 3, chloroplastic OS=Arabidopsis thaliana GN=AMY3 PE=2 SV=1
ko00500	Starch and sucrose metabolism	comp68307_c0	gma-MIR828a-p3_2ss3AC18CA	sp|Q9ZV48|TPS11_ARATH Probable alpha,alpha-trehalose-phosphate synthase [UDP-forming] 11 OS=Arabidopsis thaliana GN=TPS11 PE=2 SV=1
ko00500	Starch and sucrose metabolism	comp68307_c0	gma-MIR828a-p3_2ss3AC18CA	sp|Q9ZV48|TPS11_ARATH Probable alpha,alpha-trehalose-phosphate synthase [UDP-forming] 11 OS=Arabidopsis thaliana GN=TPS11 PE=2 SV=1
ko00500	Starch and sucrose metabolism	comp59974_c0	gma-MIR828a-p3_2ss3AC18CA	sp|Q42525|HXK1_ARATH Hexokinase-1 OS=Arabidopsis thaliana GN=HXK1 PE=1 SV=2
ko00500	Starch and sucrose metabolism	comp68237_c0	gma-MIR828a-p3_2ss3AC18CA	sp|O23647|GLGB1_ARATH 1,4-alpha-glucan-branching enzyme 2-1, chloroplastic/amyloplastic OS=Arabidopsis thaliana GN=SBE2.1 PE=1 SV=1
ko00500	Starch and sucrose metabolism	comp15040_c0	gma-MIR828a-p3_2ss3AC18CA	sp|Q9S9U0|CALSB_ARATH Callose synthase 11 OS=Arabidopsis thaliana GN=CALS11 PE=2 SV=1
ko00500	Starch and sucrose metabolism	comp62548_c0	gma-miR394a-5p_R+1_1ss18TA	sp|P55233|GLGL1_BETVU Glucose-1-phosphate adenylyltransferase large subunit, chloroplastic/amyloplastic OS=Beta vulgaris GN=AGPS1 PE=2 SV=1
ko00500	Starch and sucrose metabolism	comp68170_c0	mtr-MIR2592bj-p3_2ss12TC19AT_2	sp|P07363|CHEA_ECOLI Chemotaxis protein CheA OS=Escherichia coli (strain K12) GN=cheA PE=1 SV=3
ko00500	Starch and sucrose metabolism	comp67863_c0	hbr-miR398_2ss9CT21GC	sp|Q43784|SSG1_MANES Granule-bound starch synthase 1, chloroplastic/amyloplastic OS=Manihot esculenta GN=WAXY PE=2 SV=1
ko00500	Starch and sucrose metabolism	comp66184_c1	ath-miR858b	sp|Q9LMI0|TPS7_ARATH Probable alpha,alpha-trehalose-phosphate synthase [UDP-forming] 7 OS=Arabidopsis thaliana GN=TPS7 PE=1 SV=1
ko00500	Starch and sucrose metabolism	comp67047_c0	ath-miR858b	sp|Q5HZ05|TPPJ_ARATH Probable trehalose-phosphate phosphatase J OS=Arabidopsis thaliana GN=TPPJ PE=1 SV=1
ko00500	Starch and sucrose metabolism	comp556674_c0	ath-miR858b	sp|Q9SRX4|PME7_ARATH Probable pectinesterase/pectinesterase inhibitor 7 OS=Arabidopsis thaliana GN=PME7 PE=2 SV=1
ko00500	Starch and sucrose metabolism	comp55212_c0	rgl-miR5139_L-1	-
ko00500	Starch and sucrose metabolism	comp68521_c0	rgl-miR5139_L-1	sp|P31434|XYLS_ECOLI Alpha-xylosidase OS=Escherichia coli (strain K12) GN=yicI PE=1 SV=2
ko00500	Starch and sucrose metabolism	comp68521_c0	rgl-miR5139_L-1	sp|P31434|XYLS_ECOLI Alpha-xylosidase OS=Escherichia coli (strain K12) GN=yicI PE=1 SV=2
ko00500	Starch and sucrose metabolism	comp54469_c0	rgl-miR5139_L-1	sp|Q9SM59|PGMP_PEA Phosphoglucomutase, chloroplastic OS=Pisum sativum GN=PGMP PE=1 SV=1
ko00500	Starch and sucrose metabolism	comp54852_c0	rgl-miR5139_L-1	sp|Q9LIR6|BAM1_ARATH Beta-amylase 1, chloroplastic OS=Arabidopsis thaliana GN=BAM1 PE=1 SV=1
ko00500	Starch and sucrose metabolism	comp68085_c0	ath-MIR5645e-p3_2ss18TG20TG_1	sp|Q9LPS1|HXK3_ARATH Hexokinase-3 OS=Arabidopsis thaliana GN=At1g50460 PE=1 SV=1
ko00500	Starch and sucrose metabolism	comp176491_c0	ath-MIR5645e-p3_2ss18TG20TG_1	sp|Q06801|DPEP_SOLTU 4-alpha-glucanotransferase, chloroplastic/amyloplastic OS=Solanum tuberosum GN=DPEP PE=1 SV=1
ko00500	Starch and sucrose metabolism	comp50017_c0	ath-MIR5645e-p3_2ss18TG20TG_1	sp|P26204|BGLS_TRIRP Non-cyanogenic beta-glucosidase OS=Trifolium repens PE=1 SV=1
ko00500	Starch and sucrose metabolism	comp53950_c0	ath-MIR5645e-p3_2ss18TG20TG_1	sp|P55229|GLGL1_ARATH Glucose-1-phosphate adenylyltransferase large subunit 1, chloroplastic OS=Arabidopsis thaliana GN=ADG2 PE=1 SV=3
ko00500	Starch and sucrose metabolism	comp68373_c0	ath-MIR5645e-p3_2ss18TG20TG_1	sp|P0AC86|PHSG_ECOLI Glycogen phosphorylase OS=Escherichia coli (strain K12) GN=glgP PE=3 SV=1
ko00500	Starch and sucrose metabolism	comp67868_c0	gma-miR408a-3p_L-1R+1	sp|Q43866|INV1_ARATH Beta-fructofuranosidase, insoluble isoenzyme CWINV1 OS=Arabidopsis thaliana GN=CWINV1 PE=1 SV=1
ko00500	Starch and sucrose metabolism	comp68373_c0	ghr-MIR7499-p3_2ss10GC17CG	sp|P0AC86|PHSG_ECOLI Glycogen phosphorylase OS=Escherichia coli (strain K12) GN=glgP PE=3 SV=1
ko00500	Starch and sucrose metabolism	comp68373_c0	ghr-MIR7499-p3_2ss10GC17CG	sp|P0AC86|PHSG_ECOLI Glycogen phosphorylase OS=Escherichia coli (strain K12) GN=glgP PE=3 SV=1
ko00500	Starch and sucrose metabolism	comp68338_c0	ghr-MIR7499-p3_2ss10GC17CG	sp|P0AC86|PHSG_ECOLI Glycogen phosphorylase OS=Escherichia coli (strain K12) GN=glgP PE=3 SV=1
ko00500	Starch and sucrose metabolism	comp60722_c0	ghr-MIR7499-p3_2ss10GC17CG	sp|O22256|PME20_ARATH Probable pectinesterase/pectinesterase inhibitor 20 OS=Arabidopsis thaliana GN=PME20 PE=2 SV=2
ko00500	Starch and sucrose metabolism	comp63913_c0	col-miRn-5p-32910_149	sp|P27598|PHSL_IPOBA Alpha-1,4 glucan phosphorylase L isozyme, chloroplastic/amyloplastic OS=Ipomoea batatas PE=2 SV=1
ko00500	Starch and sucrose metabolism	comp63913_c0	col-miRn-5p-32910_149	sp|P27598|PHSL_IPOBA Alpha-1,4 glucan phosphorylase L isozyme, chloroplastic/amyloplastic OS=Ipomoea batatas PE=2 SV=1
ko00500	Starch and sucrose metabolism	comp569112_c0	col-miRn-5p-32910_149	sp|P53535|PHSL2_SOLTU Alpha-1,4 glucan phosphorylase L-2 isozyme, chloroplastic/amyloplastic OS=Solanum tuberosum GN=STP-1 PE=1 SV=1
ko00500	Starch and sucrose metabolism	comp66504_c0	col-miRn-5p-32910_149	sp|Q9LIS3|GAE6_ARATH UDP-glucuronate 4-epimerase 6 OS=Arabidopsis thaliana GN=GAE6 PE=1 SV=1
ko00500	Starch and sucrose metabolism	comp67399_c0	col-miRn-5p-32910_149	sp|O22149|PME17_ARATH Probable pectinesterase/pectinesterase inhibitor 17 OS=Arabidopsis thaliana GN=PME17 PE=2 SV=2
ko00500	Starch and sucrose metabolism	comp45126_c0	col-miRn-5p-32910_149	sp|O82616|SCRK5_ARATH Putative fructokinase-5 OS=Arabidopsis thaliana GN=At4g10260 PE=2 SV=1
ko00500	Starch and sucrose metabolism	comp67618_c0	col-miRn-5p-32910_149	sp|Q9FK05|PME61_ARATH Probable pectinesterase/pectinesterase inhibitor 61 OS=Arabidopsis thaliana GN=PME61 PE=1 SV=1
ko00500	Starch and sucrose metabolism	comp68373_c0	col-miRn-3p-63944_75	sp|P0AC86|PHSG_ECOLI Glycogen phosphorylase OS=Escherichia coli (strain K12) GN=glgP PE=3 SV=1
ko00500	Starch and sucrose metabolism	comp185362_c0	rco-MIR403a-p3_1ss2TG	sp|Q8VYG3|GUN16_ARATH Endoglucanase 16 OS=Arabidopsis thaliana GN=At3g43860 PE=2 SV=1
ko00500	Starch and sucrose metabolism	comp62896_c0	bol-miR398a-3p	sp|Q43062|PME_PRUPE Pectinesterase/pectinesterase inhibitor PPE8B OS=Prunus persica PE=2 SV=1
ko00500	Starch and sucrose metabolism	comp65292_c0	bol-miR398a-3p	sp|Q9FH80|BAM8_ARATH Beta-amylase 8 OS=Arabidopsis thaliana GN=BAM8 PE=2 SV=1
ko00500	Starch and sucrose metabolism	comp67102_c0	stu-miR482a-5p_2ss3AG12AC	sp|Q43111|PME3_PHAVU Pectinesterase 3 OS=Phaseolus vulgaris GN=MPE3 PE=2 SV=1
ko00500	Starch and sucrose metabolism	comp51964_c0	stu-miR482a-5p_2ss3AG12AC	sp|Q94KD8|BXL2_ARATH Probable beta-D-xylosidase 2 OS=Arabidopsis thaliana GN=BXL2 PE=2 SV=1
ko00500	Starch and sucrose metabolism	comp67345_c0	vun-miR169	sp|Q9SGZ5|BXL7_ARATH Probable beta-D-xylosidase 7 OS=Arabidopsis thaliana GN=BXL7 PE=2 SV=2
ko00500	Starch and sucrose metabolism	comp68170_c0	csi-miR166e-5p	sp|P07363|CHEA_ECOLI Chemotaxis protein CheA OS=Escherichia coli (strain K12) GN=cheA PE=1 SV=3
ko00500	Starch and sucrose metabolism	comp63577_c0	csi-miR166e-5p	sp|P10691|SUS1_SOLTU Sucrose synthase OS=Solanum tuberosum PE=1 SV=1
ko00500	Starch and sucrose metabolism	comp67500_c0	aly-miR170-5p_1ss8CA	sp|Q94A41|AMY3_ARATH Alpha-amylase 3, chloroplastic OS=Arabidopsis thaliana GN=AMY3 PE=2 SV=1
ko00500	Starch and sucrose metabolism	comp41203_c0	aly-miR170-5p_1ss8CA	sp|Q9STI6|GAE5_ARATH UDP-glucuronate 4-epimerase 5 OS=Arabidopsis thaliana GN=GAE5 PE=2 SV=1
ko00500	Starch and sucrose metabolism	comp50887_c0	aly-miR170-5p_1ss8CA	sp|Q8L6H7|SFR2_ORYSJ Beta-glucosidase-like SFR2, chloroplastic OS=Oryza sativa subsp. japonica GN=SFR2 PE=2 SV=1
ko00500	Starch and sucrose metabolism	comp63913_c0	ssl-miR394	sp|P27598|PHSL_IPOBA Alpha-1,4 glucan phosphorylase L isozyme, chloroplastic/amyloplastic OS=Ipomoea batatas PE=2 SV=1
ko00500	Starch and sucrose metabolism	comp62548_c0	ssl-miR394	sp|P55233|GLGL1_BETVU Glucose-1-phosphate adenylyltransferase large subunit, chloroplastic/amyloplastic OS=Beta vulgaris GN=AGPS1 PE=2 SV=1
ko00500	Starch and sucrose metabolism	comp66757_c0	ssl-miR394	sp|O23617|TPS5_ARATH Alpha,alpha-trehalose-phosphate synthase [UDP-forming] 5 OS=Arabidopsis thaliana GN=TPS5 PE=1 SV=2
ko00500	Starch and sucrose metabolism	comp65295_c0	ath-MIR5645b-p3_2ss19TG22CA	sp|Q9M0B6|GAE1_ARATH UDP-glucuronate 4-epimerase 1 OS=Arabidopsis thaliana GN=GAE1 PE=1 SV=1
ko00500	Starch and sucrose metabolism	comp68085_c0	ath-MIR5645b-p3_2ss19TG22CA	sp|Q9LPS1|HXK3_ARATH Hexokinase-3 OS=Arabidopsis thaliana GN=At1g50460 PE=1 SV=1
ko00500	Starch and sucrose metabolism	comp185362_c0	rco-MIR403a-p5_1ss2TG	sp|Q8VYG3|GUN16_ARATH Endoglucanase 16 OS=Arabidopsis thaliana GN=At3g43860 PE=2 SV=1
ko00500	Starch and sucrose metabolism	comp67495_c0	gma-miR393a	sp|O22060|SPSA1_CITUN Probable sucrose-phosphate synthase 1 OS=Citrus unshiu GN=SPS1 PE=2 SV=1
ko00500	Starch and sucrose metabolism	comp63334_c0	htu-miR160a_R+1	sp|P29001|INVA_VIGRR Acid beta-fructofuranosidase OS=Vigna radiata var. radiata GN=INVA PE=1 SV=1
ko00500	Starch and sucrose metabolism	comp58995_c0	gma-MIR5368-p3_1ss16CT_2	sp|Q8VYZ3|PME53_ARATH Probable pectinesterase 53 OS=Arabidopsis thaliana GN=PME53 PE=2 SV=1
ko00500	Starch and sucrose metabolism	comp68170_c0	tcc-miR403a	sp|P07363|CHEA_ECOLI Chemotaxis protein CheA OS=Escherichia coli (strain K12) GN=cheA PE=1 SV=3
ko00500	Starch and sucrose metabolism	comp67868_c0	dpr-miR408_L-1	sp|Q43866|INV1_ARATH Beta-fructofuranosidase, insoluble isoenzyme CWINV1 OS=Arabidopsis thaliana GN=CWINV1 PE=1 SV=1
ko00500	Starch and sucrose metabolism	comp58496_c0	ptc-miR172b-5p	sp|Q9LIR6|BAM1_ARATH Beta-amylase 1, chloroplastic OS=Arabidopsis thaliana GN=BAM1 PE=1 SV=1
ko00500	Starch and sucrose metabolism	comp65730_c0	ptc-miR172b-5p	sp|Q94AH8|TPS6_ARATH Alpha,alpha-trehalose-phosphate synthase [UDP-forming] 6 OS=Arabidopsis thaliana GN=TPS6 PE=1 SV=2
ko00500	Starch and sucrose metabolism	comp65666_c0	ptc-miR172b-5p	sp|O64896|TPPA_ARATH Trehalose-phosphate phosphatase A OS=Arabidopsis thaliana GN=TPPA PE=1 SV=1
ko00500	Starch and sucrose metabolism	comp58965_c0	ssl-miR397_1ss2CA	sp|P32811|PHSH_SOLTU Alpha-glucan phosphorylase, H isozyme OS=Solanum tuberosum PE=1 SV=1
ko00500	Starch and sucrose metabolism	comp68521_c0	ssl-miR397_1ss2CA	sp|P31434|XYLS_ECOLI Alpha-xylosidase OS=Escherichia coli (strain K12) GN=yicI PE=1 SV=2
ko00500	Starch and sucrose metabolism	comp67863_c0	ssl-miR397_1ss2CA	sp|Q43784|SSG1_MANES Granule-bound starch synthase 1, chloroplastic/amyloplastic OS=Manihot esculenta GN=WAXY PE=2 SV=1
ko00500	Starch and sucrose metabolism	comp14251_c0	ssl-miR828	sp|Q9ZT82|CALSC_ARATH Callose synthase 12 OS=Arabidopsis thaliana GN=CALS12 PE=1 SV=1
ko00500	Starch and sucrose metabolism	comp62293_c0	ssl-miR828	sp|P83344|XYNB_PRUPE Putative beta-D-xylosidase (Fragment) OS=Prunus persica PE=2 SV=1
ko00500	Starch and sucrose metabolism	comp67495_c0	col-miRn-5p-120322_33	sp|O22060|SPSA1_CITUN Probable sucrose-phosphate synthase 1 OS=Citrus unshiu GN=SPS1 PE=2 SV=1
ko00500	Starch and sucrose metabolism	comp68521_c0	aqc-miR172b_1ss21TG	sp|P31434|XYLS_ECOLI Alpha-xylosidase OS=Escherichia coli (strain K12) GN=yicI PE=1 SV=2
ko00500	Starch and sucrose metabolism	comp66167_c0	aqc-miR172b_1ss21TG	sp|Q9LRA7|TPS9_ARATH Probable alpha,alpha-trehalose-phosphate synthase [UDP-forming] 9 OS=Arabidopsis thaliana GN=TPS9 PE=1 SV=1
ko00500	Starch and sucrose metabolism	comp66167_c0	aqc-miR172b_1ss21TG	sp|Q9LRA7|TPS9_ARATH Probable alpha,alpha-trehalose-phosphate synthase [UDP-forming] 9 OS=Arabidopsis thaliana GN=TPS9 PE=1 SV=1
ko00500	Starch and sucrose metabolism	comp6164_c0	aqc-miR172b_1ss21TG	sp|O80738|TPS10_ARATH Probable alpha,alpha-trehalose-phosphate synthase [UDP-forming] 10 OS=Arabidopsis thaliana GN=TPS10 PE=2 SV=1
ko00500	Starch and sucrose metabolism	comp68357_c0	ama-miR396-5p_1ss21TG	sp|O22060|SPSA1_CITUN Probable sucrose-phosphate synthase 1 OS=Citrus unshiu GN=SPS1 PE=2 SV=1
ko00500	Starch and sucrose metabolism	comp54469_c0	ama-miR396-5p_1ss21TG	sp|Q9SM59|PGMP_PEA Phosphoglucomutase, chloroplastic OS=Pisum sativum GN=PGMP PE=1 SV=1
ko00500	Starch and sucrose metabolism	comp30274_c0	ama-miR396-5p_1ss21TG	sp|P93568|SSY1_SOLTU Soluble starch synthase 1, chloroplastic/amyloplastic OS=Solanum tuberosum PE=2 SV=1
ko00500	Starch and sucrose metabolism	comp66167_c0	ama-miR396-5p_1ss21TG	sp|Q9LRA7|TPS9_ARATH Probable alpha,alpha-trehalose-phosphate synthase [UDP-forming] 9 OS=Arabidopsis thaliana GN=TPS9 PE=1 SV=1
ko00500	Starch and sucrose metabolism	comp66757_c0	lja-miR167_R+1_1ss21GT	sp|O23617|TPS5_ARATH Alpha,alpha-trehalose-phosphate synthase [UDP-forming] 5 OS=Arabidopsis thaliana GN=TPS5 PE=1 SV=2
ko00500	Starch and sucrose metabolism	comp66184_c1	lja-miR167_R+1_1ss21GT	sp|Q9LMI0|TPS7_ARATH Probable alpha,alpha-trehalose-phosphate synthase [UDP-forming] 7 OS=Arabidopsis thaliana GN=TPS7 PE=1 SV=1
ko00500	Starch and sucrose metabolism	comp68085_c0	col-miRn-3p-23356_203	sp|Q9LPS1|HXK3_ARATH Hexokinase-3 OS=Arabidopsis thaliana GN=At1g50460 PE=1 SV=1
ko00500	Starch and sucrose metabolism	comp68110_c0	col-miRn-3p-23356_203	sp|P19595|UGPA_SOLTU UTP--glucose-1-phosphate uridylyltransferase OS=Solanum tuberosum PE=1 SV=3
ko00500	Starch and sucrose metabolism	comp52143_c0	lja-miR390a-3p_1ss8CT	-
ko00500	Starch and sucrose metabolism	comp67345_c0	lja-miR390a-3p_1ss8CT	sp|Q9SGZ5|BXL7_ARATH Probable beta-D-xylosidase 7 OS=Arabidopsis thaliana GN=BXL7 PE=2 SV=2
ko00500	Starch and sucrose metabolism	comp65424_c0	rco-miR156e_L+1R-1	sp|Q67XC9|TPPD_ARATH Probable trehalose-phosphate phosphatase D OS=Arabidopsis thaliana GN=TPPD PE=2 SV=1
ko00500	Starch and sucrose metabolism	comp57665_c0	rco-miR156e_L+1R-1	sp|P85076|PME_ACTDE Pectinesterase OS=Actinidia deliciosa PE=1 SV=1
ko00500	Starch and sucrose metabolism	comp61872_c0	gra-miR167a_L-2R+2	sp|P48979|PGLR_PRUPE Polygalacturonase OS=Prunus persica PE=2 SV=1
ko00500	Starch and sucrose metabolism	comp68156_c0	gra-miR167a_L-2R+2	sp|Q9ZSQ4|PGMC_POPTN Phosphoglucomutase, cytoplasmic OS=Populus tremula GN=PGM1 PE=2 SV=1
ko00500	Starch and sucrose metabolism	comp60272_c0	gra-miR167a_L-2R+2	sp|Q00081|GLGL1_SOLTU Glucose-1-phosphate adenylyltransferase large subunit 1 (Fragment) OS=Solanum tuberosum GN=AGPS1 PE=2 SV=1
ko00500	Starch and sucrose metabolism	comp37927_c0	gra-miR167a_L-2R+2	sp|Q9FM68|BAM4_ARATH Inactive beta-amylase 4, chloroplastic OS=Arabidopsis thaliana GN=BAM4 PE=2 SV=1
ko00500	Starch and sucrose metabolism	comp68521_c0	nta-MIR6149a-p5_2ss18CT21TA	sp|P31434|XYLS_ECOLI Alpha-xylosidase OS=Escherichia coli (strain K12) GN=yicI PE=1 SV=2
ko00500	Starch and sucrose metabolism	comp68357_c0	amg-miR396	sp|O22060|SPSA1_CITUN Probable sucrose-phosphate synthase 1 OS=Citrus unshiu GN=SPS1 PE=2 SV=1
ko00500	Starch and sucrose metabolism	comp54469_c0	amg-miR396	sp|Q9SM59|PGMP_PEA Phosphoglucomutase, chloroplastic OS=Pisum sativum GN=PGMP PE=1 SV=1
ko00500	Starch and sucrose metabolism	comp30274_c0	amg-miR396	sp|P93568|SSY1_SOLTU Soluble starch synthase 1, chloroplastic/amyloplastic OS=Solanum tuberosum PE=2 SV=1
ko00500	Starch and sucrose metabolism	comp66167_c0	amg-miR396	sp|Q9LRA7|TPS9_ARATH Probable alpha,alpha-trehalose-phosphate synthase [UDP-forming] 9 OS=Arabidopsis thaliana GN=TPS9 PE=1 SV=1
ko00500	Starch and sucrose metabolism	comp62588_c0	aly-miR171c-5p_1ss5AG	sp|Q42896|SCRK2_SOLLC Fructokinase-2 OS=Solanum lycopersicum GN=FRK2 PE=1 SV=2
ko00500	Starch and sucrose metabolism	comp41203_c0	cpa-miR164d	sp|Q9STI6|GAE5_ARATH UDP-glucuronate 4-epimerase 5 OS=Arabidopsis thaliana GN=GAE5 PE=2 SV=1
ko00500	Starch and sucrose metabolism	comp68338_c0	dpr-miR167a_L-2R+3	sp|P0AC86|PHSG_ECOLI Glycogen phosphorylase OS=Escherichia coli (strain K12) GN=glgP PE=3 SV=1
ko00500	Starch and sucrose metabolism	comp68521_c0	dpr-miR167a_L-2R+3	sp|P31434|XYLS_ECOLI Alpha-xylosidase OS=Escherichia coli (strain K12) GN=yicI PE=1 SV=2
ko00500	Starch and sucrose metabolism	comp52273_c0	dpr-miR167a_L-2R+3	sp|B7LAX0|G6PI_ECO55 Glucose-6-phosphate isomerase OS=Escherichia coli (strain 55989 / EAEC) GN=pgi PE=3 SV=1
ko00500	Starch and sucrose metabolism	comp68170_c0	lja-miR171c	sp|P07363|CHEA_ECOLI Chemotaxis protein CheA OS=Escherichia coli (strain K12) GN=cheA PE=1 SV=3
ko00500	Starch and sucrose metabolism	comp64491_c0	gma-miR319a	sp|Q5Z9Z0|BGL24_ORYSJ Beta-glucosidase 24 OS=Oryza sativa subsp. japonica GN=BGLU24 PE=2 SV=1
ko00500	Starch and sucrose metabolism	comp64491_c0	gma-miR319a	sp|Q5Z9Z0|BGL24_ORYSJ Beta-glucosidase 24 OS=Oryza sativa subsp. japonica GN=BGLU24 PE=2 SV=1
ko00500	Starch and sucrose metabolism	comp68237_c0	gma-miR319a	sp|O23647|GLGB1_ARATH 1,4-alpha-glucan-branching enzyme 2-1, chloroplastic/amyloplastic OS=Arabidopsis thaliana GN=SBE2.1 PE=1 SV=1
ko00500	Starch and sucrose metabolism	comp65083_c0	col-miRn-5p-46619_106	sp|Q9LV33|BGL44_ARATH Beta-glucosidase 44 OS=Arabidopsis thaliana GN=BGLU44 PE=2 SV=1
ko00500	Starch and sucrose metabolism	comp41390_c0	mes-MIR477g-p5_1ss1CT	sp|Q8RY24|SPSA3_ARATH Probable sucrose-phosphate synthase 3 OS=Arabidopsis thaliana GN=SPS3 PE=2 SV=1
ko00500	Starch and sucrose metabolism	comp65083_c0	mes-MIR477g-p5_1ss1CT	sp|Q9LV33|BGL44_ARATH Beta-glucosidase 44 OS=Arabidopsis thaliana GN=BGLU44 PE=2 SV=1
ko00500	Starch and sucrose metabolism	comp68170_c0	mes-MIR477g-p5_1ss1CT	sp|P07363|CHEA_ECOLI Chemotaxis protein CheA OS=Escherichia coli (strain K12) GN=cheA PE=1 SV=3
ko00500	Starch and sucrose metabolism	comp5453_c0	ama-miR396-3p_L-2R+2	sp|Q7XSK0|BGL18_ORYSJ Beta-glucosidase 18 OS=Oryza sativa subsp. japonica GN=BGLU18 PE=2 SV=2
ko00500	Starch and sucrose metabolism	comp97403_c0	ama-miR396-3p_L-2R+2	sp|Q2QS14|UGDH4_ORYSJ UDP-glucose 6-dehydrogenase 4 OS=Oryza sativa subsp. japonica GN=UGD4 PE=2 SV=1
ko00500	Starch and sucrose metabolism	comp68156_c0	ahy-miR167-3p_2ss8GA15TC	sp|Q9ZSQ4|PGMC_POPTN Phosphoglucomutase, cytoplasmic OS=Populus tremula GN=PGM1 PE=2 SV=1
ko00500	Starch and sucrose metabolism	comp66167_c0	nta-miR172d	sp|Q9LRA7|TPS9_ARATH Probable alpha,alpha-trehalose-phosphate synthase [UDP-forming] 9 OS=Arabidopsis thaliana GN=TPS9 PE=1 SV=1
ko00500	Starch and sucrose metabolism	comp66167_c0	nta-miR172d	sp|Q9LRA7|TPS9_ARATH Probable alpha,alpha-trehalose-phosphate synthase [UDP-forming] 9 OS=Arabidopsis thaliana GN=TPS9 PE=1 SV=1
ko00500	Starch and sucrose metabolism	comp68521_c0	nta-miR172d	sp|P31434|XYLS_ECOLI Alpha-xylosidase OS=Escherichia coli (strain K12) GN=yicI PE=1 SV=2
ko00500	Starch and sucrose metabolism	comp6164_c0	nta-miR172d	sp|O80738|TPS10_ARATH Probable alpha,alpha-trehalose-phosphate synthase [UDP-forming] 10 OS=Arabidopsis thaliana GN=TPS10 PE=2 SV=1
ko00500	Starch and sucrose metabolism	comp68373_c0	nta-miR172d	sp|P0AC86|PHSG_ECOLI Glycogen phosphorylase OS=Escherichia coli (strain K12) GN=glgP PE=3 SV=1
ko00500	Starch and sucrose metabolism	comp67345_c0	nta-miR172d	sp|Q9SGZ5|BXL7_ARATH Probable beta-D-xylosidase 7 OS=Arabidopsis thaliana GN=BXL7 PE=2 SV=2
ko00500	Starch and sucrose metabolism	comp58496_c0	ppe-miR172a-5p_1ss21GA	sp|Q9LIR6|BAM1_ARATH Beta-amylase 1, chloroplastic OS=Arabidopsis thaliana GN=BAM1 PE=1 SV=1
ko00500	Starch and sucrose metabolism	comp65666_c0	ppe-miR172a-5p_1ss21GA	sp|O64896|TPPA_ARATH Trehalose-phosphate phosphatase A OS=Arabidopsis thaliana GN=TPPA PE=1 SV=1
ko00500	Starch and sucrose metabolism	comp401466_c0	ama-miR396-5p	sp|P27934|AMY3E_ORYSJ Alpha-amylase isozyme 3E OS=Oryza sativa subsp. japonica GN=AMY1.4 PE=2 SV=1
ko00500	Starch and sucrose metabolism	comp30274_c0	ama-miR396-5p	sp|P93568|SSY1_SOLTU Soluble starch synthase 1, chloroplastic/amyloplastic OS=Solanum tuberosum PE=2 SV=1
ko00500	Starch and sucrose metabolism	comp59974_c0	ama-miR396-5p	sp|Q42525|HXK1_ARATH Hexokinase-1 OS=Arabidopsis thaliana GN=HXK1 PE=1 SV=2
ko00500	Starch and sucrose metabolism	comp59974_c0	ama-miR396-5p	sp|Q42525|HXK1_ARATH Hexokinase-1 OS=Arabidopsis thaliana GN=HXK1 PE=1 SV=2
ko00500	Starch and sucrose metabolism	comp66167_c0	ama-miR396-5p	sp|Q9LRA7|TPS9_ARATH Probable alpha,alpha-trehalose-phosphate synthase [UDP-forming] 9 OS=Arabidopsis thaliana GN=TPS9 PE=1 SV=1
ko00500	Starch and sucrose metabolism	comp54469_c0	ama-miR396-5p	sp|Q9SM59|PGMP_PEA Phosphoglucomutase, chloroplastic OS=Pisum sativum GN=PGMP PE=1 SV=1
ko00500	Starch and sucrose metabolism	comp60556_c0	ama-miR396-5p	sp|O81416|GUN17_ARATH Endoglucanase 17 OS=Arabidopsis thaliana GN=At4g02290 PE=2 SV=1
ko00500	Starch and sucrose metabolism	comp65655_c0	ama-miR396-5p	sp|A7PZL3|PGLR_VITVI Probable polygalacturonase OS=Vitis vinifera GN=GSVIVT00026920001 PE=1 SV=1
ko00500	Starch and sucrose metabolism	comp68357_c0	ama-miR396-5p	sp|O22060|SPSA1_CITUN Probable sucrose-phosphate synthase 1 OS=Citrus unshiu GN=SPS1 PE=2 SV=1
ko00500	Starch and sucrose metabolism	comp64183_c0	cpa-miR164a	sp|O04893|AGLU_SPIOL Alpha-glucosidase OS=Spinacia oleracea PE=1 SV=1
ko00500	Starch and sucrose metabolism	comp68373_c0	cpa-miR164a	sp|P0AC86|PHSG_ECOLI Glycogen phosphorylase OS=Escherichia coli (strain K12) GN=glgP PE=3 SV=1
ko00500	Starch and sucrose metabolism	comp63427_c0	cpa-miR164a	sp|Q43846|SSY3_SOLTU Soluble starch synthase 3, chloroplastic/amyloplastic OS=Solanum tuberosum GN=SS3 PE=1 SV=1
ko00500	Starch and sucrose metabolism	comp67102_c0	col-miRn-5p-17637_256	sp|Q43111|PME3_PHAVU Pectinesterase 3 OS=Phaseolus vulgaris GN=MPE3 PE=2 SV=1
ko00500	Starch and sucrose metabolism	comp66167_c0	aqc-MIR172b-p3_1ss9TC	sp|Q9LRA7|TPS9_ARATH Probable alpha,alpha-trehalose-phosphate synthase [UDP-forming] 9 OS=Arabidopsis thaliana GN=TPS9 PE=1 SV=1
ko00500	Starch and sucrose metabolism	comp68373_c0	aqc-MIR172b-p3_1ss9TC	sp|P0AC86|PHSG_ECOLI Glycogen phosphorylase OS=Escherichia coli (strain K12) GN=glgP PE=3 SV=1
ko00500	Starch and sucrose metabolism	comp67868_c0	lja-miR171d-3p	sp|Q43866|INV1_ARATH Beta-fructofuranosidase, insoluble isoenzyme CWINV1 OS=Arabidopsis thaliana GN=CWINV1 PE=1 SV=1
ko00500	Starch and sucrose metabolism	comp27103_c0	lja-miR171d-3p	sp|Q9LPS1|HXK3_ARATH Hexokinase-3 OS=Arabidopsis thaliana GN=At1g50460 PE=1 SV=1
ko00500	Starch and sucrose metabolism	comp68338_c0	cca-miR396a-3p_2ss7GT21AG	sp|P0AC86|PHSG_ECOLI Glycogen phosphorylase OS=Escherichia coli (strain K12) GN=glgP PE=3 SV=1
ko00500	Starch and sucrose metabolism	comp68307_c0	cca-miR396a-3p_2ss7GT21AG	sp|Q9ZV48|TPS11_ARATH Probable alpha,alpha-trehalose-phosphate synthase [UDP-forming] 11 OS=Arabidopsis thaliana GN=TPS11 PE=2 SV=1
ko00500	Starch and sucrose metabolism	comp66757_c0	cca-miR396a-3p_2ss7GT21AG	sp|O23617|TPS5_ARATH Alpha,alpha-trehalose-phosphate synthase [UDP-forming] 5 OS=Arabidopsis thaliana GN=TPS5 PE=1 SV=2
ko00500	Starch and sucrose metabolism	comp8208_c0	hbr-MIR159b-p3_1ss20GA	sp|Q94AJ5|PGLR5_ARATH Probable polygalacturonase At1g80170 OS=Arabidopsis thaliana GN=At1g80170 PE=1 SV=1
ko00500	Starch and sucrose metabolism	comp39760_c0	mes-MIR482-p3_2ss9TG21AG	sp|Q9SMP0|NFYC1_ARATH Nuclear transcription factor Y subunit C-1 OS=Arabidopsis thaliana GN=NFYC1 PE=1 SV=1
ko00500	Starch and sucrose metabolism	comp68170_c0	mes-MIR482-p3_2ss9TG21AG	sp|P07363|CHEA_ECOLI Chemotaxis protein CheA OS=Escherichia coli (strain K12) GN=cheA PE=1 SV=3
ko00500	Starch and sucrose metabolism	comp68170_c0	mtr-MIR2592bj-p3_2ss12TC19AT_1	sp|P07363|CHEA_ECOLI Chemotaxis protein CheA OS=Escherichia coli (strain K12) GN=cheA PE=1 SV=3
ko00500	Starch and sucrose metabolism	comp68521_c0	mtr-MIR2592bj-p3_2ss12TC19AT_1	sp|P31434|XYLS_ECOLI Alpha-xylosidase OS=Escherichia coli (strain K12) GN=yicI PE=1 SV=2
ko00500	Starch and sucrose metabolism	comp62779_c0	mtr-MIR2592bj-p3_2ss12TC19AT_1	sp|Q7XSK0|BGL18_ORYSJ Beta-glucosidase 18 OS=Oryza sativa subsp. japonica GN=BGLU18 PE=2 SV=2
ko00500	Starch and sucrose metabolism	comp62779_c0	mtr-MIR2592bj-p3_2ss12TC19AT_1	sp|Q7XSK0|BGL18_ORYSJ Beta-glucosidase 18 OS=Oryza sativa subsp. japonica GN=BGLU18 PE=2 SV=2
ko00500	Starch and sucrose metabolism	comp68020_c0	mtr-MIR2592bj-p3_2ss12TC19AT_1	sp|Q42059|GUN6_ARATH Endoglucanase 6 OS=Arabidopsis thaliana GN=At1g64390 PE=2 SV=2
ko00500	Starch and sucrose metabolism	comp384257_c0	mtr-MIR2592bj-p3_2ss12TC19AT_1	sp|Q8VYZ3|PME53_ARATH Probable pectinesterase 53 OS=Arabidopsis thaliana GN=PME53 PE=2 SV=1
ko00500	Starch and sucrose metabolism	comp68338_c0	mtr-MIR2592bj-p3_2ss12TC19AT_1	sp|P0AC86|PHSG_ECOLI Glycogen phosphorylase OS=Escherichia coli (strain K12) GN=glgP PE=3 SV=1
ko00500	Starch and sucrose metabolism	comp53385_c0	mtr-MIR2592bj-p3_2ss12TC19AT_1	sp|O22818|PGLR6_ARATH Probable polygalacturonase At2g43860 OS=Arabidopsis thaliana GN=At2g43860 PE=2 SV=1
ko00500	Starch and sucrose metabolism	comp68085_c0	mtr-MIR2592bj-p3_2ss12TC19AT_1	sp|Q9LPS1|HXK3_ARATH Hexokinase-3 OS=Arabidopsis thaliana GN=At1g50460 PE=1 SV=1
ko00500	Starch and sucrose metabolism	comp68110_c0	col-miRn-3p-9080_426	sp|P19595|UGPA_SOLTU UTP--glucose-1-phosphate uridylyltransferase OS=Solanum tuberosum PE=1 SV=3
ko00500	Starch and sucrose metabolism	comp66167_c0	ath-miR172a	sp|Q9LRA7|TPS9_ARATH Probable alpha,alpha-trehalose-phosphate synthase [UDP-forming] 9 OS=Arabidopsis thaliana GN=TPS9 PE=1 SV=1
ko00500	Starch and sucrose metabolism	comp66167_c0	ath-miR172a	sp|Q9LRA7|TPS9_ARATH Probable alpha,alpha-trehalose-phosphate synthase [UDP-forming] 9 OS=Arabidopsis thaliana GN=TPS9 PE=1 SV=1
ko00500	Starch and sucrose metabolism	comp68521_c0	ath-miR172a	sp|P31434|XYLS_ECOLI Alpha-xylosidase OS=Escherichia coli (strain K12) GN=yicI PE=1 SV=2
ko00500	Starch and sucrose metabolism	comp6164_c0	ath-miR172a	sp|O80738|TPS10_ARATH Probable alpha,alpha-trehalose-phosphate synthase [UDP-forming] 10 OS=Arabidopsis thaliana GN=TPS10 PE=2 SV=1
ko00500	Starch and sucrose metabolism	comp68373_c0	ath-miR172a	sp|P0AC86|PHSG_ECOLI Glycogen phosphorylase OS=Escherichia coli (strain K12) GN=glgP PE=3 SV=1
ko00500	Starch and sucrose metabolism	comp67345_c0	ath-miR172a	sp|Q9SGZ5|BXL7_ARATH Probable beta-D-xylosidase 7 OS=Arabidopsis thaliana GN=BXL7 PE=2 SV=2
ko00500	Starch and sucrose metabolism	comp68110_c0	col-miRn-3p-150062_24	sp|P19595|UGPA_SOLTU UTP--glucose-1-phosphate uridylyltransferase OS=Solanum tuberosum PE=1 SV=3
ko00500	Starch and sucrose metabolism	comp67500_c0	col-miRn-3p-150062_24	sp|Q94A41|AMY3_ARATH Alpha-amylase 3, chloroplastic OS=Arabidopsis thaliana GN=AMY3 PE=2 SV=1
ko00500	Starch and sucrose metabolism	comp68338_c0	rco-miR167a_R+1	sp|P0AC86|PHSG_ECOLI Glycogen phosphorylase OS=Escherichia coli (strain K12) GN=glgP PE=3 SV=1
ko00500	Starch and sucrose metabolism	comp66757_c0	rco-miR167a_R+1	sp|O23617|TPS5_ARATH Alpha,alpha-trehalose-phosphate synthase [UDP-forming] 5 OS=Arabidopsis thaliana GN=TPS5 PE=1 SV=2
ko00500	Starch and sucrose metabolism	comp52273_c0	rco-miR167a_R+1	sp|B7LAX0|G6PI_ECO55 Glucose-6-phosphate isomerase OS=Escherichia coli (strain 55989 / EAEC) GN=pgi PE=3 SV=1
ko00500	Starch and sucrose metabolism	comp68085_c0	ath-MIR5645e-p3_2ss18TG20TG_2	sp|Q9LPS1|HXK3_ARATH Hexokinase-3 OS=Arabidopsis thaliana GN=At1g50460 PE=1 SV=1
ko00500	Starch and sucrose metabolism	comp61551_c0	col-miRn-5p-1103_1978	sp|P23509|GLGS_SOLTU Glucose-1-phosphate adenylyltransferase small subunit, chloroplastic/amyloplastic OS=Solanum tuberosum PE=1 SV=2
ko00500	Starch and sucrose metabolism	comp68521_c0	ccl-miR171	sp|P31434|XYLS_ECOLI Alpha-xylosidase OS=Escherichia coli (strain K12) GN=yicI PE=1 SV=2
